# Supplementary material
Source: PubMed Central journal article supplement (PMC3071548)
Supplement: NIHMS262735-supplement-Supp_Figure_S1-S4___Table_S1-S6.pdf [file NIHMS262735-supplement-Supp_Figure_S1-S4___Table_S1-S6.pdf]

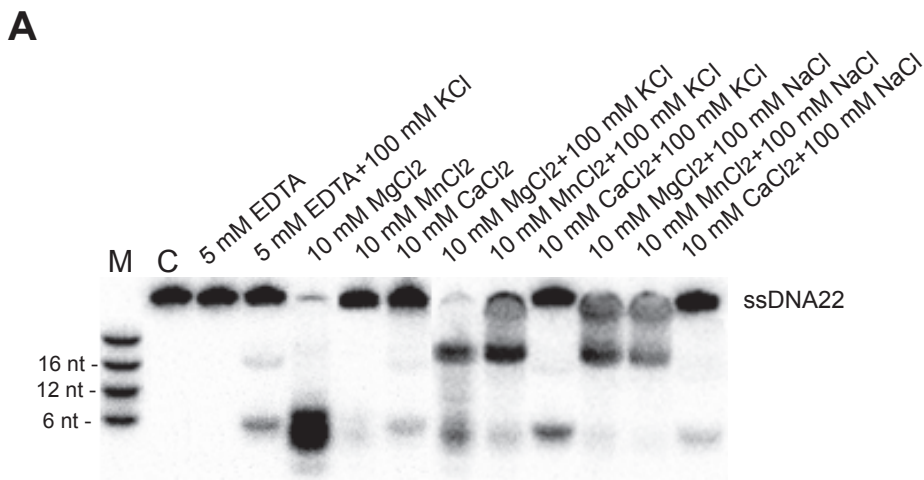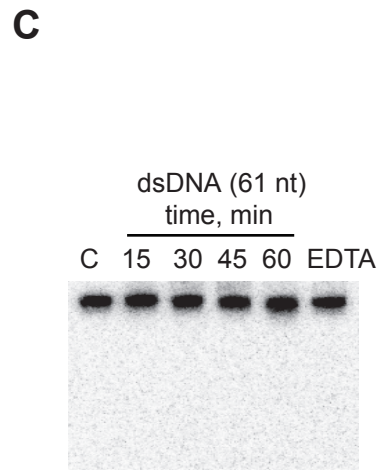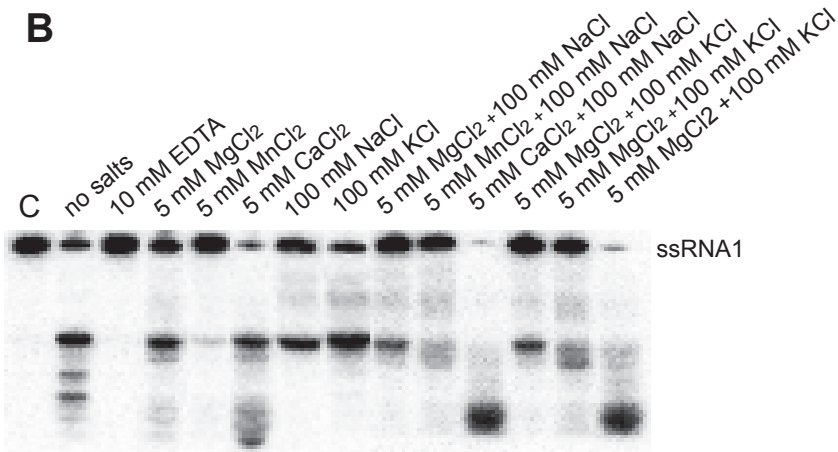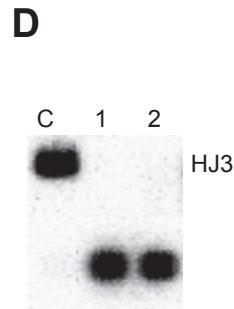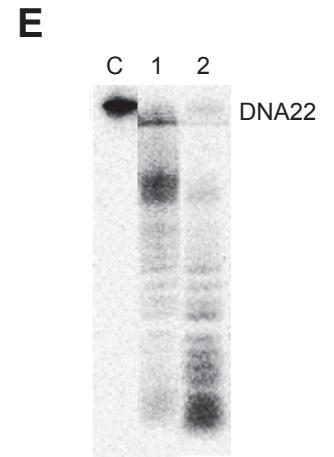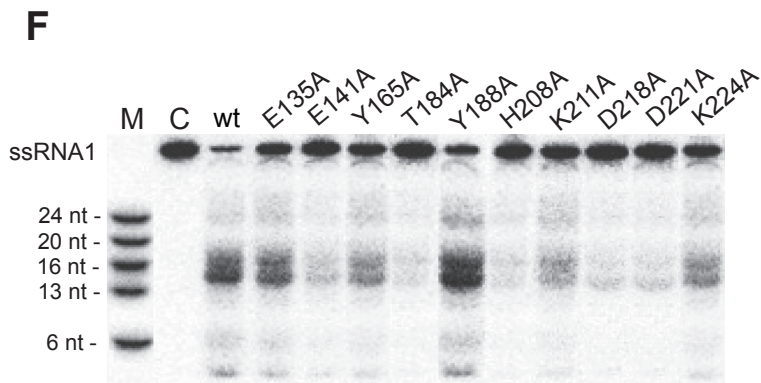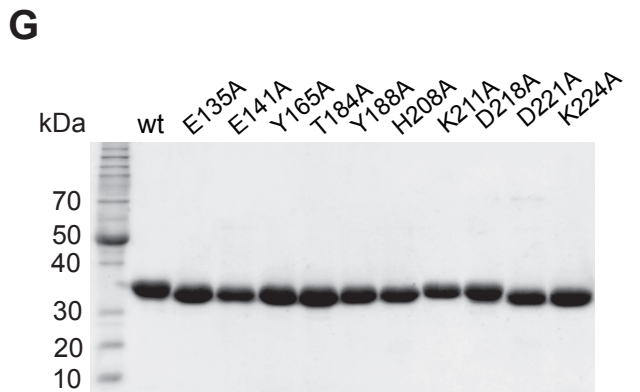

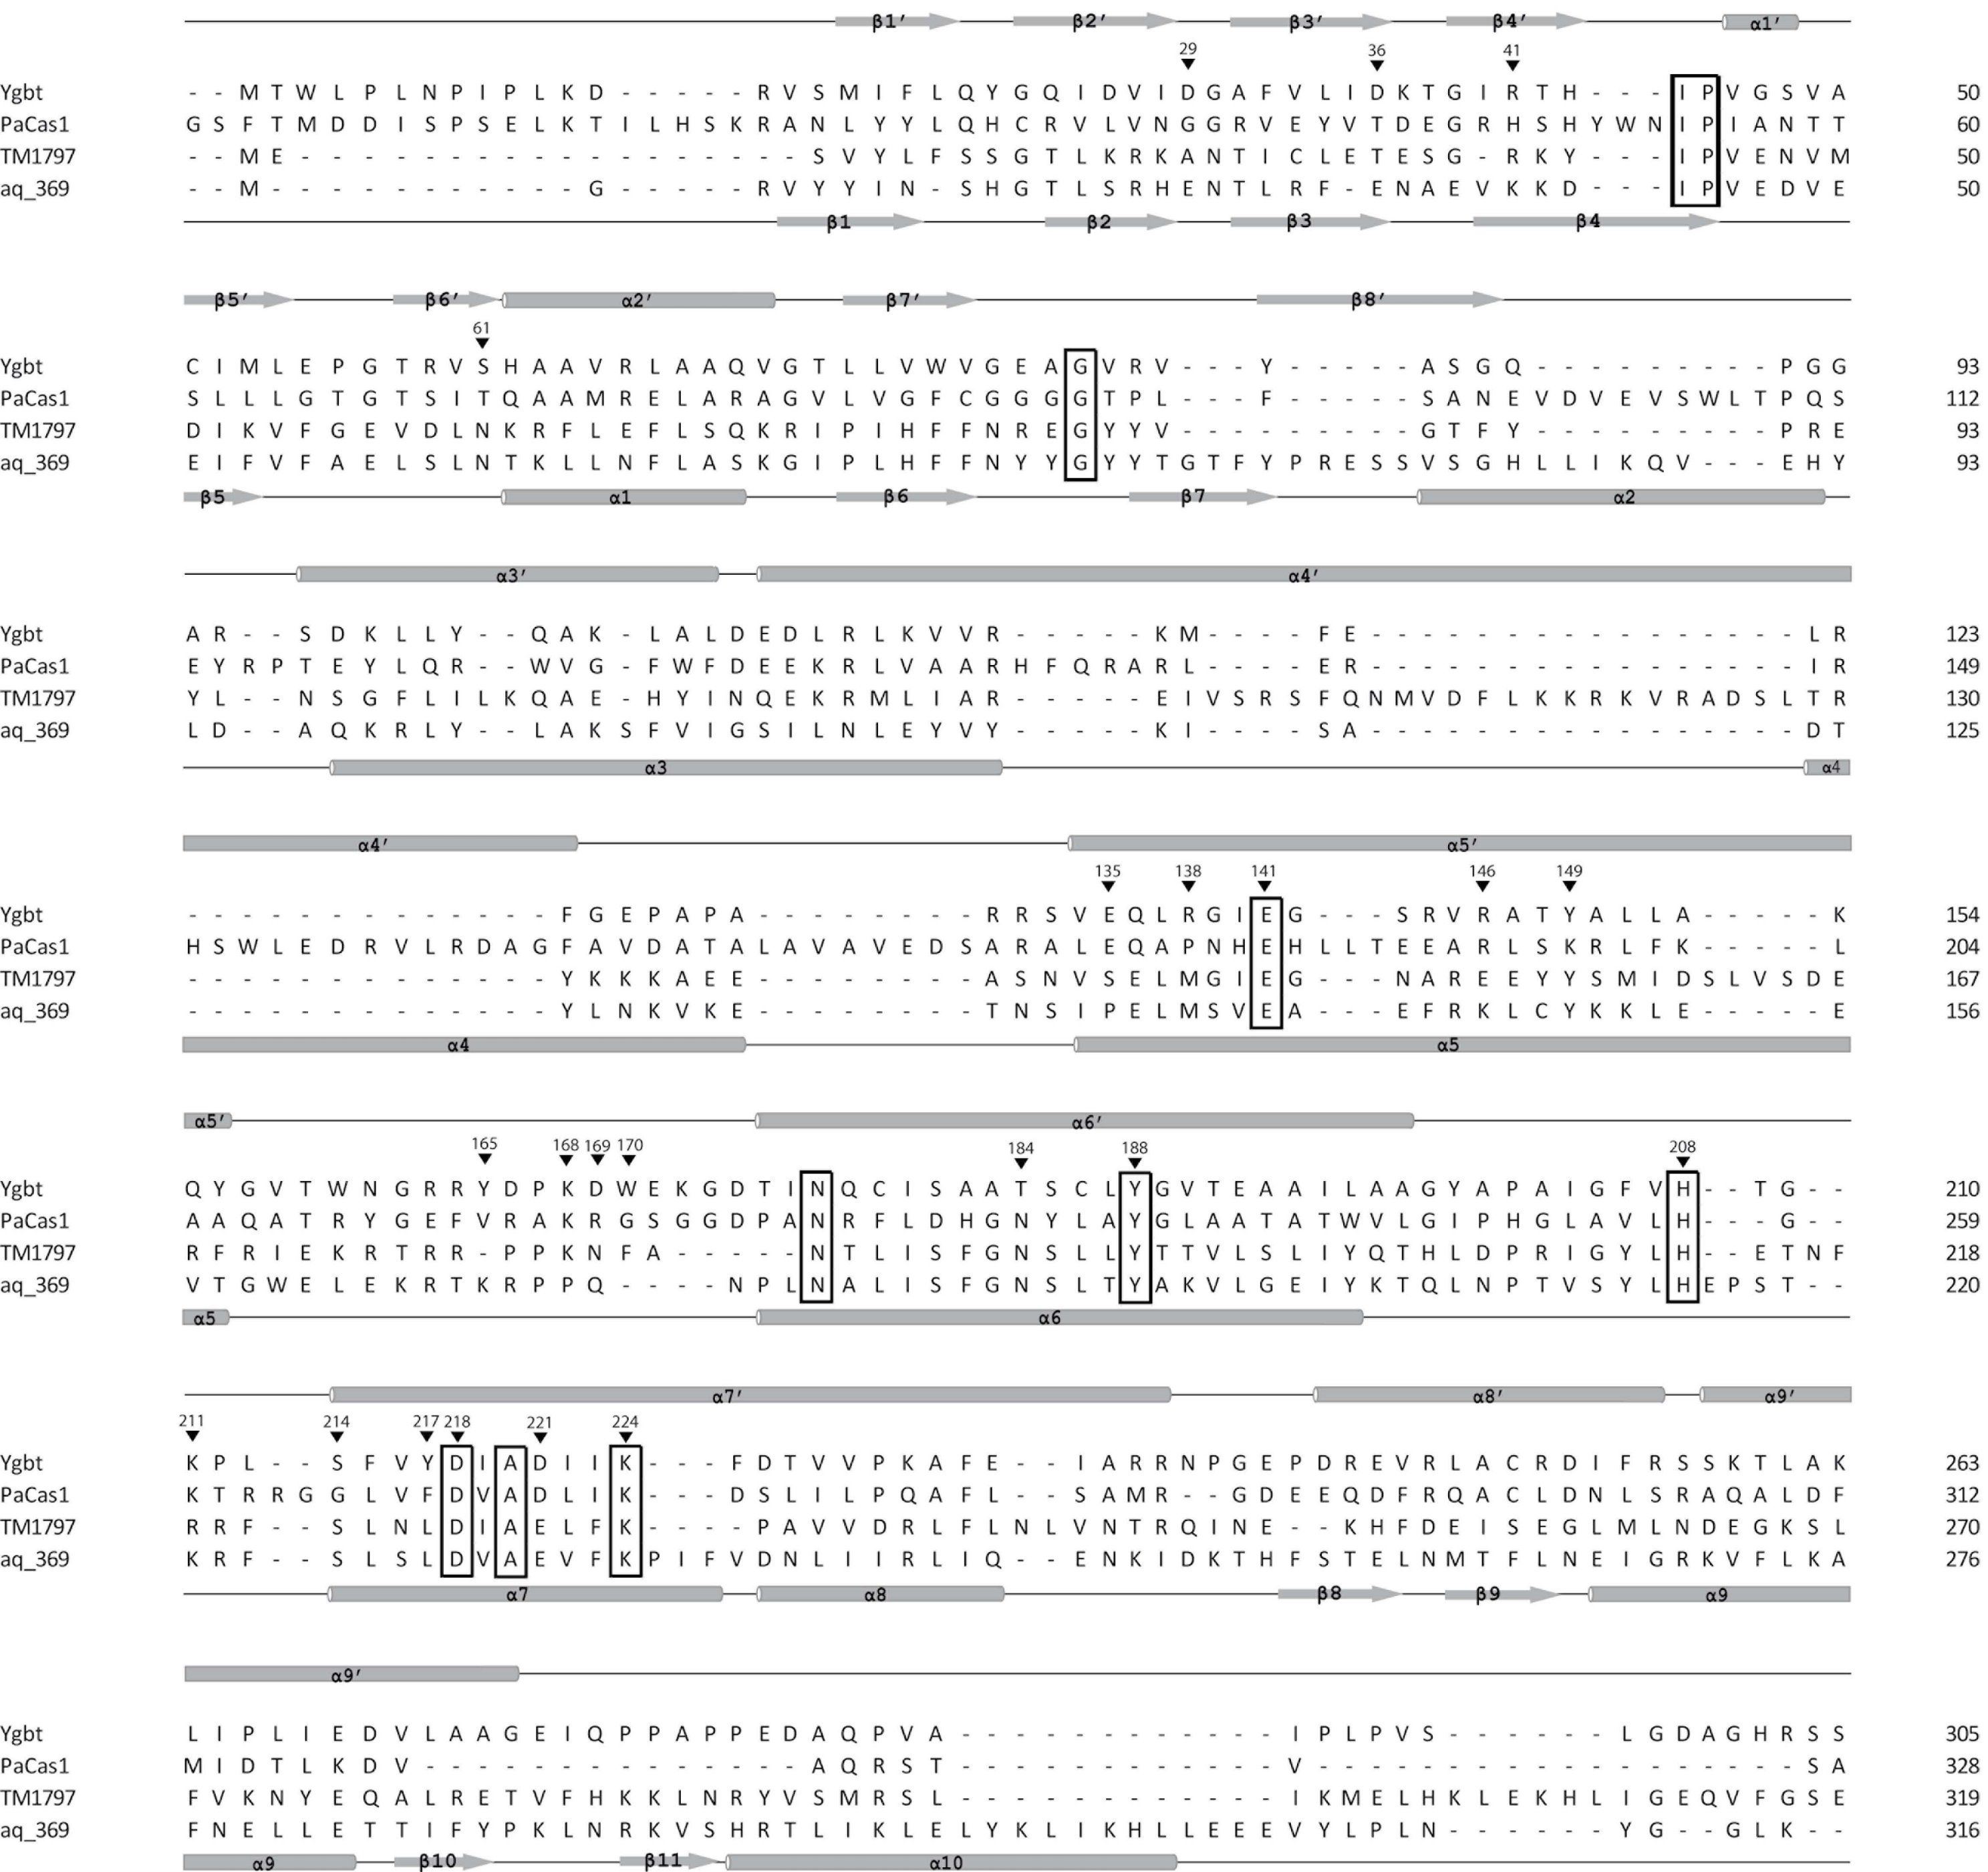

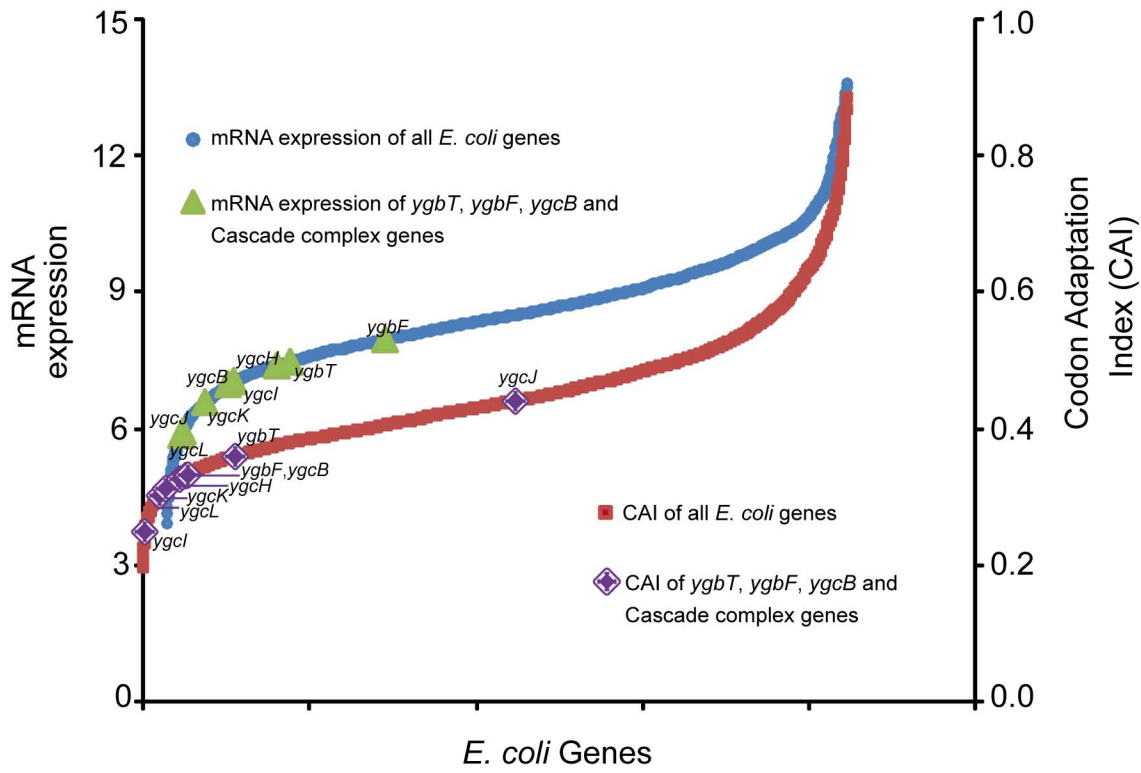

● mRNA expression

6.5-8.0 = Low mRNA expression

8.0-12.0 = Moderate mRNA expression

>12.0 = High mRNA expression

■ Codon Adaptation Index scores

0.4-0.5 = Low CAI

0.5-0.7 = Moderate CAI

>0.7 = High CAI

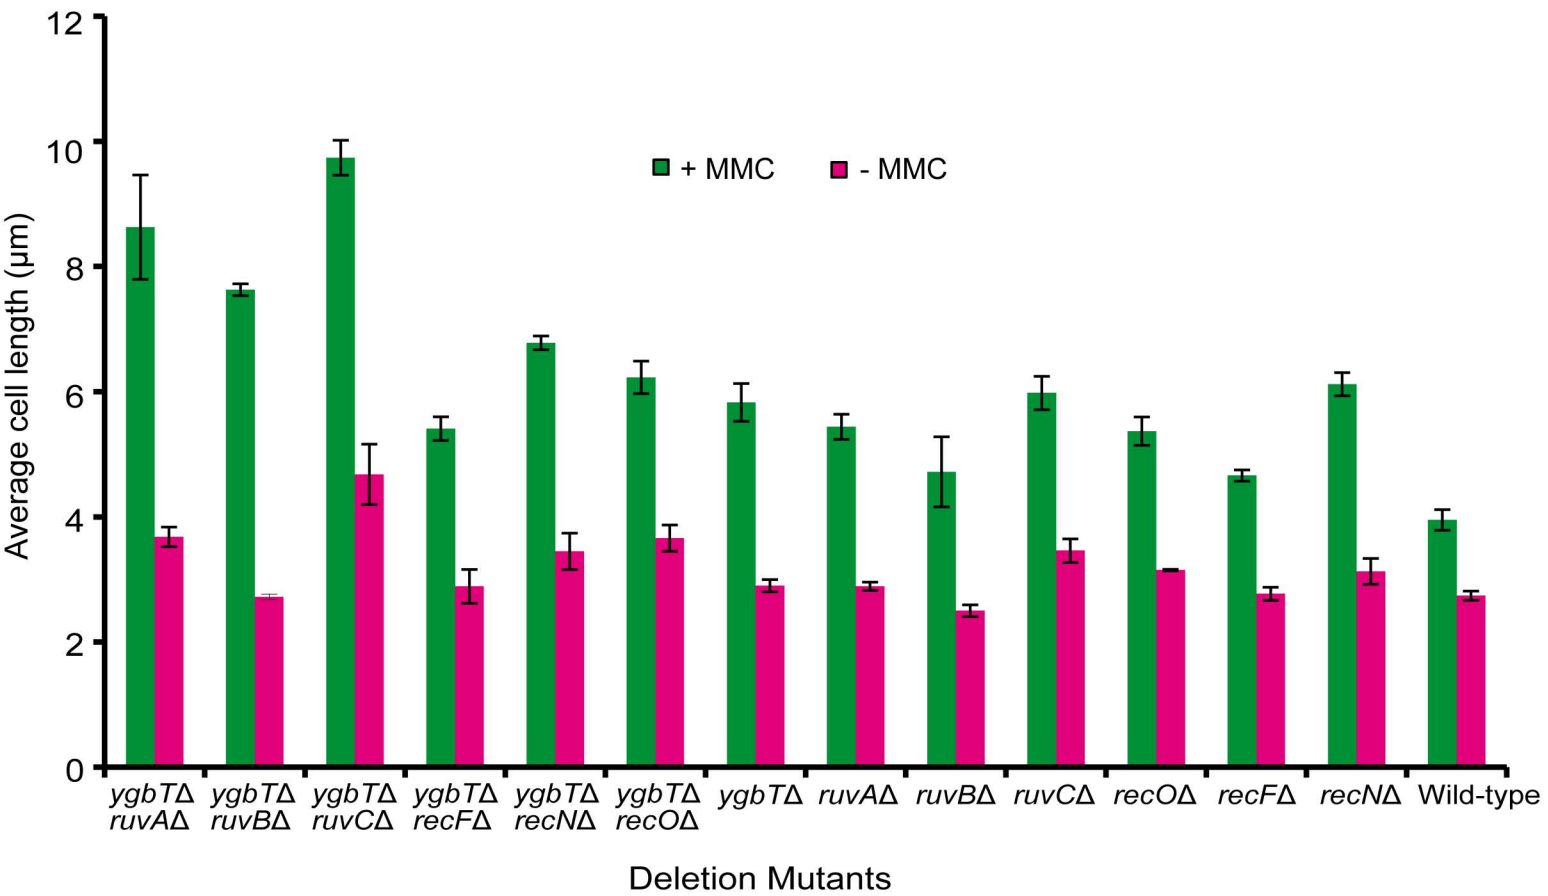

## Supplementary Figure Legends

**Suppl. Fig. 1. Nuclease activity of YgbT.** (**A,B**), Effect of metal cations on the cleavage of ssDNA (**A**) or ssRNA (**B**) by YgbT. 5'-labeled DNA19 or RNA1 substrates were incubated without (**C**) or with YgbT (100 µg/ml) under indicated conditions (37°C, 30 min) and reaction products were analyzed by denaturing PAGE/autoradiography. Lane M shows the 5'-<sup>32</sup>P-labeled marker oligonucleotides. (**C**) Cleavage of dsDNA (61 nt) by YgbT (denaturing PAGE/autoradiography). The 5'-[<sup>32</sup>P]-labeled ssDNA in a complex with complementary oligonucleotide was incubated without protein (**C**), with YgbT for the indicated times (37 °C) or in the presence of 10 mM EDTA for 60 min (EDTA). (**D**) Alanine replacement mutagenesis of YgbT: cleavage of [5'-<sup>32</sup>P]-labeled ssRNA by purified mutant proteins (30 min at 37 °C; denaturing PAGE/autoradiography). (**E, F**) Nuclease activity of the purified C-terminal domain of YgbT. [5'-<sup>32</sup>P]-labeled HJ3 (**E**) or DNA19 (**F**) were incubated (30 min at 37°C) with the full-length YgbT (80 µg/ml; Lane 1) or its C-terminal fragment (96-278 aa; 80 µg/ml; Lane 2) and the reaction products were analyzed by native (**E**) or denaturing (**F**) PAGE/autoradiography. Lanes C show the substrates incubated without protein addition. (**G**) SDS-PAGE analysis of purified wild type and mutant YgbT proteins.

**Suppl. Fig. 2. Structure-based sequence alignment of the *E. coli* YgbT and other Cas1 proteins with solved crystal structures.** The secondary structure elements of YgbT and aq\_369 are shown above and below the alignment, respectively. The conserved residues are boxed, and the YgbT residues mutated to Ala in this study are marked with

an arrowhead above the alignment. The alignment was prepared as individual alignments against YgbT using the SDSC Biology Workbench and the ALIGN software with default settings.

**Suppl. Fig. 3. mRNA expression and codon adaptation indices of *ygbT* and other *cas* genes.** The primary y-axis represents the log-scale mRNA expression level of each gene; while the secondary y-axis represents the codon adaptation index (CAI) score. For details see Suppl. Materials.

**Suppl. Fig. 4. Cell lengths of the MMC-treated *ygbT* and *ruv* deletion strains.** The cell length of various deletion mutants was measured in the presence (green bars) or absence (red bars) of MMC treatment. In each case, cell lengths were averaged for 150 different cells from five independent biological replicates (30 cells per replicate). Error bars indicate standard deviation from mean.

**Table S1.** Oligonucleotides used for preparation of DNA and RNA substrates.

| DNA  | Nucleotide sequence (5' 3')                                                 |
|------|-----------------------------------------------------------------------------|
| 1    | GAACTGAGCAAACCTATTCTTGCCAGCACAATGAA (HJ1)                                   |
| 2    | TTCATTGTGCTGCCAAGAATAGTGTCACTCGATC (HJ1)                                    |
| 3    | GATCGAGTGACACTATTCTTGCGACTTGAGCGG (HJ1)                                     |
| 4    | CCGCTCAAGTCGCCAAGAATAGTTTGCAGAGTTC (HJ1)                                    |
| 5    | TTTGAGTCCGGTTTATCCCTGCTGGCGCGGGGAAGTCCAG (HJ2)                              |
| 6    | CTGGAGTCCCCGCGCCGACAGGGATAAACCGGCA (HJ2)                                    |
| 7    | GTTCCCCGCGCCGACAGGGATAAACCGGCAACGAC (HJ2)                                   |
| 8    | CGAGAGTCCCCGCGCCAGCAGGGATAAACCGGACTCAA (HJ2)                                |
| 9    | TTTGAGTCCGGTTTATCCCTGCTGGCGCGGGGAAGTCCAG (HJ3, YJ, HL, RF, 5/F, 3/F, SA)    |
| 10   | CTGGAGTCCCCGCGCCGACAGGGATAAACCGGCAACGAC (HJ3)                               |
| 11   | GTCGTTGACGGTTTATCCCTGCTGGCGCGGGGAAGTCTCG (HJ3)                              |
| 12   | CTGGAGTCCCCGCGCCAGCAGCCACAAGGGGAAGTCCAG (HJ3, YJ, RF, 5/F, 3/F, SA)         |
| 13   | CTGGAGTCCCCGCGCCGACAGGGATAAACCGGACTCAA (YJ)                                 |
| 14   | AGCGTCGTAAGCAAGATAAATCGTGCGACCGATAAGCAGCTTCGGC (HL)                         |
| 15   | GCCGAAGCTGCTTATCGGTATCTTGCTTACGACGCT (HL)                                   |
| 16   | CTGGAGTCCCCGCGCCGAC (RF, 5/F)                                               |
| 17   | AGGGATAAACCGGACTCAA (RF, 3/F)                                               |
| 18   | GTCGTTGCCGGTTTATGGGGCTAGTGCCCCAACACCAGCGTCAGGC (CF1)                        |
| 19   | GCCTGACGCTGGTGTGGGGCTGATGCCCCATAAACCGGCAACGAC (CF1)                         |
| 20   | GACGGTCGTTGCCGGTTTATGGGGCTAGTGCCCCAACACCAGCGTCAGGCGCTC (CF2)                |
| 21   | GAGCGCTGACGCTGGTGTGGGGCTGATGCCCCATAAACCGGCAACGACCGTC (CF2)                  |
| 22   | GTCCGGTTTATCCCTGCTGGCGCGGGGAAGTCCA (ssDNA, dsDNA 34 nt)                     |
| 23   | TGGAGTCCCCGCGCCAGCAGGGATAAACCGGAC (dsDNA 34 nt)                             |
| 24   | GACGCTGCCGAATTCTACCAGTGCCTTGCTAGGACATCTTGCCACCTGCAGGTTACCC (dsDNA 61 nt)    |
| 25   | GGGTGAACCTGCAGGTGGGCAAAGATGTCCTAGCAAGGCACTGGTAGAATTCGGCAGCGTC (dsDNA 61 nt) |
| RNA1 | AAAUACGUUUUCUCAUUGUCAUUAUUGCGCAUAAGUUUGA (ssRNA, dsRNA)                     |
| RNA2 | UCAACUUAUGCGCAAUAUGACAAUGGAGAAAACGUUUUU (dsRNA)                             |
| RNA3 | AAACUAUUCUUGCCAG                                                            |
| RNA4 | CUGGCAAGAAUAGUUU                                                            |

**Table S2.** Proteins Identified by Mass Spectrometry after Sequential Peptide Affinity Tag Purifications of YgbT and Other *E. coli* Cas and DNA Repair/Recombination Proteins

| Bait <sup>a</sup> | Prey | Confidence Scores <sup>b</sup>           |                                             |                  |
|-------------------|------|------------------------------------------|---------------------------------------------|------------------|
|                   |      | MALDITOF-MS <sup>c</sup> (Z-score > 0.7) | LCMS <sup>d</sup> (Probability score > 40%) | TSC <sup>e</sup> |
| RecB              | flu  | -                                        | 62.36                                       | 1                |
| RecB              | recB | 18.89656198                              | -                                           | -                |
| RecB              | recC | 19.01218388                              | -                                           | -                |
| RecB              | surA | -                                        | 80.33                                       | 1                |
| RecB              | uvrC | -                                        | 99.58                                       | 1                |
| RecB              | ygbT | -                                        | 45.63                                       | 1                |
| RecC              | ygbT | -                                        | 45.63                                       | 1                |
| RuvB              | hupA | -                                        | 99.47                                       | 1                |
| RuvB              | ihfA | -                                        | 57.82                                       | 1                |
| RuvB              | intA | -                                        | 88                                          | 1                |
| RuvB              | ruvB | 38.48352546                              | 99.6                                        | 19               |
| RuvB              | ydgH | -                                        | 91.92                                       | 1                |
| RuvB              | ygbT | -                                        | 45.91                                       | 1                |
| UvrC              | dps  | -                                        | 99.58                                       | 2                |
| UvrC              | hupA | -                                        | 99.6                                        | 1                |
| UvrC              | paaK | -                                        | 90                                          | 1                |
| UvrC              | uvrC | 28.51501786                              | 99.6                                        | 20               |
| UvrC              | ygbT | -                                        | 42.87                                       | 1                |
| YgbT              | dps  | -                                        | 99.6                                        | 1                |
| YgbT              | flu  | -                                        | 62.12                                       | 1                |
| YgbT              | hofQ | 1.254553526                              | -                                           | -                |
| YgbT              | hupA | -                                        | 99.6                                        | 2                |
| YgbT              | ihfA | -                                        | 91.6                                        | 1                |
| YgbT              | intB | 0.722530337                              | -                                           | -                |
| YgbT              | paaK | -                                        | 83.3                                        | 1                |
| YgbT              | recB | 0.784273707                              | -                                           | -                |
| YgbT              | recC | -                                        | 45.91                                       | 1                |
| YgbT              | ruvB | -                                        | 48.84                                       | 1                |
| YgbT              | surA | -                                        | 88.03                                       | 1                |
| YgbT              | uvrC | -                                        | 53.6                                        | 1                |



|      |      |             |       |   |
|------|------|-------------|-------|---|
| YgbT | ydgH | -           | 88    | 4 |
| YgbT | ygcJ | -           | 45.91 | 1 |
| YgbT | ygcH | -           | 45.98 | 1 |
| YgcH | hofQ | 1.034943477 | -     | - |
| YgcH | ygbT | -           | 55.98 | 1 |
| YgcH | ygcH | 24.26470319 | 99.24 | 1 |
| YgcJ | ygbT | -           | 45.76 | 1 |
| YgcJ | ygcJ | 28.56401287 | -     | - |

<sup>a</sup> C-terminally SPA (Sequential Peptide Affinity)-tagged affinity proteins were used as baits and were purified without altering its endogenous expression.

The purified interacting proteins were then detected by mass spectrometry.

<sup>b</sup>STATQUEST [1] and ProFound search engine programs [2] were used to evaluate and assign confidence scores to putative spectral matches for LCMS and MALDITOF-MS, respectively. In LCMS, all peptides for listed proteins were detected at a confidence of at least 40% and above. In the case of MALDITOF-MS, proteins were detected at a confidence of Z-score 0.7 and above.

<sup>c</sup>MALDITOF-MS, Matirx assisted laser desorption/ionization -time-of-flight mass spectrometry.

<sup>d</sup>LCMS, liquid chromatography-tandem mass spectrometry.

<sup>e</sup>Total number of spectral counts (TSC) from LCMS that showed correct spectral matches.

-, unable to detect the protein by MALDITOF-MS or by LCMS.

Note: Shown here are only the proteins that co-purified with YgbT also co-purified with one or more of the other affinity-tagged DNA repair/recombination or Cas proteins.

#### References:

1. Kislinger, T. et al., 2003. PRISM, a generic large scale proteomic investigation strategy for mammals. *Mol Cell Proteomics* 2, 96-106.
2. Babu, M. et al. (2009). Sequential peptide affinity purification system for the systematic isolation and identification of protein complexes from Escherichia coli. *Methods Mol Biol* 564, 373-400.

**Table S3.** Genetic Interaction Scores (*S*) of an Hfr *ygbTA* Deletion Mutant used as a Donor in a Screen against the F- Keio Non-Essential Single Gene Knock-out Library and 149 Potentially Hypomorphic Strains with Essential Genes C-Terminally Tagged with Sequential Peptide Affinity Tags

| b-number <sup>a</sup> of recipient mutant strains | Gene names of recipient <sup>b</sup> F <sup>-</sup> mutant strains | Strain versions <sup>c</sup> | Essential <sup>d</sup> / Non-essential <sup>e</sup> | Description                                                        | <i>S</i> - score for <i>ygbTA</i> screen <sup>f</sup> |
|---------------------------------------------------|--------------------------------------------------------------------|------------------------------|-----------------------------------------------------|--------------------------------------------------------------------|-------------------------------------------------------|
| b0001                                             | thrL                                                               | Isolate 1                    | non-essential                                       | thr operon leader peptide                                          | -1.23                                                 |
| b0001                                             | thrL                                                               | Isolate 2                    | non-essential                                       | thr operon leader peptide                                          | -1.14                                                 |
| b0002                                             | thrA                                                               | Isolate 1                    | non-essential                                       | fused aspartokinase I -!- homoserine dehydrogenase I               | -0.29                                                 |
| b0002                                             | thrA                                                               | Isolate 2                    | non-essential                                       | fused aspartokinase I -!- homoserine dehydrogenase I               | -2.27                                                 |
| b0003                                             | thrB                                                               | Isolate 1                    | non-essential                                       | homoserine kinase                                                  | 1.65                                                  |
| b0003                                             | thrB                                                               | Isolate 2                    | non-essential                                       | homoserine kinase                                                  | 0.78                                                  |
| b0004                                             | thrC                                                               | Isolate 1                    | non-essential                                       | threonine synthase                                                 | 1.00                                                  |
| b0004                                             | thrC                                                               | Isolate 2                    | non-essential                                       | threonine synthase                                                 | 1.04                                                  |
| b0005                                             | yaaX                                                               | Isolate 1                    | non-essential                                       | predicted protein                                                  | -1.81                                                 |
| b0005                                             | yaaX                                                               | Isolate 2                    | non-essential                                       | predicted protein                                                  | 0.05                                                  |
| b0006                                             | yaaA                                                               | Isolate 1                    | non-essential                                       | conserved protein                                                  | -1.34                                                 |
| b0006                                             | yaaA                                                               | Isolate 2                    | non-essential                                       | conserved protein                                                  | 1.88                                                  |
| b0007                                             | yaaJ                                                               | Isolate 1                    | non-essential                                       | predicted transporter                                              | 0.00                                                  |
| b0007                                             | yaaJ                                                               | Isolate 2                    | non-essential                                       | predicted transporter                                              | 2.39                                                  |
| b0008                                             | talB                                                               | Isolate 1                    | non-essential                                       | transaldolase B                                                    | -1.39                                                 |
| b0008                                             | talB                                                               | Isolate 2                    | non-essential                                       | transaldolase B                                                    | -1.17                                                 |
| b0009                                             | mog                                                                | Isolate 1                    | non-essential                                       | predicted molybdochelatase                                         | 0.02                                                  |
| b0009                                             | mog                                                                | Isolate 2                    | non-essential                                       | predicted molybdochelatase                                         | 0.71                                                  |
| b0010                                             | yaaH                                                               | Isolate 1                    | non-essential                                       | conserved inner membrane protein associated with acetate transport | -1.90                                                 |
| b0010                                             | yaaH                                                               | Isolate 2                    | non-essential                                       | conserved inner membrane protein associated with acetate transport | -0.78                                                 |
| b0011                                             | yaaW                                                               | Isolate 1                    | non-essential                                       | conserved protein                                                  | 0.06                                                  |
| b0011                                             | yaaW                                                               | Isolate 2                    | non-essential                                       | conserved protein                                                  | -2.11                                                 |
| b0012                                             | htgA                                                               | Isolate 1                    | non-essential                                       | predicted protein                                                  | 1.34                                                  |
| b0012                                             | htgA                                                               | Isolate 2                    | non-essential                                       | predicted protein                                                  | -0.90                                                 |
| b0013                                             | yaaI                                                               | Isolate 1                    | non-essential                                       | predicted protein                                                  | -1.69                                                 |
| b0013                                             | yaaI                                                               | Isolate 2                    | non-essential                                       | predicted protein                                                  | -1.90                                                 |
| b0014                                             | dnaK                                                               | Isolate 1                    | non-essential                                       | chaperone Hsp70, co-chaperone with DnaJ                            | -1.99                                                 |
| b0014                                             | dnaK                                                               | Isolate 2                    | non-essential                                       | chaperone Hsp70, co-chaperone with DnaJ                            | 0.79                                                  |
| b0015                                             | dnaJ                                                               | Isolate 1                    | non-essential                                       | chaperone Hsp40, co-chaperone with DnaK                            | 1.71                                                  |
| b0015                                             | dnaJ                                                               | Isolate 2                    | non-essential                                       | chaperone Hsp40, co-chaperone with DnaK                            | 1.51                                                  |
| b0019                                             | nhaA                                                               | Isolate 1                    | non-essential                                       | sodium-proton antiporter                                           | 0.99                                                  |
| b0019                                             | nhaA                                                               | Isolate 2                    | non-essential                                       | sodium-proton antiporter                                           | 0.87                                                  |
| b0020                                             | nhaR                                                               | Isolate 1                    | non-essential                                       | DNA-binding transcriptional activator                              | -0.82                                                 |
| b0020                                             | nhaR                                                               | Isolate 2                    | non-essential                                       | DNA-binding transcriptional activator                              | 1.94                                                  |
| b0023                                             | rpsT                                                               | Isolate 1                    | non-essential                                       | 30S ribosomal subunit protein S20                                  | -0.27                                                 |
| b0023                                             | rpsT                                                               | Isolate 2                    | non-essential                                       | 30S ribosomal subunit protein S20                                  | 0.75                                                  |
| b0024                                             | yaaY                                                               | Isolate 1                    | non-essential                                       | predicted protein                                                  | -0.64                                                 |

|         |      |           |               |                                                                                                                  |       |
|---------|------|-----------|---------------|------------------------------------------------------------------------------------------------------------------|-------|
| b0024   | yaaY | Isolate 2 | non-essential | predicted protein                                                                                                | -1.10 |
| b0025   | ribF | Isolate 1 | essential     | bifunctional riboflavin kinase -!- FAD synthetase                                                                | -1.01 |
| b0026   | ileS | Isolate 1 | non-essential | isoleucyl-tRNA synthetase                                                                                        | -2.39 |
| b0026   | ileS | Isolate 2 | non-essential | isoleucyl-tRNA synthetase                                                                                        | 3.39  |
| b0028   | fkpB | Isolate 1 | non-essential | FKBP-type peptidyl-prolyl cis-trans isomerase (rotamase)                                                         | 0.87  |
| b0028   | fkpB | Isolate 2 | non-essential | FKBP-type peptidyl-prolyl cis-trans isomerase (rotamase)                                                         | 0.03  |
| b0029   | ispH | Isolate 1 | essential     | 1-hydroxy-2-methyl-2-(E)-butenyl 4-diphosphate reductase, 4Fe-4S protein                                         | 0.33  |
| b0030   | rihC | Isolate 1 | non-essential | ribonucleoside hydrolase 3                                                                                       | 0.99  |
| b0030   | rihC | Isolate 2 | non-essential | ribonucleoside hydrolase 3                                                                                       | 0.96  |
| b0032   | carA | Isolate 1 | non-essential | carbamoyl phosphate synthetase small subunit, glutamine amidotransferase                                         | -0.44 |
| b0032   | carA | Isolate 2 | non-essential | carbamoyl phosphate synthetase small subunit, glutamine amidotransferase                                         | -0.30 |
| b0033   | carB | Isolate 1 | non-essential | carbamoyl-phosphate synthase large subunit                                                                       | -4.81 |
| b0033   | carB | Isolate 2 | non-essential | carbamoyl-phosphate synthase large subunit                                                                       | -2.34 |
| b0033.1 | *    | Isolate 1 | *             | *                                                                                                                | 1.65  |
| b0033.1 | *    | Isolate 2 | *             | *                                                                                                                | -8.38 |
| b0034   | caiF | Isolate 1 | non-essential | DNA-binding transcriptional activator                                                                            | -1.45 |
| b0034   | caiF | Isolate 2 | non-essential | DNA-binding transcriptional activator                                                                            | 0.03  |
| b0035   | caiE | Isolate 1 | non-essential | predicted acyl transferase                                                                                       | 1.46  |
| b0035   | caiE | Isolate 2 | non-essential | predicted acyl transferase                                                                                       | -0.26 |
| b0036   | caiD | Isolate 1 | non-essential | crotonobetainyl CoA hydratase                                                                                    | -0.10 |
| b0036   | caiD | Isolate 2 | non-essential | crotonobetainyl CoA hydratase                                                                                    | -0.80 |
| b0037   | caiC | Isolate 1 | non-essential | predicted crotonobetaine CoA ligase:carnitine CoA ligase                                                         | 0.81  |
| b0037   | caiC | Isolate 2 | non-essential | predicted crotonobetaine CoA ligase:carnitine CoA ligase                                                         | 0.38  |
| b0038   | caiB | Isolate 1 | non-essential | crotonobetainyl CoA:carnitine CoA transferase                                                                    | 2.01  |
| b0038   | caiB | Isolate 2 | non-essential | crotonobetainyl CoA:carnitine CoA transferase                                                                    | 0.11  |
| b0039   | caiA | Isolate 1 | non-essential | crotonobetaine reductase subunit II, FAD-binding                                                                 | -1.72 |
| b0039   | caiA | Isolate 2 | non-essential | crotonobetaine reductase subunit II, FAD-binding                                                                 | 0.29  |
| b0040   | caiT | Isolate 1 | non-essential | predicted transporter                                                                                            | 1.87  |
| b0040   | caiT | Isolate 2 | non-essential | predicted transporter                                                                                            | -0.75 |
| b0041   | fixA | Isolate 1 | non-essential | predicted electron transfer flavoprotein subunit, ETFP adenine nucleotide-binding domain                         | -0.94 |
| b0041   | fixA | Isolate 2 | non-essential | predicted electron transfer flavoprotein subunit, ETFP adenine nucleotide-binding domain                         | -0.59 |
| b0042   | fixB | Isolate 1 | non-essential | predicted electron transfer flavoprotein, NAD/FAD-binding domain and ETFP adenine nucleotide-binding domain-like | -1.08 |
| b0042   | fixB | Isolate 2 | non-essential | predicted electron transfer flavoprotein, NAD/FAD-binding domain and ETFP adenine nucleotide-binding domain-like | -1.51 |
| b0043   | fixC | Isolate 1 | non-essential | predicted oxidoreductase, FAD/NAD(P)-binding domain                                                              | 0.58  |
| b0043   | fixC | Isolate 2 | non-essential | predicted oxidoreductase, FAD/NAD(P)-binding domain                                                              | -3.02 |
| b0044   | fixX | Isolate 1 | non-essential | predicted 4Fe-4S ferredoxin-type protein                                                                         | -0.22 |
| b0044   | fixX | Isolate 2 | non-essential | predicted 4Fe-4S ferredoxin-type protein                                                                         | -1.43 |
| b0045   | yaaU | Isolate 1 | non-essential | predicted transporter                                                                                            | -0.05 |
| b0045   | yaaU | Isolate 2 | non-essential | predicted transporter                                                                                            | 1.18  |
| b0046   | kefF | Isolate 1 | non-essential | flavoprotein subunit for the KefC potassium efflux system                                                        | -1.12 |
| b0046   | kefF | Isolate 2 | non-essential | flavoprotein subunit for the KefC potassium efflux system                                                        | -0.12 |
| b0047   | kefC | Isolate 1 | non-essential | potassium:proton antiporter                                                                                      | 0.14  |
| b0047   | kefC | Isolate 2 | non-essential | potassium:proton antiporter                                                                                      | -1.02 |

|       |      |           |               |                                                                                         |       |
|-------|------|-----------|---------------|-----------------------------------------------------------------------------------------|-------|
| b0048 | folA | Isolate 1 | essential     | dihydrofolate reductase                                                                 | -1.57 |
| b0049 | apaH | Isolate 1 | non-essential | diadenosine tetraphosphatase                                                            | 0.97  |
| b0049 | apaH | Isolate 2 | non-essential | diadenosine tetraphosphatase                                                            | -0.89 |
| b0050 | apaG | Isolate 1 | non-essential | protein associated with Co2+ and Mg2+ efflux                                            | -0.25 |
| b0050 | apaG | Isolate 2 | non-essential | protein associated with Co2+ and Mg2+ efflux                                            | -0.33 |
| b0051 | ksgA | Isolate 1 | non-essential | S-adenosylmethionine-6-N',N'-adenosyl (rRNA) dimethyltransferase                        | -1.25 |
| b0051 | ksgA | Isolate 2 | non-essential | S-adenosylmethionine-6-N',N'-adenosyl (rRNA) dimethyltransferase                        | -1.57 |
| b0052 | pdxA | Isolate 1 | non-essential | 4-hydroxy-L-threonine phosphate dehydrogenase, NAD-dependent                            | 0.03  |
| b0052 | pdxA | Isolate 2 | non-essential | 4-hydroxy-L-threonine phosphate dehydrogenase, NAD-dependent                            | -0.81 |
| b0053 | surA | Isolate 1 | non-essential | peptidyl-prolyl cis-trans isomerase (PPIase)                                            | 2.49  |
| b0053 | surA | Isolate 2 | non-essential | peptidyl-prolyl cis-trans isomerase (PPIase)                                            | 2.83  |
| b0055 | djlA | Isolate 1 | non-essential | DnaJ-like protein, membrane anchored                                                    | 0.16  |
| b0055 | djlA | Isolate 2 | non-essential | DnaJ-like protein, membrane anchored                                                    | -0.83 |
| b0056 | yabP | Isolate 1 | non-essential | predicted protein                                                                       | 0.00  |
| b0056 | yabP | Isolate 2 | non-essential | predicted protein                                                                       | 1.21  |
| b0058 | rluA | Isolate 1 | non-essential | pseudouridine synthase for 23S rRNA (position 746) and tRNAphe(position 32)             | 1.43  |
| b0058 | rluA | Isolate 2 | non-essential | pseudouridine synthase for 23S rRNA (position 746) and tRNAphe(position 32)             | -0.30 |
| b0059 | hepA | Isolate 1 | non-essential | RNA polymerase-associated helicase protein (ATPase and RNA polymerase recycling factor) | -1.33 |
| b0059 | hepA | Isolate 2 | non-essential | RNA polymerase-associated helicase protein (ATPase and RNA polymerase recycling factor) | 0.70  |
| b0060 | polB | Isolate 1 | non-essential | DNA polymerase II                                                                       | -0.54 |
| b0060 | polB | Isolate 2 | non-essential | DNA polymerase II                                                                       | 1.02  |
| b0064 | araC | Isolate 1 | non-essential | DNA-binding transcriptional dual regulator                                              | 2.47  |
| b0064 | araC | Isolate 2 | non-essential | DNA-binding transcriptional dual regulator                                              | 2.85  |
| b0065 | yabI | Isolate 1 | non-essential | conserved inner membrane protein                                                        | -1.77 |
| b0065 | yabI | Isolate 2 | non-essential | conserved inner membrane protein                                                        | -0.72 |
| b0066 | thiQ | Isolate 1 | non-essential | thiamin transporter subunit -!- ATP-binding component of ABC superfamily                | 0.19  |
| b0066 | thiQ | Isolate 2 | non-essential | thiamin transporter subunit -!- ATP-binding component of ABC superfamily                | -0.11 |
| b0067 | thiP | Isolate 1 | non-essential | fused subunits of thiamin transporter -!- membrane components of ABC superfamily        | 1.46  |
| b0067 | thiP | Isolate 2 | non-essential | fused subunits of thiamin transporter -!- membrane components of ABC superfamily        | -2.27 |
| b0068 | tbpA | Isolate 1 | non-essential | thiamin transporter subunit -!- periplasmic-binding component of ABC superfamily        | 1.66  |
| b0068 | tbpA | Isolate 2 | non-essential | thiamin transporter subunit -!- periplasmic-binding component of ABC superfamily        | 1.47  |
| b0069 | sgrR | Isolate 1 | non-essential | DNA-binding transcriptional regulator                                                   | 0.03  |
| b0069 | sgrR | Isolate 2 | non-essential | DNA-binding transcriptional regulator                                                   | -1.10 |
| b0070 | setA | Isolate 1 | non-essential | broad specificity sugar efflux system                                                   | 1.00  |
| b0070 | setA | Isolate 2 | non-essential | broad specificity sugar efflux system                                                   | -0.90 |
| b0071 | leuD | Isolate 1 | non-essential | 3-isopropylmalate isomerase subunit                                                     | -0.84 |
| b0071 | leuD | Isolate 2 | non-essential | 3-isopropylmalate isomerase subunit                                                     | 0.11  |
| b0072 | leuC | Isolate 1 | non-essential | 3-isopropylmalate isomerase subunit, dehydratase component                              | -0.70 |
| b0072 | leuC | Isolate 2 | non-essential | 3-isopropylmalate isomerase subunit, dehydratase component                              | 1.18  |
| b0073 | leuB | Isolate 1 | non-essential | 3-isopropylmalate dehydrogenase                                                         | 2.10  |
| b0073 | leuB | Isolate 2 | non-essential | 3-isopropylmalate dehydrogenase                                                         | -0.38 |
| b0074 | leuA | Isolate 1 | non-essential | 2-isopropylmalate synthase                                                              | -0.42 |
| b0074 | leuA | Isolate 2 | non-essential | 2-isopropylmalate synthase                                                              | 1.38  |

|       |      |           |               |                                                                                                     |        |
|-------|------|-----------|---------------|-----------------------------------------------------------------------------------------------------|--------|
| b0075 | leuL | Isolate 1 | non-essential | leu operon leader peptide                                                                           | 0.57   |
| b0075 | leuL | Isolate 2 | non-essential | leu operon leader peptide                                                                           | 1.06   |
| b0076 | leuO | Isolate 1 | non-essential | DNA-binding transcriptional activator                                                               | 0.35   |
| b0076 | leuO | Isolate 2 | non-essential | DNA-binding transcriptional activator                                                               | 1.65   |
| b0077 | ilvI | Isolate 1 | non-essential | acetolactate synthase III, large subunit                                                            | 1.33   |
| b0077 | ilvI | Isolate 2 | non-essential | acetolactate synthase III, large subunit                                                            | 1.35   |
| b0078 | ilvH | Isolate 1 | non-essential | acetolactate synthase III, thiamin-dependent, small subunit                                         | 1.22   |
| b0078 | ilvH | Isolate 2 | non-essential | acetolactate synthase III, thiamin-dependent, small subunit                                         | -0.70  |
| b0080 | fruR | Isolate 1 | non-essential | DNA-binding transcriptional dual regulator                                                          | -0.47  |
| b0080 | fruR | Isolate 2 | non-essential | DNA-binding transcriptional dual regulator                                                          | 0.72   |
| b0081 | mraZ | Isolate 1 | non-essential | conserved protein                                                                                   | 1.26   |
| b0081 | mraZ | Isolate 2 | non-essential | conserved protein                                                                                   | -1.17  |
| b0082 | mraW | Isolate 1 | non-essential | S-adenosyl-dependent methyltransferase activity on membrane-located substrates                      | 0.34   |
| b0082 | mraW | Isolate 2 | non-essential | S-adenosyl-dependent methyltransferase activity on membrane-located substrates                      | 0.77   |
| b0085 | murE | Isolate 1 | essential     | UDP-N-acetylmuramoyl-L-alanyl-D-glutamate:meso-diaminopimelate ligase                               | -0.48  |
| b0086 | murF | Isolate 1 | essential     | UDP-N-acetylmuramoyl-tripeptide:D-alanyl-D-alanine ligase                                           | -0.48  |
| b0088 | murD | Isolate 1 | essential     | UDP-N-acetylmuramoyl-L-alanine:D-glutamate ligase                                                   | 0.58   |
| b0090 | murG | Isolate 1 | essential     | N-acetylglucosaminyl transferase                                                                    | 0.74   |
| b0091 | murC | Isolate 1 | essential     | UDP-N-acetylmuramate:L-alanine ligase                                                               | -1.70  |
| b0094 | ftsA | Isolate 1 | essential     | ATP-binding cell division protein involved in recruitment of FtsK to Z ring                         | 0.54   |
| b0095 | ftsZ | Isolate 1 | essential     | GTP-binding tubulin-like cell division protein                                                      | 0.74   |
| b0096 | lpxC | Isolate 1 | essential     | UDP-3-O-acyl N-acetylglucosamine deacetylase                                                        | 1.74   |
| b0098 | secA | Isolate 1 | essential     | preprotein translocase subunit, ATPase that targets protein precursors to the SecYE core translocon | 0.74   |
| b0099 | mutT | Isolate 1 | non-essential | nucleoside triphosphate pyrophosphohydrolase, marked preference for dGTP                            | -1.37  |
| b0099 | mutT | Isolate 2 | non-essential | nucleoside triphosphate pyrophosphohydrolase, marked preference for dGTP                            | -0.85  |
| b0101 | yacG | Isolate 1 | non-essential | conserved protein                                                                                   | 0.40   |
| b0101 | yacG | Isolate 2 | non-essential | conserved protein                                                                                   | -0.12  |
| b0102 | yacF | Isolate 1 | non-essential | conserved protein                                                                                   | -1.61  |
| b0102 | yacF | Isolate 2 | non-essential | conserved protein                                                                                   | -1.89  |
| b0103 | coaE | Isolate 1 | non-essential | dephospho-CoA kinase                                                                                | -2.01  |
| b0103 | coaE | Isolate 2 | non-essential | dephospho-CoA kinase                                                                                | -1.62  |
| b0104 | guaC | Isolate 1 | non-essential | GMP reductase                                                                                       | 0.18   |
| b0104 | guaC | Isolate 2 | non-essential | GMP reductase                                                                                       | -1.57  |
| b0106 | hofC | Isolate 1 | non-essential | assembly protein in type IV pilin biogenesis, transmembrane protein                                 | 0.36   |
| b0106 | hofC | Isolate 2 | non-essential | assembly protein in type IV pilin biogenesis, transmembrane protein                                 | -1.10  |
| b0107 | hofB | Isolate 1 | non-essential | conserved protein with nucleoside triphosphate hydrolase domain                                     | -0.96  |
| b0107 | hofB | Isolate 2 | non-essential | conserved protein with nucleoside triphosphate hydrolase domain                                     | 0.23   |
| b0108 | ppdD | Isolate 1 | non-essential | predicted major pilin subunit                                                                       | -0.86  |
| b0108 | ppdD | Isolate 2 | non-essential | predicted major pilin subunit                                                                       | -12.77 |
| b0109 | nadC | Isolate 1 | non-essential | quinolinate phosphoribosyltransferase                                                               | -1.42  |
| b0109 | nadC | Isolate 2 | non-essential | quinolinate phosphoribosyltransferase                                                               | -2.06  |
| b0110 | ampD | Isolate 1 | non-essential | N-acetyl-anhydromuranmyl-L-alanine amidase                                                          | -0.90  |
| b0110 | ampD | Isolate 2 | non-essential | N-acetyl-anhydromuranmyl-L-alanine amidase                                                          | -0.43  |

|       |      |           |               |                                                                            |        |
|-------|------|-----------|---------------|----------------------------------------------------------------------------|--------|
| b0111 | ampE | Isolate 1 | non-essential | predicted inner membrane protein                                           | -0.04  |
| b0111 | ampE | Isolate 2 | non-essential | predicted inner membrane protein                                           | 0.84   |
| b0112 | aroP | Isolate 1 | non-essential | aromatic amino acid transporter                                            | 0.27   |
| b0112 | aroP | Isolate 2 | non-essential | aromatic amino acid transporter                                            | -0.09  |
| b0113 | pdhR | Isolate 1 | non-essential | DNA-binding transcriptional dual regulator                                 | 1.33   |
| b0113 | pdhR | Isolate 2 | non-essential | DNA-binding transcriptional dual regulator                                 | 0.76   |
| b0114 | aceE | Isolate 1 | non-essential | pyruvate dehydrogenase, decarboxylase component E1, thiamin-binding        | -0.52  |
| b0114 | aceE | Isolate 2 | non-essential | pyruvate dehydrogenase, decarboxylase component E1, thiamin-binding        | -0.62  |
| b0115 | aceF | Isolate 1 | non-essential | pyruvate dehydrogenase, dihydrolipoyltransacetylase component E2           | 0.65   |
| b0115 | aceF | Isolate 2 | non-essential | pyruvate dehydrogenase, dihydrolipoyltransacetylase component E2           | 1.33   |
| b0116 | lpd  | Isolate 1 | non-essential | lipoamide dehydrogenase, E3 component is part of three enzyme complexes    | -10.76 |
| b0116 | lpd  | Isolate 2 | non-essential | lipoamide dehydrogenase, E3 component is part of three enzyme complexes    | 0.66   |
| b0117 | yacH | Isolate 1 | non-essential | predicted protein                                                          | 0.17   |
| b0117 | yacH | Isolate 2 | non-essential | predicted protein                                                          | -0.85  |
| b0118 | acnB | Isolate 1 | non-essential | bifunctional aconitate hydratase 2 -!- 2-methylisocitrate dehydratase      | -9.58  |
| b0118 | acnB | Isolate 2 | non-essential | bifunctional aconitate hydratase 2 -!- 2-methylisocitrate dehydratase      | 0.97   |
| b0119 | yacL | Isolate 1 | non-essential | conserved protein                                                          | -0.18  |
| b0119 | yacL | Isolate 2 | non-essential | conserved protein                                                          | 0.89   |
| b0120 | speD | Isolate 1 | non-essential | S-adenosylmethionine decarboxylase                                         | 1.84   |
| b0120 | speD | Isolate 2 | non-essential | S-adenosylmethionine decarboxylase                                         | 0.57   |
| b0121 | speE | Isolate 1 | non-essential | spermidine synthase (putrescine aminopropyltransferase)                    | 0.13   |
| b0121 | speE | Isolate 2 | non-essential | spermidine synthase (putrescine aminopropyltransferase)                    | -0.31  |
| b0122 | yacC | Isolate 1 | non-essential | predicted protein                                                          | -1.17  |
| b0122 | yacC | Isolate 2 | non-essential | predicted protein                                                          | -1.55  |
| b0123 | cueO | Isolate 1 | non-essential | multicopper oxidase (laccase)                                              | 0.92   |
| b0123 | cueO | Isolate 2 | non-essential | multicopper oxidase (laccase)                                              | 1.76   |
| b0124 | gcd  | Isolate 1 | non-essential | glucose dehydrogenase                                                      | 0.09   |
| b0124 | gcd  | Isolate 2 | non-essential | glucose dehydrogenase                                                      | 1.63   |
| b0125 | hpt  | Isolate 1 | non-essential | hypoxanthine phosphoribosyltransferase                                     | 0.79   |
| b0125 | hpt  | Isolate 2 | non-essential | hypoxanthine phosphoribosyltransferase                                     | -0.81  |
| b0126 | can  | Isolate 1 | essential     | carbonic anhydrase                                                         | 2.48   |
| b0127 | yadG | Isolate 1 | non-essential | predicted transporter subunit -!- ATP-binding component of ABC superfamily | -0.48  |
| b0127 | yadG | Isolate 2 | non-essential | predicted transporter subunit -!- ATP-binding component of ABC superfamily | -1.88  |
| b0128 | yadH | Isolate 1 | non-essential | predicted transporter subunit -!- membrane component of ABC superfamily    | 0.89   |
| b0128 | yadH | Isolate 2 | non-essential | predicted transporter subunit -!- membrane component of ABC superfamily    | 0.24   |
| b0129 | yadI | Isolate 1 | non-essential | predicted PTS Enzyme IIA                                                   | 0.28   |
| b0129 | yadI | Isolate 2 | non-essential | predicted PTS Enzyme IIA                                                   | -1.27  |
| b0130 | yadE | Isolate 1 | non-essential | predicted polysaccharide deacetylase lipoprotein                           | 0.74   |
| b0130 | yadE | Isolate 2 | non-essential | predicted polysaccharide deacetylase lipoprotein                           | 1.17   |
| b0131 | panD | Isolate 1 | non-essential | aspartate 1-decarboxylase                                                  | -0.55  |
| b0131 | panD | Isolate 2 | non-essential | aspartate 1-decarboxylase                                                  | 0.48   |
| b0132 | yadD | Isolate 1 | non-essential | predicted transposase                                                      | -0.28  |
| b0132 | yadD | Isolate 2 | non-essential | predicted transposase                                                      | -2.13  |

|       |      |           |               |                                                                                                       |       |
|-------|------|-----------|---------------|-------------------------------------------------------------------------------------------------------|-------|
| b0133 | panC | Isolate 1 | non-essential | pantothenate synthetase                                                                               | 0.06  |
| b0133 | panC | Isolate 2 | non-essential | pantothenate synthetase                                                                               | 1.19  |
| b0134 | panB | Isolate 1 | non-essential | 3-methyl-2-oxobutanoate hydroxymethyltransferase                                                      | -1.68 |
| b0134 | panB | Isolate 2 | non-essential | 3-methyl-2-oxobutanoate hydroxymethyltransferase                                                      | -1.04 |
| b0135 | yadC | Isolate 1 | non-essential | predicted fimbrial-like adhesin protein                                                               | -0.98 |
| b0135 | yadC | Isolate 2 | non-essential | predicted fimbrial-like adhesin protein                                                               | -2.16 |
| b0136 | yadK | Isolate 1 | non-essential | predicted fimbrial-like adhesin protein                                                               | -1.97 |
| b0136 | yadK | Isolate 2 | non-essential | predicted fimbrial-like adhesin protein                                                               | -0.98 |
| b0137 | yadL | Isolate 1 | non-essential | predicted fimbrial-like adhesin protein                                                               | -1.06 |
| b0137 | yadL | Isolate 2 | non-essential | predicted fimbrial-like adhesin protein                                                               | 0.30  |
| b0138 | yadM | Isolate 1 | non-essential | predicted fimbrial-like adhesin protein                                                               | 0.72  |
| b0138 | yadM | Isolate 2 | non-essential | predicted fimbrial-like adhesin protein                                                               | 0.05  |
| b0139 | htrE | Isolate 1 | non-essential | predicted outer membrane usher protein                                                                | -0.77 |
| b0139 | htrE | Isolate 2 | non-essential | predicted outer membrane usher protein                                                                | 0.62  |
| b0140 | ecpD | Isolate 1 | non-essential | predicted periplasmic pilin chaperone                                                                 | 2.61  |
| b0140 | ecpD | Isolate 2 | non-essential | predicted periplasmic pilin chaperone                                                                 | -0.41 |
| b0141 | yadN | Isolate 1 | non-essential | predicted fimbrial-like adhesin protein                                                               | -1.14 |
| b0141 | yadN | Isolate 2 | non-essential | predicted fimbrial-like adhesin protein                                                               | -2.22 |
| b0143 | pcnB | Isolate 1 | non-essential | poly(A) polymerase I                                                                                  | -1.17 |
| b0143 | pcnB | Isolate 2 | non-essential | poly(A) polymerase I                                                                                  | 0.14  |
| b0144 | yadB | Isolate 1 | non-essential | glutamyl-Q tRNA(Asp) synthetase                                                                       | 0.11  |
| b0144 | yadB | Isolate 2 | non-essential | glutamyl-Q tRNA(Asp) synthetase                                                                       | 0.26  |
| b0145 | dksA | Isolate 1 | non-essential | transcriptional regulator of rRNA transcription, DnaK suppressor protein                              | 0.79  |
| b0145 | dksA | Isolate 2 | non-essential | transcriptional regulator of rRNA transcription, DnaK suppressor protein                              | 1.08  |
| b0146 | sfsA | Isolate 1 | non-essential | predicted DNA-binding transcriptional regulator                                                       | 1.77  |
| b0146 | sfsA | Isolate 2 | non-essential | predicted DNA-binding transcriptional regulator                                                       | -2.15 |
| b0147 | ligT | Isolate 1 | non-essential | 2'-5' RNA ligase                                                                                      | 1.62  |
| b0147 | ligT | Isolate 2 | non-essential | 2'-5' RNA ligase                                                                                      | 0.72  |
| b0148 | hrpB | Isolate 1 | non-essential | predicted ATP-dependent helicase                                                                      | -0.98 |
| b0148 | hrpB | Isolate 2 | non-essential | predicted ATP-dependent helicase                                                                      | -0.24 |
| b0149 | mrcB | Isolate 1 | non-essential | fused glycosyl transferase -!- transpeptidase                                                         | -1.89 |
| b0149 | mrcB | Isolate 2 | non-essential | fused glycosyl transferase -!- transpeptidase                                                         | -0.23 |
| b0150 | fhuA | Isolate 1 | non-essential | ferrichrome outer membrane transporter                                                                | -1.88 |
| b0150 | fhuA | Isolate 2 | non-essential | ferrichrome outer membrane transporter                                                                | -2.50 |
| b0151 | fhuC | Isolate 1 | non-essential | iron-hydroxamate transporter subunit -!- ATP-binding component of ABC superfamily                     | -0.98 |
| b0151 | fhuC | Isolate 2 | non-essential | iron-hydroxamate transporter subunit -!- ATP-binding component of ABC superfamily                     | 0.99  |
| b0152 | fhuD | Isolate 1 | non-essential | iron-hydroxamate transporter subunit -!- periplasmic-binding component of ABC superfamily             | 0.93  |
| b0152 | fhuD | Isolate 2 | non-essential | iron-hydroxamate transporter subunit -!- periplasmic-binding component of ABC superfamily             | 1.09  |
| b0153 | fhuB | Isolate 1 | non-essential | fused subunits of iron-hydroxamate transporter -!- membrane components of ABC superfamily transporter | -0.30 |
| b0153 | fhuB | Isolate 2 | non-essential | fused subunits of iron-hydroxamate transporter -!- membrane components of ABC superfamily transporter | -0.61 |
| b0155 | clcA | Isolate 1 | non-essential | chloride channel, voltage-gated                                                                       | 0.26  |
| b0155 | clcA | Isolate 2 | non-essential | chloride channel, voltage-gated                                                                       | -1.32 |
| b0156 | yadR | Isolate 1 | essential     | conserved protein                                                                                     | -0.96 |

|       |      |           |               |                                                                                      |        |
|-------|------|-----------|---------------|--------------------------------------------------------------------------------------|--------|
| b0157 | yadS | Isolate 1 | non-essential | conserved inner membrane protein                                                     | -13.68 |
| b0157 | yadS | Isolate 2 | non-essential | conserved inner membrane protein                                                     | -0.42  |
| b0158 | btuF | Isolate 1 | non-essential | vitamin B12 transporter subunit -!- periplasmic-binding component of ABC superfamily | -0.40  |
| b0158 | btuF | Isolate 2 | non-essential | vitamin B12 transporter subunit -!- periplasmic-binding component of ABC superfamily | -2.50  |
| b0159 | pfs  | Isolate 1 | non-essential | 5'-methylthioadenosine/S-adenosylhomocysteine nucleosidase                           | -0.04  |
| b0159 | pfs  | Isolate 2 | non-essential | 5'-methylthioadenosine/S-adenosylhomocysteine nucleosidase                           | -0.90  |
| b0160 | dgt  | Isolate 1 | non-essential | deoxyguanosine triphosphate triphosphohydrolase                                      | 2.23   |
| b0160 | dgt  | Isolate 2 | non-essential | deoxyguanosine triphosphate triphosphohydrolase                                      | 1.80   |
| b0161 | degP | Isolate 1 | non-essential | serine endoprotease (protease Do), membrane-associated                               | 0.29   |
| b0161 | degP | Isolate 2 | non-essential | serine endoprotease (protease Do), membrane-associated                               | -1.59  |
| b0162 | cdaR | Isolate 1 | non-essential | DNA-binding transcriptional regulator                                                | -0.16  |
| b0162 | cdaR | Isolate 2 | non-essential | DNA-binding transcriptional regulator                                                | -1.36  |
| b0163 | yaeH | Isolate 1 | non-essential | conserved protein                                                                    | 0.61   |
| b0163 | yaeH | Isolate 2 | non-essential | conserved protein                                                                    | -0.99  |
| b0164 | yaeI | Isolate 1 | non-essential | predicted phosphatase                                                                | 0.08   |
| b0164 | yaeI | Isolate 2 | non-essential | predicted phosphatase                                                                | 0.60   |
| b0167 | glnD | Isolate 1 | non-essential | uridylyltransferase                                                                  | -0.76  |
| b0167 | glnD | Isolate 2 | non-essential | uridylyltransferase                                                                  | -1.00  |
| b0168 | map  | Isolate 1 | essential     | methionine aminopeptidase                                                            | 2.40   |
| b0170 | tsf  | Isolate 1 | essential     | protein chain elongation factor EF-Ts                                                | -1.04  |
| b0171 | pyrH | Isolate 1 | essential     | uridylyltransferase                                                                  | -0.64  |
| b0172 | frf  | Isolate 1 | essential     | ribosome recycling factor                                                            | 3.80   |
| b0174 | ispU | Isolate 1 | essential     | undecaprenyl pyrophosphate synthase                                                  | 1.15   |
| b0177 | yaeT | Isolate 1 | essential     | conserved protein                                                                    | 2.35   |
| b0178 | hlpA | Isolate 1 | non-essential | periplasmic chaperone                                                                | 1.14   |
| b0178 | hlpA | Isolate 2 | non-essential | periplasmic chaperone                                                                | 1.59   |
| b0179 | lpxD | Isolate 1 | essential     | UDP-3-O-(3-hydroxymyristoyl)-glucosamine N-acyltransferase                           | 2.26   |
| b0180 | fabZ | Isolate 1 | essential     | (3R)-hydroxymyristol acyl carrier protein dehydratase                                | 3.39   |
| b0181 | lpxA | Isolate 1 | essential     | UDP-N-acetylglucosamine acetyltransferase                                            | 4.33   |
| b0182 | lpxB | Isolate 1 | essential     | tetraacyldisaccharide-1-P synthase                                                   | 1.15   |
| b0183 | rnhB | Isolate 1 | non-essential | ribonuclease HII, degrades RNA of DNA-RNA hybrids                                    | -0.54  |
| b0183 | rnhB | Isolate 2 | non-essential | ribonuclease HII, degrades RNA of DNA-RNA hybrids                                    | 0.36   |
| b0184 | dnaE | Isolate 1 | essential     | DNA polymerase III alpha subunit                                                     | 0.70   |
| b0186 | ldcC | Isolate 1 | non-essential | lysine decarboxylase 2, constitutive                                                 | 0.73   |
| b0186 | ldcC | Isolate 2 | non-essential | lysine decarboxylase 2, constitutive                                                 | -0.26  |
| b0187 | yaeR | Isolate 1 | non-essential | predicted lyase                                                                      | 0.60   |
| b0187 | yaeR | Isolate 2 | non-essential | predicted lyase                                                                      | 1.46   |
| b0189 | rof  | Isolate 1 | non-essential | modulator of Rho-dependent transcription termination                                 | 2.18   |
| b0189 | rof  | Isolate 2 | non-essential | modulator of Rho-dependent transcription termination                                 | 0.13   |
| b0190 | yaeQ | Isolate 1 | non-essential | conserved protein                                                                    | -0.50  |
| b0190 | yaeQ | Isolate 2 | non-essential | conserved protein                                                                    | -1.69  |
| b0191 | yaeJ | Isolate 1 | non-essential | conserved protein                                                                    | 0.52   |
| b0191 | yaeJ | Isolate 2 | non-essential | conserved protein                                                                    | -0.36  |



|       |      |           |               |                                                                                        |       |
|-------|------|-----------|---------------|----------------------------------------------------------------------------------------|-------|
| b0192 | nlpE | Isolate 1 | non-essential | lipoprotein involved with copper homeostasis and adhesion                              | 1.46  |
| b0192 | nlpE | Isolate 2 | non-essential | lipoprotein involved with copper homeostasis and adhesion                              | -2.18 |
| b0193 | yaeF | Isolate 1 | non-essential | predicted lipoprotein                                                                  | 0.90  |
| b0193 | yaeF | Isolate 2 | non-essential | predicted lipoprotein                                                                  | -0.38 |
| b0194 | proS | Isolate 1 | essential     | prolyl-tRNA synthetase                                                                 | 1.17  |
| b0195 | yaeB | Isolate 1 | non-essential | conserved protein                                                                      | -1.47 |
| b0195 | yaeB | Isolate 2 | non-essential | conserved protein                                                                      | 0.13  |
| b0196 | rscF | Isolate 1 | non-essential | predicted outer membrane protein, signal                                               | -0.83 |
| b0196 | rscF | Isolate 2 | non-essential | predicted outer membrane protein, signal                                               | 0.01  |
| b0197 | metQ | Isolate 1 | non-essential | DL-methionine transporter subunit -!- periplasmic-binding component of ABC superfamily | 0.68  |
| b0197 | metQ | Isolate 2 | non-essential | DL-methionine transporter subunit -!- periplasmic-binding component of ABC superfamily | 0.17  |
| b0198 | metI | Isolate 1 | non-essential | DL-methionine transporter subunit -!- membrane component protein of ABC superfamily    | -1.96 |
| b0198 | metI | Isolate 2 | non-essential | DL-methionine transporter subunit -!- membrane component protein of ABC superfamily    | 0.05  |
| b0199 | metN | Isolate 1 | non-essential | DL-methionine transporter subunit -!- ATP-binding component of ABC superfamily         | 0.73  |
| b0199 | metN | Isolate 2 | non-essential | DL-methionine transporter subunit -!- ATP-binding component of ABC superfamily         | -1.20 |
| b0200 | gmhB | Isolate 1 | non-essential | D,D-heptose 1,7-bisphosphate phosphatase                                               | -1.77 |
| b0200 | gmhB | Isolate 2 | non-essential | D,D-heptose 1,7-bisphosphate phosphatase                                               | 0.11  |
| b0207 | dkgB | Isolate 1 | non-essential | 2,5-diketo-D-gluconate reductase B                                                     | 0.19  |
| b0207 | dkgB | Isolate 2 | non-essential | 2,5-diketo-D-gluconate reductase B                                                     | 1.87  |
| b0208 | yafC | Isolate 1 | non-essential | predicted DNA-binding transcriptional regulator                                        | -0.67 |
| b0208 | yafC | Isolate 2 | non-essential | predicted DNA-binding transcriptional regulator                                        | -0.05 |
| b0209 | yafD | Isolate 1 | non-essential | conserved protein                                                                      | -0.08 |
| b0209 | yafD | Isolate 2 | non-essential | conserved protein                                                                      | 0.88  |
| b0210 | yafE | Isolate 1 | non-essential | predicted S-adenosyl-L-methionine-dependent methyltransferase                          | -0.61 |
| b0210 | yafE | Isolate 2 | non-essential | predicted S-adenosyl-L-methionine-dependent methyltransferase                          | 1.29  |
| b0211 | mltD | Isolate 1 | non-essential | predicted membrane-bound lytic murein transglycosylase D                               | 1.76  |
| b0211 | mltD | Isolate 2 | non-essential | predicted membrane-bound lytic murein transglycosylase D                               | 3.00  |
| b0212 | gloB | Isolate 1 | non-essential | predicted hydroxyacylglutathione hydrolase                                             | -1.89 |
| b0212 | gloB | Isolate 2 | non-essential | predicted hydroxyacylglutathione hydrolase                                             | -1.02 |
| b0213 | yafS | Isolate 1 | non-essential | predicted S-adenosyl-L-methionine-dependent methyltransferase                          | 0.42  |
| b0213 | yafS | Isolate 2 | non-essential | predicted S-adenosyl-L-methionine-dependent methyltransferase                          | 1.42  |
| b0214 | rnhA | Isolate 1 | non-essential | ribonuclease HI, degrades RNA of DNA-RNA hybrids                                       | 1.59  |
| b0214 | rnhA | Isolate 2 | non-essential | ribonuclease HI, degrades RNA of DNA-RNA hybrids                                       | 1.27  |
| b0215 | dnaQ | Isolate 1 | non-essential | DNA polymerase III epsilon subunit                                                     | -0.17 |
| b0215 | dnaQ | Isolate 2 | non-essential | DNA polymerase III epsilon subunit                                                     | 0.90  |
| b0217 | yafT | Isolate 1 | non-essential | predicted aminopeptidase                                                               | -2.00 |
| b0217 | yafT | Isolate 2 | non-essential | predicted aminopeptidase                                                               | -0.43 |
| b0218 | yafU | Isolate 1 | non-essential | predicted inner membrane protein                                                       | 1.78  |
| b0218 | yafU | Isolate 2 | non-essential | predicted inner membrane protein                                                       | 0.24  |
| b0219 | yafV | Isolate 1 | non-essential | predicted C-N hydrolase family amidase, NAD(P)-binding                                 | 0.37  |
| b0219 | yafV | Isolate 2 | non-essential | predicted C-N hydrolase family amidase, NAD(P)-binding                                 | 0.53  |
| b0220 | ivy  | Isolate 1 | non-essential | inhibitor of vertebrate C-lysozyme                                                     | 0.48  |
| b0220 | ivy  | Isolate 2 | non-essential | inhibitor of vertebrate C-lysozyme                                                     | -0.30 |

|       |      |           |               |                                                                  |       |
|-------|------|-----------|---------------|------------------------------------------------------------------|-------|
| b0221 | fadE | Isolate 1 | non-essential | acyl coenzyme A dehydrogenase                                    | -0.79 |
| b0221 | fadE | Isolate 2 | non-essential | acyl coenzyme A dehydrogenase                                    | 0.48  |
| b0222 | lpcA | Isolate 1 | non-essential | D-sedoheptulose 7-phosphate isomerase                            | -2.06 |
| b0222 | lpcA | Isolate 2 | non-essential | D-sedoheptulose 7-phosphate isomerase                            | -2.04 |
| b0223 | yafJ | Isolate 1 | non-essential | predicted amidotransferase                                       | 0.77  |
| b0223 | yafJ | Isolate 2 | non-essential | predicted amidotransferase                                       | 2.09  |
| b0224 | yafK | Isolate 1 | non-essential | conserved protein                                                | 0.69  |
| b0224 | yafK | Isolate 2 | non-essential | conserved protein                                                | -1.56 |
| b0225 | yafQ | Isolate 1 | non-essential | predicted toxin of the YafQ-DinJ toxin-antitoxin system          | 0.10  |
| b0225 | yafQ | Isolate 2 | non-essential | predicted toxin of the YafQ-DinJ toxin-antitoxin system          | -0.56 |
| b0226 | dinJ | Isolate 1 | non-essential | predicted antitoxin of YafQ-DinJ toxin-antitoxin system          | 0.47  |
| b0226 | dinJ | Isolate 2 | non-essential | predicted antitoxin of YafQ-DinJ toxin-antitoxin system          | 0.59  |
| b0227 | yafL | Isolate 1 | non-essential | predicted lipoprotein and C40 family peptidase                   | 0.69  |
| b0227 | yafL | Isolate 2 | non-essential | predicted lipoprotein and C40 family peptidase                   | -0.05 |
| b0228 | yafM | Isolate 1 | non-essential | conserved protein                                                | -1.88 |
| b0228 | yafM | Isolate 2 | non-essential | conserved protein                                                | -0.79 |
| b0229 | fhiA | Isolate 1 | *             | flagellar system protein, promoterless fragment (pseudogene)     | -4.08 |
| b0229 | fhiA | Isolate 2 | *             | flagellar system protein, promoterless fragment (pseudogene)     | 1.16  |
| b0230 | mbhA | Isolate 1 | *             | flagellar system protein, promoterless fragment (pseudogene)     | 0.63  |
| b0230 | mbhA | Isolate 2 | *             | flagellar system protein, promoterless fragment (pseudogene)     | -0.58 |
| b0231 | dinB | Isolate 1 | non-essential | DNA polymerase IV                                                | 3.74  |
| b0231 | dinB | Isolate 2 | non-essential | DNA polymerase IV                                                | 0.62  |
| b0232 | yafN | Isolate 1 | non-essential | predicted antitoxin of the YafO-YafN toxin-antitoxin system      | 1.25  |
| b0232 | yafN | Isolate 2 | non-essential | predicted antitoxin of the YafO-YafN toxin-antitoxin system      | 5.58  |
| b0233 | yafO | Isolate 1 | non-essential | predicted toxin of the YafO-YafN toxin-antitoxin system          | 1.11  |
| b0233 | yafO | Isolate 2 | non-essential | predicted toxin of the YafO-YafN toxin-antitoxin system          | -0.76 |
| b0234 | yafP | Isolate 1 | non-essential | predicted acyltransferase with acyl-CoA N-acyltransferase domain | -1.09 |
| b0234 | yafP | Isolate 2 | non-essential | predicted acyltransferase with acyl-CoA N-acyltransferase domain | -0.71 |
| b0235 | ykfJ | Isolate 1 | non-essential | conserved protein                                                | -2.21 |
| b0235 | ykfJ | Isolate 2 | non-essential | conserved protein                                                | 1.73  |
| b0236 | prfH | Isolate 1 | non-essential | predicted peptide chain release factor                           | 1.29  |
| b0236 | prfH | Isolate 2 | non-essential | predicted peptide chain release factor                           | -0.06 |
| b0237 | pepD | Isolate 1 | non-essential | aminoacyl-histidine dipeptidase (peptidase D)                    | 0.86  |
| b0237 | pepD | Isolate 2 | non-essential | aminoacyl-histidine dipeptidase (peptidase D)                    | -0.44 |
| b0238 | gpt  | Isolate 1 | non-essential | guanine-hypoxanthine phosphoribosyltransferase                   | 1.38  |
| b0238 | gpt  | Isolate 2 | non-essential | guanine-hypoxanthine phosphoribosyltransferase                   | 2.07  |
| b0239 | frsA | Isolate 1 | non-essential | hydrolase, binds to enzyme IIA(Glc)                              | -0.14 |
| b0239 | frsA | Isolate 2 | non-essential | hydrolase, binds to enzyme IIA(Glc)                              | 0.39  |
| b0240 | crl  | Isolate 1 | non-essential | DNA-binding transcriptional regulator                            | -1.45 |
| b0240 | crl  | Isolate 2 | non-essential | DNA-binding transcriptional regulator                            | -0.01 |
| b0241 | phoE | Isolate 1 | non-essential | outer membrane phosphoprotein E                                  | -0.20 |
| b0241 | phoE | Isolate 2 | non-essential | outer membrane phosphoprotein E                                  | -2.10 |
| b0242 | proB | Isolate 1 | non-essential | gamma-glutamate kinase                                           | 0.06  |

|       |      |           |               |                                                                                                   |       |
|-------|------|-----------|---------------|---------------------------------------------------------------------------------------------------|-------|
| b0242 | proB | Isolate 2 | non-essential | gamma-glutamate kinase                                                                            | 0.30  |
| b0243 | proA | Isolate 1 | non-essential | gamma-glutamylphosphate reductase                                                                 | 3.04  |
| b0243 | proA | Isolate 2 | non-essential | gamma-glutamylphosphate reductase                                                                 | 3.12  |
| b0245 | ykfI | Isolate 1 | non-essential | CP4-6 prophage; toxin of the YkfI-YafW toxin-antitoxin system                                     | 3.75  |
| b0245 | ykfI | Isolate 2 | non-essential | CP4-6 prophage; toxin of the YkfI-YafW toxin-antitoxin system                                     | 0.89  |
| b0246 | yafW | Isolate 1 | non-essential | CP4-6 prophage; antitoxin of the YkfI-YafW toxin-antitoxin system                                 | -0.88 |
| b0246 | yafW | Isolate 2 | non-essential | CP4-6 prophage; antitoxin of the YkfI-YafW toxin-antitoxin system                                 | -2.42 |
| b0247 | ykfG | Isolate 1 | non-essential | CP4-6 prophage; predicted DNA repair protein                                                      | 0.26  |
| b0247 | ykfG | Isolate 2 | non-essential | CP4-6 prophage; predicted DNA repair protein                                                      | -1.79 |
| b0248 | yafX | Isolate 1 | non-essential | CP4-6 prophage; predicted protein                                                                 | -0.35 |
| b0248 | yafX | Isolate 2 | non-essential | CP4-6 prophage; predicted protein                                                                 | -0.88 |
| b0249 | ykfF | Isolate 1 | non-essential | CP4-6 prophage; predicted protein                                                                 | -0.35 |
| b0249 | ykfF | Isolate 2 | non-essential | CP4-6 prophage; predicted protein                                                                 | -0.15 |
| b0250 | ykfB | Isolate 1 | non-essential | CP4-6 prophage; predicted protein                                                                 | -0.11 |
| b0250 | ykfB | Isolate 2 | non-essential | CP4-6 prophage; predicted protein                                                                 | -0.47 |
| b0251 | yafY | Isolate 1 | non-essential | CP4-6 prophage; predicted DNA-binding transcriptional regulator                                   | 3.70  |
| b0251 | yafY | Isolate 2 | non-essential | CP4-6 prophage; predicted DNA-binding transcriptional regulator                                   | 1.24  |
| b0252 | yafZ | Isolate 1 | non-essential | CP4-6 prophage; conserved protein                                                                 | -2.30 |
| b0252 | yafZ | Isolate 2 | non-essential | CP4-6 prophage; conserved protein                                                                 | 2.43  |
| b0253 | ykfA | Isolate 1 | non-essential | CP4-6 prophage; predicted GTP-binding protein                                                     | -1.41 |
| b0253 | ykfA | Isolate 2 | non-essential | CP4-6 prophage; predicted GTP-binding protein                                                     | -0.71 |
| b0254 | perR | Isolate 1 | non-essential | CP4-6 prophage; predicted DNA-binding transcriptional regulator                                   | 0.69  |
| b0254 | perR | Isolate 2 | non-essential | CP4-6 prophage; predicted DNA-binding transcriptional regulator                                   | 1.08  |
| b0258 | ykfC | Isolate 1 | non-essential | CP4-6 prophage; conserved protein                                                                 | -0.36 |
| b0258 | ykfC | Isolate 2 | non-essential | CP4-6 prophage; conserved protein                                                                 | 0.88  |
| b0260 | mmuP | Isolate 1 | non-essential | CP4-6 prophage; predicted S-methylmethionine transporter                                          | 1.26  |
| b0260 | mmuP | Isolate 2 | non-essential | CP4-6 prophage; predicted S-methylmethionine transporter                                          | 2.56  |
| b0261 | mmuM | Isolate 1 | non-essential | CP4-6 prophage; S-methylmethionine:homocysteine methyltransferase                                 | -1.84 |
| b0261 | mmuM | Isolate 2 | non-essential | CP4-6 prophage; S-methylmethionine:homocysteine methyltransferase                                 | -0.84 |
| b0262 | afuC | Isolate 1 | non-essential | CP4-6 prophage; predicted ferric transporter subunit -!- ATP-binding component of ABC superfamily | 0.15  |
| b0262 | afuC | Isolate 2 | non-essential | CP4-6 prophage; predicted ferric transporter subunit -!- ATP-binding component of ABC superfamily | 0.16  |
| b0263 | afuB | Isolate 1 | non-essential | CP4-6 prophage; predicted ferric transporter subunit -!- membrane component of ABC superfamily    | 1.51  |
| b0263 | afuB | Isolate 2 | non-essential | CP4-6 prophage; predicted ferric transporter subunit -!- membrane component of ABC superfamily    | 0.65  |
| b0266 | yagB | Isolate 1 | non-essential | CP4-6 prophage; conserved protein                                                                 | -1.49 |
| b0266 | yagB | Isolate 2 | non-essential | CP4-6 prophage; conserved protein                                                                 | 0.03  |
| b0267 | yagA | Isolate 1 | non-essential | CP4-6 prophage; predicted DNA-binding transcriptional regulator                                   | -0.48 |
| b0267 | yagA | Isolate 2 | non-essential | CP4-6 prophage; predicted DNA-binding transcriptional regulator                                   | 0.89  |
| b0268 | yagE | Isolate 1 | non-essential | CP4-6 prophage; predicted lyase/synthase                                                          | -1.78 |
| b0268 | yagE | Isolate 2 | non-essential | CP4-6 prophage; predicted lyase/synthase                                                          | -0.48 |
| b0269 | yagF | Isolate 1 | non-essential | CP4-6 prophage; predicted dehydratase                                                             | 0.61  |
| b0269 | yagF | Isolate 2 | non-essential | CP4-6 prophage; predicted dehydratase                                                             | 0.38  |
| b0271 | yagH | Isolate 1 | non-essential | CP4-6 prophage; predicted xylosidase/arabinosidase                                                | -0.67 |
| b0271 | yagH | Isolate 2 | non-essential | CP4-6 prophage; predicted xylosidase/arabinosidase                                                | -1.10 |

|       |      |           |               |                                                                 |       |
|-------|------|-----------|---------------|-----------------------------------------------------------------|-------|
| b0272 | yagI | Isolate 1 | non-essential | CP4-6 prophage; predicted DNA-binding transcriptional regulator | -1.70 |
| b0272 | yagI | Isolate 2 | non-essential | CP4-6 prophage; predicted DNA-binding transcriptional regulator | -0.20 |
| b0273 | argF | Isolate 1 | non-essential | CP4-6 prophage; ornithine carbamoyltransferase 2, chain F       | 0.16  |
| b0273 | argF | Isolate 2 | non-essential | CP4-6 prophage; ornithine carbamoyltransferase 2, chain F       | -0.41 |
| b0276 | yagJ | Isolate 1 | non-essential | CP4-6 prophage; predicted protein                               | -0.09 |
| b0276 | yagJ | Isolate 2 | non-essential | CP4-6 prophage; predicted protein                               | -0.19 |
| b0277 | yagK | Isolate 1 | non-essential | CP4-6 prophage; conserved protein                               | -1.35 |
| b0277 | yagK | Isolate 2 | non-essential | CP4-6 prophage; conserved protein                               | -0.22 |
| b0278 | yagL | Isolate 1 | non-essential | CP4-6 prophage; DNA-binding protein                             | 0.49  |
| b0278 | yagL | Isolate 2 | non-essential | CP4-6 prophage; DNA-binding protein                             | -0.04 |
| b0279 | yagM | Isolate 1 | non-essential | CP4-6 prophage; predicted protein                               | 0.29  |
| b0279 | yagM | Isolate 2 | non-essential | CP4-6 prophage; predicted protein                               | 0.69  |
| b0280 | yagN | Isolate 1 | non-essential | CP4-6 prophage; predicted protein                               | 0.18  |
| b0280 | yagN | Isolate 2 | non-essential | CP4-6 prophage; predicted protein                               | -0.48 |
| b0281 | intF | Isolate 1 | non-essential | CP4-6 prophage; predicted phage integrase                       | -0.02 |
| b0281 | intF | Isolate 2 | non-essential | CP4-6 prophage; predicted phage integrase                       | 0.78  |
| b0282 | yagP | Isolate 1 | non-essential | predicted transcriptional regulator                             | 2.06  |
| b0282 | yagP | Isolate 2 | non-essential | predicted transcriptional regulator                             | -0.86 |
| b0283 | yagQ | Isolate 1 | non-essential | conserved protein                                               | 0.72  |
| b0283 | yagQ | Isolate 2 | non-essential | conserved protein                                               | -0.17 |
| b0284 | yagR | Isolate 1 | non-essential | predicted oxidoreductase with molybdenum-binding domain         | 0.70  |
| b0284 | yagR | Isolate 2 | non-essential | predicted oxidoreductase with molybdenum-binding domain         | 0.89  |
| b0285 | yagS | Isolate 1 | non-essential | predicted oxidoreductase with FAD-binding domain                | 0.47  |
| b0285 | yagS | Isolate 2 | non-essential | predicted oxidoreductase with FAD-binding domain                | 0.34  |
| b0286 | yagT | Isolate 1 | non-essential | predicted xanthine dehydrogenase, 2Fe-2S subunit                | -0.16 |
| b0286 | yagT | Isolate 2 | non-essential | predicted xanthine dehydrogenase, 2Fe-2S subunit                | 2.57  |
| b0287 | yagU | Isolate 1 | non-essential | conserved inner membrane protein                                | -0.55 |
| b0287 | yagU | Isolate 2 | non-essential | conserved inner membrane protein                                | 0.63  |
| b0288 | ykgJ | Isolate 1 | non-essential | predicted ferredoxin                                            | -0.42 |
| b0288 | ykgJ | Isolate 2 | non-essential | predicted ferredoxin                                            | -0.46 |
| b0289 | yagV | Isolate 1 | non-essential | conserved protein                                               | 1.50  |
| b0289 | yagV | Isolate 2 | non-essential | conserved protein                                               | 1.76  |
| b0290 | yagW | Isolate 1 | non-essential | predicted receptor                                              | 1.00  |
| b0290 | yagW | Isolate 2 | non-essential | predicted receptor                                              | -0.96 |
| b0291 | yagX | Isolate 1 | non-essential | predicted aromatic compound dioxygenase                         | -1.15 |
| b0291 | yagX | Isolate 2 | non-essential | predicted aromatic compound dioxygenase                         | -0.01 |
| b0292 | yagY | Isolate 1 | non-essential | predicted protein                                               | 0.96  |
| b0292 | yagY | Isolate 2 | non-essential | predicted protein                                               | -0.41 |
| b0293 | yagZ | Isolate 1 | non-essential | conserved protein                                               | -1.76 |
| b0293 | yagZ | Isolate 2 | non-essential | conserved protein                                               | 1.15  |
| b0294 | ykgK | Isolate 1 | non-essential | predicted regulator                                             | -0.85 |
| b0294 | ykgK | Isolate 2 | non-essential | predicted regulator                                             | 0.09  |
| b0295 | ykgL | Isolate 1 | non-essential | predicted protein                                               | -0.30 |

|       |      |           |               |                                                                                             |       |
|-------|------|-----------|---------------|---------------------------------------------------------------------------------------------|-------|
| b0295 | ykgL | Isolate 2 | non-essential | predicted protein                                                                           | 0.27  |
| b0297 | eaeH | Isolate 1 | non-essential | attaching and effacing protein, pathogenesis factor                                         | -2.48 |
| b0297 | eaeH | Isolate 2 | non-essential | attaching and effacing protein, pathogenesis factor                                         | 0.64  |
| b0300 | ykgA | Isolate 1 | non-essential | predicted DNA-binding transcriptional regulator                                             | 0.33  |
| b0300 | ykgA | Isolate 2 | non-essential | predicted DNA-binding transcriptional regulator                                             | 0.14  |
| b0301 | ykgB | Isolate 1 | non-essential | conserved inner membrane protein                                                            | -1.07 |
| b0301 | ykgB | Isolate 2 | non-essential | conserved inner membrane protein                                                            | -0.98 |
| b0303 | ykgI | Isolate 1 | non-essential | predicted protein                                                                           | -0.37 |
| b0303 | ykgI | Isolate 2 | non-essential | predicted protein                                                                           | 0.75  |
| b0304 | ykgC | Isolate 1 | non-essential | predicted oxidoreductase with FAD/NAD(P)-binding domain and dimerization domain             | 3.00  |
| b0304 | ykgC | Isolate 2 | non-essential | predicted oxidoreductase with FAD/NAD(P)-binding domain and dimerization domain             | 1.53  |
| b0305 | ykgD | Isolate 1 | non-essential | predicted DNA-binding transcriptional regulator                                             | 1.17  |
| b0305 | ykgD | Isolate 2 | non-essential | predicted DNA-binding transcriptional regulator                                             | 0.45  |
| b0306 | ykgE | Isolate 1 | non-essential | predicted oxidoreductase                                                                    | -0.19 |
| b0306 | ykgE | Isolate 2 | non-essential | predicted oxidoreductase                                                                    | 0.03  |
| b0307 | ykgF | Isolate 1 | non-essential | predicted amino acid dehydrogenase with NAD(P)-binding domain and ferridoxin-like domain    | -0.58 |
| b0307 | ykgF | Isolate 2 | non-essential | predicted amino acid dehydrogenase with NAD(P)-binding domain and ferridoxin-like domain    | -0.93 |
| b0308 | ykgG | Isolate 1 | non-essential | predicted transporter                                                                       | 0.06  |
| b0308 | ykgG | Isolate 2 | non-essential | predicted transporter                                                                       | -0.19 |
| b0310 | ykgH | Isolate 1 | non-essential | predicted inner membrane protein                                                            | 0.34  |
| b0310 | ykgH | Isolate 2 | non-essential | predicted inner membrane protein                                                            | 1.32  |
| b0311 | betA | Isolate 1 | non-essential | choline dehydrogenase, a flavoprotein                                                       | -0.49 |
| b0311 | betA | Isolate 2 | non-essential | choline dehydrogenase, a flavoprotein                                                       | 1.16  |
| b0312 | betB | Isolate 1 | non-essential | betaine aldehyde dehydrogenase, NAD-dependent                                               | 0.81  |
| b0312 | betB | Isolate 2 | non-essential | betaine aldehyde dehydrogenase, NAD-dependent                                               | -1.98 |
| b0313 | betI | Isolate 1 | non-essential | DNA-binding transcriptional repressor                                                       | 1.33  |
| b0313 | betI | Isolate 2 | non-essential | DNA-binding transcriptional repressor                                                       | -0.09 |
| b0314 | betT | Isolate 1 | non-essential | choline transporter of high affinity                                                        | 0.49  |
| b0314 | betT | Isolate 2 | non-essential | choline transporter of high affinity                                                        | -1.13 |
| b0315 | yahA | Isolate 1 | non-essential | predicted DNA-binding transcriptional regulator                                             | -0.52 |
| b0315 | yahA | Isolate 2 | non-essential | predicted DNA-binding transcriptional regulator                                             | 0.98  |
| b0316 | yahB | Isolate 1 | non-essential | predicted DNA-binding transcriptional regulator                                             | 0.52  |
| b0316 | yahB | Isolate 2 | non-essential | predicted DNA-binding transcriptional regulator                                             | 1.07  |
| b0317 | yahC | Isolate 1 | non-essential | predicted inner membrane protein                                                            | -0.01 |
| b0317 | yahC | Isolate 2 | non-essential | predicted inner membrane protein                                                            | -0.56 |
| b0318 | yahD | Isolate 1 | non-essential | predicted transcriptional regulator with ankyrin domain                                     | 0.90  |
| b0318 | yahD | Isolate 2 | non-essential | predicted transcriptional regulator with ankyrin domain                                     | 0.39  |
| b0319 | yahE | Isolate 1 | non-essential | predicted protein                                                                           | 2.01  |
| b0319 | yahE | Isolate 2 | non-essential | predicted protein                                                                           | 0.07  |
| b0320 | yahF | Isolate 1 | non-essential | predicted acyl-CoA synthetase with NAD(P)-binding domain and succinyl-CoA synthetase domain | -0.08 |
| b0320 | yahF | Isolate 2 | non-essential | predicted acyl-CoA synthetase with NAD(P)-binding domain and succinyl-CoA synthetase domain | -0.36 |
| b0321 | yahG | Isolate 1 | non-essential | conserved protein                                                                           | 1.02  |
| b0321 | yahG | Isolate 2 | non-essential | conserved protein                                                                           | -1.61 |

|       |      |           |               |                                                             |        |
|-------|------|-----------|---------------|-------------------------------------------------------------|--------|
| b0322 | yahH | Isolate 1 | non-essential | predicted protein                                           | -0.27  |
| b0322 | yahH | Isolate 2 | non-essential | predicted protein                                           | -0.47  |
| b0323 | yahI | Isolate 1 | non-essential | predicted carbamate kinase-like protein                     | 0.39   |
| b0323 | yahI | Isolate 2 | non-essential | predicted carbamate kinase-like protein                     | 0.54   |
| b0324 | yahJ | Isolate 1 | non-essential | predicted deaminase with metallo-dependent hydrolase domain | 0.37   |
| b0324 | yahJ | Isolate 2 | non-essential | predicted deaminase with metallo-dependent hydrolase domain | 0.89   |
| b0325 | yahK | Isolate 1 | non-essential | predicted oxidoreductase, Zn-dependent and NAD(P)-binding   | 1.89   |
| b0325 | yahK | Isolate 2 | non-essential | predicted oxidoreductase, Zn-dependent and NAD(P)-binding   | -0.58  |
| b0326 | yahL | Isolate 1 | non-essential | predicted protein                                           | -1.18  |
| b0326 | yahL | Isolate 2 | non-essential | predicted protein                                           | -12.64 |
| b0327 | yahM | Isolate 1 | non-essential | predicted protein                                           | 0.89   |
| b0327 | yahM | Isolate 2 | non-essential | predicted protein                                           | 1.91   |
| b0328 | yahN | Isolate 1 | non-essential | neutral amino-acid efflux system                            | 0.62   |
| b0328 | yahN | Isolate 2 | non-essential | neutral amino-acid efflux system                            | 0.36   |
| b0329 | yahO | Isolate 1 | non-essential | predicted protein                                           | -1.41  |
| b0329 | yahO | Isolate 2 | non-essential | predicted protein                                           | -1.33  |
| b0330 | prpR | Isolate 1 | non-essential | DNA-binding transcriptional regulator                       | 1.36   |
| b0330 | prpR | Isolate 2 | non-essential | DNA-binding transcriptional regulator                       | -1.36  |
| b0331 | prpB | Isolate 1 | non-essential | 2-methylisocitrate lyase                                    | -1.40  |
| b0331 | prpB | Isolate 2 | non-essential | 2-methylisocitrate lyase                                    | -1.56  |
| b0333 | prpC | Isolate 1 | non-essential | 2-methylcitrate synthase                                    | -2.08  |
| b0333 | prpC | Isolate 2 | non-essential | 2-methylcitrate synthase                                    | -2.28  |
| b0334 | prpD | Isolate 1 | non-essential | 2-methylcitrate dehydratase                                 | -0.49  |
| b0334 | prpD | Isolate 2 | non-essential | 2-methylcitrate dehydratase                                 | -3.65  |
| b0335 | prpE | Isolate 1 | non-essential | predicted propionyl-CoA synthetase with ATPase domain       | -0.10  |
| b0335 | prpE | Isolate 2 | non-essential | predicted propionyl-CoA synthetase with ATPase domain       | -0.49  |
| b0336 | codB | Isolate 1 | non-essential | cytosine transporter                                        | -0.76  |
| b0336 | codB | Isolate 2 | non-essential | cytosine transporter                                        | -0.35  |
| b0337 | codA | Isolate 1 | non-essential | cytosine deaminase                                          | 0.60   |
| b0337 | codA | Isolate 2 | non-essential | cytosine deaminase                                          | 1.19   |
| b0338 | cynR | Isolate 1 | non-essential | DNA-binding transcriptional dual regulator                  | 0.46   |
| b0338 | cynR | Isolate 2 | non-essential | DNA-binding transcriptional dual regulator                  | -0.84  |
| b0339 | cynT | Isolate 1 | non-essential | carbonic anhydrase                                          | 0.14   |
| b0339 | cynT | Isolate 2 | non-essential | carbonic anhydrase                                          | 0.71   |
| b0340 | cynS | Isolate 1 | non-essential | cyanate aminohydrolase                                      | -0.22  |
| b0340 | cynS | Isolate 2 | non-essential | cyanate aminohydrolase                                      | 0.46   |
| b0341 | cynX | Isolate 1 | non-essential | predicted cyanate transporter                               | -0.15  |
| b0341 | cynX | Isolate 2 | non-essential | predicted cyanate transporter                               | -1.12  |
| b0342 | lacA | Isolate 1 | non-essential | thiogalactoside acetyltransferase                           | -0.36  |
| b0342 | lacA | Isolate 2 | non-essential | thiogalactoside acetyltransferase                           | 0.20   |
| b0343 | lacY | Isolate 1 | non-essential | lactose/galactose transporter                               | 0.86   |
| b0343 | lacY | Isolate 2 | non-essential | lactose/galactose transporter                               | -1.11  |
| b0345 | lacI | Isolate 1 | non-essential | DNA-binding transcriptional repressor                       | -1.28  |

|       |      |           |               |                                                                                  |        |
|-------|------|-----------|---------------|----------------------------------------------------------------------------------|--------|
| b0345 | lacI | Isolate 2 | non-essential | DNA-binding transcriptional repressor                                            | -1.27  |
| b0346 | mhpR | Isolate 1 | non-essential | DNA-binding transcriptional activator, 3HPP-binding                              | -13.93 |
| b0346 | mhpR | Isolate 2 | non-essential | DNA-binding transcriptional activator, 3HPP-binding                              | 1.62   |
| b0347 | mhpA | Isolate 1 | non-essential | 3-(3-hydroxyphenyl)propionate hydroxylase                                        | -0.16  |
| b0347 | mhpA | Isolate 2 | non-essential | 3-(3-hydroxyphenyl)propionate hydroxylase                                        | 0.58   |
| b0348 | mhpB | Isolate 1 | non-essential | 2,3-dihydroxyphenylpropionate 1,2-dioxygenase                                    | -0.56  |
| b0348 | mhpB | Isolate 2 | non-essential | 2,3-dihydroxyphenylpropionate 1,2-dioxygenase                                    | -0.34  |
| b0349 | mhpC | Isolate 1 | non-essential | 2-hydroxy-6-ketono-2,4-dienedioic acid hydrolase                                 | -1.18  |
| b0349 | mhpC | Isolate 2 | non-essential | 2-hydroxy-6-ketono-2,4-dienedioic acid hydrolase                                 | 3.25   |
| b0350 | mhpD | Isolate 1 | non-essential | 2-keto-4-pentenoate hydratase                                                    | 0.00   |
| b0350 | mhpD | Isolate 2 | non-essential | 2-keto-4-pentenoate hydratase                                                    | -0.90  |
| b0351 | mhpF | Isolate 1 | non-essential | acetaldehyde-CoA dehydrogenase II, NAD-binding                                   | 1.89   |
| b0351 | mhpF | Isolate 2 | non-essential | acetaldehyde-CoA dehydrogenase II, NAD-binding                                   | -0.50  |
| b0352 | mhpE | Isolate 1 | non-essential | 4-hydroxy-2-oxovalerate/4-hydroxy-2-oxopentanoic acid aldolase, class I          | 0.29   |
| b0352 | mhpE | Isolate 2 | non-essential | 4-hydroxy-2-oxovalerate/4-hydroxy-2-oxopentanoic acid aldolase, class I          | -1.53  |
| b0353 | mhpT | Isolate 1 | non-essential | predicted 3-hydroxyphenylpropionic transporter                                   | 2.30   |
| b0353 | mhpT | Isolate 2 | non-essential | predicted 3-hydroxyphenylpropionic transporter                                   | -0.57  |
| b0354 | yaiL | Isolate 1 | non-essential | nucleoprotein/polynucleotide-associated enzyme                                   | 0.84   |
| b0354 | yaiL | Isolate 2 | non-essential | nucleoprotein/polynucleotide-associated enzyme                                   | -0.02  |
| b0355 | frmB | Isolate 1 | non-essential | predicted esterase                                                               | 2.06   |
| b0355 | frmB | Isolate 2 | non-essential | predicted esterase                                                               | 0.88   |
| b0356 | frmA | Isolate 1 | non-essential | alcohol dehydrogenase class III/glutathione-dependent formaldehyde dehydrogenase | -1.07  |
| b0356 | frmA | Isolate 2 | non-essential | alcohol dehydrogenase class III/glutathione-dependent formaldehyde dehydrogenase | 0.81   |
| b0357 | frmR | Isolate 1 | non-essential | regulator protein that represses frmRAB operon                                   | 1.53   |
| b0357 | frmR | Isolate 2 | non-essential | regulator protein that represses frmRAB operon                                   | -0.54  |
| b0358 | yaiO | Isolate 1 | non-essential | predicted protein                                                                | 1.85   |
| b0358 | yaiO | Isolate 2 | non-essential | predicted protein                                                                | 1.97   |
| b0359 | yaiX | Isolate 1 | *             | predicted acyl transferase (pseudogene)                                          | 0.45   |
| b0359 | yaiX | Isolate 2 | *             | predicted acyl transferase (pseudogene)                                          | 1.70   |
| b0362 | yaiF | Isolate 1 | non-essential | predicted protein                                                                | 0.00   |
| b0362 | yaiF | Isolate 2 | non-essential | predicted protein                                                                | -1.90  |
| b0363 | yaiP | Isolate 1 | non-essential | predicted glucosyltransferase                                                    | 1.25   |
| b0363 | yaiP | Isolate 2 | non-essential | predicted glucosyltransferase                                                    | 0.19   |
| b0364 | yaiS | Isolate 1 | non-essential | conserved protein                                                                | 0.59   |
| b0364 | yaiS | Isolate 2 | non-essential | conserved protein                                                                | 2.46   |
| b0365 | tauA | Isolate 1 | non-essential | taurine transporter subunit -!- periplasmic-binding component of ABC superfamily | 0.01   |
| b0365 | tauA | Isolate 2 | non-essential | taurine transporter subunit -!- periplasmic-binding component of ABC superfamily | -1.44  |
| b0366 | tauB | Isolate 1 | non-essential | taurine transporter subunit -!- ATP-binding component of ABC superfamily         | -0.04  |
| b0366 | tauB | Isolate 2 | non-essential | taurine transporter subunit -!- ATP-binding component of ABC superfamily         | -0.58  |
| b0367 | tauC | Isolate 1 | non-essential | taurine transporter subunit -!- membrane component of ABC superfamily            | 0.30   |
| b0367 | tauC | Isolate 2 | non-essential | taurine transporter subunit -!- membrane component of ABC superfamily            | -0.58  |
| b0368 | tauD | Isolate 1 | non-essential | taurine dioxygenase, 2-oxoglutarate-dependent                                    | -1.21  |
| b0368 | tauD | Isolate 2 | non-essential | taurine dioxygenase, 2-oxoglutarate-dependent                                    | -0.42  |

|       |      |           |               |                                                   |       |
|-------|------|-----------|---------------|---------------------------------------------------|-------|
| b0370 | ykiB | Isolate 1 | non-essential | predicted protein                                 | 0.30  |
| b0370 | ykiB | Isolate 2 | non-essential | predicted protein                                 | 2.35  |
| b0371 | yaiT | Isolate 1 | non-essential | predicted protein                                 | 0.91  |
| b0371 | yaiT | Isolate 2 | non-essential | predicted protein                                 | -0.67 |
| b0374 | yaiU | Isolate 1 | non-essential | predicted protein                                 | -0.45 |
| b0374 | yaiU | Isolate 2 | non-essential | predicted protein                                 | 0.76  |
| b0375 | yaiV | Isolate 1 | non-essential | predicted DNA-binding transcriptional regulator   | 0.93  |
| b0375 | yaiV | Isolate 2 | non-essential | predicted DNA-binding transcriptional regulator   | 0.79  |
| b0376 | ampH | Isolate 1 | non-essential | beta-lactamase/D-alanine carboxypeptidase         | 1.18  |
| b0376 | ampH | Isolate 2 | non-essential | beta-lactamase/D-alanine carboxypeptidase         | 0.05  |
| b0377 | sbmA | Isolate 1 | non-essential | predicted transporter                             | 1.70  |
| b0377 | sbmA | Isolate 2 | non-essential | predicted transporter                             | 2.55  |
| b0378 | yaiW | Isolate 1 | non-essential | predicted DNA-binding transcriptional regulator   | 0.34  |
| b0378 | yaiW | Isolate 2 | non-essential | predicted DNA-binding transcriptional regulator   | 0.83  |
| b0379 | yaiY | Isolate 1 | non-essential | predicted inner membrane protein                  | -0.97 |
| b0379 | yaiY | Isolate 2 | non-essential | predicted inner membrane protein                  | 1.43  |
| b0380 | yaiZ | Isolate 1 | non-essential | predicted inner membrane protein                  | 0.01  |
| b0380 | yaiZ | Isolate 2 | non-essential | predicted inner membrane protein                  | 0.59  |
| b0381 | ddlA | Isolate 1 | non-essential | D-alanine-D-alanine ligase A                      | 0.07  |
| b0381 | ddlA | Isolate 2 | non-essential | D-alanine-D-alanine ligase A                      | 0.38  |
| b0382 | yaiB | Isolate 1 | non-essential | predicted protein                                 | 1.36  |
| b0382 | yaiB | Isolate 2 | non-essential | predicted protein                                 | 1.70  |
| b0383 | phoA | Isolate 1 | non-essential | alkaline phosphatase                              | 1.01  |
| b0383 | phoA | Isolate 2 | non-essential | alkaline phosphatase                              | 0.90  |
| b0384 | psiF | Isolate 1 | non-essential | conserved protein                                 | 2.74  |
| b0384 | psiF | Isolate 2 | non-essential | conserved protein                                 | 0.72  |
| b0385 | yaiC | Isolate 1 | non-essential | predicted diguanylate cyclase                     | 1.71  |
| b0385 | yaiC | Isolate 2 | non-essential | predicted diguanylate cyclase                     | 0.13  |
| b0386 | proC | Isolate 1 | non-essential | pyrroline-5-carboxylate reductase, NAD(P)-binding | 1.07  |
| b0386 | proC | Isolate 2 | non-essential | pyrroline-5-carboxylate reductase, NAD(P)-binding | -0.50 |
| b0387 | yaiI | Isolate 1 | non-essential | conserved protein                                 | 1.27  |
| b0387 | yaiI | Isolate 2 | non-essential | conserved protein                                 | 0.33  |
| b0388 | aroL | Isolate 1 | non-essential | shikimate kinase II                               | 1.97  |
| b0388 | aroL | Isolate 2 | non-essential | shikimate kinase II                               | -0.02 |
| b0389 | yaiA | Isolate 1 | non-essential | predicted protein                                 | 1.82  |
| b0389 | yaiA | Isolate 2 | non-essential | predicted protein                                 | 0.76  |
| b0390 | aroM | Isolate 1 | non-essential | conserved protein                                 | 0.26  |
| b0390 | aroM | Isolate 2 | non-essential | conserved protein                                 | 0.92  |
| b0391 | yaiE | Isolate 1 | non-essential | conserved protein                                 | -0.57 |
| b0391 | yaiE | Isolate 2 | non-essential | conserved protein                                 | -1.13 |
| b0392 | ykiA | Isolate 1 | non-essential | predicted protein                                 | -0.90 |
| b0392 | ykiA | Isolate 2 | non-essential | predicted protein                                 | 0.26  |
| b0393 | rdgC | Isolate 1 | non-essential | DNA-binding protein, non-specific                 | 1.02  |



|       |      |           |               |                                                                                                               |       |
|-------|------|-----------|---------------|---------------------------------------------------------------------------------------------------------------|-------|
| b0393 | rdgC | Isolate 2 | non-essential | DNA-binding protein, non-specific                                                                             | -1.92 |
| b0394 | mak  | Isolate 1 | non-essential | manno(fructo)kinase                                                                                           | 0.53  |
| b0394 | mak  | Isolate 2 | non-essential | manno(fructo)kinase                                                                                           | 0.02  |
| b0396 | araJ | Isolate 1 | non-essential | predicted transporter                                                                                         | 0.60  |
| b0396 | araJ | Isolate 2 | non-essential | predicted transporter                                                                                         | 0.80  |
| b0397 | sbcC | Isolate 1 | non-essential | exonuclease, dsDNA, ATP-dependent                                                                             | 0.50  |
| b0397 | sbcC | Isolate 2 | non-essential | exonuclease, dsDNA, ATP-dependent                                                                             | 0.14  |
| b0398 | sbcD | Isolate 1 | non-essential | exonuclease, dsDNA, ATP-dependent                                                                             | -0.26 |
| b0398 | sbcD | Isolate 2 | non-essential | exonuclease, dsDNA, ATP-dependent                                                                             | 2.55  |
| b0399 | phoB | Isolate 1 | non-essential | DNA-binding response regulator in two-component regulatory system with PhoR (or CreC)                         | 0.11  |
| b0399 | phoB | Isolate 2 | non-essential | DNA-binding response regulator in two-component regulatory system with PhoR (or CreC)                         | 0.41  |
| b0400 | phoR | Isolate 1 | non-essential | sensory histidine kinase in two-component regulatory system with PhoB                                         | -1.68 |
| b0400 | phoR | Isolate 2 | non-essential | sensory histidine kinase in two-component regulatory system with PhoB                                         | 0.91  |
| b0401 | brnQ | Isolate 1 | non-essential | predicted branched chain amino acid transporter (LIV-II)                                                      | -1.48 |
| b0401 | brnQ | Isolate 2 | non-essential | predicted branched chain amino acid transporter (LIV-II)                                                      | 1.10  |
| b0402 | proY | Isolate 1 | non-essential | predicted cryptic proline transporter                                                                         | -0.02 |
| b0402 | proY | Isolate 2 | non-essential | predicted cryptic proline transporter                                                                         | 0.41  |
| b0403 | malZ | Isolate 1 | non-essential | maltodextrin glucosidase                                                                                      | -1.99 |
| b0403 | malZ | Isolate 2 | non-essential | maltodextrin glucosidase                                                                                      | -0.93 |
| b0404 | yajB | Isolate 1 | non-essential | conserved protein                                                                                             | 0.67  |
| b0404 | yajB | Isolate 2 | non-essential | conserved protein                                                                                             | -1.50 |
| b0405 | queA | Isolate 1 | non-essential | S-adenosylmethionine:tRNA ribosyltransferase-isomerase                                                        | 2.14  |
| b0405 | queA | Isolate 2 | non-essential | S-adenosylmethionine:tRNA ribosyltransferase-isomerase                                                        | -0.30 |
| b0406 | tgt  | Isolate 1 | non-essential | tRNA-guanine transglycosylase                                                                                 | 1.29  |
| b0406 | tgt  | Isolate 2 | non-essential | tRNA-guanine transglycosylase                                                                                 | 0.93  |
| b0407 | yajC | Isolate 1 | non-essential | SecYEG protein translocase auxillary subunit                                                                  | 0.17  |
| b0407 | yajC | Isolate 2 | non-essential | SecYEG protein translocase auxillary subunit                                                                  | -1.27 |
| b0410 | yajD | Isolate 1 | non-essential | conserved protein                                                                                             | 0.93  |
| b0410 | yajD | Isolate 2 | non-essential | conserved protein                                                                                             | 0.40  |
| b0411 | tsx  | Isolate 1 | non-essential | nucleoside channel, receptor of phage T6 and colicin K                                                        | -1.18 |
| b0411 | tsx  | Isolate 2 | non-essential | nucleoside channel, receptor of phage T6 and colicin K                                                        | 0.94  |
| b0412 | yajI | Isolate 1 | non-essential | predicted lipoprotein                                                                                         | 0.19  |
| b0412 | yajI | Isolate 2 | non-essential | predicted lipoprotein                                                                                         | -0.77 |
| b0413 | ybaD | Isolate 1 | non-essential | conserved protein                                                                                             | -0.48 |
| b0413 | ybaD | Isolate 2 | non-essential | conserved protein                                                                                             | 0.51  |
| b0414 | ribD | Isolate 1 | essential     | fused diaminoxyphosphoribosylaminopyrimidine deaminase -!- 5-amino-6-(5-phosphoribosylamino) uracil reductase | 2.41  |
| b0415 | ribE | Isolate 1 | essential     | riboflavin synthase beta chain                                                                                | 14.62 |
| b0416 | nusB | Isolate 1 | non-essential | transcription antitermination protein                                                                         | -2.28 |
| b0416 | nusB | Isolate 2 | non-essential | transcription antitermination protein                                                                         | -1.42 |
| b0418 | pgpA | Isolate 1 | non-essential | phosphatidylglycerophosphatase A                                                                              | -1.94 |
| b0418 | pgpA | Isolate 2 | non-essential | phosphatidylglycerophosphatase A                                                                              | -1.46 |
| b0419 | yajO | Isolate 1 | non-essential | predicted oxidoreductase, NAD(P)-binding                                                                      | -0.91 |
| b0419 | yajO | Isolate 2 | non-essential | predicted oxidoreductase, NAD(P)-binding                                                                      | 1.59  |

|       |      |           |               |                                                                                        |       |
|-------|------|-----------|---------------|----------------------------------------------------------------------------------------|-------|
| b0420 | dxs  | Isolate 1 | essential     | 1-deoxyxylulose-5-phosphate synthase, thiamine-requiring, FAD-requiring                | 1.59  |
| b0421 | ispA | Isolate 1 | essential     | geranyltranstransferase                                                                | 1.49  |
| b0422 | xseB | Isolate 1 | non-essential | exonuclease VII small subunit                                                          | 0.70  |
| b0422 | xseB | Isolate 2 | non-essential | exonuclease VII small subunit                                                          | -1.16 |
| b0423 | thiI | Isolate 1 | non-essential | sulfurtransferase required for thiamine and 4-thiouridine biosynthesis                 | -0.83 |
| b0423 | thiI | Isolate 2 | non-essential | sulfurtransferase required for thiamine and 4-thiouridine biosynthesis                 | -0.01 |
| b0424 | yajL | Isolate 1 | non-essential | conserved protein                                                                      | -1.11 |
| b0424 | yajL | Isolate 2 | non-essential | conserved protein                                                                      | 0.28  |
| b0425 | panE | Isolate 1 | non-essential | 2-dehydropantoate reductase, NADPH-specific                                            | -0.34 |
| b0425 | panE | Isolate 2 | non-essential | 2-dehydropantoate reductase, NADPH-specific                                            | -0.11 |
| b0426 | yajQ | Isolate 1 | non-essential | predicted nucleotide binding protein                                                   | -0.89 |
| b0426 | yajQ | Isolate 2 | non-essential | predicted nucleotide binding protein                                                   | -1.13 |
| b0427 | yajR | Isolate 1 | non-essential | predicted transporter                                                                  | 0.54  |
| b0427 | yajR | Isolate 2 | non-essential | predicted transporter                                                                  | 0.09  |
| b0428 | cyoE | Isolate 1 | non-essential | protoheme IX farnesyltransferase                                                       | 1.05  |
| b0428 | cyoE | Isolate 2 | non-essential | protoheme IX farnesyltransferase                                                       | 2.73  |
| b0429 | cyoD | Isolate 1 | non-essential | cytochrome o ubiquinol oxidase subunit IV                                              | -0.25 |
| b0429 | cyoD | Isolate 2 | non-essential | cytochrome o ubiquinol oxidase subunit IV                                              | 0.07  |
| b0430 | cyoC | Isolate 1 | non-essential | cytochrome o ubiquinol oxidase subunit III                                             | 1.05  |
| b0430 | cyoC | Isolate 2 | non-essential | cytochrome o ubiquinol oxidase subunit III                                             | 0.18  |
| b0431 | cyoB | Isolate 1 | non-essential | cytochrome o ubiquinol oxidase subunit I                                               | 0.71  |
| b0431 | cyoB | Isolate 2 | non-essential | cytochrome o ubiquinol oxidase subunit I                                               | -0.21 |
| b0432 | cyoA | Isolate 1 | non-essential | cytochrome o ubiquinol oxidase subunit II                                              | 1.41  |
| b0432 | cyoA | Isolate 2 | non-essential | cytochrome o ubiquinol oxidase subunit II                                              | 1.20  |
| b0433 | ampG | Isolate 1 | non-essential | muropeptide transporter                                                                | 1.22  |
| b0433 | ampG | Isolate 2 | non-essential | muropeptide transporter                                                                | 0.86  |
| b0434 | yajG | Isolate 1 | non-essential | predicted lipoprotein                                                                  | 0.76  |
| b0434 | yajG | Isolate 2 | non-essential | predicted lipoprotein                                                                  | 0.62  |
| b0435 | bolA | Isolate 1 | non-essential | regulator of penicillin binding proteins and beta lactamase transcription (morphogene) | -0.30 |
| b0435 | bolA | Isolate 2 | non-essential | regulator of penicillin binding proteins and beta lactamase transcription (morphogene) | -0.17 |
| b0436 | tig  | Isolate 1 | non-essential | peptidyl-prolyl cis/trans isomerase (trigger factor)                                   | -0.44 |
| b0436 | tig  | Isolate 2 | non-essential | peptidyl-prolyl cis/trans isomerase (trigger factor)                                   | 0.28  |
| b0437 | clpP | Isolate 1 | non-essential | proteolytic subunit of ClpA-ClpP and ClpX-ClpP ATP-dependent serine proteases          | -0.32 |
| b0437 | clpP | Isolate 2 | non-essential | proteolytic subunit of ClpA-ClpP and ClpX-ClpP ATP-dependent serine proteases          | -0.04 |
| b0438 | clpX | Isolate 1 | non-essential | ATPase and specificity subunit of ClpX-ClpP ATP-dependent serine protease              | -0.53 |
| b0438 | clpX | Isolate 2 | non-essential | ATPase and specificity subunit of ClpX-ClpP ATP-dependent serine protease              | 0.02  |
| b0439 | lon  | Isolate 1 | non-essential | DNA-binding ATP-dependent protease La                                                  | -1.82 |
| b0439 | lon  | Isolate 2 | non-essential | DNA-binding ATP-dependent protease La                                                  | 1.21  |
| b0440 | hupB | Isolate 1 | non-essential | HU, DNA-binding transcriptional regulator, beta subunit                                | 0.74  |
| b0440 | hupB | Isolate 2 | non-essential | HU, DNA-binding transcriptional regulator, beta subunit                                | 2.20  |
| b0441 | ppiD | Isolate 1 | non-essential | peptidyl-prolyl cis-trans isomerase (rotamase D)                                       | 2.42  |
| b0441 | ppiD | Isolate 2 | non-essential | peptidyl-prolyl cis-trans isomerase (rotamase D)                                       | 3.12  |
| b0442 | ybaV | Isolate 1 | non-essential | conserved protein                                                                      | -0.09 |

|       |      |           |               |                                                                                              |       |
|-------|------|-----------|---------------|----------------------------------------------------------------------------------------------|-------|
| b0442 | ybaV | Isolate 2 | non-essential | conserved protein                                                                            | -1.89 |
| b0443 | ybaW | Isolate 1 | non-essential | conserved protein                                                                            | 0.96  |
| b0443 | ybaW | Isolate 2 | non-essential | conserved protein                                                                            | -0.53 |
| b0444 | ybaX | Isolate 1 | non-essential | predicted aluminum resistance protein                                                        | -0.64 |
| b0444 | ybaX | Isolate 2 | non-essential | predicted aluminum resistance protein                                                        | -0.29 |
| b0445 | ybaE | Isolate 1 | non-essential | predicted transporter subunit -!- periplasmic-binding component of ABC superfamily           | 0.99  |
| b0445 | ybaE | Isolate 2 | non-essential | predicted transporter subunit -!- periplasmic-binding component of ABC superfamily           | -0.06 |
| b0446 | cof  | Isolate 1 | non-essential | thiamin pyrimidine pyrophosphate hydrolase                                                   | 2.46  |
| b0446 | cof  | Isolate 2 | non-essential | thiamin pyrimidine pyrophosphate hydrolase                                                   | 1.08  |
| b0447 | ybaO | Isolate 1 | non-essential | predicted DNA-binding transcriptional regulator                                              | 0.26  |
| b0447 | ybaO | Isolate 2 | non-essential | predicted DNA-binding transcriptional regulator                                              | 3.10  |
| b0448 | mdlA | Isolate 1 | non-essential | fused predicted multidrug transporter subunits -!- ATP-binding components of ABC superfamily | 1.66  |
| b0448 | mdlA | Isolate 2 | non-essential | fused predicted multidrug transporter subunits -!- ATP-binding components of ABC superfamily | 0.55  |
| b0449 | mdlB | Isolate 1 | non-essential | fused predicted multidrug transporter subunits -!- ATP binding components of ABC superfamily | 2.51  |
| b0449 | mdlB | Isolate 2 | non-essential | fused predicted multidrug transporter subunits -!- ATP binding components of ABC superfamily | 1.11  |
| b0450 | glnK | Isolate 1 | non-essential | nitrogen assimilation regulatory protein for GlnL, GlnE, and AmtB                            | 1.31  |
| b0450 | glnK | Isolate 2 | non-essential | nitrogen assimilation regulatory protein for GlnL, GlnE, and AmtB                            | -0.72 |
| b0451 | amtB | Isolate 1 | non-essential | ammonium transporter                                                                         | 0.82  |
| b0451 | amtB | Isolate 2 | non-essential | ammonium transporter                                                                         | 0.85  |
| b0452 | tesB | Isolate 1 | non-essential | acyl-CoA thioesterase II                                                                     | 1.38  |
| b0452 | tesB | Isolate 2 | non-essential | acyl-CoA thioesterase II                                                                     | 1.52  |
| b0453 | ybaY | Isolate 1 | non-essential | predicted outer membrane lipoprotein                                                         | 1.41  |
| b0453 | ybaY | Isolate 2 | non-essential | predicted outer membrane lipoprotein                                                         | 2.59  |
| b0454 | ybaZ | Isolate 1 | non-essential | predicted methyltransferase                                                                  | 0.77  |
| b0454 | ybaZ | Isolate 2 | non-essential | predicted methyltransferase                                                                  | 0.44  |
| b0456 | ybaA | Isolate 1 | non-essential | conserved protein                                                                            | 2.10  |
| b0456 | ybaA | Isolate 2 | non-essential | conserved protein                                                                            | 1.97  |
| b0457 | ylaB | Isolate 1 | non-essential | conserved inner membrane protein                                                             | 0.37  |
| b0457 | ylaB | Isolate 2 | non-essential | conserved inner membrane protein                                                             | 0.50  |
| b0458 | ylaC | Isolate 1 | non-essential | predicted inner membrane protein                                                             | -0.33 |
| b0458 | ylaC | Isolate 2 | non-essential | predicted inner membrane protein                                                             | 0.83  |
| b0459 | maa  | Isolate 1 | non-essential | maltose O-acetyltransferase                                                                  | 0.99  |
| b0459 | maa  | Isolate 2 | non-essential | maltose O-acetyltransferase                                                                  | 0.70  |
| b0460 | hha  | Isolate 1 | non-essential | modulator of gene expression, with H-NS                                                      | 2.18  |
| b0460 | hha  | Isolate 2 | non-essential | modulator of gene expression, with H-NS                                                      | -1.04 |
| b0461 | ybaJ | Isolate 1 | non-essential | predicted protein                                                                            | 4.09  |
| b0461 | ybaJ | Isolate 2 | non-essential | predicted protein                                                                            | 0.11  |
| b0462 | acrB | Isolate 1 | non-essential | multidrug efflux system protein                                                              | 5.46  |
| b0462 | acrB | Isolate 2 | non-essential | multidrug efflux system protein                                                              | 3.54  |
| b0463 | acrA | Isolate 1 | non-essential | multidrug efflux system                                                                      | 3.75  |
| b0463 | acrA | Isolate 2 | non-essential | multidrug efflux system                                                                      | 4.29  |
| b0464 | acrR | Isolate 1 | non-essential | DNA-binding transcriptional regulator                                                        | -0.60 |
| b0464 | acrR | Isolate 2 | non-essential | DNA-binding transcriptional regulator                                                        | 2.34  |

|       |      |           |               |                                                                      |       |
|-------|------|-----------|---------------|----------------------------------------------------------------------|-------|
| b0465 | kefA | Isolate 1 | non-essential | fused mechanosensitive channel proteins                              | 2.62  |
| b0465 | kefA | Isolate 2 | non-essential | fused mechanosensitive channel proteins                              | 0.80  |
| b0466 | ybaM | Isolate 1 | non-essential | predicted protein                                                    | 0.68  |
| b0466 | ybaM | Isolate 2 | non-essential | predicted protein                                                    | 0.52  |
| b0467 | priC | Isolate 1 | non-essential | primosomal replication protein N"                                    | 0.26  |
| b0467 | priC | Isolate 2 | non-essential | primosomal replication protein N"                                    | 0.44  |
| b0468 | ybaN | Isolate 1 | non-essential | conserved inner membrane protein                                     | 1.03  |
| b0468 | ybaN | Isolate 2 | non-essential | conserved inner membrane protein                                     | 1.34  |
| b0469 | apt  | Isolate 1 | non-essential | adenine phosphoribosyltransferase                                    | 1.66  |
| b0469 | apt  | Isolate 2 | non-essential | adenine phosphoribosyltransferase                                    | -0.89 |
| b0470 | dnaX | Isolate 1 | essential     | DNA polymerase III/DNA elongation factor III, tau and gamma subunits | -1.37 |
| b0471 | ybaB | Isolate 1 | non-essential | conserved protein                                                    | 1.98  |
| b0471 | ybaB | Isolate 2 | non-essential | conserved protein                                                    | 0.35  |
| b0472 | recR | Isolate 1 | non-essential | gap repair protein                                                   | -0.06 |
| b0472 | recR | Isolate 2 | non-essential | gap repair protein                                                   | -0.78 |
| b0473 | htpG | Isolate 1 | non-essential | molecular chaperone HSP90 family                                     | 0.51  |
| b0473 | htpG | Isolate 2 | non-essential | molecular chaperone HSP90 family                                     | -0.37 |
| b0474 | adk  | Isolate 1 | essential     | adenylate kinase                                                     | 1.23  |
| b0476 | aes  | Isolate 1 | non-essential | acetyl esterase                                                      | 0.79  |
| b0476 | aes  | Isolate 2 | non-essential | acetyl esterase                                                      | -0.33 |
| b0477 | gsk  | Isolate 1 | non-essential | inosine/guanosine kinase                                             | -0.20 |
| b0477 | gsk  | Isolate 2 | non-essential | inosine/guanosine kinase                                             | -1.97 |
| b0478 | ybaL | Isolate 1 | non-essential | predicted transporter with NAD(P)-binding Rossmann-fold domain       | 1.54  |
| b0478 | ybaL | Isolate 2 | non-essential | predicted transporter with NAD(P)-binding Rossmann-fold domain       | 0.48  |
| b0479 | fsr  | Isolate 1 | non-essential | predicted fosmidomycin efflux system                                 | -0.32 |
| b0479 | fsr  | Isolate 2 | non-essential | predicted fosmidomycin efflux system                                 | -0.48 |
| b0480 | ushA | Isolate 1 | non-essential | bifunctional UDP-sugar hydrolase -!- 5'-nucleotidase                 | 1.81  |
| b0480 | ushA | Isolate 2 | non-essential | bifunctional UDP-sugar hydrolase -!- 5'-nucleotidase                 | 0.00  |
| b0481 | ybaK | Isolate 1 | non-essential | conserved protein                                                    | -0.53 |
| b0481 | ybaK | Isolate 2 | non-essential | conserved protein                                                    | 1.74  |
| b0482 | ybaP | Isolate 1 | non-essential | conserved protein                                                    | -1.42 |
| b0482 | ybaP | Isolate 2 | non-essential | conserved protein                                                    | -0.79 |
| b0483 | ybaQ | Isolate 1 | non-essential | predicted DNA-binding transcriptional regulator                      | -4.00 |
| b0483 | ybaQ | Isolate 2 | non-essential | predicted DNA-binding transcriptional regulator                      | -1.56 |
| b0484 | copA | Isolate 1 | non-essential | copper transporter                                                   | -0.46 |
| b0484 | copA | Isolate 2 | non-essential | copper transporter                                                   | -0.89 |
| b0485 | ybaS | Isolate 1 | non-essential | predicted glutaminase                                                | 1.82  |
| b0485 | ybaS | Isolate 2 | non-essential | predicted glutaminase                                                | -0.30 |
| b0486 | ybaT | Isolate 1 | non-essential | predicted transporter                                                | 0.90  |
| b0486 | ybaT | Isolate 2 | non-essential | predicted transporter                                                | -0.53 |
| b0487 | cueR | Isolate 1 | non-essential | DNA-binding transcriptional activator                                | -0.21 |
| b0487 | cueR | Isolate 2 | non-essential | DNA-binding transcriptional activator                                | -0.34 |
| b0488 | ybbJ | Isolate 1 | non-essential | conserved inner membrane protein                                     | -9.60 |

|       |      |           |               |                                                                                 |       |
|-------|------|-----------|---------------|---------------------------------------------------------------------------------|-------|
| b0488 | ybbJ | Isolate 2 | non-essential | conserved inner membrane protein                                                | -0.68 |
| b0489 | ybbK | Isolate 1 | non-essential | predicted protease, membrane anchored                                           | 1.96  |
| b0489 | ybbK | Isolate 2 | non-essential | predicted protease, membrane anchored                                           | 0.59  |
| b0490 | ybbL | Isolate 1 | non-essential | predicted transporter subunit -!- ATP-binding component of ABC superfamily      | -0.77 |
| b0490 | ybbL | Isolate 2 | non-essential | predicted transporter subunit -!- ATP-binding component of ABC superfamily      | -1.52 |
| b0491 | ybbM | Isolate 1 | non-essential | predicted inner membrane protein                                                | -0.31 |
| b0491 | ybbM | Isolate 2 | non-essential | predicted inner membrane protein                                                | -0.72 |
| b0492 | ybbN | Isolate 1 | non-essential | predicted thioredoxin domain-containing protein                                 | 0.17  |
| b0492 | ybbN | Isolate 2 | non-essential | predicted thioredoxin domain-containing protein                                 | -1.74 |
| b0493 | ybbO | Isolate 1 | non-essential | predicted oxidoreductase with NAD(P)-binding Rossmann-fold domain               | 0.60  |
| b0493 | ybbO | Isolate 2 | non-essential | predicted oxidoreductase with NAD(P)-binding Rossmann-fold domain               | 0.19  |
| b0494 | tesA | Isolate 1 | non-essential | multifunctional acyl-CoA thioesterase I -!- protease I -!- lysophospholipase L1 | 1.29  |
| b0494 | tesA | Isolate 2 | non-essential | multifunctional acyl-CoA thioesterase I -!- protease I -!- lysophospholipase L1 | -0.33 |
| b0495 | ybbA | Isolate 1 | non-essential | predicted transporter subunit -!- ATP-binding component of ABC superfamily      | 0.12  |
| b0495 | ybbA | Isolate 2 | non-essential | predicted transporter subunit -!- ATP-binding component of ABC superfamily      | -0.05 |
| b0496 | ybbP | Isolate 1 | non-essential | predicted inner membrane protein                                                | 0.81  |
| b0496 | ybbP | Isolate 2 | non-essential | predicted inner membrane protein                                                | 0.41  |
| b0497 | rhsD | Isolate 1 | non-essential | rhsD element protein                                                            | 0.79  |
| b0497 | rhsD | Isolate 2 | non-essential | rhsD element protein                                                            | -0.31 |
| b0498 | ybbC | Isolate 1 | non-essential | predicted protein                                                               | -1.55 |
| b0498 | ybbC | Isolate 2 | non-essential | predicted protein                                                               | -1.66 |
| b0499 | ylbH | Isolate 1 | non-essential | conserved protein, rhs-like                                                     | -0.94 |
| b0499 | ylbH | Isolate 2 | non-essential | conserved protein, rhs-like                                                     | -0.72 |
| b0500 | ybbD | Isolate 1 | non-essential | predicted protein                                                               | -0.83 |
| b0500 | ybbD | Isolate 2 | non-essential | predicted protein                                                               | 0.14  |
| b0503 | ybbB | Isolate 1 | non-essential | tRNA 2-selenouridine synthase, selenophosphate-dependent                        | 0.29  |
| b0503 | ybbB | Isolate 2 | non-essential | tRNA 2-selenouridine synthase, selenophosphate-dependent                        | -1.49 |
| b0504 | ybbS | Isolate 1 | non-essential | transcriptional activator of the allD operon                                    | -0.16 |
| b0504 | ybbS | Isolate 2 | non-essential | transcriptional activator of the allD operon                                    | 1.47  |
| b0505 | allA | Isolate 1 | non-essential | ureidoglycolate hydrolase                                                       | 1.14  |
| b0505 | allA | Isolate 2 | non-essential | ureidoglycolate hydrolase                                                       | -2.21 |
| b0506 | allR | Isolate 1 | non-essential | DNA-binding transcriptional regulator                                           | 0.73  |
| b0506 | allR | Isolate 2 | non-essential | DNA-binding transcriptional regulator                                           | -0.58 |
| b0507 | gcl  | Isolate 1 | non-essential | glyoxylate carbonylase                                                          | 1.54  |
| b0507 | gcl  | Isolate 2 | non-essential | glyoxylate carbonylase                                                          | 0.34  |
| b0508 | hyi  | Isolate 1 | non-essential | hydroxypyruvate isomerase                                                       | -1.24 |
| b0508 | hyi  | Isolate 2 | non-essential | hydroxypyruvate isomerase                                                       | -0.37 |
| b0509 | glxR | Isolate 1 | non-essential | tartronate semialdehyde reductase, NADH-dependent                               | -3.37 |
| b0509 | glxR | Isolate 2 | non-essential | tartronate semialdehyde reductase, NADH-dependent                               | 1.12  |
| b0510 | ybbV | Isolate 1 | non-essential | predicted protein                                                               | 0.34  |
| b0510 | ybbV | Isolate 2 | non-essential | predicted protein                                                               | 0.23  |
| b0511 | ybbW | Isolate 1 | non-essential | predicted allantoin transporter                                                 | 0.79  |
| b0511 | ybbW | Isolate 2 | non-essential | predicted allantoin transporter                                                 | 0.93  |

|       |      |           |               |                                                                        |        |
|-------|------|-----------|---------------|------------------------------------------------------------------------|--------|
| b0512 | allB | Isolate 1 | non-essential | allantoinase                                                           | -0.06  |
| b0512 | allB | Isolate 2 | non-essential | allantoinase                                                           | -1.39  |
| b0513 | ybbY | Isolate 1 | non-essential | predicted uracil/xanthine transporter                                  | 3.30   |
| b0513 | ybbY | Isolate 2 | non-essential | predicted uracil/xanthine transporter                                  | 0.72   |
| b0514 | glxK | Isolate 1 | non-essential | glycerate kinase II                                                    | 0.88   |
| b0514 | glxK | Isolate 2 | non-essential | glycerate kinase II                                                    | 1.08   |
| b0515 | ylbA | Isolate 1 | non-essential | conserved protein                                                      | -0.26  |
| b0515 | ylbA | Isolate 2 | non-essential | conserved protein                                                      | -1.73  |
| b0516 | allC | Isolate 1 | non-essential | allantoate amidohydrolase                                              | 1.58   |
| b0516 | allC | Isolate 2 | non-essential | allantoate amidohydrolase                                              | -1.34  |
| b0517 | allD | Isolate 1 | non-essential | ureidoglycolate dehydrogenase                                          | 0.70   |
| b0517 | allD | Isolate 2 | non-essential | ureidoglycolate dehydrogenase                                          | 1.57   |
| b0518 | fdrA | Isolate 1 | non-essential | predicted acyl-CoA synthetase with NAD(P)-binding Rossmann-fold domain | 0.66   |
| b0518 | fdrA | Isolate 2 | non-essential | predicted acyl-CoA synthetase with NAD(P)-binding Rossmann-fold domain | -10.16 |
| b0519 | ylbE | Isolate 1 | *             | predicted protein, C-ter fragment (pseudogene)                         | 0.19   |
| b0519 | ylbE | Isolate 2 | *             | predicted protein, C-ter fragment (pseudogene)                         | 1.49   |
| b0520 | ylbF | Isolate 1 | non-essential | conserved protein                                                      | 0.97   |
| b0520 | ylbF | Isolate 2 | non-essential | conserved protein                                                      | 1.04   |
| b0521 | ybcF | Isolate 1 | non-essential | predicted carbamate kinase                                             | -0.96  |
| b0521 | ybcF | Isolate 2 | non-essential | predicted carbamate kinase                                             | -0.51  |
| b0522 | purK | Isolate 1 | non-essential | N5-carboxyaminoimidazole ribonucleotide synthase                       | 0.81   |
| b0522 | purK | Isolate 2 | non-essential | N5-carboxyaminoimidazole ribonucleotide synthase                       | 0.27   |
| b0523 | purE | Isolate 1 | non-essential | N5-carboxyaminoimidazole ribonucleotide mutase                         | 0.00   |
| b0523 | purE | Isolate 2 | non-essential | N5-carboxyaminoimidazole ribonucleotide mutase                         | -1.31  |
| b0524 | lpxH | Isolate 1 | essential     | UDP-2,3-diacylglucosamine pyrophosphatase                              | -2.11  |
| b0525 | ppiB | Isolate 1 | non-essential | peptidyl-prolyl cis-trans isomerase B (rotamase B)                     | -0.02  |
| b0525 | ppiB | Isolate 2 | non-essential | peptidyl-prolyl cis-trans isomerase B (rotamase B)                     | -1.94  |
| b0526 | cysS | Isolate 1 | essential     | cysteinyl-tRNA synthetase                                              | -0.43  |
| b0527 | ybcI | Isolate 1 | non-essential | conserved inner membrane protein                                       | 1.99   |
| b0527 | ybcI | Isolate 2 | non-essential | conserved inner membrane protein                                       | -0.98  |
| b0528 | ybcJ | Isolate 1 | non-essential | predicted RNA-binding protein                                          | -0.90  |
| b0528 | ybcJ | Isolate 2 | non-essential | predicted RNA-binding protein                                          | 1.28   |
| b0530 | sfmA | Isolate 1 | non-essential | predicted fimbrial-like adhesin protein                                | 1.30   |
| b0530 | sfmA | Isolate 2 | non-essential | predicted fimbrial-like adhesin protein                                | 0.54   |
| b0531 | sfmC | Isolate 1 | non-essential | pilin chaperone, periplasmic                                           | 0.27   |
| b0531 | sfmC | Isolate 2 | non-essential | pilin chaperone, periplasmic                                           | 1.51   |
| b0532 | sfmD | Isolate 1 | non-essential | predicted outer membrane export usher protein                          | 0.21   |
| b0532 | sfmD | Isolate 2 | non-essential | predicted outer membrane export usher protein                          | 1.80   |
| b0533 | sfmH | Isolate 1 | non-essential | predicted fimbrial-like adhesin protein                                | 2.12   |
| b0533 | sfmH | Isolate 2 | non-essential | predicted fimbrial-like adhesin protein                                | 1.31   |
| b0534 | sfmF | Isolate 1 | non-essential | predicted fimbrial-like adhesin protein                                | 0.00   |
| b0534 | sfmF | Isolate 2 | non-essential | predicted fimbrial-like adhesin protein                                | -0.54  |
| b0535 | fimZ | Isolate 1 | non-essential | predicted DNA-binding transcriptional regulator                        | 0.56   |

|       |      |           |               |                                                                    |       |
|-------|------|-----------|---------------|--------------------------------------------------------------------|-------|
| b0535 | fimZ | Isolate 2 | non-essential | predicted DNA-binding transcriptional regulator                    | 0.82  |
| b0537 | intD | Isolate 1 | non-essential | DLP12 prophage; predicted integrase                                | -1.03 |
| b0537 | intD | Isolate 2 | non-essential | DLP12 prophage; predicted integrase                                | -1.51 |
| b0539 | ybcC | Isolate 1 | non-essential | DLP12 prophage; predicted exonuclease                              | 0.34  |
| b0539 | ybcC | Isolate 2 | non-essential | DLP12 prophage; predicted exonuclease                              | 1.16  |
| b0542 | renD | Isolate 1 | non-essential | DLP12 prophage; predicted protein                                  | 1.56  |
| b0542 | renD | Isolate 2 | non-essential | DLP12 prophage; predicted protein                                  | -0.03 |
| b0543 | emrE | Isolate 1 | non-essential | DLP12 prophage; multidrug resistance protein                       | 1.66  |
| b0543 | emrE | Isolate 2 | non-essential | DLP12 prophage; multidrug resistance protein                       | 0.80  |
| b0544 | ybcK | Isolate 1 | non-essential | DLP12 prophage; predicted recombinase                              | 0.84  |
| b0544 | ybcK | Isolate 2 | non-essential | DLP12 prophage; predicted recombinase                              | -1.65 |
| b0545 | ybcL | Isolate 1 | non-essential | DLP12 prophage; predicted kinase inhibitor                         | -1.36 |
| b0545 | ybcL | Isolate 2 | non-essential | DLP12 prophage; predicted kinase inhibitor                         | 0.12  |
| b0546 | ybcM | Isolate 1 | non-essential | DLP12 prophage; predicted DNA-binding transcriptional regulator    | -0.16 |
| b0546 | ybcM | Isolate 2 | non-essential | DLP12 prophage; predicted DNA-binding transcriptional regulator    | -1.45 |
| b0547 | ybcN | Isolate 1 | non-essential | DLP12 prophage; predicted protein                                  | 0.49  |
| b0547 | ybcN | Isolate 2 | non-essential | DLP12 prophage; predicted protein                                  | 0.55  |
| b0548 | ninE | Isolate 1 | non-essential | DLP12 prophage; conserved protein                                  | 1.23  |
| b0548 | ninE | Isolate 2 | non-essential | DLP12 prophage; conserved protein                                  | 0.91  |
| b0549 | ybcO | Isolate 1 | non-essential | DLP12 prophage; predicted protein                                  | -0.83 |
| b0549 | ybcO | Isolate 2 | non-essential | DLP12 prophage; predicted protein                                  | 1.73  |
| b0550 | rusA | Isolate 1 | non-essential | DLP12 prophage; endonuclease RUS                                   | 0.61  |
| b0550 | rusA | Isolate 2 | non-essential | DLP12 prophage; endonuclease RUS                                   | 0.66  |
| b0551 | ybcQ | Isolate 1 | non-essential | DLP12 prophage; predicted antitermination protein                  | -1.09 |
| b0551 | ybcQ | Isolate 2 | non-essential | DLP12 prophage; predicted antitermination protein                  | 1.03  |
| b0553 | nmpC | Isolate 1 | *             | DLP12 prophage; truncated outer membrane porin (pseudogene)        | -0.88 |
| b0553 | nmpC | Isolate 2 | *             | DLP12 prophage; truncated outer membrane porin (pseudogene)        | 0.72  |
| b0554 | essD | Isolate 1 | non-essential | DLP12 prophage; predicted phage lysis protein                      | -1.11 |
| b0554 | essD | Isolate 2 | non-essential | DLP12 prophage; predicted phage lysis protein                      | -1.26 |
| b0555 | ybcS | Isolate 1 | non-essential | DLP12 prophage; predicted lysozyme                                 | 2.71  |
| b0555 | ybcS | Isolate 2 | non-essential | DLP12 prophage; predicted lysozyme                                 | -0.35 |
| b0556 | rzpD | Isolate 1 | non-essential | DLP12 prophage; predicted murein endopeptidase                     | -2.57 |
| b0556 | rzpD | Isolate 2 | non-essential | DLP12 prophage; predicted murein endopeptidase                     | -0.66 |
| b0557 | borD | Isolate 1 | non-essential | DLP12 prophage; predicted lipoprotein                              | 1.71  |
| b0557 | borD | Isolate 2 | non-essential | DLP12 prophage; predicted lipoprotein                              | 0.79  |
| b0558 | ybcV | Isolate 1 | non-essential | DLP12 prophage; predicted protein                                  | 2.27  |
| b0558 | ybcV | Isolate 2 | non-essential | DLP12 prophage; predicted protein                                  | 2.60  |
| b0559 | ybcW | Isolate 1 | non-essential | DLP12 prophage; predicted protein                                  | -1.27 |
| b0559 | ybcW | Isolate 2 | non-essential | DLP12 prophage; predicted protein                                  | -1.72 |
| b0560 | nohB | Isolate 1 | non-essential | DLP12 prophage; DNA packaging protein                              | 1.34  |
| b0560 | nohB | Isolate 2 | non-essential | DLP12 prophage; DNA packaging protein                              | -1.29 |
| b0561 | tfaD | Isolate 1 | *             | DLP12 prophage; predicted tail fiber assembly protein (pseudogene) | 0.00  |
| b0561 | tfaD | Isolate 2 | *             | DLP12 prophage; predicted tail fiber assembly protein (pseudogene) | 0.54  |

|       |      |           |               |                                                                                           |       |
|-------|------|-----------|---------------|-------------------------------------------------------------------------------------------|-------|
| b0562 | ybcY | Isolate 1 | non-essential | DLP12 prophage; predicted SAM-dependent methyltransferase                                 | -1.22 |
| b0562 | ybcY | Isolate 2 | non-essential | DLP12 prophage; predicted SAM-dependent methyltransferase                                 | -1.02 |
| b0563 | ylcE | Isolate 1 | non-essential | DLP12 prophage; predicted protein                                                         | -0.39 |
| b0563 | ylcE | Isolate 2 | non-essential | DLP12 prophage; predicted protein                                                         | 1.09  |
| b0564 | appY | Isolate 1 | non-essential | DLP12 prophage; DNA-binding transcriptional activator                                     | 0.19  |
| b0564 | appY | Isolate 2 | non-essential | DLP12 prophage; DNA-binding transcriptional activator                                     | 1.77  |
| b0565 | ompT | Isolate 1 | non-essential | DLP12 prophage; outer membrane protease VII (outer membrane protein 3b)                   | 0.25  |
| b0565 | ompT | Isolate 2 | non-essential | DLP12 prophage; outer membrane protease VII (outer membrane protein 3b)                   | -0.20 |
| b0566 | envY | Isolate 1 | non-essential | DNA-binding transcriptional activator                                                     | 0.85  |
| b0566 | envY | Isolate 2 | non-essential | DNA-binding transcriptional activator                                                     | 0.26  |
| b0567 | ybcH | Isolate 1 | non-essential | predicted protein                                                                         | -0.09 |
| b0567 | ybcH | Isolate 2 | non-essential | predicted protein                                                                         | 0.87  |
| b0568 | nfrA | Isolate 1 | non-essential | bacteriophage N4 receptor, outer membrane subunit                                         | 0.54  |
| b0568 | nfrA | Isolate 2 | non-essential | bacteriophage N4 receptor, outer membrane subunit                                         | 1.10  |
| b0569 | nfrB | Isolate 1 | non-essential | bacteriophage N4 receptor, inner membrane subunit                                         | 2.21  |
| b0569 | nfrB | Isolate 2 | non-essential | bacteriophage N4 receptor, inner membrane subunit                                         | 2.23  |
| b0570 | cusS | Isolate 1 | non-essential | sensory histidine kinase in two-component regulatory system with CusR, senses copper ions | 0.72  |
| b0570 | cusS | Isolate 2 | non-essential | sensory histidine kinase in two-component regulatory system with CusR, senses copper ions | -1.28 |
| b0571 | cusR | Isolate 1 | non-essential | DNA-binding response regulator in two-component regulatory system with CusS               | -0.76 |
| b0571 | cusR | Isolate 2 | non-essential | DNA-binding response regulator in two-component regulatory system with CusS               | -0.79 |
| b0572 | cusC | Isolate 1 | non-essential | copper/silver efflux system, outer membrane component                                     | 0.95  |
| b0572 | cusC | Isolate 2 | non-essential | copper/silver efflux system, outer membrane component                                     | -0.48 |
| b0573 | cusF | Isolate 1 | non-essential | periplasmic copper-binding protein                                                        | 1.11  |
| b0573 | cusF | Isolate 2 | non-essential | periplasmic copper-binding protein                                                        | 1.10  |
| b0574 | cusB | Isolate 1 | non-essential | copper/silver efflux system, membrane fusion protein                                      | 1.98  |
| b0574 | cusB | Isolate 2 | non-essential | copper/silver efflux system, membrane fusion protein                                      | 0.82  |
| b0575 | cusA | Isolate 1 | non-essential | copper/silver efflux system, membrane component                                           | -0.72 |
| b0575 | cusA | Isolate 2 | non-essential | copper/silver efflux system, membrane component                                           | -0.58 |
| b0576 | pheP | Isolate 1 | non-essential | phenylalanine transporter                                                                 | 2.91  |
| b0576 | pheP | Isolate 2 | non-essential | phenylalanine transporter                                                                 | 1.88  |
| b0577 | ybdG | Isolate 1 | non-essential | predicted mechanosensitive channel                                                        | 0.26  |
| b0577 | ybdG | Isolate 2 | non-essential | predicted mechanosensitive channel                                                        | 1.43  |
| b0578 | nfnB | Isolate 1 | non-essential | dihydropteridine reductase, NAD(P)H-dependent, oxygen-insensitive                         | -0.88 |
| b0578 | nfnB | Isolate 2 | non-essential | dihydropteridine reductase, NAD(P)H-dependent, oxygen-insensitive                         | 0.02  |
| b0579 | ybdF | Isolate 1 | non-essential | conserved protein                                                                         | 1.32  |
| b0579 | ybdF | Isolate 2 | non-essential | conserved protein                                                                         | 2.69  |
| b0580 | ybdJ | Isolate 1 | non-essential | predicted inner membrane protein                                                          | 1.75  |
| b0580 | ybdJ | Isolate 2 | non-essential | predicted inner membrane protein                                                          | 0.70  |
| b0581 | ybdK | Isolate 1 | non-essential | gamma-glutamyl:cysteine ligase                                                            | -0.08 |
| b0581 | ybdK | Isolate 2 | non-essential | gamma-glutamyl:cysteine ligase                                                            | -1.08 |
| b0584 | fepA | Isolate 1 | non-essential | iron-enterobactin outer membrane transporter                                              | 2.02  |
| b0584 | fepA | Isolate 2 | non-essential | iron-enterobactin outer membrane transporter                                              | 3.13  |
| b0585 | fes  | Isolate 1 | non-essential | enterobactin/ferric enterobactin esterase                                                 | 0.67  |



|       |      |           |               |                                                                                            |       |
|-------|------|-----------|---------------|--------------------------------------------------------------------------------------------|-------|
| b0585 | fes  | Isolate 2 | non-essential | enterobactin/ferric enterobactin esterase                                                  | -3.75 |
| b0586 | entF | Isolate 1 | non-essential | enterobactin synthase multienzyme complex component, ATP-dependent                         | 0.01  |
| b0586 | entF | Isolate 2 | non-essential | enterobactin synthase multienzyme complex component, ATP-dependent                         | 0.00  |
| b0587 | fepE | Isolate 1 | non-essential | regulator of length of O-antigen component of lipopolysaccharide chains                    | 1.39  |
| b0587 | fepE | Isolate 2 | non-essential | regulator of length of O-antigen component of lipopolysaccharide chains                    | 0.73  |
| b0588 | fepC | Isolate 1 | non-essential | iron-enterobactin transporter subunit -!- ATP-binding component of ABC superfamily         | -1.73 |
| b0588 | fepC | Isolate 2 | non-essential | iron-enterobactin transporter subunit -!- ATP-binding component of ABC superfamily         | -3.65 |
| b0589 | fepG | Isolate 1 | non-essential | iron-enterobactin transporter subunit -!- membrane component of ABC superfamily            | -1.64 |
| b0589 | fepG | Isolate 2 | non-essential | iron-enterobactin transporter subunit -!- membrane component of ABC superfamily            | -2.23 |
| b0590 | fepD | Isolate 1 | non-essential | iron-enterobactin transporter subunit -!- membrane component of ABC superfamily            | -1.61 |
| b0590 | fepD | Isolate 2 | non-essential | iron-enterobactin transporter subunit -!- membrane component of ABC superfamily            | -0.10 |
| b0592 | fepB | Isolate 1 | non-essential | iron-enterobactin transporter subunit -!- periplasmic-binding component of ABC superfamily | -0.13 |
| b0592 | fepB | Isolate 2 | non-essential | iron-enterobactin transporter subunit -!- periplasmic-binding component of ABC superfamily | -1.28 |
| b0593 | entC | Isolate 1 | non-essential | isochorismate synthase 1                                                                   | 0.37  |
| b0593 | entC | Isolate 2 | non-essential | isochorismate synthase 1                                                                   | 0.67  |
| b0594 | entE | Isolate 1 | non-essential | 2,3-dihydroxybenzoate-AMP ligase component of enterobactin synthase multienzyme complex    | -1.04 |
| b0594 | entE | Isolate 2 | non-essential | 2,3-dihydroxybenzoate-AMP ligase component of enterobactin synthase multienzyme complex    | -2.25 |
| b0595 | entB | Isolate 1 | non-essential | isochorismatase                                                                            | -0.98 |
| b0595 | entB | Isolate 2 | non-essential | isochorismatase                                                                            | -2.31 |
| b0596 | entA | Isolate 1 | non-essential | 2,3-dihydro-2,3-dihydroxybenzoate dehydrogenase                                            | 0.16  |
| b0596 | entA | Isolate 2 | non-essential | 2,3-dihydro-2,3-dihydroxybenzoate dehydrogenase                                            | -0.96 |
| b0597 | ybdB | Isolate 1 | non-essential | conserved protein                                                                          | 0.38  |
| b0597 | ybdB | Isolate 2 | non-essential | conserved protein                                                                          | 0.10  |
| b0598 | cstA | Isolate 1 | non-essential | carbon starvation protein                                                                  | 1.25  |
| b0598 | cstA | Isolate 2 | non-essential | carbon starvation protein                                                                  | 0.05  |
| b0599 | ybdH | Isolate 1 | non-essential | predicted oxidoreductase                                                                   | 0.78  |
| b0599 | ybdH | Isolate 2 | non-essential | predicted oxidoreductase                                                                   | 1.53  |
| b0600 | ybdL | Isolate 1 | non-essential | methionine aminotransferase, PLP-dependent                                                 | -1.49 |
| b0600 | ybdL | Isolate 2 | non-essential | methionine aminotransferase, PLP-dependent                                                 | 0.59  |
| b0601 | ybdM | Isolate 1 | non-essential | conserved protein                                                                          | -0.92 |
| b0601 | ybdM | Isolate 2 | non-essential | conserved protein                                                                          | -1.22 |
| b0602 | ybdN | Isolate 1 | non-essential | conserved protein                                                                          | -0.81 |
| b0602 | ybdN | Isolate 2 | non-essential | conserved protein                                                                          | -1.60 |
| b0603 | ybdO | Isolate 1 | non-essential | predicted DNA-binding transcriptional regulator                                            | -1.21 |
| b0603 | ybdO | Isolate 2 | non-essential | predicted DNA-binding transcriptional regulator                                            | 0.80  |
| b0604 | dsbG | Isolate 1 | non-essential | periplasmic disulfide isomerase/thiol-disulphide oxidase                                   | 2.36  |
| b0604 | dsbG | Isolate 2 | non-essential | periplasmic disulfide isomerase/thiol-disulphide oxidase                                   | 1.36  |
| b0605 | ahpC | Isolate 1 | non-essential | alkyl hydroperoxide reductase, C22 subunit                                                 | -1.11 |
| b0605 | ahpC | Isolate 2 | non-essential | alkyl hydroperoxide reductase, C22 subunit                                                 | -0.38 |
| b0606 | ahpF | Isolate 1 | non-essential | alkyl hydroperoxide reductase, F52a subunit, FAD/NAD(P)-binding                            | -1.02 |
| b0606 | ahpF | Isolate 2 | non-essential | alkyl hydroperoxide reductase, F52a subunit, FAD/NAD(P)-binding                            | 1.23  |
| b0607 | uspG | Isolate 1 | non-essential | universal stress protein UPI2                                                              | 0.92  |
| b0607 | uspG | Isolate 2 | non-essential | universal stress protein UPI2                                                              | 0.25  |

|       |      |           |               |                                                                             |       |
|-------|------|-----------|---------------|-----------------------------------------------------------------------------|-------|
| b0608 | ybdR | Isolate 1 | non-essential | predicted oxidoreductase, Zn-dependent and NAD(P)-binding                   | -0.21 |
| b0608 | ybdR | Isolate 2 | non-essential | predicted oxidoreductase, Zn-dependent and NAD(P)-binding                   | -1.51 |
| b0610 | rnk  | Isolate 1 | non-essential | regulator of nucleoside diphosphate kinase                                  | 0.09  |
| b0610 | rnk  | Isolate 2 | non-essential | regulator of nucleoside diphosphate kinase                                  | -1.28 |
| b0611 | rna  | Isolate 1 | non-essential | ribonuclease I                                                              | -2.07 |
| b0611 | rna  | Isolate 2 | non-essential | ribonuclease I                                                              | 0.89  |
| b0612 | citT | Isolate 1 | non-essential | citrate:succinate antiporter                                                | 1.80  |
| b0612 | citT | Isolate 2 | non-essential | citrate:succinate antiporter                                                | 0.29  |
| b0613 | citG | Isolate 1 | non-essential | triphosphoribosyl-dephospho-CoA transferase                                 | 0.45  |
| b0613 | citG | Isolate 2 | non-essential | triphosphoribosyl-dephospho-CoA transferase                                 | -0.90 |
| b0614 | citX | Isolate 1 | non-essential | apo-citrate lyase phosphoribosyl-dephospho-CoA transferase                  | -2.68 |
| b0614 | citX | Isolate 2 | non-essential | apo-citrate lyase phosphoribosyl-dephospho-CoA transferase                  | -1.64 |
| b0615 | citF | Isolate 1 | non-essential | citrate lyase, citrate-ACP transferase (alpha) subunit                      | 1.55  |
| b0615 | citF | Isolate 2 | non-essential | citrate lyase, citrate-ACP transferase (alpha) subunit                      | 0.17  |
| b0616 | citE | Isolate 1 | non-essential | citrate lyase, citryl-ACP lyase (beta) subunit                              | -0.63 |
| b0616 | citE | Isolate 2 | non-essential | citrate lyase, citryl-ACP lyase (beta) subunit                              | 0.18  |
| b0617 | citD | Isolate 1 | non-essential | citrate lyase, acyl carrier (gamma) subunit                                 | 0.88  |
| b0617 | citD | Isolate 2 | non-essential | citrate lyase, acyl carrier (gamma) subunit                                 | 1.01  |
| b0618 | citC | Isolate 1 | non-essential | citrate lyase synthetase                                                    | 0.58  |
| b0618 | citC | Isolate 2 | non-essential | citrate lyase synthetase                                                    | -0.46 |
| b0619 | citA | Isolate 1 | non-essential | sensory histidine kinase in two-component regulatory system with citB       | -1.06 |
| b0619 | citA | Isolate 2 | non-essential | sensory histidine kinase in two-component regulatory system with citB       | 0.70  |
| b0620 | citB | Isolate 1 | non-essential | DNA-binding response regulator in two-component regulatory system with citA | 1.64  |
| b0620 | citB | Isolate 2 | non-essential | DNA-binding response regulator in two-component regulatory system with citA | 0.02  |
| b0621 | dcuC | Isolate 1 | unknown       | anaerobic C4-dicarboxylate transport                                        | -1.12 |
| b0621 | dcuC | Isolate 2 | unknown       | anaerobic C4-dicarboxylate transport                                        | 1.42  |
| b0622 | crcA | Isolate 1 | non-essential | palmitoyl transferase for Lipid A                                           | -0.17 |
| b0622 | crcA | Isolate 2 | non-essential | palmitoyl transferase for Lipid A                                           | 0.86  |
| b0623 | cspE | Isolate 1 | non-essential | DNA-binding transcriptional repressor                                       | 0.44  |
| b0623 | cspE | Isolate 2 | non-essential | DNA-binding transcriptional repressor                                       | -0.34 |
| b0624 | crcB | Isolate 1 | non-essential | predicted inner membrane protein associated with chromosome condensation    | 0.00  |
| b0624 | crcB | Isolate 2 | non-essential | predicted inner membrane protein associated with chromosome condensation    | -0.16 |
| b0625 | ybeH | Isolate 1 | non-essential | predicted protein                                                           | -1.81 |
| b0625 | ybeH | Isolate 2 | non-essential | predicted protein                                                           | 0.02  |
| b0626 | ybeM | Isolate 1 | non-essential | predicted C-N hydrolase superfamily, NAD(P)-binding amidase/nitrilase       | 0.78  |
| b0626 | ybeM | Isolate 2 | non-essential | predicted C-N hydrolase superfamily, NAD(P)-binding amidase/nitrilase       | -1.51 |
| b0627 | tatE | Isolate 1 | non-essential | TatABCE protein translocation system subunit                                | 1.42  |
| b0627 | tatE | Isolate 2 | non-essential | TatABCE protein translocation system subunit                                | 0.22  |
| b0628 | lipA | Isolate 1 | non-essential | lipoate synthase                                                            | 4.60  |
| b0628 | lipA | Isolate 2 | non-essential | lipoate synthase                                                            | 5.87  |
| b0629 | ybeF | Isolate 1 | non-essential | predicted DNA-binding transcriptional regulator                             | 0.87  |
| b0629 | ybeF | Isolate 2 | non-essential | predicted DNA-binding transcriptional regulator                             | -1.47 |
| b0630 | lipB | Isolate 1 | non-essential | lipoyl-protein ligase                                                       | 2.25  |

|       |      |           |               |                                                                                                  |       |
|-------|------|-----------|---------------|--------------------------------------------------------------------------------------------------|-------|
| b0630 | lipB | Isolate 2 | non-essential | lipoyl-protein ligase                                                                            | 2.38  |
| b0631 | ybeD | Isolate 1 | non-essential | conserved protein                                                                                | 1.41  |
| b0631 | ybeD | Isolate 2 | non-essential | conserved protein                                                                                | 0.74  |
| b0632 | dacA | Isolate 1 | non-essential | D-alanyl-D-alanine carboxypeptidase (penicillin-binding protein 5)                               | -0.89 |
| b0632 | dacA | Isolate 2 | non-essential | D-alanyl-D-alanine carboxypeptidase (penicillin-binding protein 5)                               | 0.08  |
| b0633 | rlpA | Isolate 1 | non-essential | minor lipoprotein                                                                                | 0.83  |
| b0633 | rlpA | Isolate 2 | non-essential | minor lipoprotein                                                                                | 0.64  |
| b0636 | ybeA | Isolate 1 | non-essential | conserved protein                                                                                | 1.09  |
| b0636 | ybeA | Isolate 2 | non-essential | conserved protein                                                                                | -0.40 |
| b0637 | ybeB | Isolate 1 | non-essential | predicted protein                                                                                | -0.92 |
| b0637 | ybeB | Isolate 2 | non-essential | predicted protein                                                                                | -1.94 |
| b0638 | cobC | Isolate 1 | non-essential | predicted alpha-ribazole-5'-P phosphatase                                                        | 0.60  |
| b0638 | cobC | Isolate 2 | non-essential | predicted alpha-ribazole-5'-P phosphatase                                                        | 2.96  |
| b0640 | holA | Isolate 1 | essential     | DNA polymerase III, delta subunit                                                                | -1.94 |
| b0642 | leuS | Isolate 1 | essential     | leucyl-tRNA synthetase                                                                           | 0.85  |
| b0643 | ybeL | Isolate 1 | non-essential | conserved protein                                                                                | 0.61  |
| b0643 | ybeL | Isolate 2 | non-essential | conserved protein                                                                                | -1.05 |
| b0644 | ybeQ | Isolate 1 | non-essential | conserved protein                                                                                | 1.53  |
| b0644 | ybeQ | Isolate 2 | non-essential | conserved protein                                                                                | 0.37  |
| b0645 | ybeR | Isolate 1 | non-essential | predicted protein                                                                                | -0.32 |
| b0645 | ybeR | Isolate 2 | non-essential | predicted protein                                                                                | -1.68 |
| b0646 | djIB | Isolate 1 | non-essential | predicted chaperone                                                                              | 0.37  |
| b0646 | djIB | Isolate 2 | non-essential | predicted chaperone                                                                              | 1.14  |
| b0647 | ybeT | Isolate 1 | non-essential | conserved outer membrane protein                                                                 | 0.14  |
| b0647 | ybeT | Isolate 2 | non-essential | conserved outer membrane protein                                                                 | -1.81 |
| b0648 | ybeU | Isolate 1 | non-essential | predicted tRNA ligase                                                                            | 0.77  |
| b0648 | ybeU | Isolate 2 | non-essential | predicted tRNA ligase                                                                            | 0.00  |
| b0649 | djIC | Isolate 1 | non-essential | Hsc56 co-chaperone of HscC                                                                       | 0.35  |
| b0649 | djIC | Isolate 2 | non-essential | Hsc56 co-chaperone of HscC                                                                       | -0.35 |
| b0650 | hscC | Isolate 1 | non-essential | Hsp70 family chaperone Hsc62, binds to RpoD and inhibits transcription                           | 1.21  |
| b0650 | hscC | Isolate 2 | non-essential | Hsp70 family chaperone Hsc62, binds to RpoD and inhibits transcription                           | 0.61  |
| b0651 | rihA | Isolate 1 | non-essential | ribonucleoside hydrolase 1                                                                       | -0.80 |
| b0651 | rihA | Isolate 2 | non-essential | ribonucleoside hydrolase 1                                                                       | 0.81  |
| b0652 | gltL | Isolate 1 | non-essential | glutamate and aspartate transporter subunit -!- ATP-binding component of ABC superfamily         | -0.26 |
| b0652 | gltL | Isolate 2 | non-essential | glutamate and aspartate transporter subunit -!- ATP-binding component of ABC superfamily         | -0.69 |
| b0653 | gltK | Isolate 1 | non-essential | glutamate and aspartate transporter subunit -!- membrane component of ABC superfamily            | -2.17 |
| b0653 | gltK | Isolate 2 | non-essential | glutamate and aspartate transporter subunit -!- membrane component of ABC superfamily            | -1.88 |
| b0654 | gltJ | Isolate 1 | non-essential | glutamate and aspartate transporter subunit -!- membrane component of ABC superfamily            | 0.20  |
| b0654 | gltJ | Isolate 2 | non-essential | glutamate and aspartate transporter subunit -!- membrane component of ABC superfamily            | 0.72  |
| b0655 | gltI | Isolate 1 | non-essential | glutamate and aspartate transporter subunit -!- periplasmic-binding component of ABC superfamily | 0.83  |
| b0655 | gltI | Isolate 2 | non-essential | glutamate and aspartate transporter subunit -!- periplasmic-binding component of ABC superfamily | 2.18  |
| b0658 | ybeX | Isolate 1 | non-essential | predicted ion transport                                                                          | 1.82  |
| b0658 | ybeX | Isolate 2 | non-essential | predicted ion transport                                                                          | 1.09  |

|         |      |           |               |                                                                 |       |
|---------|------|-----------|---------------|-----------------------------------------------------------------|-------|
| b0659   | ybeY | Isolate 1 | non-essential | conserved protein                                               | 2.66  |
| b0659   | ybeY | Isolate 2 | non-essential | conserved protein                                               | 6.38  |
| b0660   | ybeZ | Isolate 1 | non-essential | predicted protein with nucleoside triphosphate hydrolase domain | 1.54  |
| b0660   | ybeZ | Isolate 2 | non-essential | predicted protein with nucleoside triphosphate hydrolase domain | 1.33  |
| b0661   | miaB | Isolate 1 | non-essential | isopentenyl-adenosine A37 tRNA methylthiolase                   | 0.21  |
| b0661   | miaB | Isolate 2 | non-essential | isopentenyl-adenosine A37 tRNA methylthiolase                   | 0.70  |
| b0662   | ubiF | Isolate 1 | non-essential | 2-octaprenyl-3-methyl-6-methoxy-1,4-benzoquinol oxygenase       | 2.49  |
| b0662   | ubiF | Isolate 2 | non-essential | 2-octaprenyl-3-methyl-6-methoxy-1,4-benzoquinol oxygenase       | 1.91  |
| b0674   | asnB | Isolate 1 | non-essential | asparagine synthetase B                                         | -0.46 |
| b0674   | asnB | Isolate 2 | non-essential | asparagine synthetase B                                         | -0.80 |
| b0675   | nagD | Isolate 1 | non-essential | UMP phosphatase                                                 | -0.15 |
| b0675   | nagD | Isolate 2 | non-essential | UMP phosphatase                                                 | -0.52 |
| b0676   | nagC | Isolate 1 | non-essential | DNA-binding transcriptional dual regulator                      | -0.02 |
| b0676   | nagC | Isolate 2 | non-essential | DNA-binding transcriptional dual regulator                      | 0.41  |
| b0677   | nagA | Isolate 1 | non-essential | N-acetylglucosamine-6-phosphate deacetylase                     | -1.05 |
| b0677   | nagA | Isolate 2 | non-essential | N-acetylglucosamine-6-phosphate deacetylase                     | -1.46 |
| b0678   | nagB | Isolate 1 | non-essential | glucosamine-6-phosphate deaminase                               | -2.92 |
| b0678   | nagB | Isolate 2 | non-essential | glucosamine-6-phosphate deaminase                               | -0.04 |
| b0679   | nagE | Isolate 1 | non-essential | fused N-acetyl glucosamine specific PTS enzyme IICBA components | -1.14 |
| b0679   | nagE | Isolate 2 | non-essential | fused N-acetyl glucosamine specific PTS enzyme IICBA components | 0.47  |
| b0680   | glnS | Isolate 1 | essential     | glutamyl-tRNA synthetase                                        | -0.19 |
| b0681   | ybfM | Isolate 1 | non-essential | predicted outer membrane porin                                  | 0.18  |
| b0681   | ybfM | Isolate 2 | non-essential | predicted outer membrane porin                                  | 5.25  |
| b0682   | ybfN | Isolate 1 | non-essential | predicted lipoprotein                                           | 0.69  |
| b0682   | ybfN | Isolate 2 | non-essential | predicted lipoprotein                                           | 0.35  |
| b0683   | fur  | Isolate 1 | non-essential | DNA-binding transcriptional dual regulator                      | 2.31  |
| b0683   | fur  | Isolate 2 | non-essential | DNA-binding transcriptional dual regulator                      | 3.47  |
| b0683.1 | *    | Isolate 1 | *             | *                                                               | 2.67  |
| b0683.1 | *    | Isolate 2 | *             | *                                                               | 0.16  |
| b0684   | fldA | Isolate 1 | essential     | flavodoxin 1                                                    | 1.36  |
| b0685   | ybfE | Isolate 1 | non-essential | LexA regulated protein                                          | 0.03  |
| b0685   | ybfE | Isolate 2 | non-essential | LexA regulated protein                                          | -0.69 |
| b0686   | ybfF | Isolate 1 | non-essential | conserved protein                                               | 1.13  |
| b0686   | ybfF | Isolate 2 | non-essential | conserved protein                                               | 1.25  |
| b0687   | seqA | Isolate 1 | non-essential | regulatory protein for replication initiation                   | 0.11  |
| b0687   | seqA | Isolate 2 | non-essential | regulatory protein for replication initiation                   | 1.00  |
| b0688   | pgm  | Isolate 1 | non-essential | phosphoglucomutase                                              | -0.89 |
| b0688   | pgm  | Isolate 2 | non-essential | phosphoglucomutase                                              | 0.41  |
| b0689   | ybfP | Isolate 1 | non-essential | predicted protein                                               | -0.11 |
| b0689   | ybfP | Isolate 2 | non-essential | predicted protein                                               | -1.59 |
| b0690   | ybfG | Isolate 1 | non-essential | predicted protein                                               | -1.96 |
| b0690   | ybfG | Isolate 2 | non-essential | predicted protein                                               | 0.12  |
| b0691   | ybfH | Isolate 1 | non-essential | predicted protein                                               | -0.33 |

|         |      |           |               |                                                                             |       |
|---------|------|-----------|---------------|-----------------------------------------------------------------------------|-------|
| b0691   | ybfH | Isolate 2 | non-essential | predicted protein                                                           | -1.57 |
| b0692   | potE | Isolate 1 | non-essential | putrescine/proton symporter -!- putrescine/ornithine antiporter             | 0.27  |
| b0692   | potE | Isolate 2 | non-essential | putrescine/proton symporter -!- putrescine/ornithine antiporter             | -0.42 |
| b0693   | speF | Isolate 1 | non-essential | ornithine decarboxylase isozyme, inducible                                  | -1.33 |
| b0693   | speF | Isolate 2 | non-essential | ornithine decarboxylase isozyme, inducible                                  | -0.82 |
| b0693.1 | *    | Isolate 1 | *             | *                                                                           | 0.38  |
| b0693.1 | *    | Isolate 2 | *             | *                                                                           | 0.85  |
| b0694   | kdpE | Isolate 1 | non-essential | DNA-binding response regulator in two-component regulatory system with KdpD | 1.58  |
| b0694   | kdpE | Isolate 2 | non-essential | DNA-binding response regulator in two-component regulatory system with KdpD | 0.43  |
| b0695   | kdpD | Isolate 1 | non-essential | fused sensory histidine kinase in two-component regulatory system with KdpE | 1.01  |
| b0695   | kdpD | Isolate 2 | non-essential | fused sensory histidine kinase in two-component regulatory system with KdpE | 0.53  |
| b0696   | kdpC | Isolate 1 | non-essential | potassium translocating ATPase, subunit C                                   | -0.09 |
| b0696   | kdpC | Isolate 2 | non-essential | potassium translocating ATPase, subunit C                                   | 2.09  |
| b0697   | kdpB | Isolate 1 | non-essential | potassium translocating ATPase, subunit B                                   | -0.22 |
| b0697   | kdpB | Isolate 2 | non-essential | potassium translocating ATPase, subunit B                                   | -0.10 |
| b0698   | kdpA | Isolate 1 | non-essential | potassium translocating ATPase, subunit A                                   | 2.33  |
| b0698   | kdpA | Isolate 2 | non-essential | potassium translocating ATPase, subunit A                                   | 1.35  |
| b0699   | ybfA | Isolate 1 | non-essential | predicted protein                                                           | 0.55  |
| b0699   | ybfA | Isolate 2 | non-essential | predicted protein                                                           | -0.08 |
| b0700   | rhsC | Isolate 1 | non-essential | rhsC element core protein RshC                                              | 1.10  |
| b0700   | rhsC | Isolate 2 | non-essential | rhsC element core protein RshC                                              | -1.48 |
| b0702   | ybfB | Isolate 1 | non-essential | predicted inner membrane protein                                            | 0.41  |
| b0702   | ybfB | Isolate 2 | non-essential | predicted inner membrane protein                                            | 0.77  |
| b0703   | ybfO | Isolate 1 | non-essential | conserved protein, rhs-like                                                 | -1.11 |
| b0703   | ybfO | Isolate 2 | non-essential | conserved protein, rhs-like                                                 | 0.27  |
| b0704   | ybfC | Isolate 1 | non-essential | predicted protein                                                           | 1.26  |
| b0704   | ybfC | Isolate 2 | non-essential | predicted protein                                                           | -0.05 |
| b0705   | ybfL | Isolate 1 | *             | predicted transposase (pseudogene)                                          | 0.18  |
| b0705   | ybfL | Isolate 2 | *             | predicted transposase (pseudogene)                                          | 1.21  |
| b0706   | ybfD | Isolate 1 | non-essential | conserved protein                                                           | 1.35  |
| b0706   | ybfD | Isolate 2 | non-essential | conserved protein                                                           | 0.93  |
| b0707   | ybgA | Isolate 1 | non-essential | conserved protein                                                           | 1.67  |
| b0707   | ybgA | Isolate 2 | non-essential | conserved protein                                                           | 0.61  |
| b0708   | phr  | Isolate 1 | non-essential | deoxyribodipyrimidine photolyase, FAD-binding                               | 0.25  |
| b0708   | phr  | Isolate 2 | non-essential | deoxyribodipyrimidine photolyase, FAD-binding                               | 0.00  |
| b0709   | ybgH | Isolate 1 | non-essential | predicted transporter                                                       | 1.24  |
| b0709   | ybgH | Isolate 2 | non-essential | predicted transporter                                                       | 0.40  |
| b0710   | ybgI | Isolate 1 | non-essential | conserved metal-binding protein                                             | -1.15 |
| b0710   | ybgI | Isolate 2 | non-essential | conserved metal-binding protein                                             | 0.52  |
| b0711   | ybgJ | Isolate 1 | non-essential | predicted enzyme subunit                                                    | 0.72  |
| b0711   | ybgJ | Isolate 2 | non-essential | predicted enzyme subunit                                                    | 1.11  |
| b0712   | ybgK | Isolate 1 | non-essential | predicted enzyme subunit                                                    | -0.48 |
| b0712   | ybgK | Isolate 2 | non-essential | predicted enzyme subunit                                                    | -0.13 |

|       |      |           |               |                                                                            |       |
|-------|------|-----------|---------------|----------------------------------------------------------------------------|-------|
| b0713 | ybgL | Isolate 1 | non-essential | predicted lactam utilization protein                                       | -0.35 |
| b0713 | ybgL | Isolate 2 | non-essential | predicted lactam utilization protein                                       | -0.65 |
| b0714 | nei  | Isolate 1 | non-essential | endonuclease VIII -!- 5-formyluracil/5-hydroxymethyluracil DNA glycosylase | -1.21 |
| b0714 | nei  | Isolate 2 | non-essential | endonuclease VIII -!- 5-formyluracil/5-hydroxymethyluracil DNA glycosylase | -0.77 |
| b0715 | abrB | Isolate 1 | non-essential | predicted regulator                                                        | 1.16  |
| b0715 | abrB | Isolate 2 | non-essential | predicted regulator                                                        | 0.24  |
| b0716 | ybgO | Isolate 1 | non-essential | predicted fimbrial-like adhesin protein                                    | 1.67  |
| b0716 | ybgO | Isolate 2 | non-essential | predicted fimbrial-like adhesin protein                                    | 0.19  |
| b0717 | ybgP | Isolate 1 | non-essential | predicted assembly protein                                                 | -0.01 |
| b0717 | ybgP | Isolate 2 | non-essential | predicted assembly protein                                                 | 0.43  |
| b0718 | ybgQ | Isolate 1 | non-essential | predicted outer membrane protein                                           | 0.24  |
| b0718 | ybgQ | Isolate 2 | non-essential | predicted outer membrane protein                                           | -0.03 |
| b0719 | ybgD | Isolate 1 | non-essential | predicted fimbrial-like adhesin protein                                    | -0.82 |
| b0719 | ybgD | Isolate 2 | non-essential | predicted fimbrial-like adhesin protein                                    | -0.20 |
| b0720 | gltA | Isolate 1 | non-essential | citrate synthase                                                           | -0.46 |
| b0720 | gltA | Isolate 2 | non-essential | citrate synthase                                                           | -2.05 |
| b0721 | sdhC | Isolate 1 | non-essential | succinate dehydrogenase, membrane subunit, binds cytochrome b556           | 0.69  |
| b0721 | sdhC | Isolate 2 | non-essential | succinate dehydrogenase, membrane subunit, binds cytochrome b556           | 1.32  |
| b0722 | sdhD | Isolate 1 | non-essential | succinate dehydrogenase, membrane subunit, binds cytochrome b556           | 0.49  |
| b0722 | sdhD | Isolate 2 | non-essential | succinate dehydrogenase, membrane subunit, binds cytochrome b556           | 2.60  |
| b0723 | sdhA | Isolate 1 | non-essential | succinate dehydrogenase, flavoprotein subunit                              | -1.59 |
| b0723 | sdhA | Isolate 2 | non-essential | succinate dehydrogenase, flavoprotein subunit                              | -0.19 |
| b0724 | sdhB | Isolate 1 | non-essential | succinate dehydrogenase, FeS subunit                                       | -1.78 |
| b0724 | sdhB | Isolate 2 | non-essential | succinate dehydrogenase, FeS subunit                                       | -1.00 |
| b0726 | sucA | Isolate 1 | non-essential | 2-oxoglutarate decarboxylase, thiamin-requiring                            | 0.30  |
| b0726 | sucA | Isolate 2 | non-essential | 2-oxoglutarate decarboxylase, thiamin-requiring                            | 1.31  |
| b0727 | sucB | Isolate 1 | non-essential | dihydrolipoyltranssuccinase                                                | 0.82  |
| b0727 | sucB | Isolate 2 | non-essential | dihydrolipoyltranssuccinase                                                | 0.71  |
| b0728 | sucC | Isolate 1 | non-essential | succinyl-CoA synthetase, beta subunit                                      | 1.40  |
| b0728 | sucC | Isolate 2 | non-essential | succinyl-CoA synthetase, beta subunit                                      | -0.96 |
| b0729 | sucD | Isolate 1 | non-essential | succinyl-CoA synthetase, NAD(P)-binding, alpha subunit                     | 1.20  |
| b0729 | sucD | Isolate 2 | non-essential | succinyl-CoA synthetase, NAD(P)-binding, alpha subunit                     | 1.71  |
| b0730 | mngR | Isolate 1 | non-essential | DNA-binding transcriptional dual regulator, fatty-acyl-binding             | 0.51  |
| b0730 | mngR | Isolate 2 | non-essential | DNA-binding transcriptional dual regulator, fatty-acyl-binding             | 0.50  |
| b0731 | mngA | Isolate 1 | non-essential | fused 2-O-a-mannosyl-D-glycerate specific PTS enzyme IIABC components      | -0.88 |
| b0731 | mngA | Isolate 2 | non-essential | fused 2-O-a-mannosyl-D-glycerate specific PTS enzyme IIABC components      | -0.30 |
| b0732 | mngB | Isolate 1 | non-essential | alpha-mannosidase                                                          | 0.76  |
| b0732 | mngB | Isolate 2 | non-essential | alpha-mannosidase                                                          | -0.37 |
| b0733 | cydA | Isolate 1 | essential     | cytochrome d terminal oxidase, subunit I                                   | 0.51  |
| b0734 | cydB | Isolate 1 | non-essential | cytochrome d terminal oxidase, subunit II                                  | 2.36  |
| b0734 | cydB | Isolate 2 | non-essential | cytochrome d terminal oxidase, subunit II                                  | 0.35  |
| b0735 | ybgE | Isolate 1 | non-essential | conserved inner membrane protein                                           | -2.20 |
| b0735 | ybgE | Isolate 2 | non-essential | conserved inner membrane protein                                           | -0.83 |

|       |      |           |               |                                                                                       |       |
|-------|------|-----------|---------------|---------------------------------------------------------------------------------------|-------|
| b0736 | ybgC | Isolate 1 | non-essential | predicted acyl-CoA thioesterase                                                       | 5.02  |
| b0736 | ybgC | Isolate 2 | non-essential | predicted acyl-CoA thioesterase                                                       | 1.13  |
| b0737 | tolQ | Isolate 1 | non-essential | membrane spanning protein in TolA-TolQ-TolR complex                                   | -1.25 |
| b0737 | tolQ | Isolate 2 | non-essential | membrane spanning protein in TolA-TolQ-TolR complex                                   | 0.75  |
| b0738 | tolR | Isolate 1 | non-essential | membrane spanning protein in TolA-TolQ-TolR complex                                   | 0.24  |
| b0738 | tolR | Isolate 2 | non-essential | membrane spanning protein in TolA-TolQ-TolR complex                                   | 2.03  |
| b0739 | tolA | Isolate 1 | non-essential | membrane anchored protein in TolA-TolQ-TolR complex                                   | -1.44 |
| b0739 | tolA | Isolate 2 | non-essential | membrane anchored protein in TolA-TolQ-TolR complex                                   | 2.02  |
| b0740 | tolB | Isolate 1 | non-essential | periplasmic protein                                                                   | 0.49  |
| b0740 | tolB | Isolate 2 | non-essential | periplasmic protein                                                                   | 2.04  |
| b0741 | pal  | Isolate 1 | non-essential | peptidoglycan-associated outer membrane lipoprotein                                   | -1.63 |
| b0741 | pal  | Isolate 2 | non-essential | peptidoglycan-associated outer membrane lipoprotein                                   | -1.09 |
| b0742 | ybgF | Isolate 1 | non-essential | predicted protein                                                                     | 0.60  |
| b0742 | ybgF | Isolate 2 | non-essential | predicted protein                                                                     | -0.77 |
| b0750 | nadA | Isolate 1 | non-essential | quinolinate synthase, subunit A                                                       | -0.42 |
| b0750 | nadA | Isolate 2 | non-essential | quinolinate synthase, subunit A                                                       | -0.02 |
| b0751 | pnuC | Isolate 1 | non-essential | predicted nicotinamide mononucleotide transporter                                     | 0.77  |
| b0751 | pnuC | Isolate 2 | non-essential | predicted nicotinamide mononucleotide transporter                                     | 0.94  |
| b0752 | zitB | Isolate 1 | non-essential | zinc efflux system                                                                    | 0.87  |
| b0752 | zitB | Isolate 2 | non-essential | zinc efflux system                                                                    | 0.59  |
| b0753 | ybgS | Isolate 1 | non-essential | conserved protein                                                                     | -1.07 |
| b0753 | ybgS | Isolate 2 | non-essential | conserved protein                                                                     | 0.53  |
| b0754 | aroG | Isolate 1 | non-essential | 3-deoxy-D-arabino-heptulosonate-7-phosphate synthase, phenylalanine repressible       | -0.25 |
| b0754 | aroG | Isolate 2 | non-essential | 3-deoxy-D-arabino-heptulosonate-7-phosphate synthase, phenylalanine repressible       | 0.01  |
| b0756 | galM | Isolate 1 | non-essential | galactose-1-epimerase (mutarotase)                                                    | 2.15  |
| b0756 | galM | Isolate 2 | non-essential | galactose-1-epimerase (mutarotase)                                                    | -1.12 |
| b0757 | galK | Isolate 1 | non-essential | galactokinase                                                                         | -0.13 |
| b0757 | galK | Isolate 2 | non-essential | galactokinase                                                                         | 0.45  |
| b0758 | galT | Isolate 1 | non-essential | galactose-1-phosphate uridylyltransferase                                             | 1.95  |
| b0758 | galT | Isolate 2 | non-essential | galactose-1-phosphate uridylyltransferase                                             | 0.47  |
| b0759 | galE | Isolate 1 | non-essential | UDP-galactose-4-epimerase                                                             | -0.72 |
| b0759 | galE | Isolate 2 | non-essential | UDP-galactose-4-epimerase                                                             | -1.66 |
| b0760 | modF | Isolate 1 | non-essential | fused subunits of molybdate transporter -!- ATP-binding components of ABC superfamily | -0.22 |
| b0760 | modF | Isolate 2 | non-essential | fused subunits of molybdate transporter -!- ATP-binding components of ABC superfamily | -1.36 |
| b0761 | modE | Isolate 1 | non-essential | DNA-binding transcriptional dual regulator                                            | -0.05 |
| b0761 | modE | Isolate 2 | non-essential | DNA-binding transcriptional dual regulator                                            | -0.55 |
| b0762 | ybhT | Isolate 1 | non-essential | predicted protein                                                                     | -0.09 |
| b0762 | ybhT | Isolate 2 | non-essential | predicted protein                                                                     | 1.48  |
| b0763 | modA | Isolate 1 | non-essential | molybdate transporter subunit -!- periplasmic-binding component of ABC superfamily    | -0.03 |
| b0763 | modA | Isolate 2 | non-essential | molybdate transporter subunit -!- periplasmic-binding component of ABC superfamily    | -0.32 |
| b0764 | modB | Isolate 1 | non-essential | molybdate transporter subunit -!- membrane component of ABC superfamily               | -0.13 |
| b0764 | modB | Isolate 2 | non-essential | molybdate transporter subunit -!- membrane component of ABC superfamily               | -0.53 |
| b0765 | modC | Isolate 1 | non-essential | molybdate transporter subunit -!- ATP-binding component of ABC superfamily            | 3.56  |

|       |      |           |               |                                                                             |       |
|-------|------|-----------|---------------|-----------------------------------------------------------------------------|-------|
| b0765 | modC | Isolate 2 | non-essential | molybdate transporter subunit -!- ATP-binding component of ABC superfamily  | -1.22 |
| b0766 | ybhA | Isolate 1 | non-essential | predicted hydrolase                                                         | -0.65 |
| b0766 | ybhA | Isolate 2 | non-essential | predicted hydrolase                                                         | -2.55 |
| b0767 | ybhE | Isolate 1 | non-essential | 6-phosphogluconolactonase                                                   | -0.27 |
| b0767 | ybhE | Isolate 2 | non-essential | 6-phosphogluconolactonase                                                   | 0.55  |
| b0768 | ybhD | Isolate 1 | non-essential | predicted DNA-binding transcriptional regulator                             | -0.94 |
| b0768 | ybhD | Isolate 2 | non-essential | predicted DNA-binding transcriptional regulator                             | -0.19 |
| b0769 | ybhH | Isolate 1 | non-essential | conserved protein                                                           | -0.23 |
| b0769 | ybhH | Isolate 2 | non-essential | conserved protein                                                           | -0.81 |
| b0770 | ybhI | Isolate 1 | non-essential | predicted transporter                                                       | 1.86  |
| b0770 | ybhI | Isolate 2 | non-essential | predicted transporter                                                       | 0.07  |
| b0771 | ybhJ | Isolate 1 | non-essential | predicted hydratase                                                         | 2.37  |
| b0771 | ybhJ | Isolate 2 | non-essential | predicted hydratase                                                         | -0.18 |
| b0772 | ybhC | Isolate 1 | non-essential | predicted pectinesterase                                                    | -1.30 |
| b0772 | ybhC | Isolate 2 | non-essential | predicted pectinesterase                                                    | 1.32  |
| b0773 | ybhB | Isolate 1 | non-essential | predicted kinase inhibitor                                                  | -3.36 |
| b0773 | ybhB | Isolate 2 | non-essential | predicted kinase inhibitor                                                  | -2.54 |
| b0774 | bioA | Isolate 1 | non-essential | 7,8-diaminopelargonic acid synthase, PLP-dependent                          | -0.01 |
| b0774 | bioA | Isolate 2 | non-essential | 7,8-diaminopelargonic acid synthase, PLP-dependent                          | -1.87 |
| b0775 | bioB | Isolate 1 | non-essential | biotin synthase                                                             | 2.04  |
| b0775 | bioB | Isolate 2 | non-essential | biotin synthase                                                             | 1.21  |
| b0776 | bioF | Isolate 1 | non-essential | 8-amino-7-oxononanoate synthase                                             | 0.86  |
| b0776 | bioF | Isolate 2 | non-essential | 8-amino-7-oxononanoate synthase                                             | 0.53  |
| b0777 | bioC | Isolate 1 | non-essential | predicted methyltransferase, enzyme of biotin synthesis                     | -0.43 |
| b0777 | bioC | Isolate 2 | non-essential | predicted methyltransferase, enzyme of biotin synthesis                     | 1.46  |
| b0778 | bioD | Isolate 1 | non-essential | dethiobiotin synthetase                                                     | -1.08 |
| b0778 | bioD | Isolate 2 | non-essential | dethiobiotin synthetase                                                     | 1.88  |
| b0779 | uvrB | Isolate 1 | non-essential | excinulease of nucleotide excision repair, DNA damage recognition component | -0.12 |
| b0779 | uvrB | Isolate 2 | non-essential | excinulease of nucleotide excision repair, DNA damage recognition component | 0.97  |
| b0780 | ybhK | Isolate 1 | non-essential | predicted transferase with NAD(P)-binding Rossmann-fold domain              | -0.23 |
| b0780 | ybhK | Isolate 2 | non-essential | predicted transferase with NAD(P)-binding Rossmann-fold domain              | -0.81 |
| b0781 | moaA | Isolate 1 | non-essential | molybdopterin biosynthesis protein A                                        | -0.21 |
| b0781 | moaA | Isolate 2 | non-essential | molybdopterin biosynthesis protein A                                        | -1.12 |
| b0782 | moaB | Isolate 1 | non-essential | molybdopterin biosynthesis protein B                                        | 0.61  |
| b0782 | moaB | Isolate 2 | non-essential | molybdopterin biosynthesis protein B                                        | -0.79 |
| b0783 | moaC | Isolate 1 | non-essential | molybdopterin biosynthesis, protein C                                       | 0.17  |
| b0783 | moaC | Isolate 2 | non-essential | molybdopterin biosynthesis, protein C                                       | 0.30  |
| b0784 | moaD | Isolate 1 | non-essential | molybdopterin synthase, small subunit                                       | 0.22  |
| b0784 | moaD | Isolate 2 | non-essential | molybdopterin synthase, small subunit                                       | 1.01  |
| b0785 | moaE | Isolate 1 | non-essential | molybdopterin synthase, large subunit                                       | 0.22  |
| b0785 | moaE | Isolate 2 | non-essential | molybdopterin synthase, large subunit                                       | 0.94  |
| b0786 | ybhL | Isolate 1 | non-essential | predicted inner membrane protein                                            | 2.34  |
| b0786 | ybhL | Isolate 2 | non-essential | predicted inner membrane protein                                            | 0.53  |



|       |      |           |               |                                                                                    |       |
|-------|------|-----------|---------------|------------------------------------------------------------------------------------|-------|
| b0787 | ybhM | Isolate 1 | non-essential | conserved inner membrane protein                                                   | -0.59 |
| b0787 | ybhM | Isolate 2 | non-essential | conserved inner membrane protein                                                   | 1.56  |
| b0788 | ybhN | Isolate 1 | non-essential | conserved inner membrane protein                                                   | 0.39  |
| b0788 | ybhN | Isolate 2 | non-essential | conserved inner membrane protein                                                   | -0.50 |
| b0789 | ybhO | Isolate 1 | non-essential | cardiolipin synthase 2                                                             | -0.57 |
| b0789 | ybhO | Isolate 2 | non-essential | cardiolipin synthase 2                                                             | 2.40  |
| b0790 | ybhP | Isolate 1 | non-essential | predicted DNase                                                                    | -2.92 |
| b0790 | ybhP | Isolate 2 | non-essential | predicted DNase                                                                    | 0.44  |
| b0791 | ybhQ | Isolate 1 | non-essential | predicted inner membrane protein                                                   | 0.64  |
| b0791 | ybhQ | Isolate 2 | non-essential | predicted inner membrane protein                                                   | -0.56 |
| b0792 | ybhR | Isolate 1 | non-essential | predicted transporter subunit -!- membrane component of ABC superfamily            | -1.33 |
| b0792 | ybhR | Isolate 2 | non-essential | predicted transporter subunit -!- membrane component of ABC superfamily            | -0.06 |
| b0793 | ybhS | Isolate 1 | non-essential | predicted transporter subunit -!- membrane component of ABC superfamily            | -1.78 |
| b0793 | ybhS | Isolate 2 | non-essential | predicted transporter subunit -!- membrane component of ABC superfamily            | -0.39 |
| b0794 | ybhF | Isolate 1 | non-essential | fused predicted transporter subunits -!- ATP-binding components of ABC superfamily | 0.22  |
| b0794 | ybhF | Isolate 2 | non-essential | fused predicted transporter subunits -!- ATP-binding components of ABC superfamily | 0.14  |
| b0795 | ybhG | Isolate 1 | non-essential | predicted membrane fusion protein (MFP) component of efflux pump, membrane anchor  | 1.04  |
| b0795 | ybhG | Isolate 2 | non-essential | predicted membrane fusion protein (MFP) component of efflux pump, membrane anchor  | 1.71  |
| b0796 | ybiH | Isolate 1 | non-essential | predicted DNA-binding transcriptional regulator                                    | -0.22 |
| b0796 | ybiH | Isolate 2 | non-essential | predicted DNA-binding transcriptional regulator                                    | -1.28 |
| b0797 | rhIE | Isolate 1 | non-essential | RNA helicase                                                                       | 2.39  |
| b0797 | rhIE | Isolate 2 | non-essential | RNA helicase                                                                       | 0.89  |
| b0798 | ybiA | Isolate 1 | non-essential | conserved protein                                                                  | -0.82 |
| b0798 | ybiA | Isolate 2 | non-essential | conserved protein                                                                  | -0.59 |
| b0799 | dinG | Isolate 1 | non-essential | ATP-dependent DNA helicase                                                         | -1.41 |
| b0799 | dinG | Isolate 2 | non-essential | ATP-dependent DNA helicase                                                         | -0.08 |
| b0800 | ybiB | Isolate 1 | non-essential | predicted transferase/phosphorylase                                                | 1.19  |
| b0800 | ybiB | Isolate 2 | non-essential | predicted transferase/phosphorylase                                                | 0.70  |
| b0801 | ybiC | Isolate 1 | non-essential | predicted dehydrogenase                                                            | -0.49 |
| b0801 | ybiC | Isolate 2 | non-essential | predicted dehydrogenase                                                            | -0.53 |
| b0802 | ybiJ | Isolate 1 | non-essential | predicted protein                                                                  | 0.86  |
| b0802 | ybiJ | Isolate 2 | non-essential | predicted protein                                                                  | -1.02 |
| b0803 | ybiI | Isolate 1 | non-essential | conserved protein                                                                  | -0.19 |
| b0803 | ybiI | Isolate 2 | non-essential | conserved protein                                                                  | -0.03 |
| b0804 | ybiX | Isolate 1 | non-essential | conserved protein                                                                  | -0.60 |
| b0804 | ybiX | Isolate 2 | non-essential | conserved protein                                                                  | -1.70 |
| b0805 | fiu  | Isolate 1 | non-essential | predicted iron outer membrane transporter                                          | -1.62 |
| b0805 | fiu  | Isolate 2 | non-essential | predicted iron outer membrane transporter                                          | 0.57  |
| b0806 | ybiM | Isolate 1 | non-essential | predicted protein                                                                  | 0.37  |
| b0806 | ybiM | Isolate 2 | non-essential | predicted protein                                                                  | -0.20 |
| b0807 | ybiN | Isolate 1 | non-essential | predicted SAM-dependent methyltransferase                                          | -0.18 |
| b0807 | ybiN | Isolate 2 | non-essential | predicted SAM-dependent methyltransferase                                          | -0.51 |
| b0808 | ybiO | Isolate 1 | non-essential | predicted mechanosensitive channel                                                 | -1.32 |

|       |      |           |               |                                                                                            |       |
|-------|------|-----------|---------------|--------------------------------------------------------------------------------------------|-------|
| b0808 | ybiO | Isolate 2 | non-essential | predicted mechanosensitive channel                                                         | 0.64  |
| b0809 | glnQ | Isolate 1 | non-essential | glutamine transporter subunit -!- ATP-binding component of ABC superfamily                 | 1.13  |
| b0809 | glnQ | Isolate 2 | non-essential | glutamine transporter subunit -!- ATP-binding component of ABC superfamily                 | 0.19  |
| b0810 | glnP | Isolate 1 | non-essential | glutamine transporter subunit -!- membrane component of ABC superfamily                    | 0.53  |
| b0810 | glnP | Isolate 2 | non-essential | glutamine transporter subunit -!- membrane component of ABC superfamily                    | 1.21  |
| b0811 | glnH | Isolate 1 | non-essential | glutamine transporter subunit -!- periplasmic binding component of ABC superfamily         | 0.15  |
| b0811 | glnH | Isolate 2 | non-essential | glutamine transporter subunit -!- periplasmic binding component of ABC superfamily         | 0.21  |
| b0812 | dps  | Isolate 1 | non-essential | Fe-binding and storage protein                                                             | 3.57  |
| b0812 | dps  | Isolate 2 | non-essential | Fe-binding and storage protein                                                             | -0.91 |
| b0813 | rhtA | Isolate 1 | non-essential | threonine and homoserine efflux system                                                     | -1.34 |
| b0813 | rhtA | Isolate 2 | non-essential | threonine and homoserine efflux system                                                     | 0.94  |
| b0814 | ompX | Isolate 1 | non-essential | outer membrane protein                                                                     | 0.88  |
| b0814 | ompX | Isolate 2 | non-essential | outer membrane protein                                                                     | 3.68  |
| b0815 | ybiP | Isolate 1 | non-essential | predicted hydrolase, inner membrane                                                        | 1.36  |
| b0815 | ybiP | Isolate 2 | non-essential | predicted hydrolase, inner membrane                                                        | 1.35  |
| b0817 | mntR | Isolate 1 | non-essential | transcriptional regulator of mntH                                                          | -0.46 |
| b0817 | mntR | Isolate 2 | non-essential | transcriptional regulator of mntH                                                          | 1.69  |
| b0818 | ybiR | Isolate 1 | non-essential | predicted transporter                                                                      | -0.48 |
| b0818 | ybiR | Isolate 2 | non-essential | predicted transporter                                                                      | 1.73  |
| b0819 | ybiS | Isolate 1 | non-essential | conserved protein                                                                          | -0.58 |
| b0819 | ybiS | Isolate 2 | non-essential | conserved protein                                                                          | 0.72  |
| b0820 | ybiT | Isolate 1 | non-essential | fused predicted transporter subunits -!- ATP-binding components of ABC superfamily         | -1.94 |
| b0820 | ybiT | Isolate 2 | non-essential | fused predicted transporter subunits -!- ATP-binding components of ABC superfamily         | -0.97 |
| b0821 | ybiU | Isolate 1 | non-essential | predicted protein                                                                          | 0.16  |
| b0821 | ybiU | Isolate 2 | non-essential | predicted protein                                                                          | 2.59  |
| b0822 | ybiV | Isolate 1 | non-essential | predicted hydrolase                                                                        | 1.08  |
| b0822 | ybiV | Isolate 2 | non-essential | predicted hydrolase                                                                        | 2.16  |
| b0823 | ybiW | Isolate 1 | non-essential | predicted pyruvate formate lyase                                                           | -0.06 |
| b0823 | ybiW | Isolate 2 | non-essential | predicted pyruvate formate lyase                                                           | 0.40  |
| b0824 | ybiY | Isolate 1 | non-essential | predicted pyruvate formate lyase activating enzyme                                         | -0.74 |
| b0824 | ybiY | Isolate 2 | non-essential | predicted pyruvate formate lyase activating enzyme                                         | -0.84 |
| b0825 | fsaA | Isolate 1 | non-essential | fructose-6-phosphate aldolase 1                                                            | 0.50  |
| b0825 | fsaA | Isolate 2 | non-essential | fructose-6-phosphate aldolase 1                                                            | 0.72  |
| b0826 | moeB | Isolate 1 | non-essential | molybdopterin synthase sulfurylase                                                         | -0.05 |
| b0826 | moeB | Isolate 2 | non-essential | molybdopterin synthase sulfurylase                                                         | 0.22  |
| b0827 | moeA | Isolate 1 | non-essential | molybdopterin biosynthesis protein                                                         | 1.78  |
| b0827 | moeA | Isolate 2 | non-essential | molybdopterin biosynthesis protein                                                         | 0.57  |
| b0828 | iaaA | Isolate 1 | non-essential | L-asparaginase                                                                             | -0.44 |
| b0828 | iaaA | Isolate 2 | non-essential | L-asparaginase                                                                             | -0.82 |
| b0829 | yliA | Isolate 1 | non-essential | fused predicted peptide transport subunits -!- ATP-binding components of ABC superfamily   | -1.87 |
| b0829 | yliA | Isolate 2 | non-essential | fused predicted peptide transport subunits -!- ATP-binding components of ABC superfamily   | -3.26 |
| b0830 | yliB | Isolate 1 | non-essential | predicted peptide transporter subunit -!- periplasmic-binding component of ABC superfamily | 1.09  |
| b0830 | yliB | Isolate 2 | non-essential | predicted peptide transporter subunit -!- periplasmic-binding component of ABC superfamily | 0.22  |

|       |      |           |               |                                                                                 |       |
|-------|------|-----------|---------------|---------------------------------------------------------------------------------|-------|
| b0831 | yliC | Isolate 1 | non-essential | predicted peptide transporter subunit -!- membrane component of ABC superfamily | -0.25 |
| b0831 | yliC | Isolate 2 | non-essential | predicted peptide transporter subunit -!- membrane component of ABC superfamily | 0.33  |
| b0832 | yliD | Isolate 1 | non-essential | predicted peptide transporter subunit -!- membrane component of ABC superfamily | 0.15  |
| b0832 | yliD | Isolate 2 | non-essential | predicted peptide transporter subunit -!- membrane component of ABC superfamily | -0.42 |
| b0833 | yliE | Isolate 1 | non-essential | conserved inner membrane protein                                                | 0.11  |
| b0833 | yliE | Isolate 2 | non-essential | conserved inner membrane protein                                                | 1.28  |
| b0834 | yliF | Isolate 1 | non-essential | predicted diguanylate cyclase                                                   | 1.09  |
| b0834 | yliF | Isolate 2 | non-essential | predicted diguanylate cyclase                                                   | -0.11 |
| b0835 | yliG | Isolate 1 | non-essential | predicted SAM-dependent methyltransferase                                       | -1.39 |
| b0835 | yliG | Isolate 2 | non-essential | predicted SAM-dependent methyltransferase                                       | 0.93  |
| b0836 | yliH | Isolate 1 | non-essential | conserved protein                                                               | 0.91  |
| b0836 | yliH | Isolate 2 | non-essential | conserved protein                                                               | 0.13  |
| b0837 | yliI | Isolate 1 | non-essential | predicted dehydrogenase                                                         | -0.53 |
| b0837 | yliI | Isolate 2 | non-essential | predicted dehydrogenase                                                         | -0.61 |
| b0838 | yliJ | Isolate 1 | non-essential | predicted glutathione S-transferase                                             | 1.06  |
| b0838 | yliJ | Isolate 2 | non-essential | predicted glutathione S-transferase                                             | -0.41 |
| b0839 | dacC | Isolate 1 | non-essential | D-alanyl-D-alanine carboxypeptidase (penicillin-binding protein 6a)             | 1.45  |
| b0839 | dacC | Isolate 2 | non-essential | D-alanyl-D-alanine carboxypeptidase (penicillin-binding protein 6a)             | -1.22 |
| b0840 | deoR | Isolate 1 | non-essential | DNA-binding transcriptional repressor                                           | 1.21  |
| b0840 | deoR | Isolate 2 | non-essential | DNA-binding transcriptional repressor                                           | 1.46  |
| b0841 | ybjG | Isolate 1 | non-essential | undecaprenyl pyrophosphate phosphatase                                          | -1.18 |
| b0841 | ybjG | Isolate 2 | non-essential | undecaprenyl pyrophosphate phosphatase                                          | 1.02  |
| b0842 | cmr  | Isolate 1 | non-essential | multidrug efflux system protein                                                 | -0.34 |
| b0842 | cmr  | Isolate 2 | non-essential | multidrug efflux system protein                                                 | 0.88  |
| b0843 | ybjH | Isolate 1 | non-essential | predicted protein                                                               | -1.30 |
| b0843 | ybjH | Isolate 2 | non-essential | predicted protein                                                               | 0.28  |
| b0844 | ybjI | Isolate 1 | non-essential | conserved protein                                                               | 0.72  |
| b0844 | ybjI | Isolate 2 | non-essential | conserved protein                                                               | 0.48  |
| b0845 | ybjJ | Isolate 1 | non-essential | predicted transporter                                                           | 1.21  |
| b0845 | ybjJ | Isolate 2 | non-essential | predicted transporter                                                           | 1.41  |
| b0846 | ybjK | Isolate 1 | non-essential | predicted DNA-binding transcriptional regulator                                 | 2.27  |
| b0846 | ybjK | Isolate 2 | non-essential | predicted DNA-binding transcriptional regulator                                 | 0.63  |
| b0847 | ybjL | Isolate 1 | non-essential | predicted transporter                                                           | -1.27 |
| b0847 | ybjL | Isolate 2 | non-essential | predicted transporter                                                           | 0.07  |
| b0848 | ybjM | Isolate 1 | non-essential | predicted inner membrane protein                                                | 1.22  |
| b0848 | ybjM | Isolate 2 | non-essential | predicted inner membrane protein                                                | -1.18 |
| b0849 | grxA | Isolate 1 | non-essential | glutaredoxin 1, redox coenzyme for ribonucleotide reductase (RNR1a)             | 1.29  |
| b0849 | grxA | Isolate 2 | non-essential | glutaredoxin 1, redox coenzyme for ribonucleotide reductase (RNR1a)             | 0.83  |
| b0850 | ybjC | Isolate 1 | non-essential | predicted inner membrane protein                                                | -1.53 |
| b0850 | ybjC | Isolate 2 | non-essential | predicted inner membrane protein                                                | 0.15  |
| b0851 | nfsA | Isolate 1 | non-essential | nitroreductase A, NADPH-dependent, FMN-dependent                                | 0.68  |
| b0851 | nfsA | Isolate 2 | non-essential | nitroreductase A, NADPH-dependent, FMN-dependent                                | 0.56  |
| b0852 | rimK | Isolate 1 | non-essential | ribosomal protein S6 modification protein                                       | -0.09 |

|       |      |           |               |                                                                                     |       |
|-------|------|-----------|---------------|-------------------------------------------------------------------------------------|-------|
| b0852 | rimK | Isolate 2 | non-essential | ribosomal protein S6 modification protein                                           | 1.66  |
| b0853 | ybjN | Isolate 1 | non-essential | predicted oxidoreductase                                                            | -1.80 |
| b0853 | ybjN | Isolate 2 | non-essential | predicted oxidoreductase                                                            | 2.16  |
| b0854 | potF | Isolate 1 | non-essential | putrescine transporter subunit -!- periplasmic-binding component of ABC superfamily | -0.67 |
| b0854 | potF | Isolate 2 | non-essential | putrescine transporter subunit -!- periplasmic-binding component of ABC superfamily | 0.59  |
| b0855 | potG | Isolate 1 | non-essential | putrescine transporter subunit -!- ATP-binding component of ABC superfamily         | 0.20  |
| b0855 | potG | Isolate 2 | non-essential | putrescine transporter subunit -!- ATP-binding component of ABC superfamily         | -0.18 |
| b0856 | potH | Isolate 1 | non-essential | putrescine transporter subunit -!- membrane component of ABC superfamily            | 0.25  |
| b0856 | potH | Isolate 2 | non-essential | putrescine transporter subunit -!- membrane component of ABC superfamily            | -0.22 |
| b0857 | potI | Isolate 1 | non-essential | putrescine transporter subunit -!- membrane component of ABC superfamily            | 0.13  |
| b0857 | potI | Isolate 2 | non-essential | putrescine transporter subunit -!- membrane component of ABC superfamily            | -0.08 |
| b0858 | ybjO | Isolate 1 | non-essential | predicted inner membrane protein                                                    | 0.15  |
| b0858 | ybjO | Isolate 2 | non-essential | predicted inner membrane protein                                                    | -0.40 |
| b0859 | rumB | Isolate 1 | non-essential | 23S rRNA m(5)U747 methyltransferase                                                 | 2.34  |
| b0859 | rumB | Isolate 2 | non-essential | 23S rRNA m(5)U747 methyltransferase                                                 | 1.65  |
| b0860 | artJ | Isolate 1 | non-essential | arginine transporter subunit -!- periplasmic-binding component of ABC superfamily   | -0.81 |
| b0860 | artJ | Isolate 2 | non-essential | arginine transporter subunit -!- periplasmic-binding component of ABC superfamily   | -1.05 |
| b0861 | artM | Isolate 1 | non-essential | arginine transporter subunit -!- membrane component of ABC superfamily              | 0.83  |
| b0861 | artM | Isolate 2 | non-essential | arginine transporter subunit -!- membrane component of ABC superfamily              | 1.88  |
| b0862 | artQ | Isolate 1 | non-essential | arginine transporter subunit -!-membrane component of ABC superfamily               | 1.39  |
| b0862 | artQ | Isolate 2 | non-essential | arginine transporter subunit -!-membrane component of ABC superfamily               | 0.72  |
| b0863 | artI | Isolate 1 | non-essential | arginine transporter subunit -!- periplasmic-binding component of ABC superfamily   | 1.78  |
| b0863 | artI | Isolate 2 | non-essential | arginine transporter subunit -!- periplasmic-binding component of ABC superfamily   | 1.00  |
| b0864 | artP | Isolate 1 | non-essential | arginine transporter subunit -!- ATP-binding component of ABC superfamily           | -0.53 |
| b0864 | artP | Isolate 2 | non-essential | arginine transporter subunit -!- ATP-binding component of ABC superfamily           | -0.77 |
| b0865 | ybjP | Isolate 1 | non-essential | predicted lipoprotein                                                               | 0.19  |
| b0865 | ybjP | Isolate 2 | non-essential | predicted lipoprotein                                                               | 0.86  |
| b0866 | ybjQ | Isolate 1 | non-essential | conserved protein                                                                   | 0.14  |
| b0866 | ybjQ | Isolate 2 | non-essential | conserved protein                                                                   | 0.02  |
| b0867 | ybjR | Isolate 1 | non-essential | predicted amidase and lipoprotein                                                   | -0.39 |
| b0867 | ybjR | Isolate 2 | non-essential | predicted amidase and lipoprotein                                                   | -0.05 |
| b0868 | ybjS | Isolate 1 | non-essential | predicted NAD(P)H oxidoreductase with NAD(P)-binding Rossmann-fold domain           | -0.29 |
| b0868 | ybjS | Isolate 2 | non-essential | predicted NAD(P)H oxidoreductase with NAD(P)-binding Rossmann-fold domain           | 1.87  |
| b0869 | ybjT | Isolate 1 | non-essential | conserved protein with NAD(P)-binding Rossmann-fold domain                          | -0.16 |
| b0869 | ybjT | Isolate 2 | non-essential | conserved protein with NAD(P)-binding Rossmann-fold domain                          | 1.48  |
| b0870 | ltaE | Isolate 1 | non-essential | L-allo-threonine aldolase, PLP-dependent                                            | -0.40 |
| b0870 | ltaE | Isolate 2 | non-essential | L-allo-threonine aldolase, PLP-dependent                                            | 0.21  |
| b0871 | poxB | Isolate 1 | non-essential | pyruvate dehydrogenase (pyruvate oxidase), thiamin-dependent, FAD-binding           | -2.78 |
| b0871 | poxB | Isolate 2 | non-essential | pyruvate dehydrogenase (pyruvate oxidase), thiamin-dependent, FAD-binding           | -1.29 |
| b0872 | hcr  | Isolate 1 | non-essential | HCP oxidoreductase, NADH-dependent                                                  | 1.31  |
| b0872 | hcr  | Isolate 2 | non-essential | HCP oxidoreductase, NADH-dependent                                                  | 0.60  |
| b0873 | hcp  | Isolate 1 | non-essential | hybrid-cluster [4Fe-2S-2O] protein in anaerobic terminal reductases                 | 0.10  |
| b0873 | hcp  | Isolate 2 | non-essential | hybrid-cluster [4Fe-2S-2O] protein in anaerobic terminal reductases                 | 1.21  |

|       |      |           |               |                                                                                                          |       |
|-------|------|-----------|---------------|----------------------------------------------------------------------------------------------------------|-------|
| b0874 | ybjE | Isolate 1 | non-essential | predicted transporter                                                                                    | -0.38 |
| b0874 | ybjE | Isolate 2 | non-essential | predicted transporter                                                                                    | -0.92 |
| b0875 | aqpZ | Isolate 1 | non-essential | aquaporin                                                                                                | 0.13  |
| b0875 | aqpZ | Isolate 2 | non-essential | aquaporin                                                                                                | -0.08 |
| b0876 | ybjD | Isolate 1 | non-essential | conserved protein with nucleoside triphosphate hydrolase domain                                          | -1.31 |
| b0876 | ybjD | Isolate 2 | non-essential | conserved protein with nucleoside triphosphate hydrolase domain                                          | -0.06 |
| b0877 | ybjX | Isolate 1 | non-essential | conserved protein                                                                                        | -0.69 |
| b0877 | ybjX | Isolate 2 | non-essential | conserved protein                                                                                        | 0.21  |
| b0878 | macA | Isolate 1 | non-essential | macrolide transporter subunit, membrane fusion protein (MFP) component                                   | 1.13  |
| b0878 | macA | Isolate 2 | non-essential | macrolide transporter subunit, membrane fusion protein (MFP) component                                   | -0.07 |
| b0879 | macB | Isolate 1 | non-essential | fused macrolide transporter subunits -!- ATP-binding component and membrane component of ABC superfamily | 1.00  |
| b0879 | macB | Isolate 2 | non-essential | fused macrolide transporter subunits -!- ATP-binding component and membrane component of ABC superfamily | 0.08  |
| b0880 | cspD | Isolate 1 | non-essential | cold shock protein homolog                                                                               | -1.05 |
| b0880 | cspD | Isolate 2 | non-essential | cold shock protein homolog                                                                               | 1.62  |
| b0881 | clpS | Isolate 1 | non-essential | regulatory protein for ClpA substrate specificity                                                        | -0.60 |
| b0881 | clpS | Isolate 2 | non-essential | regulatory protein for ClpA substrate specificity                                                        | -0.57 |
| b0882 | clpA | Isolate 1 | non-essential | ATPase and specificity subunit of ClpA-ClpP ATP-dependent serine protease, chaperone activity            | -1.33 |
| b0882 | clpA | Isolate 2 | non-essential | ATPase and specificity subunit of ClpA-ClpP ATP-dependent serine protease, chaperone activity            | -0.56 |
| b0884 | infA | Isolate 1 | essential     | translation initiation factor IF-1                                                                       | -0.25 |
| b0885 | aat  | Isolate 1 | non-essential | leucyl/phenylalanyl-tRNA-protein transferase                                                             | 0.52  |
| b0885 | aat  | Isolate 2 | non-essential | leucyl/phenylalanyl-tRNA-protein transferase                                                             | 1.81  |
| b0886 | cydC | Isolate 1 | essential     | fused cysteine transporter subunits -!- membrane component and ATP-binding component of ABC superfamily  | -0.08 |
| b0887 | cydD | Isolate 1 | non-essential | fused cysteine transporter subunits -!- membrane component and ATP-binding component of ABC superfamily  | -0.11 |
| b0887 | cydD | Isolate 2 | non-essential | fused cysteine transporter subunits -!- membrane component and ATP-binding component of ABC superfamily  | -1.32 |
| b0888 | trxB | Isolate 1 | non-essential | thioredoxin reductase, FAD/NAD(P)-binding                                                                | 3.00  |
| b0888 | trxB | Isolate 2 | non-essential | thioredoxin reductase, FAD/NAD(P)-binding                                                                | -0.72 |
| b0889 | lrp  | Isolate 1 | non-essential | DNA-binding transcriptional dual regulator, leucine-binding                                              | 0.56  |
| b0889 | lrp  | Isolate 2 | non-essential | DNA-binding transcriptional dual regulator, leucine-binding                                              | 1.20  |
| b0890 | ftsK | Isolate 1 | essential     | DNA-binding membrane protein required for chromosome resolution and partitioning                         | -1.41 |
| b0891 | lolA | Isolate 1 | essential     | chaperone for lipoproteins                                                                               | -2.25 |
| b0892 | ycaJ | Isolate 1 | non-essential | recombination protein                                                                                    | 0.39  |
| b0892 | ycaJ | Isolate 2 | non-essential | recombination protein                                                                                    | -0.90 |
| b0893 | serS | Isolate 1 | essential     | seryl-tRNA synthetase, also charges selenocysteinyl-tRNA with serine                                     | -1.68 |
| b0894 | dmsA | Isolate 1 | non-essential | dimethyl sulfoxide reductase, anaerobic, subunit A                                                       | -2.03 |
| b0894 | dmsA | Isolate 2 | non-essential | dimethyl sulfoxide reductase, anaerobic, subunit A                                                       | 1.45  |
| b0895 | dmsB | Isolate 1 | non-essential | dimethyl sulfoxide reductase, anaerobic, subunit B                                                       | -2.36 |
| b0895 | dmsB | Isolate 2 | non-essential | dimethyl sulfoxide reductase, anaerobic, subunit B                                                       | -0.15 |
| b0896 | dmsC | Isolate 1 | non-essential | dimethyl sulfoxide reductase, anaerobic, subunit C                                                       | -1.95 |
| b0896 | dmsC | Isolate 2 | non-essential | dimethyl sulfoxide reductase, anaerobic, subunit C                                                       | 0.96  |
| b0897 | ycaC | Isolate 1 | non-essential | predicted hydrolase                                                                                      | -0.40 |
| b0897 | ycaC | Isolate 2 | non-essential | predicted hydrolase                                                                                      | -0.90 |
| b0898 | ycaD | Isolate 1 | non-essential | predicted transporter                                                                                    | 1.38  |
| b0898 | ycaD | Isolate 2 | non-essential | predicted transporter                                                                                    | -0.09 |

|       |      |           |               |                                                                       |       |
|-------|------|-----------|---------------|-----------------------------------------------------------------------|-------|
| b0899 | ycaM | Isolate 1 | non-essential | predicted transporter                                                 | 0.64  |
| b0899 | ycaM | Isolate 2 | non-essential | predicted transporter                                                 | -0.09 |
| b0900 | ycaN | Isolate 1 | non-essential | predicted DNA-binding transcriptional regulator                       | 2.78  |
| b0900 | ycaN | Isolate 2 | non-essential | predicted DNA-binding transcriptional regulator                       | -1.69 |
| b0901 | ycaK | Isolate 1 | non-essential | conserved protein                                                     | 0.30  |
| b0901 | ycaK | Isolate 2 | non-essential | conserved protein                                                     | 1.30  |
| b0902 | pflA | Isolate 1 | non-essential | pyruvate formate lyase activating enzyme 1                            | 0.45  |
| b0902 | pflA | Isolate 2 | non-essential | pyruvate formate lyase activating enzyme 1                            | 2.39  |
| b0903 | pflB | Isolate 1 | non-essential | pyruvate formate lyase I                                              | 2.00  |
| b0903 | pflB | Isolate 2 | non-essential | pyruvate formate lyase I                                              | 2.27  |
| b0904 | focA | Isolate 1 | non-essential | formate transporter                                                   | -0.44 |
| b0904 | focA | Isolate 2 | non-essential | formate transporter                                                   | -0.43 |
| b0905 | ycaO | Isolate 1 | non-essential | conserved protein                                                     | 0.91  |
| b0905 | ycaO | Isolate 2 | non-essential | conserved protein                                                     | 0.88  |
| b0906 | ycaP | Isolate 1 | non-essential | conserved inner membrane protein                                      | -1.46 |
| b0906 | ycaP | Isolate 2 | non-essential | conserved inner membrane protein                                      | -0.46 |
| b0907 | serC | Isolate 1 | non-essential | 3-phosphoserine/phosphohydroxythreonine aminotransferase              | 3.84  |
| b0907 | serC | Isolate 2 | non-essential | 3-phosphoserine/phosphohydroxythreonine aminotransferase              | -0.40 |
| b0908 | aroA | Isolate 1 | non-essential | 5-enolpyruvylshikimate-3-phosphate synthetase                         | -1.25 |
| b0908 | aroA | Isolate 2 | non-essential | 5-enolpyruvylshikimate-3-phosphate synthetase                         | -0.94 |
| b0909 | ycaL | Isolate 1 | non-essential | predicted peptidase with chaperone function                           | 1.13  |
| b0909 | ycaL | Isolate 2 | non-essential | predicted peptidase with chaperone function                           | 0.95  |
| b0910 | cmk  | Isolate 1 | non-essential | cytidylate kinase                                                     | 3.06  |
| b0910 | cmk  | Isolate 2 | non-essential | cytidylate kinase                                                     | -0.27 |
| b0912 | ihfB | Isolate 1 | non-essential | integration host factor (IHF), DNA-binding protein, beta subunit      | 1.76  |
| b0912 | ihfB | Isolate 2 | non-essential | integration host factor (IHF), DNA-binding protein, beta subunit      | 2.35  |
| b0913 | ycaI | Isolate 1 | non-essential | conserved inner membrane protein                                      | 0.15  |
| b0913 | ycaI | Isolate 2 | non-essential | conserved inner membrane protein                                      | -4.61 |
| b0916 | ycaQ | Isolate 1 | non-essential | conserved protein                                                     | 1.80  |
| b0916 | ycaQ | Isolate 2 | non-essential | conserved protein                                                     | -0.28 |
| b0917 | ycaR | Isolate 1 | non-essential | conserved protein                                                     | 1.53  |
| b0917 | ycaR | Isolate 2 | non-essential | conserved protein                                                     | -2.61 |
| b0918 | kdsB | Isolate 1 | essential     | 3-deoxy-manno-octulosonate cytidyltransferase                         | -1.40 |
| b0919 | ycbJ | Isolate 1 | non-essential | conserved protein                                                     | 0.72  |
| b0919 | ycbJ | Isolate 2 | non-essential | conserved protein                                                     | 0.38  |
| b0920 | ycbC | Isolate 1 | non-essential | conserved inner membrane protein                                      | 1.98  |
| b0920 | ycbC | Isolate 2 | non-essential | conserved inner membrane protein                                      | -0.01 |
| b0921 | smtA | Isolate 1 | non-essential | S-adenosylmethionine-dependent methyltransferase                      | 1.73  |
| b0921 | smtA | Isolate 2 | non-essential | S-adenosylmethionine-dependent methyltransferase                      | -0.72 |
| b0922 | mukF | Isolate 1 | essential     | Involved in chromosome partitioning, Ca <sup>2+</sup> binding protein | 12.47 |
| b0923 | mukE | Isolate 1 | essential     | protein involved in chromosome partitioning                           | 0.39  |
| b0924 | mukB | Isolate 1 | essential     | fused chromosome partitioning proteins                                | -4.26 |
| b0925 | ycbB | Isolate 1 | non-essential | predicted carboxypeptidase                                            | 0.31  |

|       |      |           |               |                                                                                          |       |
|-------|------|-----------|---------------|------------------------------------------------------------------------------------------|-------|
| b0925 | ycbB | Isolate 2 | non-essential | predicted carboxypeptidase                                                               | 1.00  |
| b0926 | ycbK | Isolate 1 | non-essential | conserved protein                                                                        | -0.34 |
| b0926 | ycbK | Isolate 2 | non-essential | conserved protein                                                                        | -1.49 |
| b0927 | ycbL | Isolate 1 | non-essential | predicted metal-binding enzyme                                                           | -0.13 |
| b0927 | ycbL | Isolate 2 | non-essential | predicted metal-binding enzyme                                                           | -0.16 |
| b0928 | aspC | Isolate 1 | non-essential | aspartate aminotransferase, PLP-dependent                                                | 0.75  |
| b0928 | aspC | Isolate 2 | non-essential | aspartate aminotransferase, PLP-dependent                                                | 1.81  |
| b0929 | ompF | Isolate 1 | non-essential | outer membrane porin 1a (Ia;b;F)                                                         | 0.84  |
| b0929 | ompF | Isolate 2 | non-essential | outer membrane porin 1a (Ia;b;F)                                                         | -1.08 |
| b0931 | pncB | Isolate 1 | non-essential | nicotinate phosphoribosyltransferase                                                     | 1.99  |
| b0931 | pncB | Isolate 2 | non-essential | nicotinate phosphoribosyltransferase                                                     | 2.40  |
| b0932 | pepN | Isolate 1 | non-essential | aminopeptidase N                                                                         | -0.01 |
| b0932 | pepN | Isolate 2 | non-essential | aminopeptidase N                                                                         | 0.71  |
| b0933 | ssuB | Isolate 1 | non-essential | alkanesulfonate transporter subunit -!- ATP-binding component of ABC superfamily         | -0.90 |
| b0933 | ssuB | Isolate 2 | non-essential | alkanesulfonate transporter subunit -!- ATP-binding component of ABC superfamily         | -1.53 |
| b0934 | ssuC | Isolate 1 | non-essential | alkanesulfonate transporter subunit -!- membrane component of ABC superfamily            | -0.68 |
| b0934 | ssuC | Isolate 2 | non-essential | alkanesulfonate transporter subunit -!- membrane component of ABC superfamily            | 0.69  |
| b0935 | ssuD | Isolate 1 | non-essential | alkanesulfonate monooxygenase, FMNH(2)-dependent                                         | 1.00  |
| b0935 | ssuD | Isolate 2 | non-essential | alkanesulfonate monooxygenase, FMNH(2)-dependent                                         | 1.86  |
| b0936 | ssuA | Isolate 1 | non-essential | alkanesulfonate transporter subunit -!- periplasmic-binding component of ABC superfamily | 0.10  |
| b0936 | ssuA | Isolate 2 | non-essential | alkanesulfonate transporter subunit -!- periplasmic-binding component of ABC superfamily | 1.31  |
| b0937 | ssuE | Isolate 1 | non-essential | NAD(P)H-dependent FMN reductase                                                          | -0.21 |
| b0937 | ssuE | Isolate 2 | non-essential | NAD(P)H-dependent FMN reductase                                                          | 2.26  |
| b0938 | ycbQ | Isolate 1 | non-essential | predicted fimbrial-like adhesin protein                                                  | 0.88  |
| b0938 | ycbQ | Isolate 2 | non-essential | predicted fimbrial-like adhesin protein                                                  | 0.25  |
| b0939 | ycbR | Isolate 1 | non-essential | predicted periplasmic pilin chaperone                                                    | -1.14 |
| b0939 | ycbR | Isolate 2 | non-essential | predicted periplasmic pilin chaperone                                                    | 0.23  |
| b0940 | ycbS | Isolate 1 | non-essential | predicted outer membrane usher protein                                                   | 1.87  |
| b0940 | ycbS | Isolate 2 | non-essential | predicted outer membrane usher protein                                                   | 2.59  |
| b0941 | ycbT | Isolate 1 | non-essential | predicted fimbrial-like adhesin protein                                                  | -1.25 |
| b0941 | ycbT | Isolate 2 | non-essential | predicted fimbrial-like adhesin protein                                                  | -0.10 |
| b0942 | ycbU | Isolate 1 | non-essential | predicted fimbrial-like adhesin protein                                                  | 1.19  |
| b0942 | ycbU | Isolate 2 | non-essential | predicted fimbrial-like adhesin protein                                                  | -0.10 |
| b0943 | ycbV | Isolate 1 | non-essential | predicted fimbrial-like adhesin protein                                                  | -2.15 |
| b0943 | ycbV | Isolate 2 | non-essential | predicted fimbrial-like adhesin protein                                                  | -2.18 |
| b0944 | ycbF | Isolate 1 | non-essential | predicted periplasmic pilini chaperone                                                   | 1.22  |
| b0944 | ycbF | Isolate 2 | non-essential | predicted periplasmic pilini chaperone                                                   | 0.28  |
| b0945 | pyrD | Isolate 1 | non-essential | dihydro-orotate oxidase, FMN-linked                                                      | -3.24 |
| b0945 | pyrD | Isolate 2 | non-essential | dihydro-orotate oxidase, FMN-linked                                                      | -0.48 |
| b0946 | ycbW | Isolate 1 | non-essential | predicted protein                                                                        | 0.36  |
| b0946 | ycbW | Isolate 2 | non-essential | predicted protein                                                                        | 1.05  |
| b0947 | ycbX | Isolate 1 | non-essential | predicted 2Fe-2S cluster-containing protein                                              | -1.78 |
| b0947 | ycbX | Isolate 2 | non-essential | predicted 2Fe-2S cluster-containing protein                                              | -1.53 |

|       |      |           |               |                                                                                    |       |
|-------|------|-----------|---------------|------------------------------------------------------------------------------------|-------|
| b0948 | ycbY | Isolate 1 | non-essential | predicted methyltransferase                                                        | -0.45 |
| b0948 | ycbY | Isolate 2 | non-essential | predicted methyltransferase                                                        | 1.53  |
| b0949 | uup  | Isolate 1 | non-essential | fused predicted transporter subunits -!- ATP-binding components of ABC superfamily | 1.48  |
| b0949 | uup  | Isolate 2 | non-essential | fused predicted transporter subunits -!- ATP-binding components of ABC superfamily | -0.37 |
| b0950 | pqiA | Isolate 1 | non-essential | paraquat-inducible membrane protein A                                              | 0.47  |
| b0950 | pqiA | Isolate 2 | non-essential | paraquat-inducible membrane protein A                                              | 1.82  |
| b0951 | pqiB | Isolate 1 | non-essential | paraquat-inducible protein B                                                       | 1.56  |
| b0951 | pqiB | Isolate 2 | non-essential | paraquat-inducible protein B                                                       | 2.16  |
| b0952 | ymbA | Isolate 1 | non-essential | conserved protein                                                                  | 0.44  |
| b0952 | ymbA | Isolate 2 | non-essential | conserved protein                                                                  | 1.83  |
| b0953 | rmf  | Isolate 1 | non-essential | ribosome modulation factor                                                         | 1.20  |
| b0953 | rmf  | Isolate 2 | non-essential | ribosome modulation factor                                                         | 1.10  |
| b0954 | fabA | Isolate 1 | essential     | beta-hydroxydecanoyl thioester dehydrase                                           | -3.42 |
| b0955 | ycbZ | Isolate 1 | non-essential | predicted peptidase                                                                | -0.14 |
| b0955 | ycbZ | Isolate 2 | non-essential | predicted peptidase                                                                | 0.44  |
| b0956 | ycbG | Isolate 1 | non-essential | conserved protein                                                                  | 3.06  |
| b0956 | ycbG | Isolate 2 | non-essential | conserved protein                                                                  | -0.29 |
| b0957 | ompA | Isolate 1 | non-essential | outer membrane protein A (3a;II*;G;d)                                              | 0.41  |
| b0957 | ompA | Isolate 2 | non-essential | outer membrane protein A (3a;II*;G;d)                                              | -0.51 |
| b0958 | sulA | Isolate 1 | non-essential | SOS cell division inhibitor                                                        | 2.25  |
| b0958 | sulA | Isolate 2 | non-essential | SOS cell division inhibitor                                                        | 0.00  |
| b0959 | yccR | Isolate 1 | non-essential | conserved protein                                                                  | -2.74 |
| b0959 | yccR | Isolate 2 | non-essential | conserved protein                                                                  | -1.24 |
| b0960 | yccS | Isolate 1 | non-essential | predicted inner membrane protein                                                   | 0.95  |
| b0960 | yccS | Isolate 2 | non-essential | predicted inner membrane protein                                                   | 1.76  |
| b0961 | yccF | Isolate 1 | non-essential | conserved inner membrane protein                                                   | -2.06 |
| b0961 | yccF | Isolate 2 | non-essential | conserved inner membrane protein                                                   | -3.53 |
| b0962 | helD | Isolate 1 | non-essential | DNA helicase IV                                                                    | 2.45  |
| b0962 | helD | Isolate 2 | non-essential | DNA helicase IV                                                                    | 2.23  |
| b0963 | mgsA | Isolate 1 | non-essential | methylglyoxal synthase                                                             | -0.31 |
| b0963 | mgsA | Isolate 2 | non-essential | methylglyoxal synthase                                                             | 0.36  |
| b0964 | yccT | Isolate 1 | non-essential | conserved protein                                                                  | -0.50 |
| b0964 | yccT | Isolate 2 | non-essential | conserved protein                                                                  | -2.51 |
| b0965 | yccU | Isolate 1 | non-essential | predicted CoA-binding protein with NAD(P)-binding Rossmann-fold domain             | 2.10  |
| b0965 | yccU | Isolate 2 | non-essential | predicted CoA-binding protein with NAD(P)-binding Rossmann-fold domain             | -0.02 |
| b0966 | yccV | Isolate 1 | non-essential | DNA-binding protein, hemimethylated                                                | 0.58  |
| b0966 | yccV | Isolate 2 | non-essential | DNA-binding protein, hemimethylated                                                | 0.96  |
| b0967 | yccW | Isolate 1 | non-essential | predicted methyltransferase                                                        | -0.56 |
| b0967 | yccW | Isolate 2 | non-essential | predicted methyltransferase                                                        | 1.85  |
| b0968 | yccX | Isolate 1 | non-essential | predicted acylphosphatase                                                          | 0.70  |
| b0968 | yccX | Isolate 2 | non-essential | predicted acylphosphatase                                                          | 0.94  |
| b0969 | yccK | Isolate 1 | non-essential | predicted sulfite reductase subunit                                                | -0.20 |
| b0969 | yccK | Isolate 2 | non-essential | predicted sulfite reductase subunit                                                | 0.74  |



|         |      |           |               |                                                                      |        |
|---------|------|-----------|---------------|----------------------------------------------------------------------|--------|
| b0970   | yccA | Isolate 1 | non-essential | inner membrane protein                                               | 0.53   |
| b0970   | yccA | Isolate 2 | non-essential | inner membrane protein                                               | 0.12   |
| b0972   | hyaA | Isolate 1 | non-essential | hydrogenase 1, small subunit                                         | -0.97  |
| b0972   | hyaA | Isolate 2 | non-essential | hydrogenase 1, small subunit                                         | 0.03   |
| b0973   | hyaB | Isolate 1 | non-essential | hydrogenase 1, large subunit                                         | -0.81  |
| b0973   | hyaB | Isolate 2 | non-essential | hydrogenase 1, large subunit                                         | 1.71   |
| b0974   | hyaC | Isolate 1 | non-essential | hydrogenase 1, b-type cytochrome subunit                             | -0.23  |
| b0974   | hyaC | Isolate 2 | non-essential | hydrogenase 1, b-type cytochrome subunit                             | -1.41  |
| b0975   | hyaD | Isolate 1 | non-essential | protein involved in processing of HyaA and HyaB proteins             | -1.28  |
| b0975   | hyaD | Isolate 2 | non-essential | protein involved in processing of HyaA and HyaB proteins             | -13.06 |
| b0976   | hyaE | Isolate 1 | non-essential | protein involved in processing of HyaA and HyaB proteins             | -0.42  |
| b0976   | hyaE | Isolate 2 | non-essential | protein involved in processing of HyaA and HyaB proteins             | -0.17  |
| b0977   | hyaF | Isolate 1 | non-essential | protein involved in nickel incorporation into hydrogenase-1 proteins | -1.79  |
| b0977   | hyaF | Isolate 2 | non-essential | protein involved in nickel incorporation into hydrogenase-1 proteins | -0.04  |
| b0978   | appC | Isolate 1 | non-essential | cytochrome bd-II oxidase, subunit I                                  | -1.11  |
| b0978   | appC | Isolate 2 | non-essential | cytochrome bd-II oxidase, subunit I                                  | 0.71   |
| b0979   | appB | Isolate 1 | non-essential | cytochrome bd-II oxidase, subunit II                                 | 0.82   |
| b0979   | appB | Isolate 2 | non-essential | cytochrome bd-II oxidase, subunit II                                 | -0.22  |
| b0979.1 | *    | Isolate 1 | *             | *                                                                    | 0.55   |
| b0979.1 | *    | Isolate 2 | *             | *                                                                    | 0.21   |
| b0980   | appA | Isolate 1 | non-essential | phosphoanhydride phosphorylase                                       | -0.18  |
| b0980   | appA | Isolate 2 | non-essential | phosphoanhydride phosphorylase                                       | 0.13   |
| b0981   | yccC | Isolate 1 | non-essential | cryptic autophosphorylating protein tyrosine kinase Etk              | 1.81   |
| b0981   | yccC | Isolate 2 | non-essential | cryptic autophosphorylating protein tyrosine kinase Etk              | 0.13   |
| b0982   | etp  | Isolate 1 | non-essential | phosphotyrosine-protein phosphatase                                  | -0.71  |
| b0982   | etp  | Isolate 2 | non-essential | phosphotyrosine-protein phosphatase                                  | -0.22  |
| b0983   | yccZ | Isolate 1 | non-essential | predicted exopolysaccharide export protein                           | 0.95   |
| b0983   | yccZ | Isolate 2 | non-essential | predicted exopolysaccharide export protein                           | -0.44  |
| b0984   | ymcA | Isolate 1 | non-essential | conserved protein                                                    | 0.96   |
| b0984   | ymcA | Isolate 2 | non-essential | conserved protein                                                    | 0.16   |
| b0985   | ymcB | Isolate 1 | non-essential | conserved protein                                                    | -0.57  |
| b0985   | ymcB | Isolate 2 | non-essential | conserved protein                                                    | 0.82   |
| b0986   | ymcC | Isolate 1 | non-essential | predicted outer membrane lipoprotein                                 | -0.78  |
| b0986   | ymcC | Isolate 2 | non-essential | predicted outer membrane lipoprotein                                 | -0.22  |
| b0987   | ymcD | Isolate 1 | non-essential | predicted protein                                                    | 0.84   |
| b0987   | ymcD | Isolate 2 | non-essential | predicted protein                                                    | 0.05   |
| b0989   | cspH | Isolate 1 | non-essential | stress protein, member of the CspA-family                            | -0.06  |
| b0989   | cspH | Isolate 2 | non-essential | stress protein, member of the CspA-family                            | -0.33  |
| b0990   | cspG | Isolate 1 | non-essential | DNA-binding transcriptional regulator                                | -0.09  |
| b0990   | cspG | Isolate 2 | non-essential | DNA-binding transcriptional regulator                                | -0.09  |
| b0991   | ymcE | Isolate 1 | non-essential | cold shock gene                                                      | 0.70   |
| b0991   | ymcE | Isolate 2 | non-essential | cold shock gene                                                      | 0.65   |
| b0992   | yccM | Isolate 1 | non-essential | predicted 4Fe-4S membrane protein                                    | 0.54   |

|       |      |           |               |                                                                                                                 |       |
|-------|------|-----------|---------------|-----------------------------------------------------------------------------------------------------------------|-------|
| b0992 | yccM | Isolate 2 | non-essential | predicted 4Fe-4S membrane protein                                                                               | 0.61  |
| b0993 | torS | Isolate 1 | non-essential | hybrid sensory histidine kinase in two-component regulatory system with TorR                                    | 0.25  |
| b0993 | torS | Isolate 2 | non-essential | hybrid sensory histidine kinase in two-component regulatory system with TorR                                    | 0.84  |
| b0994 | torT | Isolate 1 | non-essential | periplasmic sensory protein associated with the TorRS two-component regulatory system                           | 3.32  |
| b0994 | torT | Isolate 2 | non-essential | periplasmic sensory protein associated with the TorRS two-component regulatory system                           | -0.16 |
| b0995 | torR | Isolate 1 | non-essential | DNA-binding response regulator in two-component regulatory system with TorS                                     | 1.82  |
| b0995 | torR | Isolate 2 | non-essential | DNA-binding response regulator in two-component regulatory system with TorS                                     | 0.23  |
| b0996 | torC | Isolate 1 | non-essential | trimethylamine N-oxide (TMAO) reductase I, cytochrome c-type subunit                                            | 0.78  |
| b0996 | torC | Isolate 2 | non-essential | trimethylamine N-oxide (TMAO) reductase I, cytochrome c-type subunit                                            | 0.69  |
| b0997 | torA | Isolate 1 | non-essential | trimethylamine N-oxide (TMAO) reductase I, catalytic subunit                                                    | -0.28 |
| b0997 | torA | Isolate 2 | non-essential | trimethylamine N-oxide (TMAO) reductase I, catalytic subunit                                                    | -0.72 |
| b0998 | torD | Isolate 1 | non-essential | chaperone involved in maturation of TorA subunit of trimethylamine N-oxide reductase system I                   | 2.39  |
| b0998 | torD | Isolate 2 | non-essential | chaperone involved in maturation of TorA subunit of trimethylamine N-oxide reductase system I                   | 2.17  |
| b0999 | cbpM | Isolate 1 | non-essential | modulator of CbpA co-chaperone                                                                                  | 1.33  |
| b0999 | cbpM | Isolate 2 | non-essential | modulator of CbpA co-chaperone                                                                                  | -0.37 |
| b1000 | cbpA | Isolate 1 | non-essential | curved DNA-binding protein, DnaJ homologue that functions as a co-chaperone of DnaK                             | 0.49  |
| b1000 | cbpA | Isolate 2 | non-essential | curved DNA-binding protein, DnaJ homologue that functions as a co-chaperone of DnaK                             | -1.12 |
| b1001 | yccE | Isolate 1 | non-essential | predicted protein                                                                                               | -0.40 |
| b1001 | yccE | Isolate 2 | non-essential | predicted protein                                                                                               | 0.96  |
| b1002 | agp  | Isolate 1 | non-essential | glucose-1-phosphatase/inositol phosphatase                                                                      | 2.38  |
| b1002 | agp  | Isolate 2 | non-essential | glucose-1-phosphatase/inositol phosphatase                                                                      | 2.61  |
| b1003 | yccJ | Isolate 1 | non-essential | predicted protein                                                                                               | 1.46  |
| b1003 | yccJ | Isolate 2 | non-essential | predicted protein                                                                                               | 0.21  |
| b1004 | wrbA | Isolate 1 | non-essential | predicted flavoprotein in Trp regulation                                                                        | -0.07 |
| b1004 | wrbA | Isolate 2 | non-essential | predicted flavoprotein in Trp regulation                                                                        | 0.98  |
| b1006 | ycdG | Isolate 1 | non-essential | predicted transporter                                                                                           | -0.69 |
| b1006 | ycdG | Isolate 2 | non-essential | predicted transporter                                                                                           | -0.65 |
| b1007 | ycdH | Isolate 1 | non-essential | predicted oxidoreductase, flavin:NADH component                                                                 | 0.31  |
| b1007 | ycdH | Isolate 2 | non-essential | predicted oxidoreductase, flavin:NADH component                                                                 | -0.12 |
| b1008 | ycdI | Isolate 1 | non-essential | predicted oxidoreductase                                                                                        | 1.44  |
| b1008 | ycdI | Isolate 2 | non-essential | predicted oxidoreductase                                                                                        | -0.77 |
| b1009 | rarA | Isolate 1 | non-essential | predicted hydrolase                                                                                             | 0.19  |
| b1009 | rarA | Isolate 2 | non-essential | predicted hydrolase                                                                                             | -0.14 |
| b1010 | ycdK | Isolate 1 | non-essential | conserved protein                                                                                               | 0.99  |
| b1010 | ycdK | Isolate 2 | non-essential | conserved protein                                                                                               | -0.81 |
| b1011 | ycdL | Isolate 1 | non-essential | predicted enzyme                                                                                                | 0.19  |
| b1011 | ycdL | Isolate 2 | non-essential | predicted enzyme                                                                                                | -0.48 |
| b1012 | ycdM | Isolate 1 | non-essential | predicted monooxygenase                                                                                         | -0.29 |
| b1012 | ycdM | Isolate 2 | non-essential | predicted monooxygenase                                                                                         | 0.21  |
| b1013 | ycdC | Isolate 1 | non-essential | predicted DNA-binding transcriptional regulator                                                                 | -0.33 |
| b1013 | ycdC | Isolate 2 | non-essential | predicted DNA-binding transcriptional regulator                                                                 | 0.91  |
| b1014 | putA | Isolate 1 | non-essential | fused DNA-binding transcriptional regulator -!- proline dehydrogenase -!- pyrroline-5-carboxylate dehydrogenase | 0.13  |
| b1014 | putA | Isolate 2 | non-essential | fused DNA-binding transcriptional regulator -!- proline dehydrogenase -!- pyrroline-5-carboxylate dehydrogenase | 0.10  |

|       |      |           |               |                                                                          |       |
|-------|------|-----------|---------------|--------------------------------------------------------------------------|-------|
| b1015 | putP | Isolate 1 | non-essential | proline:sodium symporter                                                 | 0.63  |
| b1015 | putP | Isolate 2 | non-essential | proline:sodium symporter                                                 | -0.16 |
| b1016 | ycdN | Isolate 1 | *             | predicted protein, N-ter fragment (pseudogene)                           | -2.19 |
| b1016 | ycdN | Isolate 2 | *             | predicted protein, N-ter fragment (pseudogene)                           | 0.74  |
| b1018 | ycdO | Isolate 1 | non-essential | conserved protein                                                        | -0.06 |
| b1018 | ycdO | Isolate 2 | non-essential | conserved protein                                                        | 1.56  |
| b1019 | ycdB | Isolate 1 | non-essential | conserved protein                                                        | -1.86 |
| b1019 | ycdB | Isolate 2 | non-essential | conserved protein                                                        | 0.62  |
| b1020 | phoH | Isolate 1 | non-essential | conserved protein with nucleoside triphosphate hydrolase domain          | 0.00  |
| b1020 | phoH | Isolate 2 | non-essential | conserved protein with nucleoside triphosphate hydrolase domain          | 0.63  |
| b1021 | ycdP | Isolate 1 | non-essential | predicted inner membrane protein                                         | -0.76 |
| b1021 | ycdP | Isolate 2 | non-essential | predicted inner membrane protein                                         | 0.39  |
| b1022 | ycdQ | Isolate 1 | non-essential | predicted glycosyl transferase                                           | 2.83  |
| b1022 | ycdQ | Isolate 2 | non-essential | predicted glycosyl transferase                                           | 0.47  |
| b1023 | ycdR | Isolate 1 | non-essential | predicted enzyme associated with biofilm formation                       | -0.01 |
| b1023 | ycdR | Isolate 2 | non-essential | predicted enzyme associated with biofilm formation                       | -0.19 |
| b1024 | ycdS | Isolate 1 | non-essential | predicted outer membrane protein                                         | -1.50 |
| b1024 | ycdS | Isolate 2 | non-essential | predicted outer membrane protein                                         | -0.49 |
| b1025 | ycdT | Isolate 1 | non-essential | predicted diguanylate cyclase                                            | 0.20  |
| b1025 | ycdT | Isolate 2 | non-essential | predicted diguanylate cyclase                                            | 0.91  |
| b1028 | ymdE | Isolate 1 | *             | predicted protein (pseudogene)                                           | 0.95  |
| b1028 | ymdE | Isolate 2 | *             | predicted protein (pseudogene)                                           | 2.23  |
| b1029 | ycdU | Isolate 1 | non-essential | predicted inner membrane protein                                         | 0.19  |
| b1029 | ycdU | Isolate 2 | non-essential | predicted inner membrane protein                                         | 0.36  |
| b1033 | ycdW | Isolate 1 | non-essential | 2-ketoacid reductase                                                     | 0.47  |
| b1033 | ycdW | Isolate 2 | non-essential | 2-ketoacid reductase                                                     | -3.17 |
| b1034 | ycdX | Isolate 1 | non-essential | predicted zinc-binding hydrolase                                         | -0.67 |
| b1034 | ycdX | Isolate 2 | non-essential | predicted zinc-binding hydrolase                                         | 0.51  |
| b1035 | ycdY | Isolate 1 | non-essential | conserved protein                                                        | 0.90  |
| b1035 | ycdY | Isolate 2 | non-essential | conserved protein                                                        | 0.57  |
| b1036 | ycdZ | Isolate 1 | non-essential | predicted inner membrane protein                                         | 0.20  |
| b1036 | ycdZ | Isolate 2 | non-essential | predicted inner membrane protein                                         | -0.06 |
| b1037 | csgG | Isolate 1 | non-essential | outer membrane lipoprotein                                               | 0.08  |
| b1037 | csgG | Isolate 2 | non-essential | outer membrane lipoprotein                                               | -0.34 |
| b1038 | csgF | Isolate 1 | non-essential | predicted transport protein                                              | -0.98 |
| b1038 | csgF | Isolate 2 | non-essential | predicted transport protein                                              | 0.26  |
| b1039 | csgE | Isolate 1 | non-essential | predicted transport protein                                              | 1.23  |
| b1039 | csgE | Isolate 2 | non-essential | predicted transport protein                                              | 2.42  |
| b1040 | csgD | Isolate 1 | non-essential | DNA-binding transcriptional activator in two-component regulatory system | 1.57  |
| b1040 | csgD | Isolate 2 | non-essential | DNA-binding transcriptional activator in two-component regulatory system | 0.84  |
| b1041 | csgB | Isolate 1 | non-essential | curlin nucleator protein, minor subunit in curli complex                 | 0.25  |
| b1041 | csgB | Isolate 2 | non-essential | curlin nucleator protein, minor subunit in curli complex                 | 2.39  |
| b1042 | csgA | Isolate 1 | non-essential | cryptic curlin major subunit                                             | 0.72  |

|       |      |           |               |                                                                  |       |
|-------|------|-----------|---------------|------------------------------------------------------------------|-------|
| b1042 | csgA | Isolate 2 | non-essential | cryptic curlin major subunit                                     | 0.47  |
| b1045 | ymdB | Isolate 1 | non-essential | conserved protein                                                | 1.25  |
| b1045 | ymdB | Isolate 2 | non-essential | conserved protein                                                | -0.85 |
| b1046 | ymdC | Isolate 1 | non-essential | predicted hydrolase                                              | 2.54  |
| b1046 | ymdC | Isolate 2 | non-essential | predicted hydrolase                                              | 3.02  |
| b1047 | mdoC | Isolate 1 | non-essential | membrane protein required for modification of periplasmic glucan | 3.56  |
| b1047 | mdoC | Isolate 2 | non-essential | membrane protein required for modification of periplasmic glucan | 1.67  |
| b1048 | mdoG | Isolate 1 | non-essential | glucan biosynthesis protein, periplasmic                         | -0.86 |
| b1048 | mdoG | Isolate 2 | non-essential | glucan biosynthesis protein, periplasmic                         | 2.11  |
| b1049 | mdoH | Isolate 1 | non-essential | glucan biosynthesis: glycosyl transferase                        | -1.06 |
| b1049 | mdoH | Isolate 2 | non-essential | glucan biosynthesis: glycosyl transferase                        | 4.01  |
| b1050 | yceK | Isolate 1 | non-essential | predicted lipoprotein                                            | 0.64  |
| b1050 | yceK | Isolate 2 | non-essential | predicted lipoprotein                                            | -0.79 |
| b1051 | msyB | Isolate 1 | non-essential | predicted protein                                                | 1.79  |
| b1051 | msyB | Isolate 2 | non-essential | predicted protein                                                | 1.46  |
| b1053 | mdtG | Isolate 1 | non-essential | predicted drug efflux system                                     | 2.08  |
| b1053 | mdtG | Isolate 2 | non-essential | predicted drug efflux system                                     | 2.24  |
| b1054 | lpxL | Isolate 1 | non-essential | lauryl-acyl carrier protein (ACP)-dependent acyltransferase      | -0.70 |
| b1054 | lpxL | Isolate 2 | non-essential | lauryl-acyl carrier protein (ACP)-dependent acyltransferase      | -0.58 |
| b1055 | yceA | Isolate 1 | non-essential | conserved protein                                                | 0.26  |
| b1055 | yceA | Isolate 2 | non-essential | conserved protein                                                | 1.49  |
| b1056 | yceI | Isolate 1 | non-essential | predicted protein                                                | -0.60 |
| b1056 | yceI | Isolate 2 | non-essential | predicted protein                                                | -0.49 |
| b1057 | yceJ | Isolate 1 | non-essential | predicted cytochrome b561                                        | -0.10 |
| b1057 | yceJ | Isolate 2 | non-essential | predicted cytochrome b561                                        | 0.07  |
| b1058 | yceO | Isolate 1 | non-essential | predicted protein                                                | -0.02 |
| b1058 | yceO | Isolate 2 | non-essential | predicted protein                                                | -0.16 |
| b1059 | solA | Isolate 1 | non-essential | N-methyltryptophan oxidase, FAD-binding                          | -0.05 |
| b1059 | solA | Isolate 2 | non-essential | N-methyltryptophan oxidase, FAD-binding                          | 1.04  |
| b1060 | yceP | Isolate 1 | non-essential | predicted protein                                                | 1.15  |
| b1060 | yceP | Isolate 2 | non-essential | predicted protein                                                | 1.55  |
| b1061 | dinI | Isolate 1 | non-essential | DNA damage-inducible protein I                                   | 0.45  |
| b1061 | dinI | Isolate 2 | non-essential | DNA damage-inducible protein I                                   | -0.34 |
| b1062 | pyrC | Isolate 1 | non-essential | dihydro-orotase                                                  | 0.23  |
| b1062 | pyrC | Isolate 2 | non-essential | dihydro-orotase                                                  | -2.95 |
| b1063 | yceB | Isolate 1 | non-essential | predicted lipoprotein                                            | 0.60  |
| b1063 | yceB | Isolate 2 | non-essential | predicted lipoprotein                                            | 1.30  |
| b1064 | grxB | Isolate 1 | non-essential | glutaredoxin 2 (Grx2)                                            | 1.27  |
| b1064 | grxB | Isolate 2 | non-essential | glutaredoxin 2 (Grx2)                                            | 0.51  |
| b1065 | mdtH | Isolate 1 | non-essential | predicted drug efflux system                                     | -2.57 |
| b1065 | mdtH | Isolate 2 | non-essential | predicted drug efflux system                                     | -0.81 |
| b1066 | rimJ | Isolate 1 | non-essential | ribosomal-protein-S5-alanine N-acetyltransferase                 | -0.15 |
| b1066 | rimJ | Isolate 2 | non-essential | ribosomal-protein-S5-alanine N-acetyltransferase                 | 3.18  |

|       |      |           |               |                                                                                |        |
|-------|------|-----------|---------------|--------------------------------------------------------------------------------|--------|
| b1067 | yceH | Isolate 1 | non-essential | conserved protein                                                              | 1.52   |
| b1067 | yceH | Isolate 2 | non-essential | conserved protein                                                              | 1.25   |
| b1068 | mviM | Isolate 1 | non-essential | predicted oxidoreductase, NAD(P)-binding Rossmann-fold domain                  | -0.59  |
| b1068 | mviM | Isolate 2 | non-essential | predicted oxidoreductase, NAD(P)-binding Rossmann-fold domain                  | 1.74   |
| b1070 | flgN | Isolate 1 | non-essential | export chaperone for FlgK and FlgL                                             | 1.25   |
| b1070 | flgN | Isolate 2 | non-essential | export chaperone for FlgK and FlgL                                             | 1.74   |
| b1071 | flgM | Isolate 1 | non-essential | anti-sigma factor for FliA (sigma 28)                                          | 0.44   |
| b1071 | flgM | Isolate 2 | non-essential | anti-sigma factor for FliA (sigma 28)                                          | 0.54   |
| b1072 | flgA | Isolate 1 | non-essential | assembly protein for flagellar basal-body periplasmic P ring                   | 0.67   |
| b1072 | flgA | Isolate 2 | non-essential | assembly protein for flagellar basal-body periplasmic P ring                   | 1.20   |
| b1073 | flgB | Isolate 1 | non-essential | flagellar component of cell-proximal portion of basal-body rod                 | 0.08   |
| b1073 | flgB | Isolate 2 | non-essential | flagellar component of cell-proximal portion of basal-body rod                 | -0.55  |
| b1074 | flgC | Isolate 1 | non-essential | flagellar component of cell-proximal portion of basal-body rod                 | -0.40  |
| b1074 | flgC | Isolate 2 | non-essential | flagellar component of cell-proximal portion of basal-body rod                 | 0.40   |
| b1075 | flgD | Isolate 1 | non-essential | flagellar hook assembly protein                                                | 0.28   |
| b1075 | flgD | Isolate 2 | non-essential | flagellar hook assembly protein                                                | -0.07  |
| b1076 | flgE | Isolate 1 | non-essential | flagellar hook protein                                                         | 1.20   |
| b1076 | flgE | Isolate 2 | non-essential | flagellar hook protein                                                         | 1.59   |
| b1077 | flgF | Isolate 1 | non-essential | flagellar component of cell-proximal portion of basal-body rod                 | 1.70   |
| b1077 | flgF | Isolate 2 | non-essential | flagellar component of cell-proximal portion of basal-body rod                 | 1.93   |
| b1078 | flgG | Isolate 1 | non-essential | flagellar component of cell-distal portion of basal-body rod                   | 0.88   |
| b1078 | flgG | Isolate 2 | non-essential | flagellar component of cell-distal portion of basal-body rod                   | 0.20   |
| b1079 | flgH | Isolate 1 | non-essential | flagellar protein of basal-body outer-membrane L ring                          | -2.81  |
| b1079 | flgH | Isolate 2 | non-essential | flagellar protein of basal-body outer-membrane L ring                          | -0.41  |
| b1080 | flgI | Isolate 1 | non-essential | predicted flagellar basal body protein                                         | 0.26   |
| b1080 | flgI | Isolate 2 | non-essential | predicted flagellar basal body protein                                         | 0.47   |
| b1081 | flgJ | Isolate 1 | non-essential | muramidase                                                                     | -0.65  |
| b1081 | flgJ | Isolate 2 | non-essential | muramidase                                                                     | 0.89   |
| b1082 | flgK | Isolate 1 | non-essential | flagellar hook-filament junction protein 1                                     | -0.93  |
| b1082 | flgK | Isolate 2 | non-essential | flagellar hook-filament junction protein 1                                     | 0.15   |
| b1083 | flgL | Isolate 1 | non-essential | flagellar hook-filament junction protein                                       | -0.13  |
| b1083 | flgL | Isolate 2 | non-essential | flagellar hook-filament junction protein                                       | -1.68  |
| b1084 | rne  | Isolate 1 | essential     | fused ribonucleaseE endoribonuclease -!- scaffold for formation of degradosome | 0.38   |
| b1086 | rluC | Isolate 1 | non-essential | 23S rRNA pseudouridylate synthase                                              | -0.93  |
| b1086 | rluC | Isolate 2 | non-essential | 23S rRNA pseudouridylate synthase                                              | 3.03   |
| b1087 | yceF | Isolate 1 | non-essential | predicted protein                                                              | -0.10  |
| b1087 | yceF | Isolate 2 | non-essential | predicted protein                                                              | -0.31  |
| b1088 | yceD | Isolate 1 | non-essential | conserved protein                                                              | -13.33 |
| b1088 | yceD | Isolate 2 | non-essential | conserved protein                                                              | 0.18   |
| b1089 | rpmF | Isolate 1 | non-essential | 50S ribosomal subunit protein L32                                              | -1.10  |
| b1089 | rpmF | Isolate 2 | non-essential | 50S ribosomal subunit protein L32                                              | 1.72   |
| b1090 | plsX | Isolate 1 | non-essential | fatty acid/phospholipid synthesis protein                                      | -0.46  |
| b1090 | plsX | Isolate 2 | non-essential | fatty acid/phospholipid synthesis protein                                      | -1.10  |

|       |      |           |               |                                                                                              |       |
|-------|------|-----------|---------------|----------------------------------------------------------------------------------------------|-------|
| b1091 | fabH | Isolate 1 | non-essential | 3-oxoacyl-[acyl-carrier-protein] synthase III                                                | -2.61 |
| b1091 | fabH | Isolate 2 | non-essential | 3-oxoacyl-[acyl-carrier-protein] synthase III                                                | 1.71  |
| b1092 | fabD | Isolate 1 | essential     | malonyl-CoA-[acyl-carrier-protein] transacylase                                              | 0.89  |
| b1094 | acpP | Isolate 1 | essential     | acyl carrier protein (ACP)                                                                   | -3.40 |
| b1095 | fabF | Isolate 1 | non-essential | 3-oxoacyl-[acyl-carrier-protein] synthase II                                                 | -1.07 |
| b1095 | fabF | Isolate 2 | non-essential | 3-oxoacyl-[acyl-carrier-protein] synthase II                                                 | -1.18 |
| b1096 | pabC | Isolate 1 | non-essential | 4-amino-4-deoxychorismate lyase component of para-aminobenzoate synthase multienzyme complex | 0.25  |
| b1096 | pabC | Isolate 2 | non-essential | 4-amino-4-deoxychorismate lyase component of para-aminobenzoate synthase multienzyme complex | 0.93  |
| b1097 | yceG | Isolate 1 | non-essential | predicted aminodeoxychorismate lyase                                                         | 1.49  |
| b1097 | yceG | Isolate 2 | non-essential | predicted aminodeoxychorismate lyase                                                         | -0.12 |
| b1098 | tmk  | Isolate 1 | essential     | thymidylate kinase                                                                           | 2.56  |
| b1099 | holB | Isolate 1 | essential     | DNA polymerase III, delta prime subunit                                                      | -1.76 |
| b1100 | ycfH | Isolate 1 | non-essential | predicted metallodependent hydrolase                                                         | -0.74 |
| b1100 | ycfH | Isolate 2 | non-essential | predicted metallodependent hydrolase                                                         | 1.56  |
| b1101 | ptsG | Isolate 1 | non-essential | fused glucose-specific PTS enzyme IIBC components                                            | 1.41  |
| b1101 | ptsG | Isolate 2 | non-essential | fused glucose-specific PTS enzyme IIBC components                                            | -0.14 |
| b1102 | fhuE | Isolate 1 | non-essential | ferric-rhodotorulic acid outer membrane transporter                                          | 0.60  |
| b1102 | fhuE | Isolate 2 | non-essential | ferric-rhodotorulic acid outer membrane transporter                                          | 0.70  |
| b1103 | hinT | Isolate 1 | non-essential | purine nucleoside phosphoramidase                                                            | -0.70 |
| b1103 | hinT | Isolate 2 | non-essential | purine nucleoside phosphoramidase                                                            | -0.30 |
| b1104 | ycfL | Isolate 1 | non-essential | predicted protein                                                                            | 0.27  |
| b1104 | ycfL | Isolate 2 | non-essential | predicted protein                                                                            | 5.39  |
| b1105 | ycfM | Isolate 1 | non-essential | predicted outer membrane lipoprotein                                                         | -0.36 |
| b1105 | ycfM | Isolate 2 | non-essential | predicted outer membrane lipoprotein                                                         | -0.21 |
| b1106 | ycfN | Isolate 1 | non-essential | thiamin kinase                                                                               | 0.39  |
| b1106 | ycfN | Isolate 2 | non-essential | thiamin kinase                                                                               | -1.32 |
| b1107 | nagZ | Isolate 1 | non-essential | beta N-acetyl-glucosaminidase                                                                | 0.41  |
| b1107 | nagZ | Isolate 2 | non-essential | beta N-acetyl-glucosaminidase                                                                | 0.77  |
| b1108 | ycfP | Isolate 1 | non-essential | conserved protein                                                                            | -0.80 |
| b1108 | ycfP | Isolate 2 | non-essential | conserved protein                                                                            | -0.66 |
| b1109 | ndh  | Isolate 1 | non-essential | respiratory NADH dehydrogenase 2/cupric reductase                                            | 1.00  |
| b1109 | ndh  | Isolate 2 | non-essential | respiratory NADH dehydrogenase 2/cupric reductase                                            | 2.28  |
| b1110 | ycfJ | Isolate 1 | non-essential | predicted protein                                                                            | 0.08  |
| b1110 | ycfJ | Isolate 2 | non-essential | predicted protein                                                                            | -0.49 |
| b1111 | ycfQ | Isolate 1 | non-essential | predicted DNA-binding transcriptional regulator                                              | -0.53 |
| b1111 | ycfQ | Isolate 2 | non-essential | predicted DNA-binding transcriptional regulator                                              | 0.08  |
| b1112 | ycfR | Isolate 1 | non-essential | predicted protein                                                                            | -0.27 |
| b1112 | ycfR | Isolate 2 | non-essential | predicted protein                                                                            | 2.26  |
| b1113 | ycfS | Isolate 1 | non-essential | conserved protein                                                                            | 3.70  |
| b1113 | ycfS | Isolate 2 | non-essential | conserved protein                                                                            | 1.57  |
| b1114 | mfd  | Isolate 1 | non-essential | transcription-repair coupling factor                                                         | 1.51  |
| b1114 | mfd  | Isolate 2 | non-essential | transcription-repair coupling factor                                                         | 0.73  |
| b1115 | ycfT | Isolate 1 | non-essential | predicted inner membrane protein                                                             | 0.44  |

|       |      |           |               |                                                                                             |       |
|-------|------|-----------|---------------|---------------------------------------------------------------------------------------------|-------|
| b1115 | ycfT | Isolate 2 | non-essential | predicted inner membrane protein                                                            | 2.00  |
| b1119 | ycfX | Isolate 1 | non-essential | predicted DNA-binding transcriptional regulator                                             | 1.82  |
| b1119 | ycfX | Isolate 2 | non-essential | predicted DNA-binding transcriptional regulator                                             | 1.49  |
| b1120 | cobB | Isolate 1 | non-essential | deacetylase of acetyl-CoA synthetase, NAD-dependent                                         | 1.10  |
| b1120 | cobB | Isolate 2 | non-essential | deacetylase of acetyl-CoA synthetase, NAD-dependent                                         | -0.98 |
| b1122 | ymfA | Isolate 1 | non-essential | predicted inner membrane protein                                                            | 0.18  |
| b1122 | ymfA | Isolate 2 | non-essential | predicted inner membrane protein                                                            | 1.21  |
| b1123 | potD | Isolate 1 | non-essential | polyamine transporter subunit -!- periplasmic-binding component of ABC superfamily          | -1.60 |
| b1123 | potD | Isolate 2 | non-essential | polyamine transporter subunit -!- periplasmic-binding component of ABC superfamily          | -0.44 |
| b1124 | potC | Isolate 1 | non-essential | polyamine transporter subunit -!- membrane component of ABC superfamily                     | -0.09 |
| b1124 | potC | Isolate 2 | non-essential | polyamine transporter subunit -!- membrane component of ABC superfamily                     | 1.85  |
| b1125 | potB | Isolate 1 | non-essential | polyamine transporter subunit -!- membrane component of ABC superfamily                     | 3.39  |
| b1125 | potB | Isolate 2 | non-essential | polyamine transporter subunit -!- membrane component of ABC superfamily                     | 1.09  |
| b1126 | potA | Isolate 1 | non-essential | polyamine transporter subunit -!- ATP-binding component of ABC superfamily                  | 1.97  |
| b1126 | potA | Isolate 2 | non-essential | polyamine transporter subunit -!- ATP-binding component of ABC superfamily                  | 0.74  |
| b1127 | pepT | Isolate 1 | non-essential | peptidase T                                                                                 | 0.00  |
| b1127 | pepT | Isolate 2 | non-essential | peptidase T                                                                                 | 1.55  |
| b1128 | ycfD | Isolate 1 | non-essential | conserved protein                                                                           | 0.33  |
| b1128 | ycfD | Isolate 2 | non-essential | conserved protein                                                                           | 0.49  |
| b1129 | phoQ | Isolate 1 | non-essential | sensory histidine kinase in two-compoent regulatory system with PhoP                        | 0.44  |
| b1129 | phoQ | Isolate 2 | non-essential | sensory histidine kinase in two-compoent regulatory system with PhoP                        | -8.35 |
| b1130 | phoP | Isolate 1 | non-essential | DNA-binding response regulator in two-component regulatory system with PhoQ                 | 1.78  |
| b1130 | phoP | Isolate 2 | non-essential | DNA-binding response regulator in two-component regulatory system with PhoQ                 | 0.64  |
| b1131 | purB | Isolate 1 | essential     | adenylosuccinate lyase                                                                      | -2.67 |
| b1132 | hflD | Isolate 1 | non-essential | predicted lysogenization regulator                                                          | 0.64  |
| b1132 | hflD | Isolate 2 | non-essential | predicted lysogenization regulator                                                          | 0.46  |
| b1133 | trmU | Isolate 1 | non-essential | tRNA (5-methylaminomethyl-2-thiouridylate)-methyltransferase                                | 0.14  |
| b1133 | trmU | Isolate 2 | non-essential | tRNA (5-methylaminomethyl-2-thiouridylate)-methyltransferase                                | 2.12  |
| b1134 | ymfB | Isolate 1 | non-essential | bifunctional thiamin pyrimidine pyrophosphate hydrolase -!- thiamin pyrophosphate hydrolase | 1.46  |
| b1134 | ymfB | Isolate 2 | non-essential | bifunctional thiamin pyrimidine pyrophosphate hydrolase -!- thiamin pyrophosphate hydrolase | 0.95  |
| b1135 | ymfC | Isolate 1 | non-essential | 23S rRNA pseudouridine synthase                                                             | 0.25  |
| b1135 | ymfC | Isolate 2 | non-essential | 23S rRNA pseudouridine synthase                                                             | 0.32  |
| b1136 | icd  | Isolate 1 | non-essential | e14 prophage; isocitrate dehydrogenase, specific for NADP+                                  | 0.78  |
| b1136 | icd  | Isolate 2 | non-essential | e14 prophage; isocitrate dehydrogenase, specific for NADP+                                  | 1.19  |
| b1137 | ymfD | Isolate 1 | non-essential | e14 prophage; predicted SAM-dependent methyltransferase                                     | 0.87  |
| b1137 | ymfD | Isolate 2 | non-essential | e14 prophage; predicted SAM-dependent methyltransferase                                     | 0.24  |
| b1138 | ymfE | Isolate 1 | non-essential | e14 prophage; predicted inner membrane protein                                              | -0.03 |
| b1138 | ymfE | Isolate 2 | non-essential | e14 prophage; predicted inner membrane protein                                              | 0.47  |
| b1139 | lit  | Isolate 1 | non-essential | e14 prophage; cell death peptidase, inhibitor of T4 late gene expression                    | 1.97  |
| b1139 | lit  | Isolate 2 | non-essential | e14 prophage; cell death peptidase, inhibitor of T4 late gene expression                    | 1.05  |
| b1140 | intE | Isolate 1 | non-essential | e14 prophage; predicted integrase                                                           | 3.97  |
| b1140 | intE | Isolate 2 | non-essential | e14 prophage; predicted integrase                                                           | 0.23  |
| b1141 | ymfG | Isolate 1 | non-essential | e14 prophage; predicted excisionase                                                         | 0.75  |

|       |      |           |               |                                                                       |       |
|-------|------|-----------|---------------|-----------------------------------------------------------------------|-------|
| b1141 | yfmG | Isolate 2 | non-essential | e14 prophage; predicted excisionase                                   | 0.31  |
| b1142 | yfmH | Isolate 1 | non-essential | e14 prophage; predicted protein                                       | 0.25  |
| b1142 | yfmH | Isolate 2 | non-essential | e14 prophage; predicted protein                                       | 0.82  |
| b1143 | yfmI | Isolate 1 | non-essential | e14 prophage; predicted protein                                       | 0.58  |
| b1143 | yfmI | Isolate 2 | non-essential | e14 prophage; predicted protein                                       | -1.06 |
| b1144 | yfmJ | Isolate 1 | non-essential | e14 prophage; predicted protein                                       | 0.83  |
| b1144 | yfmJ | Isolate 2 | non-essential | e14 prophage; predicted protein                                       | -1.03 |
| b1146 | yfmT | Isolate 1 | non-essential | e14 prophage; predicted DNA-binding transcriptional regulator         | 0.18  |
| b1146 | yfmT | Isolate 2 | non-essential | e14 prophage; predicted DNA-binding transcriptional regulator         | 1.35  |
| b1147 | yfmL | Isolate 1 | non-essential | e14 prophage; predicted DNA-binding transcriptional regulator         | 1.90  |
| b1147 | yfmL | Isolate 2 | non-essential | e14 prophage; predicted DNA-binding transcriptional regulator         | -0.04 |
| b1148 | yfmM | Isolate 1 | non-essential | e14 prophage; predicted protein                                       | 0.15  |
| b1148 | yfmM | Isolate 2 | non-essential | e14 prophage; predicted protein                                       | -0.23 |
| b1149 | yfmN | Isolate 1 | non-essential | e14 prophage; predicted DNA-binding transcriptional regulator         | 0.03  |
| b1149 | yfmN | Isolate 2 | non-essential | e14 prophage; predicted DNA-binding transcriptional regulator         | 0.21  |
| b1150 | yfmR | Isolate 1 | non-essential | e14 prophage; predicted protein                                       | 1.59  |
| b1150 | yfmR | Isolate 2 | non-essential | e14 prophage; predicted protein                                       | -0.11 |
| b1151 | yfmO | Isolate 1 | non-essential | e14 prophage; conserved protein                                       | -0.91 |
| b1151 | yfmO | Isolate 2 | non-essential | e14 prophage; conserved protein                                       | 1.33  |
| b1152 | yfmP | Isolate 1 | non-essential | e14 prophage; conserved protein                                       | -1.16 |
| b1152 | yfmP | Isolate 2 | non-essential | e14 prophage; conserved protein                                       | -0.22 |
| b1153 | yfmQ | Isolate 1 | non-essential | e14 prophage; conserved protein                                       | 0.52  |
| b1153 | yfmQ | Isolate 2 | non-essential | e14 prophage; conserved protein                                       | 0.67  |
| b1154 | ycfK | Isolate 1 | non-essential | e14 prophage; predicted protein                                       | 2.23  |
| b1154 | ycfK | Isolate 2 | non-essential | e14 prophage; predicted protein                                       | -1.00 |
| b1155 | yfmS | Isolate 1 | non-essential | e14 prophage; predicted protein                                       | -0.93 |
| b1155 | yfmS | Isolate 2 | non-essential | e14 prophage; predicted protein                                       | -0.33 |
| b1156 | tfaE | Isolate 1 | non-essential | e14 prophage; predicted tail fiber assembly protein                   | 0.75  |
| b1156 | tfaE | Isolate 2 | non-essential | e14 prophage; predicted tail fiber assembly protein                   | 0.52  |
| b1157 | stfE | Isolate 1 | *             | e14 prophage; predicted side tail fiber protein fragment (pseudogene) | 1.45  |
| b1157 | stfE | Isolate 2 | *             | e14 prophage; predicted side tail fiber protein fragment (pseudogene) | 0.83  |
| b1158 | pin  | Isolate 1 | non-essential | e14 prophage; site-specific DNA recombinase                           | 0.27  |
| b1158 | pin  | Isolate 2 | non-essential | e14 prophage; site-specific DNA recombinase                           | 0.62  |
| b1159 | mcrA | Isolate 1 | non-essential | e14 prophage; 5-methylcytosine-specific restriction endonuclease B    | 0.17  |
| b1159 | mcrA | Isolate 2 | non-essential | e14 prophage; 5-methylcytosine-specific restriction endonuclease B    | 0.77  |
| b1160 | elbA | Isolate 1 | non-essential | predicted protein                                                     | 1.02  |
| b1160 | elbA | Isolate 2 | non-essential | predicted protein                                                     | 1.79  |
| b1161 | ycgX | Isolate 1 | non-essential | predicted protein                                                     | -0.76 |
| b1161 | ycgX | Isolate 2 | non-essential | predicted protein                                                     | -1.59 |
| b1162 | ycgE | Isolate 1 | non-essential | predicted DNA-binding transcriptional regulator                       | 0.63  |
| b1162 | ycgE | Isolate 2 | non-essential | predicted DNA-binding transcriptional regulator                       | 1.36  |
| b1163 | ycgF | Isolate 1 | non-essential | predicted FAD-binding phosphodiesterase                               | 5.02  |
| b1163 | ycgF | Isolate 2 | non-essential | predicted FAD-binding phosphodiesterase                               | 1.30  |



|       |      |           |               |                                                                                 |       |
|-------|------|-----------|---------------|---------------------------------------------------------------------------------|-------|
| b1164 | ycgZ | Isolate 1 | non-essential | predicted protein                                                               | 1.02  |
| b1164 | ycgZ | Isolate 2 | non-essential | predicted protein                                                               | -0.58 |
| b1165 | ymgA | Isolate 1 | non-essential | predicted protein                                                               | 0.67  |
| b1165 | ymgA | Isolate 2 | non-essential | predicted protein                                                               | 0.04  |
| b1166 | ymgB | Isolate 1 | non-essential | predicted protein                                                               | 0.04  |
| b1166 | ymgB | Isolate 2 | non-essential | predicted protein                                                               | -1.16 |
| b1167 | ymgC | Isolate 1 | non-essential | predicted protein                                                               | 0.01  |
| b1167 | ymgC | Isolate 2 | non-essential | predicted protein                                                               | 1.62  |
| b1168 | ycgG | Isolate 1 | non-essential | conserved inner membrane protein                                                | 0.44  |
| b1168 | ycgG | Isolate 2 | non-essential | conserved inner membrane protein                                                | -0.07 |
| b1169 | ycgH | Isolate 1 | *             | predicted protein, N-ter fragment (pseudogene)                                  | 2.00  |
| b1169 | ycgH | Isolate 2 | *             | predicted protein, N-ter fragment (pseudogene)                                  | 4.01  |
| b1170 | ycgH | Isolate 1 | *             | predicted protein, C-ter fragment (pseudogene)                                  | -0.63 |
| b1170 | ycgH | Isolate 2 | *             | predicted protein, C-ter fragment (pseudogene)                                  | 1.08  |
| b1171 | ymgD | Isolate 1 | non-essential | predicted protein                                                               | -0.69 |
| b1171 | ymgD | Isolate 2 | non-essential | predicted protein                                                               | 1.24  |
| b1172 | ymgG | Isolate 1 | non-essential | predicted protein                                                               | 0.43  |
| b1172 | ymgG | Isolate 2 | non-essential | predicted protein                                                               | 1.76  |
| b1173 | ycgI | Isolate 1 | non-essential | predicted protein                                                               | -0.22 |
| b1173 | ycgI | Isolate 2 | non-essential | predicted protein                                                               | 0.44  |
| b1176 | minC | Isolate 1 | non-essential | cell division inhibitor                                                         | 1.35  |
| b1176 | minC | Isolate 2 | non-essential | cell division inhibitor                                                         | 0.22  |
| b1177 | ycgJ | Isolate 1 | non-essential | predicted protein                                                               | 0.20  |
| b1177 | ycgJ | Isolate 2 | non-essential | predicted protein                                                               | 0.81  |
| b1178 | ycgK | Isolate 1 | non-essential | predicted protein                                                               | -3.09 |
| b1178 | ycgK | Isolate 2 | non-essential | predicted protein                                                               | 1.78  |
| b1179 | ycgL | Isolate 1 | non-essential | conserved protein                                                               | 0.83  |
| b1179 | ycgL | Isolate 2 | non-essential | conserved protein                                                               | 2.28  |
| b1180 | ycgM | Isolate 1 | non-essential | predicted isomerase/hydrolase                                                   | -0.74 |
| b1180 | ycgM | Isolate 2 | non-essential | predicted isomerase/hydrolase                                                   | -0.33 |
| b1181 | ycgN | Isolate 1 | non-essential | conserved protein                                                               | 1.30  |
| b1181 | ycgN | Isolate 2 | non-essential | conserved protein                                                               | 1.54  |
| b1182 | hlyE | Isolate 1 | non-essential | hemolysin E                                                                     | -0.05 |
| b1182 | hlyE | Isolate 2 | non-essential | hemolysin E                                                                     | 0.09  |
| b1183 | umuD | Isolate 1 | non-essential | DNA polymerase V, subunit D                                                     | -1.02 |
| b1183 | umuD | Isolate 2 | non-essential | DNA polymerase V, subunit D                                                     | 0.80  |
| b1184 | umuC | Isolate 1 | non-essential | DNA polymerase V, subunit C                                                     | -0.24 |
| b1184 | umuC | Isolate 2 | non-essential | DNA polymerase V, subunit C                                                     | 0.23  |
| b1185 | dsbB | Isolate 1 | non-essential | oxidoreductase that catalyzes reoxidation of DsbA protein disulfide isomerase I | -2.48 |
| b1185 | dsbB | Isolate 2 | non-essential | oxidoreductase that catalyzes reoxidation of DsbA protein disulfide isomerase I | 0.03  |
| b1186 | nhaB | Isolate 1 | non-essential | sodium:proton antiporter                                                        | 0.29  |
| b1186 | nhaB | Isolate 2 | non-essential | sodium:proton antiporter                                                        | 1.36  |
| b1187 | fadR | Isolate 1 | non-essential | DNA-binding transcriptional dual regulator                                      | -0.84 |

|       |      |           |               |                                                                                     |       |
|-------|------|-----------|---------------|-------------------------------------------------------------------------------------|-------|
| b1187 | fadR | Isolate 2 | non-essential | DNA-binding transcriptional dual regulator                                          | 0.78  |
| b1188 | ycgB | Isolate 1 | non-essential | conserved protein                                                                   | 0.25  |
| b1188 | ycgB | Isolate 2 | non-essential | conserved protein                                                                   | -0.28 |
| b1189 | dadA | Isolate 1 | non-essential | D-amino acid dehydrogenase                                                          | -0.49 |
| b1189 | dadA | Isolate 2 | non-essential | D-amino acid dehydrogenase                                                          | -1.32 |
| b1190 | dadX | Isolate 1 | non-essential | alanine racemase 2, PLP-binding                                                     | 0.61  |
| b1190 | dadX | Isolate 2 | non-essential | alanine racemase 2, PLP-binding                                                     | 0.09  |
| b1191 | cvrA | Isolate 1 | non-essential | predicted cation/proton antiporter                                                  | -0.29 |
| b1191 | cvrA | Isolate 2 | non-essential | predicted cation/proton antiporter                                                  | -1.28 |
| b1192 | ldcA | Isolate 1 | non-essential | L,D-carboxypeptidase A                                                              | -0.54 |
| b1192 | ldcA | Isolate 2 | non-essential | L,D-carboxypeptidase A                                                              | -0.22 |
| b1193 | emtA | Isolate 1 | non-essential | lytic murein endotransglycosylase E                                                 | 1.29  |
| b1193 | emtA | Isolate 2 | non-essential | lytic murein endotransglycosylase E                                                 | 1.35  |
| b1194 | ycgR | Isolate 1 | non-essential | protein involved in flagellar function                                              | -0.63 |
| b1194 | ycgR | Isolate 2 | non-essential | protein involved in flagellar function                                              | 1.38  |
| b1195 | ymgE | Isolate 1 | non-essential | predicted inner membrane protein                                                    | -0.20 |
| b1195 | ymgE | Isolate 2 | non-essential | predicted inner membrane protein                                                    | 1.29  |
| b1196 | ycgY | Isolate 1 | non-essential | predicted protein                                                                   | 0.90  |
| b1196 | ycgY | Isolate 2 | non-essential | predicted protein                                                                   | -0.82 |
| b1197 | treA | Isolate 1 | non-essential | periplasmic trehalase                                                               | 0.51  |
| b1197 | treA | Isolate 2 | non-essential | periplasmic trehalase                                                               | 1.37  |
| b1198 | dhaH | Isolate 1 | non-essential | fused predicted dihydroxyacetone-specific PTS enzyme HPr component -!- EI component | 1.56  |
| b1198 | dhaH | Isolate 2 | non-essential | fused predicted dihydroxyacetone-specific PTS enzyme HPr component -!- EI component | 0.23  |
| b1199 | dhaL | Isolate 1 | non-essential | dihydroxyacetone kinase, C-terminal domain                                          | 1.94  |
| b1199 | dhaL | Isolate 2 | non-essential | dihydroxyacetone kinase, C-terminal domain                                          | -0.12 |
| b1200 | dhaK | Isolate 1 | non-essential | dihydroxyacetone kinase, N-terminal domain                                          | 0.03  |
| b1200 | dhaK | Isolate 2 | non-essential | dihydroxyacetone kinase, N-terminal domain                                          | -0.28 |
| b1201 | dhaR | Isolate 1 | non-essential | predicted DNA-binding transcriptional regulator, dihydroxyacetone                   | -1.30 |
| b1201 | dhaR | Isolate 2 | non-essential | predicted DNA-binding transcriptional regulator, dihydroxyacetone                   | -2.17 |
| b1202 | ycgV | Isolate 1 | non-essential | predicted adhesin                                                                   | 2.33  |
| b1202 | ycgV | Isolate 2 | non-essential | predicted adhesin                                                                   | 0.59  |
| b1203 | ychF | Isolate 1 | non-essential | predicted GTP-binding protein                                                       | 0.38  |
| b1203 | ychF | Isolate 2 | non-essential | predicted GTP-binding protein                                                       | 0.78  |
| b1204 | pth  | Isolate 1 | essential     | peptidyl-tRNA hydrolase                                                             | -0.45 |
| b1205 | ychH | Isolate 1 | non-essential | predicted inner membrane protein                                                    | -9.11 |
| b1205 | ychH | Isolate 2 | non-essential | predicted inner membrane protein                                                    | 0.57  |
| b1206 | ychM | Isolate 1 | non-essential | predicted transporter                                                               | 1.29  |
| b1206 | ychM | Isolate 2 | non-essential | predicted transporter                                                               | 2.79  |
| b1207 | prsA | Isolate 1 | essential     | phosphoribosylpyrophosphate synthase                                                | 0.08  |
| b1208 | ispE | Isolate 1 | essential     | 4-diphosphocytidyl-2-C-methylerythritol kinase                                      | 5.43  |
| b1209 | lolB | Isolate 1 | essential     | chaperone for lipoproteins                                                          | -1.58 |
| b1211 | prfA | Isolate 1 | essential     | peptide chain release factor RF-1                                                   | -0.47 |
| b1213 | ychQ | Isolate 1 | non-essential | predicted transcriptional regulator                                                 | -1.17 |

|       |      |           |               |                                                                                       |       |
|-------|------|-----------|---------------|---------------------------------------------------------------------------------------|-------|
| b1213 | ychQ | Isolate 2 | non-essential | predicted transcriptional regulator                                                   | 2.01  |
| b1214 | ychA | Isolate 1 | non-essential | predicted transcriptional regulator                                                   | 1.53  |
| b1214 | ychA | Isolate 2 | non-essential | predicted transcriptional regulator                                                   | -1.12 |
| b1215 | kdsA | Isolate 1 | essential     | 3-deoxy-D-manno-octulosonate 8-phosphate synthase                                     | 0.78  |
| b1216 | chaA | Isolate 1 | non-essential | calcium/sodium:proton antiporter                                                      | 2.68  |
| b1216 | chaA | Isolate 2 | non-essential | calcium/sodium:proton antiporter                                                      | 1.35  |
| b1217 | chaB | Isolate 1 | non-essential | predicted cation regulator                                                            | 0.19  |
| b1217 | chaB | Isolate 2 | non-essential | predicted cation regulator                                                            | 0.13  |
| b1218 | chaC | Isolate 1 | non-essential | regulatory protein for cation transport                                               | 0.10  |
| b1218 | chaC | Isolate 2 | non-essential | regulatory protein for cation transport                                               | 0.92  |
| b1219 | ychN | Isolate 1 | non-essential | conserved protein                                                                     | 0.56  |
| b1219 | ychN | Isolate 2 | non-essential | conserved protein                                                                     | 3.48  |
| b1220 | ychP | Isolate 1 | non-essential | predicted invasin                                                                     | 1.78  |
| b1220 | ychP | Isolate 2 | non-essential | predicted invasin                                                                     | -0.18 |
| b1221 | narL | Isolate 1 | non-essential | DNA-binding response regulator in two-component regulatory system with NarX (or NarQ) | 0.00  |
| b1221 | narL | Isolate 2 | non-essential | DNA-binding response regulator in two-component regulatory system with NarX (or NarQ) | 0.81  |
| b1222 | narX | Isolate 1 | non-essential | sensory histidine kinase in two-component regulatory system with NarL                 | 0.58  |
| b1222 | narX | Isolate 2 | non-essential | sensory histidine kinase in two-component regulatory system with NarL                 | 0.40  |
| b1223 | narK | Isolate 1 | non-essential | nitrate/nitrite transporter                                                           | 0.92  |
| b1223 | narK | Isolate 2 | non-essential | nitrate/nitrite transporter                                                           | 1.33  |
| b1224 | narG | Isolate 1 | non-essential | nitrate reductase 1, alpha subunit                                                    | 0.32  |
| b1224 | narG | Isolate 2 | non-essential | nitrate reductase 1, alpha subunit                                                    | -1.24 |
| b1225 | narH | Isolate 1 | non-essential | nitrate reductase 1, beta (Fe-S) subunit                                              | 2.50  |
| b1225 | narH | Isolate 2 | non-essential | nitrate reductase 1, beta (Fe-S) subunit                                              | 1.26  |
| b1226 | narJ | Isolate 1 | non-essential | molybdenum-cofactor-assembly chaperone subunit (delta subunit) of nitrate reductase 1 | -2.03 |
| b1226 | narJ | Isolate 2 | non-essential | molybdenum-cofactor-assembly chaperone subunit (delta subunit) of nitrate reductase 1 | -1.25 |
| b1227 | narI | Isolate 1 | non-essential | nitrate reductase 1, gamma (cytochrome b(NR)) subunit                                 | -0.07 |
| b1227 | narI | Isolate 2 | non-essential | nitrate reductase 1, gamma (cytochrome b(NR)) subunit                                 | 0.26  |
| b1229 | tpr  | Isolate 1 | non-essential | predicted protamine-like protein                                                      | -1.94 |
| b1229 | tpr  | Isolate 2 | non-essential | predicted protamine-like protein                                                      | -1.75 |
| b1232 | purU | Isolate 1 | non-essential | formyltetrahydrofolate hydrolase                                                      | 0.76  |
| b1232 | purU | Isolate 2 | non-essential | formyltetrahydrofolate hydrolase                                                      | 1.27  |
| b1233 | ychJ | Isolate 1 | non-essential | conserved protein                                                                     | -1.64 |
| b1233 | ychJ | Isolate 2 | non-essential | conserved protein                                                                     | -0.33 |
| b1234 | rssA | Isolate 1 | non-essential | conserved protein                                                                     | -0.18 |
| b1234 | rssA | Isolate 2 | non-essential | conserved protein                                                                     | 2.92  |
| b1235 | rssB | Isolate 1 | non-essential | response regulator of RpoS                                                            | 0.76  |
| b1235 | rssB | Isolate 2 | non-essential | response regulator of RpoS                                                            | 2.03  |
| b1236 | galU | Isolate 1 | non-essential | glucose-1-phosphate uridylyltransferase                                               | 2.46  |
| b1236 | galU | Isolate 2 | non-essential | glucose-1-phosphate uridylyltransferase                                               | -1.66 |
| b1237 | hns  | Isolate 1 | non-essential | global DNA-binding transcriptional dual regulator H-NS                                | 0.21  |
| b1237 | hns  | Isolate 2 | non-essential | global DNA-binding transcriptional dual regulator H-NS                                | 0.82  |
| b1238 | tdk  | Isolate 1 | non-essential | thymidine kinase/deoxyuridine kinase                                                  | 0.65  |

|       |      |           |               |                                                                                                                     |        |
|-------|------|-----------|---------------|---------------------------------------------------------------------------------------------------------------------|--------|
| b1238 | tdk  | Isolate 2 | non-essential | thymidine kinase/deoxyuridine kinase                                                                                | -4.67  |
| b1241 | adhE | Isolate 1 | non-essential | fused acetaldehyde-CoA dehydrogenase -!- iron-dependent alcohol dehydrogenase -!- pyruvate-formate lyase deactivase | 0.44   |
| b1241 | adhE | Isolate 2 | non-essential | fused acetaldehyde-CoA dehydrogenase -!- iron-dependent alcohol dehydrogenase -!- pyruvate-formate lyase deactivase | -0.42  |
| b1242 | ychE | Isolate 1 | non-essential | predicted inner membrane protein                                                                                    | -0.45  |
| b1242 | ychE | Isolate 2 | non-essential | predicted inner membrane protein                                                                                    | -0.18  |
| b1243 | oppA | Isolate 1 | non-essential | oligopeptide transporter subunit -!- periplasmic-binding component of ABC superfamily                               | -0.85  |
| b1243 | oppA | Isolate 2 | non-essential | oligopeptide transporter subunit -!- periplasmic-binding component of ABC superfamily                               | -0.14  |
| b1244 | oppB | Isolate 1 | non-essential | oligopeptide transporter subunit -!- membrane component of ABC superfamily                                          | 1.18   |
| b1244 | oppB | Isolate 2 | non-essential | oligopeptide transporter subunit -!- membrane component of ABC superfamily                                          | 0.88   |
| b1245 | oppC | Isolate 1 | non-essential | oligopeptide transporter subunit -!- membrane component of ABC superfamily                                          | 0.06   |
| b1245 | oppC | Isolate 2 | non-essential | oligopeptide transporter subunit -!- membrane component of ABC superfamily                                          | 0.69   |
| b1246 | oppD | Isolate 1 | non-essential | oligopeptide transporter subunit -!- ATP-binding component of ABC superfamily                                       | 0.90   |
| b1246 | oppD | Isolate 2 | non-essential | oligopeptide transporter subunit -!- ATP-binding component of ABC superfamily                                       | 1.35   |
| b1247 | oppF | Isolate 1 | non-essential | oligopeptide transporter subunit -!- ATP-binding component of ABC superfamily                                       | 0.82   |
| b1247 | oppF | Isolate 2 | non-essential | oligopeptide transporter subunit -!- ATP-binding component of ABC superfamily                                       | 2.57   |
| b1248 | yciU | Isolate 1 | non-essential | predicted protein                                                                                                   | -2.67  |
| b1248 | yciU | Isolate 2 | non-essential | predicted protein                                                                                                   | -0.47  |
| b1249 | cls  | Isolate 1 | non-essential | cardiolipin synthase 1                                                                                              | 2.09   |
| b1249 | cls  | Isolate 2 | non-essential | cardiolipin synthase 1                                                                                              | 0.47   |
| b1250 | kch  | Isolate 1 | non-essential | voltage-gated potassium channel                                                                                     | 1.96   |
| b1250 | kch  | Isolate 2 | non-essential | voltage-gated potassium channel                                                                                     | 2.50   |
| b1251 | yciI | Isolate 1 | non-essential | predicted enzyme                                                                                                    | 0.74   |
| b1251 | yciI | Isolate 2 | non-essential | predicted enzyme                                                                                                    | -0.28  |
| b1252 | tonB | Isolate 1 | non-essential | membrane spanning protein in TonB-ExbB-ExbD complex                                                                 | -0.21  |
| b1252 | tonB | Isolate 2 | non-essential | membrane spanning protein in TonB-ExbB-ExbD complex                                                                 | -2.13  |
| b1253 | yciA | Isolate 1 | non-essential | predicted hydrolase                                                                                                 | 0.28   |
| b1253 | yciA | Isolate 2 | non-essential | predicted hydrolase                                                                                                 | 0.04   |
| b1254 | yciB | Isolate 1 | non-essential | predicted inner membrane protein                                                                                    | 1.19   |
| b1254 | yciB | Isolate 2 | non-essential | predicted inner membrane protein                                                                                    | 0.07   |
| b1255 | yciC | Isolate 1 | non-essential | predicted inner membrane protein                                                                                    | -11.53 |
| b1255 | yciC | Isolate 2 | non-essential | predicted inner membrane protein                                                                                    | 0.03   |
| b1256 | ompW | Isolate 1 | non-essential | outer membrane protein W                                                                                            | 2.44   |
| b1256 | ompW | Isolate 2 | non-essential | outer membrane protein W                                                                                            | -0.59  |
| b1257 | yciE | Isolate 1 | non-essential | conserved protein                                                                                                   | -0.73  |
| b1257 | yciE | Isolate 2 | non-essential | conserved protein                                                                                                   | -0.33  |
| b1258 | yciF | Isolate 1 | non-essential | conserved protein                                                                                                   | -0.16  |
| b1258 | yciF | Isolate 2 | non-essential | conserved protein                                                                                                   | 0.09   |
| b1259 | yciG | Isolate 1 | non-essential | predicted protein                                                                                                   | -12.55 |
| b1259 | yciG | Isolate 2 | non-essential | predicted protein                                                                                                   | -0.19  |
| b1260 | trpA | Isolate 1 | non-essential | tryptophan synthase, alpha subunit                                                                                  | 1.60   |
| b1260 | trpA | Isolate 2 | non-essential | tryptophan synthase, alpha subunit                                                                                  | 1.28   |
| b1261 | trpB | Isolate 1 | non-essential | tryptophan synthase, beta subunit                                                                                   | 1.04   |
| b1261 | trpB | Isolate 2 | non-essential | tryptophan synthase, beta subunit                                                                                   | 0.07   |

|         |      |           |               |                                                                                                                      |       |
|---------|------|-----------|---------------|----------------------------------------------------------------------------------------------------------------------|-------|
| b1262   | trpC | Isolate 1 | non-essential | fused indole-3-glycerolphosphate synthetase -!- N-(5-phosphoribosyl)anthranilate isomerase                           | 0.87  |
| b1262   | trpC | Isolate 2 | non-essential | fused indole-3-glycerolphosphate synthetase -!- N-(5-phosphoribosyl)anthranilate isomerase                           | -0.59 |
| b1263   | trpD | Isolate 1 | non-essential | fused glutamine amidotransferase (component II) of anthranilate synthase -!- anthranilate phosphoribosyl transferase | 4.69  |
| b1263   | trpD | Isolate 2 | non-essential | fused glutamine amidotransferase (component II) of anthranilate synthase -!- anthranilate phosphoribosyl transferase | 0.00  |
| b1264   | trpE | Isolate 1 | non-essential | component I of anthranilate synthase                                                                                 | 1.12  |
| b1264   | trpE | Isolate 2 | non-essential | component I of anthranilate synthase                                                                                 | 1.06  |
| b1265   | trpL | Isolate 1 | non-essential | trp operon leader peptide                                                                                            | 0.18  |
| b1265   | trpL | Isolate 2 | non-essential | trp operon leader peptide                                                                                            | 0.80  |
| b1266   | yciV | Isolate 1 | non-essential | conserved protein                                                                                                    | -1.14 |
| b1266   | yciV | Isolate 2 | non-essential | conserved protein                                                                                                    | 0.13  |
| b1267   | yciO | Isolate 1 | non-essential | conserved protein                                                                                                    | -1.04 |
| b1267   | yciO | Isolate 2 | non-essential | conserved protein                                                                                                    | -0.52 |
| b1268   | yciQ | Isolate 1 | non-essential | predicted inner membrane protein                                                                                     | 0.48  |
| b1268   | yciQ | Isolate 2 | non-essential | predicted inner membrane protein                                                                                     | 1.95  |
| b1269   | rluB | Isolate 1 | non-essential | 23S rRNA pseudouridylate synthase                                                                                    | 1.89  |
| b1269   | rluB | Isolate 2 | non-essential | 23S rRNA pseudouridylate synthase                                                                                    | 0.02  |
| b1270   | btuR | Isolate 1 | non-essential | cob(D)alamin adenolsyltransferase/cobinamide ATP-dependent adenolsyltransferase                                      | 1.58  |
| b1270   | btuR | Isolate 2 | non-essential | cob(D)alamin adenolsyltransferase/cobinamide ATP-dependent adenolsyltransferase                                      | 1.02  |
| b1271   | yciK | Isolate 1 | non-essential | predicted oxoacyl-(acyl carrier protein) reductase, EmrKY-TolC system                                                | -0.52 |
| b1271   | yciK | Isolate 2 | non-essential | predicted oxoacyl-(acyl carrier protein) reductase, EmrKY-TolC system                                                | 1.61  |
| b1272   | sohB | Isolate 1 | non-essential | predicted inner membrane peptidase                                                                                   | -1.33 |
| b1272   | sohB | Isolate 2 | non-essential | predicted inner membrane peptidase                                                                                   | 1.28  |
| b1273   | yciN | Isolate 1 | non-essential | predicted protein                                                                                                    | 0.37  |
| b1273   | yciN | Isolate 2 | non-essential | predicted protein                                                                                                    | 2.04  |
| b1274   | topA | Isolate 1 | essential     | DNA topoisomerase I, omega subunit                                                                                   | -0.67 |
| b1275   | cysB | Isolate 1 | non-essential | DNA-binding transcriptional dual regulator, O-acetyl-L-serine-binding                                                | -2.25 |
| b1275   | cysB | Isolate 2 | non-essential | DNA-binding transcriptional dual regulator, O-acetyl-L-serine-binding                                                | 1.26  |
| b1275.1 | *    | Isolate 1 | *             | *                                                                                                                    | -0.85 |
| b1275.1 | *    | Isolate 2 | *             | *                                                                                                                    | 0.37  |
| b1276   | acnA | Isolate 1 | non-essential | aconitate hydratase 1                                                                                                | 1.41  |
| b1276   | acnA | Isolate 2 | non-essential | aconitate hydratase 1                                                                                                | 1.22  |
| b1278   | pgpB | Isolate 1 | non-essential | phosphatidylglycerophosphate phosphatase B                                                                           | 2.26  |
| b1278   | pgpB | Isolate 2 | non-essential | phosphatidylglycerophosphate phosphatase B                                                                           | 2.51  |
| b1279   | yciS | Isolate 1 | non-essential | conserved inner membrane protein                                                                                     | 1.05  |
| b1279   | yciS | Isolate 2 | non-essential | conserved inner membrane protein                                                                                     | 3.58  |
| b1280   | yciM | Isolate 1 | non-essential | conserved protein                                                                                                    | 0.38  |
| b1280   | yciM | Isolate 2 | non-essential | conserved protein                                                                                                    | 6.05  |
| b1281   | pyrF | Isolate 1 | non-essential | orotidine-5'-phosphate decarboxylase                                                                                 | 0.46  |
| b1281   | pyrF | Isolate 2 | non-essential | orotidine-5'-phosphate decarboxylase                                                                                 | -1.67 |
| b1282   | yciH | Isolate 1 | non-essential | conserved protein                                                                                                    | -0.56 |
| b1282   | yciH | Isolate 2 | non-essential | conserved protein                                                                                                    | 3.19  |
| b1283   | osmB | Isolate 1 | non-essential | lipoprotein                                                                                                          | -0.87 |
| b1283   | osmB | Isolate 2 | non-essential | lipoprotein                                                                                                          | -1.55 |

|       |      |           |               |                                                                                                          |        |
|-------|------|-----------|---------------|----------------------------------------------------------------------------------------------------------|--------|
| b1284 | yciT | Isolate 1 | non-essential | predicted DNA-binding transcriptional regulator                                                          | 1.40   |
| b1284 | yciT | Isolate 2 | non-essential | predicted DNA-binding transcriptional regulator                                                          | 0.79   |
| b1285 | gmr  | Isolate 1 | non-essential | modulator of Rnase II stability                                                                          | -0.59  |
| b1285 | gmr  | Isolate 2 | non-essential | modulator of Rnase II stability                                                                          | -11.57 |
| b1286 | rnb  | Isolate 1 | non-essential | ribonuclease II                                                                                          | 0.36   |
| b1286 | rnb  | Isolate 2 | non-essential | ribonuclease II                                                                                          | -0.60  |
| b1287 | yciW | Isolate 1 | non-essential | predicted oxidoreductase                                                                                 | 0.76   |
| b1287 | yciW | Isolate 2 | non-essential | predicted oxidoreductase                                                                                 | 1.59   |
| b1288 | fabI | Isolate 1 | essential     | enoyl-[acyl-carrier-protein] reductase, NADH-dependent                                                   | 2.33   |
| b1289 | ycjD | Isolate 1 | non-essential | conserved protein                                                                                        | -0.62  |
| b1289 | ycjD | Isolate 2 | non-essential | conserved protein                                                                                        | -3.10  |
| b1290 | sapF | Isolate 1 | non-essential | predicted antimicrobial peptide transporter subunit -!- ATP-binding component of ABC superfamily         | 3.35   |
| b1290 | sapF | Isolate 2 | non-essential | predicted antimicrobial peptide transporter subunit -!- ATP-binding component of ABC superfamily         | -2.62  |
| b1291 | sapD | Isolate 1 | non-essential | predicted antimicrobial peptide transporter subunit -!- ATP-binding component of ABC superfamily         | -1.62  |
| b1291 | sapD | Isolate 2 | non-essential | predicted antimicrobial peptide transporter subunit -!- ATP-binding component of ABC superfamily         | -0.37  |
| b1292 | sapC | Isolate 1 | non-essential | predicted antimicrobial peptide transporter subunit -!- membrane component of ABC superfamily            | -0.39  |
| b1292 | sapC | Isolate 2 | non-essential | predicted antimicrobial peptide transporter subunit -!- membrane component of ABC superfamily            | 1.29   |
| b1293 | sapB | Isolate 1 | non-essential | predicted antimicrobial peptide transporter subunit -!- membrane component of ABC superfamily            | -1.41  |
| b1293 | sapB | Isolate 2 | non-essential | predicted antimicrobial peptide transporter subunit -!- membrane component of ABC superfamily            | 2.23   |
| b1294 | sapA | Isolate 1 | non-essential | predicted antimicrobial peptide transporter subunit -!- periplasmic-binding component of ABC superfamily | -0.51  |
| b1294 | sapA | Isolate 2 | non-essential | predicted antimicrobial peptide transporter subunit -!- periplasmic-binding component of ABC superfamily | -0.16  |
| b1295 | ymjA | Isolate 1 | non-essential | predicted protein                                                                                        | -0.02  |
| b1295 | ymjA | Isolate 2 | non-essential | predicted protein                                                                                        | -0.91  |
| b1296 | puuP | Isolate 1 | non-essential | putrescine importer                                                                                      | 1.14   |
| b1296 | puuP | Isolate 2 | non-essential | putrescine importer                                                                                      | -1.75  |
| b1297 | puuA | Isolate 1 | non-essential | gamma-Glu-putrescine synthase                                                                            | 1.97   |
| b1297 | puuA | Isolate 2 | non-essential | gamma-Glu-putrescine synthase                                                                            | -0.67  |
| b1298 | puuD | Isolate 1 | non-essential | gamma-Glu-GABA hydrolase                                                                                 | 0.59   |
| b1298 | puuD | Isolate 2 | non-essential | gamma-Glu-GABA hydrolase                                                                                 | 0.25   |
| b1299 | puuR | Isolate 1 | non-essential | DNA-binding transcriptional repressor                                                                    | -0.32  |
| b1299 | puuR | Isolate 2 | non-essential | DNA-binding transcriptional repressor                                                                    | -0.37  |
| b1300 | puuC | Isolate 1 | non-essential | gamma-Glu-gamma-aminobutyraldehyde dehydrogenase, NAD(P)H-dependent                                      | -0.03  |
| b1300 | puuC | Isolate 2 | non-essential | gamma-Glu-gamma-aminobutyraldehyde dehydrogenase, NAD(P)H-dependent                                      | -0.18  |
| b1301 | puuB | Isolate 1 | non-essential | gamma-Glu-putrescine oxidase, FAD/NAD(P)-binding                                                         | 1.24   |
| b1301 | puuB | Isolate 2 | non-essential | gamma-Glu-putrescine oxidase, FAD/NAD(P)-binding                                                         | -0.69  |
| b1302 | puuE | Isolate 1 | non-essential | GABA aminotransferase, PLP-dependent                                                                     | 1.13   |
| b1302 | puuE | Isolate 2 | non-essential | GABA aminotransferase, PLP-dependent                                                                     | 0.85   |
| b1303 | pspF | Isolate 1 | non-essential | DNA-binding transcriptional activator                                                                    | -1.66  |
| b1303 | pspF | Isolate 2 | non-essential | DNA-binding transcriptional activator                                                                    | 1.75   |
| b1304 | pspA | Isolate 1 | non-essential | regulatory protein for phage-shock-protein operon                                                        | -0.10  |
| b1304 | pspA | Isolate 2 | non-essential | regulatory protein for phage-shock-protein operon                                                        | 1.23   |
| b1305 | pspB | Isolate 1 | non-essential | transcriptional regulator of psp operon                                                                  | 0.83   |
| b1305 | pspB | Isolate 2 | non-essential | transcriptional regulator of psp operon                                                                  | 3.28   |

|       |      |           |               |                                                                                          |       |
|-------|------|-----------|---------------|------------------------------------------------------------------------------------------|-------|
| b1306 | pspC | Isolate 1 | non-essential | transcriptional activator                                                                | 3.44  |
| b1306 | pspC | Isolate 2 | non-essential | transcriptional activator                                                                | 0.95  |
| b1307 | pspD | Isolate 1 | non-essential | peripheral inner membrane phage-shock protein                                            | 3.13  |
| b1307 | pspD | Isolate 2 | non-essential | peripheral inner membrane phage-shock protein                                            | -1.80 |
| b1308 | pspE | Isolate 1 | non-essential | thiosulfate:cyanide sulfurtransferase (rhodanese)                                        | 4.52  |
| b1308 | pspE | Isolate 2 | non-essential | thiosulfate:cyanide sulfurtransferase (rhodanese)                                        | 3.01  |
| b1309 | ycjM | Isolate 1 | non-essential | predicted glucosyltransferase                                                            | 0.21  |
| b1309 | ycjM | Isolate 2 | non-essential | predicted glucosyltransferase                                                            | -1.37 |
| b1310 | ycjN | Isolate 1 | non-essential | predicted sugar transporter subunit -!- periplasmic-binding component of ABC superfamily | 0.84  |
| b1310 | ycjN | Isolate 2 | non-essential | predicted sugar transporter subunit -!- periplasmic-binding component of ABC superfamily | 1.72  |
| b1311 | ycjO | Isolate 1 | non-essential | predicted sugar transporter subunit -!- membrane component of ABC superfamily            | 0.09  |
| b1311 | ycjO | Isolate 2 | non-essential | predicted sugar transporter subunit -!- membrane component of ABC superfamily            | 0.02  |
| b1312 | ycjP | Isolate 1 | non-essential | predicted sugar transporter subunit -!- membrane component of ABC superfamily            | -1.61 |
| b1312 | ycjP | Isolate 2 | non-essential | predicted sugar transporter subunit -!- membrane component of ABC superfamily            | 1.58  |
| b1313 | ycjQ | Isolate 1 | non-essential | predicted oxidoreductase, Zn-dependent and NAD(P)-binding                                | -0.18 |
| b1313 | ycjQ | Isolate 2 | non-essential | predicted oxidoreductase, Zn-dependent and NAD(P)-binding                                | 0.28  |
| b1314 | ycjR | Isolate 1 | non-essential | predicted enzyme                                                                         | -0.53 |
| b1314 | ycjR | Isolate 2 | non-essential | predicted enzyme                                                                         | 3.78  |
| b1315 | ycjS | Isolate 1 | non-essential | predicted oxidoreductase, NADH-binding                                                   | -0.85 |
| b1315 | ycjS | Isolate 2 | non-essential | predicted oxidoreductase, NADH-binding                                                   | -0.90 |
| b1316 | ycjT | Isolate 1 | non-essential | predicted hydrolase                                                                      | 0.85  |
| b1316 | ycjT | Isolate 2 | non-essential | predicted hydrolase                                                                      | 0.31  |
| b1317 | ycjU | Isolate 1 | non-essential | predicted beta-phosphoglucomutase                                                        | 1.13  |
| b1317 | ycjU | Isolate 2 | non-essential | predicted beta-phosphoglucomutase                                                        | -0.71 |
| b1318 | ycjV | Isolate 1 | non-essential | predicted sugar transporter subunit -!- ATP-binding component of ABC superfamily         | 0.53  |
| b1318 | ycjV | Isolate 2 | non-essential | predicted sugar transporter subunit -!- ATP-binding component of ABC superfamily         | 1.89  |
| b1319 | ompG | Isolate 1 | non-essential | outer membrane porin                                                                     | -1.02 |
| b1319 | ompG | Isolate 2 | non-essential | outer membrane porin                                                                     | 0.18  |
| b1320 | ycjW | Isolate 1 | non-essential | predicted DNA-binding transcriptional regulator                                          | 0.20  |
| b1320 | ycjW | Isolate 2 | non-essential | predicted DNA-binding transcriptional regulator                                          | 1.69  |
| b1321 | ycjX | Isolate 1 | non-essential | conserved protein with nucleoside triphosphate hydrolase domain                          | 0.45  |
| b1321 | ycjX | Isolate 2 | non-essential | conserved protein with nucleoside triphosphate hydrolase domain                          | 0.18  |
| b1322 | ycjF | Isolate 1 | non-essential | conserved inner membrane protein                                                         | -0.01 |
| b1322 | ycjF | Isolate 2 | non-essential | conserved inner membrane protein                                                         | 0.90  |
| b1323 | tyrR | Isolate 1 | non-essential | DNA-binding transcriptional dual regulator, tyrosine-binding                             | 0.03  |
| b1323 | tyrR | Isolate 2 | non-essential | DNA-binding transcriptional dual regulator, tyrosine-binding                             | 0.09  |
| b1324 | tpx  | Isolate 1 | non-essential | lipid hydroperoxide peroxidase                                                           | 0.28  |
| b1324 | tpx  | Isolate 2 | non-essential | lipid hydroperoxide peroxidase                                                           | -0.06 |
| b1325 | ycjG | Isolate 1 | non-essential | L-Ala-D/L-Glu epimerase                                                                  | -0.25 |
| b1325 | ycjG | Isolate 2 | non-essential | L-Ala-D/L-Glu epimerase                                                                  | 0.57  |
| b1326 | mpaA | Isolate 1 | non-essential | murein peptide amidase A                                                                 | -0.38 |
| b1326 | mpaA | Isolate 2 | non-essential | murein peptide amidase A                                                                 | -3.04 |
| b1327 | ycjY | Isolate 1 | non-essential | predicted hydrolase                                                                      | 0.05  |

|       |      |           |               |                                                                                                                           |       |
|-------|------|-----------|---------------|---------------------------------------------------------------------------------------------------------------------------|-------|
| b1327 | ycjY | Isolate 2 | non-essential | predicted hydrolase                                                                                                       | -0.38 |
| b1328 | ycjZ | Isolate 1 | non-essential | predicted DNA-binding transcriptional regulator                                                                           | 0.75  |
| b1328 | ycjZ | Isolate 2 | non-essential | predicted DNA-binding transcriptional regulator                                                                           | 0.06  |
| b1329 | mppA | Isolate 1 | non-essential | murein tripeptide (L-ala-gamma-D-glutamyl-meso-DAP) transporter subunit -!- periplasmic-binding component of ABC superfam | 1.06  |
| b1329 | mppA | Isolate 2 | non-essential | murein tripeptide (L-ala-gamma-D-glutamyl-meso-DAP) transporter subunit -!- periplasmic-binding component of ABC superfam | 0.23  |
| b1330 | ynaI | Isolate 1 | non-essential | conserved inner membrane protein                                                                                          | 1.06  |
| b1330 | ynaI | Isolate 2 | non-essential | conserved inner membrane protein                                                                                          | -1.44 |
| b1332 | ynaJ | Isolate 1 | non-essential | predicted inner membrane protein                                                                                          | 0.16  |
| b1332 | ynaJ | Isolate 2 | non-essential | predicted inner membrane protein                                                                                          | -2.17 |
| b1333 | uspE | Isolate 1 | non-essential | stress-induced protein                                                                                                    | 1.28  |
| b1333 | uspE | Isolate 2 | non-essential | stress-induced protein                                                                                                    | 1.47  |
| b1334 | fnr  | Isolate 1 | non-essential | DNA-binding transcriptional dual regulator, global regulator of anaerobic growth                                          | -0.78 |
| b1334 | fnr  | Isolate 2 | non-essential | DNA-binding transcriptional dual regulator, global regulator of anaerobic growth                                          | -1.64 |
| b1335 | ogt  | Isolate 1 | non-essential | O-6-alkylguanine-DNA:cysteine-protein methyltransferase                                                                   | -0.95 |
| b1335 | ogt  | Isolate 2 | non-essential | O-6-alkylguanine-DNA:cysteine-protein methyltransferase                                                                   | 0.22  |
| b1336 | abgT | Isolate 1 | non-essential | predicted cryptic aminobenzoyl-glutamate transporter                                                                      | 1.21  |
| b1336 | abgT | Isolate 2 | non-essential | predicted cryptic aminobenzoyl-glutamate transporter                                                                      | -0.23 |
| b1337 | abgB | Isolate 1 | non-essential | predicted peptidase, aminobenzoyl-glutamate utilization protein                                                           | 5.00  |
| b1337 | abgB | Isolate 2 | non-essential | predicted peptidase, aminobenzoyl-glutamate utilization protein                                                           | 2.20  |
| b1338 | abgA | Isolate 1 | non-essential | predicted peptidase, aminobenzoyl-glutamate utilization protein                                                           | 0.45  |
| b1338 | abgA | Isolate 2 | non-essential | predicted peptidase, aminobenzoyl-glutamate utilization protein                                                           | 0.30  |
| b1339 | abgR | Isolate 1 | non-essential | predicted DNA-binding transcriptional regulator                                                                           | -0.22 |
| b1339 | abgR | Isolate 2 | non-essential | predicted DNA-binding transcriptional regulator                                                                           | 1.42  |
| b1340 | ydaL | Isolate 1 | non-essential | conserved protein                                                                                                         | 0.58  |
| b1340 | ydaL | Isolate 2 | non-essential | conserved protein                                                                                                         | 0.94  |
| b1341 | ydaM | Isolate 1 | non-essential | predicted diguanylate cyclase, GGDEF domain signalling protein                                                            | 1.23  |
| b1341 | ydaM | Isolate 2 | non-essential | predicted diguanylate cyclase, GGDEF domain signalling protein                                                            | -2.13 |
| b1342 | ydaN | Isolate 1 | non-essential | predicted Zn(II) transporter                                                                                              | -1.69 |
| b1342 | ydaN | Isolate 2 | non-essential | predicted Zn(II) transporter                                                                                              | 0.37  |
| b1343 | dbpA | Isolate 1 | non-essential | ATP-dependent RNA helicase specific for 23S rRNA                                                                          | -2.67 |
| b1343 | dbpA | Isolate 2 | non-essential | ATP-dependent RNA helicase specific for 23S rRNA                                                                          | -1.67 |
| b1344 | ydaO | Isolate 1 | non-essential | predicted C32 tRNA thiolase                                                                                               | 0.05  |
| b1344 | ydaO | Isolate 2 | non-essential | predicted C32 tRNA thiolase                                                                                               | -0.55 |
| b1345 | intR | Isolate 1 | non-essential | Rac prophage; integrase                                                                                                   | 1.60  |
| b1345 | intR | Isolate 2 | non-essential | Rac prophage; integrase                                                                                                   | 0.57  |
| b1346 | ydaQ | Isolate 1 | non-essential | Rac prophage; conserved protein                                                                                           | 0.11  |
| b1346 | ydaQ | Isolate 2 | non-essential | Rac prophage; conserved protein                                                                                           | -0.02 |
| b1347 | ydaC | Isolate 1 | non-essential | Rac prophage; predicted protein                                                                                           | 0.64  |
| b1347 | ydaC | Isolate 2 | non-essential | Rac prophage; predicted protein                                                                                           | -9.97 |
| b1348 | lar  | Isolate 1 | non-essential | Rac prophage; restriction alleviation protein                                                                             | -0.43 |
| b1348 | lar  | Isolate 2 | non-essential | Rac prophage; restriction alleviation protein                                                                             | -2.20 |
| b1349 | recT | Isolate 1 | non-essential | Rac prophage; recombination and repair protein                                                                            | 0.92  |
| b1349 | recT | Isolate 2 | non-essential | Rac prophage; recombination and repair protein                                                                            | -0.39 |



|       |      |           |               |                                                                     |       |
|-------|------|-----------|---------------|---------------------------------------------------------------------|-------|
| b1350 | recE | Isolate 1 | non-essential | Rac prophage; exonuclease VIII, 5' -> 3' specific dsDNA exonuclease | -0.02 |
| b1350 | recE | Isolate 2 | non-essential | Rac prophage; exonuclease VIII, 5' -> 3' specific dsDNA exonuclease | 1.40  |
| b1351 | racC | Isolate 1 | non-essential | Rac prophage; predicted protein                                     | 0.29  |
| b1351 | racC | Isolate 2 | non-essential | Rac prophage; predicted protein                                     | -1.98 |
| b1352 | kil  | Isolate 1 | non-essential | Rac prophage; inhibitor of ftsZ, killing protein                    | 0.75  |
| b1352 | kil  | Isolate 2 | non-essential | Rac prophage; inhibitor of ftsZ, killing protein                    | 2.58  |
| b1353 | sieB | Isolate 1 | non-essential | Rac prophage; phage superinfection exclusion protein                | -0.77 |
| b1353 | sieB | Isolate 2 | non-essential | Rac prophage; phage superinfection exclusion protein                | 0.67  |
| b1355 | ydaG | Isolate 1 | non-essential | Rac prophage; predicted protein                                     | 0.64  |
| b1355 | ydaG | Isolate 2 | non-essential | Rac prophage; predicted protein                                     | -0.37 |
| b1357 | ydaS | Isolate 1 | non-essential | Rac prophage; predicted DNA-binding transcriptional regulator       | 0.37  |
| b1357 | ydaS | Isolate 2 | non-essential | Rac prophage; predicted DNA-binding transcriptional regulator       | 1.96  |
| b1358 | ydaT | Isolate 1 | non-essential | Rac prophage; predicted protein                                     | -0.02 |
| b1358 | ydaT | Isolate 2 | non-essential | Rac prophage; predicted protein                                     | 0.23  |
| b1359 | ydaU | Isolate 1 | non-essential | Rac prophage; conserved protein                                     | 0.50  |
| b1359 | ydaU | Isolate 2 | non-essential | Rac prophage; conserved protein                                     | 0.02  |
| b1360 | ydaV | Isolate 1 | non-essential | Rac prophage; predicted DNA replication protein                     | 0.27  |
| b1360 | ydaV | Isolate 2 | non-essential | Rac prophage; predicted DNA replication protein                     | -0.31 |
| b1361 | ydaW | Isolate 1 | non-essential | Rac prophage; predicted DNA-binding protein                         | 0.48  |
| b1361 | ydaW | Isolate 2 | non-essential | Rac prophage; predicted DNA-binding protein                         | 2.41  |
| b1362 | rzpR | Isolate 1 | non-essential | Rac prophage; predicted defective peptidase                         | -1.32 |
| b1362 | rzpR | Isolate 2 | non-essential | Rac prophage; predicted defective peptidase                         | -1.12 |
| b1363 | trkG | Isolate 1 | non-essential | Rac prophage; potassium transporter subunit                         | 0.14  |
| b1363 | trkG | Isolate 2 | non-essential | Rac prophage; potassium transporter subunit                         | -0.53 |
| b1365 | ynaK | Isolate 1 | non-essential | Rac prophage; conserved protein                                     | 2.43  |
| b1365 | ynaK | Isolate 2 | non-essential | Rac prophage; conserved protein                                     | 2.22  |
| b1366 | ydaY | Isolate 1 | non-essential | Rac prophage; predicted protein                                     | 0.16  |
| b1366 | ydaY | Isolate 2 | non-essential | Rac prophage; predicted protein                                     | -0.26 |
| b1368 | ynaA | Isolate 1 | non-essential | Rac prophage; predicted tail protein                                | 1.62  |
| b1368 | ynaA | Isolate 2 | non-essential | Rac prophage; predicted tail protein                                | 0.25  |
| b1371 | lomR | Isolate 1 | *             | Rac prophage; predicted protein, C-ter fragment (pseudogene)        | -0.05 |
| b1371 | lomR | Isolate 2 | *             | Rac prophage; predicted protein, C-ter fragment (pseudogene)        | 0.07  |
| b1372 | stfR | Isolate 1 | non-essential | Rac prophage; predicted tail fiber protein                          | 1.43  |
| b1372 | stfR | Isolate 2 | non-essential | Rac prophage; predicted tail fiber protein                          | 1.01  |
| b1373 | tfaR | Isolate 1 | non-essential | Rac prophage; predicted tail fiber assembly protein                 | 1.05  |
| b1373 | tfaR | Isolate 2 | non-essential | Rac prophage; predicted tail fiber assembly protein                 | 1.32  |
| b1374 | pinR | Isolate 1 | non-essential | Rac prophage; predicted site-specific recombinase                   | -1.13 |
| b1374 | pinR | Isolate 2 | non-essential | Rac prophage; predicted site-specific recombinase                   | -0.58 |
| b1375 | ynaE | Isolate 1 | non-essential | Rac prophage; predicted DNA-binding transcriptional regulator       | 0.21  |
| b1375 | ynaE | Isolate 2 | non-essential | Rac prophage; predicted DNA-binding transcriptional regulator       | -0.63 |
| b1376 | uspF | Isolate 1 | non-essential | stress-induced protein, ATP-binding protein                         | 0.70  |
| b1376 | uspF | Isolate 2 | non-essential | stress-induced protein, ATP-binding protein                         | 0.44  |
| b1377 | ompN | Isolate 1 | non-essential | outer membrane pore protein N, non-specific                         | 1.19  |

|       |      |           |               |                                                                                        |       |
|-------|------|-----------|---------------|----------------------------------------------------------------------------------------|-------|
| b1377 | ompN | Isolate 2 | non-essential | outer membrane pore protein N, non-specific                                            | -0.62 |
| b1378 | ydbK | Isolate 1 | non-essential | fused predicted Fe-S subunit of pyruvate-flavodoxin oxidoreductase                     | 0.58  |
| b1378 | ydbK | Isolate 2 | non-essential | fused predicted Fe-S subunit of pyruvate-flavodoxin oxidoreductase                     | 0.87  |
| b1379 | hslJ | Isolate 1 | non-essential | heat-inducible protein                                                                 | 1.62  |
| b1379 | hslJ | Isolate 2 | non-essential | heat-inducible protein                                                                 | 0.98  |
| b1380 | ldhA | Isolate 1 | non-essential | fermentative D-lactate dehydrogenase, NAD-dependent                                    | 0.69  |
| b1380 | ldhA | Isolate 2 | non-essential | fermentative D-lactate dehydrogenase, NAD-dependent                                    | -0.55 |
| b1381 | ydbH | Isolate 1 | non-essential | predicted protein                                                                      | 0.27  |
| b1381 | ydbH | Isolate 2 | non-essential | predicted protein                                                                      | 0.60  |
| b1382 | ynbE | Isolate 1 | non-essential | predicted lipoprotein                                                                  | 1.57  |
| b1382 | ynbE | Isolate 2 | non-essential | predicted lipoprotein                                                                  | 1.86  |
| b1383 | ydbL | Isolate 1 | non-essential | conserved protein                                                                      | 0.33  |
| b1383 | ydbL | Isolate 2 | non-essential | conserved protein                                                                      | 1.08  |
| b1384 | feaR | Isolate 1 | non-essential | DNA-binding transcriptional regulator                                                  | -1.01 |
| b1384 | feaR | Isolate 2 | non-essential | DNA-binding transcriptional regulator                                                  | 0.41  |
| b1385 | feaB | Isolate 1 | non-essential | phenylacetaldehyde dehydrogenase                                                       | 1.43  |
| b1385 | feaB | Isolate 2 | non-essential | phenylacetaldehyde dehydrogenase                                                       | 3.20  |
| b1386 | tynA | Isolate 1 | non-essential | tyramine oxidase, copper-requiring                                                     | 1.71  |
| b1386 | tynA | Isolate 2 | non-essential | tyramine oxidase, copper-requiring                                                     | 0.64  |
| b1387 | maoC | Isolate 1 | non-essential | fused aldehyde dehydrogenase -!- enoyl-CoA hydratase                                   | 1.34  |
| b1387 | maoC | Isolate 2 | non-essential | fused aldehyde dehydrogenase -!- enoyl-CoA hydratase                                   | 0.89  |
| b1388 | paaA | Isolate 1 | non-essential | predicted multicomponent oxygenase/reductase subunit for phenylacetic acid degradation | 1.92  |
| b1388 | paaA | Isolate 2 | non-essential | predicted multicomponent oxygenase/reductase subunit for phenylacetic acid degradation | 2.65  |
| b1389 | paaB | Isolate 1 | non-essential | predicted multicomponent oxygenase/reductase subunit for phenylacetic acid degradation | 0.75  |
| b1389 | paaB | Isolate 2 | non-essential | predicted multicomponent oxygenase/reductase subunit for phenylacetic acid degradation | -0.46 |
| b1390 | paaC | Isolate 1 | non-essential | predicted multicomponent oxygenase/reductase subunit for phenylacetic acid degradation | 3.34  |
| b1390 | paaC | Isolate 2 | non-essential | predicted multicomponent oxygenase/reductase subunit for phenylacetic acid degradation | 0.77  |
| b1391 | paaD | Isolate 1 | non-essential | predicted multicomponent oxygenase/reductase subunit for phenylacetic acid degradation | 0.33  |
| b1391 | paaD | Isolate 2 | non-essential | predicted multicomponent oxygenase/reductase subunit for phenylacetic acid degradation | 0.27  |
| b1392 | paaE | Isolate 1 | non-essential | predicted multicomponent oxygenase/reductase subunit for phenylacetic acid degradation | -0.95 |
| b1392 | paaE | Isolate 2 | non-essential | predicted multicomponent oxygenase/reductase subunit for phenylacetic acid degradation | 0.03  |
| b1393 | paaF | Isolate 1 | non-essential | enoyl-CoA hydratase-isomerase                                                          | 0.96  |
| b1393 | paaF | Isolate 2 | non-essential | enoyl-CoA hydratase-isomerase                                                          | 1.45  |
| b1394 | paaG | Isolate 1 | non-essential | acyl-CoA hydratase                                                                     | 1.65  |
| b1394 | paaG | Isolate 2 | non-essential | acyl-CoA hydratase                                                                     | 0.02  |
| b1395 | paaH | Isolate 1 | non-essential | 3-hydroxybutyryl-CoA dehydrogenase                                                     | 0.89  |
| b1395 | paaH | Isolate 2 | non-essential | 3-hydroxybutyryl-CoA dehydrogenase                                                     | -0.89 |
| b1396 | paaI | Isolate 1 | non-essential | predicted thioesterase                                                                 | 0.03  |
| b1396 | paaI | Isolate 2 | non-essential | predicted thioesterase                                                                 | -0.24 |
| b1397 | paaJ | Isolate 1 | non-essential | predicted beta-ketoadipyl CoA thiolase                                                 | -0.67 |
| b1397 | paaJ | Isolate 2 | non-essential | predicted beta-ketoadipyl CoA thiolase                                                 | -1.10 |
| b1398 | paaK | Isolate 1 | non-essential | phenylacetyl-CoA ligase                                                                | -4.53 |
| b1398 | paaK | Isolate 2 | non-essential | phenylacetyl-CoA ligase                                                                | 1.70  |

|       |      |           |               |                                                                               |       |
|-------|------|-----------|---------------|-------------------------------------------------------------------------------|-------|
| b1399 | paaX | Isolate 1 | non-essential | DNA-binding transcriptional regulator, aryl-CoA responsive                    | 1.91  |
| b1399 | paaX | Isolate 2 | non-essential | DNA-binding transcriptional regulator, aryl-CoA responsive                    | 0.58  |
| b1400 | paaY | Isolate 1 | non-essential | predicted hexapeptide repeat acetyltransferase                                | -0.64 |
| b1400 | paaY | Isolate 2 | non-essential | predicted hexapeptide repeat acetyltransferase                                | 0.05  |
| b1401 | ydbA | Isolate 1 | *             | predicted outer membrane protein, N-ter fragment (pseudogene)                 | 0.22  |
| b1401 | ydbA | Isolate 2 | *             | predicted outer membrane protein, N-ter fragment (pseudogene)                 | 0.84  |
| b1405 | ydbA | Isolate 1 | *             | predicted outer membrane protein, C-ter fragment (pseudogene)                 | 1.25  |
| b1405 | ydbA | Isolate 2 | *             | predicted outer membrane protein, C-ter fragment (pseudogene)                 | 2.13  |
| b1406 | ydbC | Isolate 1 | non-essential | predicted oxidoreductase, NAD(P)-binding                                      | -0.92 |
| b1406 | ydbC | Isolate 2 | non-essential | predicted oxidoreductase, NAD(P)-binding                                      | -0.16 |
| b1407 | ydbD | Isolate 1 | non-essential | predicted protein                                                             | 0.32  |
| b1407 | ydbD | Isolate 2 | non-essential | predicted protein                                                             | -0.04 |
| b1408 | ynbA | Isolate 1 | non-essential | predicted inner membrane protein                                              | 3.51  |
| b1408 | ynbA | Isolate 2 | non-essential | predicted inner membrane protein                                              | 0.64  |
| b1409 | ynbB | Isolate 1 | non-essential | predicted CDP-diglyceride synthase                                            | -0.53 |
| b1409 | ynbB | Isolate 2 | non-essential | predicted CDP-diglyceride synthase                                            | -1.32 |
| b1410 | ynbC | Isolate 1 | non-essential | predicted hydrolase                                                           | -0.57 |
| b1410 | ynbC | Isolate 2 | non-essential | predicted hydrolase                                                           | 0.55  |
| b1411 | ynbD | Isolate 1 | non-essential | predicted phosphatase, inner membrane protein                                 | 1.16  |
| b1411 | ynbD | Isolate 2 | non-essential | predicted phosphatase, inner membrane protein                                 | -0.18 |
| b1412 | azoR | Isolate 1 | non-essential | NADH-azoreductase, FMN-dependent                                              | -1.48 |
| b1412 | azoR | Isolate 2 | non-essential | NADH-azoreductase, FMN-dependent                                              | -0.01 |
| b1413 | hrpA | Isolate 1 | non-essential | ATP-dependent helicase                                                        | 1.90  |
| b1413 | hrpA | Isolate 2 | non-essential | ATP-dependent helicase                                                        | 0.32  |
| b1414 | ydcF | Isolate 1 | non-essential | conserved protein                                                             | -1.10 |
| b1414 | ydcF | Isolate 2 | non-essential | conserved protein                                                             | -0.25 |
| b1415 | aldA | Isolate 1 | non-essential | aldehyde dehydrogenase A, NAD-linked                                          | -1.16 |
| b1415 | aldA | Isolate 2 | non-essential | aldehyde dehydrogenase A, NAD-linked                                          | 0.12  |
| b1416 | gapC | Isolate 1 | *             | glyceraldehyde-3-phosphate dehydrogenase C, N-ter fragment (pseudogene)       | 1.97  |
| b1416 | gapC | Isolate 2 | *             | glyceraldehyde-3-phosphate dehydrogenase C, N-ter fragment (pseudogene)       | 2.29  |
| b1417 | gapC | Isolate 1 | *             | glyceraldehyde-3-phosphate dehydrogenase C, C-ter fragment (pseudogene)       | -1.27 |
| b1417 | gapC | Isolate 2 | *             | glyceraldehyde-3-phosphate dehydrogenase C, C-ter fragment (pseudogene)       | -1.83 |
| b1418 | cybB | Isolate 1 | non-essential | cytochrome b561                                                               | -0.29 |
| b1418 | cybB | Isolate 2 | non-essential | cytochrome b561                                                               | -0.97 |
| b1419 | ydcA | Isolate 1 | non-essential | predicted protein                                                             | 0.64  |
| b1419 | ydcA | Isolate 2 | non-essential | predicted protein                                                             | -1.45 |
| b1421 | trg  | Isolate 1 | non-essential | methyl-accepting chemotaxis protein III, ribose and galactose sensor receptor | 0.09  |
| b1421 | trg  | Isolate 2 | non-essential | methyl-accepting chemotaxis protein III, ribose and galactose sensor receptor | 2.29  |
| b1422 | ydcI | Isolate 1 | non-essential | predicted DNA-binding transcriptional regulator                               | 1.08  |
| b1422 | ydcI | Isolate 2 | non-essential | predicted DNA-binding transcriptional regulator                               | -0.99 |
| b1423 | ydcJ | Isolate 1 | non-essential | conserved protein                                                             | 0.84  |
| b1423 | ydcJ | Isolate 2 | non-essential | conserved protein                                                             | -1.29 |
| b1424 | mdoD | Isolate 1 | non-essential | glucan biosynthesis protein, periplasmic                                      | 1.13  |

|       |      |           |               |                                                                                                          |       |
|-------|------|-----------|---------------|----------------------------------------------------------------------------------------------------------|-------|
| b1424 | mdoD | Isolate 2 | non-essential | glucan biosynthesis protein, periplasmic                                                                 | 1.29  |
| b1426 | ydcH | Isolate 1 | non-essential | predicted protein                                                                                        | 0.70  |
| b1426 | ydcH | Isolate 2 | non-essential | predicted protein                                                                                        | 0.03  |
| b1427 | rimL | Isolate 1 | non-essential | ribosomal-protein-L7/L12-serine acetyltransferase                                                        | 1.64  |
| b1427 | rimL | Isolate 2 | non-essential | ribosomal-protein-L7/L12-serine acetyltransferase                                                        | 1.69  |
| b1428 | ydcK | Isolate 1 | non-essential | predicted enzyme                                                                                         | 1.74  |
| b1428 | ydcK | Isolate 2 | non-essential | predicted enzyme                                                                                         | 0.21  |
| b1429 | tehA | Isolate 1 | non-essential | potassium-tellurite ethidium and proflavin transporter                                                   | 0.86  |
| b1429 | tehA | Isolate 2 | non-essential | potassium-tellurite ethidium and proflavin transporter                                                   | 1.15  |
| b1430 | tehB | Isolate 1 | non-essential | predicted S-adenosyl-L-methionine-dependent methyltransferase                                            | 2.64  |
| b1430 | tehB | Isolate 2 | non-essential | predicted S-adenosyl-L-methionine-dependent methyltransferase                                            | 1.13  |
| b1431 | ydcL | Isolate 1 | non-essential | predicted lipoprotein                                                                                    | 0.89  |
| b1431 | ydcL | Isolate 2 | non-essential | predicted lipoprotein                                                                                    | 1.21  |
| b1432 | ydcM | Isolate 1 | non-essential | predicted transposase                                                                                    | -1.09 |
| b1432 | ydcM | Isolate 2 | non-essential | predicted transposase                                                                                    | 0.78  |
| b1433 | ydcO | Isolate 1 | non-essential | predicted benzoate transporter                                                                           | 1.10  |
| b1433 | ydcO | Isolate 2 | non-essential | predicted benzoate transporter                                                                           | 0.62  |
| b1434 | ydcN | Isolate 1 | non-essential | predicted DNA-binding transcriptional regulator                                                          | 0.14  |
| b1434 | ydcN | Isolate 2 | non-essential | predicted DNA-binding transcriptional regulator                                                          | 0.88  |
| b1435 | ydcP | Isolate 1 | non-essential | predicted peptidase                                                                                      | -0.15 |
| b1435 | ydcP | Isolate 2 | non-essential | predicted peptidase                                                                                      | 0.94  |
| b1436 | yncJ | Isolate 1 | non-essential | predicted protein                                                                                        | 1.03  |
| b1436 | yncJ | Isolate 2 | non-essential | predicted protein                                                                                        | -0.10 |
| b1438 | ydcQ | Isolate 1 | non-essential | predicted DNA-binding transcriptional regulator                                                          | 0.51  |
| b1438 | ydcQ | Isolate 2 | non-essential | predicted DNA-binding transcriptional regulator                                                          | -0.03 |
| b1439 | ydcR | Isolate 1 | non-essential | fused predicted DNA-binding transcriptional regulator -!- predicted amino transferase                    | -0.43 |
| b1439 | ydcR | Isolate 2 | non-essential | fused predicted DNA-binding transcriptional regulator -!- predicted amino transferase                    | -0.73 |
| b1440 | ydcS | Isolate 1 | non-essential | predicted spermidine/putrescine transporter subunit -!- periplasmic-binding component of ABC superfamily | 1.56  |
| b1440 | ydcS | Isolate 2 | non-essential | predicted spermidine/putrescine transporter subunit -!- periplasmic-binding component of ABC superfamily | 0.48  |
| b1441 | ydcT | Isolate 1 | non-essential | predicted spermidine/putrescine transporter subunit -!- ATP-binding component of ABC superfamily         | 1.05  |
| b1441 | ydcT | Isolate 2 | non-essential | predicted spermidine/putrescine transporter subunit -!- ATP-binding component of ABC superfamily         | 0.98  |
| b1442 | ydcU | Isolate 1 | non-essential | predicted spermidine/putrescine transporter subunit -!- membrane component of ABC superfamily            | -2.13 |
| b1442 | ydcU | Isolate 2 | non-essential | predicted spermidine/putrescine transporter subunit -!- membrane component of ABC superfamily            | -0.84 |
| b1443 | ydcV | Isolate 1 | non-essential | predicted spermidine/putrescine transporter subunit -!- membrane component of ABC superfamily            | -0.21 |
| b1443 | ydcV | Isolate 2 | non-essential | predicted spermidine/putrescine transporter subunit -!- membrane component of ABC superfamily            | 1.01  |
| b1444 | ydcW | Isolate 1 | non-essential | medium chain aldehyde dehydrogenase                                                                      | 1.38  |
| b1444 | ydcW | Isolate 2 | non-essential | medium chain aldehyde dehydrogenase                                                                      | 0.35  |
| b1445 | ydcX | Isolate 1 | non-essential | predicted inner membrane protein                                                                         | -0.67 |
| b1445 | ydcX | Isolate 2 | non-essential | predicted inner membrane protein                                                                         | -0.70 |
| b1446 | ydcY | Isolate 1 | non-essential | predicted protein                                                                                        | 2.77  |
| b1446 | ydcY | Isolate 2 | non-essential | predicted protein                                                                                        | -1.63 |
| b1447 | ydcZ | Isolate 1 | non-essential | predicted inner membrane protein                                                                         | 1.21  |
| b1447 | ydcZ | Isolate 2 | non-essential | predicted inner membrane protein                                                                         | -0.58 |

|       |      |           |               |                                                                  |       |
|-------|------|-----------|---------------|------------------------------------------------------------------|-------|
| b1448 | yncA | Isolate 1 | non-essential | predicted acyltransferase with acyl-CoA N-acyltransferase domain | -0.23 |
| b1448 | yncA | Isolate 2 | non-essential | predicted acyltransferase with acyl-CoA N-acyltransferase domain | 2.32  |
| b1449 | yncB | Isolate 1 | non-essential | predicted oxidoreductase, Zn-dependent and NAD(P)-binding        | 1.20  |
| b1449 | yncB | Isolate 2 | non-essential | predicted oxidoreductase, Zn-dependent and NAD(P)-binding        | 1.34  |
| b1450 | yncC | Isolate 1 | non-essential | predicted DNA-binding transcriptional regulator                  | -0.27 |
| b1450 | yncC | Isolate 2 | non-essential | predicted DNA-binding transcriptional regulator                  | -2.45 |
| b1451 | yncD | Isolate 1 | non-essential | predicted iron outer membrane transporter                        | -1.52 |
| b1451 | yncD | Isolate 2 | non-essential | predicted iron outer membrane transporter                        | 0.62  |
| b1452 | yncE | Isolate 1 | non-essential | conserved protein                                                | -0.01 |
| b1452 | yncE | Isolate 2 | non-essential | conserved protein                                                | 0.78  |
| b1453 | ansP | Isolate 1 | non-essential | L-asparagine transporter                                         | -1.26 |
| b1453 | ansP | Isolate 2 | non-essential | L-asparagine transporter                                         | -0.30 |
| b1454 | yncG | Isolate 1 | non-essential | predicted enzyme                                                 | -0.14 |
| b1454 | yncG | Isolate 2 | non-essential | predicted enzyme                                                 | 0.26  |
| b1455 | yncH | Isolate 1 | non-essential | predicted protein                                                | -0.17 |
| b1455 | yncH | Isolate 2 | non-essential | predicted protein                                                | 0.75  |
| b1456 | rhsE | Isolate 1 | non-essential | rhsE element core protein RshE                                   | -0.01 |
| b1456 | rhsE | Isolate 2 | non-essential | rhsE element core protein RshE                                   | -0.29 |
| b1457 | ydcD | Isolate 1 | non-essential | predicted protein                                                | 1.48  |
| b1457 | ydcD | Isolate 2 | non-essential | predicted protein                                                | 0.96  |
| b1458 | yncI | Isolate 1 | non-essential | predicted protein                                                | 1.15  |
| b1458 | yncI | Isolate 2 | non-essential | predicted protein                                                | 2.45  |
| b1459 | yncM | Isolate 1 | non-essential | predicted protein                                                | 0.02  |
| b1459 | yncM | Isolate 2 | non-essential | predicted protein                                                | 0.83  |
| b1460 | ydcC | Isolate 1 | non-essential | conserved protein                                                | -0.70 |
| b1460 | ydcC | Isolate 2 | non-essential | conserved protein                                                | 1.16  |
| b1461 | ydcE | Isolate 1 | non-essential | 4-oxalocrotonate tautomerase                                     | 7.44  |
| b1461 | ydcE | Isolate 2 | non-essential | 4-oxalocrotonate tautomerase                                     | 0.41  |
| b1462 | yddH | Isolate 1 | non-essential | conserved protein                                                | -0.45 |
| b1462 | yddH | Isolate 2 | non-essential | conserved protein                                                | 0.11  |
| b1463 | nhoA | Isolate 1 | non-essential | N-hydroxyarylamine O-acetyltransferase                           | 4.61  |
| b1463 | nhoA | Isolate 2 | non-essential | N-hydroxyarylamine O-acetyltransferase                           | 0.37  |
| b1464 | yddE | Isolate 1 | non-essential | conserved protein                                                | 0.49  |
| b1464 | yddE | Isolate 2 | non-essential | conserved protein                                                | 1.17  |
| b1465 | narV | Isolate 1 | non-essential | nitrate reductase 2 (NRZ), gamma subunit                         | 0.36  |
| b1465 | narV | Isolate 2 | non-essential | nitrate reductase 2 (NRZ), gamma subunit                         | 0.58  |
| b1466 | narW | Isolate 1 | non-essential | nitrate reductase 2 (NRZ), delta subunit (assembly subunit)      | 0.86  |
| b1466 | narW | Isolate 2 | non-essential | nitrate reductase 2 (NRZ), delta subunit (assembly subunit)      | 1.76  |
| b1467 | narY | Isolate 1 | non-essential | nitrate reductase 2 (NRZ), beta subunit                          | 0.98  |
| b1467 | narY | Isolate 2 | non-essential | nitrate reductase 2 (NRZ), beta subunit                          | 0.81  |
| b1468 | narZ | Isolate 1 | non-essential | nitrate reductase 2 (NRZ), alpha subunit                         | -2.09 |
| b1468 | narZ | Isolate 2 | non-essential | nitrate reductase 2 (NRZ), alpha subunit                         | 1.15  |
| b1469 | narU | Isolate 1 | non-essential | nitrate/nitrite transporter                                      | -1.89 |

|       |      |           |               |                                                                                      |       |
|-------|------|-----------|---------------|--------------------------------------------------------------------------------------|-------|
| b1469 | narU | Isolate 2 | non-essential | nitrate/nitrite transporter                                                          | -0.23 |
| b1470 | yddJ | Isolate 1 | non-essential | predicted protein                                                                    | -0.94 |
| b1470 | yddJ | Isolate 2 | non-essential | predicted protein                                                                    | -2.19 |
| b1471 | yddK | Isolate 1 | non-essential | predicted protein                                                                    | 0.43  |
| b1471 | yddK | Isolate 2 | non-essential | predicted protein                                                                    | 0.58  |
| b1472 | yddL | Isolate 1 | non-essential | predicted lipoprotein                                                                | 1.24  |
| b1472 | yddL | Isolate 2 | non-essential | predicted lipoprotein                                                                | -0.33 |
| b1473 | yddG | Isolate 1 | non-essential | predicted methyl viologen efflux pump                                                | -0.85 |
| b1473 | yddG | Isolate 2 | non-essential | predicted methyl viologen efflux pump                                                | 1.15  |
| b1474 | fdnG | Isolate 1 | non-essential | formate dehydrogenase-N, alpha subunit, nitrate-inducible                            | -0.35 |
| b1474 | fdnG | Isolate 2 | non-essential | formate dehydrogenase-N, alpha subunit, nitrate-inducible                            | 1.45  |
| b1475 | fdnH | Isolate 1 | non-essential | formate dehydrogenase-N, Fe-S (beta) subunit, nitrate-inducible                      | -0.17 |
| b1475 | fdnH | Isolate 2 | non-essential | formate dehydrogenase-N, Fe-S (beta) subunit, nitrate-inducible                      | -0.54 |
| b1476 | fdnI | Isolate 1 | non-essential | formate dehydrogenase-N, cytochrome B556 (gamma) subunit, nitrate-inducible          | -0.40 |
| b1476 | fdnI | Isolate 2 | non-essential | formate dehydrogenase-N, cytochrome B556 (gamma) subunit, nitrate-inducible          | -2.77 |
| b1477 | yddM | Isolate 1 | non-essential | predicted DNA-binding transcriptional regulator                                      | -2.00 |
| b1477 | yddM | Isolate 2 | non-essential | predicted DNA-binding transcriptional regulator                                      | 0.52  |
| b1478 | adhP | Isolate 1 | non-essential | alcohol dehydrogenase, 1-propanol preferring                                         | 0.95  |
| b1478 | adhP | Isolate 2 | non-essential | alcohol dehydrogenase, 1-propanol preferring                                         | 2.45  |
| b1479 | sfcA | Isolate 1 | non-essential | malate dehydrogenase, NAD-requiring (malic enzyme)                                   | 0.26  |
| b1479 | sfcA | Isolate 2 | non-essential | malate dehydrogenase, NAD-requiring (malic enzyme)                                   | 0.49  |
| b1480 | sra  | Isolate 1 | non-essential | 30S ribosomal subunit protein S22                                                    | 0.98  |
| b1481 | bdm  | Isolate 1 | non-essential | biofilm-dependent modulation protein                                                 | -0.06 |
| b1481 | bdm  | Isolate 2 | non-essential | biofilm-dependent modulation protein                                                 | -0.30 |
| b1482 | osmC | Isolate 1 | non-essential | osmotically inducible, stress-inducible membrane protein                             | 0.77  |
| b1482 | osmC | Isolate 2 | non-essential | osmotically inducible, stress-inducible membrane protein                             | -1.41 |
| b1483 | ddpF | Isolate 1 | non-essential | D-Ala-D-Ala transporter subunit -!- ATP-binding component of ABC superfamily         | 0.67  |
| b1483 | ddpF | Isolate 2 | non-essential | D-Ala-D-Ala transporter subunit -!- ATP-binding component of ABC superfamily         | -0.49 |
| b1484 | ddpD | Isolate 1 | non-essential | D-Ala-D-Ala transporter subunit -!- ATP-binding component of ABC superfamily         | 0.54  |
| b1484 | ddpD | Isolate 2 | non-essential | D-Ala-D-Ala transporter subunit -!- ATP-binding component of ABC superfamily         | -0.79 |
| b1485 | ddpC | Isolate 1 | non-essential | D-Ala-D-Ala transporter subunit -!- membrane component of ABC superfamily            | -0.62 |
| b1485 | ddpC | Isolate 2 | non-essential | D-Ala-D-Ala transporter subunit -!- membrane component of ABC superfamily            | 1.36  |
| b1486 | ddpB | Isolate 1 | non-essential | D-Ala-D-Ala transporter subunit -!- membrane component of ABC superfamily            | 0.62  |
| b1486 | ddpB | Isolate 2 | non-essential | D-Ala-D-Ala transporter subunit -!- membrane component of ABC superfamily            | 0.67  |
| b1487 | ddpA | Isolate 1 | non-essential | D-Ala-D-Ala transporter subunit -!- periplasmic-binding component of ABC superfamily | -0.69 |
| b1487 | ddpA | Isolate 2 | non-essential | D-Ala-D-Ala transporter subunit -!- periplasmic-binding component of ABC superfamily | -0.86 |
| b1488 | ddpX | Isolate 1 | non-essential | D-Ala-D-Ala dipeptidase, Zn-dependent                                                | -0.17 |
| b1488 | ddpX | Isolate 2 | non-essential | D-Ala-D-Ala dipeptidase, Zn-dependent                                                | 1.81  |
| b1489 | dos  | Isolate 1 | non-essential | cAMP phosphodiesterase, heme-regulated                                               | 0.88  |
| b1489 | dos  | Isolate 2 | non-essential | cAMP phosphodiesterase, heme-regulated                                               | 2.08  |
| b1490 | yddV | Isolate 1 | non-essential | predicted diguanylate cyclase                                                        | 1.20  |
| b1490 | yddV | Isolate 2 | non-essential | predicted diguanylate cyclase                                                        | 0.29  |
| b1491 | yddW | Isolate 1 | non-essential | predicted liprotein                                                                  | -0.99 |

|       |      |           |               |                                                                                                                    |       |
|-------|------|-----------|---------------|--------------------------------------------------------------------------------------------------------------------|-------|
| b1491 | yddW | Isolate 2 | non-essential | predicted lipoprotein                                                                                              | 2.20  |
| b1492 | gadC | Isolate 1 | non-essential | predicted glutamate:gamma-aminobutyric acid antiporter                                                             | 1.82  |
| b1492 | gadC | Isolate 2 | non-essential | predicted glutamate:gamma-aminobutyric acid antiporter                                                             | 2.56  |
| b1493 | gadB | Isolate 1 | non-essential | glutamate decarboxylase B, PLP-dependent                                                                           | 1.38  |
| b1493 | gadB | Isolate 2 | non-essential | glutamate decarboxylase B, PLP-dependent                                                                           | -0.69 |
| b1494 | pqqL | Isolate 1 | non-essential | predicted peptidase                                                                                                | 0.03  |
| b1494 | pqqL | Isolate 2 | non-essential | predicted peptidase                                                                                                | 0.67  |
| b1495 | yddB | Isolate 1 | non-essential | predicted porin protein                                                                                            | 0.80  |
| b1495 | yddB | Isolate 2 | non-essential | predicted porin protein                                                                                            | -0.42 |
| b1496 | yddA | Isolate 1 | non-essential | fused predicted multidrug transporter subunits -!- membrane component and ATP-binding component of ABC superfamily | -0.35 |
| b1496 | yddA | Isolate 2 | non-essential | fused predicted multidrug transporter subunits -!- membrane component and ATP-binding component of ABC superfamily | 2.44  |
| b1497 | ydeM | Isolate 1 | non-essential | conserved protein                                                                                                  | 0.68  |
| b1497 | ydeM | Isolate 2 | non-essential | conserved protein                                                                                                  | 1.70  |
| b1498 | ydeN | Isolate 1 | non-essential | conserved protein                                                                                                  | -0.66 |
| b1498 | ydeN | Isolate 2 | non-essential | conserved protein                                                                                                  | -0.80 |
| b1499 | ydeO | Isolate 1 | non-essential | predicted DNA-binding transcriptional activator                                                                    | 0.59  |
| b1499 | ydeO | Isolate 2 | non-essential | predicted DNA-binding transcriptional activator                                                                    | -0.06 |
| b1501 | ydeP | Isolate 1 | non-essential | predicted oxidoreductase                                                                                           | -0.08 |
| b1501 | ydeP | Isolate 2 | non-essential | predicted oxidoreductase                                                                                           | -0.39 |
| b1502 | ydeQ | Isolate 1 | non-essential | predicted fimbrial-like adhesin protein                                                                            | 1.21  |
| b1502 | ydeQ | Isolate 2 | non-essential | predicted fimbrial-like adhesin protein                                                                            | 0.80  |
| b1503 | ydeR | Isolate 1 | non-essential | predicted fimbrial-like adhesin protein                                                                            | 1.12  |
| b1503 | ydeR | Isolate 2 | non-essential | predicted fimbrial-like adhesin protein                                                                            | 1.57  |
| b1504 | ydeS | Isolate 1 | non-essential | predicted fimbrial-like adhesin protein                                                                            | -0.20 |
| b1504 | ydeS | Isolate 2 | non-essential | predicted fimbrial-like adhesin protein                                                                            | 1.50  |
| b1505 | ydeT | Isolate 1 | non-essential | predicted protein                                                                                                  | -1.97 |
| b1505 | ydeT | Isolate 2 | non-essential | predicted protein                                                                                                  | -1.62 |
| b1506 | yneL | Isolate 1 | non-essential | predicted transcriptional regulator                                                                                | 1.40  |
| b1506 | yneL | Isolate 2 | non-essential | predicted transcriptional regulator                                                                                | 0.62  |
| b1507 | hipA | Isolate 1 | non-essential | regulator with hipB                                                                                                | -2.09 |
| b1507 | hipA | Isolate 2 | non-essential | regulator with hipB                                                                                                | -0.89 |
| b1508 | hipB | Isolate 1 | non-essential | DNA-binding transcriptional regulator                                                                              | -0.65 |
| b1508 | hipB | Isolate 2 | non-essential | DNA-binding transcriptional regulator                                                                              | 0.05  |
| b1509 | ydeU | Isolate 1 | *             | conserved protein, predicted pseudogene                                                                            | -0.58 |
| b1509 | ydeU | Isolate 2 | *             | conserved protein, predicted pseudogene                                                                            | -1.24 |
| b1510 | ydeK | Isolate 1 | non-essential | predicted lipoprotein                                                                                              | -0.57 |
| b1510 | ydeK | Isolate 2 | non-essential | predicted lipoprotein                                                                                              | 1.02  |
| b1511 | ydeV | Isolate 1 | non-essential | predicted sugar kinase                                                                                             | 0.78  |
| b1511 | ydeV | Isolate 2 | non-essential | predicted sugar kinase                                                                                             | 0.32  |
| b1512 | ydeW | Isolate 1 | non-essential | predicted DNA-binding transcriptional regulator                                                                    | -1.25 |
| b1512 | ydeW | Isolate 2 | non-essential | predicted DNA-binding transcriptional regulator                                                                    | 1.29  |
| b1513 | ego  | Isolate 1 | non-essential | fused AI2 transporter subunits -!- ATP-binding components of ABC superfamily                                       | 0.63  |
| b1513 | ego  | Isolate 2 | non-essential | fused AI2 transporter subunits -!- ATP-binding components of ABC superfamily                                       | -1.38 |

|         |      |           |               |                                                                      |       |
|---------|------|-----------|---------------|----------------------------------------------------------------------|-------|
| b1514   | lsrC | Isolate 1 | non-essential | AI2 transporter -!- membrane component of ABC superfamily            | -1.19 |
| b1514   | lsrC | Isolate 2 | non-essential | AI2 transporter -!- membrane component of ABC superfamily            | -0.37 |
| b1515   | lsrD | Isolate 1 | non-essential | AI2 transporter -!- membrane component of ABC superfamily            | 1.50  |
| b1515.1 | *    | Isolate 1 | *             | *                                                                    | 1.13  |
| b1516   | lsrB | Isolate 1 | non-essential | AI2 transporter -!- periplasmic-binding component of ABC superfamily | -0.58 |
| b1516   | lsrB | Isolate 2 | non-essential | AI2 transporter -!- periplasmic-binding component of ABC superfamily | -0.13 |
| b1517   | lsrF | Isolate 1 | non-essential | predicted aldolase                                                   | 0.08  |
| b1517   | lsrF | Isolate 2 | non-essential | predicted aldolase                                                   | -0.57 |
| b1518   | lsrG | Isolate 1 | non-essential | conserved protein                                                    | -1.32 |
| b1518   | lsrG | Isolate 2 | non-essential | conserved protein                                                    | 0.57  |
| b1519   | tam  | Isolate 1 | non-essential | trans-aconitate methyltransferase                                    | -1.98 |
| b1519   | tam  | Isolate 2 | non-essential | trans-aconitate methyltransferase                                    | 0.32  |
| b1520   | yneE | Isolate 1 | non-essential | conserved inner membrane protein                                     | -0.29 |
| b1520   | yneE | Isolate 2 | non-essential | conserved inner membrane protein                                     | -0.82 |
| b1521   | uxaB | Isolate 1 | non-essential | altronate oxidoreductase, NAD-dependent                              | -1.66 |
| b1521   | uxaB | Isolate 2 | non-essential | altronate oxidoreductase, NAD-dependent                              | -0.92 |
| b1522   | yneF | Isolate 1 | non-essential | predicted diguanylate cyclase                                        | -2.23 |
| b1522   | yneF | Isolate 2 | non-essential | predicted diguanylate cyclase                                        | -2.09 |
| b1523   | yneG | Isolate 1 | non-essential | conserved protein                                                    | -0.58 |
| b1523   | yneG | Isolate 2 | non-essential | conserved protein                                                    | 2.29  |
| b1524   | yneH | Isolate 1 | non-essential | predicted glutaminase                                                | -0.31 |
| b1524   | yneH | Isolate 2 | non-essential | predicted glutaminase                                                | -0.45 |
| b1525   | yneI | Isolate 1 | non-essential | predicted aldehyde dehydrogenase                                     | 1.09  |
| b1525   | yneI | Isolate 2 | non-essential | predicted aldehyde dehydrogenase                                     | -1.12 |
| b1526   | yneJ | Isolate 1 | non-essential | predicted DNA-binding transcriptional regulator                      | -0.65 |
| b1526   | yneJ | Isolate 2 | non-essential | predicted DNA-binding transcriptional regulator                      | -1.27 |
| b1527   | yneK | Isolate 1 | non-essential | predicted protein                                                    | -1.37 |
| b1527   | yneK | Isolate 2 | non-essential | predicted protein                                                    | -1.56 |
| b1528   | ydeA | Isolate 1 | non-essential | predicted arabinose transporter                                      | 0.84  |
| b1528   | ydeA | Isolate 2 | non-essential | predicted arabinose transporter                                      | 0.00  |
| b1529   | marC | Isolate 1 | non-essential | predicted transporter                                                | -2.55 |
| b1529   | marC | Isolate 2 | non-essential | predicted transporter                                                | 0.68  |
| b1530   | marR | Isolate 1 | non-essential | DNA-binding transcriptional repressor                                | -0.87 |
| b1530   | marR | Isolate 2 | non-essential | DNA-binding transcriptional repressor                                | -0.47 |
| b1531   | marA | Isolate 1 | non-essential | DNA-binding transcriptional dual regulator                           | 0.59  |
| b1531   | marA | Isolate 2 | non-essential | DNA-binding transcriptional dual regulator                           | 0.81  |
| b1532   | marB | Isolate 1 | non-essential | predicted protein                                                    | 2.01  |
| b1532   | marB | Isolate 2 | non-essential | predicted protein                                                    | 1.98  |
| b1533   | eamA | Isolate 1 | non-essential | cysteine and O-acetyl-L-serine efflux system                         | -2.40 |
| b1533   | eamA | Isolate 2 | non-essential | cysteine and O-acetyl-L-serine efflux system                         | -0.45 |
| b1534   | ydeE | Isolate 1 | non-essential | predicted transporter                                                | 0.12  |
| b1534   | ydeE | Isolate 2 | non-essential | predicted transporter                                                | -0.01 |
| b1535   | ydeH | Isolate 1 | non-essential | conserved protein                                                    | 0.58  |



|       |      |           |               |                                                          |       |
|-------|------|-----------|---------------|----------------------------------------------------------|-------|
| b1535 | ydeH | Isolate 2 | non-essential | conserved protein                                        | 0.01  |
| b1536 | ydeI | Isolate 1 | non-essential | conserved protein                                        | 1.44  |
| b1536 | ydeI | Isolate 2 | non-essential | conserved protein                                        | -0.05 |
| b1537 | ydeJ | Isolate 1 | non-essential | conserved protein                                        | -1.72 |
| b1537 | ydeJ | Isolate 2 | non-essential | conserved protein                                        | -0.53 |
| b1538 | dcp  | Isolate 1 | non-essential | dipeptidyl carboxypeptidase II                           | -0.87 |
| b1538 | dcp  | Isolate 2 | non-essential | dipeptidyl carboxypeptidase II                           | 0.46  |
| b1539 | ydfG | Isolate 1 | non-essential | L-allo-threonine dehydrogenase, NAD(P)-binding           | -2.99 |
| b1539 | ydfG | Isolate 2 | non-essential | L-allo-threonine dehydrogenase, NAD(P)-binding           | -1.38 |
| b1540 | ydfH | Isolate 1 | non-essential | predicted DNA-binding transcriptional regulator          | -0.81 |
| b1540 | ydfH | Isolate 2 | non-essential | predicted DNA-binding transcriptional regulator          | 0.92  |
| b1541 | ydfZ | Isolate 1 | non-essential | conserved protein                                        | -1.58 |
| b1541 | ydfZ | Isolate 2 | non-essential | conserved protein                                        | -0.74 |
| b1542 | ydfI | Isolate 1 | non-essential | predicted mannonate dehydrogenase                        | 1.24  |
| b1542 | ydfI | Isolate 2 | non-essential | predicted mannonate dehydrogenase                        | -0.72 |
| b1543 | ydfJ | Isolate 1 | non-essential | predicted transporter                                    | -0.32 |
| b1543 | ydfJ | Isolate 2 | non-essential | predicted transporter                                    | -0.04 |
| b1545 | pinQ | Isolate 1 | non-essential | Qin prophage; predicted site-specific recombinase        | 0.13  |
| b1545 | pinQ | Isolate 2 | non-essential | Qin prophage; predicted site-specific recombinase        | 1.96  |
| b1546 | tfaQ | Isolate 1 | non-essential | Qin prophage; predicted tail fibre assembly protein      | 0.59  |
| b1546 | tfaQ | Isolate 2 | non-essential | Qin prophage; predicted tail fibre assembly protein      | 1.79  |
| b1547 | stfQ | Isolate 1 | non-essential | Qin prophage; predicted side tail fibre assembly protein | 1.39  |
| b1547 | stfQ | Isolate 2 | non-essential | Qin prophage; predicted side tail fibre assembly protein | 1.62  |
| b1548 | nohA | Isolate 1 | non-essential | Qin prophage; predicted packaging protein                | -0.28 |
| b1548 | nohA | Isolate 2 | non-essential | Qin prophage; predicted packaging protein                | 1.35  |
| b1549 | ydfO | Isolate 1 | non-essential | Qin prophage; predicted protein                          | 1.02  |
| b1549 | ydfO | Isolate 2 | non-essential | Qin prophage; predicted protein                          | -2.91 |
| b1550 | gnsB | Isolate 1 | non-essential | Qin prophage; predicted protein                          | -0.12 |
| b1550 | gnsB | Isolate 2 | non-essential | Qin prophage; predicted protein                          | -1.68 |
| b1551 | ynfN | Isolate 1 | non-essential | Qin prophage; predicted protein                          | 1.25  |
| b1551 | ynfN | Isolate 2 | non-essential | Qin prophage; predicted protein                          | -0.34 |
| b1552 | cspI | Isolate 1 | non-essential | Qin prophage; cold shock protein                         | 0.80  |
| b1552 | cspI | Isolate 2 | non-essential | Qin prophage; cold shock protein                         | -0.13 |
| b1553 | ydfP | Isolate 1 | non-essential | Qin prophage; conserved protein                          | 1.21  |
| b1553 | ydfP | Isolate 2 | non-essential | Qin prophage; conserved protein                          | 1.52  |
| b1554 | ydfQ | Isolate 1 | non-essential | Qin prophage; predicted lysozyme                         | -0.16 |
| b1554 | ydfQ | Isolate 2 | non-essential | Qin prophage; predicted lysozyme                         | -0.25 |
| b1555 | ydfR | Isolate 1 | non-essential | Qin prophage; predicted protein                          | -2.02 |
| b1555 | ydfR | Isolate 2 | non-essential | Qin prophage; predicted protein                          | -0.95 |
| b1556 | essQ | Isolate 1 | non-essential | Qin prophage; predicted S lysis protein                  | 0.43  |
| b1556 | essQ | Isolate 2 | non-essential | Qin prophage; predicted S lysis protein                  | 1.67  |
| b1557 | cspB | Isolate 1 | non-essential | Qin prophage; cold shock protein                         | 1.13  |
| b1557 | cspB | Isolate 2 | non-essential | Qin prophage; cold shock protein                         | 0.60  |

|       |      |           |               |                                                                                                            |       |
|-------|------|-----------|---------------|------------------------------------------------------------------------------------------------------------|-------|
| b1558 | cspF | Isolate 1 | non-essential | Qin prophage; cold shock protein                                                                           | 1.26  |
| b1558 | cspF | Isolate 2 | non-essential | Qin prophage; cold shock protein                                                                           | 3.22  |
| b1559 | ydfT | Isolate 1 | non-essential | Qin prophage; predicted antitermination protein Q                                                          | -0.12 |
| b1559 | ydfT | Isolate 2 | non-essential | Qin prophage; predicted antitermination protein Q                                                          | -0.46 |
| b1560 | ydfU | Isolate 1 | non-essential | Qin prophage; predicted protein                                                                            | -0.72 |
| b1560 | ydfU | Isolate 2 | non-essential | Qin prophage; predicted protein                                                                            | 0.26  |
| b1561 | rem  | Isolate 1 | non-essential | Qin prophage; predicted protein                                                                            | -0.52 |
| b1561 | rem  | Isolate 2 | non-essential | Qin prophage; predicted protein                                                                            | -1.18 |
| b1562 | hokD | Isolate 1 | non-essential | Qin prophage; small toxic polypeptide                                                                      | -0.98 |
| b1562 | hokD | Isolate 2 | non-essential | Qin prophage; small toxic polypeptide                                                                      | -0.23 |
| b1563 | relE | Isolate 1 | non-essential | Qin prophage; toxin of the RelE-RelB toxin-antitoxin system                                                | -1.53 |
| b1563 | relE | Isolate 2 | non-essential | Qin prophage; toxin of the RelE-RelB toxin-antitoxin system                                                | -0.16 |
| b1564 | relB | Isolate 1 | non-essential | Qin prophage; bifunctional antitoxin of the RelE-RelB toxin-antitoxin system -!- transcriptional repressor | -1.29 |
| b1564 | relB | Isolate 2 | non-essential | Qin prophage; bifunctional antitoxin of the RelE-RelB toxin-antitoxin system -!- transcriptional repressor | -0.07 |
| b1565 | ydfV | Isolate 1 | non-essential | Qin prophage; predicted protein                                                                            | -0.95 |
| b1565 | ydfV | Isolate 2 | non-essential | Qin prophage; predicted protein                                                                            | -0.83 |
| b1566 | flxA | Isolate 1 | non-essential | Qin prophage; predicted protein                                                                            | 0.14  |
| b1566 | flxA | Isolate 2 | non-essential | Qin prophage; predicted protein                                                                            | 0.82  |
| b1567 | ydfW | Isolate 1 | non-essential | Qin prophage; predicted protein                                                                            | -1.09 |
| b1567 | ydfW | Isolate 2 | non-essential | Qin prophage; predicted protein                                                                            | -0.30 |
| b1568 | ydfX | Isolate 1 | non-essential | Qin prophage; predicted protein                                                                            | 0.38  |
| b1568 | ydfX | Isolate 2 | non-essential | Qin prophage; predicted protein                                                                            | -0.81 |
| b1569 | dicC | Isolate 1 | non-essential | Qin prophage; DNA-binding transcriptional regulator                                                        | -3.75 |
| b1569 | dicC | Isolate 2 | non-essential | Qin prophage; DNA-binding transcriptional regulator                                                        | -1.59 |
| b1571 | ydfA | Isolate 1 | non-essential | Qin prophage; predicted protein                                                                            | -1.18 |
| b1571 | ydfA | Isolate 2 | non-essential | Qin prophage; predicted protein                                                                            | 1.03  |
| b1573 | ydfC | Isolate 1 | non-essential | Qin prophage; predicted protein                                                                            | -1.30 |
| b1573 | ydfC | Isolate 2 | non-essential | Qin prophage; predicted protein                                                                            | 0.06  |
| b1575 | dicB | Isolate 1 | non-essential | Qin prophage; cell division inhibition protein                                                             | -1.64 |
| b1575 | dicB | Isolate 2 | non-essential | Qin prophage; cell division inhibition protein                                                             | -0.95 |
| b1576 | ydfD | Isolate 1 | non-essential | Qin prophage; predicted protein                                                                            | -1.00 |
| b1576 | ydfD | Isolate 2 | non-essential | Qin prophage; predicted protein                                                                            | -0.94 |
| b1577 | ydfE | Isolate 1 | non-essential | Qin prophage; predicted protein                                                                            | -0.21 |
| b1577 | ydfE | Isolate 2 | non-essential | Qin prophage; predicted protein                                                                            | -2.10 |
| b1579 | intQ | Isolate 1 | non-essential | Qin prophage; predicted defective integrase                                                                | -1.91 |
| b1579 | intQ | Isolate 2 | non-essential | Qin prophage; predicted defective integrase                                                                | 0.91  |
| b1580 | rspB | Isolate 1 | non-essential | predicted oxidoreductase, Zn-dependent and NAD(P)-binding                                                  | 0.61  |
| b1580 | rspB | Isolate 2 | non-essential | predicted oxidoreductase, Zn-dependent and NAD(P)-binding                                                  | 1.37  |
| b1581 | rspA | Isolate 1 | non-essential | predicted dehydratase                                                                                      | 1.67  |
| b1581 | rspA | Isolate 2 | non-essential | predicted dehydratase                                                                                      | 1.05  |
| b1582 | ynfA | Isolate 1 | non-essential | conserved inner membrane protein                                                                           | -1.51 |
| b1582 | ynfA | Isolate 2 | non-essential | conserved inner membrane protein                                                                           | -1.31 |
| b1583 | ynfB | Isolate 1 | non-essential | predicted protein                                                                                          | 0.59  |

|       |      |           |               |                                                        |       |
|-------|------|-----------|---------------|--------------------------------------------------------|-------|
| b1583 | ynfB | Isolate 2 | non-essential | predicted protein                                      | -0.19 |
| b1584 | speG | Isolate 1 | non-essential | spermidine N1-acetyltransferase                        | 0.71  |
| b1584 | speG | Isolate 2 | non-essential | spermidine N1-acetyltransferase                        | 1.85  |
| b1585 | ynfC | Isolate 1 | non-essential | predicted protein                                      | -0.58 |
| b1585 | ynfC | Isolate 2 | non-essential | predicted protein                                      | -0.10 |
| b1586 | ynfD | Isolate 1 | non-essential | predicted protein                                      | 0.64  |
| b1586 | ynfD | Isolate 2 | non-essential | predicted protein                                      | 0.49  |
| b1587 | ynfE | Isolate 1 | non-essential | oxidoreductase subunit                                 | 2.22  |
| b1587 | ynfE | Isolate 2 | non-essential | oxidoreductase subunit                                 | -0.09 |
| b1588 | ynfF | Isolate 1 | non-essential | oxidoreductase subunit                                 | -2.46 |
| b1588 | ynfF | Isolate 2 | non-essential | oxidoreductase subunit                                 | -0.88 |
| b1589 | ynfG | Isolate 1 | non-essential | oxidoreductase, Fe-S subunit                           | -0.34 |
| b1589 | ynfG | Isolate 2 | non-essential | oxidoreductase, Fe-S subunit                           | -2.62 |
| b1590 | ynfH | Isolate 1 | non-essential | oxidoreductase, membrane subunit                       | 0.90  |
| b1590 | ynfH | Isolate 2 | non-essential | oxidoreductase, membrane subunit                       | 1.14  |
| b1591 | dmsD | Isolate 1 | non-essential | twin-arginine leader-binding protein for DmsA and TorA | -1.88 |
| b1591 | dmsD | Isolate 2 | non-essential | twin-arginine leader-binding protein for DmsA and TorA | -1.42 |
| b1592 | clcB | Isolate 1 | non-essential | predicted voltage-gated chloride channel               | -1.47 |
| b1592 | clcB | Isolate 2 | non-essential | predicted voltage-gated chloride channel               | -0.50 |
| b1593 | ynfK | Isolate 1 | non-essential | predicted dethiobiotin synthetase                      | -0.96 |
| b1593 | ynfK | Isolate 2 | non-essential | predicted dethiobiotin synthetase                      | 0.05  |
| b1594 | dgsA | Isolate 1 | non-essential | DNA-binding transcriptional repressor                  | 2.45  |
| b1594 | dgsA | Isolate 2 | non-essential | DNA-binding transcriptional repressor                  | 5.98  |
| b1595 | ynfL | Isolate 1 | non-essential | predicted DNA-binding transcriptional regulator        | 0.11  |
| b1595 | ynfL | Isolate 2 | non-essential | predicted DNA-binding transcriptional regulator        | 0.30  |
| b1596 | ynfM | Isolate 1 | non-essential | predicted transporter                                  | 0.34  |
| b1596 | ynfM | Isolate 2 | non-essential | predicted transporter                                  | 1.15  |
| b1597 | asr  | Isolate 1 | non-essential | acid shock-inducible periplasmic protein               | -1.84 |
| b1597 | asr  | Isolate 2 | non-essential | acid shock-inducible periplasmic protein               | 1.00  |
| b1598 | ydgD | Isolate 1 | non-essential | predicted peptidase                                    | 0.05  |
| b1598 | ydgD | Isolate 2 | non-essential | predicted peptidase                                    | -1.51 |
| b1599 | mdtI | Isolate 1 | non-essential | multidrug efflux system transporter                    | -1.27 |
| b1599 | mdtI | Isolate 2 | non-essential | multidrug efflux system transporter                    | 0.20  |
| b1600 | mdtJ | Isolate 1 | non-essential | multidrug efflux system transporter                    | -0.92 |
| b1600 | mdtJ | Isolate 2 | non-essential | multidrug efflux system transporter                    | 0.80  |
| b1601 | ydgG | Isolate 1 | non-essential | predicted inner membrane protein                       | -0.57 |
| b1601 | ydgG | Isolate 2 | non-essential | predicted inner membrane protein                       | -0.23 |
| b1602 | pntB | Isolate 1 | non-essential | pyridine nucleotide transhydrogenase, beta subunit     | -0.20 |
| b1602 | pntB | Isolate 2 | non-essential | pyridine nucleotide transhydrogenase, beta subunit     | 0.80  |
| b1603 | pntA | Isolate 1 | non-essential | pyridine nucleotide transhydrogenase, alpha subunit    | 0.38  |
| b1603 | pntA | Isolate 2 | non-essential | pyridine nucleotide transhydrogenase, alpha subunit    | -0.58 |
| b1604 | ydgH | Isolate 1 | non-essential | predicted protein                                      | -0.74 |
| b1604 | ydgH | Isolate 2 | non-essential | predicted protein                                      | -1.06 |

|       |      |           |               |                                                                                 |       |
|-------|------|-----------|---------------|---------------------------------------------------------------------------------|-------|
| b1605 | ydgI | Isolate 1 | non-essential | predicted arginine/ornithine antiporter transporter                             | -1.42 |
| b1605 | ydgI | Isolate 2 | non-essential | predicted arginine/ornithine antiporter transporter                             | 1.00  |
| b1606 | folM | Isolate 1 | non-essential | dihydrofolate reductase isozyme                                                 | 0.70  |
| b1606 | folM | Isolate 2 | non-essential | dihydrofolate reductase isozyme                                                 | -0.55 |
| b1607 | ydgC | Isolate 1 | non-essential | conserved inner membrane protein associated with alginate biosynthesis          | 0.97  |
| b1607 | ydgC | Isolate 2 | non-essential | conserved inner membrane protein associated with alginate biosynthesis          | 0.82  |
| b1608 | rstA | Isolate 1 | non-essential | DNA-binding response regulator in two-component regulatory system with RstB     | 1.47  |
| b1608 | rstA | Isolate 2 | non-essential | DNA-binding response regulator in two-component regulatory system with RstB     | -0.77 |
| b1609 | rstB | Isolate 1 | non-essential | sensory histidine kinase in two-component regulatory system with RstA           | 0.59  |
| b1609 | rstB | Isolate 2 | non-essential | sensory histidine kinase in two-component regulatory system with RstA           | 0.86  |
| b1610 | dps  | Isolate 1 | non-essential | inhibitor of replication at Ter, DNA-binding protein                            | -0.57 |
| b1610 | tus  | Isolate 2 | non-essential | inhibitor of replication at Ter, DNA-binding protein                            | -0.30 |
| b1611 | fumC | Isolate 1 | non-essential | fumarate hydratase (fumarase C), aerobic Class II                               | 2.15  |
| b1611 | fumC | Isolate 2 | non-essential | fumarate hydratase (fumarase C), aerobic Class II                               | 2.35  |
| b1612 | fumA | Isolate 1 | non-essential | aerobic Class I fumarate hydratase (fumarase A)                                 | 1.65  |
| b1612 | fumA | Isolate 2 | non-essential | aerobic Class I fumarate hydratase (fumarase A)                                 | -0.45 |
| b1613 | manA | Isolate 1 | non-essential | mannose-6-phosphate isomerase                                                   | 0.37  |
| b1613 | manA | Isolate 2 | non-essential | mannose-6-phosphate isomerase                                                   | 0.49  |
| b1614 | ydgA | Isolate 1 | non-essential | conserved protein                                                               | -0.58 |
| b1614 | ydgA | Isolate 2 | non-essential | conserved protein                                                               | 1.28  |
| b1615 | uidC | Isolate 1 | non-essential | predicted outer membrane porin protein                                          | 0.15  |
| b1615 | uidC | Isolate 2 | non-essential | predicted outer membrane porin protein                                          | 0.32  |
| b1616 | uidB | Isolate 1 | non-essential | glucuronide transporter                                                         | -0.28 |
| b1616 | uidB | Isolate 2 | non-essential | glucuronide transporter                                                         | 0.55  |
| b1617 | uidA | Isolate 1 | non-essential | beta-D-glucuronidase                                                            | -0.09 |
| b1617 | uidA | Isolate 2 | non-essential | beta-D-glucuronidase                                                            | -0.82 |
| b1618 | uidR | Isolate 1 | non-essential | DNA-binding transcriptional repressor                                           | 0.30  |
| b1618 | uidR | Isolate 2 | non-essential | DNA-binding transcriptional repressor                                           | 3.82  |
| b1619 | hdhA | Isolate 1 | non-essential | 7alpha-hydroxysteroid dehydrogenase, NAD-dependent                              | -1.99 |
| b1619 | hdhA | Isolate 2 | non-essential | 7alpha-hydroxysteroid dehydrogenase, NAD-dependent                              | 1.02  |
| b1620 | malI | Isolate 1 | non-essential | DNA-binding transcriptional repressor                                           | -0.44 |
| b1620 | malI | Isolate 2 | non-essential | DNA-binding transcriptional repressor                                           | -0.25 |
| b1621 | malX | Isolate 1 | non-essential | fused maltose and glucose-specific PTS enzyme IIBC components                   | -0.53 |
| b1621 | malX | Isolate 2 | non-essential | fused maltose and glucose-specific PTS enzyme IIBC components                   | 0.00  |
| b1622 | malY | Isolate 1 | non-essential | bifunctional beta-cystathionase, PLP-dependent -!- regulator of maltose regulon | -0.73 |
| b1622 | malY | Isolate 2 | non-essential | bifunctional beta-cystathionase, PLP-dependent -!- regulator of maltose regulon | -2.03 |
| b1623 | add  | Isolate 1 | non-essential | adenosine deaminase                                                             | 2.74  |
| b1623 | add  | Isolate 2 | non-essential | adenosine deaminase                                                             | 0.48  |
| b1624 | ydgJ | Isolate 1 | non-essential | predicted oxidoreductase                                                        | 0.34  |
| b1624 | ydgJ | Isolate 2 | non-essential | predicted oxidoreductase                                                        | -1.01 |
| b1625 | ydgT | Isolate 1 | non-essential | predicted regulator                                                             | -0.81 |
| b1625 | ydgT | Isolate 2 | non-essential | predicted regulator                                                             | -0.16 |
| b1626 | ydgK | Isolate 1 | non-essential | conserved inner membrane protein                                                | 0.13  |

|       |      |           |               |                                                                |       |
|-------|------|-----------|---------------|----------------------------------------------------------------|-------|
| b1626 | ydgK | Isolate 2 | non-essential | conserved inner membrane protein                               | -1.76 |
| b1627 | rsxA | Isolate 1 | non-essential | predicted inner membrane subunit                               | -0.08 |
| b1627 | rsxA | Isolate 2 | non-essential | predicted inner membrane subunit                               | 0.11  |
| b1628 | rsxB | Isolate 1 | non-essential | predicted iron-sulfur protein                                  | -1.02 |
| b1628 | rsxB | Isolate 2 | non-essential | predicted iron-sulfur protein                                  | -3.07 |
| b1629 | rsxC | Isolate 1 | non-essential | fused predicted 4Fe-4S ferredoxin-type protein                 | -0.53 |
| b1629 | rsxC | Isolate 2 | non-essential | fused predicted 4Fe-4S ferredoxin-type protein                 | -0.50 |
| b1630 | rsxD | Isolate 1 | non-essential | predicted inner membrane oxidoreductase                        | 0.17  |
| b1630 | rsxD | Isolate 2 | non-essential | predicted inner membrane oxidoreductase                        | 0.13  |
| b1631 | rsxG | Isolate 1 | non-essential | predicted oxidoreductase                                       | -1.42 |
| b1631 | rsxG | Isolate 2 | non-essential | predicted oxidoreductase                                       | 0.17  |
| b1632 | rsxE | Isolate 1 | non-essential | predicted inner membrane NADH-quinone reductase                | -0.21 |
| b1632 | rsxE | Isolate 2 | non-essential | predicted inner membrane NADH-quinone reductase                | -1.08 |
| b1633 | nth  | Isolate 1 | non-essential | DNA glycosylase and apyrimidinic (AP) lyase (endonuclease III) | 1.90  |
| b1633 | nth  | Isolate 2 | non-essential | DNA glycosylase and apyrimidinic (AP) lyase (endonuclease III) | -0.13 |
| b1634 | ydgR | Isolate 1 | non-essential | predicted transporter                                          | 0.50  |
| b1634 | ydgR | Isolate 2 | non-essential | predicted transporter                                          | -0.72 |
| b1635 | gst  | Isolate 1 | non-essential | glutathionine S-transferase                                    | -0.45 |
| b1635 | gst  | Isolate 2 | non-essential | glutathionine S-transferase                                    | 0.77  |
| b1636 | pdxY | Isolate 1 | non-essential | pyridoxal kinase 2/pyridoxine kinase                           | -0.41 |
| b1636 | pdxY | Isolate 2 | non-essential | pyridoxal kinase 2/pyridoxine kinase                           | 3.92  |
| b1637 | tyrS | Isolate 1 | essential     | tyrosyl-tRNA synthetase                                        | -0.93 |
| b1638 | pdxH | Isolate 1 | non-essential | pyridoxine 5'-phosphate oxidase                                | 0.01  |
| b1638 | pdxH | Isolate 2 | non-essential | pyridoxine 5'-phosphate oxidase                                | -1.42 |
| b1639 | ydhA | Isolate 1 | non-essential | predicted lipoprotein                                          | 0.86  |
| b1639 | ydhA | Isolate 2 | non-essential | predicted lipoprotein                                          | 2.77  |
| b1640 | ydhH | Isolate 1 | non-essential | conserved protein                                              | 0.42  |
| b1640 | ydhH | Isolate 2 | non-essential | conserved protein                                              | 0.56  |
| b1641 | slyB | Isolate 1 | non-essential | outer membrane lipoprotein                                     | 2.93  |
| b1641 | slyB | Isolate 2 | non-essential | outer membrane lipoprotein                                     | 1.99  |
| b1642 | slyA | Isolate 1 | non-essential | DNA-binding transcriptional activator                          | 1.60  |
| b1642 | slyA | Isolate 2 | non-essential | DNA-binding transcriptional activator                          | 1.31  |
| b1643 | ydhI | Isolate 1 | non-essential | predicted inner membrane protein                               | -0.46 |
| b1643 | ydhI | Isolate 2 | non-essential | predicted inner membrane protein                               | -1.65 |
| b1644 | ydhJ | Isolate 1 | non-essential | undecaprenyl pyrophosphate phosphatase                         | 0.18  |
| b1644 | ydhJ | Isolate 2 | non-essential | undecaprenyl pyrophosphate phosphatase                         | 1.31  |
| b1645 | ydhK | Isolate 1 | non-essential | conserved inner membrane protein                               | -0.65 |
| b1645 | ydhK | Isolate 2 | non-essential | conserved inner membrane protein                               | -1.67 |
| b1646 | sodC | Isolate 1 | non-essential | superoxide dismutase, Cu, Zn                                   | 1.32  |
| b1646 | sodC | Isolate 2 | non-essential | superoxide dismutase, Cu, Zn                                   | -0.29 |
| b1647 | ydhF | Isolate 1 | non-essential | predicted oxidoreductase                                       | 0.00  |
| b1647 | ydhF | Isolate 2 | non-essential | predicted oxidoreductase                                       | -1.18 |
| b1648 | ydhL | Isolate 1 | non-essential | conserved protein                                              | -0.28 |

|       |      |           |               |                                                                                            |       |
|-------|------|-----------|---------------|--------------------------------------------------------------------------------------------|-------|
| b1648 | ydhL | Isolate 2 | non-essential | conserved protein                                                                          | -0.26 |
| b1649 | ydhM | Isolate 1 | non-essential | predicted DNA-binding transcriptional regulator                                            | -1.55 |
| b1649 | ydhM | Isolate 2 | non-essential | predicted DNA-binding transcriptional regulator                                            | -1.59 |
| b1650 | nemA | Isolate 1 | non-essential | N-ethylmaleimide reductase, FMN-linked                                                     | 1.65  |
| b1650 | nemA | Isolate 2 | non-essential | N-ethylmaleimide reductase, FMN-linked                                                     | 0.03  |
| b1651 | gloA | Isolate 1 | non-essential | glyoxalase I, Ni-dependent                                                                 | -0.06 |
| b1651 | gloA | Isolate 2 | non-essential | glyoxalase I, Ni-dependent                                                                 | 0.25  |
| b1652 | rnt  | Isolate 1 | non-essential | ribonuclease T (RNase T)                                                                   | -0.21 |
| b1652 | rnt  | Isolate 2 | non-essential | ribonuclease T (RNase T)                                                                   | -0.45 |
| b1653 | lhr  | Isolate 1 | non-essential | predicted ATP-dependent helicase                                                           | -1.15 |
| b1653 | lhr  | Isolate 2 | non-essential | predicted ATP-dependent helicase                                                           | -0.46 |
| b1654 | ydhD | Isolate 1 | non-essential | conserved protein                                                                          | 0.64  |
| b1654 | ydhD | Isolate 2 | non-essential | conserved protein                                                                          | -0.20 |
| b1655 | ydhO | Isolate 1 | non-essential | predicted lipoprotein                                                                      | -2.05 |
| b1655 | ydhO | Isolate 2 | non-essential | predicted lipoprotein                                                                      | -0.05 |
| b1656 | sodB | Isolate 1 | non-essential | superoxide dismutase, Fe                                                                   | 1.57  |
| b1656 | sodB | Isolate 2 | non-essential | superoxide dismutase, Fe                                                                   | 0.84  |
| b1657 | ydhP | Isolate 1 | non-essential | predicted transporter                                                                      | 0.80  |
| b1657 | ydhP | Isolate 2 | non-essential | predicted transporter                                                                      | 0.02  |
| b1658 | purR | Isolate 1 | non-essential | DNA-binding transcriptional repressor, hypoxanthine-binding                                | 0.25  |
| b1658 | purR | Isolate 2 | non-essential | DNA-binding transcriptional repressor, hypoxanthine-binding                                | -1.51 |
| b1659 | ydhB | Isolate 1 | non-essential | predicted DNA-binding transcriptional regulator                                            | 2.87  |
| b1659 | ydhB | Isolate 2 | non-essential | predicted DNA-binding transcriptional regulator                                            | 0.04  |
| b1660 | ydhC | Isolate 1 | non-essential | predicted transporter                                                                      | -1.72 |
| b1660 | ydhC | Isolate 2 | non-essential | predicted transporter                                                                      | -4.06 |
| b1661 | cfa  | Isolate 1 | non-essential | cyclopropane fatty acyl phospholipid synthase (unsaturated-phospholipid methyltransferase) | -0.68 |
| b1661 | cfa  | Isolate 2 | non-essential | cyclopropane fatty acyl phospholipid synthase (unsaturated-phospholipid methyltransferase) | -2.81 |
| b1663 | mdtK | Isolate 1 | non-essential | multidrug efflux system transporter                                                        | -1.48 |
| b1663 | mdtK | Isolate 2 | non-essential | multidrug efflux system transporter                                                        | 1.57  |
| b1664 | ydhQ | Isolate 1 | non-essential | conserved protein                                                                          | 0.25  |
| b1664 | ydhQ | Isolate 2 | non-essential | conserved protein                                                                          | 0.03  |
| b1667 | ydhR | Isolate 1 | non-essential | predicted protein                                                                          | 0.92  |
| b1667 | ydhR | Isolate 2 | non-essential | predicted protein                                                                          | -0.80 |
| b1668 | ydhS | Isolate 1 | non-essential | conserved protein with FAD/NAD(P)-binding domain                                           | -0.06 |
| b1668 | ydhS | Isolate 2 | non-essential | conserved protein with FAD/NAD(P)-binding domain                                           | 1.28  |
| b1669 | ydhT | Isolate 1 | non-essential | conserved protein                                                                          | 1.22  |
| b1669 | ydhT | Isolate 2 | non-essential | conserved protein                                                                          | 0.71  |
| b1670 | ydhU | Isolate 1 | non-essential | predicted cytochrome                                                                       | 1.12  |
| b1670 | ydhU | Isolate 2 | non-essential | predicted cytochrome                                                                       | 1.18  |
| b1671 | ydhX | Isolate 1 | non-essential | predicted 4Fe-4S ferridoxin-type protein                                                   | 1.08  |
| b1671 | ydhX | Isolate 2 | non-essential | predicted 4Fe-4S ferridoxin-type protein                                                   | 0.56  |
| b1672 | ydhW | Isolate 1 | non-essential | predicted protein                                                                          | -0.91 |
| b1672 | ydhW | Isolate 2 | non-essential | predicted protein                                                                          | 0.90  |

|       |      |           |               |                                                                                        |       |
|-------|------|-----------|---------------|----------------------------------------------------------------------------------------|-------|
| b1673 | ydhV | Isolate 1 | non-essential | predicted oxidoreductase                                                               | -0.04 |
| b1673 | ydhV | Isolate 2 | non-essential | predicted oxidoreductase                                                               | 0.36  |
| b1674 | ydhY | Isolate 1 | non-essential | predicted 4Fe-4S ferridoxin-type protein                                               | -2.05 |
| b1674 | ydhY | Isolate 2 | non-essential | predicted 4Fe-4S ferridoxin-type protein                                               | -0.44 |
| b1675 | ydhZ | Isolate 1 | non-essential | predicted protein                                                                      | 0.33  |
| b1675 | ydhZ | Isolate 2 | non-essential | predicted protein                                                                      | 1.07  |
| b1676 | pykF | Isolate 1 | non-essential | pyruvate kinase I                                                                      | 1.46  |
| b1676 | pykF | Isolate 2 | non-essential | pyruvate kinase I                                                                      | 0.36  |
| b1677 | lpp  | Isolate 1 | non-essential | murein lipoprotein                                                                     | 0.81  |
| b1677 | lpp  | Isolate 2 | non-essential | murein lipoprotein                                                                     | 1.19  |
| b1678 | ynhG | Isolate 1 | non-essential | conserved protein                                                                      | -0.02 |
| b1678 | ynhG | Isolate 2 | non-essential | conserved protein                                                                      | 0.90  |
| b1679 | sufE | Isolate 1 | non-essential | sulfur acceptor protein                                                                | 0.07  |
| b1679 | sufE | Isolate 2 | non-essential | sulfur acceptor protein                                                                | -0.97 |
| b1680 | sufS | Isolate 1 | non-essential | selenocysteine lyase, PLP-dependent                                                    | 1.90  |
| b1680 | sufS | Isolate 2 | non-essential | selenocysteine lyase, PLP-dependent                                                    | 2.23  |
| b1681 | sufD | Isolate 1 | non-essential | component of SufBCD complex                                                            | 0.96  |
| b1681 | sufD | Isolate 2 | non-essential | component of SufBCD complex                                                            | -0.41 |
| b1682 | sufC | Isolate 1 | non-essential | component of SufBCD complex, ATP-binding component of ABC superfamily                  | -0.40 |
| b1682 | sufC | Isolate 2 | non-essential | component of SufBCD complex, ATP-binding component of ABC superfamily                  | -0.04 |
| b1683 | sufB | Isolate 1 | non-essential | component of SufBCD complex                                                            | -0.20 |
| b1683 | sufB | Isolate 2 | non-essential | component of SufBCD complex                                                            | -1.64 |
| b1684 | sufA | Isolate 1 | non-essential | Fe-S cluster assembly protein                                                          | 1.88  |
| b1684 | sufA | Isolate 2 | non-essential | Fe-S cluster assembly protein                                                          | 0.03  |
| b1685 | ydiH | Isolate 1 | non-essential | predicted protein                                                                      | -0.73 |
| b1685 | ydiH | Isolate 2 | non-essential | predicted protein                                                                      | -0.57 |
| b1686 | ydiI | Isolate 1 | non-essential | conserved protein                                                                      | -0.60 |
| b1686 | ydiI | Isolate 2 | non-essential | conserved protein                                                                      | -0.74 |
| b1687 | ydiJ | Isolate 1 | non-essential | predicted FAD-linked oxidoreductase                                                    | -0.17 |
| b1687 | ydiJ | Isolate 2 | non-essential | predicted FAD-linked oxidoreductase                                                    | -0.52 |
| b1688 | ydiK | Isolate 1 | non-essential | predicted inner membrane protein                                                       | 0.05  |
| b1688 | ydiK | Isolate 2 | non-essential | predicted inner membrane protein                                                       | 0.63  |
| b1690 | ydiM | Isolate 1 | non-essential | predicted transporter                                                                  | 2.49  |
| b1690 | ydiM | Isolate 2 | non-essential | predicted transporter                                                                  | 1.76  |
| b1691 | ydiN | Isolate 1 | non-essential | predicted transporter                                                                  | 1.18  |
| b1691 | ydiN | Isolate 2 | non-essential | predicted transporter                                                                  | 1.15  |
| b1692 | ydiB | Isolate 1 | non-essential | quininate/shikimate 5-dehydrogenase, NAD(P)-binding                                    | 0.66  |
| b1692 | ydiB | Isolate 2 | non-essential | quininate/shikimate 5-dehydrogenase, NAD(P)-binding                                    | 1.55  |
| b1693 | aroD | Isolate 1 | non-essential | 3-dehydroquininate dehydratase                                                         | 2.54  |
| b1693 | aroD | Isolate 2 | non-essential | 3-dehydroquininate dehydratase                                                         | 1.29  |
| b1694 | ydiF | Isolate 1 | non-essential | fused predicted acetyl-CoA:acetoacetyl-CoA transferase: alpha subunit -!- beta subunit | -0.97 |
| b1694 | ydiF | Isolate 2 | non-essential | fused predicted acetyl-CoA:acetoacetyl-CoA transferase: alpha subunit -!- beta subunit | 0.88  |
| b1695 | ydiO | Isolate 1 | non-essential | predicted acyl-CoA dehydrogenase                                                       | -0.01 |

|       |      |           |               |                                                                              |       |
|-------|------|-----------|---------------|------------------------------------------------------------------------------|-------|
| b1695 | ydiO | Isolate 2 | non-essential | predicted acyl-CoA dehydrogenase                                             | -0.88 |
| b1696 | ydiP | Isolate 1 | non-essential | predicted DNA-binding transcriptional regulator                              | 1.42  |
| b1696 | ydiP | Isolate 2 | non-essential | predicted DNA-binding transcriptional regulator                              | -0.27 |
| b1697 | ydiQ | Isolate 1 | non-essential | conserved protein                                                            | 0.53  |
| b1697 | ydiQ | Isolate 2 | non-essential | conserved protein                                                            | 0.60  |
| b1698 | ydiR | Isolate 1 | non-essential | predicted electron transfer flavoprotein, FAD-binding                        | 0.57  |
| b1698 | ydiR | Isolate 2 | non-essential | predicted electron transfer flavoprotein, FAD-binding                        | 1.48  |
| b1699 | ydiS | Isolate 1 | non-essential | predicted oxidoreductase, FAD/NAD(P)-binding domain                          | 0.01  |
| b1699 | ydiS | Isolate 2 | non-essential | predicted oxidoreductase, FAD/NAD(P)-binding domain                          | 0.18  |
| b1700 | ydiT | Isolate 1 | non-essential | predicted 4Fe-4S ferredoxin-type protein                                     | -0.56 |
| b1700 | ydiT | Isolate 2 | non-essential | predicted 4Fe-4S ferredoxin-type protein                                     | -0.20 |
| b1701 | ydiD | Isolate 1 | non-essential | short chain acyl-CoA synthetase, anaerobic                                   | -0.55 |
| b1701 | ydiD | Isolate 2 | non-essential | short chain acyl-CoA synthetase, anaerobic                                   | 0.88  |
| b1702 | pps  | Isolate 1 | non-essential | phosphoenolpyruvate synthase                                                 | 0.72  |
| b1702 | pps  | Isolate 2 | non-essential | phosphoenolpyruvate synthase                                                 | -0.76 |
| b1703 | ydiA | Isolate 1 | non-essential | conserved protein                                                            | 0.82  |
| b1703 | ydiA | Isolate 2 | non-essential | conserved protein                                                            | -0.95 |
| b1704 | aroH | Isolate 1 | non-essential | 3-deoxy-D-arabino-heptulosonate-7-phosphate synthase, tryptophan repressible | 1.18  |
| b1704 | aroH | Isolate 2 | non-essential | 3-deoxy-D-arabino-heptulosonate-7-phosphate synthase, tryptophan repressible | 1.81  |
| b1705 | ydiE | Isolate 1 | non-essential | conserved protein                                                            | 1.21  |
| b1705 | ydiE | Isolate 2 | non-essential | conserved protein                                                            | -1.19 |
| b1706 | ydiU | Isolate 1 | non-essential | conserved protein                                                            | 0.46  |
| b1706 | ydiU | Isolate 2 | non-essential | conserved protein                                                            | -0.58 |
| b1707 | ydiV | Isolate 1 | non-essential | conserved protein                                                            | 0.08  |
| b1707 | ydiV | Isolate 2 | non-essential | conserved protein                                                            | -0.43 |
| b1708 | nlpC | Isolate 1 | non-essential | predicted lipoprotein                                                        | 2.58  |
| b1708 | nlpC | Isolate 2 | non-essential | predicted lipoprotein                                                        | 1.58  |
| b1709 | btuD | Isolate 1 | non-essential | vitamin B12 transporter subunit -!- ATP-binding component of ABC superfamily | 0.35  |
| b1709 | btuD | Isolate 2 | non-essential | vitamin B12 transporter subunit -!- ATP-binding component of ABC superfamily | 0.32  |
| b1710 | btuE | Isolate 1 | non-essential | predicted glutathione peroxidase                                             | 0.69  |
| b1710 | btuE | Isolate 2 | non-essential | predicted glutathione peroxidase                                             | 1.63  |
| b1711 | btuC | Isolate 1 | non-essential | vitamin B12 transporter subunit -!- membrane component of ABC superfamily    | 1.54  |
| b1711 | btuC | Isolate 2 | non-essential | vitamin B12 transporter subunit -!- membrane component of ABC superfamily    | 1.40  |
| b1712 | ihfA | Isolate 1 | non-essential | integration host factor (IHF), DNA-binding protein, alpha subunit            | -0.05 |
| b1712 | ihfA | Isolate 2 | non-essential | integration host factor (IHF), DNA-binding protein, alpha subunit            | 2.45  |
| b1713 | pheT | Isolate 1 | essential     | phenylalanine tRNA synthetase, beta subunit                                  | 2.51  |
| b1714 | pheS | Isolate 1 | essential     | phenylalanine tRNA synthetase, alpha subunit                                 | -6.19 |
| b1715 | pheM | Isolate 1 | non-essential | phenylalanyl-tRNA synthetase operon leader peptide                           | -0.82 |
| b1715 | pheM | Isolate 2 | non-essential | phenylalanyl-tRNA synthetase operon leader peptide                           | -0.04 |
| b1717 | rpmI | Isolate 1 | non-essential | 50S ribosomal subunit protein L35                                            | 0.39  |
| b1717 | rpmI | Isolate 2 | non-essential | 50S ribosomal subunit protein L35                                            | 0.51  |
| b1718 | infC | Isolate 1 | essential     | protein chain initiation factor IF-3                                         | 0.65  |
| b1719 | thrS | Isolate 1 | essential     | threonyl-tRNA synthetase                                                     | -3.36 |



|       |      |           |               |                                                              |       |
|-------|------|-----------|---------------|--------------------------------------------------------------|-------|
| b1720 | arpB | Isolate 1 | *             | predicted protein, N-ter fragment (pseudogene)               | -0.77 |
| b1720 | arpB | Isolate 2 | *             | predicted protein, N-ter fragment (pseudogene)               | 1.60  |
| b1722 | ydiY | Isolate 1 | non-essential | conserved protein                                            | -0.54 |
| b1722 | ydiY | Isolate 2 | non-essential | conserved protein                                            | 0.73  |
| b1723 | pfkB | Isolate 1 | non-essential | 6-phosphofructokinase II                                     | 0.35  |
| b1723 | pfkB | Isolate 2 | non-essential | 6-phosphofructokinase II                                     | -0.18 |
| b1724 | ydiZ | Isolate 1 | non-essential | predicted protein                                            | 0.47  |
| b1724 | ydiZ | Isolate 2 | non-essential | predicted protein                                            | 4.01  |
| b1725 | yniA | Isolate 1 | non-essential | predicted phosphotransferase/kinase                          | -1.29 |
| b1725 | yniA | Isolate 2 | non-essential | predicted phosphotransferase/kinase                          | 0.14  |
| b1726 | yniB | Isolate 1 | non-essential | predicted inner membrane protein                             | -0.28 |
| b1726 | yniB | Isolate 2 | non-essential | predicted inner membrane protein                             | -2.12 |
| b1727 | yniC | Isolate 1 | non-essential | predicted hydrolase                                          | 0.89  |
| b1727 | yniC | Isolate 2 | non-essential | predicted hydrolase                                          | 0.21  |
| b1728 | ydjM | Isolate 1 | non-essential | predicted inner membrane protein regulated by LexA           | 0.53  |
| b1728 | ydjM | Isolate 2 | non-essential | predicted inner membrane protein regulated by LexA           | 0.92  |
| b1729 | ydjN | Isolate 1 | non-essential | predicted transporter                                        | 1.59  |
| b1729 | ydjN | Isolate 2 | non-essential | predicted transporter                                        | 1.46  |
| b1730 | ydjO | Isolate 1 | non-essential | predicted protein                                            | 1.23  |
| b1730 | ydjO | Isolate 2 | non-essential | predicted protein                                            | -1.45 |
| b1731 | cedA | Isolate 1 | non-essential | cell division modulator                                      | -0.28 |
| b1731 | cedA | Isolate 2 | non-essential | cell division modulator                                      | -0.03 |
| b1732 | katE | Isolate 1 | non-essential | hydroperoxidase HP(II)(III) (catalase)                       | -0.04 |
| b1732 | katE | Isolate 2 | non-essential | hydroperoxidase HP(II)(III) (catalase)                       | 2.52  |
| b1733 | chbG | Isolate 1 | non-essential | conserved protein                                            | 0.32  |
| b1733 | chbG | Isolate 2 | non-essential | conserved protein                                            | -0.72 |
| b1734 | chbF | Isolate 1 | non-essential | cryptic phospho-beta-glucosidase, NAD(P)-binding             | -1.77 |
| b1734 | chbF | Isolate 2 | non-essential | cryptic phospho-beta-glucosidase, NAD(P)-binding             | -1.11 |
| b1735 | chbR | Isolate 1 | non-essential | DNA-binding transcriptional dual regulator                   | 1.23  |
| b1735 | chbR | Isolate 2 | non-essential | DNA-binding transcriptional dual regulator                   | 2.03  |
| b1736 | chbA | Isolate 1 | non-essential | N,N'-diacetylchitobiose-specific enzyme IIA component of PTS | 1.29  |
| b1736 | chbA | Isolate 2 | non-essential | N,N'-diacetylchitobiose-specific enzyme IIA component of PTS | -0.53 |
| b1737 | chbC | Isolate 1 | non-essential | N,N'-diacetylchitobiose-specific enzyme IIC component of PTS | 0.55  |
| b1737 | chbC | Isolate 2 | non-essential | N,N'-diacetylchitobiose-specific enzyme IIC component of PTS | 0.01  |
| b1738 | chbB | Isolate 1 | non-essential | N,N'-diacetylchitobiose-specific enzyme IIB component of PTS | 1.50  |
| b1738 | chbB | Isolate 2 | non-essential | N,N'-diacetylchitobiose-specific enzyme IIB component of PTS | 0.15  |
| b1739 | osmE | Isolate 1 | non-essential | DNA-binding transcriptional regulator                        | 0.98  |
| b1739 | osmE | Isolate 2 | non-essential | DNA-binding transcriptional regulator                        | 0.93  |
| b1740 | nadE | Isolate 1 | essential     | NAD synthetase, NH <sub>3</sub> /glutamine-dependent         | -2.51 |
| b1741 | ydjQ | Isolate 1 | non-essential | endonuclease of nucleotide excision repair                   | 0.27  |
| b1741 | ydjQ | Isolate 2 | non-essential | endonuclease of nucleotide excision repair                   | 0.03  |
| b1743 | spy  | Isolate 1 | non-essential | envelope stress induced periplasmic protein                  | -1.03 |
| b1743 | spy  | Isolate 2 | non-essential | envelope stress induced periplasmic protein                  | -0.25 |

|       |      |           |               |                                                                            |       |
|-------|------|-----------|---------------|----------------------------------------------------------------------------|-------|
| b1744 | astE | Isolate 1 | non-essential | succinylglutamate desuccinylase                                            | -0.36 |
| b1744 | astE | Isolate 2 | non-essential | succinylglutamate desuccinylase                                            | 1.72  |
| b1745 | astB | Isolate 1 | non-essential | succinylarginine dihydrolase                                               | 3.51  |
| b1745 | astB | Isolate 2 | non-essential | succinylarginine dihydrolase                                               | -1.36 |
| b1746 | astD | Isolate 1 | non-essential | succinylglutamic semialdehyde dehydrogenase                                | 1.01  |
| b1746 | astD | Isolate 2 | non-essential | succinylglutamic semialdehyde dehydrogenase                                | 0.22  |
| b1747 | astA | Isolate 1 | non-essential | arginine succinyltransferase                                               | 0.60  |
| b1747 | astA | Isolate 2 | non-essential | arginine succinyltransferase                                               | 0.69  |
| b1748 | astC | Isolate 1 | non-essential | succinylornithine transaminase, PLP-dependent                              | 1.96  |
| b1748 | astC | Isolate 2 | non-essential | succinylornithine transaminase, PLP-dependent                              | 1.77  |
| b1749 | xthA | Isolate 1 | non-essential | exonuclease III                                                            | -0.73 |
| b1749 | xthA | Isolate 2 | non-essential | exonuclease III                                                            | -0.98 |
| b1750 | ydjX | Isolate 1 | non-essential | predicted inner membrane protein                                           | 0.35  |
| b1750 | ydjX | Isolate 2 | non-essential | predicted inner membrane protein                                           | -1.51 |
| b1751 | ydjY | Isolate 1 | non-essential | predicted protein                                                          | -0.18 |
| b1751 | ydjY | Isolate 2 | non-essential | predicted protein                                                          | -0.77 |
| b1752 | ydjZ | Isolate 1 | non-essential | conserved inner membrane protein                                           | -0.09 |
| b1752 | ydjZ | Isolate 2 | non-essential | conserved inner membrane protein                                           | -0.05 |
| b1753 | ynjA | Isolate 1 | non-essential | conserved protein                                                          | 0.49  |
| b1753 | ynjA | Isolate 2 | non-essential | conserved protein                                                          | -0.39 |
| b1754 | ynjB | Isolate 1 | non-essential | conserved protein                                                          | 0.09  |
| b1754 | ynjB | Isolate 2 | non-essential | conserved protein                                                          | -0.47 |
| b1755 | ynjC | Isolate 1 | non-essential | fused transporter subunits -!- membrane component of ABC superfamily       | 0.26  |
| b1755 | ynjC | Isolate 2 | non-essential | fused transporter subunits -!- membrane component of ABC superfamily       | -0.20 |
| b1756 | ynjD | Isolate 1 | non-essential | predicted transporter subunit -!- ATP-binding component of ABC superfamily | -1.09 |
| b1756 | ynjD | Isolate 2 | non-essential | predicted transporter subunit -!- ATP-binding component of ABC superfamily | -0.20 |
| b1757 | ynjE | Isolate 1 | non-essential | predicted thiosulfate sulfur transferase                                   | 0.72  |
| b1757 | ynjE | Isolate 2 | non-essential | predicted thiosulfate sulfur transferase                                   | 0.70  |
| b1758 | ynjF | Isolate 1 | non-essential | predicted phosphatidyl transferase, inner membrane protein                 | 0.83  |
| b1758 | ynjF | Isolate 2 | non-essential | predicted phosphatidyl transferase, inner membrane protein                 | 1.34  |
| b1759 | nudG | Isolate 1 | non-essential | pyrimidine (deoxy)nucleoside triphosphate pyrophosphohydrolase             | -1.87 |
| b1759 | nudG | Isolate 2 | non-essential | pyrimidine (deoxy)nucleoside triphosphate pyrophosphohydrolase             | -0.94 |
| b1760 | ynjH | Isolate 1 | non-essential | predicted protein                                                          | -1.97 |
| b1760 | ynjH | Isolate 2 | non-essential | predicted protein                                                          | -2.05 |
| b1761 | gdhA | Isolate 1 | non-essential | glutamate dehydrogenase, NADP-specific                                     | 0.11  |
| b1761 | gdhA | Isolate 2 | non-essential | glutamate dehydrogenase, NADP-specific                                     | 1.95  |
| b1762 | ynjI | Isolate 1 | non-essential | predicted inner membrane protein                                           | -0.45 |
| b1762 | ynjI | Isolate 2 | non-essential | predicted inner membrane protein                                           | -2.28 |
| b1763 | topB | Isolate 1 | non-essential | DNA topoisomerase III                                                      | 0.19  |
| b1763 | topB | Isolate 2 | non-essential | DNA topoisomerase III                                                      | 0.90  |
| b1764 | selD | Isolate 1 | non-essential | selenophosphate synthase                                                   | 1.12  |
| b1764 | selD | Isolate 2 | non-essential | selenophosphate synthase                                                   | -0.28 |
| b1765 | ydjA | Isolate 1 | non-essential | predicted oxidoreductase                                                   | 1.77  |

|       |      |           |               |                                                                 |       |
|-------|------|-----------|---------------|-----------------------------------------------------------------|-------|
| b1765 | ydjA | Isolate 2 | non-essential | predicted oxidoreductase                                        | 0.60  |
| b1766 | sppA | Isolate 1 | non-essential | protease IV (signal peptide peptidase)                          | -1.45 |
| b1766 | sppA | Isolate 2 | non-essential | protease IV (signal peptide peptidase)                          | -0.43 |
| b1767 | ansA | Isolate 1 | non-essential | cytoplasmic L-asparaginase I                                    | -0.21 |
| b1767 | ansA | Isolate 2 | non-essential | cytoplasmic L-asparaginase I                                    | -0.13 |
| b1768 | pncA | Isolate 1 | non-essential | nicotinamidase/pyrazinamidase                                   | 1.66  |
| b1768 | pncA | Isolate 2 | non-essential | nicotinamidase/pyrazinamidase                                   | -0.53 |
| b1769 | ydjE | Isolate 1 | non-essential | predicted transporter                                           | -0.54 |
| b1769 | ydjE | Isolate 2 | non-essential | predicted transporter                                           | 0.30  |
| b1770 | ydjF | Isolate 1 | non-essential | predicted DNA-binding transcriptional regulator                 | 0.19  |
| b1770 | ydjF | Isolate 2 | non-essential | predicted DNA-binding transcriptional regulator                 | 0.96  |
| b1771 | ydjG | Isolate 1 | non-essential | predicted oxidoreductase                                        | -0.20 |
| b1771 | ydjG | Isolate 2 | non-essential | predicted oxidoreductase                                        | 0.12  |
| b1772 | ydjH | Isolate 1 | non-essential | predicted kinase                                                | -0.61 |
| b1772 | ydjH | Isolate 2 | non-essential | predicted kinase                                                | -0.52 |
| b1773 | ydjI | Isolate 1 | non-essential | predicted aldolase                                              | 3.16  |
| b1773 | ydjI | Isolate 2 | non-essential | predicted aldolase                                              | 2.21  |
| b1774 | ydjJ | Isolate 1 | non-essential | predicted oxidoreductase, Zn-dependent and NAD(P)-binding       | 0.01  |
| b1774 | ydjJ | Isolate 2 | non-essential | predicted oxidoreductase, Zn-dependent and NAD(P)-binding       | 0.80  |
| b1775 | ydjK | Isolate 1 | non-essential | predicted transporter                                           | 0.67  |
| b1775 | ydjK | Isolate 2 | non-essential | predicted transporter                                           | 0.62  |
| b1776 | ydjL | Isolate 1 | non-essential | predicted oxidoreductase, Zn-dependent and NAD(P)-binding       | -0.68 |
| b1776 | ydjL | Isolate 2 | non-essential | predicted oxidoreductase, Zn-dependent and NAD(P)-binding       | 1.56  |
| b1777 | yeaC | Isolate 1 | non-essential | conserved protein                                               | -1.49 |
| b1777 | yeaC | Isolate 2 | non-essential | conserved protein                                               | 0.42  |
| b1778 | yeaA | Isolate 1 | non-essential | methionine sulfoxide reductase B                                | 3.00  |
| b1778 | yeaA | Isolate 2 | non-essential | methionine sulfoxide reductase B                                | 0.94  |
| b1779 | gapA | Isolate 1 | essential     | glyceraldehyde-3-phosphate dehydrogenase A                      | -2.18 |
| b1780 | yeaD | Isolate 1 | non-essential | conserved protein                                               | 0.72  |
| b1780 | yeaD | Isolate 2 | non-essential | conserved protein                                               | -1.21 |
| b1781 | yeaE | Isolate 1 | non-essential | predicted oxidoreductase                                        | -0.90 |
| b1781 | yeaE | Isolate 2 | non-essential | predicted oxidoreductase                                        | -0.04 |
| b1782 | mipA | Isolate 1 | non-essential | scaffolding protein for murein synthesizing machinery           | -3.30 |
| b1782 | mipA | Isolate 2 | non-essential | scaffolding protein for murein synthesizing machinery           | 1.29  |
| b1783 | yeaG | Isolate 1 | non-essential | conserved protein with nucleoside triphosphate hydrolase domain | 2.21  |
| b1783 | yeaG | Isolate 2 | non-essential | conserved protein with nucleoside triphosphate hydrolase domain | 0.60  |
| b1784 | yeaH | Isolate 1 | non-essential | conserved protein                                               | -0.44 |
| b1784 | yeaH | Isolate 2 | non-essential | conserved protein                                               | 0.10  |
| b1785 | yeaI | Isolate 1 | non-essential | predicted diguanylate cyclase                                   | -1.31 |
| b1785 | yeaI | Isolate 2 | non-essential | predicted diguanylate cyclase                                   | -2.38 |
| b1786 | yeaJ | Isolate 1 | non-essential | predicted diguanylate cyclase                                   | 0.33  |
| b1786 | yeaJ | Isolate 2 | non-essential | predicted diguanylate cyclase                                   | 0.46  |
| b1787 | yeaK | Isolate 1 | non-essential | conserved protein                                               | 0.30  |

|       |      |           |               |                                                                 |       |
|-------|------|-----------|---------------|-----------------------------------------------------------------|-------|
| b1787 | yeaK | Isolate 2 | non-essential | conserved protein                                               | -0.41 |
| b1789 | yeaL | Isolate 1 | non-essential | conserved inner membrane protein                                | 0.48  |
| b1789 | yeaL | Isolate 2 | non-essential | conserved inner membrane protein                                | 1.99  |
| b1790 | yeaM | Isolate 1 | non-essential | predicted DNA-binding transcriptional regulator                 | -1.80 |
| b1790 | yeaM | Isolate 2 | non-essential | predicted DNA-binding transcriptional regulator                 | -0.73 |
| b1791 | yeaN | Isolate 1 | non-essential | predicted transporter                                           | -0.89 |
| b1791 | yeaN | Isolate 2 | non-essential | predicted transporter                                           | -3.49 |
| b1792 | yeaO | Isolate 1 | non-essential | conserved protein                                               | 0.75  |
| b1792 | yeaO | Isolate 2 | non-essential | conserved protein                                               | 0.28  |
| b1793 | yoaF | Isolate 1 | non-essential | conserved outer membrane protein                                | -0.48 |
| b1793 | yoaF | Isolate 2 | non-essential | conserved outer membrane protein                                | -7.24 |
| b1794 | yeaP | Isolate 1 | non-essential | predicted diguanylate cyclase                                   | -0.13 |
| b1794 | yeaP | Isolate 2 | non-essential | predicted diguanylate cyclase                                   | -1.15 |
| b1795 | yeaQ | Isolate 1 | non-essential | conserved inner membrane protein                                | 0.32  |
| b1795 | yeaQ | Isolate 2 | non-essential | conserved inner membrane protein                                | -0.73 |
| b1796 | yoaG | Isolate 1 | non-essential | predicted protein                                               | -0.40 |
| b1796 | yoaG | Isolate 2 | non-essential | predicted protein                                               | -0.61 |
| b1797 | yeaR | Isolate 1 | non-essential | conserved protein                                               | -0.13 |
| b1797 | yeaR | Isolate 2 | non-essential | conserved protein                                               | 1.13  |
| b1798 | yeaS | Isolate 1 | non-essential | neutral amino-acid efflux system                                | 4.01  |
| b1798 | yeaS | Isolate 2 | non-essential | neutral amino-acid efflux system                                | 0.65  |
| b1799 | yeaT | Isolate 1 | non-essential | predicted DNA-binding transcriptional regulator                 | 0.70  |
| b1799 | yeaT | Isolate 2 | non-essential | predicted DNA-binding transcriptional regulator                 | 2.80  |
| b1800 | yeaU | Isolate 1 | non-essential | predicted dehydrogenase                                         | 4.95  |
| b1800 | yeaU | Isolate 2 | non-essential | predicted dehydrogenase                                         | 4.99  |
| b1801 | yeaV | Isolate 1 | non-essential | predicted transporter                                           | -0.01 |
| b1801 | yeaV | Isolate 2 | non-essential | predicted transporter                                           | -0.64 |
| b1802 | yeaW | Isolate 1 | non-essential | predicted 2Fe-2S cluster-containing protein                     | -0.51 |
| b1802 | yeaW | Isolate 2 | non-essential | predicted 2Fe-2S cluster-containing protein                     | 0.82  |
| b1803 | yeaX | Isolate 1 | non-essential | predicted oxidoreductase                                        | 1.80  |
| b1803 | yeaX | Isolate 2 | non-essential | predicted oxidoreductase                                        | 0.04  |
| b1804 | rnd  | Isolate 1 | non-essential | ribonuclease D                                                  | 1.12  |
| b1804 | rnd  | Isolate 2 | non-essential | ribonuclease D                                                  | 0.27  |
| b1805 | fadD | Isolate 1 | non-essential | acyl-CoA synthetase (long-chain-fatty-acid--CoA ligase)         | 0.28  |
| b1805 | fadD | Isolate 2 | non-essential | acyl-CoA synthetase (long-chain-fatty-acid--CoA ligase)         | 0.44  |
| b1806 | yeaY | Isolate 1 | non-essential | predicted lipoprotein                                           | -0.38 |
| b1806 | yeaY | Isolate 2 | non-essential | predicted lipoprotein                                           | -0.70 |
| b1807 | yeaZ | Isolate 1 | essential     | predicted peptidase                                             | -4.60 |
| b1808 | yoaA | Isolate 1 | non-essential | conserved protein with nucleoside triphosphate hydrolase domain | 0.37  |
| b1808 | yoaA | Isolate 2 | non-essential | conserved protein with nucleoside triphosphate hydrolase domain | -0.02 |
| b1809 | yoaB | Isolate 1 | non-essential | conserved protein                                               | -0.77 |
| b1809 | yoaB | Isolate 2 | non-essential | conserved protein                                               | -0.98 |
| b1810 | yoaC | Isolate 1 | non-essential | predicted protein                                               | -0.64 |

|       |      |           |               |                                                            |       |
|-------|------|-----------|---------------|------------------------------------------------------------|-------|
| b1810 | yoaC | Isolate 2 | non-essential | predicted protein                                          | -0.33 |
| b1811 | yoaH | Isolate 1 | non-essential | conserved protein                                          | 1.03  |
| b1811 | yoaH | Isolate 2 | non-essential | conserved protein                                          | -0.39 |
| b1812 | pabB | Isolate 1 | non-essential | aminodeoxychorismate synthase, subunit I                   | 0.83  |
| b1812 | pabB | Isolate 2 | non-essential | aminodeoxychorismate synthase, subunit I                   | 1.60  |
| b1813 | yeaB | Isolate 1 | non-essential | predicted NUDIX hydrolase                                  | 0.83  |
| b1813 | yeaB | Isolate 2 | non-essential | predicted NUDIX hydrolase                                  | 2.71  |
| b1814 | sdaA | Isolate 1 | non-essential | L-serine deaminase I                                       | -0.36 |
| b1814 | sdaA | Isolate 2 | non-essential | L-serine deaminase I                                       | 0.61  |
| b1815 | yoaD | Isolate 1 | non-essential | predicted phosphodiesterase                                | 2.18  |
| b1815 | yoaD | Isolate 2 | non-essential | predicted phosphodiesterase                                | 0.34  |
| b1816 | yoaE | Isolate 1 | non-essential | fused predicted membrane proteins                          | 0.37  |
| b1816 | yoaE | Isolate 2 | non-essential | fused predicted membrane proteins                          | 0.54  |
| b1817 | manX | Isolate 1 | non-essential | fused mannose-specific PTS enzyme IIAB components          | 0.49  |
| b1817 | manX | Isolate 2 | non-essential | fused mannose-specific PTS enzyme IIAB components          | 0.10  |
| b1818 | manY | Isolate 1 | non-essential | mannose-specific enzyme IIC component of PTS               | -0.02 |
| b1818 | manY | Isolate 2 | non-essential | mannose-specific enzyme IIC component of PTS               | 1.86  |
| b1819 | manZ | Isolate 1 | non-essential | mannose-specific enzyme IID component of PTS               | 1.57  |
| b1819 | manZ | Isolate 2 | non-essential | mannose-specific enzyme IID component of PTS               | 1.24  |
| b1820 | yobD | Isolate 1 | non-essential | conserved inner membrane protein                           | 2.10  |
| b1820 | yobD | Isolate 2 | non-essential | conserved inner membrane protein                           | -0.29 |
| b1821 | yebN | Isolate 1 | non-essential | conserved inner membrane protein                           | -1.12 |
| b1821 | yebN | Isolate 2 | non-essential | conserved inner membrane protein                           | 0.68  |
| b1822 | rrmA | Isolate 1 | non-essential | 23S rRNA m1G745 methyltransferase                          | -0.15 |
| b1822 | rrmA | Isolate 2 | non-essential | 23S rRNA m1G745 methyltransferase                          | -0.14 |
| b1823 | cspC | Isolate 1 | non-essential | stress protein, member of the CspA-family                  | 2.54  |
| b1823 | cspC | Isolate 2 | non-essential | stress protein, member of the CspA-family                  | 3.74  |
| b1824 | yobF | Isolate 1 | non-essential | predicted protein                                          | 0.03  |
| b1824 | yobF | Isolate 2 | non-essential | predicted protein                                          | 1.77  |
| b1825 | yebO | Isolate 1 | non-essential | predicted protein                                          | -1.32 |
| b1825 | yebO | Isolate 2 | non-essential | predicted protein                                          | -1.31 |
| b1826 | yobG | Isolate 1 | non-essential | predicted protein                                          | -0.21 |
| b1826 | yobG | Isolate 2 | non-essential | predicted protein                                          | -0.45 |
| b1827 | kdgR | Isolate 1 | non-essential | predicted DNA-binding transcriptional regulator            | 0.37  |
| b1827 | kdgR | Isolate 2 | non-essential | predicted DNA-binding transcriptional regulator            | 0.47  |
| b1828 | yebQ | Isolate 1 | non-essential | predicted transporter                                      | -0.38 |
| b1828 | yebQ | Isolate 2 | non-essential | predicted transporter                                      | 0.58  |
| b1829 | htpX | Isolate 1 | non-essential | predicted endopeptidase                                    | -0.62 |
| b1829 | htpX | Isolate 2 | non-essential | predicted endopeptidase                                    | -0.18 |
| b1830 | prc  | Isolate 1 | non-essential | carboxy-terminal protease for penicillin-binding protein 3 | -0.29 |
| b1830 | prc  | Isolate 2 | non-essential | carboxy-terminal protease for penicillin-binding protein 3 | 2.80  |
| b1831 | proQ | Isolate 1 | non-essential | predicted structural transport element                     | -0.09 |
| b1831 | proQ | Isolate 2 | non-essential | predicted structural transport element                     | 0.60  |

|       |      |           |               |                                                                                                                                  |       |
|-------|------|-----------|---------------|----------------------------------------------------------------------------------------------------------------------------------|-------|
| b1832 | yebR | Isolate 1 | non-essential | conserved protein                                                                                                                | 0.97  |
| b1832 | yebR | Isolate 2 | non-essential | conserved protein                                                                                                                | 0.56  |
| b1833 | yebS | Isolate 1 | non-essential | conserved inner membrane protein                                                                                                 | -2.15 |
| b1833 | yebS | Isolate 2 | non-essential | conserved inner membrane protein                                                                                                 | -0.68 |
| b1834 | yebT | Isolate 1 | non-essential | conserved protein                                                                                                                | -0.68 |
| b1834 | yebT | Isolate 2 | non-essential | conserved protein                                                                                                                | -0.62 |
| b1835 | yebU | Isolate 1 | non-essential | predicted methyltransferase                                                                                                      | 0.32  |
| b1835 | yebU | Isolate 2 | non-essential | predicted methyltransferase                                                                                                      | 0.09  |
| b1836 | yebV | Isolate 1 | non-essential | predicted protein                                                                                                                | -0.71 |
| b1836 | yebV | Isolate 2 | non-essential | predicted protein                                                                                                                | -1.54 |
| b1837 | yebW | Isolate 1 | non-essential | predicted protein                                                                                                                | 0.99  |
| b1837 | yebW | Isolate 2 | non-essential | predicted protein                                                                                                                | -0.88 |
| b1838 | pphA | Isolate 1 | non-essential | serine/threonine-specific protein phosphatase 1                                                                                  | 1.66  |
| b1838 | pphA | Isolate 2 | non-essential | serine/threonine-specific protein phosphatase 1                                                                                  | 0.27  |
| b1839 | yebY | Isolate 1 | non-essential | predicted protein                                                                                                                | 0.36  |
| b1839 | yebY | Isolate 2 | non-essential | predicted protein                                                                                                                | -0.71 |
| b1840 | yebZ | Isolate 1 | non-essential | predicted inner membrane protein                                                                                                 | -0.04 |
| b1840 | yebZ | Isolate 2 | non-essential | predicted inner membrane protein                                                                                                 | 0.32  |
| b1841 | yobA | Isolate 1 | non-essential | conserved protein                                                                                                                | 2.28  |
| b1841 | yobA | Isolate 2 | non-essential | conserved protein                                                                                                                | 1.97  |
| b1842 | holE | Isolate 1 | non-essential | DNA polymerase III, theta subunit                                                                                                | -0.05 |
| b1842 | holE | Isolate 2 | non-essential | DNA polymerase III, theta subunit                                                                                                | 0.39  |
| b1843 | yobB | Isolate 1 | non-essential | conserved protein                                                                                                                | 0.32  |
| b1843 | yobB | Isolate 2 | non-essential | conserved protein                                                                                                                | 0.37  |
| b1844 | exoX | Isolate 1 | non-essential | DNA exonuclease X                                                                                                                | -1.87 |
| b1844 | exoX | Isolate 2 | non-essential | DNA exonuclease X                                                                                                                | 0.14  |
| b1845 | ptrB | Isolate 1 | non-essential | protease II                                                                                                                      | 0.06  |
| b1845 | ptrB | Isolate 2 | non-essential | protease II                                                                                                                      | 0.69  |
| b1846 | yebE | Isolate 1 | non-essential | conserved protein                                                                                                                | 1.18  |
| b1846 | yebE | Isolate 2 | non-essential | conserved protein                                                                                                                | 0.84  |
| b1847 | yebF | Isolate 1 | non-essential | predicted protein                                                                                                                | 0.46  |
| b1847 | yebF | Isolate 2 | non-essential | predicted protein                                                                                                                | -0.59 |
| b1848 | yebG | Isolate 1 | non-essential | conserved protein regulated by LexA                                                                                              | -0.05 |
| b1848 | yebG | Isolate 2 | non-essential | conserved protein regulated by LexA                                                                                              | 0.84  |
| b1849 | purT | Isolate 1 | non-essential | phosphoribosylglycinamide formyltransferase 2                                                                                    | 0.28  |
| b1849 | purT | Isolate 2 | non-essential | phosphoribosylglycinamide formyltransferase 2                                                                                    | 0.87  |
| b1850 | eda  | Isolate 1 | non-essential | multifunctional 2-keto-3-deoxygluconate 6-phosphate aldolase -!- 2-keto-4-hydroxyglutarate aldolase -!- oxaloacetate decarboxyla | -0.28 |
| b1850 | eda  | Isolate 2 | non-essential | multifunctional 2-keto-3-deoxygluconate 6-phosphate aldolase -!- 2-keto-4-hydroxyglutarate aldolase -!- oxaloacetate decarboxyla | 2.25  |
| b1851 | edd  | Isolate 1 | non-essential | 6-phosphogluconate dehydratase                                                                                                   | -0.24 |
| b1851 | edd  | Isolate 2 | non-essential | 6-phosphogluconate dehydratase                                                                                                   | 0.06  |
| b1852 | zwf  | Isolate 1 | non-essential | glucose-6-phosphate dehydrogenase                                                                                                | 1.24  |
| b1852 | zwf  | Isolate 2 | non-essential | glucose-6-phosphate dehydrogenase                                                                                                | 0.27  |
| b1853 | yebK | Isolate 1 | non-essential | predicted DNA-binding transcriptional regulator                                                                                  | -0.12 |

|       |      |           |               |                                                                               |       |
|-------|------|-----------|---------------|-------------------------------------------------------------------------------|-------|
| b1853 | yebK | Isolate 2 | non-essential | predicted DNA-binding transcriptional regulator                               | 1.09  |
| b1854 | pykA | Isolate 1 | non-essential | pyruvate kinase II                                                            | 0.93  |
| b1854 | pykA | Isolate 2 | non-essential | pyruvate kinase II                                                            | 1.61  |
| b1855 | lpxM | Isolate 1 | non-essential | myristoyl-acyl carrier protein (ACP)-dependent acyltransferase                | 0.66  |
| b1855 | lpxM | Isolate 2 | non-essential | myristoyl-acyl carrier protein (ACP)-dependent acyltransferase                | -1.08 |
| b1856 | yebA | Isolate 1 | non-essential | predicted peptidase                                                           | -0.22 |
| b1856 | yebA | Isolate 2 | non-essential | predicted peptidase                                                           | -0.46 |
| b1857 | znuA | Isolate 1 | non-essential | zinc transporter subunit -!- periplasmic-binding component of ABC superfamily | 1.42  |
| b1857 | znuA | Isolate 2 | non-essential | zinc transporter subunit -!- periplasmic-binding component of ABC superfamily | 0.30  |
| b1858 | znuC | Isolate 1 | non-essential | zinc transporter subunit -!- ATP-binding component of ABC superfamily         | 0.68  |
| b1858 | znuC | Isolate 2 | non-essential | zinc transporter subunit -!- ATP-binding component of ABC superfamily         | 1.59  |
| b1859 | znuB | Isolate 1 | non-essential | zinc transporter subunit -!- membrane component of ABC superfamily            | 1.34  |
| b1859 | znuB | Isolate 2 | non-essential | zinc transporter subunit -!- membrane component of ABC superfamily            | 0.49  |
| b1860 | ruvB | Isolate 1 | non-essential | ATP-dependent DNA helicase, component of RuvABC resolvasome                   | 0.87  |
| b1860 | ruvB | Isolate 2 | non-essential | ATP-dependent DNA helicase, component of RuvABC resolvasome                   | 4.90  |
| b1861 | ruvA | Isolate 1 | non-essential | component of RuvABC resolvasome, regulatory subunit                           | 3.08  |
| b1861 | ruvA | Isolate 2 | non-essential | component of RuvABC resolvasome, regulatory subunit                           | 1.37  |
| b1862 | yebB | Isolate 1 | non-essential | predicted protein                                                             | -0.10 |
| b1862 | yebB | Isolate 2 | non-essential | predicted protein                                                             | -0.40 |
| b1863 | ruvC | Isolate 1 | non-essential | component of RuvABC resolvasome, endonuclease                                 | 2.23  |
| b1863 | ruvC | Isolate 2 | non-essential | component of RuvABC resolvasome, endonuclease                                 | 3.45  |
| b1864 | yebC | Isolate 1 | non-essential | conserved protein                                                             | -0.79 |
| b1864 | yebC | Isolate 2 | non-essential | conserved protein                                                             | 0.08  |
| b1865 | nudB | Isolate 1 | non-essential | dATP pyrophosphohydrolase                                                     | -0.10 |
| b1865 | nudB | Isolate 2 | non-essential | dATP pyrophosphohydrolase                                                     | 0.48  |
| b1866 | aspS | Isolate 1 | essential     | aspartyl-tRNA synthetase                                                      | 0.24  |
| b1867 | yecD | Isolate 1 | non-essential | predicted hydrolase                                                           | -3.12 |
| b1867 | yecD | Isolate 2 | non-essential | predicted hydrolase                                                           | 0.27  |
| b1868 | yecE | Isolate 1 | non-essential | conserved protein                                                             | -1.75 |
| b1868 | yecE | Isolate 2 | non-essential | conserved protein                                                             | -1.68 |
| b1869 | yecN | Isolate 1 | non-essential | predicted inner membrane protein                                              | -0.03 |
| b1869 | yecN | Isolate 2 | non-essential | predicted inner membrane protein                                              | 1.40  |
| b1870 | yecO | Isolate 1 | non-essential | predicted methyltransferase                                                   | 1.00  |
| b1870 | yecO | Isolate 2 | non-essential | predicted methyltransferase                                                   | -0.18 |
| b1871 | yecP | Isolate 1 | non-essential | predicted methyltransferase                                                   | 2.42  |
| b1871 | yecP | Isolate 2 | non-essential | predicted methyltransferase                                                   | -1.87 |
| b1872 | torZ | Isolate 1 | non-essential | trimethylamine N-oxide reductase system III, catalytic subunit                | 0.94  |
| b1872 | torZ | Isolate 2 | non-essential | trimethylamine N-oxide reductase system III, catalytic subunit                | 0.65  |
| b1873 | torY | Isolate 1 | non-essential | TMAO reductase III (TorYZ), cytochrome c-type subunit                         | -0.19 |
| b1873 | torY | Isolate 2 | non-essential | TMAO reductase III (TorYZ), cytochrome c-type subunit                         | 0.68  |
| b1874 | cutC | Isolate 1 | non-essential | copper homeostasis protein                                                    | 1.59  |
| b1874 | cutC | Isolate 2 | non-essential | copper homeostasis protein                                                    | 0.07  |
| b1875 | yecM | Isolate 1 | non-essential | predicted metal-binding enzyme                                                | -0.15 |

|       |      |           |               |                                                                                                               |        |
|-------|------|-----------|---------------|---------------------------------------------------------------------------------------------------------------|--------|
| b1875 | yecM | Isolate 2 | non-essential | predicted metal-binding enzyme                                                                                | -0.76  |
| b1877 | yecT | Isolate 1 | non-essential | predicted protein                                                                                             | 1.53   |
| b1877 | yecT | Isolate 2 | non-essential | predicted protein                                                                                             | 2.55   |
| b1878 | flhE | Isolate 1 | non-essential | flagellar protein                                                                                             | 0.15   |
| b1878 | flhE | Isolate 2 | non-essential | flagellar protein                                                                                             | -1.76  |
| b1879 | flhA | Isolate 1 | non-essential | predicted flagellar export pore protein                                                                       | 0.37   |
| b1879 | flhA | Isolate 2 | non-essential | predicted flagellar export pore protein                                                                       | -0.79  |
| b1880 | flhB | Isolate 1 | non-essential | predicted flagellar export pore protein                                                                       | -0.57  |
| b1880 | flhB | Isolate 2 | non-essential | predicted flagellar export pore protein                                                                       | -0.34  |
| b1881 | cheZ | Isolate 1 | non-essential | chemotaxis regulator                                                                                          | 0.69   |
| b1881 | cheZ | Isolate 2 | non-essential | chemotaxis regulator                                                                                          | 0.67   |
| b1882 | cheY | Isolate 1 | non-essential | chemotaxis regulator transmitting signal to flagellar motor component                                         | -10.03 |
| b1882 | cheY | Isolate 2 | non-essential | chemotaxis regulator transmitting signal to flagellar motor component                                         | 0.92   |
| b1883 | cheB | Isolate 1 | non-essential | fused chemotaxis regulator -!- protein-glutamate methylesterase, in two-component regulatory system with CheA | -0.62  |
| b1883 | cheB | Isolate 2 | non-essential | fused chemotaxis regulator -!- protein-glutamate methylesterase, in two-component regulatory system with CheA | 0.50   |
| b1884 | cheR | Isolate 1 | non-essential | chemotaxis regulator                                                                                          | 0.31   |
| b1884 | cheR | Isolate 2 | non-essential | chemotaxis regulator                                                                                          | 1.49   |
| b1885 | tap  | Isolate 1 | non-essential | methyl-accepting protein IV                                                                                   | -0.63  |
| b1885 | tap  | Isolate 2 | non-essential | methyl-accepting protein IV                                                                                   | -2.03  |
| b1886 | tar  | Isolate 1 | non-essential | methyl-accepting chemotaxis protein II                                                                        | 1.06   |
| b1886 | tar  | Isolate 2 | non-essential | methyl-accepting chemotaxis protein II                                                                        | 1.53   |
| b1887 | cheW | Isolate 1 | non-essential | purine-binding chemotaxis protein                                                                             | 0.63   |
| b1887 | cheW | Isolate 2 | non-essential | purine-binding chemotaxis protein                                                                             | -0.26  |
| b1888 | cheA | Isolate 1 | non-essential | fused chemotactic sensory histidine kinase (soluble) in two-component regulatory system with CheB and CheY    | -11.56 |
| b1888 | cheA | Isolate 2 | non-essential | fused chemotactic sensory histidine kinase (soluble) in two-component regulatory system with CheB and CheY    | 0.12   |
| b1889 | motB | Isolate 1 | non-essential | protein that enables flagellar motor rotation                                                                 | 0.09   |
| b1889 | motB | Isolate 2 | non-essential | protein that enables flagellar motor rotation                                                                 | -0.11  |
| b1890 | motA | Isolate 1 | non-essential | proton conductor component of flagella motor                                                                  | 0.21   |
| b1890 | motA | Isolate 2 | non-essential | proton conductor component of flagella motor                                                                  | 0.11   |
| b1891 | flhC | Isolate 1 | non-essential | DNA-binding transcriptional regulator with FlhD                                                               | 0.44   |
| b1891 | flhC | Isolate 2 | non-essential | DNA-binding transcriptional regulator with FlhD                                                               | 1.35   |
| b1892 | flhD | Isolate 1 | non-essential | DNA-binding transcriptional dual regulator with FlhC                                                          | 1.47   |
| b1892 | flhD | Isolate 2 | non-essential | DNA-binding transcriptional dual regulator with FlhC                                                          | -0.42  |
| b1895 | yecG | Isolate 1 | non-essential | universal stress protein                                                                                      | 0.53   |
| b1895 | yecG | Isolate 2 | non-essential | universal stress protein                                                                                      | 1.00   |
| b1896 | otsA | Isolate 1 | non-essential | trehalose-6-phosphate synthase                                                                                | -0.09  |
| b1896 | otsA | Isolate 2 | non-essential | trehalose-6-phosphate synthase                                                                                | 0.91   |
| b1897 | otsB | Isolate 1 | non-essential | trehalose-6-phosphate phosphatase, biosynthetic                                                               | 0.14   |
| b1897 | otsB | Isolate 2 | non-essential | trehalose-6-phosphate phosphatase, biosynthetic                                                               | -0.80  |
| b1900 | araG | Isolate 1 | non-essential | fused L-arabinose transporter subunits -!- ATP-binding components of ABC superfamily                          | 0.86   |
| b1900 | araG | Isolate 2 | non-essential | fused L-arabinose transporter subunits -!- ATP-binding components of ABC superfamily                          | -1.19  |
| b1901 | araF | Isolate 1 | non-essential | L-arabinose transporter subunit -!- periplasmic-binding component of ABC superfamily                          | -0.36  |
| b1901 | araF | Isolate 2 | non-essential | L-arabinose transporter subunit -!- periplasmic-binding component of ABC superfamily                          | -1.85  |



|       |      |           |               |                                                                                  |       |
|-------|------|-----------|---------------|----------------------------------------------------------------------------------|-------|
| b1902 | yecI | Isolate 1 | non-essential | predicted ferritin-like protein                                                  | 0.91  |
| b1902 | yecI | Isolate 2 | non-essential | predicted ferritin-like protein                                                  | 1.71  |
| b1904 | yecR | Isolate 1 | non-essential | predicted protein                                                                | -0.18 |
| b1904 | yecR | Isolate 2 | non-essential | predicted protein                                                                | -0.65 |
| b1905 | ftn  | Isolate 1 | non-essential | ferritin iron storage protein (cytoplasmic)                                      | -0.67 |
| b1905 | ftn  | Isolate 2 | non-essential | ferritin iron storage protein (cytoplasmic)                                      | -1.47 |
| b1906 | yecH | Isolate 1 | non-essential | predicted protein                                                                | -0.41 |
| b1906 | yecH | Isolate 2 | non-essential | predicted protein                                                                | 1.86  |
| b1907 | tyrP | Isolate 1 | non-essential | tyrosine transporter                                                             | -0.29 |
| b1907 | tyrP | Isolate 2 | non-essential | tyrosine transporter                                                             | -0.48 |
| b1908 | yecA | Isolate 1 | non-essential | conserved metal-binding protein                                                  | -1.45 |
| b1908 | yecA | Isolate 2 | non-essential | conserved metal-binding protein                                                  | -2.21 |
| b1913 | uvrC | Isolate 1 | non-essential | excinuclease UvrABC, endonuclease subunit                                        | -0.46 |
| b1913 | uvrC | Isolate 2 | non-essential | excinuclease UvrABC, endonuclease subunit                                        | 1.39  |
| b1914 | uvrY | Isolate 1 | non-essential | DNA-binding response regulator in two-component regulatory system with BarA      | -0.12 |
| b1914 | uvrY | Isolate 2 | non-essential | DNA-binding response regulator in two-component regulatory system with BarA      | -0.01 |
| b1915 | yecF | Isolate 1 | non-essential | predicted protein                                                                | 0.00  |
| b1915 | yecF | Isolate 2 | non-essential | predicted protein                                                                | -1.34 |
| b1916 | sdiA | Isolate 1 | non-essential | DNA-binding transcriptional activator                                            | 0.90  |
| b1916 | sdiA | Isolate 2 | non-essential | DNA-binding transcriptional activator                                            | -0.89 |
| b1917 | yecC | Isolate 1 | non-essential | predicted transporter subunit -!- ATP-binding component of ABC superfamily       | -0.28 |
| b1917 | yecC | Isolate 2 | non-essential | predicted transporter subunit -!- ATP-binding component of ABC superfamily       | 2.79  |
| b1918 | yecS | Isolate 1 | non-essential | predicted transporter subunit -!- membrane component of ABC superfamily          | 2.86  |
| b1918 | yecS | Isolate 2 | non-essential | predicted transporter subunit -!- membrane component of ABC superfamily          | -0.85 |
| b1919 | yedO | Isolate 1 | non-essential | D-cysteine desulphydrase, PLP-dependent                                          | 1.25  |
| b1919 | yedO | Isolate 2 | non-essential | D-cysteine desulphydrase, PLP-dependent                                          | 1.74  |
| b1920 | fliY | Isolate 1 | non-essential | cystine transporter subunit -!- periplasmic-binding component of ABC superfamily | 1.04  |
| b1920 | fliY | Isolate 2 | non-essential | cystine transporter subunit -!- periplasmic-binding component of ABC superfamily | 1.20  |
| b1921 | fliZ | Isolate 1 | non-essential | predicted regulator of FliA activity                                             | 1.22  |
| b1921 | fliZ | Isolate 2 | non-essential | predicted regulator of FliA activity                                             | 0.72  |
| b1922 | fliA | Isolate 1 | non-essential | RNA polymerase, sigma 28 (sigma F) factor                                        | -0.29 |
| b1922 | fliA | Isolate 2 | non-essential | RNA polymerase, sigma 28 (sigma F) factor                                        | 2.97  |
| b1923 | fliC | Isolate 1 | non-essential | flagellar filament structural protein (flagellin)                                | 1.40  |
| b1923 | fliC | Isolate 2 | non-essential | flagellar filament structural protein (flagellin)                                | 0.06  |
| b1924 | fliD | Isolate 1 | non-essential | flagellar filament capping protein                                               | -0.99 |
| b1924 | fliD | Isolate 2 | non-essential | flagellar filament capping protein                                               | -0.27 |
| b1925 | fliS | Isolate 1 | non-essential | flagellar protein potentiates polymerization                                     | -0.32 |
| b1925 | fliS | Isolate 2 | non-essential | flagellar protein potentiates polymerization                                     | 1.79  |
| b1926 | fliT | Isolate 1 | non-essential | predicted chaperone                                                              | 1.49  |
| b1926 | fliT | Isolate 2 | non-essential | predicted chaperone                                                              | 1.32  |
| b1927 | amyA | Isolate 1 | non-essential | cytoplasmic alpha-amylase                                                        | -0.37 |
| b1927 | amyA | Isolate 2 | non-essential | cytoplasmic alpha-amylase                                                        | 0.63  |
| b1928 | yedD | Isolate 1 | non-essential | predicted protein                                                                | 0.71  |

|       |      |           |               |                                                    |       |
|-------|------|-----------|---------------|----------------------------------------------------|-------|
| b1928 | yedD | Isolate 2 | non-essential | predicted protein                                  | -1.48 |
| b1929 | yedE | Isolate 1 | non-essential | predicted inner membrane protein                   | -1.09 |
| b1929 | yedE | Isolate 2 | non-essential | predicted inner membrane protein                   | -0.91 |
| b1930 | yedF | Isolate 1 | non-essential | conserved protein                                  | -0.17 |
| b1930 | yedF | Isolate 2 | non-essential | conserved protein                                  | 1.04  |
| b1931 | yedK | Isolate 1 | non-essential | predicted protein                                  | 3.58  |
| b1931 | yedK | Isolate 2 | non-essential | predicted protein                                  | 1.21  |
| b1932 | yedL | Isolate 1 | non-essential | predicted acyltransferase                          | -0.52 |
| b1932 | yedL | Isolate 2 | non-essential | predicted acyltransferase                          | -0.97 |
| b1933 | yedN | Isolate 1 | *             | predicted protein, N-ter fragment (pseudogene)     | 0.19  |
| b1933 | yedN | Isolate 2 | *             | predicted protein, N-ter fragment (pseudogene)     | 1.73  |
| b1935 | yedM | Isolate 1 | non-essential | conserved protein                                  | -1.38 |
| b1935 | yedM | Isolate 2 | non-essential | conserved protein                                  | 1.35  |
| b1936 | intG | Isolate 1 | *             | predicted defective phage integrase (pseudogene)   | -0.15 |
| b1936 | intG | Isolate 2 | *             | predicted defective phage integrase (pseudogene)   | -0.69 |
| b1937 | fliE | Isolate 1 | non-essential | flagellar basal-body component                     | -0.84 |
| b1937 | fliE | Isolate 2 | non-essential | flagellar basal-body component                     | -0.17 |
| b1938 | fliF | Isolate 1 | non-essential | flagellar basal-body MS-ring and collar protein    | 0.09  |
| b1938 | fliF | Isolate 2 | non-essential | flagellar basal-body MS-ring and collar protein    | 0.88  |
| b1939 | fliG | Isolate 1 | non-essential | flagellar motor switching and energizing component | 0.07  |
| b1939 | fliG | Isolate 2 | non-essential | flagellar motor switching and energizing component | -0.22 |
| b1940 | fliH | Isolate 1 | non-essential | flagellar biosynthesis protein                     | 0.35  |
| b1940 | fliH | Isolate 2 | non-essential | flagellar biosynthesis protein                     | -1.34 |
| b1941 | fliI | Isolate 1 | non-essential | flagellum-specific ATP synthase                    | 0.53  |
| b1941 | fliI | Isolate 2 | non-essential | flagellum-specific ATP synthase                    | -0.67 |
| b1942 | fliJ | Isolate 1 | non-essential | flagellar protein                                  | -2.42 |
| b1942 | fliJ | Isolate 2 | non-essential | flagellar protein                                  | -0.57 |
| b1943 | fliK | Isolate 1 | non-essential | flagellar hook-length control protein              | -1.08 |
| b1943 | fliK | Isolate 2 | non-essential | flagellar hook-length control protein              | 0.58  |
| b1944 | fliL | Isolate 1 | non-essential | flagellar biosynthesis protein                     | -1.16 |
| b1944 | fliL | Isolate 2 | non-essential | flagellar biosynthesis protein                     | -0.94 |
| b1945 | fliM | Isolate 1 | non-essential | flagellar motor switching and energizing component | -1.34 |
| b1945 | fliM | Isolate 2 | non-essential | flagellar motor switching and energizing component | -1.77 |
| b1946 | fliN | Isolate 1 | non-essential | flagellar motor switching and energizing component | 0.60  |
| b1946 | fliN | Isolate 2 | non-essential | flagellar motor switching and energizing component | 1.22  |
| b1947 | fliO | Isolate 1 | non-essential | flagellar biosynthesis protein                     | 5.26  |
| b1947 | fliO | Isolate 2 | non-essential | flagellar biosynthesis protein                     | 2.94  |
| b1948 | fliP | Isolate 1 | non-essential | flagellar biosynthesis protein                     | -0.43 |
| b1948 | fliP | Isolate 2 | non-essential | flagellar biosynthesis protein                     | 0.20  |
| b1949 | fliQ | Isolate 1 | non-essential | flagellar biosynthesis protein                     | 1.29  |
| b1949 | fliQ | Isolate 2 | non-essential | flagellar biosynthesis protein                     | 2.27  |
| b1950 | fliR | Isolate 1 | non-essential | flagellar export pore protein                      | 0.57  |
| b1950 | fliR | Isolate 2 | non-essential | flagellar export pore protein                      | -0.49 |

|       |      |           |               |                                                                            |        |
|-------|------|-----------|---------------|----------------------------------------------------------------------------|--------|
| b1951 | rcsA | Isolate 1 | non-essential | DNA-binding transcriptional co-regulator with RcsB                         | -0.42  |
| b1951 | rcsA | Isolate 2 | non-essential | DNA-binding transcriptional co-regulator with RcsB                         | 0.41   |
| b1952 | dsrB | Isolate 1 | non-essential | predicted protein                                                          | -0.72  |
| b1952 | dsrB | Isolate 2 | non-essential | predicted protein                                                          | 0.81   |
| b1953 | yodD | Isolate 1 | non-essential | predicted protein                                                          | -1.50  |
| b1953 | yodD | Isolate 2 | non-essential | predicted protein                                                          | -1.31  |
| b1955 | yedP | Isolate 1 | non-essential | conserved protein                                                          | -0.44  |
| b1955 | yedP | Isolate 2 | non-essential | conserved protein                                                          | -0.65  |
| b1956 | yedQ | Isolate 1 | non-essential | predicted diguanylate cyclase                                              | 0.54   |
| b1956 | yedQ | Isolate 2 | non-essential | predicted diguanylate cyclase                                              | 1.19   |
| b1957 | yodC | Isolate 1 | non-essential | predicted protein                                                          | -1.83  |
| b1957 | yodC | Isolate 2 | non-essential | predicted protein                                                          | 1.78   |
| b1958 | yedI | Isolate 1 | non-essential | conserved inner membrane protein                                           | -0.61  |
| b1958 | yedI | Isolate 2 | non-essential | conserved inner membrane protein                                           | -0.47  |
| b1959 | yedA | Isolate 1 | non-essential | predicted inner membrane protein                                           | -0.90  |
| b1959 | yedA | Isolate 2 | non-essential | predicted inner membrane protein                                           | -1.21  |
| b1960 | vsr  | Isolate 1 | non-essential | DNA mismatch endonuclease of very short patch repair                       | -0.09  |
| b1960 | vsr  | Isolate 2 | non-essential | DNA mismatch endonuclease of very short patch repair                       | 0.19   |
| b1961 | dcm  | Isolate 1 | non-essential | DNA cytosine methylase                                                     | 0.06   |
| b1961 | dcm  | Isolate 2 | non-essential | DNA cytosine methylase                                                     | -0.57  |
| b1962 | yedJ | Isolate 1 | non-essential | predicted phosphohydrolase                                                 | 0.17   |
| b1962 | yedJ | Isolate 2 | non-essential | predicted phosphohydrolase                                                 | 0.66   |
| b1963 | yedR | Isolate 1 | non-essential | predicted inner membrane protein                                           | 0.33   |
| b1963 | yedR | Isolate 2 | non-essential | predicted inner membrane protein                                           | -1.74  |
| b1965 | yedS | Isolate 1 | *             | predicted protein, middle fragment (pseudogene)                            | -1.21  |
| b1965 | yedS | Isolate 2 | *             | predicted protein, middle fragment (pseudogene)                            | -0.54  |
| b1966 | yedS | Isolate 1 | *             | predicted protein, C-ter fragment (pseudogene)                             | -0.78  |
| b1966 | yedS | Isolate 2 | *             | predicted protein, C-ter fragment (pseudogene)                             | -0.39  |
| b1967 | hchA | Isolate 1 | non-essential | Hsp31 molecular chaperone                                                  | -0.02  |
| b1967 | hchA | Isolate 2 | non-essential | Hsp31 molecular chaperone                                                  | -0.05  |
| b1968 | yedV | Isolate 1 | non-essential | predicted sensory kinase in two-component regulatory system with YedW      | -0.82  |
| b1968 | yedV | Isolate 2 | non-essential | predicted sensory kinase in two-component regulatory system with YedW      | 0.04   |
| b1969 | yedW | Isolate 1 | non-essential | predicted DNA-binding response regulator in two-component system with YedV | 0.73   |
| b1969 | yedW | Isolate 2 | non-essential | predicted DNA-binding response regulator in two-component system with YedV | 1.32   |
| b1970 | yedX | Isolate 1 | non-essential | conserved protein                                                          | -0.55  |
| b1970 | yedX | Isolate 2 | non-essential | conserved protein                                                          | 0.19   |
| b1971 | yedY | Isolate 1 | non-essential | predicted reductase                                                        | -0.38  |
| b1971 | yedY | Isolate 2 | non-essential | predicted reductase                                                        | 0.68   |
| b1972 | yedZ | Isolate 1 | non-essential | conserved inner membrane protein                                           | 0.12   |
| b1972 | yedZ | Isolate 2 | non-essential | conserved inner membrane protein                                           | -1.01  |
| b1973 | yodA | Isolate 1 | non-essential | conserved metal-binding protein                                            | 0.72   |
| b1973 | yodA | Isolate 2 | non-essential | conserved metal-binding protein                                            | -12.22 |
| b1974 | yodB | Isolate 1 | non-essential | predicted cytochrome                                                       | -0.54  |

|       |      |           |               |                                                                                     |       |
|-------|------|-----------|---------------|-------------------------------------------------------------------------------------|-------|
| b1974 | yodB | Isolate 2 | non-essential | predicted cytochrome                                                                | -0.85 |
| b1976 | yeeI | Isolate 1 | non-essential | conserved protein                                                                   | 0.10  |
| b1976 | yeeI | Isolate 2 | non-essential | conserved protein                                                                   | 1.33  |
| b1978 | yeeJ | Isolate 1 | non-essential | adhesin                                                                             | -1.59 |
| b1978 | yeeJ | Isolate 2 | non-essential | adhesin                                                                             | -0.15 |
| b1979 | yeeL | Isolate 1 | *             | predicted protein, C-ter fragment (pseudogene)                                      | 0.08  |
| b1979 | yeeL | Isolate 2 | *             | predicted protein, C-ter fragment (pseudogene)                                      | 0.06  |
| b1981 | shiA | Isolate 1 | non-essential | shikimate transporter                                                               | 3.52  |
| b1981 | shiA | Isolate 2 | non-essential | shikimate transporter                                                               | 0.68  |
| b1982 | amn  | Isolate 1 | non-essential | AMP nucleosidase                                                                    | 0.97  |
| b1982 | amn  | Isolate 2 | non-essential | AMP nucleosidase                                                                    | 0.96  |
| b1983 | yeeN | Isolate 1 | non-essential | conserved protein                                                                   | 0.65  |
| b1983 | yeeN | Isolate 2 | non-essential | conserved protein                                                                   | 0.42  |
| b1985 | yeeO | Isolate 1 | non-essential | predicted multidrug efflux system                                                   | -0.63 |
| b1985 | yeeO | Isolate 2 | non-essential | predicted multidrug efflux system                                                   | 0.19  |
| b1987 | cbl  | Isolate 1 | non-essential | DNA-binding transcriptional activator                                               | 0.44  |
| b1987 | cbl  | Isolate 2 | non-essential | DNA-binding transcriptional activator                                               | 1.18  |
| b1988 | nac  | Isolate 1 | non-essential | DNA-binding transcriptional dual regulator                                          | 0.91  |
| b1988 | nac  | Isolate 2 | non-essential | DNA-binding transcriptional dual regulator                                          | 0.07  |
| b1990 | erfK | Isolate 1 | non-essential | conserved protein with NAD(P)-binding Rossmann-fold domain                          | 1.03  |
| b1990 | erfK | Isolate 2 | non-essential | conserved protein with NAD(P)-binding Rossmann-fold domain                          | 0.48  |
| b1991 | cobT | Isolate 1 | non-essential | nicotinate-nucleotide dimethylbenzimidazole-P phosphoribosyl transferase            | -0.28 |
| b1991 | cobT | Isolate 2 | non-essential | nicotinate-nucleotide dimethylbenzimidazole-P phosphoribosyl transferase            | 3.19  |
| b1992 | cobS | Isolate 1 | non-essential | cobalamin 5'-phosphate synthase                                                     | 1.70  |
| b1992 | cobS | Isolate 2 | non-essential | cobalamin 5'-phosphate synthase                                                     | -1.31 |
| b1993 | cobU | Isolate 1 | non-essential | bifunctional cobinamide kinase -!- cobinamide phosphate guanylyltransferase         | 0.24  |
| b1993 | cobU | Isolate 2 | non-essential | bifunctional cobinamide kinase -!- cobinamide phosphate guanylyltransferase         | 3.07  |
| b1995 | yoeA | Isolate 1 | *             | CP4-44 prophage; predicted disrupted hemin or colicin receptor (pseudogene)         | 0.71  |
| b1995 | yoeA | Isolate 2 | *             | CP4-44 prophage; predicted disrupted hemin or colicin receptor (pseudogene)         | 0.62  |
| b1998 | yoeE | Isolate 1 | non-essential | CP4-44 prophage; predicted disrupted hemin or colicin receptor                      | 0.60  |
| b1998 | yoeE | Isolate 2 | non-essential | CP4-44 prophage; predicted disrupted hemin or colicin receptor                      | 1.93  |
| b1999 | yeeP | Isolate 1 | *             | CP4-44 prophage; predicted GTP-binding protein (pseudogene)                         | 1.26  |
| b1999 | yeeP | Isolate 2 | *             | CP4-44 prophage; predicted GTP-binding protein (pseudogene)                         | 0.17  |
| b2000 | flu  | Isolate 1 | non-essential | CP4-44 prophage; antigen 43 (Ag43) phase-variable biofilm formation autotransporter | -0.16 |
| b2000 | flu  | Isolate 2 | non-essential | CP4-44 prophage; antigen 43 (Ag43) phase-variable biofilm formation autotransporter | -0.59 |
| b2001 | yeeR | Isolate 1 | non-essential | CP4-44 prophage; predicted membrane protein                                         | -1.34 |
| b2001 | yeeR | Isolate 2 | non-essential | CP4-44 prophage; predicted membrane protein                                         | 0.18  |
| b2002 | yeeS | Isolate 1 | non-essential | CP4-44 prophage; predicted DNA repair protein                                       | 2.58  |
| b2002 | yeeS | Isolate 2 | non-essential | CP4-44 prophage; predicted DNA repair protein                                       | -0.21 |
| b2003 | yeeT | Isolate 1 | non-essential | CP4-44 prophage; predicted protein                                                  | -1.51 |
| b2003 | yeeT | Isolate 2 | non-essential | CP4-44 prophage; predicted protein                                                  | -0.23 |
| b2004 | yeeU | Isolate 1 | non-essential | CP4-44 prophage; antitoxin of the YeeV-YeeU toxin-antitoxin system                  | -1.25 |
| b2004 | yeeU | Isolate 2 | non-essential | CP4-44 prophage; antitoxin of the YeeV-YeeU toxin-antitoxin system                  | -2.37 |

|       |      |           |               |                                                                                                   |       |
|-------|------|-----------|---------------|---------------------------------------------------------------------------------------------------|-------|
| b2005 | yeeV | Isolate 1 | non-essential | CP4-44 prophage; toxin of the YeeV-YeeU toxin-antitoxin system                                    | 0.59  |
| b2005 | yeeV | Isolate 2 | non-essential | CP4-44 prophage; toxin of the YeeV-YeeU toxin-antitoxin system                                    | -0.45 |
| b2006 | yeeW | Isolate 1 | non-essential | CP4-44 prophage; predicted protein                                                                | 1.83  |
| b2006 | yeeW | Isolate 2 | non-essential | CP4-44 prophage; predicted protein                                                                | 0.21  |
| b2007 | yeeX | Isolate 1 | non-essential | conserved protein                                                                                 | -0.17 |
| b2007 | yeeX | Isolate 2 | non-essential | conserved protein                                                                                 | -2.21 |
| b2008 | yeeA | Isolate 1 | non-essential | conserved inner membrane protein                                                                  | 0.71  |
| b2008 | yeeA | Isolate 2 | non-essential | conserved inner membrane protein                                                                  | 2.77  |
| b2009 | sbmC | Isolate 1 | non-essential | DNA gyrase inhibitor                                                                              | 0.65  |
| b2009 | sbmC | Isolate 2 | non-essential | DNA gyrase inhibitor                                                                              | 0.31  |
| b2010 | dacD | Isolate 1 | non-essential | D-alanyl-D-alanine carboxypeptidase (penicillin-binding protein 6b)                               | 1.56  |
| b2010 | dacD | Isolate 2 | non-essential | D-alanyl-D-alanine carboxypeptidase (penicillin-binding protein 6b)                               | 1.19  |
| b2011 | sbcB | Isolate 1 | non-essential | exonuclease I                                                                                     | 0.16  |
| b2011 | sbcB | Isolate 2 | non-essential | exonuclease I                                                                                     | 0.56  |
| b2012 | yeeD | Isolate 1 | non-essential | conserved protein                                                                                 | 3.08  |
| b2012 | yeeD | Isolate 2 | non-essential | conserved protein                                                                                 | 0.80  |
| b2013 | yeeE | Isolate 1 | non-essential | predicted inner membrane protein                                                                  | -0.25 |
| b2013 | yeeE | Isolate 2 | non-essential | predicted inner membrane protein                                                                  | 0.65  |
| b2014 | yeeF | Isolate 1 | non-essential | predicted amino-acid transporter                                                                  | 0.82  |
| b2014 | yeeF | Isolate 2 | non-essential | predicted amino-acid transporter                                                                  | 2.16  |
| b2015 | yeeY | Isolate 1 | non-essential | predicted DNA-binding transcriptional regulator                                                   | 1.99  |
| b2015 | yeeY | Isolate 2 | non-essential | predicted DNA-binding transcriptional regulator                                                   | 0.67  |
| b2016 | yeeZ | Isolate 1 | non-essential | predicted epimerase, with NAD(P)-binding Rossmann-fold domain                                     | -0.73 |
| b2016 | yeeZ | Isolate 2 | non-essential | predicted epimerase, with NAD(P)-binding Rossmann-fold domain                                     | 0.60  |
| b2017 | yefM | Isolate 1 | essential     | antitoxin of the YoeB-YefM toxin-antitoxin system                                                 | -4.14 |
| b2018 | hisL | Isolate 1 | non-essential | his operon leader peptide                                                                         | -1.01 |
| b2018 | hisL | Isolate 2 | non-essential | his operon leader peptide                                                                         | -2.82 |
| b2019 | hisG | Isolate 1 | non-essential | ATP phosphoribosyltransferase                                                                     | 1.82  |
| b2019 | hisG | Isolate 2 | non-essential | ATP phosphoribosyltransferase                                                                     | 0.86  |
| b2020 | hisD | Isolate 1 | non-essential | bifunctional histidinal dehydrogenase -!- histidinol dehydrogenase                                | 0.48  |
| b2020 | hisD | Isolate 2 | non-essential | bifunctional histidinal dehydrogenase -!- histidinol dehydrogenase                                | 2.78  |
| b2021 | hisC | Isolate 1 | non-essential | histidinol-phosphate aminotransferase                                                             | 3.82  |
| b2021 | hisC | Isolate 2 | non-essential | histidinol-phosphate aminotransferase                                                             | 1.15  |
| b2022 | hisB | Isolate 1 | non-essential | fused histidinol-phosphatase -!- imidazoleglycerol-phosphate dehydratase                          | 1.11  |
| b2022 | hisB | Isolate 2 | non-essential | fused histidinol-phosphatase -!- imidazoleglycerol-phosphate dehydratase                          | 1.65  |
| b2023 | hisH | Isolate 1 | non-essential | imidazole glycerol phosphate synthase, glutamine amidotransferase subunit                         | 0.86  |
| b2023 | hisH | Isolate 2 | non-essential | imidazole glycerol phosphate synthase, glutamine amidotransferase subunit                         | 0.14  |
| b2024 | hisA | Isolate 1 | non-essential | N-(5'-phospho-L-ribosyl-formimino)-5-amino-1-(5'-phosphoribosyl)-4-imidazolecarboxamide isomerase | 2.85  |
| b2024 | hisA | Isolate 2 | non-essential | N-(5'-phospho-L-ribosyl-formimino)-5-amino-1-(5'-phosphoribosyl)-4-imidazolecarboxamide isomerase | 3.54  |
| b2025 | hisF | Isolate 1 | non-essential | imidazole glycerol phosphate synthase, catalytic subunit with HisF                                | 2.18  |
| b2025 | hisF | Isolate 2 | non-essential | imidazole glycerol phosphate synthase, catalytic subunit with HisF                                | -2.02 |
| b2026 | hisI | Isolate 1 | non-essential | fused phosphoribosyl-AMP cyclohydrolase -!- phosphoribosyl-ATP pyrophosphatase                    | 0.33  |
| b2026 | hisI | Isolate 2 | non-essential | fused phosphoribosyl-AMP cyclohydrolase -!- phosphoribosyl-ATP pyrophosphatase                    | -1.75 |

|       |      |           |               |                                                                                       |       |
|-------|------|-----------|---------------|---------------------------------------------------------------------------------------|-------|
| b2027 | cld  | Isolate 1 | non-essential | regulator of length of O-antigen component of lipopolysaccharide chains               | 1.34  |
| b2027 | cld  | Isolate 2 | non-essential | regulator of length of O-antigen component of lipopolysaccharide chains               | 0.71  |
| b2028 | ugd  | Isolate 1 | non-essential | UDP-glucose 6-dehydrogenase                                                           | 0.07  |
| b2028 | ugd  | Isolate 2 | non-essential | UDP-glucose 6-dehydrogenase                                                           | 1.35  |
| b2029 | gnd  | Isolate 1 | non-essential | gluconate-6-phosphate dehydrogenase, decarboxylating                                  | 2.62  |
| b2029 | gnd  | Isolate 2 | non-essential | gluconate-6-phosphate dehydrogenase, decarboxylating                                  | 1.43  |
| b2031 | wbbL | Isolate 1 | *             | lipopolysaccharide biosynthesis protein, N-ter fragment (pseudogene)                  | 1.06  |
| b2031 | wbbL | Isolate 2 | *             | lipopolysaccharide biosynthesis protein, N-ter fragment (pseudogene)                  | 3.61  |
| b2032 | wbbK | Isolate 1 | non-essential | lipopolysaccharide biosynthesis protein                                               | -0.09 |
| b2032 | wbbK | Isolate 2 | non-essential | lipopolysaccharide biosynthesis protein                                               | 1.74  |
| b2033 | wbbJ | Isolate 1 | non-essential | predicted acyl transferase                                                            | -0.79 |
| b2033 | wbbJ | Isolate 2 | non-essential | predicted acyl transferase                                                            | -0.11 |
| b2034 | wbbI | Isolate 1 | non-essential | conserved protein                                                                     | 0.32  |
| b2034 | wbbI | Isolate 2 | non-essential | conserved protein                                                                     | -0.95 |
| b2035 | wbbH | Isolate 1 | non-essential | O-antigen polymerase                                                                  | -1.80 |
| b2035 | wbbH | Isolate 2 | non-essential | O-antigen polymerase                                                                  | -0.02 |
| b2036 | glf  | Isolate 1 | non-essential | UDP-galactopyranose mutase, FAD/NAD(P)-binding                                        | -1.05 |
| b2036 | glf  | Isolate 2 | non-essential | UDP-galactopyranose mutase, FAD/NAD(P)-binding                                        | -0.78 |
| b2037 | rfbX | Isolate 1 | non-essential | predicted polisoprenol-linked O-antigen transporter                                   | 0.40  |
| b2037 | rfbX | Isolate 2 | non-essential | predicted polisoprenol-linked O-antigen transporter                                   | 0.15  |
| b2038 | rfbC | Isolate 1 | non-essential | dTDP-4-deoxyrhamnose-3,5-epimerase                                                    | -0.65 |
| b2038 | rfbC | Isolate 2 | non-essential | dTDP-4-deoxyrhamnose-3,5-epimerase                                                    | 0.45  |
| b2039 | rfbA | Isolate 1 | non-essential | glucose-1-phosphate thymidyltransferase                                               | 1.86  |
| b2039 | rfbA | Isolate 2 | non-essential | glucose-1-phosphate thymidyltransferase                                               | 1.55  |
| b2040 | rfbD | Isolate 1 | non-essential | dTDP-4-dehydrorhamnose reductase subunit, NAD(P)-binding, of dTDP-L-rhamnose synthase | 0.29  |
| b2040 | rfbD | Isolate 2 | non-essential | dTDP-4-dehydrorhamnose reductase subunit, NAD(P)-binding, of dTDP-L-rhamnose synthase | 2.70  |
| b2041 | rfbB | Isolate 1 | non-essential | dTDP-glucose 4,6 dehydratase, NAD(P)-binding                                          | -0.75 |
| b2041 | rfbB | Isolate 2 | non-essential | dTDP-glucose 4,6 dehydratase, NAD(P)-binding                                          | 0.34  |
| b2042 | galF | Isolate 1 | non-essential | predicted subunit with GalU                                                           | 0.65  |
| b2042 | galF | Isolate 2 | non-essential | predicted subunit with GalU                                                           | 0.94  |
| b2043 | wcaM | Isolate 1 | non-essential | predicted colanic acid biosynthesis protein                                           | 1.22  |
| b2043 | wcaM | Isolate 2 | non-essential | predicted colanic acid biosynthesis protein                                           | 0.23  |
| b2044 | wcaL | Isolate 1 | non-essential | predicted glycosyl transferase                                                        | 0.06  |
| b2044 | wcaL | Isolate 2 | non-essential | predicted glycosyl transferase                                                        | 2.12  |
| b2045 | wcaK | Isolate 1 | non-essential | predicted pyruvyl transferase                                                         | 0.39  |
| b2045 | wcaK | Isolate 2 | non-essential | predicted pyruvyl transferase                                                         | 0.36  |
| b2046 | wzxC | Isolate 1 | non-essential | colanic acid exporter                                                                 | -1.56 |
| b2046 | wzxC | Isolate 2 | non-essential | colanic acid exporter                                                                 | 2.96  |
| b2047 | wcaJ | Isolate 1 | non-essential | predicted UDP-glucose lipid carrier transferase                                       | 0.53  |
| b2047 | wcaJ | Isolate 2 | non-essential | predicted UDP-glucose lipid carrier transferase                                       | 0.81  |
| b2048 | cpsG | Isolate 1 | non-essential | phosphomannomutase                                                                    | 1.02  |
| b2048 | cpsG | Isolate 2 | non-essential | phosphomannomutase                                                                    | -1.88 |
| b2049 | cpsB | Isolate 1 | non-essential | mannose-1-phosphate guanyltransferase                                                 | 1.22  |

|       |      |           |               |                                                                                                                        |       |
|-------|------|-----------|---------------|------------------------------------------------------------------------------------------------------------------------|-------|
| b2049 | cpsB | Isolate 2 | non-essential | mannose-1-phosphate guanyltransferase                                                                                  | -0.72 |
| b2050 | wcaI | Isolate 1 | non-essential | predicted glycosyl transferase                                                                                         | -0.41 |
| b2050 | wcaI | Isolate 2 | non-essential | predicted glycosyl transferase                                                                                         | 2.15  |
| b2051 | nudD | Isolate 1 | non-essential | GDP-mannose mannosyl hydrolase                                                                                         | 0.19  |
| b2051 | nudD | Isolate 2 | non-essential | GDP-mannose mannosyl hydrolase                                                                                         | 0.15  |
| b2052 | fcl  | Isolate 1 | non-essential | bifunctional GDP-fucose synthetase: GDP-4-dehydro-6-deoxy-D-mannose epimerase and GDP-4-dehydro-6-L-deoxygalactose red | -0.79 |
| b2052 | fcl  | Isolate 2 | non-essential | bifunctional GDP-fucose synthetase: GDP-4-dehydro-6-deoxy-D-mannose epimerase and GDP-4-dehydro-6-L-deoxygalactose red | -1.74 |
| b2053 | gmd  | Isolate 1 | non-essential | GDP-D-mannose dehydratase, NAD(P)-binding                                                                              | 0.16  |
| b2053 | gmd  | Isolate 2 | non-essential | GDP-D-mannose dehydratase, NAD(P)-binding                                                                              | -0.36 |
| b2054 | wcaF | Isolate 1 | non-essential | predicted acyl transferase                                                                                             | -0.54 |
| b2054 | wcaF | Isolate 2 | non-essential | predicted acyl transferase                                                                                             | 1.13  |
| b2055 | wcaE | Isolate 1 | non-essential | predicted glycosyl transferase                                                                                         | -0.37 |
| b2055 | wcaE | Isolate 2 | non-essential | predicted glycosyl transferase                                                                                         | 0.09  |
| b2056 | wcaD | Isolate 1 | non-essential | predicted colanic acid polymerase                                                                                      | 1.75  |
| b2056 | wcaD | Isolate 2 | non-essential | predicted colanic acid polymerase                                                                                      | 2.18  |
| b2057 | wcaC | Isolate 1 | non-essential | predicted glycosyl transferase                                                                                         | -0.59 |
| b2057 | wcaC | Isolate 2 | non-essential | predicted glycosyl transferase                                                                                         | 0.79  |
| b2058 | wcaB | Isolate 1 | non-essential | predicted acyl transferase                                                                                             | 3.76  |
| b2058 | wcaB | Isolate 2 | non-essential | predicted acyl transferase                                                                                             | 1.83  |
| b2059 | wcaA | Isolate 1 | non-essential | predicted glycosyl transferase                                                                                         | 2.81  |
| b2059 | wcaA | Isolate 2 | non-essential | predicted glycosyl transferase                                                                                         | 0.25  |
| b2060 | wzc  | Isolate 1 | non-essential | protein-tyrosine kinase                                                                                                | -1.07 |
| b2060 | wzc  | Isolate 2 | non-essential | protein-tyrosine kinase                                                                                                | -0.75 |
| b2061 | wzb  | Isolate 1 | non-essential | protein-tyrosine phosphatase                                                                                           | 2.10  |
| b2061 | wzb  | Isolate 2 | non-essential | protein-tyrosine phosphatase                                                                                           | 0.13  |
| b2062 | wza  | Isolate 1 | non-essential | lipoprotein required for capsular polysaccharide translocation through the outer membrane                              | 1.10  |
| b2062 | wza  | Isolate 2 | non-essential | lipoprotein required for capsular polysaccharide translocation through the outer membrane                              | -0.13 |
| b2063 | yegH | Isolate 1 | non-essential | fused predicted membrane proteins                                                                                      | 0.26  |
| b2063 | yegH | Isolate 2 | non-essential | fused predicted membrane proteins                                                                                      | 0.03  |
| b2064 | asmA | Isolate 1 | non-essential | predicted assembly protein                                                                                             | -0.26 |
| b2064 | asmA | Isolate 2 | non-essential | predicted assembly protein                                                                                             | 1.12  |
| b2065 | dcd  | Isolate 1 | non-essential | 2'-deoxycytidine 5'-triphosphate deaminase                                                                             | 0.33  |
| b2065 | dcd  | Isolate 2 | non-essential | 2'-deoxycytidine 5'-triphosphate deaminase                                                                             | -0.14 |
| b2066 | udk  | Isolate 1 | non-essential | uridine/cytidine kinase                                                                                                | -0.10 |
| b2066 | udk  | Isolate 2 | non-essential | uridine/cytidine kinase                                                                                                | 1.69  |
| b2067 | yegE | Isolate 1 | non-essential | predicted diguanylate cyclase, GGDEF domain signalling protein                                                         | 2.11  |
| b2067 | yegE | Isolate 2 | non-essential | predicted diguanylate cyclase, GGDEF domain signalling protein                                                         | -0.48 |
| b2068 | alkA | Isolate 1 | non-essential | 3-methyl-adenine DNA glycosylase II                                                                                    | 2.34  |
| b2068 | alkA | Isolate 2 | non-essential | 3-methyl-adenine DNA glycosylase II                                                                                    | -0.42 |
| b2069 | yegD | Isolate 1 | non-essential | predicted chaperone                                                                                                    | 0.50  |
| b2069 | yegD | Isolate 2 | non-essential | predicted chaperone                                                                                                    | 0.97  |
| b2070 | yegI | Isolate 1 | non-essential | conserved protein                                                                                                      | -0.01 |
| b2070 | yegI | Isolate 2 | non-essential | conserved protein                                                                                                      | -0.57 |

|       |      |           |               |                                                                             |       |
|-------|------|-----------|---------------|-----------------------------------------------------------------------------|-------|
| b2071 | yegJ | Isolate 1 | non-essential | predicted protein                                                           | -0.18 |
| b2071 | yegJ | Isolate 2 | non-essential | predicted protein                                                           | -1.55 |
| b2072 | yegK | Isolate 1 | non-essential | predicted protein                                                           | 0.81  |
| b2072 | yegK | Isolate 2 | non-essential | predicted protein                                                           | -3.05 |
| b2073 | yegL | Isolate 1 | non-essential | conserved protein                                                           | -0.96 |
| b2073 | yegL | Isolate 2 | non-essential | conserved protein                                                           | -0.32 |
| b2074 | mdtA | Isolate 1 | non-essential | multidrug efflux system, subunit A                                          | -2.12 |
| b2074 | mdtA | Isolate 2 | non-essential | multidrug efflux system, subunit A                                          | -1.94 |
| b2075 | mdtB | Isolate 1 | non-essential | multidrug efflux system, subunit B                                          | -1.93 |
| b2075 | mdtB | Isolate 2 | non-essential | multidrug efflux system, subunit B                                          | -0.08 |
| b2076 | mdtC | Isolate 1 | non-essential | multidrug efflux system, subunit C                                          | 2.00  |
| b2076 | mdtC | Isolate 2 | non-essential | multidrug efflux system, subunit C                                          | 1.09  |
| b2077 | mdtD | Isolate 1 | non-essential | multidrug efflux system protein                                             | 1.57  |
| b2077 | mdtD | Isolate 2 | non-essential | multidrug efflux system protein                                             | 0.88  |
| b2078 | baeS | Isolate 1 | non-essential | sensory histidine kinase in two-component regulatory system with BaeR       | -0.90 |
| b2078 | baeS | Isolate 2 | non-essential | sensory histidine kinase in two-component regulatory system with BaeR       | 0.72  |
| b2079 | baeR | Isolate 1 | non-essential | DNA-binding response regulator in two-component regulatory system with BaeS | -0.48 |
| b2079 | baeR | Isolate 2 | non-essential | DNA-binding response regulator in two-component regulatory system with BaeS | -0.32 |
| b2080 | yegP | Isolate 1 | non-essential | predicted protein                                                           | 0.27  |
| b2080 | yegP | Isolate 2 | non-essential | predicted protein                                                           | -3.32 |
| b2081 | yegQ | Isolate 1 | non-essential | predicted peptidase                                                         | -0.16 |
| b2081 | yegQ | Isolate 2 | non-essential | predicted peptidase                                                         | 1.18  |
| b2082 | ogrK | Isolate 1 | non-essential | DNA-binding transcriptional regulator -!-prophage P2 remnant                | -0.12 |
| b2082 | ogrK | Isolate 2 | non-essential | DNA-binding transcriptional regulator -!-prophage P2 remnant                | 1.62  |
| b2085 | yegR | Isolate 1 | non-essential | predicted protein                                                           | 0.17  |
| b2085 | yegR | Isolate 2 | non-essential | predicted protein                                                           | -1.52 |
| b2086 | yegS | Isolate 1 | non-essential | conserved protein                                                           | -0.36 |
| b2086 | yegS | Isolate 2 | non-essential | conserved protein                                                           | 1.49  |
| b2090 | gatR | Isolate 1 | *             | DNA-binding transcriptional regulator, C-ter fragment (pseudogene)          | -0.86 |
| b2090 | gatR | Isolate 2 | *             | DNA-binding transcriptional regulator, C-ter fragment (pseudogene)          | 1.81  |
| b2091 | gatD | Isolate 1 | non-essential | galactitol-1-phosphate dehydrogenase, Zn-dependent and NAD(P)-binding       | 0.59  |
| b2091 | gatD | Isolate 2 | non-essential | galactitol-1-phosphate dehydrogenase, Zn-dependent and NAD(P)-binding       | -0.73 |
| b2092 | gatC | Isolate 1 | non-essential | galactitol-specific enzyme IIC component of PTS                             | 1.22  |
| b2092 | gatC | Isolate 2 | non-essential | galactitol-specific enzyme IIC component of PTS                             | 1.58  |
| b2093 | gatB | Isolate 1 | non-essential | galactitol-specific enzyme IIB component of PTS                             | 0.77  |
| b2093 | gatB | Isolate 2 | non-essential | galactitol-specific enzyme IIB component of PTS                             | -0.01 |
| b2095 | gatZ | Isolate 1 | non-essential | D-tagatose 1,6-bisphosphate aldolase 2, subunit                             | -0.25 |
| b2095 | gatZ | Isolate 2 | non-essential | D-tagatose 1,6-bisphosphate aldolase 2, subunit                             | 0.03  |
| b2096 | gatY | Isolate 1 | non-essential | D-tagatose 1,6-bisphosphate aldolase 2, catalytic subunit                   | 2.64  |
| b2096 | gatY | Isolate 2 | non-essential | D-tagatose 1,6-bisphosphate aldolase 2, catalytic subunit                   | 1.76  |
| b2097 | fbaB | Isolate 1 | non-essential | fructose-bisphosphate aldolase class I                                      | -0.94 |
| b2097 | fbaB | Isolate 2 | non-essential | fructose-bisphosphate aldolase class I                                      | -0.43 |
| b2098 | yegT | Isolate 1 | non-essential | predicted nucleoside transporter                                            | -0.44 |



|       |      |           |               |                                                                                         |       |
|-------|------|-----------|---------------|-----------------------------------------------------------------------------------------|-------|
| b2098 | yegT | Isolate 2 | non-essential | predicted nucleoside transporter                                                        | 0.53  |
| b2099 | yegU | Isolate 1 | non-essential | predicted hydrolase                                                                     | -0.28 |
| b2099 | yegU | Isolate 2 | non-essential | predicted hydrolase                                                                     | -0.52 |
| b2100 | yegV | Isolate 1 | non-essential | predicted kinase                                                                        | -1.56 |
| b2100 | yegV | Isolate 2 | non-essential | predicted kinase                                                                        | 1.70  |
| b2101 | yegW | Isolate 1 | non-essential | predicted DNA-binding transcriptional regulator                                         | 2.18  |
| b2101 | yegW | Isolate 2 | non-essential | predicted DNA-binding transcriptional regulator                                         | 2.31  |
| b2102 | yegX | Isolate 1 | non-essential | predicted hydrolase                                                                     | -0.95 |
| b2102 | yegX | Isolate 2 | non-essential | predicted hydrolase                                                                     | -0.12 |
| b2103 | thiD | Isolate 1 | non-essential | bifunctional hydroxy-methylpyrimidine kinase -!- hydroxy-phosphomethylpyrimidine kinase | 0.80  |
| b2103 | thiD | Isolate 2 | non-essential | bifunctional hydroxy-methylpyrimidine kinase -!- hydroxy-phosphomethylpyrimidine kinase | -0.10 |
| b2104 | thiM | Isolate 1 | non-essential | hydroxyethylthiazole kinase                                                             | 1.33  |
| b2104 | thiM | Isolate 2 | non-essential | hydroxyethylthiazole kinase                                                             | -0.02 |
| b2105 | yohL | Isolate 1 | non-essential | conserved protein                                                                       | -0.10 |
| b2105 | yohL | Isolate 2 | non-essential | conserved protein                                                                       | -0.13 |
| b2106 | yohM | Isolate 1 | non-essential | membrane protein conferring nickel and cobalt resistance                                | -1.95 |
| b2106 | yohM | Isolate 2 | non-essential | membrane protein conferring nickel and cobalt resistance                                | -0.13 |
| b2107 | yohN | Isolate 1 | non-essential | predicted protein                                                                       | -0.77 |
| b2107 | yohN | Isolate 2 | non-essential | predicted protein                                                                       | -1.16 |
| b2108 | yehA | Isolate 1 | non-essential | predicted fimbrial-like adhesin protein                                                 | 1.96  |
| b2108 | yehA | Isolate 2 | non-essential | predicted fimbrial-like adhesin protein                                                 | 2.91  |
| b2109 | yehB | Isolate 1 | non-essential | predicted outer membrane protein                                                        | 0.90  |
| b2109 | yehB | Isolate 2 | non-essential | predicted outer membrane protein                                                        | 0.12  |
| b2110 | yehC | Isolate 1 | non-essential | predicted periplasmic pilin chaperone                                                   | 2.86  |
| b2110 | yehC | Isolate 2 | non-essential | predicted periplasmic pilin chaperone                                                   | 3.93  |
| b2111 | yehD | Isolate 1 | non-essential | predicted fimbrial-like adhesin protein                                                 | -0.84 |
| b2111 | yehD | Isolate 2 | non-essential | predicted fimbrial-like adhesin protein                                                 | -1.74 |
| b2112 | yehE | Isolate 1 | non-essential | predicted protein                                                                       | -0.57 |
| b2112 | yehE | Isolate 2 | non-essential | predicted protein                                                                       | 0.71  |
| b2113 | mrp  | Isolate 1 | non-essential | antiporter inner membrane protein                                                       | 1.86  |
| b2113 | mrp  | Isolate 2 | non-essential | antiporter inner membrane protein                                                       | -1.01 |
| b2115 | molR | Isolate 1 | *             | DNA-binding transcriptional regulator, N-ter fragment (pseudogene)                      | 1.60  |
| b2115 | molR | Isolate 2 | *             | DNA-binding transcriptional regulator, N-ter fragment (pseudogene)                      | 1.00  |
| b2117 | molR | Isolate 1 | *             | DNA-binding transcriptional regulator, C-ter fragment (pseudogene)                      | -0.88 |
| b2117 | molR | Isolate 2 | *             | DNA-binding transcriptional regulator, C-ter fragment (pseudogene)                      | -0.82 |
| b2118 | yehI | Isolate 1 | non-essential | conserved protein                                                                       | 0.75  |
| b2118 | yehI | Isolate 2 | non-essential | conserved protein                                                                       | 0.09  |
| b2119 | yehL | Isolate 1 | non-essential | predicted transporter subunit -!- ATP-binding components of ABC superfamily             | -0.03 |
| b2119 | yehL | Isolate 2 | non-essential | predicted transporter subunit -!- ATP-binding components of ABC superfamily             | -0.28 |
| b2120 | yehM | Isolate 1 | non-essential | predicted protein                                                                       | 0.46  |
| b2120 | yehM | Isolate 2 | non-essential | predicted protein                                                                       | -1.36 |
| b2121 | yehP | Isolate 1 | non-essential | conserved protein                                                                       | 0.27  |
| b2121 | yehP | Isolate 2 | non-essential | conserved protein                                                                       | 0.80  |

|       |      |           |               |                                                                                    |       |
|-------|------|-----------|---------------|------------------------------------------------------------------------------------|-------|
| b2122 | yehQ | Isolate 1 | non-essential | predicted protein                                                                  | -0.14 |
| b2122 | yehQ | Isolate 2 | non-essential | predicted protein                                                                  | -0.36 |
| b2123 | yehR | Isolate 1 | non-essential | conserved protein                                                                  | -1.21 |
| b2123 | yehR | Isolate 2 | non-essential | conserved protein                                                                  | -0.58 |
| b2124 | yehS | Isolate 1 | non-essential | conserved protein                                                                  | 1.06  |
| b2124 | yehS | Isolate 2 | non-essential | conserved protein                                                                  | -0.72 |
| b2125 | yehT | Isolate 1 | non-essential | predicted response regulator in two-component system with YehU                     | -1.45 |
| b2125 | yehT | Isolate 2 | non-essential | predicted response regulator in two-component system with YehU                     | -1.02 |
| b2126 | yehU | Isolate 1 | non-essential | predicted sensory kinase in two-component system with YehT                         | -0.64 |
| b2126 | yehU | Isolate 2 | non-essential | predicted sensory kinase in two-component system with YehT                         | 0.36  |
| b2127 | mlrA | Isolate 1 | non-essential | DNA-binding transcriptional regulator                                              | 1.03  |
| b2127 | mlrA | Isolate 2 | non-essential | DNA-binding transcriptional regulator                                              | 0.73  |
| b2128 | yehW | Isolate 1 | non-essential | predicted transporter subunit -!- membrane component of ABC superfamily            | -1.35 |
| b2128 | yehW | Isolate 2 | non-essential | predicted transporter subunit -!- membrane component of ABC superfamily            | -0.92 |
| b2129 | yehX | Isolate 1 | non-essential | predicted transporter subunit -!- ATP-binding component of ABC superfamily         | -0.93 |
| b2129 | yehX | Isolate 2 | non-essential | predicted transporter subunit -!- ATP-binding component of ABC superfamily         | 0.00  |
| b2130 | yehY | Isolate 1 | non-essential | predicted transporter subunit -!- membrane component of ABC superfamily            | -0.27 |
| b2130 | yehY | Isolate 2 | non-essential | predicted transporter subunit -!- membrane component of ABC superfamily            | 0.50  |
| b2131 | yehZ | Isolate 1 | non-essential | predicted transporter subunit -!- periplasmic-binding component of ABC superfamily | 0.77  |
| b2131 | yehZ | Isolate 2 | non-essential | predicted transporter subunit -!- periplasmic-binding component of ABC superfamily | -0.10 |
| b2132 | bglX | Isolate 1 | non-essential | beta-D-glucoside glucohydrolase, periplasmic                                       | 2.49  |
| b2132 | bglX | Isolate 2 | non-essential | beta-D-glucoside glucohydrolase, periplasmic                                       | 1.82  |
| b2133 | dld  | Isolate 1 | non-essential | D-lactate dehydrogenase, FAD-binding, NADH independent                             | -0.24 |
| b2133 | dld  | Isolate 2 | non-essential | D-lactate dehydrogenase, FAD-binding, NADH independent                             | 0.36  |
| b2134 | pbpG | Isolate 1 | non-essential | D-alanyl-D-alanine endopeptidase                                                   | -0.91 |
| b2134 | pbpG | Isolate 2 | non-essential | D-alanyl-D-alanine endopeptidase                                                   | -2.07 |
| b2135 | yohC | Isolate 1 | non-essential | predicted inner membrane protein                                                   | -0.45 |
| b2135 | yohC | Isolate 2 | non-essential | predicted inner membrane protein                                                   | -0.21 |
| b2136 | yohD | Isolate 1 | non-essential | conserved inner membrane protein                                                   | -0.76 |
| b2136 | yohD | Isolate 2 | non-essential | conserved inner membrane protein                                                   | 1.12  |
| b2137 | yohF | Isolate 1 | non-essential | predicted oxidoreductase with NAD(P)-binding Rossmann-fold domain                  | 0.36  |
| b2137 | yohF | Isolate 2 | non-essential | predicted oxidoreductase with NAD(P)-binding Rossmann-fold domain                  | 1.35  |
| b2138 | yohG | Isolate 1 | non-essential | predicted outer membrane protein                                                   | 0.38  |
| b2138 | yohG | Isolate 2 | non-essential | predicted outer membrane protein                                                   | 0.54  |
| b2139 | yohH | Isolate 1 | non-essential | conserved protein                                                                  | -0.30 |
| b2139 | yohH | Isolate 2 | non-essential | conserved protein                                                                  | -1.62 |
| b2140 | dusC | Isolate 1 | non-essential | tRNA-dihydrouridine synthase C                                                     | -0.74 |
| b2140 | dusC | Isolate 2 | non-essential | tRNA-dihydrouridine synthase C                                                     | 1.09  |
| b2141 | yohJ | Isolate 1 | non-essential | conserved inner membrane protein                                                   | 0.68  |
| b2141 | yohJ | Isolate 2 | non-essential | conserved inner membrane protein                                                   | 1.14  |
| b2142 | yohK | Isolate 1 | non-essential | predicted inner membrane protein                                                   | -0.36 |
| b2142 | yohK | Isolate 2 | non-essential | predicted inner membrane protein                                                   | 1.81  |
| b2143 | cdd  | Isolate 1 | non-essential | cytidine/deoxycytidine deaminase                                                   | 0.29  |

|       |      |           |               |                                                                                              |        |
|-------|------|-----------|---------------|----------------------------------------------------------------------------------------------|--------|
| b2143 | cdd  | Isolate 2 | non-essential | cytidine/deoxycytidine deaminase                                                             | -0.76  |
| b2144 | sanA | Isolate 1 | non-essential | predicted protein                                                                            | 1.77   |
| b2144 | sanA | Isolate 2 | non-essential | predicted protein                                                                            | 1.70   |
| b2145 | yeiS | Isolate 1 | non-essential | predicted inner membrane protein                                                             | 1.85   |
| b2145 | yeiS | Isolate 2 | non-essential | predicted inner membrane protein                                                             | 0.77   |
| b2146 | yeiT | Isolate 1 | non-essential | predicted oxidoreductase                                                                     | -0.36  |
| b2146 | yeiT | Isolate 2 | non-essential | predicted oxidoreductase                                                                     | -1.50  |
| b2147 | yeiA | Isolate 1 | non-essential | predicted oxidoreductase                                                                     | 0.11   |
| b2147 | yeiA | Isolate 2 | non-essential | predicted oxidoreductase                                                                     | 0.15   |
| b2148 | mglC | Isolate 1 | non-essential | methyl-galactoside transporter subunit -!- membrane component of ABC superfamily             | 1.19   |
| b2148 | mglC | Isolate 2 | non-essential | methyl-galactoside transporter subunit -!- membrane component of ABC superfamily             | -0.32  |
| b2149 | mglA | Isolate 1 | non-essential | fused methyl-galactoside transporter subunits! -!- ATP-binding components of ABC superfamily | 0.63   |
| b2149 | mglA | Isolate 2 | non-essential | fused methyl-galactoside transporter subunits! -!- ATP-binding components of ABC superfamily | -0.65  |
| b2150 | mglB | Isolate 1 | non-essential | methyl-galactoside transporter subunit -!- periplasmic-binding component of ABC superfamily  | 0.21   |
| b2150 | mglB | Isolate 2 | non-essential | methyl-galactoside transporter subunit -!- periplasmic-binding component of ABC superfamily  | 0.05   |
| b2151 | galS | Isolate 1 | non-essential | DNA-binding transcriptional repressor                                                        | 2.99   |
| b2151 | galS | Isolate 2 | non-essential | DNA-binding transcriptional repressor                                                        | 1.82   |
| b2152 | yeiB | Isolate 1 | non-essential | conserved inner membrane protein                                                             | 0.63   |
| b2152 | yeiB | Isolate 2 | non-essential | conserved inner membrane protein                                                             | -0.65  |
| b2154 | yeiG | Isolate 1 | non-essential | predicted esterase                                                                           | 1.17   |
| b2154 | yeiG | Isolate 2 | non-essential | predicted esterase                                                                           | 2.43   |
| b2155 | cirA | Isolate 1 | non-essential | ferric iron-catecholate outer membrane transporter                                           | -0.73  |
| b2155 | cirA | Isolate 2 | non-essential | ferric iron-catecholate outer membrane transporter                                           | -0.78  |
| b2156 | lysP | Isolate 1 | non-essential | lysine transporter                                                                           | 1.12   |
| b2156 | lysP | Isolate 2 | non-essential | lysine transporter                                                                           | 1.20   |
| b2157 | yeiE | Isolate 1 | non-essential | predicted DNA-binding transcriptional regulator                                              | 0.23   |
| b2157 | yeiE | Isolate 2 | non-essential | predicted DNA-binding transcriptional regulator                                              | 1.43   |
| b2158 | yeiH | Isolate 1 | non-essential | conserved inner membrane protein                                                             | 0.23   |
| b2158 | yeiH | Isolate 2 | non-essential | conserved inner membrane protein                                                             | 0.02   |
| b2159 | nfo  | Isolate 1 | non-essential | endonuclease IV with intrinsic 3'-5' exonuclease activity                                    | 0.54   |
| b2159 | nfo  | Isolate 2 | non-essential | endonuclease IV with intrinsic 3'-5' exonuclease activity                                    | -0.41  |
| b2160 | yeiI | Isolate 1 | non-essential | predicted kinase                                                                             | 0.27   |
| b2160 | yeiI | Isolate 2 | non-essential | predicted kinase                                                                             | 0.45   |
| b2161 | yeiJ | Isolate 1 | non-essential | predicted nucleoside transporter                                                             | 1.18   |
| b2161 | yeiJ | Isolate 2 | non-essential | predicted nucleoside transporter                                                             | -0.53  |
| b2162 | rihB | Isolate 1 | non-essential | ribonucleoside hydrolase 2                                                                   | -0.15  |
| b2162 | rihB | Isolate 2 | non-essential | ribonucleoside hydrolase 2                                                                   | 0.52   |
| b2163 | yeiL | Isolate 1 | non-essential | DNA-binding transcriptional activator                                                        | -12.69 |
| b2163 | yeiL | Isolate 2 | non-essential | DNA-binding transcriptional activator                                                        | -2.65  |
| b2164 | yeiM | Isolate 1 | non-essential | predicted nucleoside transporter                                                             | -1.19  |
| b2164 | yeiM | Isolate 2 | non-essential | predicted nucleoside transporter                                                             | 0.58   |
| b2165 | yeiN | Isolate 1 | non-essential | conserved protein                                                                            | 0.01   |
| b2165 | yeiN | Isolate 2 | non-essential | conserved protein                                                                            | -1.68  |

|       |      |           |               |                                                                                                 |       |
|-------|------|-----------|---------------|-------------------------------------------------------------------------------------------------|-------|
| b2166 | yeiC | Isolate 1 | non-essential | predicted kinase                                                                                | 0.17  |
| b2166 | yeiC | Isolate 2 | non-essential | predicted kinase                                                                                | 5.08  |
| b2167 | fruA | Isolate 1 | non-essential | fused fructose-specific PTS enzyme IIB'BC components                                            | 1.55  |
| b2167 | fruA | Isolate 2 | non-essential | fused fructose-specific PTS enzyme IIB'BC components                                            | 0.92  |
| b2168 | fruK | Isolate 1 | non-essential | fructose-1-phosphate kinase                                                                     | -0.88 |
| b2168 | fruK | Isolate 2 | non-essential | fructose-1-phosphate kinase                                                                     | -0.35 |
| b2169 | fruB | Isolate 1 | non-essential | fused fructose-specific PTS enzyme IIA component -!- HPr component                              | -0.19 |
| b2169 | fruB | Isolate 2 | non-essential | fused fructose-specific PTS enzyme IIA component -!- HPr component                              | 1.28  |
| b2170 | setB | Isolate 1 | non-essential | lactose/glucose efflux system                                                                   | -1.25 |
| b2170 | setB | Isolate 2 | non-essential | lactose/glucose efflux system                                                                   | -0.34 |
| b2171 | yeiP | Isolate 1 | non-essential | predicted elongtion factor                                                                      | 3.30  |
| b2171 | yeiP | Isolate 2 | non-essential | predicted elongtion factor                                                                      | -0.74 |
| b2172 | yeiQ | Isolate 1 | non-essential | predicted dehydrogenase, NAD-dependent                                                          | -0.08 |
| b2172 | yeiQ | Isolate 2 | non-essential | predicted dehydrogenase, NAD-dependent                                                          | 0.42  |
| b2173 | yeiR | Isolate 1 | non-essential | predicted enzyme                                                                                | 1.91  |
| b2173 | yeiR | Isolate 2 | non-essential | predicted enzyme                                                                                | 0.38  |
| b2174 | yeiU | Isolate 1 | non-essential | undecaprenyl pyrophosphate phosphatase                                                          | -1.79 |
| b2174 | yeiU | Isolate 2 | non-essential | undecaprenyl pyrophosphate phosphatase                                                          | 0.10  |
| b2175 | spr  | Isolate 1 | non-essential | predicted peptidase, outer membrane lipoprotein                                                 | -1.95 |
| b2175 | spr  | Isolate 2 | non-essential | predicted peptidase, outer membrane lipoprotein                                                 | -2.48 |
| b2176 | rtn  | Isolate 1 | non-essential | conserved protein                                                                               | 0.46  |
| b2176 | rtn  | Isolate 2 | non-essential | conserved protein                                                                               | 0.04  |
| b2177 | yejA | Isolate 1 | non-essential | predicted oligopeptide transporter subunit -!- periplasmic-binding component of ABC superfamily | 0.16  |
| b2177 | yejA | Isolate 2 | non-essential | predicted oligopeptide transporter subunit -!- periplasmic-binding component of ABC superfamily | 0.74  |
| b2178 | yejB | Isolate 1 | non-essential | predicted oligopeptide transporter subunit -!- membrane component of ABC superfamily            | 2.62  |
| b2178 | yejB | Isolate 2 | non-essential | predicted oligopeptide transporter subunit -!- membrane component of ABC superfamily            | 0.60  |
| b2179 | yejE | Isolate 1 | non-essential | predicted oligopeptide transporter subunit -!- membrane component of ABC superfamily            | -0.79 |
| b2179 | yejE | Isolate 2 | non-essential | predicted oligopeptide transporter subunit -!- membrane component of ABC superfamily            | 1.66  |
| b2180 | yejF | Isolate 1 | non-essential | fused predicted oligopeptide transporter subunits -!- ATP-binding components of ABC superfamily | -3.90 |
| b2180 | yejF | Isolate 2 | non-essential | fused predicted oligopeptide transporter subunits -!- ATP-binding components of ABC superfamily | -1.00 |
| b2181 | yejG | Isolate 1 | non-essential | predicted protein                                                                               | 0.43  |
| b2181 | yejG | Isolate 2 | non-essential | predicted protein                                                                               | -0.28 |
| b2182 | bcr  | Isolate 1 | non-essential | bicyclomycin/multidrug efflux system                                                            | 2.66  |
| b2182 | bcr  | Isolate 2 | non-essential | bicyclomycin/multidrug efflux system                                                            | 0.05  |
| b2183 | rsuA | Isolate 1 | non-essential | 16S rRNA pseudouridylate 516 synthase                                                           | -0.15 |
| b2183 | rsuA | Isolate 2 | non-essential | 16S rRNA pseudouridylate 516 synthase                                                           | 0.75  |
| b2184 | yejH | Isolate 1 | non-essential | predicted ATP-dependet helicase                                                                 | -0.14 |
| b2184 | yejH | Isolate 2 | non-essential | predicted ATP-dependet helicase                                                                 | -1.36 |
| b2185 | rplY | Isolate 1 | non-essential | 50S ribosomal subunit protein L25                                                               | 1.95  |
| b2185 | rplY | Isolate 2 | non-essential | 50S ribosomal subunit protein L25                                                               | -0.03 |
| b2186 | yejK | Isolate 1 | non-essential | nucleotide associated protein                                                                   | -0.31 |
| b2186 | yejK | Isolate 2 | non-essential | nucleotide associated protein                                                                   | -1.51 |
| b2187 | yejL | Isolate 1 | non-essential | conserved protein                                                                               | -0.80 |

|       |      |           |               |                                                                                                                  |        |
|-------|------|-----------|---------------|------------------------------------------------------------------------------------------------------------------|--------|
| b2187 | yejL | Isolate 2 | non-essential | conserved protein                                                                                                | -1.64  |
| b2188 | yejM | Isolate 1 | essential     | predicted hydrolase, inner membrane                                                                              | -1.49  |
| b2190 | yejO | Isolate 1 | non-essential | predicted autotransporter outer membrane protein                                                                 | -1.88  |
| b2190 | yejO | Isolate 2 | non-essential | predicted autotransporter outer membrane protein                                                                 | -1.49  |
| b2193 | narP | Isolate 1 | non-essential | DNA-binding response regulator in two-component regulatory system with NarQ or NarX                              | -13.74 |
| b2193 | narP | Isolate 2 | non-essential | DNA-binding response regulator in two-component regulatory system with NarQ or NarX                              | -0.45  |
| b2194 | ccmH | Isolate 1 | non-essential | heme lyase, CcmH subunit                                                                                         | 0.41   |
| b2194 | ccmH | Isolate 2 | non-essential | heme lyase, CcmH subunit                                                                                         | -0.22  |
| b2195 | ccmG | Isolate 1 | non-essential | periplasmic thioredoxin of cytochrome c-type biogenesis                                                          | -0.43  |
| b2195 | ccmG | Isolate 2 | non-essential | periplasmic thioredoxin of cytochrome c-type biogenesis                                                          | 0.66   |
| b2196 | ccmF | Isolate 1 | non-essential | heme lyase, CcmF subunit                                                                                         | -5.19  |
| b2196 | ccmF | Isolate 2 | non-essential | heme lyase, CcmF subunit                                                                                         | -4.83  |
| b2197 | ccmE | Isolate 1 | non-essential | periplasmic heme chaperone                                                                                       | -0.09  |
| b2197 | ccmE | Isolate 2 | non-essential | periplasmic heme chaperone                                                                                       | 0.63   |
| b2198 | ccmD | Isolate 1 | non-essential | cytochrome c biogenesis protein                                                                                  | -1.20  |
| b2198 | ccmD | Isolate 2 | non-essential | cytochrome c biogenesis protein                                                                                  | 1.21   |
| b2199 | ccmC | Isolate 1 | non-essential | heme exporter subunit -!- membrane component of ABC superfamily                                                  | 0.50   |
| b2199 | ccmC | Isolate 2 | non-essential | heme exporter subunit -!- membrane component of ABC superfamily                                                  | 0.13   |
| b2200 | ccmB | Isolate 1 | non-essential | heme exporter subunit -!- membrane component of ABC superfamily                                                  | 0.79   |
| b2200 | ccmB | Isolate 2 | non-essential | heme exporter subunit -!- membrane component of ABC superfamily                                                  | 0.27   |
| b2201 | ccmA | Isolate 1 | non-essential | heme exporter subunit -!- ATP-binding component of ABC superfamily                                               | 0.94   |
| b2201 | ccmA | Isolate 2 | non-essential | heme exporter subunit -!- ATP-binding component of ABC superfamily                                               | 0.34   |
| b2202 | napC | Isolate 1 | non-essential | nitrate reductase, cytochrome c-type,periplasmic                                                                 | 1.85   |
| b2202 | napC | Isolate 2 | non-essential | nitrate reductase, cytochrome c-type,periplasmic                                                                 | 0.22   |
| b2203 | napB | Isolate 1 | non-essential | nitrate reductase, small, cytochrome C550 subunit, periplasmic                                                   | -0.01  |
| b2203 | napB | Isolate 2 | non-essential | nitrate reductase, small, cytochrome C550 subunit, periplasmic                                                   | 0.44   |
| b2204 | napH | Isolate 1 | non-essential | ferredoxin-type protein essential for electron transfer from ubiquinol to periplasmic nitrate reductase (NapAB)  | 1.20   |
| b2204 | napH | Isolate 2 | non-essential | ferredoxin-type protein essential for electron transfer from ubiquinol to periplasmic nitrate reductase (NapAB)  | -0.38  |
| b2205 | napG | Isolate 1 | non-essential | ferredoxin-type protein essential for electron transfer from ubiquinol to periplasmic nitrate reductase (NapAB)  | 0.44   |
| b2205 | napG | Isolate 2 | non-essential | ferredoxin-type protein essential for electron transfer from ubiquinol to periplasmic nitrate reductase (NapAB)  | -0.74  |
| b2206 | napA | Isolate 1 | non-essential | nitrate reductase, periplasmic, large subunit                                                                    | 2.04   |
| b2206 | napA | Isolate 2 | non-essential | nitrate reductase, periplasmic, large subunit                                                                    | 2.14   |
| b2207 | napD | Isolate 1 | non-essential | assembly protein for periplasmic nitrate reductase                                                               | 1.20   |
| b2207 | napD | Isolate 2 | non-essential | assembly protein for periplasmic nitrate reductase                                                               | 1.22   |
| b2208 | napF | Isolate 1 | non-essential | ferredoxin-type protein, predicted role in electron transfer to periplasmic nitrate reductase (NapA)             | 1.95   |
| b2208 | napF | Isolate 2 | non-essential | ferredoxin-type protein, predicted role in electron transfer to periplasmic nitrate reductase (NapA)             | 0.65   |
| b2209 | eco  | Isolate 1 | non-essential | ecotin, a serine protease inhibitor                                                                              | 1.32   |
| b2209 | eco  | Isolate 2 | non-essential | ecotin, a serine protease inhibitor                                                                              | 1.70   |
| b2210 | mgo  | Isolate 1 | non-essential | malate dehydrogenase, FAD/NAD(P)-binding domain                                                                  | 0.55   |
| b2210 | mgo  | Isolate 2 | non-essential | malate dehydrogenase, FAD/NAD(P)-binding domain                                                                  | 0.98   |
| b2211 | yojI | Isolate 1 | non-essential | fused predicted multidrug transport subunits -!- membrane component and ATP-binding component of ABC superfamily | -0.46  |
| b2211 | yojI | Isolate 2 | non-essential | fused predicted multidrug transport subunits -!- membrane component and ATP-binding component of ABC superfamily | 1.00   |
| b2212 | alkB | Isolate 1 | non-essential | oxidative demethylase of N1-methyladenine or N3-methylcytosine DNA lesions                                       | -0.57  |

|       |      |           |               |                                                                                                     |       |
|-------|------|-----------|---------------|-----------------------------------------------------------------------------------------------------|-------|
| b2212 | alkB | Isolate 2 | non-essential | oxidative demethylase of N1-methyladenine or N3-methylcytosine DNA lesions                          | -0.77 |
| b2213 | ada  | Isolate 1 | non-essential | fused DNA-binding transcriptional dual regulator -!- O6-methylguanine-DNA methyltransferase         | 1.37  |
| b2213 | ada  | Isolate 2 | non-essential | fused DNA-binding transcriptional dual regulator -!- O6-methylguanine-DNA methyltransferase         | -0.31 |
| b2214 | yojL | Isolate 1 | non-essential | predicted thiamine biosynthesis lipoprotein                                                         | 0.77  |
| b2214 | yojL | Isolate 2 | non-essential | predicted thiamine biosynthesis lipoprotein                                                         | 2.48  |
| b2215 | ompC | Isolate 1 | non-essential | outer membrane porin protein C                                                                      | -1.29 |
| b2215 | ompC | Isolate 2 | non-essential | outer membrane porin protein C                                                                      | -2.04 |
| b2216 | rcsD | Isolate 1 | non-essential | phosphotransfer intermediate protein in two-component regulatory system with RcsBC                  | -0.85 |
| b2216 | rcsD | Isolate 2 | non-essential | phosphotransfer intermediate protein in two-component regulatory system with RcsBC                  | 2.20  |
| b2217 | rcsB | Isolate 1 | non-essential | DNA-binding response regulator in two-component regulatory system with RcsC and YojN                | -1.10 |
| b2217 | rcsB | Isolate 2 | non-essential | DNA-binding response regulator in two-component regulatory system with RcsC and YojN                | 1.69  |
| b2218 | rcsC | Isolate 1 | unknown       | hybrid sensory kinase in two-component regulatory system with RcsB and YojN                         | 0.72  |
| b2218 | rcsC | Isolate 2 | unknown       | hybrid sensory kinase in two-component regulatory system with RcsB and YojN                         | -1.32 |
| b2219 | atoS | Isolate 1 | non-essential | sensory histidine kinase in two-component regulatory system with AtoC                               | 0.05  |
| b2219 | atoS | Isolate 2 | non-essential | sensory histidine kinase in two-component regulatory system with AtoC                               | -0.25 |
| b2220 | atoC | Isolate 1 | non-essential | fused response regulator of ato opeon, in two-component system with AtoS                            | 2.26  |
| b2220 | atoC | Isolate 2 | non-essential | fused response regulator of ato opeon, in two-component system with AtoS                            | 5.15  |
| b2221 | atoD | Isolate 1 | non-essential | acetyl-CoA:acetoacetyl-CoA transferase, alpha subunit                                               | 1.67  |
| b2221 | atoD | Isolate 2 | non-essential | acetyl-CoA:acetoacetyl-CoA transferase, alpha subunit                                               | 0.83  |
| b2222 | atoA | Isolate 1 | non-essential | acetyl-CoA:acetoacetyl-CoA transferase, beta subunit                                                | -0.41 |
| b2222 | atoA | Isolate 2 | non-essential | acetyl-CoA:acetoacetyl-CoA transferase, beta subunit                                                | 1.04  |
| b2223 | atoE | Isolate 1 | non-essential | short chain fatty acid transporter                                                                  | 0.17  |
| b2223 | atoE | Isolate 2 | non-essential | short chain fatty acid transporter                                                                  | 0.20  |
| b2224 | atoB | Isolate 1 | non-essential | acetyl-CoA acetyltransferase                                                                        | -0.58 |
| b2224 | atoB | Isolate 2 | non-essential | acetyl-CoA acetyltransferase                                                                        | -1.27 |
| b2225 | yfaP | Isolate 1 | non-essential | conserved protein                                                                                   | 0.95  |
| b2225 | yfaP | Isolate 2 | non-essential | conserved protein                                                                                   | 0.53  |
| b2226 | yfaQ | Isolate 1 | non-essential | predicted protein                                                                                   | 1.31  |
| b2226 | yfaQ | Isolate 2 | non-essential | predicted protein                                                                                   | -2.11 |
| b2227 | yfaS | Isolate 1 | *             | predicted protein, C-ter fragment (pseudogene)                                                      | -1.40 |
| b2227 | yfaS | Isolate 2 | *             | predicted protein, C-ter fragment (pseudogene)                                                      | -0.91 |
| b2229 | yfaT | Isolate 1 | non-essential | predicted protein                                                                                   | -0.86 |
| b2229 | yfaT | Isolate 2 | non-essential | predicted protein                                                                                   | 1.11  |
| b2230 | yfaA | Isolate 1 | non-essential | predicted protein                                                                                   | -1.17 |
| b2230 | yfaA | Isolate 2 | non-essential | predicted protein                                                                                   | -0.60 |
| b2231 | gyrA | Isolate 1 | essential     | DNA gyrase (type II topoisomerase), subunit A                                                       | 0.40  |
| b2232 | ubiG | Isolate 1 | non-essential | bifunctional 3-demethylubiquinone-9 3-methyltransferase -!- 2-octaprenyl-6-hydroxy phenol methylase | 1.75  |
| b2232 | ubiG | Isolate 2 | non-essential | bifunctional 3-demethylubiquinone-9 3-methyltransferase -!- 2-octaprenyl-6-hydroxy phenol methylase | 0.59  |
| b2233 | yfaL | Isolate 1 | non-essential | adhesin                                                                                             | -0.52 |
| b2233 | yfaL | Isolate 2 | non-essential | adhesin                                                                                             | 2.50  |
| b2236 | yfaE | Isolate 1 | non-essential | predicted 2Fe-2S cluster-containing protein                                                         | -0.91 |
| b2236 | yfaE | Isolate 2 | non-essential | predicted 2Fe-2S cluster-containing protein                                                         | -0.30 |
| b2237 | inaA | Isolate 1 | non-essential | conserved protein                                                                                   | -1.69 |

|       |      |           |               |                                                                                              |       |
|-------|------|-----------|---------------|----------------------------------------------------------------------------------------------|-------|
| b2237 | inaA | Isolate 2 | non-essential | conserved protein                                                                            | 0.08  |
| b2238 | yfaH | Isolate 1 | non-essential | conserved protein                                                                            | 0.52  |
| b2238 | yfaH | Isolate 2 | non-essential | conserved protein                                                                            | -0.15 |
| b2239 | glpQ | Isolate 1 | non-essential | periplasmic glycerophosphodiester phosphodiesterase                                          | -0.16 |
| b2239 | glpQ | Isolate 2 | non-essential | periplasmic glycerophosphodiester phosphodiesterase                                          | 0.03  |
| b2240 | glpT | Isolate 1 | non-essential | sn-glycerol-3-phosphate transporter                                                          | 0.11  |
| b2240 | glpT | Isolate 2 | non-essential | sn-glycerol-3-phosphate transporter                                                          | -1.24 |
| b2241 | glpA | Isolate 1 | non-essential | sn-glycerol-3-phosphate dehydrogenase (anaerobic), large subunit, FAD/NAD(P)-binding         | -0.88 |
| b2241 | glpA | Isolate 2 | non-essential | sn-glycerol-3-phosphate dehydrogenase (anaerobic), large subunit, FAD/NAD(P)-binding         | 0.69  |
| b2242 | glpB | Isolate 1 | non-essential | sn-glycerol-3-phosphate dehydrogenase (anaerobic), membrane anchor subunit                   | -1.10 |
| b2242 | glpB | Isolate 2 | non-essential | sn-glycerol-3-phosphate dehydrogenase (anaerobic), membrane anchor subunit                   | 0.46  |
| b2243 | glpC | Isolate 1 | non-essential | sn-glycerol-3-phosphate dehydrogenase (anaerobic), small subunit                             | 3.03  |
| b2243 | glpC | Isolate 2 | non-essential | sn-glycerol-3-phosphate dehydrogenase (anaerobic), small subunit                             | 0.99  |
| b2244 | yfaD | Isolate 1 | non-essential | conserved protein                                                                            | -1.43 |
| b2244 | yfaD | Isolate 2 | non-essential | conserved protein                                                                            | -0.68 |
| b2245 | yfaU | Isolate 1 | non-essential | predicted 2,4-dihydroxyhept-2-ene-1,7-dioic acid aldolase                                    | -1.89 |
| b2245 | yfaU | Isolate 2 | non-essential | predicted 2,4-dihydroxyhept-2-ene-1,7-dioic acid aldolase                                    | -0.86 |
| b2246 | yfaV | Isolate 1 | non-essential | predicted transporter                                                                        | 0.21  |
| b2246 | yfaV | Isolate 2 | non-essential | predicted transporter                                                                        | 0.39  |
| b2247 | yfaW | Isolate 1 | non-essential | predicted enolase                                                                            | 1.60  |
| b2247 | yfaW | Isolate 2 | non-essential | predicted enolase                                                                            | -0.10 |
| b2248 | yfaX | Isolate 1 | non-essential | predicted DNA-binding transcriptional regulator                                              | 1.18  |
| b2248 | yfaX | Isolate 2 | non-essential | predicted DNA-binding transcriptional regulator                                              | -0.44 |
| b2249 | yfaY | Isolate 1 | non-essential | conserved protein                                                                            | -0.61 |
| b2249 | yfaY | Isolate 2 | non-essential | conserved protein                                                                            | 1.97  |
| b2250 | yfaZ | Isolate 1 | non-essential | predicted outer membrane porin protein                                                       | -1.46 |
| b2250 | yfaZ | Isolate 2 | non-essential | predicted outer membrane porin protein                                                       | -0.92 |
| b2251 | yfaO | Isolate 1 | non-essential | predicted NUDIX hydrolase                                                                    | 1.61  |
| b2251 | yfaO | Isolate 2 | non-essential | predicted NUDIX hydrolase                                                                    | -0.39 |
| b2252 | ais  | Isolate 1 | non-essential | conserved protein                                                                            | 1.07  |
| b2252 | ais  | Isolate 2 | non-essential | conserved protein                                                                            | -0.36 |
| b2253 | yfbE | Isolate 1 | non-essential | uridine 5'-(beta-1-threo-pentapyranosyl-4-ulose diphosphate) aminotransferase, PLP-dependent | -0.16 |
| b2253 | yfbE | Isolate 2 | non-essential | uridine 5'-(beta-1-threo-pentapyranosyl-4-ulose diphosphate) aminotransferase, PLP-dependent | 0.12  |
| b2254 | yfbF | Isolate 1 | non-essential | undecaprenyl phosphate-L-Ara4FN transferase                                                  | 1.25  |
| b2254 | yfbF | Isolate 2 | non-essential | undecaprenyl phosphate-L-Ara4FN transferase                                                  | -0.60 |
| b2255 | yfbG | Isolate 1 | non-essential | fused UDP-L-Ara4N formyltransferase -!- UDP-GlcA C-4'-decarboxylase                          | -0.09 |
| b2255 | yfbG | Isolate 2 | non-essential | fused UDP-L-Ara4N formyltransferase -!- UDP-GlcA C-4'-decarboxylase                          | 3.24  |
| b2256 | yfbH | Isolate 1 | non-essential | conserved protein                                                                            | 1.53  |
| b2256 | yfbH | Isolate 2 | non-essential | conserved protein                                                                            | 1.60  |
| b2257 | arnT | Isolate 1 | non-essential | 4-amino-4-deoxy-L-arabinose transferase                                                      | -1.06 |
| b2257 | arnT | Isolate 2 | non-essential | 4-amino-4-deoxy-L-arabinose transferase                                                      | -1.25 |
| b2258 | yfbJ | Isolate 1 | non-essential | predicted inner membrane protein                                                             | -1.91 |
| b2258 | yfbJ | Isolate 2 | non-essential | predicted inner membrane protein                                                             | -2.02 |

|       |      |           |               |                                                                  |       |
|-------|------|-----------|---------------|------------------------------------------------------------------|-------|
| b2259 | pmrD | Isolate 1 | non-essential | polymyxin resistance protein B                                   | 0.35  |
| b2259 | pmrD | Isolate 2 | non-essential | polymyxin resistance protein B                                   | -1.01 |
| b2260 | menE | Isolate 1 | non-essential | o-succinylbenzoate-CoA ligase                                    | 0.68  |
| b2260 | menE | Isolate 2 | non-essential | o-succinylbenzoate-CoA ligase                                    | 1.73  |
| b2261 | menC | Isolate 1 | non-essential | o-succinylbenzoyl-CoA synthase                                   | 3.10  |
| b2261 | menC | Isolate 2 | non-essential | o-succinylbenzoyl-CoA synthase                                   | 1.13  |
| b2262 | menB | Isolate 1 | non-essential | dihydroxynaphthoic acid synthetase                               | 0.41  |
| b2262 | menB | Isolate 2 | non-essential | dihydroxynaphthoic acid synthetase                               | 1.00  |
| b2263 | yfbB | Isolate 1 | non-essential | predicted peptidase                                              | 2.79  |
| b2263 | yfbB | Isolate 2 | non-essential | predicted peptidase                                              | 0.59  |
| b2264 | menD | Isolate 1 | non-essential | bifunctional 2-oxoglutarate decarboxylase -!- SHCHC synthase     | 0.97  |
| b2264 | menD | Isolate 2 | non-essential | bifunctional 2-oxoglutarate decarboxylase -!- SHCHC synthase     | 0.73  |
| b2265 | menF | Isolate 1 | non-essential | isochorismate synthase 2                                         | 0.02  |
| b2265 | menF | Isolate 2 | non-essential | isochorismate synthase 2                                         | -0.99 |
| b2266 | elaB | Isolate 1 | non-essential | conserved protein                                                | 3.41  |
| b2266 | elaB | Isolate 2 | non-essential | conserved protein                                                | 0.31  |
| b2267 | elaA | Isolate 1 | non-essential | predicted acyltransferase with acyl-CoA N-acyltransferase domain | 1.35  |
| b2267 | elaA | Isolate 2 | non-essential | predicted acyltransferase with acyl-CoA N-acyltransferase domain | 0.04  |
| b2268 | elaC | Isolate 1 | non-essential | binuclear zinc phosphodiesterase                                 | -1.00 |
| b2268 | elaC | Isolate 2 | non-essential | binuclear zinc phosphodiesterase                                 | 0.23  |
| b2269 | elaD | Isolate 1 | non-essential | predicted enzyme                                                 | 2.19  |
| b2269 | elaD | Isolate 2 | non-essential | predicted enzyme                                                 | 2.16  |
| b2270 | yfbK | Isolate 1 | non-essential | conserved protein                                                | -2.27 |
| b2270 | yfbK | Isolate 2 | non-essential | conserved protein                                                | 0.47  |
| b2271 | yfbL | Isolate 1 | non-essential | predicted peptidase                                              | -0.09 |
| b2271 | yfbL | Isolate 2 | non-essential | predicted peptidase                                              | 3.52  |
| b2272 | yfbM | Isolate 1 | non-essential | predicted protein                                                | -1.12 |
| b2272 | yfbM | Isolate 2 | non-essential | predicted protein                                                | -0.94 |
| b2273 | yfbN | Isolate 1 | non-essential | predicted protein                                                | 0.27  |
| b2273 | yfbN | Isolate 2 | non-essential | predicted protein                                                | 0.85  |
| b2274 | yfbO | Isolate 1 | non-essential | predicted protein                                                | -0.33 |
| b2274 | yfbO | Isolate 2 | non-essential | predicted protein                                                | 0.42  |
| b2275 | yfbP | Isolate 1 | non-essential | predicted protein                                                | 0.80  |
| b2275 | yfbP | Isolate 2 | non-essential | predicted protein                                                | -0.13 |
| b2276 | nuoN | Isolate 1 | non-essential | NADH:ubiquinone oxidoreductase, membrane subunit N               | 1.75  |
| b2276 | nuoN | Isolate 2 | non-essential | NADH:ubiquinone oxidoreductase, membrane subunit N               | 1.02  |
| b2277 | nuoM | Isolate 1 | non-essential | NADH:ubiquinone oxidoreductase, membrane subunit M               | -0.06 |
| b2277 | nuoM | Isolate 2 | non-essential | NADH:ubiquinone oxidoreductase, membrane subunit M               | 2.38  |
| b2278 | nuoL | Isolate 1 | non-essential | NADH:ubiquinone oxidoreductase, membrane subunit L               | 1.48  |
| b2278 | nuoL | Isolate 2 | non-essential | NADH:ubiquinone oxidoreductase, membrane subunit L               | 1.49  |
| b2279 | nuoK | Isolate 1 | non-essential | NADH:ubiquinone oxidoreductase, membrane subunit K               | -1.20 |
| b2279 | nuoK | Isolate 2 | non-essential | NADH:ubiquinone oxidoreductase, membrane subunit K               | -0.50 |
| b2280 | nuoJ | Isolate 1 | non-essential | NADH:ubiquinone oxidoreductase, membrane subunit J               | 3.04  |



|       |      |           |               |                                                    |       |
|-------|------|-----------|---------------|----------------------------------------------------|-------|
| b2280 | nuoJ | Isolate 2 | non-essential | NADH:ubiquinone oxidoreductase, membrane subunit J | -0.46 |
| b2281 | nuoI | Isolate 1 | non-essential | NADH:ubiquinone oxidoreductase, chain I            | 3.14  |
| b2281 | nuoI | Isolate 2 | non-essential | NADH:ubiquinone oxidoreductase, chain I            | 1.00  |
| b2282 | nuoH | Isolate 1 | non-essential | NADH:ubiquinone oxidoreductase, membrane subunit H | 1.10  |
| b2282 | nuoH | Isolate 2 | non-essential | NADH:ubiquinone oxidoreductase, membrane subunit H | 2.03  |
| b2283 | nuoG | Isolate 1 | non-essential | NADH:ubiquinone oxidoreductase, chain G            | 4.35  |
| b2283 | nuoG | Isolate 2 | non-essential | NADH:ubiquinone oxidoreductase, chain G            | 3.35  |
| b2284 | nuoF | Isolate 1 | non-essential | NADH:ubiquinone oxidoreductase, chain F            | 1.15  |
| b2284 | nuoF | Isolate 2 | non-essential | NADH:ubiquinone oxidoreductase, chain F            | 2.26  |
| b2285 | nuoE | Isolate 1 | non-essential | NADH:ubiquinone oxidoreductase, chain E            | 2.81  |
| b2285 | nuoE | Isolate 2 | non-essential | NADH:ubiquinone oxidoreductase, chain E            | 4.57  |
| b2286 | nuoC | Isolate 1 | non-essential | NADH:ubiquinone oxidoreductase, chain C,D          | 0.22  |
| b2286 | nuoC | Isolate 2 | non-essential | NADH:ubiquinone oxidoreductase, chain C,D          | 2.67  |
| b2287 | nuoB | Isolate 1 | non-essential | NADH:ubiquinone oxidoreductase, chain B            | -0.62 |
| b2287 | nuoB | Isolate 2 | non-essential | NADH:ubiquinone oxidoreductase, chain B            | 1.51  |
| b2288 | nuoA | Isolate 1 | non-essential | NADH:ubiquinone oxidoreductase, membrane subunit A | 2.73  |
| b2288 | nuoA | Isolate 2 | non-essential | NADH:ubiquinone oxidoreductase, membrane subunit A | 0.66  |
| b2289 | lrhA | Isolate 1 | non-essential | DNA-binding transcriptional repressor              | -0.77 |
| b2289 | lrhA | Isolate 2 | non-essential | DNA-binding transcriptional repressor              | -0.11 |
| b2290 | yfbQ | Isolate 1 | non-essential | predicted aminotransferase                         | 1.13  |
| b2290 | yfbQ | Isolate 2 | non-essential | predicted aminotransferase                         | -0.55 |
| b2291 | yfbR | Isolate 1 | non-essential | deoxyribonucleoside 5'-monophosphatase             | 0.50  |
| b2291 | yfbR | Isolate 2 | non-essential | deoxyribonucleoside 5'-monophosphatase             | -2.40 |
| b2292 | yfbS | Isolate 1 | non-essential | predicted transporter                              | -0.34 |
| b2292 | yfbS | Isolate 2 | non-essential | predicted transporter                              | -0.82 |
| b2293 | yfbT | Isolate 1 | non-essential | predicted hydrolase or phosphatase                 | 2.32  |
| b2293 | yfbT | Isolate 2 | non-essential | predicted hydrolase or phosphatase                 | -2.59 |
| b2294 | yfbU | Isolate 1 | non-essential | conserved protein                                  | 0.53  |
| b2294 | yfbU | Isolate 2 | non-essential | conserved protein                                  | -1.34 |
| b2295 | yfbV | Isolate 1 | non-essential | conserved inner membrane protein                   | -1.46 |
| b2295 | yfbV | Isolate 2 | non-essential | conserved inner membrane protein                   | -0.69 |
| b2296 | ackA | Isolate 1 | non-essential | acetate kinase A and propionate kinase 2           | -0.42 |
| b2296 | ackA | Isolate 2 | non-essential | acetate kinase A and propionate kinase 2           | -1.59 |
| b2297 | pta  | Isolate 1 | non-essential | phosphate acetyltransferase                        | -1.19 |
| b2297 | pta  | Isolate 2 | non-essential | phosphate acetyltransferase                        | 0.61  |
| b2298 | yfcC | Isolate 1 | non-essential | predicted inner membrane protein                   | -0.97 |
| b2298 | yfcC | Isolate 2 | non-essential | predicted inner membrane protein                   | 3.55  |
| b2299 | yfcD | Isolate 1 | non-essential | predicted NUDIX hydrolase                          | -0.52 |
| b2299 | yfcD | Isolate 2 | non-essential | predicted NUDIX hydrolase                          | -1.15 |
| b2300 | yfcE | Isolate 1 | non-essential | predicted phosphatase                              | -0.32 |
| b2300 | yfcE | Isolate 2 | non-essential | predicted phosphatase                              | -0.79 |
| b2301 | yfcF | Isolate 1 | non-essential | predicted enzyme                                   | 1.19  |
| b2301 | yfcF | Isolate 2 | non-essential | predicted enzyme                                   | 0.10  |

|       |      |           |               |                                                                                                                  |        |
|-------|------|-----------|---------------|------------------------------------------------------------------------------------------------------------------|--------|
| b2302 | yfcG | Isolate 1 | non-essential | predicted glutathione S-transferase                                                                              | 0.93   |
| b2302 | yfcG | Isolate 2 | non-essential | predicted glutathione S-transferase                                                                              | -2.23  |
| b2303 | folX | Isolate 1 | non-essential | D-erythro-7,8-dihydroneopterin triphosphate 2'-epimerase and dihydroneopterin aldolase                           | -0.10  |
| b2303 | folX | Isolate 2 | non-essential | D-erythro-7,8-dihydroneopterin triphosphate 2'-epimerase and dihydroneopterin aldolase                           | -0.32  |
| b2304 | yfcH | Isolate 1 | non-essential | conserved protein with NAD(P)-binding Rossmann-fold domain                                                       | 0.21   |
| b2304 | yfcH | Isolate 2 | non-essential | conserved protein with NAD(P)-binding Rossmann-fold domain                                                       | -0.46  |
| b2305 | yfcI | Isolate 1 | non-essential | conserved protein                                                                                                | -0.50  |
| b2305 | yfcI | Isolate 2 | non-essential | conserved protein                                                                                                | -1.47  |
| b2306 | hisP | Isolate 1 | non-essential | histidine/lysine/arginine/ornithine transporter subunit -!- ATP-binding component of ABC superfamily             | -3.29  |
| b2306 | hisP | Isolate 2 | non-essential | histidine/lysine/arginine/ornithine transporter subunit -!- ATP-binding component of ABC superfamily             | -1.74  |
| b2307 | hisM | Isolate 1 | non-essential | histidine/lysine/arginine/ornithine transporter subunit -!- membrane component of ABC superfamily                | -0.12  |
| b2307 | hisM | Isolate 2 | non-essential | histidine/lysine/arginine/ornithine transporter subunit -!- membrane component of ABC superfamily                | 0.47   |
| b2308 | hisQ | Isolate 1 | non-essential | histidine/lysine/arginine/ornithine transporter subunit -!- membrane component of ABC superfamily                | 0.61   |
| b2308 | hisQ | Isolate 2 | non-essential | histidine/lysine/arginine/ornithine transporter subunit -!- membrane component of ABC superfamily                | 0.33   |
| b2309 | hisJ | Isolate 1 | non-essential | histidine/lysine/arginine/ornithine transporter subunit -!- periplasmic-binding component of ABC superfamily     | 0.71   |
| b2309 | hisJ | Isolate 2 | non-essential | histidine/lysine/arginine/ornithine transporter subunit -!- periplasmic-binding component of ABC superfamily     | 0.87   |
| b2310 | argT | Isolate 1 | non-essential | lysine/arginine/ornithine transporter subunit -!- periplasmic-binding component of ABC superfamily               | 0.47   |
| b2310 | argT | Isolate 2 | non-essential | lysine/arginine/ornithine transporter subunit -!- periplasmic-binding component of ABC superfamily               | 0.02   |
| b2311 | ubiX | Isolate 1 | non-essential | 3-octaprenyl-4-hydroxybenzoate carboxy-lyase                                                                     | 2.05   |
| b2311 | ubiX | Isolate 2 | non-essential | 3-octaprenyl-4-hydroxybenzoate carboxy-lyase                                                                     | 3.61   |
| b2312 | purF | Isolate 1 | non-essential | amidophosphoribosyltransferase                                                                                   | -1.17  |
| b2312 | purF | Isolate 2 | non-essential | amidophosphoribosyltransferase                                                                                   | -1.56  |
| b2313 | cvpA | Isolate 1 | non-essential | membrane protein required for colicin V production                                                               | 2.37   |
| b2313 | cvpA | Isolate 2 | non-essential | membrane protein required for colicin V production                                                               | 0.88   |
| b2314 | dedD | Isolate 1 | non-essential | conserved protein                                                                                                | 1.28   |
| b2314 | dedD | Isolate 2 | non-essential | conserved protein                                                                                                | 4.72   |
| b2315 | folC | Isolate 1 | essential     | bifunctional folylpolyglutamate synthase -!- dihydrofolate synthase                                              | -1.20  |
| b2316 | accD | Isolate 1 | essential     | acetylCoA carboxylase, beta (carboxyltransferase) subunit                                                        | 0.77   |
| b2317 | dedA | Isolate 1 | non-essential | conserved inner membrane protein                                                                                 | 0.46   |
| b2317 | dedA | Isolate 2 | non-essential | conserved inner membrane protein                                                                                 | 0.23   |
| b2318 | truA | Isolate 1 | non-essential | pseudouridylate synthase I                                                                                       | 0.41   |
| b2318 | truA | Isolate 2 | non-essential | pseudouridylate synthase I                                                                                       | 2.53   |
| b2319 | usg  | Isolate 1 | non-essential | predicted semialdehyde dehydrogenase                                                                             | 1.28   |
| b2319 | usg  | Isolate 2 | non-essential | predicted semialdehyde dehydrogenase                                                                             | 1.57   |
| b2320 | pdxB | Isolate 1 | non-essential | erythronate-4-phosphate dehydrogenase                                                                            | 2.19   |
| b2320 | pdxB | Isolate 2 | non-essential | erythronate-4-phosphate dehydrogenase                                                                            | 1.24   |
| b2321 | flk  | Isolate 1 | non-essential | predicted flagella assembly protein                                                                              | -0.64  |
| b2321 | flk  | Isolate 2 | non-essential | predicted flagella assembly protein                                                                              | 0.77   |
| b2322 | yfcJ | Isolate 1 | non-essential | predicted transporter                                                                                            | -0.16  |
| b2322 | yfcJ | Isolate 2 | non-essential | predicted transporter                                                                                            | -10.45 |
| b2323 | fabB | Isolate 1 | essential     | 3-oxoacyl-[acyl-carrier-protein] synthase I                                                                      | -1.93  |
| b2324 | trmC | Isolate 1 | non-essential | fused 5-methylaminomethyl-2-thiouridine forming enzyme methyltransferase -!- FAD-dependent demodification enzyme | 0.95   |
| b2324 | trmC | Isolate 2 | non-essential | fused 5-methylaminomethyl-2-thiouridine forming enzyme methyltransferase -!- FAD-dependent demodification enzyme | 1.92   |

|       |      |           |               |                                                                                                                                |       |
|-------|------|-----------|---------------|--------------------------------------------------------------------------------------------------------------------------------|-------|
| b2325 | yfcL | Isolate 1 | non-essential | predicted protein                                                                                                              | -0.35 |
| b2325 | yfcL | Isolate 2 | non-essential | predicted protein                                                                                                              | -1.86 |
| b2326 | yfcM | Isolate 1 | non-essential | conserved protein                                                                                                              | -1.71 |
| b2326 | yfcM | Isolate 2 | non-essential | conserved protein                                                                                                              | -0.48 |
| b2327 | yfcA | Isolate 1 | non-essential | conserved inner membrane protein                                                                                               | -0.69 |
| b2327 | yfcA | Isolate 2 | non-essential | conserved inner membrane protein                                                                                               | -0.78 |
| b2328 | mepA | Isolate 1 | non-essential | murein DD-endopeptidase                                                                                                        | 2.06  |
| b2328 | mepA | Isolate 2 | non-essential | murein DD-endopeptidase                                                                                                        | -1.58 |
| b2329 | aroC | Isolate 1 | non-essential | chorismate synthase                                                                                                            | 6.15  |
| b2329 | aroC | Isolate 2 | non-essential | chorismate synthase                                                                                                            | -1.20 |
| b2330 | prmB | Isolate 1 | non-essential | N5-glutamine methyltransferase                                                                                                 | 1.14  |
| b2330 | prmB | Isolate 2 | non-essential | N5-glutamine methyltransferase                                                                                                 | 0.08  |
| b2331 | yfcN | Isolate 1 | non-essential | conserved protein                                                                                                              | -5.04 |
| b2331 | yfcN | Isolate 2 | non-essential | conserved protein                                                                                                              | 0.82  |
| b2332 | yfcO | Isolate 1 | non-essential | predicted protein                                                                                                              | -0.97 |
| b2332 | yfcO | Isolate 2 | non-essential | predicted protein                                                                                                              | -0.32 |
| b2333 | yfcP | Isolate 1 | non-essential | predicted fimbrial-like adhesin protein                                                                                        | -0.47 |
| b2333 | yfcP | Isolate 2 | non-essential | predicted fimbrial-like adhesin protein                                                                                        | -2.00 |
| b2334 | yfcQ | Isolate 1 | non-essential | predicted fimbrial-like adhesin protein                                                                                        | 1.29  |
| b2334 | yfcQ | Isolate 2 | non-essential | predicted fimbrial-like adhesin protein                                                                                        | 0.74  |
| b2335 | yfcR | Isolate 1 | non-essential | predicted fimbrial-like adhesin protein                                                                                        | 0.96  |
| b2335 | yfcR | Isolate 2 | non-essential | predicted fimbrial-like adhesin protein                                                                                        | -0.65 |
| b2336 | yfcS | Isolate 1 | non-essential | predicted periplasmic pilus chaperone                                                                                          | 0.97  |
| b2336 | yfcS | Isolate 2 | non-essential | predicted periplasmic pilus chaperone                                                                                          | 2.00  |
| b2337 | yfcT | Isolate 1 | non-essential | predicted outer membrane export usher protein                                                                                  | -0.76 |
| b2337 | yfcT | Isolate 2 | non-essential | predicted outer membrane export usher protein                                                                                  | 0.29  |
| b2338 | yfcU | Isolate 1 | non-essential | predicted export usher protein                                                                                                 | -1.83 |
| b2338 | yfcU | Isolate 2 | non-essential | predicted export usher protein                                                                                                 | -2.00 |
| b2339 | yfcV | Isolate 1 | non-essential | predicted fimbrial-like adhesin protein                                                                                        | -0.64 |
| b2339 | yfcV | Isolate 2 | non-essential | predicted fimbrial-like adhesin protein                                                                                        | 0.84  |
| b2340 | sixA | Isolate 1 | non-essential | phosphohistidine phosphatase                                                                                                   | 2.28  |
| b2340 | sixA | Isolate 2 | non-essential | phosphohistidine phosphatase                                                                                                   | 0.64  |
| b2341 | yfcX | Isolate 1 | non-essential | fused enoyl-CoA hydratase-!-epimerase-!-isomerase -!- 3-hydroxyacyl-CoA dehydrogenase, subunit of anaerobic fatty acid oxidati | -1.05 |
| b2341 | yfcX | Isolate 2 | non-essential | fused enoyl-CoA hydratase-!-epimerase-!-isomerase -!- 3-hydroxyacyl-CoA dehydrogenase, subunit of anaerobic fatty acid oxidati | 1.17  |
| b2342 | yfcY | Isolate 1 | non-essential | beta-ketoacyl-CoA thiolase, anaerobic, subunit                                                                                 | -1.62 |
| b2342 | yfcY | Isolate 2 | non-essential | beta-ketoacyl-CoA thiolase, anaerobic, subunit                                                                                 | 2.33  |
| b2343 | yfcZ | Isolate 1 | non-essential | conserved protein                                                                                                              | 0.11  |
| b2343 | yfcZ | Isolate 2 | non-essential | conserved protein                                                                                                              | 0.78  |
| b2344 | fadL | Isolate 1 | non-essential | long-chain fatty acid outer membrane transporter                                                                               | -0.78 |
| b2344 | fadL | Isolate 2 | non-essential | long-chain fatty acid outer membrane transporter                                                                               | -0.11 |
| b2345 | yfdF | Isolate 1 | non-essential | predicted protein                                                                                                              | 2.46  |
| b2345 | yfdF | Isolate 2 | non-essential | predicted protein                                                                                                              | -0.80 |
| b2346 | vacJ | Isolate 1 | non-essential | predicted lipoprotein                                                                                                          | 2.99  |

|       |      |           |               |                                                                                |       |
|-------|------|-----------|---------------|--------------------------------------------------------------------------------|-------|
| b2346 | vacJ | Isolate 2 | non-essential | predicted lipoprotein                                                          | 2.56  |
| b2347 | yfdC | Isolate 1 | non-essential | predicted inner membrane protein                                               | -0.03 |
| b2347 | yfdC | Isolate 2 | non-essential | predicted inner membrane protein                                               | 0.58  |
| b2349 | intS | Isolate 1 | non-essential | CPS-53 (KpLE1) prophage; predicted prophage CPS-53 integrase                   | 1.24  |
| b2349 | intS | Isolate 2 | non-essential | CPS-53 (KpLE1) prophage; predicted prophage CPS-53 integrase                   | -0.90 |
| b2350 | yfdG | Isolate 1 | non-essential | CPS-53 (KpLE1) prophage; bactoprenol-linked glucose translocase (flippase)     | -1.38 |
| b2350 | yfdG | Isolate 2 | non-essential | CPS-53 (KpLE1) prophage; bactoprenol-linked glucose translocase (flippase)     | 0.47  |
| b2351 | yfdH | Isolate 1 | non-essential | CPS-53 (KpLE1) prophage; bactoprenol glucosyl transferase                      | 0.83  |
| b2351 | yfdH | Isolate 2 | non-essential | CPS-53 (KpLE1) prophage; bactoprenol glucosyl transferase                      | 2.14  |
| b2352 | yfdI | Isolate 1 | non-essential | CPS-53 (KpLE1) prophage; predicted inner membrane protein                      | -2.45 |
| b2352 | yfdI | Isolate 2 | non-essential | CPS-53 (KpLE1) prophage; predicted inner membrane protein                      | -1.22 |
| b2353 | tfaS | Isolate 1 | *             | CPS-53 (KpLE1) prophage; tail fiber assembly protein fragment (pseudogene)     | 0.75  |
| b2353 | tfaS | Isolate 2 | *             | CPS-53 (KpLE1) prophage; tail fiber assembly protein fragment (pseudogene)     | 0.37  |
| b2354 | yfdK | Isolate 1 | non-essential | CPS-53 (KpLE1) prophage; conserved protein                                     | -2.23 |
| b2354 | yfdK | Isolate 2 | non-essential | CPS-53 (KpLE1) prophage; conserved protein                                     | -1.33 |
| b2355 | yfdL | Isolate 1 | non-essential | CPS-53 (KpLE1) prophage; conserved protein                                     | 0.60  |
| b2355 | yfdL | Isolate 2 | non-essential | CPS-53 (KpLE1) prophage; conserved protein                                     | -4.18 |
| b2356 | yfdM | Isolate 1 | non-essential | CPS-53 (KpLE1) prophage; predicted methyltransferase                           | -0.83 |
| b2356 | yfdM | Isolate 2 | non-essential | CPS-53 (KpLE1) prophage; predicted methyltransferase                           | -2.36 |
| b2357 | yfdN | Isolate 1 | non-essential | CPS-53 (KpLE1) prophage; predicted protein                                     | -1.82 |
| b2357 | yfdN | Isolate 2 | non-essential | CPS-53 (KpLE1) prophage; predicted protein                                     | 0.48  |
| b2358 | yfdO | Isolate 1 | non-essential | CPS-53 (KpLE1) prophage; predicted defective phage replication protein O       | -0.49 |
| b2358 | yfdO | Isolate 2 | non-essential | CPS-53 (KpLE1) prophage; predicted defective phage replication protein O       | -0.57 |
| b2359 | yfdP | Isolate 1 | non-essential | CPS-53 (KpLE1) prophage; predicted protein                                     | -1.24 |
| b2359 | yfdP | Isolate 2 | non-essential | CPS-53 (KpLE1) prophage; predicted protein                                     | -2.58 |
| b2360 | yfdQ | Isolate 1 | non-essential | CPS-53 (KpLE1) prophage; predicted protein                                     | -1.51 |
| b2360 | yfdQ | Isolate 2 | non-essential | CPS-53 (KpLE1) prophage; predicted protein                                     | -0.27 |
| b2361 | yfdR | Isolate 1 | non-essential | CPS-53 (KpLE1) prophage; conserved protein                                     | -0.79 |
| b2361 | yfdR | Isolate 2 | non-essential | CPS-53 (KpLE1) prophage; conserved protein                                     | 1.32  |
| b2362 | yfdS | Isolate 1 | non-essential | CPS-53 (KpLE1) prophage; predicted protein                                     | 0.84  |
| b2362 | yfdS | Isolate 2 | non-essential | CPS-53 (KpLE1) prophage; predicted protein                                     | -0.69 |
| b2364 | dsdC | Isolate 1 | non-essential | DNA-binding transcriptional dual regulator                                     | 1.10  |
| b2364 | dsdC | Isolate 2 | non-essential | DNA-binding transcriptional dual regulator                                     | 3.30  |
| b2365 | dsdX | Isolate 1 | non-essential | predicted transporter                                                          | -0.63 |
| b2365 | dsdX | Isolate 2 | non-essential | predicted transporter                                                          | 0.07  |
| b2366 | dsdA | Isolate 1 | non-essential | D-serine ammonia-lyase                                                         | -0.53 |
| b2366 | dsdA | Isolate 2 | non-essential | D-serine ammonia-lyase                                                         | 1.07  |
| b2367 | emrY | Isolate 1 | non-essential | predicted multidrug efflux system                                              | 1.22  |
| b2367 | emrY | Isolate 2 | non-essential | predicted multidrug efflux system                                              | 0.37  |
| b2368 | emrK | Isolate 1 | non-essential | EmrKY-TolC multidrug resistance efflux pump, membrane fusion protein component | 0.43  |
| b2368 | emrK | Isolate 2 | non-essential | EmrKY-TolC multidrug resistance efflux pump, membrane fusion protein component | -0.29 |
| b2369 | evgA | Isolate 1 | non-essential | DNA-binding response regulator in two-component regulatory system with EvgS    | -2.18 |
| b2369 | evgA | Isolate 2 | non-essential | DNA-binding response regulator in two-component regulatory system with EvgS    | 0.20  |

|       |      |           |               |                                                                                           |        |
|-------|------|-----------|---------------|-------------------------------------------------------------------------------------------|--------|
| b2370 | evgS | Isolate 1 | non-essential | hybrid sensory histidine kinase in two-component regulatory system with EvgA              | -1.31  |
| b2370 | evgS | Isolate 2 | non-essential | hybrid sensory histidine kinase in two-component regulatory system with EvgA              | -0.39  |
| b2371 | yfdE | Isolate 1 | non-essential | predicted CoA-transferase, NAD(P)-binding                                                 | 0.09   |
| b2371 | yfdE | Isolate 2 | non-essential | predicted CoA-transferase, NAD(P)-binding                                                 | 0.32   |
| b2372 | yfdV | Isolate 1 | non-essential | predicted transporter                                                                     | -0.33  |
| b2372 | yfdV | Isolate 2 | non-essential | predicted transporter                                                                     | -0.83  |
| b2373 | oxc  | Isolate 1 | non-essential | predicted oxalyl-CoA decarboxylase                                                        | 0.12   |
| b2373 | oxc  | Isolate 2 | non-essential | predicted oxalyl-CoA decarboxylase                                                        | 0.70   |
| b2374 | frc  | Isolate 1 | non-essential | formyl-CoA transferase, NAD(P)-binding                                                    | -11.79 |
| b2374 | frc  | Isolate 2 | non-essential | formyl-CoA transferase, NAD(P)-binding                                                    | 0.52   |
| b2375 | yfdX | Isolate 1 | non-essential | predicted protein                                                                         | 0.41   |
| b2375 | yfdX | Isolate 2 | non-essential | predicted protein                                                                         | 0.41   |
| b2376 | ypdI | Isolate 1 | non-essential | predicted lipoprotein involved in colanic acid biosynthesis                               | -11.11 |
| b2376 | ypdI | Isolate 2 | non-essential | predicted lipoprotein involved in colanic acid biosynthesis                               | -0.55  |
| b2377 | yfdY | Isolate 1 | non-essential | predicted inner membrane protein                                                          | -1.00  |
| b2377 | yfdY | Isolate 2 | non-essential | predicted inner membrane protein                                                          | 0.02   |
| b2378 | ddg  | Isolate 1 | non-essential | palmitoleoyl-acyl carrier protein (ACP)-dependent acyltransferase                         | -0.52  |
| b2378 | ddg  | Isolate 2 | non-essential | palmitoleoyl-acyl carrier protein (ACP)-dependent acyltransferase                         | 2.52   |
| b2379 | yfdZ | Isolate 1 | non-essential | predicted aminotransferase, PLP-dependent                                                 | 2.29   |
| b2379 | yfdZ | Isolate 2 | non-essential | predicted aminotransferase, PLP-dependent                                                 | -0.73  |
| b2380 | ypdA | Isolate 1 | non-essential | predicted sensory kinase in two-component system with YpdB                                | -1.78  |
| b2380 | ypdA | Isolate 2 | non-essential | predicted sensory kinase in two-component system with YpdB                                | -0.45  |
| b2381 | ypdB | Isolate 1 | non-essential | predicted response regulator in two-component system with YpdA                            | 1.97   |
| b2381 | ypdB | Isolate 2 | non-essential | predicted response regulator in two-component system with YpdA                            | -0.14  |
| b2382 | ypdC | Isolate 1 | non-essential | predicted DNA-binding protein                                                             | -0.94  |
| b2382 | ypdC | Isolate 2 | non-essential | predicted DNA-binding protein                                                             | -2.22  |
| b2383 | ypdD | Isolate 1 | non-essential | fused predicted PTS enzymes Hpr component -!- enzyme I component -!- enzyme IIA component | 1.86   |
| b2383 | ypdD | Isolate 2 | non-essential | fused predicted PTS enzymes Hpr component -!- enzyme I component -!- enzyme IIA component | 0.08   |
| b2384 | ypdE | Isolate 1 | non-essential | predicted peptidase                                                                       | -0.75  |
| b2384 | ypdE | Isolate 2 | non-essential | predicted peptidase                                                                       | 2.00   |
| b2385 | ypdF | Isolate 1 | non-essential | predicted peptidase                                                                       | 0.73   |
| b2385 | ypdF | Isolate 2 | non-essential | predicted peptidase                                                                       | -0.44  |
| b2386 | ypdG | Isolate 1 | non-essential | predicted enzyme IIC component of PTS                                                     | -0.26  |
| b2386 | ypdG | Isolate 2 | non-essential | predicted enzyme IIC component of PTS                                                     | -0.29  |
| b2387 | ypdH | Isolate 1 | non-essential | predicted enzyme IIB component of PTS                                                     | -0.10  |
| b2387 | ypdH | Isolate 2 | non-essential | predicted enzyme IIB component of PTS                                                     | 0.56   |
| b2388 | glk  | Isolate 1 | non-essential | glucokinase                                                                               | 2.07   |
| b2388 | glk  | Isolate 2 | non-essential | glucokinase                                                                               | 2.67   |
| b2389 | yfeO | Isolate 1 | non-essential | predicted ion channel protein                                                             | 0.59   |
| b2389 | yfeO | Isolate 2 | non-essential | predicted ion channel protein                                                             | -0.14  |
| b2390 | ypeC | Isolate 1 | non-essential | conserved protein                                                                         | 2.87   |
| b2390 | ypeC | Isolate 2 | non-essential | conserved protein                                                                         | 0.12   |
| b2392 | mntH | Isolate 1 | non-essential | manganese/divalent cation transporter                                                     | 0.23   |

|       |      |           |               |                                                                                      |       |
|-------|------|-----------|---------------|--------------------------------------------------------------------------------------|-------|
| b2392 | mntH | Isolate 2 | non-essential | manganese/divalent cation transporter                                                | 2.53  |
| b2393 | nupC | Isolate 1 | non-essential | nucleoside (except guanosine) transporter                                            | 1.20  |
| b2393 | nupC | Isolate 2 | non-essential | nucleoside (except guanosine) transporter                                            | -1.13 |
| b2395 | yfeA | Isolate 1 | non-essential | predicted diguanylate cyclase                                                        | -1.61 |
| b2395 | yfeA | Isolate 2 | non-essential | predicted diguanylate cyclase                                                        | -0.94 |
| b2398 | yfeC | Isolate 1 | non-essential | predicted DNA-binding transcriptional regulator                                      | 1.64  |
| b2398 | yfeC | Isolate 2 | non-essential | predicted DNA-binding transcriptional regulator                                      | 0.96  |
| b2399 | yfeD | Isolate 1 | non-essential | predicted DNA-binding transcriptional regulator                                      | 0.60  |
| b2399 | yfeD | Isolate 2 | non-essential | predicted DNA-binding transcriptional regulator                                      | -0.62 |
| b2400 | gltX | Isolate 1 | essential     | glutamyl-tRNA synthetase                                                             | 0.80  |
| b2405 | xapR | Isolate 1 | non-essential | DNA-binding transcriptional activator                                                | 0.61  |
| b2405 | xapR | Isolate 2 | non-essential | DNA-binding transcriptional activator                                                | -0.01 |
| b2406 | xapB | Isolate 1 | non-essential | xanthosine transporter                                                               | 0.69  |
| b2406 | xapB | Isolate 2 | non-essential | xanthosine transporter                                                               | 3.43  |
| b2407 | xapA | Isolate 1 | non-essential | purine nucleoside phosphorylase II                                                   | 0.41  |
| b2407 | xapA | Isolate 2 | non-essential | purine nucleoside phosphorylase II                                                   | 0.49  |
| b2408 | yfeN | Isolate 1 | non-essential | conserved outer membrane protein                                                     | 2.19  |
| b2408 | yfeN | Isolate 2 | non-essential | conserved outer membrane protein                                                     | 1.25  |
| b2409 | yfeR | Isolate 1 | non-essential | predicted DNA-binding transcriptional regulator                                      | -1.40 |
| b2409 | yfeR | Isolate 2 | non-essential | predicted DNA-binding transcriptional regulator                                      | 0.25  |
| b2410 | yfeH | Isolate 1 | non-essential | predicted inner membrane protein                                                     | -0.08 |
| b2410 | yfeH | Isolate 2 | non-essential | predicted inner membrane protein                                                     | 0.15  |
| b2411 | ligA | Isolate 1 | essential     | DNA ligase, NAD(+)-dependent                                                         | -0.13 |
| b2413 | cysZ | Isolate 1 | non-essential | predicted inner membrane protein                                                     | 1.18  |
| b2413 | cysZ | Isolate 2 | non-essential | predicted inner membrane protein                                                     | 0.98  |
| b2414 | cysK | Isolate 1 | non-essential | cysteine synthase A, O-acetylserine sulfhydrylase A subunit                          | -0.97 |
| b2414 | cysK | Isolate 2 | non-essential | cysteine synthase A, O-acetylserine sulfhydrylase A subunit                          | -1.87 |
| b2415 | ptsH | Isolate 1 | non-essential | phosphohistidinoprotein-hexose phosphotransferase component of PTS system (Hpr)      | -0.78 |
| b2415 | ptsH | Isolate 2 | non-essential | phosphohistidinoprotein-hexose phosphotransferase component of PTS system (Hpr)      | 0.57  |
| b2416 | ptsI | Isolate 1 | non-essential | PEP-protein phosphotransferase of PTS system (enzyme I)                              | 1.14  |
| b2416 | ptsI | Isolate 2 | non-essential | PEP-protein phosphotransferase of PTS system (enzyme I)                              | -2.14 |
| b2417 | crr  | Isolate 1 | non-essential | glucose-specific enzyme IIA component of PTS                                         | -1.23 |
| b2417 | crr  | Isolate 2 | non-essential | glucose-specific enzyme IIA component of PTS                                         | -1.63 |
| b2418 | pdxK | Isolate 1 | non-essential | pyridoxal-pyridoxamine kinase/hydroxymethylpyrimidine kinase                         | 0.34  |
| b2418 | pdxK | Isolate 2 | non-essential | pyridoxal-pyridoxamine kinase/hydroxymethylpyrimidine kinase                         | 0.45  |
| b2419 | yfeK | Isolate 1 | non-essential | predicted protein                                                                    | 0.83  |
| b2419 | yfeK | Isolate 2 | non-essential | predicted protein                                                                    | -1.67 |
| b2420 | yfeS | Isolate 1 | non-essential | conserved protein                                                                    | 0.22  |
| b2420 | yfeS | Isolate 2 | non-essential | conserved protein                                                                    | 1.59  |
| b2421 | cysM | Isolate 1 | non-essential | cysteine synthase B (O-acetylserine sulfhydrylase B)                                 | -2.07 |
| b2421 | cysM | Isolate 2 | non-essential | cysteine synthase B (O-acetylserine sulfhydrylase B)                                 | -5.23 |
| b2422 | cysA | Isolate 1 | non-essential | sulfate/thiosulfate transporter subunit -!- ATP-binding component of ABC superfamily | 0.72  |
| b2422 | cysA | Isolate 2 | non-essential | sulfate/thiosulfate transporter subunit -!- ATP-binding component of ABC superfamily | 0.47  |

|       |      |           |               |                                                                                          |       |
|-------|------|-----------|---------------|------------------------------------------------------------------------------------------|-------|
| b2423 | cysW | Isolate 1 | non-essential | sulfate/thiosulfate transporter subunit -!- membrane component of ABC superfamily        | -0.54 |
| b2423 | cysW | Isolate 2 | non-essential | sulfate/thiosulfate transporter subunit -!- membrane component of ABC superfamily        | 0.08  |
| b2424 | cysU | Isolate 1 | non-essential | sulfate/thiosulfate transporter subunit -!- membrane component of ABC superfamily        | 1.64  |
| b2424 | cysU | Isolate 2 | non-essential | sulfate/thiosulfate transporter subunit -!- membrane component of ABC superfamily        | 1.73  |
| b2425 | cysP | Isolate 1 | non-essential | thiosulfate transporter subunit -!- periplasmic-binding component of ABC superfamily     | -1.28 |
| b2425 | cysP | Isolate 2 | non-essential | thiosulfate transporter subunit -!- periplasmic-binding component of ABC superfamily     | 1.46  |
| b2426 | ucpA | Isolate 1 | non-essential | predicted oxidoreductase, sulfate metabolism protein                                     | 0.81  |
| b2426 | ucpA | Isolate 2 | non-essential | predicted oxidoreductase, sulfate metabolism protein                                     | 0.60  |
| b2427 | yfeT | Isolate 1 | non-essential | predicted DNA-binding transcriptional regulator                                          | -0.36 |
| b2427 | yfeT | Isolate 2 | non-essential | predicted DNA-binding transcriptional regulator                                          | 2.21  |
| b2428 | yfeU | Isolate 1 | non-essential | predicted PTS component                                                                  | -0.14 |
| b2428 | yfeU | Isolate 2 | non-essential | predicted PTS component                                                                  | 1.15  |
| b2429 | murP | Isolate 1 | non-essential | fused predicted enzyme IIBC components of PTS                                            | -0.68 |
| b2429 | murP | Isolate 2 | non-essential | fused predicted enzyme IIBC components of PTS                                            | 0.04  |
| b2430 | yfeW | Isolate 1 | non-essential | predicted periplasmic esterase                                                           | -0.46 |
| b2430 | yfeW | Isolate 2 | non-essential | predicted periplasmic esterase                                                           | -0.60 |
| b2431 | yfeX | Isolate 1 | non-essential | conserved protein                                                                        | -0.14 |
| b2431 | yfeX | Isolate 2 | non-essential | conserved protein                                                                        | 1.07  |
| b2432 | yfeY | Isolate 1 | non-essential | predicted protein                                                                        | -0.47 |
| b2432 | yfeY | Isolate 2 | non-essential | predicted protein                                                                        | 0.54  |
| b2433 | yfeZ | Isolate 1 | non-essential | predicted inner membrane protein                                                         | -1.21 |
| b2433 | yfeZ | Isolate 2 | non-essential | predicted inner membrane protein                                                         | -1.75 |
| b2434 | ypeA | Isolate 1 | non-essential | predicted acyltransferase with acyl-CoA N-acyltransferase domain                         | -0.89 |
| b2434 | ypeA | Isolate 2 | non-essential | predicted acyltransferase with acyl-CoA N-acyltransferase domain                         | -0.01 |
| b2435 | amiA | Isolate 1 | non-essential | N-acetylmuramoyl-l-alanine amidase I                                                     | 0.80  |
| b2435 | amiA | Isolate 2 | non-essential | N-acetylmuramoyl-l-alanine amidase I                                                     | -1.63 |
| b2436 | hemF | Isolate 1 | non-essential | coproporphyrinogen III oxidase                                                           | -0.03 |
| b2436 | hemF | Isolate 2 | non-essential | coproporphyrinogen III oxidase                                                           | -0.25 |
| b2437 | yfeG | Isolate 1 | non-essential | predicted DNA-binding transcriptional regulator                                          | -0.90 |
| b2437 | yfeG | Isolate 2 | non-essential | predicted DNA-binding transcriptional regulator                                          | 1.35  |
| b2438 | yffI | Isolate 1 | non-essential | predicted carboxysome structural protein with predicted role in ethanolamine utilization | 0.54  |
| b2438 | yffI | Isolate 2 | non-essential | predicted carboxysome structural protein with predicted role in ethanolamine utilization | 1.48  |
| b2439 | eutL | Isolate 1 | non-essential | predicted carboxysome structural protein with predicted role in ethanolamine utilization | -5.95 |
| b2439 | eutL | Isolate 2 | non-essential | predicted carboxysome structural protein with predicted role in ethanolamine utilization | -0.08 |
| b2440 | eutC | Isolate 1 | non-essential | ethanolamine ammonia-lyase, small subunit (light chain)                                  | -0.45 |
| b2440 | eutC | Isolate 2 | non-essential | ethanolamine ammonia-lyase, small subunit (light chain)                                  | -1.76 |
| b2441 | eutB | Isolate 1 | non-essential | ethanolamine ammonia-lyase, large subunit, heavy chain                                   | -0.43 |
| b2441 | eutB | Isolate 2 | non-essential | ethanolamine ammonia-lyase, large subunit, heavy chain                                   | -0.16 |
| b2451 | eutA | Isolate 1 | non-essential | reactivating factor for ethanolamine ammonia lyase                                       | -0.09 |
| b2451 | eutA | Isolate 2 | non-essential | reactivating factor for ethanolamine ammonia lyase                                       | -1.65 |
| b2452 | eutH | Isolate 1 | non-essential | predicted inner membrane protein                                                         | -2.53 |
| b2452 | eutH | Isolate 2 | non-essential | predicted inner membrane protein                                                         | 0.60  |
| b2453 | eutG | Isolate 1 | non-essential | predicted alcohol dehydrogenase in ethanolamine utilization                              | 0.39  |

|       |      |           |               |                                                                                             |       |
|-------|------|-----------|---------------|---------------------------------------------------------------------------------------------|-------|
| b2453 | eutG | Isolate 2 | non-essential | predicted alcohol dehydrogenase in ethanolamine utilization                                 | -0.64 |
| b2454 | eutJ | Isolate 1 | non-essential | predicted chaperonin, ethanolamine utilization protein                                      | 1.84  |
| b2454 | eutJ | Isolate 2 | non-essential | predicted chaperonin, ethanolamine utilization protein                                      | 0.66  |
| b2455 | eutE | Isolate 1 | non-essential | predicted aldehyde dehydrogenase, ethanolamine utilization protein                          | -1.20 |
| b2455 | eutE | Isolate 2 | non-essential | predicted aldehyde dehydrogenase, ethanolamine utilization protein                          | -0.33 |
| b2456 | cchB | Isolate 1 | non-essential | predicted carboxysome structural protein, ethanolamine utilization protein                  | 0.73  |
| b2456 | cchB | Isolate 2 | non-essential | predicted carboxysome structural protein, ethanolamine utilization protein                  | -0.60 |
| b2457 | cchA | Isolate 1 | non-essential | predicted carboxysome structural protein, ethanolamine utilization protein                  | 0.38  |
| b2457 | cchA | Isolate 2 | non-essential | predicted carboxysome structural protein, ethanolamine utilization protein                  | 1.97  |
| b2458 | eutI | Isolate 1 | non-essential | predicted phosphotransacetylase subunit                                                     | 2.08  |
| b2458 | eutI | Isolate 2 | non-essential | predicted phosphotransacetylase subunit                                                     | -0.71 |
| b2459 | eutT | Isolate 1 | non-essential | predicted cobalamin adenosyltransferase in ethanolamine utilization                         | 0.97  |
| b2459 | eutT | Isolate 2 | non-essential | predicted cobalamin adenosyltransferase in ethanolamine utilization                         | -1.84 |
| b2460 | eutQ | Isolate 1 | non-essential | conserved protein                                                                           | -0.13 |
| b2460 | eutQ | Isolate 2 | non-essential | conserved protein                                                                           | -0.95 |
| b2461 | eutP | Isolate 1 | non-essential | conserved protein with nucleoside triphosphate hydrolase domain                             | 2.00  |
| b2461 | eutP | Isolate 2 | non-essential | conserved protein with nucleoside triphosphate hydrolase domain                             | -0.41 |
| b2462 | ypfE | Isolate 1 | non-essential | predicted carboxysome structural protein with predicted role in ethanol utilization         | 1.02  |
| b2462 | ypfE | Isolate 2 | non-essential | predicted carboxysome structural protein with predicted role in ethanol utilization         | -1.21 |
| b2463 | maeB | Isolate 1 | non-essential | fused malic enzyme predicted oxidoreductase -!- predicted phosphotransacetylase             | 1.37  |
| b2463 | maeB | Isolate 2 | non-essential | fused malic enzyme predicted oxidoreductase -!- predicted phosphotransacetylase             | 1.93  |
| b2464 | talA | Isolate 1 | non-essential | transaldolase A                                                                             | 0.09  |
| b2464 | talA | Isolate 2 | non-essential | transaldolase A                                                                             | 0.14  |
| b2465 | tktB | Isolate 1 | non-essential | transketolase 2, thiamin-binding                                                            | -0.03 |
| b2465 | tktB | Isolate 2 | non-essential | transketolase 2, thiamin-binding                                                            | -0.32 |
| b2466 | ypfG | Isolate 1 | non-essential | predicted protein                                                                           | -0.68 |
| b2466 | ypfG | Isolate 2 | non-essential | predicted protein                                                                           | -1.29 |
| b2467 | yffH | Isolate 1 | non-essential | predicted NUDIX hydrolase                                                                   | -0.19 |
| b2467 | yffH | Isolate 2 | non-essential | predicted NUDIX hydrolase                                                                   | -0.14 |
| b2468 | aegA | Isolate 1 | non-essential | fused predicted FeS binding subunit -!- predicted NAD/FAD-binding subunit of oxidoreductase | 0.63  |
| b2468 | aegA | Isolate 2 | non-essential | fused predicted FeS binding subunit -!- predicted NAD/FAD-binding subunit of oxidoreductase | -0.06 |
| b2469 | narQ | Isolate 1 | non-essential | sensory histidine kinase in two-component regulatory system with NarP (NarL)                | 0.57  |
| b2469 | narQ | Isolate 2 | non-essential | sensory histidine kinase in two-component regulatory system with NarP (NarL)                | -2.28 |
| b2470 | acrD | Isolate 1 | non-essential | aminoglycoside/multidrug efflux system                                                      | 0.11  |
| b2470 | acrD | Isolate 2 | non-essential | aminoglycoside/multidrug efflux system                                                      | 0.89  |
| b2471 | yffB | Isolate 1 | non-essential | conserved protein                                                                           | 1.39  |
| b2471 | yffB | Isolate 2 | non-essential | conserved protein                                                                           | 0.10  |
| b2473 | ypfH | Isolate 1 | non-essential | predicted hydrolase                                                                         | -1.63 |
| b2473 | ypfH | Isolate 2 | non-essential | predicted hydrolase                                                                         | -0.25 |
| b2474 | ypfI | Isolate 1 | non-essential | predicted hydrolase                                                                         | -1.95 |
| b2474 | ypfI | Isolate 2 | non-essential | predicted hydrolase                                                                         | 1.50  |
| b2475 | ypfJ | Isolate 1 | non-essential | conserved protein                                                                           | 0.53  |
| b2475 | ypfJ | Isolate 2 | non-essential | conserved protein                                                                           | 0.79  |



|       |      |           |               |                                                                             |       |
|-------|------|-----------|---------------|-----------------------------------------------------------------------------|-------|
| b2476 | purC | Isolate 1 | non-essential | phosphoribosylaminoimidazole-succinocarboxamide synthetase                  | -2.82 |
| b2476 | purC | Isolate 2 | non-essential | phosphoribosylaminoimidazole-succinocarboxamide synthetase                  | -1.99 |
| b2477 | nlpB | Isolate 1 | non-essential | lipoprotein                                                                 | -0.54 |
| b2477 | nlpB | Isolate 2 | non-essential | lipoprotein                                                                 | -1.36 |
| b2479 | gcvR | Isolate 1 | non-essential | DNA-binding transcriptional repressor, regulatory protein accessory to GcvA | -0.39 |
| b2479 | gcvR | Isolate 2 | non-essential | DNA-binding transcriptional repressor, regulatory protein accessory to GcvA | -0.49 |
| b2480 | bcp  | Isolate 1 | non-essential | thiol peroxidase, thioredoxin-dependent                                     | -0.46 |
| b2480 | bcp  | Isolate 2 | non-essential | thiol peroxidase, thioredoxin-dependent                                     | -0.51 |
| b2481 | hyfA | Isolate 1 | non-essential | hydrogenase 4, 4Fe-4S subunit                                               | 1.03  |
| b2481 | hyfA | Isolate 2 | non-essential | hydrogenase 4, 4Fe-4S subunit                                               | 0.62  |
| b2482 | hyfB | Isolate 1 | non-essential | hydrogenase 4, membrane subunit                                             | 0.82  |
| b2482 | hyfB | Isolate 2 | non-essential | hydrogenase 4, membrane subunit                                             | 0.37  |
| b2483 | hyfC | Isolate 1 | non-essential | hydrogenase 4, membrane subunit                                             | 0.49  |
| b2483 | hyfC | Isolate 2 | non-essential | hydrogenase 4, membrane subunit                                             | 1.20  |
| b2484 | hyfD | Isolate 1 | non-essential | hydrogenase 4, membrane subunit                                             | -2.03 |
| b2484 | hyfD | Isolate 2 | non-essential | hydrogenase 4, membrane subunit                                             | -1.07 |
| b2485 | hyfE | Isolate 1 | non-essential | hydrogenase 4, membrane subunit                                             | 0.37  |
| b2485 | hyfE | Isolate 2 | non-essential | hydrogenase 4, membrane subunit                                             | -1.56 |
| b2486 | hyfF | Isolate 1 | non-essential | hydrogenase 4, membrane subunit                                             | -0.52 |
| b2486 | hyfF | Isolate 2 | non-essential | hydrogenase 4, membrane subunit                                             | 0.62  |
| b2487 | hyfG | Isolate 1 | non-essential | hydrogenase 4, subunit                                                      | 1.07  |
| b2487 | hyfG | Isolate 2 | non-essential | hydrogenase 4, subunit                                                      | 0.88  |
| b2488 | hyfH | Isolate 1 | non-essential | hydrogenase 4, Fe-S subunit                                                 | 2.02  |
| b2488 | hyfH | Isolate 2 | non-essential | hydrogenase 4, Fe-S subunit                                                 | 0.08  |
| b2489 | hyfI | Isolate 1 | non-essential | hydrogenase 4, Fe-S subunit                                                 | 1.89  |
| b2489 | hyfI | Isolate 2 | non-essential | hydrogenase 4, Fe-S subunit                                                 | -0.32 |
| b2490 | hyfJ | Isolate 1 | non-essential | predicted processing element hydrogenase 4                                  | 1.07  |
| b2490 | hyfJ | Isolate 2 | non-essential | predicted processing element hydrogenase 4                                  | -0.97 |
| b2491 | hyfR | Isolate 1 | non-essential | DNA-binding transcriptional activator, formate sensing                      | 1.07  |
| b2491 | hyfR | Isolate 2 | non-essential | DNA-binding transcriptional activator, formate sensing                      | -2.32 |
| b2492 | focB | Isolate 1 | non-essential | predicted formate transporter                                               | 0.03  |
| b2492 | focB | Isolate 2 | non-essential | predicted formate transporter                                               | 1.89  |
| b2493 | yfgO | Isolate 1 | non-essential | predicted inner membrane protein                                            | -1.57 |
| b2493 | yfgO | Isolate 2 | non-essential | predicted inner membrane protein                                            | -2.90 |
| b2494 | yfgC | Isolate 1 | non-essential | predicted peptidase                                                         | 0.71  |
| b2494 | yfgC | Isolate 2 | non-essential | predicted peptidase                                                         | 0.43  |
| b2495 | yfgD | Isolate 1 | non-essential | predicted oxidoreductase                                                    | 1.94  |
| b2495 | yfgD | Isolate 2 | non-essential | predicted oxidoreductase                                                    | -0.32 |
| b2496 | hda  | Isolate 1 | non-essential | ATPase regulatory factor involved in DnaA inactivation                      | -0.52 |
| b2496 | hda  | Isolate 2 | non-essential | ATPase regulatory factor involved in DnaA inactivation                      | 3.63  |
| b2497 | uraA | Isolate 1 | non-essential | uracil transporter                                                          | 0.68  |
| b2497 | uraA | Isolate 2 | non-essential | uracil transporter                                                          | 1.29  |
| b2498 | upp  | Isolate 1 | non-essential | uracil phosphoribosyltransferase                                            | 2.94  |

|       |      |           |               |                                                                                                      |       |
|-------|------|-----------|---------------|------------------------------------------------------------------------------------------------------|-------|
| b2498 | upp  | Isolate 2 | non-essential | uracil phosphoribosyltransferase                                                                     | 0.21  |
| b2499 | purM | Isolate 1 | non-essential | phosphoribosylaminoimidazole synthetase                                                              | -4.14 |
| b2499 | purM | Isolate 2 | non-essential | phosphoribosylaminoimidazole synthetase                                                              | 0.47  |
| b2500 | purN | Isolate 1 | non-essential | phosphoribosylglycinamide formyltransferase 1                                                        | -0.38 |
| b2500 | purN | Isolate 2 | non-essential | phosphoribosylglycinamide formyltransferase 1                                                        | 1.05  |
| b2501 | ppk  | Isolate 1 | non-essential | polyphosphate kinase, component of RNA degradosome                                                   | 0.72  |
| b2501 | ppk  | Isolate 2 | non-essential | polyphosphate kinase, component of RNA degradosome                                                   | -1.83 |
| b2502 | ppx  | Isolate 1 | non-essential | exopolyphosphatase                                                                                   | 1.15  |
| b2502 | ppx  | Isolate 2 | non-essential | exopolyphosphatase                                                                                   | 0.17  |
| b2503 | yfgF | Isolate 1 | non-essential | predicted inner membrane protein                                                                     | 1.60  |
| b2503 | yfgF | Isolate 2 | non-essential | predicted inner membrane protein                                                                     | 3.43  |
| b2504 | yfgG | Isolate 1 | non-essential | predicted protein                                                                                    | 3.44  |
| b2504 | yfgG | Isolate 2 | non-essential | predicted protein                                                                                    | 1.64  |
| b2505 | yfgH | Isolate 1 | non-essential | predicted outer membrane lipoprotein                                                                 | -0.61 |
| b2505 | yfgH | Isolate 2 | non-essential | predicted outer membrane lipoprotein                                                                 | -0.15 |
| b2506 | yfgI | Isolate 1 | non-essential | conserved protein                                                                                    | 1.34  |
| b2506 | yfgI | Isolate 2 | non-essential | conserved protein                                                                                    | 0.42  |
| b2507 | guaA | Isolate 1 | non-essential | GMP synthetase (glutamine aminotransferase)                                                          | -2.64 |
| b2507 | guaA | Isolate 2 | non-essential | GMP synthetase (glutamine aminotransferase)                                                          | -1.94 |
| b2508 | guaB | Isolate 1 | non-essential | IMP dehydrogenase                                                                                    | -5.13 |
| b2508 | guaB | Isolate 2 | non-essential | IMP dehydrogenase                                                                                    | -5.48 |
| b2509 | xseA | Isolate 1 | non-essential | exonuclease VII, large subunit                                                                       | 2.96  |
| b2509 | xseA | Isolate 2 | non-essential | exonuclease VII, large subunit                                                                       | 0.92  |
| b2510 | yfgJ | Isolate 1 | non-essential | predicted protein                                                                                    | 0.35  |
| b2510 | yfgJ | Isolate 2 | non-essential | predicted protein                                                                                    | -0.43 |
| b2511 | der  | Isolate 1 | essential     | predicted GTP-binding protein                                                                        | 1.08  |
| b2512 | yfgL | Isolate 1 | non-essential | protein assembly complex, lipoprotein component                                                      | 3.56  |
| b2512 | yfgL | Isolate 2 | non-essential | protein assembly complex, lipoprotein component                                                      | -0.45 |
| b2513 | yfgM | Isolate 1 | non-essential | conserved protein                                                                                    | 0.44  |
| b2513 | yfgM | Isolate 2 | non-essential | conserved protein                                                                                    | -1.07 |
| b2514 | hisS | Isolate 1 | essential     | histidyl tRNA synthetase                                                                             | 3.24  |
| b2515 | ispG | Isolate 1 | essential     | 1-hydroxy-2-methyl-2-(E)-butenyl 4-diphosphate synthase                                              | 0.95  |
| b2516 | yfgA | Isolate 1 | non-essential | conserved protein                                                                                    | 0.39  |
| b2516 | yfgA | Isolate 2 | non-essential | conserved protein                                                                                    | 1.35  |
| b2517 | yfgB | Isolate 1 | non-essential | predicted enzyme                                                                                     | 0.64  |
| b2517 | yfgB | Isolate 2 | non-essential | predicted enzyme                                                                                     | 0.81  |
| b2518 | ndk  | Isolate 1 | non-essential | multifunctional nucleoside diphosphate kinase -!- apyrimidinic endonuclease -!- 3'-phosphodiesterase | -0.58 |
| b2518 | ndk  | Isolate 2 | non-essential | multifunctional nucleoside diphosphate kinase -!- apyrimidinic endonuclease -!- 3'-phosphodiesterase | -1.35 |
| b2519 | pbpC | Isolate 1 | non-essential | fused transglycosylase -!- transpeptidase                                                            | 0.72  |
| b2519 | pbpC | Isolate 2 | non-essential | fused transglycosylase -!- transpeptidase                                                            | 1.66  |
| b2520 | yfhM | Isolate 1 | non-essential | conserved protein                                                                                    | -0.39 |
| b2520 | yfhM | Isolate 2 | non-essential | conserved protein                                                                                    | -0.08 |
| b2521 | sseA | Isolate 1 | non-essential | 3-mercaptopyruvate sulfurtransferase                                                                 | 0.29  |

|       |      |           |               |                                                              |       |
|-------|------|-----------|---------------|--------------------------------------------------------------|-------|
| b2521 | sseA | Isolate 2 | non-essential | 3-mercaptopyruvate sulfurtransferase                         | 0.52  |
| b2522 | sseB | Isolate 1 | non-essential | rhodanase-like enzyme, sulfur transfer from thiosulfate      | -0.43 |
| b2522 | sseB | Isolate 2 | non-essential | rhodanase-like enzyme, sulfur transfer from thiosulfate      | -1.75 |
| b2523 | pepB | Isolate 1 | non-essential | aminopeptidase B                                             | 0.28  |
| b2523 | pepB | Isolate 2 | non-essential | aminopeptidase B                                             | -1.45 |
| b2524 | yfhJ | Isolate 1 | non-essential | conserved protein                                            | -0.62 |
| b2524 | yfhJ | Isolate 2 | non-essential | conserved protein                                            | -2.97 |
| b2525 | fdx  | Isolate 1 | non-essential | [2Fe-2S] ferredoxin                                          | 0.63  |
| b2525 | fdx  | Isolate 2 | non-essential | [2Fe-2S] ferredoxin                                          | 1.18  |
| b2526 | hscA | Isolate 1 | non-essential | DnaK-like molecular chaperone specific for IscU              | -0.13 |
| b2526 | hscA | Isolate 2 | non-essential | DnaK-like molecular chaperone specific for IscU              | 2.48  |
| b2527 | hscB | Isolate 1 | non-essential | DnaJ-like molecular chaperone specific for IscU              | 0.69  |
| b2527 | hscB | Isolate 2 | non-essential | DnaJ-like molecular chaperone specific for IscU              | 1.52  |
| b2528 | iscA | Isolate 1 | non-essential | FeS cluster assembly protein                                 | 1.26  |
| b2528 | iscA | Isolate 2 | non-essential | FeS cluster assembly protein                                 | -1.71 |
| b2529 | iscU | Isolate 1 | non-essential | scaffold protein                                             | 0.72  |
| b2529 | iscU | Isolate 2 | non-essential | scaffold protein                                             | 0.18  |
| b2530 | iscS | Isolate 1 | non-essential | cysteine desulfurase (tRNA sulfurtransferase), PLP-dependent | -0.66 |
| b2530 | iscS | Isolate 2 | non-essential | cysteine desulfurase (tRNA sulfurtransferase), PLP-dependent | 1.96  |
| b2531 | iscR | Isolate 1 | non-essential | DNA-binding transcriptional activator                        | -0.44 |
| b2531 | iscR | Isolate 2 | non-essential | DNA-binding transcriptional activator                        | -0.05 |
| b2532 | yfhQ | Isolate 1 | non-essential | predicted methyltransferase                                  | 0.71  |
| b2532 | yfhQ | Isolate 2 | non-essential | predicted methyltransferase                                  | 2.16  |
| b2534 | yfhR | Isolate 1 | non-essential | predicted peptidase                                          | -0.44 |
| b2534 | yfhR | Isolate 2 | non-essential | predicted peptidase                                          | 2.97  |
| b2535 | csiE | Isolate 1 | non-essential | stationary phase inducible protein                           | 0.66  |
| b2535 | csiE | Isolate 2 | non-essential | stationary phase inducible protein                           | -0.31 |
| b2536 | hcaT | Isolate 1 | non-essential | predicted 3-phenylpropionic transporter                      | -0.03 |
| b2536 | hcaT | Isolate 2 | non-essential | predicted 3-phenylpropionic transporter                      | 0.13  |
| b2537 | hcaR | Isolate 1 | non-essential | DNA-binding transcriptional regulator                        | 1.38  |
| b2537 | hcaR | Isolate 2 | non-essential | DNA-binding transcriptional regulator                        | 1.54  |
| b2538 | hcaE | Isolate 1 | non-essential | 3-phenylpropionate dioxygenase, large (alpha) subunit        | 0.15  |
| b2538 | hcaE | Isolate 2 | non-essential | 3-phenylpropionate dioxygenase, large (alpha) subunit        | -0.95 |
| b2539 | hcaF | Isolate 1 | non-essential | 3-phenylpropionate dioxygenase, small (beta) subunit         | 2.28  |
| b2539 | hcaF | Isolate 2 | non-essential | 3-phenylpropionate dioxygenase, small (beta) subunit         | 1.92  |
| b2540 | hcaC | Isolate 1 | non-essential | 3-phenylpropionate dioxygenase, predicted ferredoxin subunit | -1.65 |
| b2540 | hcaC | Isolate 2 | non-essential | 3-phenylpropionate dioxygenase, predicted ferredoxin subunit | -0.50 |
| b2541 | hcaB | Isolate 1 | non-essential | 2,3-dihydroxy-2,3-dihydrophenylpropionate dehydrogenase      | -1.55 |
| b2541 | hcaB | Isolate 2 | non-essential | 2,3-dihydroxy-2,3-dihydrophenylpropionate dehydrogenase      | -0.41 |
| b2542 | hcaD | Isolate 1 | non-essential | phenylpropionate dioxygenase, ferredoxin reductase subunit   | -2.81 |
| b2542 | hcaD | Isolate 2 | non-essential | phenylpropionate dioxygenase, ferredoxin reductase subunit   | -0.62 |
| b2543 | yphA | Isolate 1 | non-essential | predicted inner membrane protein                             | -0.05 |
| b2543 | yphA | Isolate 2 | non-essential | predicted inner membrane protein                             | 0.73  |

|       |      |           |               |                                                                                          |        |
|-------|------|-----------|---------------|------------------------------------------------------------------------------------------|--------|
| b2544 | yphB | Isolate 1 | non-essential | conserved protein                                                                        | -0.48  |
| b2544 | yphB | Isolate 2 | non-essential | conserved protein                                                                        | -10.36 |
| b2545 | yphC | Isolate 1 | non-essential | predicted oxidoreductase, Zn-dependent and NAD(P)-binding                                | 0.37   |
| b2545 | yphC | Isolate 2 | non-essential | predicted oxidoreductase, Zn-dependent and NAD(P)-binding                                | -0.01  |
| b2546 | yphD | Isolate 1 | non-essential | predicted sugar transporter subunit -!- membrane component of ABC superfamily            | -0.43  |
| b2546 | yphD | Isolate 2 | non-essential | predicted sugar transporter subunit -!- membrane component of ABC superfamily            | 1.90   |
| b2547 | yphE | Isolate 1 | non-essential | fused predicted sugar transporter subunits -!- ATP-binding components of ABC superfamily | -1.61  |
| b2547 | yphE | Isolate 2 | non-essential | fused predicted sugar transporter subunits -!- ATP-binding components of ABC superfamily | 1.40   |
| b2548 | yphF | Isolate 1 | non-essential | predicted sugar transporter subunit -!- periplasmic-binding component of ABC superfamily | -1.57  |
| b2548 | yphF | Isolate 2 | non-essential | predicted sugar transporter subunit -!- periplasmic-binding component of ABC superfamily | -1.67  |
| b2549 | yphG | Isolate 1 | non-essential | conserved protein                                                                        | -1.91  |
| b2549 | yphG | Isolate 2 | non-essential | conserved protein                                                                        | -0.57  |
| b2550 | yphH | Isolate 1 | non-essential | predicted DNA-binding transcriptional regulator                                          | 0.81   |
| b2550 | yphH | Isolate 2 | non-essential | predicted DNA-binding transcriptional regulator                                          | -1.20  |
| b2551 | glyA | Isolate 1 | non-essential | serine hydroxymethyltransferase                                                          | 1.59   |
| b2551 | glyA | Isolate 2 | non-essential | serine hydroxymethyltransferase                                                          | 1.18   |
| b2552 | hmp  | Isolate 1 | non-essential | fused nitric oxide dioxygenase -!- dihydropteridine reductase 2                          | 0.31   |
| b2552 | hmp  | Isolate 2 | non-essential | fused nitric oxide dioxygenase -!- dihydropteridine reductase 2                          | -0.50  |
| b2553 | glnB | Isolate 1 | non-essential | regulatory protein P-II for glutamine synthetase                                         | 2.53   |
| b2553 | glnB | Isolate 2 | non-essential | regulatory protein P-II for glutamine synthetase                                         | 4.28   |
| b2554 | yfhA | Isolate 1 | non-essential | predicted DNA-binding response regulator in two-component system                         | 0.52   |
| b2554 | yfhA | Isolate 2 | non-essential | predicted DNA-binding response regulator in two-component system                         | 0.77   |
| b2555 | yfhG | Isolate 1 | non-essential | conserved protein                                                                        | -0.69  |
| b2555 | yfhG | Isolate 2 | non-essential | conserved protein                                                                        | 0.00   |
| b2556 | yfhK | Isolate 1 | non-essential | predicted sensory kinase in two-component system                                         | -2.97  |
| b2556 | yfhK | Isolate 2 | non-essential | predicted sensory kinase in two-component system                                         | -0.11  |
| b2557 | purL | Isolate 1 | non-essential | phosphoribosylformyl-glycineamide synthetase                                             | -0.72  |
| b2557 | purL | Isolate 2 | non-essential | phosphoribosylformyl-glycineamide synthetase                                             | -2.17  |
| b2558 | yfhD | Isolate 1 | non-essential | predicted transglycosylase                                                               | -0.54  |
| b2558 | yfhD | Isolate 2 | non-essential | predicted transglycosylase                                                               | -0.89  |
| b2559 | tadA | Isolate 1 | essential     | tRNA-specific adenosine deaminase                                                        | 3.72   |
| b2560 | yfhB | Isolate 1 | non-essential | conserved protein                                                                        | 0.32   |
| b2560 | yfhB | Isolate 2 | non-essential | conserved protein                                                                        | -0.52  |
| b2561 | yfhH | Isolate 1 | non-essential | predicted DNA-binding transcriptional regulator                                          | -2.09  |
| b2561 | yfhH | Isolate 2 | non-essential | predicted DNA-binding transcriptional regulator                                          | 0.45   |
| b2562 | yfhL | Isolate 1 | non-essential | predicted 4Fe-4S cluster-containing protein                                              | 0.72   |
| b2562 | yfhL | Isolate 2 | non-essential | predicted 4Fe-4S cluster-containing protein                                              | 0.52   |
| b2563 | acpS | Isolate 1 | essential     | holo-[acyl-carrier-protein] synthase 1                                                   | 0.61   |
| b2564 | pdxJ | Isolate 1 | non-essential | pyridoxine 5'-phosphate synthase                                                         | -1.58  |
| b2564 | pdxJ | Isolate 2 | non-essential | pyridoxine 5'-phosphate synthase                                                         | -0.87  |
| b2565 | recO | Isolate 1 | non-essential | gap repair protein                                                                       | -0.89  |
| b2565 | recO | Isolate 2 | non-essential | gap repair protein                                                                       | -0.52  |
| b2566 | era  | Isolate 1 | essential     | membrane-associated, 16S rRNA-binding GTPase                                             | -1.73  |

|       |      |           |               |                                                                                    |       |
|-------|------|-----------|---------------|------------------------------------------------------------------------------------|-------|
| b2567 | rnc  | Isolate 1 | essential     | RNase III                                                                          | -2.85 |
| b2569 | lepA | Isolate 1 | non-essential | GTP binding membrane protein                                                       | -0.62 |
| b2569 | lepA | Isolate 2 | non-essential | GTP binding membrane protein                                                       | 0.10  |
| b2570 | rseC | Isolate 1 | non-essential | RseC protein involved in reduction of the SoxR iron-sulfur cluster                 | 0.57  |
| b2570 | rseC | Isolate 2 | non-essential | RseC protein involved in reduction of the SoxR iron-sulfur cluster                 | 0.45  |
| b2571 | rseB | Isolate 1 | non-essential | anti-sigma factor                                                                  | 1.34  |
| b2571 | rseB | Isolate 2 | non-essential | anti-sigma factor                                                                  | -0.25 |
| b2572 | rseA | Isolate 1 | non-essential | anti-sigma factor                                                                  | -0.82 |
| b2572 | rseA | Isolate 2 | non-essential | anti-sigma factor                                                                  | 1.73  |
| b2574 | nadB | Isolate 1 | non-essential | quinolinate synthase, L-aspartate oxidase (B protein) subunit                      | -0.12 |
| b2574 | nadB | Isolate 2 | non-essential | quinolinate synthase, L-aspartate oxidase (B protein) subunit                      | 0.50  |
| b2575 | yfiC | Isolate 1 | non-essential | predicted methyltransferase                                                        | -0.18 |
| b2575 | yfiC | Isolate 2 | non-essential | predicted methyltransferase                                                        | -0.16 |
| b2576 | srmB | Isolate 1 | non-essential | ATP-dependent RNA helicase                                                         | 0.14  |
| b2576 | srmB | Isolate 2 | non-essential | ATP-dependent RNA helicase                                                         | -0.62 |
| b2577 | yfiE | Isolate 1 | non-essential | predicted DNA-binding transcriptional regulator                                    | 1.04  |
| b2577 | yfiE | Isolate 2 | non-essential | predicted DNA-binding transcriptional regulator                                    | -1.47 |
| b2578 | yfiK | Isolate 1 | non-essential | neutral amino-acid efflux system                                                   | 0.73  |
| b2578 | yfiK | Isolate 2 | non-essential | neutral amino-acid efflux system                                                   | 0.19  |
| b2579 | yfiD | Isolate 1 | non-essential | pyruvate formate lyase subunit                                                     | -0.16 |
| b2579 | yfiD | Isolate 2 | non-essential | pyruvate formate lyase subunit                                                     | 0.10  |
| b2580 | ung  | Isolate 1 | non-essential | uracil-DNA-glycosylase                                                             | -1.01 |
| b2580 | ung  | Isolate 2 | non-essential | uracil-DNA-glycosylase                                                             | -0.71 |
| b2581 | yfiF | Isolate 1 | non-essential | predicted methyltransferase                                                        | 2.84  |
| b2581 | yfiF | Isolate 2 | non-essential | predicted methyltransferase                                                        | -0.53 |
| b2582 | trxC | Isolate 1 | non-essential | thioredoxin 2                                                                      | 1.08  |
| b2582 | trxC | Isolate 2 | non-essential | thioredoxin 2                                                                      | -1.59 |
| b2583 | yfiP | Isolate 1 | non-essential | conserved protein                                                                  | -1.19 |
| b2583 | yfiP | Isolate 2 | non-essential | conserved protein                                                                  | -0.13 |
| b2584 | yfiQ | Isolate 1 | non-essential | fused predicted acyl-CoA synthetase NAD(P)-binding subunit -!- ATP-binding subunit | -0.88 |
| b2584 | yfiQ | Isolate 2 | non-essential | fused predicted acyl-CoA synthetase NAD(P)-binding subunit -!- ATP-binding subunit | -0.64 |
| b2586 | yfiM | Isolate 1 | non-essential | predicted protein                                                                  | -0.26 |
| b2586 | yfiM | Isolate 2 | non-essential | predicted protein                                                                  | -1.22 |
| b2587 | kgtP | Isolate 1 | non-essential | alpha-ketoglutarate transporter                                                    | 0.29  |
| b2587 | kgtP | Isolate 2 | non-essential | alpha-ketoglutarate transporter                                                    | -0.59 |
| b2592 | clpB | Isolate 1 | non-essential | protein disaggregation chaperone                                                   | -1.06 |
| b2592 | clpB | Isolate 2 | non-essential | protein disaggregation chaperone                                                   | -0.60 |
| b2593 | yfiH | Isolate 1 | non-essential | conserved protein                                                                  | -0.54 |
| b2593 | yfiH | Isolate 2 | non-essential | conserved protein                                                                  | 0.06  |
| b2594 | rluD | Isolate 1 | non-essential | 23S rRNA pseudouridine synthase                                                    | -2.10 |
| b2594 | rluD | Isolate 2 | non-essential | 23S rRNA pseudouridine synthase                                                    | -3.46 |
| b2597 | yfiA | Isolate 1 | non-essential | cold shock protein associated with 30S ribosomal subunit                           | -1.67 |
| b2597 | yfiA | Isolate 2 | non-essential | cold shock protein associated with 30S ribosomal subunit                           | 0.28  |

|       |      |           |               |                                                                           |       |
|-------|------|-----------|---------------|---------------------------------------------------------------------------|-------|
| b2598 | pheL | Isolate 1 | non-essential | pheA gene leader peptide                                                  | 1.22  |
| b2598 | pheL | Isolate 2 | non-essential | pheA gene leader peptide                                                  | 0.33  |
| b2599 | pheA | Isolate 1 | non-essential | fused chorismate mutase P -!- prephenate dehydratase                      | 0.85  |
| b2599 | pheA | Isolate 2 | non-essential | fused chorismate mutase P -!- prephenate dehydratase                      | 3.57  |
| b2600 | tyrA | Isolate 1 | non-essential | fused chorismate mutase T -!- prephenate dehydrogenase                    | 3.95  |
| b2600 | tyrA | Isolate 2 | non-essential | fused chorismate mutase T -!- prephenate dehydrogenase                    | 2.39  |
| b2601 | aroF | Isolate 1 | non-essential | 3-deoxy-D-arabinoheptulosonate-7-phosphate synthase, tyrosine-repressible | 1.44  |
| b2601 | aroF | Isolate 2 | non-essential | 3-deoxy-D-arabinoheptulosonate-7-phosphate synthase, tyrosine-repressible | 0.99  |
| b2602 | yfiL | Isolate 1 | non-essential | predicted protein                                                         | -0.32 |
| b2602 | yfiL | Isolate 2 | non-essential | predicted protein                                                         | -0.56 |
| b2603 | yfiR | Isolate 1 | non-essential | predicted protein                                                         | -2.97 |
| b2603 | yfiR | Isolate 2 | non-essential | predicted protein                                                         | -1.39 |
| b2604 | yfiN | Isolate 1 | non-essential | predicted diguanylate cyclase                                             | -0.60 |
| b2604 | yfiN | Isolate 2 | non-essential | predicted diguanylate cyclase                                             | -0.45 |
| b2605 | yfiB | Isolate 1 | non-essential | predicted outer membrane lipoprotein                                      | 1.91  |
| b2605 | yfiB | Isolate 2 | non-essential | predicted outer membrane lipoprotein                                      | 0.11  |
| b2607 | trmD | Isolate 1 | essential     | tRNA (guanine-1-)-methyltransferase                                       | 3.45  |
| b2608 | rimM | Isolate 1 | non-essential | 16S rRNA processing protein                                               | 0.00  |
| b2608 | rimM | Isolate 2 | non-essential | 16S rRNA processing protein                                               | 1.28  |
| b2610 | ffh  | Isolate 1 | essential     | Signal Recognition Particle (SRP) component with 4.5S RNA (ffs)           | 3.26  |
| b2611 | ypjD | Isolate 1 | non-essential | predicted inner membrane protein                                          | -0.61 |
| b2611 | ypjD | Isolate 2 | non-essential | predicted inner membrane protein                                          | -2.62 |
| b2615 | uppS | Isolate 1 | essential     | NAD kinase                                                                | -1.24 |
| b2616 | recN | Isolate 1 | non-essential | recombination and repair protein                                          | -2.35 |
| b2616 | recN | Isolate 2 | non-essential | recombination and repair protein                                          | -2.20 |
| b2617 | smpA | Isolate 1 | non-essential | small membrane lipoprotein                                                | 0.55  |
| b2617 | smpA | Isolate 2 | non-essential | small membrane lipoprotein                                                | -0.35 |
| b2618 | yfjF | Isolate 1 | non-essential | predicted protein                                                         | 4.95  |
| b2618 | yfjF | Isolate 2 | non-essential | predicted protein                                                         | -1.96 |
| b2619 | yfjG | Isolate 1 | non-essential | conserved protein                                                         | -2.50 |
| b2619 | yfjG | Isolate 2 | non-essential | conserved protein                                                         | 0.25  |
| b2620 | smpB | Isolate 1 | non-essential | trans-translation protein                                                 | -0.06 |
| b2620 | smpB | Isolate 2 | non-essential | trans-translation protein                                                 | 0.23  |
| b2622 | intA | Isolate 1 | non-essential | CP4-57 prophage; integrase                                                | 1.00  |
| b2622 | intA | Isolate 2 | non-essential | CP4-57 prophage; integrase                                                | -0.24 |
| b2623 | yfjH | Isolate 1 | non-essential | CP4-57 prophage; predicted protein                                        | -0.76 |
| b2623 | yfjH | Isolate 2 | non-essential | CP4-57 prophage; predicted protein                                        | 0.64  |
| b2624 | alpA | Isolate 1 | non-essential | CP4-57 prophage; DNA-binding transcriptional activator                    | 2.32  |
| b2624 | alpA | Isolate 2 | non-essential | CP4-57 prophage; DNA-binding transcriptional activator                    | 1.18  |
| b2625 | yfjI | Isolate 1 | non-essential | CP4-57 prophage; predicted protein                                        | -2.43 |
| b2625 | yfjI | Isolate 2 | non-essential | CP4-57 prophage; predicted protein                                        | -2.30 |
| b2626 | yfjJ | Isolate 1 | non-essential | CP4-57 prophage; predicted protein                                        | -1.68 |
| b2626 | yfjJ | Isolate 2 | non-essential | CP4-57 prophage; predicted protein                                        | -0.40 |

|       |      |           |               |                                                                    |       |
|-------|------|-----------|---------------|--------------------------------------------------------------------|-------|
| b2627 | yfjK | Isolate 1 | non-essential | CP4-57 prophage; conserved protein                                 | 0.96  |
| b2627 | yfjK | Isolate 2 | non-essential | CP4-57 prophage; conserved protein                                 | 0.37  |
| b2628 | yfjL | Isolate 1 | non-essential | CP4-57 prophage; predicted protein                                 | -1.33 |
| b2628 | yfjL | Isolate 2 | non-essential | CP4-57 prophage; predicted protein                                 | -0.09 |
| b2629 | yfjM | Isolate 1 | non-essential | CP4-57 prophage; predicted protein                                 | -0.03 |
| b2629 | yfjM | Isolate 2 | non-essential | CP4-57 prophage; predicted protein                                 | -0.92 |
| b2630 | yfjN | Isolate 1 | non-essential | CP4-57 prophage; predicted protein                                 | -2.48 |
| b2630 | yfjN | Isolate 2 | non-essential | CP4-57 prophage; predicted protein                                 | 1.33  |
| b2631 | yfjO | Isolate 1 | non-essential | CP4-57 prophage; predicted protein                                 | -2.80 |
| b2631 | yfjO | Isolate 2 | non-essential | CP4-57 prophage; predicted protein                                 | -1.06 |
| b2632 | yfjP | Isolate 1 | non-essential | CP4-57 prophage; predicted GTP-binding protein                     | -0.63 |
| b2632 | yfjP | Isolate 2 | non-essential | CP4-57 prophage; predicted GTP-binding protein                     | -0.26 |
| b2633 | yfjQ | Isolate 1 | non-essential | CP4-57 prophage; predicted protein                                 | 0.11  |
| b2633 | yfjQ | Isolate 2 | non-essential | CP4-57 prophage; predicted protein                                 | -3.22 |
| b2634 | yfjR | Isolate 1 | non-essential | CP4-57 prophage; predicted DNA-binding transcriptional regulator   | -0.10 |
| b2634 | yfjR | Isolate 2 | non-essential | CP4-57 prophage; predicted DNA-binding transcriptional regulator   | 0.21  |
| b2635 | ypjK | Isolate 1 | unknown       | CP4-57 prophage; predicted inner membrane protein                  | -0.29 |
| b2635 | ypjK | Isolate 2 | unknown       | CP4-57 prophage; predicted inner membrane protein                  | 0.38  |
| b2636 | yfjS | Isolate 1 | non-essential | CP4-57 prophage; predicted protein                                 | -1.39 |
| b2636 | yfjS | Isolate 2 | non-essential | CP4-57 prophage; predicted protein                                 | -0.91 |
| b2637 | yfjT | Isolate 1 | non-essential | CP4-57 prophage; predicted protein                                 | -1.94 |
| b2637 | yfjT | Isolate 2 | non-essential | CP4-57 prophage; predicted protein                                 | 0.07  |
| b2638 | yfjU | Isolate 1 | non-essential | CP4-57 prophage; conserved protein                                 | -1.53 |
| b2638 | yfjU | Isolate 2 | non-essential | CP4-57 prophage; conserved protein                                 | -1.00 |
| b2640 | yfjV | Isolate 1 | non-essential | CP4-57 prophage; predicted protein                                 | -0.11 |
| b2640 | yfjV | Isolate 2 | non-essential | CP4-57 prophage; predicted protein                                 | -0.51 |
| b2641 | ypjM | Isolate 1 | *             | CP4-57 prophage; predicted protein (pseudogene)                    | -0.75 |
| b2641 | ypjM | Isolate 2 | *             | CP4-57 prophage; predicted protein (pseudogene)                    | -0.61 |
| b2642 | yfjW | Isolate 1 | non-essential | CP4-57 prophage; predicted inner membrane protein                  | -1.36 |
| b2642 | yfjW | Isolate 2 | non-essential | CP4-57 prophage; predicted inner membrane protein                  | -1.98 |
| b2643 | yfjX | Isolate 1 | non-essential | CP4-57 prophage; predicted antirestriction protein                 | 1.72  |
| b2643 | yfjX | Isolate 2 | non-essential | CP4-57 prophage; predicted antirestriction protein                 | -0.19 |
| b2644 | yfjY | Isolate 1 | non-essential | CP4-57 prophage; predicted DNA repair protein                      | -0.95 |
| b2644 | yfjY | Isolate 2 | non-essential | CP4-57 prophage; predicted DNA repair protein                      | -1.21 |
| b2645 | yfjZ | Isolate 1 | non-essential | CP4-57 prophage; antitoxin of the YpjF-YfjZ toxin-antitoxin system | -0.55 |
| b2645 | yfjZ | Isolate 2 | non-essential | CP4-57 prophage; antitoxin of the YpjF-YfjZ toxin-antitoxin system | -1.84 |
| b2646 | ypjF | Isolate 1 | non-essential | CP4-57 prophage; toxin of the YpjF-YfjZ toxin-antitoxin system     | -1.72 |
| b2646 | ypjF | Isolate 2 | non-essential | CP4-57 prophage; toxin of the YpjF-YfjZ toxin-antitoxin system     | -2.16 |
| b2647 | ypjA | Isolate 1 | non-essential | adhesin-like autotransporter                                       | -0.87 |
| b2647 | ypjA | Isolate 2 | non-essential | adhesin-like autotransporter                                       | -1.48 |
| b2648 | pinH | Isolate 1 | *             | predicted invertase fragment (pseudogene)                          | -3.01 |
| b2648 | pinH | Isolate 2 | *             | predicted invertase fragment (pseudogene)                          | -2.98 |
| b2649 | ypjB | Isolate 1 | non-essential | predicted protein                                                  | -1.31 |

|       |      |           |               |                                                          |       |
|-------|------|-----------|---------------|----------------------------------------------------------|-------|
| b2649 | ypjB | Isolate 2 | non-essential | predicted protein                                        | 0.36  |
| b2650 | ypjC | Isolate 1 | non-essential | predicted protein                                        | 0.00  |
| b2650 | ypjC | Isolate 2 | non-essential | predicted protein                                        | -1.16 |
| b2654 | ygaQ | Isolate 1 | non-essential | predicted protein                                        | 1.57  |
| b2654 | ygaQ | Isolate 2 | non-essential | predicted protein                                        | -2.26 |
| b2657 | yqaC | Isolate 1 | *             | conserved protein (pseudogene)                           | -0.62 |
| b2657 | yqaC | Isolate 2 | *             | conserved protein (pseudogene)                           | 0.16  |
| b2658 | yqaD | Isolate 1 | non-essential | conserved protein                                        | -1.34 |
| b2658 | yqaD | Isolate 2 | non-essential | conserved protein                                        | -2.42 |
| b2659 | ygaT | Isolate 1 | non-essential | predicted protein                                        | 0.48  |
| b2659 | ygaT | Isolate 2 | non-essential | predicted protein                                        | -0.74 |
| b2660 | ygaF | Isolate 1 | non-essential | predicted enzyme                                         | -0.07 |
| b2660 | ygaF | Isolate 2 | non-essential | predicted enzyme                                         | 0.25  |
| b2661 | gabD | Isolate 1 | non-essential | succinate-semialdehyde dehydrogenase I, NADP-dependent   | 0.88  |
| b2661 | gabD | Isolate 2 | non-essential | succinate-semialdehyde dehydrogenase I, NADP-dependent   | -0.22 |
| b2662 | gabT | Isolate 1 | non-essential | 4-aminobutyrate aminotransferase, PLP-dependent          | -0.50 |
| b2662 | gabT | Isolate 2 | non-essential | 4-aminobutyrate aminotransferase, PLP-dependent          | 0.11  |
| b2663 | gabP | Isolate 1 | non-essential | gamma-aminobutyrate transporter                          | -0.66 |
| b2663 | gabP | Isolate 2 | non-essential | gamma-aminobutyrate transporter                          | -0.21 |
| b2664 | csiR | Isolate 1 | non-essential | DNA-binding transcriptional dual regulator               | 1.58  |
| b2664 | csiR | Isolate 2 | non-essential | DNA-binding transcriptional dual regulator               | -0.71 |
| b2665 | ygaU | Isolate 1 | non-essential | predicted protein                                        | -1.05 |
| b2665 | ygaU | Isolate 2 | non-essential | predicted protein                                        | -0.61 |
| b2666 | yqaE | Isolate 1 | non-essential | predicted membrane protein                               | -0.21 |
| b2666 | yqaE | Isolate 2 | non-essential | predicted membrane protein                               | -3.01 |
| b2667 | ygaV | Isolate 1 | non-essential | predicted DNA-binding transcriptional regulator          | 0.21  |
| b2667 | ygaV | Isolate 2 | non-essential | predicted DNA-binding transcriptional regulator          | -0.43 |
| b2668 | ygaP | Isolate 1 | non-essential | predicted inner membrane protein with hydrolase activity | 0.34  |
| b2668 | ygaP | Isolate 2 | non-essential | predicted inner membrane protein with hydrolase activity | -0.36 |
| b2669 | stpA | Isolate 1 | non-essential | DNA binding protein, nucleoid-associated                 | 0.84  |
| b2669 | stpA | Isolate 2 | non-essential | DNA binding protein, nucleoid-associated                 | 1.54  |
| b2670 | ygaW | Isolate 1 | non-essential | predicted inner membrane protein                         | -0.92 |
| b2670 | ygaW | Isolate 2 | non-essential | predicted inner membrane protein                         | 0.09  |
| b2671 | ygaC | Isolate 1 | non-essential | predicted protein                                        | -0.71 |
| b2671 | ygaC | Isolate 2 | non-essential | predicted protein                                        | -1.79 |
| b2672 | ygaM | Isolate 1 | non-essential | predicted protein                                        | -2.12 |
| b2672 | ygaM | Isolate 2 | non-essential | predicted protein                                        | -0.01 |
| b2673 | nrdH | Isolate 1 | non-essential | glutaredoxin-like protein                                | 2.49  |
| b2673 | nrdH | Isolate 2 | non-essential | glutaredoxin-like protein                                | -1.69 |
| b2674 | nrdI | Isolate 1 | non-essential | protein that stimulates ribonucleotide reduction         | -0.65 |
| b2674 | nrdI | Isolate 2 | non-essential | protein that stimulates ribonucleotide reduction         | 0.63  |
| b2675 | nrdE | Isolate 1 | non-essential | ribonucleoside-diphosphate reductase 2, alpha subunit    | -0.49 |
| b2675 | nrdE | Isolate 2 | non-essential | ribonucleoside-diphosphate reductase 2, alpha subunit    | -1.39 |



|       |      |           |               |                                                                                          |       |
|-------|------|-----------|---------------|------------------------------------------------------------------------------------------|-------|
| b2676 | nrdF | Isolate 1 | non-essential | ribonucleoside-diphosphate reductase 2, beta subunit, ferritin-like                      | -0.89 |
| b2676 | nrdF | Isolate 2 | non-essential | ribonucleoside-diphosphate reductase 2, beta subunit, ferritin-like                      | -0.19 |
| b2677 | proV | Isolate 1 | non-essential | glycine betaine transporter subunit -!- ATP-binding compoent of ABC superfamily          | 0.03  |
| b2677 | proV | Isolate 2 | non-essential | glycine betaine transporter subunit -!- ATP-binding compoent of ABC superfamily          | 2.06  |
| b2678 | proW | Isolate 1 | non-essential | glycine betaine transporter subunit -!- membrane component of ABC superfamily            | 6.85  |
| b2678 | proW | Isolate 2 | non-essential | glycine betaine transporter subunit -!- membrane component of ABC superfamily            | -0.50 |
| b2679 | proX | Isolate 1 | non-essential | glycine betaine transporter subunit -!- periplasmic-binding component of ABC superfamily | 0.54  |
| b2679 | proX | Isolate 2 | non-essential | glycine betaine transporter subunit -!- periplasmic-binding component of ABC superfamily | -2.11 |
| b2680 | ygaX | Isolate 1 | non-essential | predicted transporter                                                                    | -0.24 |
| b2680 | ygaX | Isolate 2 | non-essential | predicted transporter                                                                    | -0.19 |
| b2681 | ygaY | Isolate 1 | *             | predicted transporter (pseudogene)                                                       | 1.11  |
| b2681 | ygaY | Isolate 2 | *             | predicted transporter (pseudogene)                                                       | 0.68  |
| b2682 | ygaZ | Isolate 1 | non-essential | predicted transporter                                                                    | -0.52 |
| b2682 | ygaZ | Isolate 2 | non-essential | predicted transporter                                                                    | -0.89 |
| b2683 | ygaH | Isolate 1 | non-essential | predicted inner membrane protein                                                         | -0.54 |
| b2683 | ygaH | Isolate 2 | non-essential | predicted inner membrane protein                                                         | -1.92 |
| b2684 | mprA | Isolate 1 | non-essential | DNA-binding transcriptional regulator                                                    | 0.21  |
| b2684 | mprA | Isolate 2 | non-essential | DNA-binding transcriptional regulator                                                    | -1.38 |
| b2685 | emrA | Isolate 1 | non-essential | multidrug efflux system                                                                  | 0.34  |
| b2685 | emrA | Isolate 2 | non-essential | multidrug efflux system                                                                  | 1.38  |
| b2686 | emrB | Isolate 1 | non-essential | multidrug efflux system protein                                                          | 0.04  |
| b2686 | emrB | Isolate 2 | non-essential | multidrug efflux system protein                                                          | 0.46  |
| b2687 | luxS | Isolate 1 | non-essential | S-ribosylhomocysteinase                                                                  | 0.00  |
| b2687 | luxS | Isolate 2 | non-essential | S-ribosylhomocysteinase                                                                  | -0.44 |
| b2688 | gshA | Isolate 1 | non-essential | gamma-glutamate-cysteine ligase                                                          | 0.38  |
| b2688 | gshA | Isolate 2 | non-essential | gamma-glutamate-cysteine ligase                                                          | -2.28 |
| b2689 | yqaA | Isolate 1 | non-essential | conserved inner membrane protein                                                         | 1.10  |
| b2689 | yqaA | Isolate 2 | non-essential | conserved inner membrane protein                                                         | 0.24  |
| b2690 | yqaB | Isolate 1 | non-essential | predicted hydrolase                                                                      | 0.13  |
| b2690 | yqaB | Isolate 2 | non-essential | predicted hydrolase                                                                      | -7.47 |
| b2697 | alaS | Isolate 1 | non-essential | alanyl-tRNA synthetase                                                                   | -3.46 |
| b2697 | alaS | Isolate 2 | non-essential | alanyl-tRNA synthetase                                                                   | -1.66 |
| b2698 | recX | Isolate 1 | non-essential | regulatory protein for RecA                                                              | -0.80 |
| b2698 | recX | Isolate 2 | non-essential | regulatory protein for RecA                                                              | -0.74 |
| b2699 | recA | Isolate 1 | non-essential | DNA strand exchange and recombination protein with protease and nuclease activity        | 0.19  |
| b2699 | recA | Isolate 2 | non-essential | DNA strand exchange and recombination protein with protease and nuclease activity        | 1.92  |
| b2700 | ygaD | Isolate 1 | non-essential | conserved protein                                                                        | -0.89 |
| b2700 | ygaD | Isolate 2 | non-essential | conserved protein                                                                        | -1.68 |
| b2701 | mltB | Isolate 1 | non-essential | membrane-bound lytic murein transglycosylase B                                           | -1.08 |
| b2701 | mltB | Isolate 2 | non-essential | membrane-bound lytic murein transglycosylase B                                           | -2.54 |
| b2702 | srlA | Isolate 1 | non-essential | glucitol/sorbitol-specific enzyme IIC component of PTS                                   | -1.54 |
| b2702 | srlA | Isolate 2 | non-essential | glucitol/sorbitol-specific enzyme IIC component of PTS                                   | -0.49 |
| b2703 | srlE | Isolate 1 | non-essential | glucitol/sorbitol-specific enzyme IIB component of PTS                                   | -0.36 |

|       |      |           |               |                                                                                |       |
|-------|------|-----------|---------------|--------------------------------------------------------------------------------|-------|
| b2703 | srIE | Isolate 2 | non-essential | glucitol/sorbitol-specific enzyme IIB component of PTS                         | 0.00  |
| b2704 | srIB | Isolate 1 | non-essential | glucitol/sorbitol-specific enzyme IIA component of PTS                         | -1.16 |
| b2704 | srIB | Isolate 2 | non-essential | glucitol/sorbitol-specific enzyme IIA component of PTS                         | -0.29 |
| b2705 | srID | Isolate 1 | non-essential | sorbitol-6-phosphate dehydrogenase                                             | -0.50 |
| b2705 | srID | Isolate 2 | non-essential | sorbitol-6-phosphate dehydrogenase                                             | -4.31 |
| b2706 | gutM | Isolate 1 | non-essential | DNA-binding transcriptional activator                                          | 0.02  |
| b2706 | gutM | Isolate 2 | non-essential | DNA-binding transcriptional activator                                          | 0.56  |
| b2707 | srIR | Isolate 1 | non-essential | DNA-binding transcriptional repressor                                          | 3.49  |
| b2707 | srIR | Isolate 2 | non-essential | DNA-binding transcriptional repressor                                          | -1.78 |
| b2708 | gutQ | Isolate 1 | non-essential | predicted phosphosugar-binding protein                                         | -1.53 |
| b2708 | gutQ | Isolate 2 | non-essential | predicted phosphosugar-binding protein                                         | -1.30 |
| b2709 | norR | Isolate 1 | non-essential | DNA-binding transcriptional activator                                          | -1.48 |
| b2709 | norR | Isolate 2 | non-essential | DNA-binding transcriptional activator                                          | -2.87 |
| b2710 | norV | Isolate 1 | non-essential | flavorubredoxin oxidoreductase                                                 | -4.08 |
| b2710 | norV | Isolate 2 | non-essential | flavorubredoxin oxidoreductase                                                 | -1.58 |
| b2711 | norW | Isolate 1 | non-essential | NADH:flavorubredoxin oxidoreductase                                            | -2.30 |
| b2711 | norW | Isolate 2 | non-essential | NADH:flavorubredoxin oxidoreductase                                            | 0.59  |
| b2712 | hypF | Isolate 1 | non-essential | carbamoyl phosphate phosphatase and maturation protein for [NiFe] hydrogenases | -0.50 |
| b2712 | hypF | Isolate 2 | non-essential | carbamoyl phosphate phosphatase and maturation protein for [NiFe] hydrogenases | 0.85  |
| b2713 | hydN | Isolate 1 | non-essential | formate dehydrogenase-H, [4Fe-4S] ferredoxin subunit                           | -0.06 |
| b2713 | hydN | Isolate 2 | non-essential | formate dehydrogenase-H, [4Fe-4S] ferredoxin subunit                           | 0.10  |
| b2714 | ascG | Isolate 1 | non-essential | DNA-binding transcriptional regulator                                          | 0.28  |
| b2714 | ascG | Isolate 2 | non-essential | DNA-binding transcriptional regulator                                          | 0.01  |
| b2715 | ascF | Isolate 1 | non-essential | fused cellobiose/arbutin/salicin-specific enzyme IIBC component of PTS         | 1.45  |
| b2715 | ascF | Isolate 2 | non-essential | fused cellobiose/arbutin/salicin-specific enzyme IIBC component of PTS         | -0.34 |
| b2716 | ascB | Isolate 1 | non-essential | cryptic 6-phospho-beta-glucosidase                                             | 0.20  |
| b2716 | ascB | Isolate 2 | non-essential | cryptic 6-phospho-beta-glucosidase                                             | 0.37  |
| b2717 | hycI | Isolate 1 | non-essential | protease involved in processing C-terminal end of HycE                         | -4.04 |
| b2717 | hycI | Isolate 2 | non-essential | protease involved in processing C-terminal end of HycE                         | -2.40 |
| b2718 | hycH | Isolate 1 | non-essential | protein required for maturation of hydrogenase 3                               | -0.55 |
| b2718 | hycH | Isolate 2 | non-essential | protein required for maturation of hydrogenase 3                               | -2.84 |
| b2719 | hycG | Isolate 1 | non-essential | hydrogenase 3 and formate hydrogenase complex, HycG subunit                    | -2.62 |
| b2719 | hycG | Isolate 2 | non-essential | hydrogenase 3 and formate hydrogenase complex, HycG subunit                    | -2.49 |
| b2720 | hycF | Isolate 1 | non-essential | formate hydrogenlyase complex iron-sulfur protein                              | -1.78 |
| b2720 | hycF | Isolate 2 | non-essential | formate hydrogenlyase complex iron-sulfur protein                              | 0.12  |
| b2721 | hycE | Isolate 1 | non-essential | hydrogenase 3, large subunit                                                   | -2.01 |
| b2721 | hycE | Isolate 2 | non-essential | hydrogenase 3, large subunit                                                   | -2.29 |
| b2722 | hycD | Isolate 1 | non-essential | hydrogenase 3, membrane subunit                                                | -1.21 |
| b2722 | hycD | Isolate 2 | non-essential | hydrogenase 3, membrane subunit                                                | -1.68 |
| b2723 | hycC | Isolate 1 | non-essential | hydrogenase 3, membrane subunit                                                | -1.76 |
| b2723 | hycC | Isolate 2 | non-essential | hydrogenase 3, membrane subunit                                                | -3.98 |
| b2724 | hycB | Isolate 1 | non-essential | hydrogenase 3, Fe-S subunit                                                    | -2.56 |
| b2724 | hycB | Isolate 2 | non-essential | hydrogenase 3, Fe-S subunit                                                    | -2.49 |

|       |      |           |               |                                                                   |       |
|-------|------|-----------|---------------|-------------------------------------------------------------------|-------|
| b2725 | hycA | Isolate 1 | non-essential | regulator of the transcriptional regulator FhlA                   | 1.27  |
| b2725 | hycA | Isolate 2 | non-essential | regulator of the transcriptional regulator FhlA                   | -1.23 |
| b2726 | hypA | Isolate 1 | non-essential | protein involved in nickel insertion into hydrogenases 3          | -2.82 |
| b2726 | hypA | Isolate 2 | non-essential | protein involved in nickel insertion into hydrogenases 3          | -0.26 |
| b2727 | hypB | Isolate 1 | non-essential | GTP hydrolase involved in nickel liganding into hydrogenases      | -3.65 |
| b2727 | hypB | Isolate 2 | non-essential | GTP hydrolase involved in nickel liganding into hydrogenases      | -2.20 |
| b2728 | hypC | Isolate 1 | non-essential | protein required for maturation of hydrogenases 1 and 3           | -2.03 |
| b2728 | hypC | Isolate 2 | non-essential | protein required for maturation of hydrogenases 1 and 3           | -0.70 |
| b2729 | hypD | Isolate 1 | non-essential | protein required for maturation of hydrogenases                   | -3.27 |
| b2729 | hypD | Isolate 2 | non-essential | protein required for maturation of hydrogenases                   | 1.08  |
| b2730 | hypE | Isolate 1 | non-essential | carbamoyl phosphate phosphatase, hydrogenase 3 maturation protein | -1.22 |
| b2730 | hypE | Isolate 2 | non-essential | carbamoyl phosphate phosphatase, hydrogenase 3 maturation protein | -1.16 |
| b2731 | fhlA | Isolate 1 | non-essential | DNA-binding transcriptional activator                             | -2.10 |
| b2731 | fhlA | Isolate 2 | non-essential | DNA-binding transcriptional activator                             | -5.07 |
| b2732 | ygbA | Isolate 1 | non-essential | predicted protein                                                 | -1.22 |
| b2732 | ygbA | Isolate 2 | non-essential | predicted protein                                                 | -2.40 |
| b2733 | mutS | Isolate 1 | non-essential | methyl-directed mismatch repair protein                           | -3.10 |
| b2733 | mutS | Isolate 2 | non-essential | methyl-directed mismatch repair protein                           | -0.75 |
| b2734 | pphB | Isolate 1 | non-essential | serine/threonine-specific protein phosphatase 2                   | -1.92 |
| b2734 | pphB | Isolate 2 | non-essential | serine/threonine-specific protein phosphatase 2                   | -3.41 |
| b2735 | ygbI | Isolate 1 | non-essential | predicted DNA-binding transcriptional regulator                   | 0.08  |
| b2735 | ygbI | Isolate 2 | non-essential | predicted DNA-binding transcriptional regulator                   | -2.86 |
| b2736 | ygbJ | Isolate 1 | non-essential | predicted dehydrogenase, with NAD(P)-binding Rossmann-fold domain | -3.10 |
| b2736 | ygbJ | Isolate 2 | non-essential | predicted dehydrogenase, with NAD(P)-binding Rossmann-fold domain | -2.09 |
| b2737 | ygbK | Isolate 1 | non-essential | conserved protein                                                 | -4.80 |
| b2737 | ygbK | Isolate 2 | non-essential | conserved protein                                                 | -2.37 |
| b2738 | ygbL | Isolate 1 | non-essential | predicted class II aldolase                                       | -2.92 |
| b2738 | ygbL | Isolate 2 | non-essential | predicted class II aldolase                                       | -0.20 |
| b2739 | ygbM | Isolate 1 | non-essential | conserved protein                                                 | -2.58 |
| b2739 | ygbM | Isolate 2 | non-essential | conserved protein                                                 | -2.00 |
| b2740 | ygbN | Isolate 1 | non-essential | predicted transporter                                             | -1.64 |
| b2740 | ygbN | Isolate 2 | non-essential | predicted transporter                                             | -3.93 |
| b2741 | rpoS | Isolate 1 | non-essential | RNA polymerase, sigma S (sigma 38) factor                         | -0.59 |
| b2741 | rpoS | Isolate 2 | non-essential | RNA polymerase, sigma S (sigma 38) factor                         | -1.56 |
| b2742 | nlpD | Isolate 1 | non-essential | predicted outer membrane lipoprotein                              | -1.47 |
| b2742 | nlpD | Isolate 2 | non-essential | predicted outer membrane lipoprotein                              | -1.40 |
| b2743 | pcm  | Isolate 1 | non-essential | L-isoaspartate protein carboxylmethyltransferase type II          | -2.51 |
| b2743 | pcm  | Isolate 2 | non-essential | L-isoaspartate protein carboxylmethyltransferase type II          | -4.33 |
| b2744 | surE | Isolate 1 | non-essential | broad specificity 5'(3')-nucleotidase and polyphosphatase         | -0.68 |
| b2744 | surE | Isolate 2 | non-essential | broad specificity 5'(3')-nucleotidase and polyphosphatase         | 0.00  |
| b2745 | truD | Isolate 1 | non-essential | pseudouridine synthase                                            | -2.05 |
| b2745 | truD | Isolate 2 | non-essential | pseudouridine synthase                                            | -3.31 |
| b2746 | ispF | Isolate 1 | essential     | 2C-methyl-D-erythritol 2,4-cyclodiphosphate synthase              | 3.87  |

|       |      |           |               |                                                           |        |
|-------|------|-----------|---------------|-----------------------------------------------------------|--------|
| b2749 | ygbE | Isolate 1 | non-essential | conserved inner membrane protein                          | -4.34  |
| b2749 | ygbE | Isolate 2 | non-essential | conserved inner membrane protein                          | -6.53  |
| b2750 | cysC | Isolate 1 | non-essential | adenosine 5'-phosphosulfate kinase                        | -6.49  |
| b2750 | cysC | Isolate 2 | non-essential | adenosine 5'-phosphosulfate kinase                        | -6.68  |
| b2751 | cysN | Isolate 1 | non-essential | sulfate adenyltransferase, subunit 1                      | -2.78  |
| b2751 | cysN | Isolate 2 | non-essential | sulfate adenyltransferase, subunit 1                      | -2.74  |
| b2752 | cysD | Isolate 1 | non-essential | sulfate adenyltransferase, subunit 2                      | -1.75  |
| b2752 | cysD | Isolate 2 | non-essential | sulfate adenyltransferase, subunit 2                      | -5.59  |
| b2753 | iap  | Isolate 1 | non-essential | aminopeptidase in alkaline phosphatase isozyme conversion | -10.72 |
| b2753 | iap  | Isolate 2 | non-essential | aminopeptidase in alkaline phosphatase isozyme conversion | -9.89  |
| b2754 | ygbF | Isolate 1 | non-essential | predicted protein                                         | -10.07 |
| b2754 | ygbF | Isolate 2 | non-essential | predicted protein                                         | -11.36 |
| b2755 | ygbT | Isolate 1 | non-essential | conserved protein                                         | -9.27  |
| b2755 | ygbT | Isolate 2 | non-essential | conserved protein                                         | -2.80  |
| b2756 | ygcH | Isolate 1 | non-essential | predicted protein                                         | -7.11  |
| b2756 | ygcH | Isolate 2 | non-essential | predicted protein                                         | -8.02  |
| b2757 | ygcI | Isolate 1 | non-essential | predicted protein                                         | -10.77 |
| b2757 | ygcI | Isolate 2 | non-essential | predicted protein                                         | -12.43 |
| b2758 | ygcJ | Isolate 1 | non-essential | predicted protein                                         | -12.16 |
| b2758 | ygcJ | Isolate 2 | non-essential | predicted protein                                         | -6.77  |
| b2759 | ygcK | Isolate 1 | non-essential | predicted protein                                         | -6.61  |
| b2759 | ygcK | Isolate 2 | non-essential | predicted protein                                         | -6.98  |
| b2760 | ygcL | Isolate 1 | non-essential | predicted protein                                         | -8.02  |
| b2760 | ygcL | Isolate 2 | non-essential | predicted protein                                         | -5.97  |
| b2761 | ygcB | Isolate 1 | non-essential | conserved protein, member of DEAD box family              | -2.36  |
| b2761 | ygcB | Isolate 2 | non-essential | conserved protein, member of DEAD box family              | -3.63  |
| b2762 | cysH | Isolate 1 | non-essential | 3'-phosphoadenosine 5'-phosphosulfate reductase           | -5.19  |
| b2762 | cysH | Isolate 2 | non-essential | 3'-phosphoadenosine 5'-phosphosulfate reductase           | -4.51  |
| b2763 | cysI | Isolate 1 | non-essential | sulfite reductase, beta subunit, NAD(P)-binding           | -4.12  |
| b2763 | cysI | Isolate 2 | non-essential | sulfite reductase, beta subunit, NAD(P)-binding           | 0.46   |
| b2764 | cysJ | Isolate 1 | non-essential | sulfite reductase, alpha subunit, flavoprotein            | -2.34  |
| b2764 | cysJ | Isolate 2 | non-essential | sulfite reductase, alpha subunit, flavoprotein            | -2.52  |
| b2765 | ygcM | Isolate 1 | non-essential | 6-pyruvoyl tetrahydrobiopterin synthase (PTPS)            | -0.96  |
| b2765 | ygcM | Isolate 2 | non-essential | 6-pyruvoyl tetrahydrobiopterin synthase (PTPS)            | -1.03  |
| b2766 | ygcN | Isolate 1 | non-essential | predicted oxidoreductase, FAD/NAD(P)-binding domain       | 0.01   |
| b2766 | ygcN | Isolate 2 | non-essential | predicted oxidoreductase, FAD/NAD(P)-binding domain       | -4.95  |
| b2767 | ygcO | Isolate 1 | non-essential | predicted 4Fe-4S cluster-containing protein               | 2.64   |
| b2767 | ygcO | Isolate 2 | non-essential | predicted 4Fe-4S cluster-containing protein               | -3.52  |
| b2768 | ygcP | Isolate 1 | non-essential | predicted anti-terminator regulatory protein              | 1.83   |
| b2768 | ygcP | Isolate 2 | non-essential | predicted anti-terminator regulatory protein              | 1.01   |
| b2769 | ygcQ | Isolate 1 | non-essential | predicted flavoprotein                                    | -1.69  |
| b2769 | ygcQ | Isolate 2 | non-essential | predicted flavoprotein                                    | -2.68  |
| b2770 | ygcR | Isolate 1 | non-essential | predicted flavoprotein                                    | -4.77  |

|       |      |           |               |                                                                               |       |
|-------|------|-----------|---------------|-------------------------------------------------------------------------------|-------|
| b2770 | ygcR | Isolate 2 | non-essential | predicted flavoprotein                                                        | -3.35 |
| b2771 | ygcS | Isolate 1 | non-essential | predicted transporter                                                         | -1.21 |
| b2771 | ygcS | Isolate 2 | non-essential | predicted transporter                                                         | -0.46 |
| b2774 | ygcW | Isolate 1 | non-essential | predicted deoxygluconate dehydrogenase                                        | -1.50 |
| b2774 | ygcW | Isolate 2 | non-essential | predicted deoxygluconate dehydrogenase                                        | -1.31 |
| b2775 | yqcE | Isolate 1 | non-essential | predicted transporter                                                         | -3.47 |
| b2775 | yqcE | Isolate 2 | non-essential | predicted transporter                                                         | -1.00 |
| b2776 | ygcE | Isolate 1 | non-essential | predicted kinase                                                              | -1.98 |
| b2776 | ygcE | Isolate 2 | non-essential | predicted kinase                                                              | 0.11  |
| b2777 | ygcF | Isolate 1 | non-essential | conserved protein                                                             | -0.21 |
| b2777 | ygcF | Isolate 2 | non-essential | conserved protein                                                             | -0.91 |
| b2778 | ygcG | Isolate 1 | non-essential | predicted protein                                                             | -3.78 |
| b2778 | ygcG | Isolate 2 | non-essential | predicted protein                                                             | -0.37 |
| b2779 | eno  | Isolate 1 | essential     | enolase                                                                       | 0.86  |
| b2781 | mazG | Isolate 1 | non-essential | nucleoside triphosphate pyrophosphohydrolase                                  | -2.69 |
| b2781 | mazG | Isolate 2 | non-essential | nucleoside triphosphate pyrophosphohydrolase                                  | -1.06 |
| b2782 | chpA | Isolate 1 | non-essential | toxin of the ChpA-ChpR toxin-antitoxin system, endoribonuclease               | -2.82 |
| b2782 | chpA | Isolate 2 | non-essential | toxin of the ChpA-ChpR toxin-antitoxin system, endoribonuclease               | 0.53  |
| b2784 | relA | Isolate 1 | non-essential | (p)ppGpp synthetase I/GTP pyrophosphokinase                                   | -1.05 |
| b2784 | relA | Isolate 2 | non-essential | (p)ppGpp synthetase I/GTP pyrophosphokinase                                   | 0.00  |
| b2785 | rumA | Isolate 1 | non-essential | 23S rRNA (uracil-5)-methyltransferase                                         | -2.93 |
| b2785 | rumA | Isolate 2 | non-essential | 23S rRNA (uracil-5)-methyltransferase                                         | -2.03 |
| b2786 | barA | Isolate 1 | non-essential | hybrid sensory histidine kinase, in two-component regulatory system with UvrY | -1.13 |
| b2786 | barA | Isolate 2 | non-essential | hybrid sensory histidine kinase, in two-component regulatory system with UvrY | -1.42 |
| b2787 | gudD | Isolate 1 | non-essential | (D)-glucarate dehydratase 1                                                   | -2.45 |
| b2787 | gudD | Isolate 2 | non-essential | (D)-glucarate dehydratase 1                                                   | -0.66 |
| b2788 | gudX | Isolate 1 | non-essential | predicted glucarate dehydratase                                               | -1.46 |
| b2788 | gudX | Isolate 2 | non-essential | predicted glucarate dehydratase                                               | -1.28 |
| b2789 | gudP | Isolate 1 | non-essential | predicted D-glucarate transporter                                             | -2.40 |
| b2789 | gudP | Isolate 2 | non-essential | predicted D-glucarate transporter                                             | -0.09 |
| b2790 | yqcA | Isolate 1 | non-essential | predicted flavoprotein                                                        | -1.78 |
| b2790 | yqcA | Isolate 2 | non-essential | predicted flavoprotein                                                        | -1.65 |
| b2791 | yqcB | Isolate 1 | non-essential | tRNA pseudouridine synthase                                                   | -3.08 |
| b2791 | yqcB | Isolate 2 | non-essential | tRNA pseudouridine synthase                                                   | -3.49 |
| b2792 | yqcC | Isolate 1 | non-essential | conserved protein                                                             | -2.75 |
| b2792 | yqcC | Isolate 2 | non-essential | conserved protein                                                             | -2.04 |
| b2793 | syd  | Isolate 1 | non-essential | predicted protein                                                             | -0.88 |
| b2793 | syd  | Isolate 2 | non-essential | predicted protein                                                             | -1.68 |
| b2794 | yqcD | Isolate 1 | non-essential | conserved protein                                                             | -2.84 |
| b2794 | yqcD | Isolate 2 | non-essential | conserved protein                                                             | -0.27 |
| b2795 | ygdH | Isolate 1 | non-essential | conserved protein                                                             | -3.33 |
| b2795 | ygdH | Isolate 2 | non-essential | conserved protein                                                             | -0.03 |
| b2796 | sdaC | Isolate 1 | non-essential | predicted serine transporter                                                  | -2.14 |

|       |      |           |               |                                                                                    |       |
|-------|------|-----------|---------------|------------------------------------------------------------------------------------|-------|
| b2796 | sdaC | Isolate 2 | non-essential | predicted serine transporter                                                       | -0.88 |
| b2797 | sdaB | Isolate 1 | non-essential | L-serine deaminase II                                                              | -0.91 |
| b2797 | sdaB | Isolate 2 | non-essential | L-serine deaminase II                                                              | -0.80 |
| b2798 | exo  | Isolate 1 | non-essential | exonuclease IX (5'-3' exonuclease)                                                 | 0.75  |
| b2798 | exo  | Isolate 2 | non-essential | exonuclease IX (5'-3' exonuclease)                                                 | 0.79  |
| b2799 | fucO | Isolate 1 | non-essential | L-1,2-propanediol oxidoreductase                                                   | 0.00  |
| b2799 | fucO | Isolate 2 | non-essential | L-1,2-propanediol oxidoreductase                                                   | -1.74 |
| b2800 | fucA | Isolate 1 | non-essential | L-fucose-1-phosphate aldolase                                                      | -4.65 |
| b2800 | fucA | Isolate 2 | non-essential | L-fucose-1-phosphate aldolase                                                      | -0.98 |
| b2801 | fucP | Isolate 1 | non-essential | L-fucose transporter                                                               | -1.12 |
| b2801 | fucP | Isolate 2 | non-essential | L-fucose transporter                                                               | -0.96 |
| b2802 | fucI | Isolate 1 | non-essential | L-fucose isomerase                                                                 | -2.98 |
| b2802 | fucI | Isolate 2 | non-essential | L-fucose isomerase                                                                 | -2.27 |
| b2803 | fucK | Isolate 1 | non-essential | L-fuculokinase                                                                     | -1.49 |
| b2803 | fucK | Isolate 2 | non-essential | L-fuculokinase                                                                     | -2.65 |
| b2804 | fucU | Isolate 1 | non-essential | L-fucose mutarotase                                                                | -2.39 |
| b2804 | fucU | Isolate 2 | non-essential | L-fucose mutarotase                                                                | -3.89 |
| b2805 | fucR | Isolate 1 | non-essential | DNA-binding transcriptional activator                                              | 0.03  |
| b2805 | fucR | Isolate 2 | non-essential | DNA-binding transcriptional activator                                              | -1.10 |
| b2806 | ygdE | Isolate 1 | non-essential | predicted methyltransferase                                                        | -1.61 |
| b2806 | ygdE | Isolate 2 | non-essential | predicted methyltransferase                                                        | -0.27 |
| b2807 | ygdD | Isolate 1 | non-essential | conserved inner membrane protein                                                   | -7.69 |
| b2807 | ygdD | Isolate 2 | non-essential | conserved inner membrane protein                                                   | -3.15 |
| b2808 | gcvA | Isolate 1 | non-essential | DNA-binding transcriptional dual regulator                                         | 1.36  |
| b2808 | gcvA | Isolate 2 | non-essential | DNA-binding transcriptional dual regulator                                         | -2.45 |
| b2809 | ygdI | Isolate 1 | non-essential | predicted protein                                                                  | 0.21  |
| b2809 | ygdI | Isolate 2 | non-essential | predicted protein                                                                  | -0.50 |
| b2810 | csdA | Isolate 1 | non-essential | cysteine sulfinatase desulfinate                                                   | -1.16 |
| b2810 | csdA | Isolate 2 | non-essential | cysteine sulfinatase desulfinate                                                   | 0.64  |
| b2811 | ygdK | Isolate 1 | non-essential | predicted Fe-S metabolism protein                                                  | 2.87  |
| b2811 | ygdK | Isolate 2 | non-essential | predicted Fe-S metabolism protein                                                  | 1.84  |
| b2812 | ygdL | Isolate 1 | non-essential | conserved protein                                                                  | -0.15 |
| b2812 | ygdL | Isolate 2 | non-essential | conserved protein                                                                  | -2.72 |
| b2813 | mltA | Isolate 1 | non-essential | membrane-bound lytic murein transglycosylase A                                     | -1.05 |
| b2813 | mltA | Isolate 2 | non-essential | membrane-bound lytic murein transglycosylase A                                     | -2.45 |
| b2817 | amiC | Isolate 1 | non-essential | N-acetylmuramoyl-L-alanine amidase                                                 | 2.66  |
| b2817 | amiC | Isolate 2 | non-essential | N-acetylmuramoyl-L-alanine amidase                                                 | -0.60 |
| b2818 | argA | Isolate 1 | non-essential | fused acetylglutamate kinase homolog (inactive) -!- amino acid N-acetyltransferase | 0.73  |
| b2818 | argA | Isolate 2 | non-essential | fused acetylglutamate kinase homolog (inactive) -!- amino acid N-acetyltransferase | 0.55  |
| b2819 | recD | Isolate 1 | non-essential | exonuclease V (RecBCD complex), alpha chain                                        | 3.70  |
| b2819 | recD | Isolate 2 | non-essential | exonuclease V (RecBCD complex), alpha chain                                        | 0.67  |
| b2820 | recB | Isolate 1 | non-essential | exonuclease V (RecBCD complex), beta subunit                                       | -1.84 |
| b2820 | recB | Isolate 2 | non-essential | exonuclease V (RecBCD complex), beta subunit                                       | -1.95 |

|       |      |           |               |                                                                                                   |        |
|-------|------|-----------|---------------|---------------------------------------------------------------------------------------------------|--------|
| b2821 | ptr  | Isolate 1 | non-essential | protease III                                                                                      | -0.87  |
| b2821 | ptr  | Isolate 2 | non-essential | protease III                                                                                      | -1.49  |
| b2822 | recC | Isolate 1 | non-essential | exonuclease V (RecBCD complex), gamma chain                                                       | -1.53  |
| b2822 | recC | Isolate 2 | non-essential | exonuclease V (RecBCD complex), gamma chain                                                       | -0.78  |
| b2823 | ppdC | Isolate 1 | non-essential | predicted protein                                                                                 | -2.34  |
| b2823 | ppdC | Isolate 2 | non-essential | predicted protein                                                                                 | -0.96  |
| b2824 | ygdB | Isolate 1 | non-essential | predicted protein                                                                                 | -4.68  |
| b2824 | ygdB | Isolate 2 | non-essential | predicted protein                                                                                 | -1.48  |
| b2825 | ppdB | Isolate 1 | non-essential | conserved protein                                                                                 | -1.64  |
| b2825 | ppdB | Isolate 2 | non-essential | conserved protein                                                                                 | -2.19  |
| b2826 | ppdA | Isolate 1 | non-essential | conserved protein                                                                                 | -0.95  |
| b2826 | ppdA | Isolate 2 | non-essential | conserved protein                                                                                 | -1.22  |
| b2827 | thyA | Isolate 1 | non-essential | thymidylate synthetase                                                                            | 0.05   |
| b2827 | thyA | Isolate 2 | non-essential | thymidylate synthetase                                                                            | 0.02   |
| b2829 | ptsP | Isolate 1 | non-essential | fused PEP-protein phosphotransferase (enzyme I) of PTS system                                     | 0.70   |
| b2829 | ptsP | Isolate 2 | non-essential | fused PEP-protein phosphotransferase (enzyme I) of PTS system                                     | 0.92   |
| b2830 | nudH | Isolate 1 | non-essential | nucleotide hydrolase                                                                              | -9.35  |
| b2830 | nudH | Isolate 2 | non-essential | nucleotide hydrolase                                                                              | -4.23  |
| b2831 | mutH | Isolate 1 | non-essential | methyl-directed mismatch repair protein                                                           | -0.27  |
| b2831 | mutH | Isolate 2 | non-essential | methyl-directed mismatch repair protein                                                           | -1.17  |
| b2832 | ygdQ | Isolate 1 | non-essential | predicted inner membrane protein                                                                  | -0.34  |
| b2832 | ygdQ | Isolate 2 | non-essential | predicted inner membrane protein                                                                  | 2.03   |
| b2833 | ygdR | Isolate 1 | non-essential | predicted protein                                                                                 | -1.60  |
| b2833 | ygdR | Isolate 2 | non-essential | predicted protein                                                                                 | 0.79   |
| b2834 | tas  | Isolate 1 | non-essential | predicted oxidoreductase, NADP(H)-dependent aldo-keto reductase                                   | -0.26  |
| b2834 | tas  | Isolate 2 | non-essential | predicted oxidoreductase, NADP(H)-dependent aldo-keto reductase                                   | -0.05  |
| b2835 | ygeD | Isolate 1 | non-essential | predicted inner membrane protein                                                                  | 1.34   |
| b2835 | ygeD | Isolate 2 | non-essential | predicted inner membrane protein                                                                  | -0.64  |
| b2836 | aas  | Isolate 1 | non-essential | fused 2-acylglycerophospho-ethanolamine acyl transferase -!- acyl-acyl carrier protein synthetase | 0.76   |
| b2836 | aas  | Isolate 2 | non-essential | fused 2-acylglycerophospho-ethanolamine acyl transferase -!- acyl-acyl carrier protein synthetase | 0.90   |
| b2837 | galR | Isolate 1 | non-essential | DNA-binding transcriptional repressor                                                             | 0.62   |
| b2837 | galR | Isolate 2 | non-essential | DNA-binding transcriptional repressor                                                             | 1.77   |
| b2838 | lysA | Isolate 1 | non-essential | diaminopimelate decarboxylase, PLP-binding                                                        | 0.02   |
| b2838 | lysA | Isolate 2 | non-essential | diaminopimelate decarboxylase, PLP-binding                                                        | -0.89  |
| b2839 | lysR | Isolate 1 | non-essential | DNA-binding transcriptional dual regulator                                                        | 0.46   |
| b2839 | lysR | Isolate 2 | non-essential | DNA-binding transcriptional dual regulator                                                        | -0.79  |
| b2840 | ygeA | Isolate 1 | non-essential | predicted racemase                                                                                | 1.60   |
| b2840 | ygeA | Isolate 2 | non-essential | predicted racemase                                                                                | -0.76  |
| b2841 | araE | Isolate 1 | non-essential | arabinose transporter                                                                             | 0.21   |
| b2841 | araE | Isolate 2 | non-essential | arabinose transporter                                                                             | 1.81   |
| b2842 | kduD | Isolate 1 | non-essential | 2-deoxy-D-gluconate 3-dehydrogenase                                                               | -10.37 |
| b2842 | kduD | Isolate 2 | non-essential | 2-deoxy-D-gluconate 3-dehydrogenase                                                               | -1.02  |
| b2843 | kduI | Isolate 1 | non-essential | predicted 5-keto 4-deoxyuronate isomerase                                                         | -0.57  |

|       |      |           |               |                                                     |       |
|-------|------|-----------|---------------|-----------------------------------------------------|-------|
| b2843 | kduI | Isolate 2 | non-essential | predicted 5-keto 4-deoxyuronate isomerase           | 0.45  |
| b2844 | yqeF | Isolate 1 | non-essential | predicted acyltransferase                           | 0.10  |
| b2844 | yqeF | Isolate 2 | non-essential | predicted acyltransferase                           | 0.43  |
| b2845 | yqeG | Isolate 1 | non-essential | predicted transporter                               | -0.52 |
| b2845 | yqeG | Isolate 2 | non-essential | predicted transporter                               | -2.67 |
| b2846 | yqeH | Isolate 1 | non-essential | conserved protein with bipartite regulator domain   | -0.24 |
| b2846 | yqeH | Isolate 2 | non-essential | conserved protein with bipartite regulator domain   | -0.90 |
| b2847 | yqeI | Isolate 1 | non-essential | predicted transcriptional regulator                 | 0.66  |
| b2847 | yqeI | Isolate 2 | non-essential | predicted transcriptional regulator                 | -2.61 |
| b2848 | yqeJ | Isolate 1 | non-essential | predicted protein                                   | -0.13 |
| b2848 | yqeJ | Isolate 2 | non-essential | predicted protein                                   | -1.12 |
| b2849 | yqeK | Isolate 1 | non-essential | predicted protein                                   | -0.69 |
| b2849 | yqeK | Isolate 2 | non-essential | predicted protein                                   | -0.44 |
| b2850 | ygeF | Isolate 1 | non-essential | predicted protein                                   | -2.26 |
| b2850 | ygeF | Isolate 2 | non-essential | predicted protein                                   | -0.67 |
| b2851 | ygeG | Isolate 1 | non-essential | predicted chaperone                                 | -1.15 |
| b2851 | ygeG | Isolate 2 | non-essential | predicted chaperone                                 | -2.52 |
| b2852 | ygeH | Isolate 1 | non-essential | predicted transcriptional regulator                 | 1.07  |
| b2852 | ygeH | Isolate 2 | non-essential | predicted transcriptional regulator                 | -0.12 |
| b2853 | ygeI | Isolate 1 | non-essential | predicted protein                                   | -2.53 |
| b2853 | ygeI | Isolate 2 | non-essential | predicted protein                                   | -1.31 |
| b2854 | pbl  | Isolate 1 | *             | predicted peptidoglycan-binding enzyme (pseudogene) | 0.36  |
| b2854 | pbl  | Isolate 2 | *             | predicted peptidoglycan-binding enzyme (pseudogene) | -1.68 |
| b2855 | ygeK | Isolate 1 | non-essential | predicted DNA-binding transcriptional regulator     | 1.92  |
| b2855 | ygeK | Isolate 2 | non-essential | predicted DNA-binding transcriptional regulator     | -0.48 |
| b2856 | ygeL | Isolate 1 | non-essential | predicted protein                                   | -0.68 |
| b2856 | ygeL | Isolate 2 | non-essential | predicted protein                                   | 0.18  |
| b2857 | ygeM | Isolate 1 | non-essential | predicted protein                                   | 0.26  |
| b2857 | ygeM | Isolate 2 | non-essential | predicted protein                                   | 1.35  |
| b2858 | ygeN | Isolate 1 | *             | predicted protein (pseudogene)                      | -1.29 |
| b2858 | ygeN | Isolate 2 | *             | predicted protein (pseudogene)                      | -1.29 |
| b2859 | ygeO | Isolate 1 | non-essential | predicted protein                                   | -1.03 |
| b2859 | ygeO | Isolate 2 | non-essential | predicted protein                                   | -1.30 |
| b2862 | ygeP | Isolate 1 | non-essential | predicted protein                                   | -1.43 |
| b2862 | ygeP | Isolate 2 | non-essential | predicted protein                                   | 0.41  |
| b2863 | ygeQ | Isolate 1 | non-essential | predicted protein                                   | 0.18  |
| b2863 | ygeQ | Isolate 2 | non-essential | predicted protein                                   | 0.23  |
| b2865 | ygeR | Isolate 1 | non-essential | Tetratricopeptide repeat transcriptional regulator  | 0.71  |
| b2865 | ygeR | Isolate 2 | non-essential | Tetratricopeptide repeat transcriptional regulator  | -0.16 |
| b2866 | xdhA | Isolate 1 | non-essential | xanthine dehydrogenase, molybdenum binding subunit  | -0.78 |
| b2866 | xdhA | Isolate 2 | non-essential | xanthine dehydrogenase, molybdenum binding subunit  | -1.16 |
| b2867 | xdhB | Isolate 1 | non-essential | xanthine dehydrogenase, FAD-binding subunit         | -0.07 |
| b2867 | xdhB | Isolate 2 | non-essential | xanthine dehydrogenase, FAD-binding subunit         | -1.10 |



|       |      |           |               |                                                                                                       |       |
|-------|------|-----------|---------------|-------------------------------------------------------------------------------------------------------|-------|
| b2868 | xdhC | Isolate 1 | non-essential | xanthine dehydrogenase, Fe-S binding subunit                                                          | -1.54 |
| b2868 | xdhC | Isolate 2 | non-essential | xanthine dehydrogenase, Fe-S binding subunit                                                          | -1.25 |
| b2869 | ygeV | Isolate 1 | non-essential | predicted DNA-binding transcriptional regulator                                                       | 1.93  |
| b2869 | ygeV | Isolate 2 | non-essential | predicted DNA-binding transcriptional regulator                                                       | 2.81  |
| b2870 | ygeW | Isolate 1 | non-essential | conserved protein                                                                                     | -0.47 |
| b2870 | ygeW | Isolate 2 | non-essential | conserved protein                                                                                     | -0.32 |
| b2871 | ygeX | Isolate 1 | non-essential | 2,3-diaminopropionate ammonia-lyase                                                                   | -0.03 |
| b2871 | ygeX | Isolate 2 | non-essential | 2,3-diaminopropionate ammonia-lyase                                                                   | -1.20 |
| b2872 | ygeY | Isolate 1 | non-essential | predicted peptidase                                                                                   | -0.69 |
| b2872 | ygeY | Isolate 2 | non-essential | predicted peptidase                                                                                   | -1.63 |
| b2873 | hyuA | Isolate 1 | non-essential | D-stereospecific phenylhydantoinase                                                                   | 0.85  |
| b2873 | hyuA | Isolate 2 | non-essential | D-stereospecific phenylhydantoinase                                                                   | -0.53 |
| b2874 | yqeA | Isolate 1 | non-essential | predicted amino acid kinase                                                                           | -2.46 |
| b2874 | yqeA | Isolate 2 | non-essential | predicted amino acid kinase                                                                           | -0.40 |
| b2875 | yqeB | Isolate 1 | non-essential | conserved protein with NAD(P)-binding Rossmann fold                                                   | -0.42 |
| b2875 | yqeB | Isolate 2 | non-essential | conserved protein with NAD(P)-binding Rossmann fold                                                   | -1.70 |
| b2876 | yqeC | Isolate 1 | non-essential | conserved protein                                                                                     | -1.85 |
| b2876 | yqeC | Isolate 2 | non-essential | conserved protein                                                                                     | -1.35 |
| b2877 | ygfJ | Isolate 1 | non-essential | conserved protein                                                                                     | -1.19 |
| b2877 | ygfJ | Isolate 2 | non-essential | conserved protein                                                                                     | -1.03 |
| b2878 | ygfK | Isolate 1 | non-essential | predicted oxidoreductase, Fe-S subunit                                                                | -0.43 |
| b2878 | ygfK | Isolate 2 | non-essential | predicted oxidoreductase, Fe-S subunit                                                                | -0.89 |
| b2879 | ssnA | Isolate 1 | non-essential | predicted chlorohydrolase/aminohydrolase                                                              | 2.28  |
| b2879 | ssnA | Isolate 2 | non-essential | predicted chlorohydrolase/aminohydrolase                                                              | 2.21  |
| b2880 | ygfM | Isolate 1 | non-essential | predicted oxidoreductase                                                                              | -2.01 |
| b2880 | ygfM | Isolate 2 | non-essential | predicted oxidoreductase                                                                              | -2.00 |
| b2881 | xdhD | Isolate 1 | non-essential | fused predicted xanthine/hypoxanthine oxidase, molybdopterin-binding subunit -!- Fe-S binding subunit | -0.12 |
| b2881 | xdhD | Isolate 2 | non-essential | fused predicted xanthine/hypoxanthine oxidase, molybdopterin-binding subunit -!- Fe-S binding subunit | 1.32  |
| b2882 | ygfO | Isolate 1 | non-essential | predicted transporter                                                                                 | 0.19  |
| b2882 | ygfO | Isolate 2 | non-essential | predicted transporter                                                                                 | 0.00  |
| b2883 | guaD | Isolate 1 | non-essential | guanine deaminase                                                                                     | -0.10 |
| b2883 | guaD | Isolate 2 | non-essential | guanine deaminase                                                                                     | 0.14  |
| b2886 | ygfS | Isolate 1 | non-essential | predicted oxidoreductase, 4Fe-4S ferredoxin-type subunit                                              | 0.81  |
| b2886 | ygfS | Isolate 2 | non-essential | predicted oxidoreductase, 4Fe-4S ferredoxin-type subunit                                              | -3.46 |
| b2887 | ygfT | Isolate 1 | non-essential | fused predicted oxidoreductase Fe-S subunit -!- nucleotide-binding subunit                            | -0.08 |
| b2887 | ygfT | Isolate 2 | non-essential | fused predicted oxidoreductase Fe-S subunit -!- nucleotide-binding subunit                            | -0.27 |
| b2888 | ygfU | Isolate 1 | non-essential | predicted transporter                                                                                 | 1.11  |
| b2888 | ygfU | Isolate 2 | non-essential | predicted transporter                                                                                 | 0.42  |
| b2889 | idi  | Isolate 1 | non-essential | isopentenyl diphosphate isomerase                                                                     | 4.53  |
| b2889 | idi  | Isolate 2 | non-essential | isopentenyl diphosphate isomerase                                                                     | 1.20  |
| b2890 | lysS | Isolate 1 | non-essential | lysine tRNA synthetase, constitutive                                                                  | -2.21 |
| b2890 | lysS | Isolate 2 | non-essential | lysine tRNA synthetase, constitutive                                                                  | 1.10  |
| b2891 | prfB | Isolate 1 | non-essential | peptide chain release factor RF-2                                                                     | -1.11 |

|       |      |           |               |                                                                                                     |       |
|-------|------|-----------|---------------|-----------------------------------------------------------------------------------------------------|-------|
| b2891 | prfB | Isolate 2 | non-essential | peptide chain release factor RF-2                                                                   | -2.56 |
| b2892 | recJ | Isolate 1 | non-essential | ssDNA exonuclease, 5' --> 3'-specific                                                               | 1.50  |
| b2892 | recJ | Isolate 2 | non-essential | ssDNA exonuclease, 5' --> 3'-specific                                                               | 0.41  |
| b2893 | dsbC | Isolate 1 | non-essential | protein disulfide isomerase II                                                                      | 0.13  |
| b2893 | dsbC | Isolate 2 | non-essential | protein disulfide isomerase II                                                                      | -0.24 |
| b2894 | xerD | Isolate 1 | non-essential | site-specific tyrosine recombinase                                                                  | -1.92 |
| b2894 | xerD | Isolate 2 | non-essential | site-specific tyrosine recombinase                                                                  | -5.94 |
| b2895 | fldB | Isolate 1 | non-essential | flavodoxin 2                                                                                        | 4.29  |
| b2895 | fldB | Isolate 2 | non-essential | flavodoxin 2                                                                                        | 0.57  |
| b2896 | ygfX | Isolate 1 | non-essential | predicted protein                                                                                   | 2.30  |
| b2896 | ygfX | Isolate 2 | non-essential | predicted protein                                                                                   | 0.35  |
| b2897 | ygfY | Isolate 1 | non-essential | conserved protein                                                                                   | 0.68  |
| b2897 | ygfY | Isolate 2 | non-essential | conserved protein                                                                                   | 2.61  |
| b2898 | ygfZ | Isolate 1 | non-essential | predicted folate-dependent regulatory protein                                                       | -0.84 |
| b2898 | ygfZ | Isolate 2 | non-essential | predicted folate-dependent regulatory protein                                                       | 0.44  |
| b2899 | yqfA | Isolate 1 | non-essential | predicted oxidoreductase, inner membrane subunit                                                    | -0.58 |
| b2899 | yqfA | Isolate 2 | non-essential | predicted oxidoreductase, inner membrane subunit                                                    | -0.47 |
| b2900 | yqfB | Isolate 1 | non-essential | conserved protein                                                                                   | -0.28 |
| b2900 | yqfB | Isolate 2 | non-essential | conserved protein                                                                                   | 0.34  |
| b2901 | bglA | Isolate 1 | non-essential | 6-phospho-beta-glucosidase A                                                                        | 0.73  |
| b2901 | bglA | Isolate 2 | non-essential | 6-phospho-beta-glucosidase A                                                                        | -0.31 |
| b2902 | ygfF | Isolate 1 | non-essential | predicted NAD(P)-binding oxidoreductase with NAD(P)-binding Rossmann-fold domain                    | -0.21 |
| b2902 | ygfF | Isolate 2 | non-essential | predicted NAD(P)-binding oxidoreductase with NAD(P)-binding Rossmann-fold domain                    | 0.19  |
| b2903 | gcvP | Isolate 1 | non-essential | glycine decarboxylase, PLP-dependent, subunit (protein P) of glycine cleavage complex               | 0.50  |
| b2903 | gcvP | Isolate 2 | non-essential | glycine decarboxylase, PLP-dependent, subunit (protein P) of glycine cleavage complex               | 1.29  |
| b2904 | gcvH | Isolate 1 | non-essential | glycine cleavage complex lipoylprotein                                                              | 0.15  |
| b2904 | gcvH | Isolate 2 | non-essential | glycine cleavage complex lipoylprotein                                                              | -0.85 |
| b2905 | gcvT | Isolate 1 | non-essential | aminomethyltransferase, tetrahydrofolate-dependent, subunit (T protein) of glycine cleavage complex | 0.04  |
| b2905 | gcvT | Isolate 2 | non-essential | aminomethyltransferase, tetrahydrofolate-dependent, subunit (T protein) of glycine cleavage complex | 1.15  |
| b2906 | visC | Isolate 1 | non-essential | predicted oxidoreductase, FAD/NAD(P)-binding domain                                                 | 0.63  |
| b2906 | visC | Isolate 2 | non-essential | predicted oxidoreductase, FAD/NAD(P)-binding domain                                                 | 2.04  |
| b2907 | ubiH | Isolate 1 | non-essential | 2-octaprenyl-6-methoxyphenol hydroxylase, FAD/NAD(P)-binding                                        | -1.50 |
| b2907 | ubiH | Isolate 2 | non-essential | 2-octaprenyl-6-methoxyphenol hydroxylase, FAD/NAD(P)-binding                                        | -1.95 |
| b2908 | pepP | Isolate 1 | non-essential | proline aminopeptidase P II                                                                         | 1.05  |
| b2908 | pepP | Isolate 2 | non-essential | proline aminopeptidase P II                                                                         | 2.23  |
| b2909 | ygfB | Isolate 1 | non-essential | predicted protein                                                                                   | 0.40  |
| b2909 | ygfB | Isolate 2 | non-essential | predicted protein                                                                                   | 0.46  |
| b2910 | zapA | Isolate 1 | non-essential | protein that localizes to the cytokinetic ring                                                      | -0.70 |
| b2910 | zapA | Isolate 2 | non-essential | protein that localizes to the cytokinetic ring                                                      | -0.78 |
| b2912 | ygfA | Isolate 1 | non-essential | predicted ligase                                                                                    | 0.12  |
| b2912 | ygfA | Isolate 2 | non-essential | predicted ligase                                                                                    | 0.36  |
| b2913 | serA | Isolate 1 | non-essential | D-3-phosphoglycerate dehydrogenase                                                                  | 1.06  |
| b2913 | serA | Isolate 2 | non-essential | D-3-phosphoglycerate dehydrogenase                                                                  | 2.28  |

|       |      |           |               |                                                                         |       |
|-------|------|-----------|---------------|-------------------------------------------------------------------------|-------|
| b2914 | rpiA | Isolate 1 | non-essential | ribosephosphate isomerase, constitutive                                 | -2.24 |
| b2914 | rpiA | Isolate 2 | non-essential | ribosephosphate isomerase, constitutive                                 | -2.28 |
| b2915 | yqfE | Isolate 1 | non-essential | conserved protein                                                       | 0.16  |
| b2915 | yqfE | Isolate 2 | non-essential | conserved protein                                                       | 1.22  |
| b2916 | argP | Isolate 1 | non-essential | DNA-binding transcriptional activator, replication initiation inhibitor | -0.35 |
| b2916 | argP | Isolate 2 | non-essential | DNA-binding transcriptional activator, replication initiation inhibitor | 2.65  |
| b2917 | yliK | Isolate 1 | non-essential | methylmalonyl-CoA mutase                                                | 0.52  |
| b2917 | yliK | Isolate 2 | non-essential | methylmalonyl-CoA mutase                                                | -0.74 |
| b2918 | argK | Isolate 1 | non-essential | membrane ATPase/protein kinase                                          | 0.65  |
| b2918 | argK | Isolate 2 | non-essential | membrane ATPase/protein kinase                                          | -1.24 |
| b2919 | ygfG | Isolate 1 | non-essential | methylmalonyl-CoA decarboxylase, biotin-independent                     | 0.14  |
| b2919 | ygfG | Isolate 2 | non-essential | methylmalonyl-CoA decarboxylase, biotin-independent                     | 0.32  |
| b2920 | ygfH | Isolate 1 | non-essential | propionyl-CoA:succinate-CoA transferase                                 | -0.75 |
| b2920 | ygfH | Isolate 2 | non-essential | propionyl-CoA:succinate-CoA transferase                                 | 0.19  |
| b2921 | ygfI | Isolate 1 | non-essential | predicted DNA-binding transcriptional regulator                         | -0.78 |
| b2921 | ygfI | Isolate 2 | non-essential | predicted DNA-binding transcriptional regulator                         | 0.61  |
| b2922 | yggE | Isolate 1 | non-essential | conserved protein                                                       | -1.07 |
| b2922 | yggE | Isolate 2 | non-essential | conserved protein                                                       | 0.65  |
| b2923 | argO | Isolate 1 | non-essential | arginine transporter                                                    | 1.09  |
| b2923 | argO | Isolate 2 | non-essential | arginine transporter                                                    | -1.68 |
| b2924 | mscS | Isolate 1 | non-essential | mechanosensitive channel                                                | 0.00  |
| b2924 | mscS | Isolate 2 | non-essential | mechanosensitive channel                                                | 0.95  |
| b2925 | fbaA | Isolate 1 | essential     | fructose-bisphosphate aldolase, class II                                | 1.33  |
| b2926 | pgk  | Isolate 1 | essential     | phosphoglycerate kinase                                                 | -0.46 |
| b2927 | epd  | Isolate 1 | non-essential | D-erythrose 4-phosphate dehydrogenase                                   | 1.07  |
| b2927 | epd  | Isolate 2 | non-essential | D-erythrose 4-phosphate dehydrogenase                                   | 2.72  |
| b2928 | yggC | Isolate 1 | non-essential | conserved protein with nucleoside triphosphate hydrolase domain         | -1.65 |
| b2928 | yggC | Isolate 2 | non-essential | conserved protein with nucleoside triphosphate hydrolase domain         | -1.42 |
| b2929 | yggD | Isolate 1 | non-essential | predicted DNA-binding transcriptional regulator                         | -0.66 |
| b2929 | yggD | Isolate 2 | non-essential | predicted DNA-binding transcriptional regulator                         | -1.03 |
| b2930 | yggF | Isolate 1 | non-essential | predicted hexoseP phosphatase                                           | -0.24 |
| b2930 | yggF | Isolate 2 | non-essential | predicted hexoseP phosphatase                                           | -3.25 |
| b2933 | cmtA | Isolate 1 | non-essential | predicted fused mannitol-specific enzyme IIBC component of PTS          | -0.28 |
| b2933 | cmtA | Isolate 2 | non-essential | predicted fused mannitol-specific enzyme IIBC component of PTS          | -1.97 |
| b2934 | cmtB | Isolate 1 | non-essential | predicted mannitol-specific enzyme IIA component of PTS                 | 0.86  |
| b2934 | cmtB | Isolate 2 | non-essential | predicted mannitol-specific enzyme IIA component of PTS                 | 1.76  |
| b2935 | tktA | Isolate 1 | non-essential | transketolase 1, thiamin-binding                                        | 0.29  |
| b2935 | tktA | Isolate 2 | non-essential | transketolase 1, thiamin-binding                                        | 0.33  |
| b2936 | yggG | Isolate 1 | non-essential | predicted peptidase                                                     | -3.10 |
| b2936 | yggG | Isolate 2 | non-essential | predicted peptidase                                                     | -2.07 |
| b2937 | speB | Isolate 1 | non-essential | agmatinase                                                              | -0.15 |
| b2937 | speB | Isolate 2 | non-essential | agmatinase                                                              | 0.17  |
| b2938 | speA | Isolate 1 | non-essential | biosynthetic arginine decarboxylase, PLP-binding                        | 0.79  |

|       |      |           |               |                                                  |       |
|-------|------|-----------|---------------|--------------------------------------------------|-------|
| b2938 | speA | Isolate 2 | non-essential | biosynthetic arginine decarboxylase, PLP-binding | -1.04 |
| b2939 | yqgB | Isolate 1 | non-essential | predicted protein                                | 0.16  |
| b2939 | yqgB | Isolate 2 | non-essential | predicted protein                                | 1.22  |
| b2940 | yqgC | Isolate 1 | non-essential | predicted protein                                | -3.52 |
| b2940 | yqgC | Isolate 2 | non-essential | predicted protein                                | 0.83  |
| b2942 | metK | Isolate 1 | essential     | methionine adenosyltransferase 1                 | -0.24 |
| b2943 | galP | Isolate 1 | non-essential | D-galactose transporter                          | 1.17  |
| b2943 | galP | Isolate 2 | non-essential | D-galactose transporter                          | -0.65 |
| b2944 | sprT | Isolate 1 | non-essential | conserved protein                                | -0.18 |
| b2944 | sprT | Isolate 2 | non-essential | conserved protein                                | 0.61  |
| b2945 | endA | Isolate 1 | non-essential | DNA-specific endonuclease I                      | -0.02 |
| b2945 | endA | Isolate 2 | non-essential | DNA-specific endonuclease I                      | 0.41  |
| b2946 | yggJ | Isolate 1 | non-essential | predicted protein                                | -0.13 |
| b2946 | yggJ | Isolate 2 | non-essential | predicted protein                                | -1.95 |
| b2947 | gshB | Isolate 1 | non-essential | glutathione synthetase                           | -0.03 |
| b2947 | gshB | Isolate 2 | non-essential | glutathione synthetase                           | -0.97 |
| b2948 | yqgE | Isolate 1 | non-essential | predicted protein                                | -1.37 |
| b2948 | yqgE | Isolate 2 | non-essential | predicted protein                                | -1.11 |
| b2949 | yqgF | Isolate 1 | essential     | predicted Holliday junction resolvase            | -0.41 |
| b2950 | yggR | Isolate 1 | non-essential | predicted transporter                            | 0.56  |
| b2950 | yggR | Isolate 2 | non-essential | predicted transporter                            | 1.57  |
| b2951 | yggS | Isolate 1 | non-essential | predicted enzyme                                 | -1.76 |
| b2951 | yggS | Isolate 2 | non-essential | predicted enzyme                                 | 0.28  |
| b2952 | yggT | Isolate 1 | non-essential | predicted inner membrane protein                 | 1.59  |
| b2952 | yggT | Isolate 2 | non-essential | predicted inner membrane protein                 | 2.29  |
| b2953 | yggU | Isolate 1 | non-essential | conserved protein                                | 1.54  |
| b2953 | yggU | Isolate 2 | non-essential | conserved protein                                | 1.73  |
| b2954 | yggV | Isolate 1 | non-essential | dITP/XTP pyrophosphatase                         | 0.17  |
| b2954 | yggV | Isolate 2 | non-essential | dITP/XTP pyrophosphatase                         | 0.27  |
| b2955 | yggW | Isolate 1 | non-essential | predicted oxidoreductase                         | -0.29 |
| b2955 | yggW | Isolate 2 | non-essential | predicted oxidoreductase                         | 1.08  |
| b2956 | yggM | Isolate 1 | non-essential | conserved protein                                | 0.25  |
| b2956 | yggM | Isolate 2 | non-essential | conserved protein                                | 1.03  |
| b2957 | ansB | Isolate 1 | non-essential | periplasmic L-asparaginase II                    | -1.07 |
| b2957 | ansB | Isolate 2 | non-essential | periplasmic L-asparaginase II                    | 1.04  |
| b2958 | yggN | Isolate 1 | non-essential | predicted protein                                | -0.49 |
| b2958 | yggN | Isolate 2 | non-essential | predicted protein                                | -0.27 |
| b2959 | yggL | Isolate 1 | non-essential | predicted protein                                | 0.22  |
| b2959 | yggL | Isolate 2 | non-essential | predicted protein                                | -0.45 |
| b2960 | yggH | Isolate 1 | non-essential | tRNA (m7G46) methyltransferase, SAM-dependent    | -0.73 |
| b2960 | yggH | Isolate 2 | non-essential | tRNA (m7G46) methyltransferase, SAM-dependent    | 0.24  |
| b2961 | mutY | Isolate 1 | non-essential | adenine DNA glycosylase                          | -0.66 |
| b2961 | mutY | Isolate 2 | non-essential | adenine DNA glycosylase                          | -1.35 |

|       |      |           |               |                                                                            |       |
|-------|------|-----------|---------------|----------------------------------------------------------------------------|-------|
| b2962 | yggX | Isolate 1 | non-essential | protein that protects iron-sulfur proteins against oxidative damage        | 0.57  |
| b2962 | yggX | Isolate 2 | non-essential | protein that protects iron-sulfur proteins against oxidative damage        | 0.42  |
| b2963 | mltC | Isolate 1 | non-essential | membrane-bound lytic murein transglycosylase C                             | -0.52 |
| b2963 | mltC | Isolate 2 | non-essential | membrane-bound lytic murein transglycosylase C                             | -0.10 |
| b2964 | nupG | Isolate 1 | non-essential | nucleoside transporter                                                     | 4.53  |
| b2964 | nupG | Isolate 2 | non-essential | nucleoside transporter                                                     | 1.63  |
| b2965 | speC | Isolate 1 | non-essential | ornithine decarboxylase, constitutive                                      | 0.93  |
| b2965 | speC | Isolate 2 | non-essential | ornithine decarboxylase, constitutive                                      | 1.24  |
| b2966 | yqgA | Isolate 1 | non-essential | predicted inner membrane protein                                           | 0.06  |
| b2966 | yqgA | Isolate 2 | non-essential | predicted inner membrane protein                                           | -1.18 |
| b2968 | yghD | Isolate 1 | non-essential | predicted secretion pathway M-type protein, membrane anchored              | -0.81 |
| b2968 | yghD | Isolate 2 | non-essential | predicted secretion pathway M-type protein, membrane anchored              | -3.73 |
| b2969 | yghE | Isolate 1 | *             | predicted secretion pathway protein, L-type protein (pseudogene)           | 0.94  |
| b2969 | yghE | Isolate 2 | *             | predicted secretion pathway protein, L-type protein (pseudogene)           | -0.44 |
| b2970 | yghF | Isolate 1 | non-essential | predicted secretion pathway protein, C-type protein                        | 0.13  |
| b2970 | yghF | Isolate 2 | non-essential | predicted secretion pathway protein, C-type protein                        | 0.48  |
| b2971 | yghG | Isolate 1 | non-essential | predicted protein                                                          | 1.45  |
| b2971 | yghG | Isolate 2 | non-essential | predicted protein                                                          | -2.27 |
| b2972 | pppA | Isolate 1 | non-essential | bifunctional prepilin leader peptidase -!- methylase                       | 0.60  |
| b2972 | pppA | Isolate 2 | non-essential | bifunctional prepilin leader peptidase -!- methylase                       | -0.32 |
| b2975 | yghK | Isolate 1 | non-essential | glycolate transporter                                                      | 0.06  |
| b2975 | yghK | Isolate 2 | non-essential | glycolate transporter                                                      | 0.88  |
| b2976 | glcB | Isolate 1 | non-essential | malate synthase G                                                          | 1.24  |
| b2976 | glcB | Isolate 2 | non-essential | malate synthase G                                                          | 0.72  |
| b2977 | glcG | Isolate 1 | non-essential | conserved protein                                                          | -1.83 |
| b2977 | glcG | Isolate 2 | non-essential | conserved protein                                                          | -1.39 |
| b2979 | glcD | Isolate 1 | non-essential | glycolate oxidase subunit, FAD-linked                                      | -0.20 |
| b2979 | glcD | Isolate 2 | non-essential | glycolate oxidase subunit, FAD-linked                                      | 1.36  |
| b2980 | glcC | Isolate 1 | non-essential | DNA-binding transcriptional dual regulator, glycolate-binding              | 0.32  |
| b2980 | glcC | Isolate 2 | non-essential | DNA-binding transcriptional dual regulator, glycolate-binding              | -1.50 |
| b2981 | yghO | Isolate 1 | non-essential | predicted DNA-binding transcriptional regulator                            | 0.73  |
| b2981 | yghO | Isolate 2 | non-essential | predicted DNA-binding transcriptional regulator                            | 0.40  |
| b2983 | yghQ | Isolate 1 | non-essential | predicted inner membrane protein                                           | 0.31  |
| b2983 | yghQ | Isolate 2 | non-essential | predicted inner membrane protein                                           | 0.29  |
| b2984 | yghR | Isolate 1 | non-essential | predicted protein with nucleoside triphosphate hydrolase domain            | -0.03 |
| b2984 | yghR | Isolate 2 | non-essential | predicted protein with nucleoside triphosphate hydrolase domain            | -1.53 |
| b2985 | yghS | Isolate 1 | non-essential | predicted protein with nucleoside triphosphate hydrolase domain            | 1.30  |
| b2985 | yghS | Isolate 2 | non-essential | predicted protein with nucleoside triphosphate hydrolase domain            | 1.70  |
| b2986 | yghT | Isolate 1 | non-essential | predicted protein with nucleoside triphosphate hydrolase domain            | -0.31 |
| b2986 | yghT | Isolate 2 | non-essential | predicted protein with nucleoside triphosphate hydrolase domain            | 0.63  |
| b2987 | pitB | Isolate 1 | non-essential | phosphate transporter                                                      | 1.07  |
| b2987 | pitB | Isolate 2 | non-essential | phosphate transporter                                                      | 0.03  |
| b2988 | gss  | Isolate 1 | non-essential | fused glutathionylspermidine amidase -!- glutathionylspermidine synthetase | -1.95 |

|       |      |           |               |                                                                                     |       |
|-------|------|-----------|---------------|-------------------------------------------------------------------------------------|-------|
| b2988 | gss  | Isolate 2 | non-essential | fused glutathionylspermidine amidase -/- glutathionylspermidine synthetase          | -0.84 |
| b2989 | yghU | Isolate 1 | non-essential | predicted S-transferase                                                             | 1.58  |
| b2989 | yghU | Isolate 2 | non-essential | predicted S-transferase                                                             | 0.18  |
| b2990 | hybG | Isolate 1 | non-essential | hydrogenase 2 accessory protein                                                     | 1.50  |
| b2990 | hybG | Isolate 2 | non-essential | hydrogenase 2 accessory protein                                                     | -0.81 |
| b2991 | hybF | Isolate 1 | non-essential | protein involved with the maturation of hydrogenases 1 and 2                        | 0.89  |
| b2991 | hybF | Isolate 2 | non-essential | protein involved with the maturation of hydrogenases 1 and 2                        | -1.35 |
| b2992 | hybE | Isolate 1 | non-essential | hydrogenase 2-specific chaperone                                                    | -1.50 |
| b2992 | hybE | Isolate 2 | non-essential | hydrogenase 2-specific chaperone                                                    | -0.94 |
| b2993 | hybD | Isolate 1 | non-essential | predicted maturation element for hydrogenase 2                                      | -1.23 |
| b2993 | hybD | Isolate 2 | non-essential | predicted maturation element for hydrogenase 2                                      | 0.62  |
| b2994 | hybC | Isolate 1 | non-essential | hydrogenase 2, large subunit                                                        | -0.84 |
| b2994 | hybC | Isolate 2 | non-essential | hydrogenase 2, large subunit                                                        | -1.29 |
| b2995 | hybB | Isolate 1 | non-essential | predicted hydrogenase 2 cytochrome b type component                                 | 1.02  |
| b2995 | hybB | Isolate 2 | non-essential | predicted hydrogenase 2 cytochrome b type component                                 | -0.81 |
| b2996 | hybA | Isolate 1 | non-essential | hydrogenase 2 4Fe-4S ferredoxin-type component                                      | -1.60 |
| b2996 | hybA | Isolate 2 | non-essential | hydrogenase 2 4Fe-4S ferredoxin-type component                                      | -1.81 |
| b2997 | hybO | Isolate 1 | non-essential | hydrogenase 2, small subunit                                                        | 2.53  |
| b2997 | hybO | Isolate 2 | non-essential | hydrogenase 2, small subunit                                                        | 0.40  |
| b2998 | yghW | Isolate 1 | non-essential | predicted protein                                                                   | -0.59 |
| b2998 | yghW | Isolate 2 | non-essential | predicted protein                                                                   | 0.72  |
| b2999 | yghX | Isolate 1 | *             | predicted hydrolase (pseudogene)                                                    | 0.58  |
| b2999 | yghX | Isolate 2 | *             | predicted hydrolase (pseudogene)                                                    | 2.14  |
| b3000 | yghY | Isolate 1 | *             | predicted dienlactone hydrolase (pseudogene)                                        | 2.88  |
| b3000 | yghY | Isolate 2 | *             | predicted dienlactone hydrolase (pseudogene)                                        | 2.06  |
| b3001 | yghZ | Isolate 1 | non-essential | aldo-keto reductase                                                                 | -0.82 |
| b3001 | yghZ | Isolate 2 | non-essential | aldo-keto reductase                                                                 | 0.28  |
| b3002 | yqhA | Isolate 1 | non-essential | conserved inner membrane protein                                                    | 5.82  |
| b3002 | yqhA | Isolate 2 | non-essential | conserved inner membrane protein                                                    | 0.86  |
| b3003 | yghA | Isolate 1 | non-essential | predicted glutathionylspermidine synthase, with NAD(P)-binding Rossmann-fold domain | 0.17  |
| b3003 | yghA | Isolate 2 | non-essential | predicted glutathionylspermidine synthase, with NAD(P)-binding Rossmann-fold domain | -0.23 |
| b3005 | exbD | Isolate 1 | non-essential | membrane spanning protein in TonB-ExbB-ExbD complex                                 | 0.35  |
| b3005 | exbD | Isolate 2 | non-essential | membrane spanning protein in TonB-ExbB-ExbD complex                                 | -0.45 |
| b3006 | exbB | Isolate 1 | non-essential | membrane spanning protein in TonB-ExbB-ExbD complex                                 | -0.36 |
| b3006 | exbB | Isolate 2 | non-essential | membrane spanning protein in TonB-ExbB-ExbD complex                                 | 5.13  |
| b3008 | metC | Isolate 1 | non-essential | cystathionine beta-lyase, PLP-dependent                                             | 2.99  |
| b3008 | metC | Isolate 2 | non-essential | cystathionine beta-lyase, PLP-dependent                                             | 2.20  |
| b3009 | yghB | Isolate 1 | non-essential | conserved inner membrane protein                                                    | 1.17  |
| b3009 | yghB | Isolate 2 | non-essential | conserved inner membrane protein                                                    | -0.75 |
| b3010 | yqhC | Isolate 1 | non-essential | predicted DNA-binding transcriptional regulator                                     | -7.04 |
| b3010 | yqhC | Isolate 2 | non-essential | predicted DNA-binding transcriptional regulator                                     | 0.53  |
| b3011 | yqhD | Isolate 1 | non-essential | alcohol dehydrogenase, NAD(P)-dependent                                             | -3.98 |
| b3011 | yqhD | Isolate 2 | non-essential | alcohol dehydrogenase, NAD(P)-dependent                                             | -0.47 |

|       |      |           |               |                                                                                    |       |
|-------|------|-----------|---------------|------------------------------------------------------------------------------------|-------|
| b3012 | dkgA | Isolate 1 | non-essential | 2,5-diketo-D-gluconate reductase A                                                 | -1.33 |
| b3012 | dkgA | Isolate 2 | non-essential | 2,5-diketo-D-gluconate reductase A                                                 | 0.93  |
| b3013 | yqhG | Isolate 1 | non-essential | conserved protein                                                                  | 1.26  |
| b3013 | yqhG | Isolate 2 | non-essential | conserved protein                                                                  | -0.07 |
| b3014 | yqhH | Isolate 1 | non-essential | predicted outer membrane lipoprotein                                               | 0.31  |
| b3014 | yqhH | Isolate 2 | non-essential | predicted outer membrane lipoprotein                                               | -1.83 |
| b3017 | sufI | Isolate 1 | non-essential | repressor protein for FtsI                                                         | -0.25 |
| b3017 | sufI | Isolate 2 | non-essential | repressor protein for FtsI                                                         | -1.67 |
| b3018 | plsC | Isolate 1 | essential     | 1-acyl-sn-glycerol-3-phosphate acyltransferase                                     | -0.39 |
| b3019 | parC | Isolate 1 | non-essential | DNA topoisomerase IV, subunit A                                                    | -1.72 |
| b3019 | parC | Isolate 2 | non-essential | DNA topoisomerase IV, subunit A                                                    | -0.73 |
| b3020 | ygiS | Isolate 1 | non-essential | predicted transporter subunit -!- periplasmic-binding component of ABC superfamily | -0.37 |
| b3020 | ygiS | Isolate 2 | non-essential | predicted transporter subunit -!- periplasmic-binding component of ABC superfamily | 0.80  |
| b3021 | ygiT | Isolate 1 | essential     | predicted DNA-binding transcriptional regulator                                    | -0.46 |
| b3022 | ygiU | Isolate 1 | non-essential | predicted cyanide hydratase                                                        | 1.19  |
| b3022 | ygiU | Isolate 2 | non-essential | predicted cyanide hydratase                                                        | 3.34  |
| b3023 | ygiV | Isolate 1 | non-essential | predicted transcriptional regulator                                                | -1.47 |
| b3023 | ygiV | Isolate 2 | non-essential | predicted transcriptional regulator                                                | -1.03 |
| b3024 | ygiW | Isolate 1 | non-essential | conserved protein                                                                  | -0.88 |
| b3024 | ygiW | Isolate 2 | non-essential | conserved protein                                                                  | -0.56 |
| b3025 | qseB | Isolate 1 | non-essential | DNA-binding response regulator in two-component regulatory system with QseC        | -1.49 |
| b3025 | qseB | Isolate 2 | non-essential | DNA-binding response regulator in two-component regulatory system with QseC        | -1.30 |
| b3026 | qseC | Isolate 1 | non-essential | sensory histidine kinase in two-component regulatory system with QseB              | -0.03 |
| b3026 | qseC | Isolate 2 | non-essential | sensory histidine kinase in two-component regulatory system with QseB              | 0.40  |
| b3027 | ygiZ | Isolate 1 | non-essential | conserved inner membrane protein                                                   | -0.53 |
| b3027 | ygiZ | Isolate 2 | non-essential | conserved inner membrane protein                                                   | -0.95 |
| b3028 | mdaB | Isolate 1 | non-essential | NADPH quinone reductase                                                            | 1.47  |
| b3028 | mdaB | Isolate 2 | non-essential | NADPH quinone reductase                                                            | 0.89  |
| b3029 | ygiN | Isolate 1 | non-essential | quinol monooxygenase                                                               | -0.96 |
| b3029 | ygiN | Isolate 2 | non-essential | quinol monooxygenase                                                               | -0.26 |
| b3030 | parE | Isolate 1 | essential     | DNA topoisomerase IV, subunit B                                                    | 0.65  |
| b3031 | yqiA | Isolate 1 | non-essential | predicted esterase                                                                 | -0.26 |
| b3031 | yqiA | Isolate 2 | non-essential | predicted esterase                                                                 | -1.18 |
| b3032 | cpdA | Isolate 1 | non-essential | cyclic 3',5'-adenosine monophosphate phosphodiesterase                             | 0.50  |
| b3032 | cpdA | Isolate 2 | non-essential | cyclic 3',5'-adenosine monophosphate phosphodiesterase                             | -1.07 |
| b3033 | yqiB | Isolate 1 | non-essential | predicted dehydrogenase                                                            | -0.22 |
| b3033 | yqiB | Isolate 2 | non-essential | predicted dehydrogenase                                                            | -0.87 |
| b3034 | nudF | Isolate 1 | non-essential | ADP-ribose pyrophosphatase                                                         | 1.04  |
| b3034 | nudF | Isolate 2 | non-essential | ADP-ribose pyrophosphatase                                                         | 0.01  |
| b3035 | tolC | Isolate 1 | non-essential | transport channel                                                                  | 1.08  |
| b3035 | tolC | Isolate 2 | non-essential | transport channel                                                                  | 5.17  |
| b3037 | ygiB | Isolate 1 | non-essential | conserved outer membrane protein                                                   | 1.95  |
| b3037 | ygiB | Isolate 2 | non-essential | conserved outer membrane protein                                                   | 1.70  |

|       |      |           |               |                                                                                                 |       |
|-------|------|-----------|---------------|-------------------------------------------------------------------------------------------------|-------|
| b3038 | ygiC | Isolate 1 | non-essential | predicted enzyme                                                                                | 0.28  |
| b3038 | ygiC | Isolate 2 | non-essential | predicted enzyme                                                                                | -0.68 |
| b3039 | zupT | Isolate 1 | non-essential | predicted dioxygenase                                                                           | 0.00  |
| b3039 | zupT | Isolate 2 | non-essential | predicted dioxygenase                                                                           | 1.43  |
| b3041 | ribB | Isolate 1 | essential     | 3,4 dihydroxy-2-butanone-4-phosphate synthase                                                   | 0.37  |
| b3042 | yqiC | Isolate 1 | non-essential | conserved protein                                                                               | 1.11  |
| b3042 | yqiC | Isolate 2 | non-essential | conserved protein                                                                               | 0.35  |
| b3043 | ygiL | Isolate 1 | non-essential | predicted fimbrial-like adhesin protein                                                         | 0.61  |
| b3043 | ygiL | Isolate 2 | non-essential | predicted fimbrial-like adhesin protein                                                         | 0.35  |
| b3046 | yqiG | Isolate 1 | non-essential | predicted outer membrane usher protein                                                          | -0.22 |
| b3046 | yqiG | Isolate 2 | non-essential | predicted outer membrane usher protein                                                          | 0.19  |
| b3047 | yqiH | Isolate 1 | non-essential | predicted periplasmic pilin chaperone                                                           | -0.97 |
| b3047 | yqiH | Isolate 2 | non-essential | predicted periplasmic pilin chaperone                                                           | 0.37  |
| b3048 | yqiI | Isolate 1 | non-essential | conserved protein                                                                               | -1.28 |
| b3048 | yqiI | Isolate 2 | non-essential | conserved protein                                                                               | 0.58  |
| b3049 | glgS | Isolate 1 | non-essential | predicted glycogen synthesis protein                                                            | -0.16 |
| b3049 | glgS | Isolate 2 | non-essential | predicted glycogen synthesis protein                                                            | -2.41 |
| b3050 | yqiJ | Isolate 1 | non-essential | predicted inner membrane protein                                                                | 0.67  |
| b3050 | yqiJ | Isolate 2 | non-essential | predicted inner membrane protein                                                                | 0.54  |
| b3051 | yqiK | Isolate 1 | non-essential | conserved protein                                                                               | 0.98  |
| b3051 | yqiK | Isolate 2 | non-essential | conserved protein                                                                               | 0.47  |
| b3052 | rfaE | Isolate 1 | non-essential | fused heptose 7-phosphate kinase -!- heptose 1-phosphate adenylyltransferase                    | -1.26 |
| b3052 | rfaE | Isolate 2 | non-essential | fused heptose 7-phosphate kinase -!- heptose 1-phosphate adenylyltransferase                    | -3.27 |
| b3053 | glnE | Isolate 1 | non-essential | fused deadenylyltransferase -!- adenylyltransferase for glutamine synthetase                    | 1.01  |
| b3053 | glnE | Isolate 2 | non-essential | fused deadenylyltransferase -!- adenylyltransferase for glutamine synthetase                    | 1.22  |
| b3054 | ygiF | Isolate 1 | non-essential | predicted adenylate cyclase                                                                     | 0.63  |
| b3054 | ygiF | Isolate 2 | non-essential | predicted adenylate cyclase                                                                     | 0.39  |
| b3055 | htrG | Isolate 1 | non-essential | predicted signal transduction protein (SH3 domain)                                              | 1.59  |
| b3055 | htrG | Isolate 2 | non-essential | predicted signal transduction protein (SH3 domain)                                              | 0.94  |
| b3056 | cca  | Isolate 1 | essential     | fused tRNA nucleotidyl transferase -!- 2'3'-cyclic phosphodiesterase/2'nucleotidase/phosphatase | -1.98 |
| b3057 | bacA | Isolate 1 | non-essential | undecaprenyl pyrophosphate phosphatase                                                          | -0.10 |
| b3057 | bacA | Isolate 2 | non-essential | undecaprenyl pyrophosphate phosphatase                                                          | -1.28 |
| b3058 | folB | Isolate 1 | non-essential | bifunctional dihydroneopterin aldolase -!- dihydroneopterin triphosphate 2'-epimerase           | 2.10  |
| b3058 | folB | Isolate 2 | non-essential | bifunctional dihydroneopterin aldolase -!- dihydroneopterin triphosphate 2'-epimerase           | 0.19  |
| b3059 | ygiH | Isolate 1 | non-essential | conserved inner membrane protein                                                                | -0.07 |
| b3059 | ygiH | Isolate 2 | non-essential | conserved inner membrane protein                                                                | -0.55 |
| b3060 | ygiP | Isolate 1 | non-essential | predicted DNA-binding transcriptional regulator                                                 | 0.01  |
| b3060 | ygiP | Isolate 2 | non-essential | predicted DNA-binding transcriptional regulator                                                 | 0.58  |
| b3061 | ttdA | Isolate 1 | non-essential | L-tartrate dehydratase, alpha subunit                                                           | 0.03  |
| b3061 | ttdA | Isolate 2 | non-essential | L-tartrate dehydratase, alpha subunit                                                           | -0.44 |
| b3062 | ttdB | Isolate 1 | non-essential | L-tartrate dehydratase, beta subunit                                                            | -1.00 |
| b3062 | ttdB | Isolate 2 | non-essential | L-tartrate dehydratase, beta subunit                                                            | -0.06 |
| b3063 | ygjE | Isolate 1 | non-essential | predicted tartrate:succinate antiporter                                                         | -1.65 |



|       |      |           |               |                                                                                                   |       |
|-------|------|-----------|---------------|---------------------------------------------------------------------------------------------------|-------|
| b3063 | ygjE | Isolate 2 | non-essential | predicted tartrate:succinate antiporter                                                           | 0.46  |
| b3064 | ygjD | Isolate 1 | essential     | predicted peptidase                                                                               | -0.50 |
| b3065 | rpsU | Isolate 1 | non-essential | 30S ribosomal subunit protein S21                                                                 | 1.58  |
| b3065 | rpsU | Isolate 2 | non-essential | 30S ribosomal subunit protein S21                                                                 | -4.23 |
| b3066 | dnaG | Isolate 1 | non-essential | DNA primase                                                                                       | -1.80 |
| b3066 | dnaG | Isolate 2 | non-essential | DNA primase                                                                                       | -1.17 |
| b3067 | rpoD | Isolate 1 | non-essential | RNA polymerase, sigma 70 (sigma D) factor                                                         | -0.98 |
| b3067 | rpoD | Isolate 2 | non-essential | RNA polymerase, sigma 70 (sigma D) factor                                                         | -2.25 |
| b3068 | ygjF | Isolate 1 | non-essential | G/U mismatch-specific DNA glycosylase                                                             | -0.22 |
| b3068 | ygjF | Isolate 2 | non-essential | G/U mismatch-specific DNA glycosylase                                                             | -1.21 |
| b3070 | yqjH | Isolate 1 | non-essential | predicted siderophore interacting protein                                                         | 3.41  |
| b3070 | yqjH | Isolate 2 | non-essential | predicted siderophore interacting protein                                                         | 1.12  |
| b3071 | yqjI | Isolate 1 | non-essential | predicted transcriptional regulator                                                               | -0.49 |
| b3071 | yqjI | Isolate 2 | non-essential | predicted transcriptional regulator                                                               | -0.94 |
| b3072 | aer  | Isolate 1 | non-essential | fused signal transducer for aerotaxis sensory component -!- methyl accepting chemotaxis component | -0.15 |
| b3072 | aer  | Isolate 2 | non-essential | fused signal transducer for aerotaxis sensory component -!- methyl accepting chemotaxis component | -0.97 |
| b3073 | ygjG | Isolate 1 | non-essential | putrescine:2-oxoglutaric acid aminotransferase, PLP-dependent                                     | -0.09 |
| b3073 | ygjG | Isolate 2 | non-essential | putrescine:2-oxoglutaric acid aminotransferase, PLP-dependent                                     | 0.89  |
| b3074 | ygjH | Isolate 1 | non-essential | conserved protein                                                                                 | 1.70  |
| b3074 | ygjH | Isolate 2 | non-essential | conserved protein                                                                                 | 1.69  |
| b3075 | ebgR | Isolate 1 | non-essential | DNA-binding transcriptional repressor                                                             | -0.59 |
| b3075 | ebgR | Isolate 2 | non-essential | DNA-binding transcriptional repressor                                                             | 0.79  |
| b3076 | ebgA | Isolate 1 | non-essential | cryptic beta-D-galactosidase, alpha subunit                                                       | 1.05  |
| b3076 | ebgA | Isolate 2 | non-essential | cryptic beta-D-galactosidase, alpha subunit                                                       | 1.43  |
| b3077 | ebgC | Isolate 1 | non-essential | cryptic beta-D-galactosidase, beta subunit                                                        | -0.58 |
| b3077 | ebgC | Isolate 2 | non-essential | cryptic beta-D-galactosidase, beta subunit                                                        | 1.82  |
| b3078 | ygjI | Isolate 1 | non-essential | predicted transporter                                                                             | 1.71  |
| b3078 | ygjI | Isolate 2 | non-essential | predicted transporter                                                                             | 0.93  |
| b3079 | ygjJ | Isolate 1 | non-essential | conserved protein                                                                                 | 0.92  |
| b3079 | ygjJ | Isolate 2 | non-essential | conserved protein                                                                                 | -0.03 |
| b3080 | ygjK | Isolate 1 | non-essential | predicted glycosyl hydrolase                                                                      | 1.14  |
| b3080 | ygjK | Isolate 2 | non-essential | predicted glycosyl hydrolase                                                                      | -0.65 |
| b3081 | fadH | Isolate 1 | non-essential | 2,4-dienoyl-CoA reductase, NADH and FMN-linked                                                    | -1.19 |
| b3081 | fadH | Isolate 2 | non-essential | 2,4-dienoyl-CoA reductase, NADH and FMN-linked                                                    | 1.67  |
| b3082 | ygjM | Isolate 1 | non-essential | predicted DNA-binding transcriptional regulator                                                   | -1.79 |
| b3082 | ygjM | Isolate 2 | non-essential | predicted DNA-binding transcriptional regulator                                                   | -1.08 |
| b3083 | ygjN | Isolate 1 | non-essential | conserved protein                                                                                 | 1.01  |
| b3083 | ygjN | Isolate 2 | non-essential | conserved protein                                                                                 | 0.80  |
| b3084 | ygjO | Isolate 1 | non-essential | predicted methyltransferase small domain                                                          | 1.05  |
| b3084 | ygjO | Isolate 2 | non-essential | predicted methyltransferase small domain                                                          | 0.31  |
| b3085 | ygjP | Isolate 1 | non-essential | predicted metal dependent hydrolase                                                               | 0.88  |
| b3085 | ygjP | Isolate 2 | non-essential | predicted metal dependent hydrolase                                                               | -0.32 |
| b3086 | ygjQ | Isolate 1 | non-essential | predicted thioredoxin-like                                                                        | 1.12  |

|       |      |           |               |                                                    |       |
|-------|------|-----------|---------------|----------------------------------------------------|-------|
| b3086 | ygjQ | Isolate 2 | non-essential | predicted thioredoxin-like                         | -0.46 |
| b3087 | ygjR | Isolate 1 | non-essential | predicted NAD(P)-binding dehydrogenase             | -0.08 |
| b3087 | ygjR | Isolate 2 | non-essential | predicted NAD(P)-binding dehydrogenase             | -0.06 |
| b3088 | alx  | Isolate 1 | non-essential | predicted inner membrane protein, part of terminus | -1.64 |
| b3088 | alx  | Isolate 2 | non-essential | predicted inner membrane protein, part of terminus | -2.01 |
| b3089 | sstT | Isolate 1 | non-essential | sodium:serine/threonine symporter                  | 0.05  |
| b3089 | sstT | Isolate 2 | non-essential | sodium:serine/threonine symporter                  | 1.35  |
| b3090 | ygjV | Isolate 1 | non-essential | conserved inner membrane protein                   | 1.83  |
| b3090 | ygjV | Isolate 2 | non-essential | conserved inner membrane protein                   | -1.78 |
| b3091 | uxaA | Isolate 1 | non-essential | altronate hydrolase                                | -2.12 |
| b3091 | uxaA | Isolate 2 | non-essential | altronate hydrolase                                | -0.42 |
| b3092 | uxaC | Isolate 1 | non-essential | uronate isomerase                                  | -1.21 |
| b3092 | uxaC | Isolate 2 | non-essential | uronate isomerase                                  | -1.59 |
| b3093 | exuT | Isolate 1 | non-essential | hexuronate transporter                             | -0.08 |
| b3093 | exuT | Isolate 2 | non-essential | hexuronate transporter                             | 0.70  |
| b3094 | exuR | Isolate 1 | non-essential | DNA-binding transcriptional repressor              | 3.06  |
| b3094 | exuR | Isolate 2 | non-essential | DNA-binding transcriptional repressor              | 3.67  |
| b3095 | yqjA | Isolate 1 | non-essential | conserved inner membrane protein                   | 0.43  |
| b3095 | yqjA | Isolate 2 | non-essential | conserved inner membrane protein                   | 0.46  |
| b3096 | yqjB | Isolate 1 | non-essential | conserved protein                                  | 1.18  |
| b3096 | yqjB | Isolate 2 | non-essential | conserved protein                                  | 0.33  |
| b3097 | yqjC | Isolate 1 | non-essential | conserved protein                                  | 2.77  |
| b3097 | yqjC | Isolate 2 | non-essential | conserved protein                                  | 1.42  |
| b3098 | yqjD | Isolate 1 | non-essential | conserved protein                                  | -0.08 |
| b3098 | yqjD | Isolate 2 | non-essential | conserved protein                                  | 1.05  |
| b3099 | yqjE | Isolate 1 | non-essential | conserved inner membrane protein                   | 1.13  |
| b3099 | yqjE | Isolate 2 | non-essential | conserved inner membrane protein                   | 1.36  |
| b3100 | yqjK | Isolate 1 | non-essential | conserved protein                                  | -2.13 |
| b3100 | yqjK | Isolate 2 | non-essential | conserved protein                                  | -0.37 |
| b3101 | yqjF | Isolate 1 | non-essential | predicted quinol oxidase subunit                   | -0.33 |
| b3101 | yqjF | Isolate 2 | non-essential | predicted quinol oxidase subunit                   | -3.20 |
| b3102 | yqjG | Isolate 1 | non-essential | predicted S-transferase                            | 1.04  |
| b3102 | yqjG | Isolate 2 | non-essential | predicted S-transferase                            | -1.33 |
| b3103 | yhaH | Isolate 1 | non-essential | predicted inner membrane protein                   | 1.17  |
| b3103 | yhaH | Isolate 2 | non-essential | predicted inner membrane protein                   | 0.23  |
| b3104 | yhaI | Isolate 1 | non-essential | predicted inner membrane protein                   | 1.13  |
| b3104 | yhaI | Isolate 2 | non-essential | predicted inner membrane protein                   | 0.42  |
| b3105 | yhaJ | Isolate 1 | non-essential | predicted DNA-binding transcriptional regulator    | -1.14 |
| b3105 | yhaJ | Isolate 2 | non-essential | predicted DNA-binding transcriptional regulator    | 1.30  |
| b3106 | yhaK | Isolate 1 | non-essential | predicted pirin-related protein                    | -1.46 |
| b3106 | yhaK | Isolate 2 | non-essential | predicted pirin-related protein                    | 0.92  |
| b3107 | yhaL | Isolate 1 | non-essential | predicted protein                                  | -0.87 |
| b3107 | yhaL | Isolate 2 | non-essential | predicted protein                                  | -1.20 |

|       |      |           |               |                                                                                   |       |
|-------|------|-----------|---------------|-----------------------------------------------------------------------------------|-------|
| b3110 | yhaO | Isolate 1 | non-essential | predicted transporter                                                             | -0.57 |
| b3110 | yhaO | Isolate 2 | non-essential | predicted transporter                                                             | 1.79  |
| b3114 | tdcE | Isolate 1 | non-essential | pyruvate formate-lyase 4/2-ketobutyrate formate-lyase                             | -2.64 |
| b3114 | tdcE | Isolate 2 | non-essential | pyruvate formate-lyase 4/2-ketobutyrate formate-lyase                             | -0.36 |
| b3115 | tdcD | Isolate 1 | non-essential | propionate kinase/acetate kinase C, anaerobic                                     | 2.18  |
| b3115 | tdcD | Isolate 2 | non-essential | propionate kinase/acetate kinase C, anaerobic                                     | 3.14  |
| b3116 | tdcC | Isolate 1 | non-essential | L-threonine/L-serine transporter                                                  | 0.10  |
| b3116 | tdcC | Isolate 2 | non-essential | L-threonine/L-serine transporter                                                  | 0.36  |
| b3117 | tdcB | Isolate 1 | non-essential | catabolic threonine dehydratase, PLP-dependent                                    | -0.01 |
| b3117 | tdcB | Isolate 2 | non-essential | catabolic threonine dehydratase, PLP-dependent                                    | 3.73  |
| b3118 | tdcA | Isolate 1 | non-essential | DNA-binding transcriptional activator                                             | 0.19  |
| b3118 | tdcA | Isolate 2 | non-essential | DNA-binding transcriptional activator                                             | 0.84  |
| b3119 | tdcR | Isolate 1 | non-essential | DNA-binding transcriptional activator                                             | -1.99 |
| b3119 | tdcR | Isolate 2 | non-essential | DNA-binding transcriptional activator                                             | 0.91  |
| b3120 | yhaB | Isolate 1 | non-essential | predicted protein                                                                 | -1.13 |
| b3120 | yhaB | Isolate 2 | non-essential | predicted protein                                                                 | -0.70 |
| b3121 | yhaC | Isolate 1 | non-essential | predicted protein                                                                 | -1.70 |
| b3121 | yhaC | Isolate 2 | non-essential | predicted protein                                                                 | -0.85 |
| b3124 | garK | Isolate 1 | non-essential | glycerate kinase I                                                                | 1.06  |
| b3124 | garK | Isolate 2 | non-essential | glycerate kinase I                                                                | -0.22 |
| b3125 | garR | Isolate 1 | non-essential | tartronate semialdehyde reductase                                                 | -0.63 |
| b3125 | garR | Isolate 2 | non-essential | tartronate semialdehyde reductase                                                 | 2.41  |
| b3126 | garL | Isolate 1 | non-essential | alpha-dehydro-beta-deoxy-D-glucarate aldolase                                     | 0.91  |
| b3126 | garL | Isolate 2 | non-essential | alpha-dehydro-beta-deoxy-D-glucarate aldolase                                     | 1.60  |
| b3127 | garP | Isolate 1 | non-essential | predicted (D)-galactarate transporter                                             | 1.32  |
| b3127 | garP | Isolate 2 | non-essential | predicted (D)-galactarate transporter                                             | 0.19  |
| b3128 | garD | Isolate 1 | non-essential | (D)-galactarate dehydrogenase                                                     | 0.24  |
| b3128 | garD | Isolate 2 | non-essential | (D)-galactarate dehydrogenase                                                     | 0.57  |
| b3129 | sohA | Isolate 1 | non-essential | predicted regulator                                                               | -1.67 |
| b3129 | sohA | Isolate 2 | non-essential | predicted regulator                                                               | -2.37 |
| b3130 | yhaV | Isolate 1 | non-essential | conserved protein                                                                 | 0.89  |
| b3130 | yhaV | Isolate 2 | non-essential | conserved protein                                                                 | 0.52  |
| b3131 | agaR | Isolate 1 | non-essential | DNA-binding transcriptional dual regulator                                        | -1.38 |
| b3131 | agaR | Isolate 2 | non-essential | DNA-binding transcriptional dual regulator                                        | -0.23 |
| b3132 | kbaZ | Isolate 1 | non-essential | tagatose 6-phosphate aldolase 1, kbaZ subunit                                     | -1.10 |
| b3132 | kbaZ | Isolate 2 | non-essential | tagatose 6-phosphate aldolase 1, kbaZ subunit                                     | 0.19  |
| b3133 | agaV | Isolate 1 | non-essential | N-acetylgalactosamine-specific enzyme IIB component of PTS                        | 0.21  |
| b3133 | agaV | Isolate 2 | non-essential | N-acetylgalactosamine-specific enzyme IIB component of PTS                        | 1.54  |
| b3134 | agaW | Isolate 1 | *             | N-acetylgalactosamine-specific enzyme IIC component of PTS, fragment (pseudogene) | 0.65  |
| b3134 | agaW | Isolate 2 | *             | N-acetylgalactosamine-specific enzyme IIC component of PTS, fragment (pseudogene) | -1.06 |
| b3135 | agaA | Isolate 1 | non-essential | predicted truncated N-acetylgalactosamine-6-phosphate deacetylase                 | 2.14  |
| b3135 | agaA | Isolate 2 | non-essential | predicted truncated N-acetylgalactosamine-6-phosphate deacetylase                 | 0.15  |
| b3136 | agaS | Isolate 1 | non-essential | tagatose-6-phosphate ketose/aldose isomerase                                      | -1.67 |

|       |      |           |               |                                                                  |       |
|-------|------|-----------|---------------|------------------------------------------------------------------|-------|
| b3136 | agaS | Isolate 2 | non-essential | tagatose-6-phosphate ketose/aldose isomerase                     | 0.51  |
| b3137 | kbaY | Isolate 1 | non-essential | tagatose 6-phosphate aldolase 1, kbaY subunit                    | 0.94  |
| b3137 | kbaY | Isolate 2 | non-essential | tagatose 6-phosphate aldolase 1, kbaY subunit                    | -1.73 |
| b3138 | agaB | Isolate 1 | non-essential | N-acetylgalactosamine-specific enzyme IIB component of PTS       | 0.31  |
| b3138 | agaB | Isolate 2 | non-essential | N-acetylgalactosamine-specific enzyme IIB component of PTS       | -1.11 |
| b3139 | agaC | Isolate 1 | non-essential | N-acetylgalactosamine-specific enzyme IIC component of PTS       | 1.60  |
| b3139 | agaC | Isolate 2 | non-essential | N-acetylgalactosamine-specific enzyme IIC component of PTS       | 1.17  |
| b3140 | agaD | Isolate 1 | non-essential | N-acetylgalactosamine-specific enzyme IID component of PTS       | 0.48  |
| b3140 | agaD | Isolate 2 | non-essential | N-acetylgalactosamine-specific enzyme IID component of PTS       | 0.51  |
| b3141 | agaI | Isolate 1 | non-essential | galactosamine-6-phosphate isomerase                              | -1.43 |
| b3141 | agaI | Isolate 2 | non-essential | galactosamine-6-phosphate isomerase                              | 0.12  |
| b3142 | yraH | Isolate 1 | non-essential | predicted fimbrial-like adhesin protein                          | -0.16 |
| b3142 | yraH | Isolate 2 | non-essential | predicted fimbrial-like adhesin protein                          | 0.45  |
| b3143 | yraI | Isolate 1 | non-essential | predicted periplasmic pilin chaperone                            | 0.04  |
| b3143 | yraI | Isolate 2 | non-essential | predicted periplasmic pilin chaperone                            | -0.44 |
| b3144 | yraJ | Isolate 1 | non-essential | predicted outer membrane protein                                 | -2.50 |
| b3144 | yraJ | Isolate 2 | non-essential | predicted outer membrane protein                                 | -1.11 |
| b3145 | yraK | Isolate 1 | non-essential | predicted fimbrial-like adhesin protein                          | -0.89 |
| b3145 | yraK | Isolate 2 | non-essential | predicted fimbrial-like adhesin protein                          | -0.31 |
| b3146 | yraL | Isolate 1 | essential     | predicted methyltransferase                                      | -1.07 |
| b3147 | yraM | Isolate 1 | non-essential | conserved protein                                                | 1.45  |
| b3147 | yraM | Isolate 2 | non-essential | conserved protein                                                | 1.51  |
| b3148 | yraN | Isolate 1 | non-essential | conserved protein                                                | 2.89  |
| b3148 | yraN | Isolate 2 | non-essential | conserved protein                                                | -0.55 |
| b3149 | yraO | Isolate 1 | non-essential | DnaA initiator-associating factor for replication initiation     | -0.19 |
| b3149 | yraO | Isolate 2 | non-essential | DnaA initiator-associating factor for replication initiation     | -0.49 |
| b3150 | yraP | Isolate 1 | non-essential | predicted protein                                                | 2.04  |
| b3150 | yraP | Isolate 2 | non-essential | predicted protein                                                | -0.19 |
| b3151 | yraQ | Isolate 1 | non-essential | predicted permease                                               | 0.78  |
| b3151 | yraQ | Isolate 2 | non-essential | predicted permease                                               | 1.06  |
| b3152 | yraR | Isolate 1 | non-essential | predicted nucleoside-diphosphate-sugar epimerase                 | 1.84  |
| b3152 | yraR | Isolate 2 | non-essential | predicted nucleoside-diphosphate-sugar epimerase                 | 1.07  |
| b3153 | yhbO | Isolate 1 | non-essential | predicted intracellular protease                                 | -0.76 |
| b3153 | yhbO | Isolate 2 | non-essential | predicted intracellular protease                                 | -1.60 |
| b3154 | yhbP | Isolate 1 | non-essential | conserved protein                                                | 0.38  |
| b3154 | yhbP | Isolate 2 | non-essential | conserved protein                                                | 1.54  |
| b3155 | yhbQ | Isolate 1 | non-essential | predicted endonuclease                                           | -0.81 |
| b3155 | yhbQ | Isolate 2 | non-essential | predicted endonuclease                                           | 0.32  |
| b3156 | yhbS | Isolate 1 | non-essential | predicted acyltransferase with acyl-CoA N-acyltransferase domain | 0.84  |
| b3156 | yhbS | Isolate 2 | non-essential | predicted acyltransferase with acyl-CoA N-acyltransferase domain | -0.27 |
| b3157 | yhbT | Isolate 1 | non-essential | predicted lipid carrier protein                                  | 0.12  |
| b3157 | yhbT | Isolate 2 | non-essential | predicted lipid carrier protein                                  | -0.05 |
| b3158 | yhbU | Isolate 1 | non-essential | predicted peptidase (collagenase-like)                           | -2.37 |

|       |      |           |               |                                                     |       |
|-------|------|-----------|---------------|-----------------------------------------------------|-------|
| b3158 | yhbU | Isolate 2 | non-essential | predicted peptidase (collagenase-like)              | -0.13 |
| b3159 | yhbV | Isolate 1 | essential     | predicted protease                                  | -1.79 |
| b3160 | yhbW | Isolate 1 | non-essential | predicted enzyme                                    | 2.26  |
| b3160 | yhbW | Isolate 2 | non-essential | predicted enzyme                                    | 0.77  |
| b3161 | mtr  | Isolate 1 | non-essential | tryptophan transporter of high affinity             | 1.04  |
| b3161 | mtr  | Isolate 2 | non-essential | tryptophan transporter of high affinity             | 1.97  |
| b3162 | deaD | Isolate 1 | non-essential | ATP-dependent RNA helicase                          | -0.23 |
| b3162 | deaD | Isolate 2 | non-essential | ATP-dependent RNA helicase                          | -1.81 |
| b3163 | nlpI | Isolate 1 | non-essential | conserved protein                                   | 0.44  |
| b3163 | nlpI | Isolate 2 | non-essential | conserved protein                                   | 1.30  |
| b3164 | pnp  | Isolate 1 | non-essential | polynucleotide phosphorylase/polyadenylase          | 0.33  |
| b3164 | pnp  | Isolate 2 | non-essential | polynucleotide phosphorylase/polyadenylase          | 1.11  |
| b3165 | rpsO | Isolate 1 | non-essential | 30S ribosomal subunit protein S15                   | -0.57 |
| b3165 | rpsO | Isolate 2 | non-essential | 30S ribosomal subunit protein S15                   | -2.35 |
| b3166 | truB | Isolate 1 | non-essential | tRNA pseudouridine synthase                         | 2.72  |
| b3166 | truB | Isolate 2 | non-essential | tRNA pseudouridine synthase                         | -0.06 |
| b3167 | rbfA | Isolate 1 | non-essential | 30s ribosome binding factor                         | 8.16  |
| b3167 | rbfA | Isolate 2 | non-essential | 30s ribosome binding factor                         | 0.75  |
| b3169 | nusA | Isolate 1 | essential     | transcription terminatio*ntermination L factor      | 0.19  |
| b3170 | yhbC | Isolate 1 | non-essential | conserved protein                                   | 0.82  |
| b3170 | yhbC | Isolate 2 | non-essential | conserved protein                                   | 2.63  |
| b3172 | argG | Isolate 1 | non-essential | argininosuccinate synthetase                        | -0.35 |
| b3172 | argG | Isolate 2 | non-essential | argininosuccinate synthetase                        | -1.10 |
| b3173 | yhbX | Isolate 1 | non-essential | predicted hydrolase, inner membrane                 | 0.12  |
| b3173 | yhbX | Isolate 2 | non-essential | predicted hydrolase, inner membrane                 | -0.51 |
| b3175 | secG | Isolate 1 | non-essential | preprotein translocase membrane subunit             | -0.35 |
| b3175 | secG | Isolate 2 | non-essential | preprotein translocase membrane subunit             | -0.03 |
| b3176 | glmM | Isolate 1 | non-essential | phosphoglucosamine mutase                           | -0.42 |
| b3176 | glmM | Isolate 2 | non-essential | phosphoglucosamine mutase                           | -1.09 |
| b3177 | folP | Isolate 1 | non-essential | 7,8-dihydropteroate synthase                        | 1.63  |
| b3177 | folP | Isolate 2 | non-essential | 7,8-dihydropteroate synthase                        | 0.94  |
| b3178 | ftsH | Isolate 1 | essential     | protease, ATP-dependent zinc-metallo                | -0.12 |
| b3179 | rrmJ | Isolate 1 | non-essential | 23S rRNA methyltransferase                          | 0.24  |
| b3179 | rrmJ | Isolate 2 | non-essential | 23S rRNA methyltransferase                          | -0.96 |
| b3180 | yhbY | Isolate 1 | non-essential | predicted RNA-binding protein                       | 0.48  |
| b3180 | yhbY | Isolate 2 | non-essential | predicted RNA-binding protein                       | 0.86  |
| b3181 | greA | Isolate 1 | non-essential | transcription elongation factor                     | 0.35  |
| b3181 | greA | Isolate 2 | non-essential | transcription elongation factor                     | 0.59  |
| b3182 | dacB | Isolate 1 | non-essential | D-alanyl-D-alanine carboxypeptidase                 | 2.43  |
| b3182 | dacB | Isolate 2 | non-essential | D-alanyl-D-alanine carboxypeptidase                 | -0.32 |
| b3183 | obgE | Isolate 1 | essential     | GTPase involved in cell partitioning and DNA repair | 0.57  |
| b3184 | yhbE | Isolate 1 | non-essential | conserved inner membrane protein                    | 1.46  |
| b3184 | yhbE | Isolate 2 | non-essential | conserved inner membrane protein                    | 1.31  |

|       |      |           |               |                                                                                             |       |
|-------|------|-----------|---------------|---------------------------------------------------------------------------------------------|-------|
| b3188 | sfsB | Isolate 1 | non-essential | DNA-binding transcriptional regulator                                                       | -0.49 |
| b3188 | sfsB | Isolate 2 | non-essential | DNA-binding transcriptional regulator                                                       | 1.80  |
| b3189 | murA | Isolate 1 | essential     | UDP-N-acetylglucosamine 1-carboxyvinyltransferase                                           | 0.70  |
| b3190 | yrbA | Isolate 1 | non-essential | predicted DNA-binding transcriptional regulator                                             | 1.92  |
| b3190 | yrbA | Isolate 2 | non-essential | predicted DNA-binding transcriptional regulator                                             | 1.82  |
| b3192 | yrbC | Isolate 1 | non-essential | predicted ABC-type organic solvent transporter                                              | 1.19  |
| b3192 | yrbC | Isolate 2 | non-essential | predicted ABC-type organic solvent transporter                                              | 3.13  |
| b3193 | yrbD | Isolate 1 | non-essential | predicted ABC-type organic solvent transporter                                              | 1.33  |
| b3193 | yrbD | Isolate 2 | non-essential | predicted ABC-type organic solvent transporter                                              | 1.36  |
| b3194 | yrbE | Isolate 1 | non-essential | predicted toluene transporter subunit-!- membrane component of ABC superfamily              | 1.26  |
| b3194 | yrbE | Isolate 2 | non-essential | predicted toluene transporter subunit-!- membrane component of ABC superfamily              | 2.06  |
| b3195 | yrbF | Isolate 1 | non-essential | predicted toluene transporter subunit -!- ATP-binding component of ABC superfamily          | 1.74  |
| b3195 | yrbF | Isolate 2 | non-essential | predicted toluene transporter subunit -!- ATP-binding component of ABC superfamily          | 1.80  |
| b3196 | yrbG | Isolate 1 | non-essential | predicted calcium/sodium:proton antiporter                                                  | 0.01  |
| b3196 | yrbG | Isolate 2 | non-essential | predicted calcium/sodium:proton antiporter                                                  | -0.16 |
| b3197 | kdsD | Isolate 1 | non-essential | D-arabinose 5-phosphate isomerase                                                           | -1.29 |
| b3197 | kdsD | Isolate 2 | non-essential | D-arabinose 5-phosphate isomerase                                                           | 2.20  |
| b3198 | kdsC | Isolate 1 | non-essential | 3-deoxy-D-manno-octulosonate 8-phosphate phosphatase                                        | -0.89 |
| b3198 | kdsC | Isolate 2 | non-essential | 3-deoxy-D-manno-octulosonate 8-phosphate phosphatase                                        | -0.09 |
| b3200 | yhbN | Isolate 1 | essential     | predicted transporter subunit -!- periplasmic-binding component of ABC superfamily          | 2.14  |
| b3201 | yhbG | Isolate 1 | non-essential | predicted transporter subunit -!- ATP-binding component of ABC superfamily                  | -2.21 |
| b3201 | yhbG | Isolate 2 | non-essential | predicted transporter subunit -!- ATP-binding component of ABC superfamily                  | 1.02  |
| b3202 | rpoN | Isolate 1 | non-essential | RNA polymerase, sigma 54 (sigma N) factor                                                   | 0.12  |
| b3202 | rpoN | Isolate 2 | non-essential | RNA polymerase, sigma 54 (sigma N) factor                                                   | -0.36 |
| b3203 | yhbH | Isolate 1 | non-essential | predicted ribosome-associated, sigma 54 modulation protein                                  | -0.33 |
| b3203 | yhbH | Isolate 2 | non-essential | predicted ribosome-associated, sigma 54 modulation protein                                  | 1.16  |
| b3204 | ptsN | Isolate 1 | non-essential | sugar-specific enzyme IIA component of PTS                                                  | -0.46 |
| b3204 | ptsN | Isolate 2 | non-essential | sugar-specific enzyme IIA component of PTS                                                  | 0.90  |
| b3205 | yhbJ | Isolate 1 | non-essential | predicted protein with nucleoside triphosphate hydrolase domain                             | 0.30  |
| b3205 | yhbJ | Isolate 2 | non-essential | predicted protein with nucleoside triphosphate hydrolase domain                             | 0.03  |
| b3206 | npr  | Isolate 1 | non-essential | phosphohistidinoprotein-hexose phosphotransferase component of N-regulated PTS system (Npr) | 1.33  |
| b3206 | npr  | Isolate 2 | non-essential | phosphohistidinoprotein-hexose phosphotransferase component of N-regulated PTS system (Npr) | 1.89  |
| b3207 | yrbL | Isolate 1 | non-essential | predicted protein                                                                           | -0.28 |
| b3207 | yrbL | Isolate 2 | non-essential | predicted protein                                                                           | 1.07  |
| b3208 | mtgA | Isolate 1 | non-essential | biosynthetic peptidoglycan transglycosylase                                                 | -0.87 |
| b3208 | mtgA | Isolate 2 | non-essential | biosynthetic peptidoglycan transglycosylase                                                 | -0.76 |
| b3209 | elbB | Isolate 1 | non-essential | isoprenoid biosynthesis protein with amidotransferase-like domain                           | 2.12  |
| b3209 | elbB | Isolate 2 | non-essential | isoprenoid biosynthesis protein with amidotransferase-like domain                           | -0.06 |
| b3210 | arcB | Isolate 1 | non-essential | hybrid sensory histidine kinase in two-component regulatory system with ArcA                | -0.92 |
| b3210 | arcB | Isolate 2 | non-essential | hybrid sensory histidine kinase in two-component regulatory system with ArcA                | -1.57 |
| b3211 | yhcC | Isolate 1 | non-essential | predicted Fe-S oxidoreductase                                                               | 1.59  |
| b3211 | yhcC | Isolate 2 | non-essential | predicted Fe-S oxidoreductase                                                               | 1.95  |
| b3212 | gltB | Isolate 1 | non-essential | glutamate synthase, large subunit                                                           | -1.40 |

|       |      |           |               |                                                                 |       |
|-------|------|-----------|---------------|-----------------------------------------------------------------|-------|
| b3212 | gltB | Isolate 2 | non-essential | glutamate synthase, large subunit                               | -0.67 |
| b3213 | gltD | Isolate 1 | non-essential | glutamate synthase, 4Fe-4S protein, small subunit               | -0.88 |
| b3213 | gltD | Isolate 2 | non-essential | glutamate synthase, 4Fe-4S protein, small subunit               | -0.91 |
| b3214 | gltF | Isolate 1 | non-essential | periplasmic protein                                             | -1.31 |
| b3214 | gltF | Isolate 2 | non-essential | periplasmic protein                                             | -0.06 |
| b3215 | yhcA | Isolate 1 | non-essential | predicted periplasmic chaperone protein                         | 0.52  |
| b3215 | yhcA | Isolate 2 | non-essential | predicted periplasmic chaperone protein                         | -1.28 |
| b3216 | yhcD | Isolate 1 | non-essential | predicted outer membrane protein                                | 0.52  |
| b3216 | yhcD | Isolate 2 | non-essential | predicted outer membrane protein                                | 0.42  |
| b3217 | yhcE | Isolate 1 | *             | predicted protein, N-ter fragment (pseudogene)                  | -0.17 |
| b3217 | yhcE | Isolate 2 | *             | predicted protein, N-ter fragment (pseudogene)                  | -2.63 |
| b3219 | yhcF | Isolate 1 | non-essential | predicted transcriptional regulator                             | 0.06  |
| b3219 | yhcF | Isolate 2 | non-essential | predicted transcriptional regulator                             | 0.83  |
| b3220 | yhcG | Isolate 1 | non-essential | conserved protein                                               | 0.44  |
| b3220 | yhcG | Isolate 2 | non-essential | conserved protein                                               | 0.61  |
| b3221 | yhcH | Isolate 1 | non-essential | conserved protein                                               | 0.19  |
| b3221 | yhcH | Isolate 2 | non-essential | conserved protein                                               | 0.80  |
| b3222 | nanK | Isolate 1 | non-essential | predicted N-acetylmannosamine kinase                            | 0.30  |
| b3222 | nanK | Isolate 2 | non-essential | predicted N-acetylmannosamine kinase                            | 1.37  |
| b3223 | nanE | Isolate 1 | non-essential | predicted N-acetylmannosamine-6-P epimerase                     | -0.95 |
| b3223 | nanE | Isolate 2 | non-essential | predicted N-acetylmannosamine-6-P epimerase                     | 1.69  |
| b3224 | nanT | Isolate 1 | non-essential | sialic acid transporter                                         | 4.74  |
| b3224 | nanT | Isolate 2 | non-essential | sialic acid transporter                                         | 2.59  |
| b3225 | nanA | Isolate 1 | non-essential | N-acetylneuraminate lyase                                       | 2.84  |
| b3225 | nanA | Isolate 2 | non-essential | N-acetylneuraminate lyase                                       | -0.21 |
| b3226 | nanR | Isolate 1 | non-essential | DNA-binding transcriptional dual regulator                      | 0.16  |
| b3226 | nanR | Isolate 2 | non-essential | DNA-binding transcriptional dual regulator                      | -0.91 |
| b3227 | dcuD | Isolate 1 | non-essential | predicted transporter                                           | 0.38  |
| b3227 | dcuD | Isolate 2 | non-essential | predicted transporter                                           | -0.66 |
| b3228 | sspB | Isolate 1 | non-essential | ClpXP protease specificity-enhancing factor                     | -0.52 |
| b3228 | sspB | Isolate 2 | non-essential | ClpXP protease specificity-enhancing factor                     | -0.97 |
| b3229 | sspA | Isolate 1 | non-essential | stringent starvation protein A                                  | -0.82 |
| b3229 | sspA | Isolate 2 | non-essential | stringent starvation protein A                                  | -1.10 |
| b3232 | yhcM | Isolate 1 | non-essential | conserved protein with nucleoside triphosphate hydrolase domain | 0.01  |
| b3232 | yhcM | Isolate 2 | non-essential | conserved protein with nucleoside triphosphate hydrolase domain | 0.41  |
| b3233 | yhcB | Isolate 1 | non-essential | conserved protein                                               | 2.76  |
| b3233 | yhcB | Isolate 2 | non-essential | conserved protein                                               | 1.86  |
| b3234 | degQ | Isolate 1 | non-essential | serine endoprotease, periplasmic                                | -2.06 |
| b3234 | degQ | Isolate 2 | non-essential | serine endoprotease, periplasmic                                | -1.50 |
| b3236 | mdh  | Isolate 1 | non-essential | malate dehydrogenase, NAD(P)-binding                            | -0.35 |
| b3236 | mdh  | Isolate 2 | non-essential | malate dehydrogenase, NAD(P)-binding                            | 2.01  |
| b3237 | argR | Isolate 1 | non-essential | DNA-binding transcriptional dual regulator, L-arginine-binding  | 0.02  |
| b3237 | argR | Isolate 2 | non-essential | DNA-binding transcriptional dual regulator, L-arginine-binding  | -0.41 |

|       |      |           |               |                                                                |       |
|-------|------|-----------|---------------|----------------------------------------------------------------|-------|
| b3238 | yhcN | Isolate 1 | non-essential | conserved protein                                              | 0.85  |
| b3238 | yhcN | Isolate 2 | non-essential | conserved protein                                              | 0.28  |
| b3239 | yhcO | Isolate 1 | non-essential | predicted barnase inhibitor                                    | -0.11 |
| b3239 | yhcO | Isolate 2 | non-essential | predicted barnase inhibitor                                    | 2.72  |
| b3240 | aaeB | Isolate 1 | non-essential | p-hydroxybenzoic acid efflux system component                  | 0.27  |
| b3240 | aaeB | Isolate 2 | non-essential | p-hydroxybenzoic acid efflux system component                  | -0.41 |
| b3241 | aaeA | Isolate 1 | non-essential | p-hydroxybenzoic acid efflux system component                  | 1.43  |
| b3241 | aaeA | Isolate 2 | non-essential | p-hydroxybenzoic acid efflux system component                  | 2.66  |
| b3242 | aaeX | Isolate 1 | non-essential | membrane protein of efflux system                              | 1.29  |
| b3242 | aaeX | Isolate 2 | non-essential | membrane protein of efflux system                              | -0.62 |
| b3243 | aaeR | Isolate 1 | non-essential | predicted DNA-binding transcriptional regulator, efflux system | 0.32  |
| b3243 | aaeR | Isolate 2 | non-essential | predicted DNA-binding transcriptional regulator, efflux system | 0.40  |
| b3244 | tldD | Isolate 1 | non-essential | predicted peptidase                                            | 0.62  |
| b3244 | tldD | Isolate 2 | non-essential | predicted peptidase                                            | 2.73  |
| b3247 | rng  | Isolate 1 | non-essential | ribonuclease G                                                 | 0.27  |
| b3247 | rng  | Isolate 2 | non-essential | ribonuclease G                                                 | 3.77  |
| b3248 | yhdE | Isolate 1 | non-essential | conserved protein                                              | 0.75  |
| b3248 | yhdE | Isolate 2 | non-essential | conserved protein                                              | 0.41  |
| b3251 | mreB | Isolate 1 | essential     | cell wall structural complex MreBCD, actin-like component MreB | -0.07 |
| b3252 | yhdA | Isolate 1 | non-essential | conserved inner membrane protein                               | -0.71 |
| b3252 | yhdA | Isolate 2 | non-essential | conserved inner membrane protein                               | -0.49 |
| b3253 | yhdH | Isolate 1 | non-essential | predicted oxidoreductase, Zn-dependent and NAD(P)-binding      | -0.59 |
| b3253 | yhdH | Isolate 2 | non-essential | predicted oxidoreductase, Zn-dependent and NAD(P)-binding      | 0.73  |
| b3257 | yhdT | Isolate 1 | non-essential | conserved inner membrane protein                               | 1.31  |
| b3257 | yhdT | Isolate 2 | non-essential | conserved inner membrane protein                               | -0.18 |
| b3258 | panF | Isolate 1 | non-essential | pantothenate:sodium symporter                                  | -0.82 |
| b3258 | panF | Isolate 2 | non-essential | pantothenate:sodium symporter                                  | 0.46  |
| b3259 | prmA | Isolate 1 | non-essential | methylase for 50S ribosomal subunit protein L11                | 2.40  |
| b3259 | prmA | Isolate 2 | non-essential | methylase for 50S ribosomal subunit protein L11                | 0.52  |
| b3260 | dusB | Isolate 1 | non-essential | tRNA-dihydrouridine synthase B                                 | -0.16 |
| b3260 | dusB | Isolate 2 | non-essential | tRNA-dihydrouridine synthase B                                 | -0.15 |
| b3261 | fis  | Isolate 1 | non-essential | global DNA-binding transcriptional dual regulator              | 0.48  |
| b3261 | fis  | Isolate 2 | non-essential | global DNA-binding transcriptional dual regulator              | 1.49  |
| b3262 | yhdJ | Isolate 1 | non-essential | predicted methyltransferase                                    | 0.72  |
| b3262 | yhdJ | Isolate 2 | non-essential | predicted methyltransferase                                    | 3.05  |
| b3263 | yhdU | Isolate 1 | non-essential | predicted membrane protein                                     | 1.13  |
| b3263 | yhdU | Isolate 2 | non-essential | predicted membrane protein                                     | 1.17  |
| b3264 | envR | Isolate 1 | non-essential | DNA-binding transcriptional regulator                          | 1.74  |
| b3264 | envR | Isolate 2 | non-essential | DNA-binding transcriptional regulator                          | 1.93  |
| b3265 | acrE | Isolate 1 | non-essential | cytoplasmic membrane lipoprotein                               | 0.17  |
| b3265 | acrE | Isolate 2 | non-essential | cytoplasmic membrane lipoprotein                               | -1.32 |
| b3266 | acrF | Isolate 1 | non-essential | multidrug efflux system protein                                | 1.67  |
| b3266 | acrF | Isolate 2 | non-essential | multidrug efflux system protein                                | -1.24 |



|       |      |           |               |                                                                                               |       |
|-------|------|-----------|---------------|-----------------------------------------------------------------------------------------------|-------|
| b3267 | yhdV | Isolate 1 | non-essential | predicted outer membrane protein                                                              | 0.21  |
| b3267 | yhdV | Isolate 2 | non-essential | predicted outer membrane protein                                                              | 1.32  |
| b3268 | yhdW | Isolate 1 | non-essential | predicted amino-acid transporter subunit -!- periplasmic-binding component of ABC superfamily | 0.04  |
| b3268 | yhdW | Isolate 2 | non-essential | predicted amino-acid transporter subunit -!- periplasmic-binding component of ABC superfamily | 0.53  |
| b3269 | yhdX | Isolate 1 | non-essential | predicted amino-acid transporter subunit -!- membrane component of ABC superfamily            | -0.60 |
| b3269 | yhdX | Isolate 2 | non-essential | predicted amino-acid transporter subunit -!- membrane component of ABC superfamily            | 0.62  |
| b3270 | yhdY | Isolate 1 | non-essential | predicted amino-acid transporter subunit -!- membrane component of ABC superfamily            | 1.45  |
| b3270 | yhdY | Isolate 2 | non-essential | predicted amino-acid transporter subunit -!- membrane component of ABC superfamily            | 0.63  |
| b3271 | yhdZ | Isolate 1 | non-essential | predicted amino-acid transporter subunit -!- ATP-binding component of ABC superfamily         | -2.98 |
| b3271 | yhdZ | Isolate 2 | non-essential | predicted amino-acid transporter subunit -!- ATP-binding component of ABC superfamily         | -0.09 |
| b3279 | yrdA | Isolate 1 | non-essential | conserved protein                                                                             | -1.72 |
| b3279 | yrdA | Isolate 2 | non-essential | conserved protein                                                                             | 0.12  |
| b3280 | yrdB | Isolate 1 | non-essential | conserved protein                                                                             | -0.54 |
| b3280 | yrdB | Isolate 2 | non-essential | conserved protein                                                                             | 1.07  |
| b3281 | aroE | Isolate 1 | non-essential | dehydroshikimate reductase, NAD(P)-binding                                                    | 0.88  |
| b3281 | aroE | Isolate 2 | non-essential | dehydroshikimate reductase, NAD(P)-binding                                                    | 1.95  |
| b3282 | yrdC | Isolate 1 | essential     | dsRNA-binding protein                                                                         | 0.82  |
| b3283 | yrdD | Isolate 1 | non-essential | predicted DNA topoisomerase                                                                   | 0.50  |
| b3283 | yrdD | Isolate 2 | non-essential | predicted DNA topoisomerase                                                                   | 0.25  |
| b3284 | smg  | Isolate 1 | non-essential | conserved protein                                                                             | 0.44  |
| b3284 | smg  | Isolate 2 | non-essential | conserved protein                                                                             | 0.75  |
| b3287 | def  | Isolate 1 | essential     | peptide deformylase                                                                           | 0.78  |
| b3289 | rsmB | Isolate 1 | non-essential | 16S rRNA m5C967 methyltransferase, S-adenosyl-L-methionine-dependent                          | 0.71  |
| b3289 | rsmB | Isolate 2 | non-essential | 16S rRNA m5C967 methyltransferase, S-adenosyl-L-methionine-dependent                          | -1.28 |
| b3290 | trkA | Isolate 1 | non-essential | NAD-binding component of Trk potassium transporter                                            | 1.09  |
| b3290 | trkA | Isolate 2 | non-essential | NAD-binding component of Trk potassium transporter                                            | 0.39  |
| b3291 | mscL | Isolate 1 | non-essential | mechanosensitive channel                                                                      | 1.33  |
| b3291 | mscL | Isolate 2 | non-essential | mechanosensitive channel                                                                      | 0.72  |
| b3292 | zntR | Isolate 1 | non-essential | DNA-binding transcriptional activator                                                         | 1.32  |
| b3292 | zntR | Isolate 2 | non-essential | DNA-binding transcriptional activator                                                         | 0.63  |
| b3293 | yhdN | Isolate 1 | non-essential | conserved protein                                                                             | -0.41 |
| b3293 | yhdN | Isolate 2 | non-essential | conserved protein                                                                             | 0.44  |
| b3295 | rpoA | Isolate 1 | essential     | RNA polymerase, alpha subunit                                                                 | 2.23  |
| b3299 | rpmJ | Isolate 1 | non-essential | 50S ribosomal subunit protein L36                                                             | -0.58 |
| b3299 | rpmJ | Isolate 2 | non-essential | 50S ribosomal subunit protein L36                                                             | 2.19  |
| b3303 | rpsE | Isolate 1 | essential     | 30S ribosomal subunit protein S5                                                              | 2.98  |
| b3318 | rplW | Isolate 1 | essential     | 50S ribosomal subunit protein L23                                                             | 1.19  |
| b3319 | rplD | Isolate 1 | essential     | 50S ribosomal subunit protein L4                                                              | 4.85  |
| b3322 | pioO | Isolate 1 | non-essential | part of gsp divergon involved in type II protein secretion                                    | 1.86  |
| b3322 | pioO | Isolate 2 | non-essential | part of gsp divergon involved in type II protein secretion                                    | 0.73  |
| b3323 | gspA | Isolate 1 | non-essential | general secretory pathway component, cryptic                                                  | -0.24 |
| b3323 | gspA | Isolate 2 | non-essential | general secretory pathway component, cryptic                                                  | -1.65 |
| b3324 | gspC | Isolate 1 | non-essential | general secretory pathway component, cryptic                                                  | -0.34 |

|       |      |           |               |                                                           |       |
|-------|------|-----------|---------------|-----------------------------------------------------------|-------|
| b3324 | gspC | Isolate 2 | non-essential | general secretory pathway component, cryptic              | 2.10  |
| b3325 | gspD | Isolate 1 | non-essential | general secretory pathway component, cryptic              | 1.71  |
| b3325 | gspD | Isolate 2 | non-essential | general secretory pathway component, cryptic              | 0.56  |
| b3326 | gspE | Isolate 1 | non-essential | general secretory pathway component, cryptic              | 1.08  |
| b3326 | gspE | Isolate 2 | non-essential | general secretory pathway component, cryptic              | -0.82 |
| b3327 | gspF | Isolate 1 | non-essential | general secretory pathway component, cryptic              | -0.36 |
| b3327 | gspF | Isolate 2 | non-essential | general secretory pathway component, cryptic              | -0.97 |
| b3328 | gspG | Isolate 1 | non-essential | pseudopilin, cryptic, general secretion pathway           | 0.79  |
| b3328 | gspG | Isolate 2 | non-essential | pseudopilin, cryptic, general secretion pathway           | 0.96  |
| b3329 | gspH | Isolate 1 | non-essential | predicted general secretory pathway component, cryptic    | -0.07 |
| b3329 | gspH | Isolate 2 | non-essential | predicted general secretory pathway component, cryptic    | 2.74  |
| b3330 | gspI | Isolate 1 | non-essential | general secretory pathway component, cryptic              | 1.48  |
| b3330 | gspI | Isolate 2 | non-essential | general secretory pathway component, cryptic              | -0.63 |
| b3331 | gspJ | Isolate 1 | non-essential | predicted general secretory pathway component, cryptic    | 1.65  |
| b3331 | gspJ | Isolate 2 | non-essential | predicted general secretory pathway component, cryptic    | 2.36  |
| b3332 | gspK | Isolate 1 | non-essential | general secretory pathway component, cryptic              | -0.73 |
| b3332 | gspK | Isolate 2 | non-essential | general secretory pathway component, cryptic              | -0.36 |
| b3333 | gspL | Isolate 1 | non-essential | general secretory pathway component, cryptic              | -1.91 |
| b3333 | gspL | Isolate 2 | non-essential | general secretory pathway component, cryptic              | -0.22 |
| b3334 | gspM | Isolate 1 | non-essential | general secretory pathway component, cryptic              | 1.47  |
| b3334 | gspM | Isolate 2 | non-essential | general secretory pathway component, cryptic              | 1.20  |
| b3335 | gspO | Isolate 1 | non-essential | bifunctional prepilin leader peptidase -!- methylase      | -0.15 |
| b3335 | gspO | Isolate 2 | non-essential | bifunctional prepilin leader peptidase -!- methylase      | -0.44 |
| b3336 | bfr  | Isolate 1 | non-essential | bacterioferritin, iron storage and detoxification protein | 0.30  |
| b3336 | bfr  | Isolate 2 | non-essential | bacterioferritin, iron storage and detoxification protein | -0.37 |
| b3337 | bfd  | Isolate 1 | non-essential | bacterioferritin-associated ferredoxin                    | -0.12 |
| b3337 | bfd  | Isolate 2 | non-essential | bacterioferritin-associated ferredoxin                    | -0.56 |
| b3338 | chiA | Isolate 1 | non-essential | periplasmic endochitinase                                 | 0.29  |
| b3338 | chiA | Isolate 2 | non-essential | periplasmic endochitinase                                 | -0.02 |
| b3339 | tufA | Isolate 1 | non-essential | protein chain elongation factor EF-Tu (duplicate of tufB) | -1.85 |
| b3339 | tufA | Isolate 2 | non-essential | protein chain elongation factor EF-Tu (duplicate of tufB) | -9.66 |
| b3340 | fusA | Isolate 1 | essential     | protein chain elongation factor EF-G                      | 6.79  |
| b3343 | yheL | Isolate 1 | non-essential | predicted intracellular sulfur oxidation protein          | -1.47 |
| b3343 | yheL | Isolate 2 | non-essential | predicted intracellular sulfur oxidation protein          | 5.44  |
| b3344 | yheM | Isolate 1 | non-essential | predicted intracellular sulfur oxidation protein          | -1.80 |
| b3344 | yheM | Isolate 2 | non-essential | predicted intracellular sulfur oxidation protein          | -1.29 |
| b3345 | yheN | Isolate 1 | non-essential | predicted intracellular sulfur oxidation protein          | 0.70  |
| b3345 | yheN | Isolate 2 | non-essential | predicted intracellular sulfur oxidation protein          | -0.84 |
| b3346 | yheO | Isolate 1 | non-essential | predicted DNA-binding transcriptional regulator           | 2.30  |
| b3346 | yheO | Isolate 2 | non-essential | predicted DNA-binding transcriptional regulator           | 1.57  |
| b3347 | fkpA | Isolate 1 | non-essential | FKBP-type peptidyl-prolyl cis-trans isomerase (rotamase)  | 0.16  |
| b3347 | fkpA | Isolate 2 | non-essential | FKBP-type peptidyl-prolyl cis-trans isomerase (rotamase)  | 1.67  |
| b3348 | slyX | Isolate 1 | non-essential | conserved protein                                         | 1.27  |

|       |      |           |               |                                                                                                                               |       |
|-------|------|-----------|---------------|-------------------------------------------------------------------------------------------------------------------------------|-------|
| b3348 | slyX | Isolate 2 | non-essential | conserved protein                                                                                                             | -0.12 |
| b3349 | slyD | Isolate 1 | non-essential | FKBP-type peptidyl prolyl cis-trans isomerase (rotamase)                                                                      | 0.89  |
| b3349 | slyD | Isolate 2 | non-essential | FKBP-type peptidyl prolyl cis-trans isomerase (rotamase)                                                                      | 2.23  |
| b3350 | kefB | Isolate 1 | non-essential | potassium:proton antiporter                                                                                                   | -0.93 |
| b3350 | kefB | Isolate 2 | non-essential | potassium:proton antiporter                                                                                                   | 1.48  |
| b3351 | kefG | Isolate 1 | non-essential | component of potassium efflux complex with KefB                                                                               | 0.36  |
| b3351 | kefG | Isolate 2 | non-essential | component of potassium efflux complex with KefB                                                                               | -0.45 |
| b3352 | yheS | Isolate 1 | non-essential | fused predicted transporter subunits -!- ATP-binding components of ABC superfamily                                            | 1.91  |
| b3352 | yheS | Isolate 2 | non-essential | fused predicted transporter subunits -!- ATP-binding components of ABC superfamily                                            | -0.76 |
| b3353 | yheT | Isolate 1 | non-essential | predicted hydrolase                                                                                                           | 0.27  |
| b3353 | yheT | Isolate 2 | non-essential | predicted hydrolase                                                                                                           | 0.84  |
| b3354 | yheU | Isolate 1 | non-essential | conserved protein                                                                                                             | -0.59 |
| b3354 | yheU | Isolate 2 | non-essential | conserved protein                                                                                                             | 0.33  |
| b3355 | prkB | Isolate 1 | non-essential | predicted phosphoribulokinase                                                                                                 | 2.68  |
| b3355 | prkB | Isolate 2 | non-essential | predicted phosphoribulokinase                                                                                                 | 0.44  |
| b3356 | yhfA | Isolate 1 | non-essential | conserved protein                                                                                                             | 2.73  |
| b3356 | yhfA | Isolate 2 | non-essential | conserved protein                                                                                                             | 1.83  |
| b3357 | crp  | Isolate 1 | non-essential | DNA-binding transcriptional dual regulator                                                                                    | 1.05  |
| b3357 | crp  | Isolate 2 | non-essential | DNA-binding transcriptional dual regulator                                                                                    | -1.04 |
| b3358 | yhfK | Isolate 1 | non-essential | conserved inner membrane protein                                                                                              | 3.32  |
| b3358 | yhfK | Isolate 2 | non-essential | conserved inner membrane protein                                                                                              | 0.71  |
| b3359 | argD | Isolate 1 | non-essential | bifunctional acetylmornithine aminotransferase -!- succinyldiaminopimelate aminotransferase                                   | -0.06 |
| b3359 | argD | Isolate 2 | non-essential | bifunctional acetylmornithine aminotransferase -!- succinyldiaminopimelate aminotransferase                                   | -1.21 |
| b3360 | pabA | Isolate 1 | non-essential | aminodeoxychorismate synthase, subunit II                                                                                     | 1.10  |
| b3360 | pabA | Isolate 2 | non-essential | aminodeoxychorismate synthase, subunit II                                                                                     | 1.67  |
| b3361 | fic  | Isolate 1 | non-essential | stationary-phase protein, cell division                                                                                       | 2.71  |
| b3361 | fic  | Isolate 2 | non-essential | stationary-phase protein, cell division                                                                                       | 1.93  |
| b3362 | yhfG | Isolate 1 | non-essential | predicted protein                                                                                                             | 0.57  |
| b3362 | yhfG | Isolate 2 | non-essential | predicted protein                                                                                                             | -1.91 |
| b3363 | ppiA | Isolate 1 | non-essential | peptidyl-prolyl cis-trans isomerase A (rotamase A)                                                                            | 2.28  |
| b3363 | ppiA | Isolate 2 | non-essential | peptidyl-prolyl cis-trans isomerase A (rotamase A)                                                                            | 5.28  |
| b3364 | tsgA | Isolate 1 | non-essential | predicted transporter                                                                                                         | -0.29 |
| b3364 | tsgA | Isolate 2 | non-essential | predicted transporter                                                                                                         | 0.27  |
| b3365 | nirB | Isolate 1 | non-essential | nitrite reductase, large subunit, NAD(P)H-binding                                                                             | 0.23  |
| b3365 | nirB | Isolate 2 | non-essential | nitrite reductase, large subunit, NAD(P)H-binding                                                                             | -0.84 |
| b3366 | nirD | Isolate 1 | non-essential | nitrite reductase, NAD(P)H-binding, small subunit                                                                             | -0.27 |
| b3366 | nirD | Isolate 2 | non-essential | nitrite reductase, NAD(P)H-binding, small subunit                                                                             | -0.96 |
| b3367 | nirC | Isolate 1 | non-essential | nitrite transporter                                                                                                           | 1.71  |
| b3367 | nirC | Isolate 2 | non-essential | nitrite transporter                                                                                                           | 0.00  |
| b3368 | cysG | Isolate 1 | non-essential | fused siroheme synthase 1,3-dimethyluroporphyriongen III dehydrogenase/siroheme ferrochelatase -!- uroporphyrinogen methyltra | -2.69 |
| b3368 | cysG | Isolate 2 | non-essential | fused siroheme synthase 1,3-dimethyluroporphyriongen III dehydrogenase/siroheme ferrochelatase -!- uroporphyrinogen methyltra | -1.21 |
| b3369 | yhfL | Isolate 1 | non-essential | conserved secreted peptide                                                                                                    | -0.05 |
| b3369 | yhfL | Isolate 2 | non-essential | conserved secreted peptide                                                                                                    | 0.23  |

|       |      |           |               |                                                 |       |
|-------|------|-----------|---------------|-------------------------------------------------|-------|
| b3370 | frlA | Isolate 1 | non-essential | predicted fructoselysine transporter            | -1.64 |
| b3370 | frlA | Isolate 2 | non-essential | predicted fructoselysine transporter            | 2.42  |
| b3371 | frlB | Isolate 1 | non-essential | fructoselysine-6-P-deglycase                    | -0.42 |
| b3371 | frlB | Isolate 2 | non-essential | fructoselysine-6-P-deglycase                    | 1.00  |
| b3374 | frlD | Isolate 1 | non-essential | fructoselysine 6-kinase                         | -0.18 |
| b3374 | frlD | Isolate 2 | non-essential | fructoselysine 6-kinase                         | -0.32 |
| b3375 | frlR | Isolate 1 | non-essential | predicted DNA-binding transcriptional regulator | -0.65 |
| b3375 | frlR | Isolate 2 | non-essential | predicted DNA-binding transcriptional regulator | 1.60  |
| b3376 | yhfS | Isolate 1 | non-essential | conserved protein                               | 1.00  |
| b3376 | yhfS | Isolate 2 | non-essential | conserved protein                               | -1.93 |
| b3377 | yhfT | Isolate 1 | non-essential | predicted inner membrane protein                | -0.51 |
| b3377 | yhfT | Isolate 2 | non-essential | predicted inner membrane protein                | -2.78 |
| b3378 | yhfU | Isolate 1 | non-essential | predicted protein                               | 1.45  |
| b3378 | yhfU | Isolate 2 | non-essential | predicted protein                               | 0.97  |
| b3379 | php  | Isolate 1 | non-essential | predicted hydrolase                             | 0.67  |
| b3379 | php  | Isolate 2 | non-essential | predicted hydrolase                             | 2.21  |
| b3380 | yhfW | Isolate 1 | non-essential | predicted mutase                                | 1.89  |
| b3380 | yhfW | Isolate 2 | non-essential | predicted mutase                                | 0.20  |
| b3381 | yhfX | Isolate 1 | non-essential | predicted amino acid racemase                   | -0.89 |
| b3381 | yhfX | Isolate 2 | non-essential | predicted amino acid racemase                   | -0.53 |
| b3382 | yhfY | Isolate 1 | non-essential | conserved protein                               | -0.44 |
| b3382 | yhfY | Isolate 2 | non-essential | conserved protein                               | 1.00  |
| b3383 | yhfZ | Isolate 1 | non-essential | conserved protein                               | -0.74 |
| b3383 | yhfZ | Isolate 2 | non-essential | conserved protein                               | 1.74  |
| b3384 | trpS | Isolate 1 | essential     | tryptophanyl-tRNA synthetase                    | 0.43  |
| b3385 | gph  | Isolate 1 | non-essential | phosphoglycolate phosphatase                    | 3.56  |
| b3385 | gph  | Isolate 2 | non-essential | phosphoglycolate phosphatase                    | 1.03  |
| b3386 | rpe  | Isolate 1 | non-essential | D-ribulose-5-phosphate 3-epimerase              | 3.52  |
| b3386 | rpe  | Isolate 2 | non-essential | D-ribulose-5-phosphate 3-epimerase              | 0.51  |
| b3387 | dam  | Isolate 1 | non-essential | DNA adenine methylase                           | 2.75  |
| b3387 | dam  | Isolate 2 | non-essential | DNA adenine methylase                           | 2.38  |
| b3388 | damX | Isolate 1 | non-essential | predicted protein                               | -1.55 |
| b3388 | damX | Isolate 2 | non-essential | predicted protein                               | -0.48 |
| b3389 | aroB | Isolate 1 | non-essential | 3-dehydroquinate synthase                       | 2.49  |
| b3389 | aroB | Isolate 2 | non-essential | 3-dehydroquinate synthase                       | -0.79 |
| b3390 | aroK | Isolate 1 | non-essential | shikimate kinase I                              | -0.68 |
| b3390 | aroK | Isolate 2 | non-essential | shikimate kinase I                              | -1.65 |
| b3391 | hofQ | Isolate 1 | non-essential | predicted fimbrial transporter                  | 0.09  |
| b3391 | hofQ | Isolate 2 | non-essential | predicted fimbrial transporter                  | -1.35 |
| b3392 | yrfA | Isolate 1 | non-essential | predicted protein                               | 2.39  |
| b3392 | yrfA | Isolate 2 | non-essential | predicted protein                               | 1.45  |
| b3393 | yrfB | Isolate 1 | non-essential | conserved membrane protein                      | 0.79  |
| b3393 | yrfB | Isolate 2 | non-essential | conserved membrane protein                      | 0.16  |

|       |      |           |               |                                                                                           |        |
|-------|------|-----------|---------------|-------------------------------------------------------------------------------------------|--------|
| b3394 | yrfC | Isolate 1 | non-essential | predicted fimbrial assembly protein                                                       | 0.39   |
| b3394 | yrfC | Isolate 2 | non-essential | predicted fimbrial assembly protein                                                       | 0.46   |
| b3395 | yrfD | Isolate 1 | non-essential | predicted pilus assembly protein                                                          | -1.43  |
| b3395 | yrfD | Isolate 2 | non-essential | predicted pilus assembly protein                                                          | -1.58  |
| b3396 | mrcA | Isolate 1 | non-essential | fused penicillin-binding protein 1a murein transglycosylase -!- murein transpeptidase     | -0.22  |
| b3396 | mrcA | Isolate 2 | non-essential | fused penicillin-binding protein 1a murein transglycosylase -!- murein transpeptidase     | -1.05  |
| b3397 | nudE | Isolate 1 | non-essential | ADP-ribose diphosphatase                                                                  | 0.22   |
| b3397 | nudE | Isolate 2 | non-essential | ADP-ribose diphosphatase                                                                  | -0.66  |
| b3399 | yrfG | Isolate 1 | non-essential | predicted hydrolase                                                                       | -0.28  |
| b3399 | yrfG | Isolate 2 | non-essential | predicted hydrolase                                                                       | -1.63  |
| b3400 | hslR | Isolate 1 | non-essential | ribosome-associated heat shock protein Hsp15                                              | 3.19   |
| b3400 | hslR | Isolate 2 | non-essential | ribosome-associated heat shock protein Hsp15                                              | 2.12   |
| b3401 | hslO | Isolate 1 | non-essential | heat shock protein Hsp33                                                                  | 4.16   |
| b3401 | hslO | Isolate 2 | non-essential | heat shock protein Hsp33                                                                  | 0.50   |
| b3402 | yhgE | Isolate 1 | non-essential | predicted inner membrane protein                                                          | -0.58  |
| b3402 | yhgE | Isolate 2 | non-essential | predicted inner membrane protein                                                          | -0.16  |
| b3403 | pck  | Isolate 1 | non-essential | phosphoenolpyruvate carboxykinase                                                         | -0.42  |
| b3403 | pck  | Isolate 2 | non-essential | phosphoenolpyruvate carboxykinase                                                         | 1.77   |
| b3404 | envZ | Isolate 1 | non-essential | sensory histidine kinase in two-component regulatory system with OmpR                     | -0.79  |
| b3404 | envZ | Isolate 2 | non-essential | sensory histidine kinase in two-component regulatory system with OmpR                     | -1.57  |
| b3405 | ompR | Isolate 1 | non-essential | DNA-binding response regulator in two-component regulatory system with EnvZ               | -1.10  |
| b3405 | ompR | Isolate 2 | non-essential | DNA-binding response regulator in two-component regulatory system with EnvZ               | -2.00  |
| b3406 | greB | Isolate 1 | non-essential | transcription elongation factor                                                           | 3.20   |
| b3406 | greB | Isolate 2 | non-essential | transcription elongation factor                                                           | 2.25   |
| b3407 | yhgF | Isolate 1 | non-essential | predicted transcriptional accessory protein                                               | 6.18   |
| b3407 | yhgF | Isolate 2 | non-essential | predicted transcriptional accessory protein                                               | 1.68   |
| b3408 | feoA | Isolate 1 | non-essential | ferrous iron transporter, protein A                                                       | -0.88  |
| b3408 | feoA | Isolate 2 | non-essential | ferrous iron transporter, protein A                                                       | -1.94  |
| b3409 | feoB | Isolate 1 | non-essential | fused ferrous iron transporter, protein B                                                 | -0.52  |
| b3409 | feoB | Isolate 2 | non-essential | fused ferrous iron transporter, protein B                                                 | 2.37   |
| b3410 | yhgG | Isolate 1 | non-essential | predicted DNA-binding transcriptional regulator                                           | -0.88  |
| b3410 | yhgG | Isolate 2 | non-essential | predicted DNA-binding transcriptional regulator                                           | -1.76  |
| b3411 | yhgA | Isolate 1 | non-essential | predicted transposase                                                                     | -2.03  |
| b3411 | yhgA | Isolate 2 | non-essential | predicted transposase                                                                     | -0.23  |
| b3412 | bioH | Isolate 1 | non-essential | carboxylesterase of pimeloyl-CoA synthesis                                                | 1.23   |
| b3412 | bioH | Isolate 2 | non-essential | carboxylesterase of pimeloyl-CoA synthesis                                                | 0.57   |
| b3413 | gntX | Isolate 1 | non-essential | gluconate periplasmic binding protein with phosphoribosyltransferase domain, GNT I system | -11.62 |
| b3413 | gntX | Isolate 2 | non-essential | gluconate periplasmic binding protein with phosphoribosyltransferase domain, GNT I system | 1.75   |
| b3414 | gntY | Isolate 1 | non-essential | predicted gluconate transport associated protein                                          | -0.90  |
| b3414 | gntY | Isolate 2 | non-essential | predicted gluconate transport associated protein                                          | -0.54  |
| b3415 | gntT | Isolate 1 | non-essential | gluconate transporter, high-affinity GNT I system                                         | 0.17   |
| b3415 | gntT | Isolate 2 | non-essential | gluconate transporter, high-affinity GNT I system                                         | -0.15  |
| b3416 | malQ | Isolate 1 | non-essential | 4-alpha-glucanotransferase (amylomaltase)                                                 | 0.21   |

|       |      |           |               |                                                                    |       |
|-------|------|-----------|---------------|--------------------------------------------------------------------|-------|
| b3416 | malQ | Isolate 2 | non-essential | 4-alpha-glucanotransferase (amylomaltase)                          | 3.12  |
| b3417 | malP | Isolate 1 | non-essential | maltodextrin phosphorylase                                         | -1.59 |
| b3417 | malP | Isolate 2 | non-essential | maltodextrin phosphorylase                                         | 1.44  |
| b3418 | malT | Isolate 1 | non-essential | DNA-binding transcriptional activator, maltotriose-ATP-binding     | -0.96 |
| b3418 | malT | Isolate 2 | non-essential | DNA-binding transcriptional activator, maltotriose-ATP-binding     | -1.43 |
| b3421 | rtcB | Isolate 1 | non-essential | conserved protein                                                  | -0.92 |
| b3421 | rtcB | Isolate 2 | non-essential | conserved protein                                                  | 0.76  |
| b3422 | rtcR | Isolate 1 | non-essential | sigma 54-dependent transcriptional regulator of rtcBA expression   | -0.25 |
| b3422 | rtcR | Isolate 2 | non-essential | sigma 54-dependent transcriptional regulator of rtcBA expression   | 0.76  |
| b3423 | glpR | Isolate 1 | non-essential | DNA-binding transcriptional repressor                              | 0.41  |
| b3423 | glpR | Isolate 2 | non-essential | DNA-binding transcriptional repressor                              | 0.61  |
| b3424 | glpG | Isolate 1 | non-essential | predicted intramembrane serine protease                            | 1.60  |
| b3424 | glpG | Isolate 2 | non-essential | predicted intramembrane serine protease                            | 0.01  |
| b3425 | glpE | Isolate 1 | non-essential | thiosulfate:cyanide sulfurtransferase (rhodanese)                  | -1.65 |
| b3425 | glpE | Isolate 2 | non-essential | thiosulfate:cyanide sulfurtransferase (rhodanese)                  | 0.14  |
| b3426 | glpD | Isolate 1 | non-essential | sn-glycerol-3-phosphate dehydrogenase, aerobic, FAD/NAD(P)-binding | -1.70 |
| b3426 | glpD | Isolate 2 | non-essential | sn-glycerol-3-phosphate dehydrogenase, aerobic, FAD/NAD(P)-binding | -0.67 |
| b3427 | yzgL | Isolate 1 | non-essential | predicted protein                                                  | 0.81  |
| b3427 | yzgL | Isolate 2 | non-essential | predicted protein                                                  | -0.48 |
| b3428 | glgP | Isolate 1 | non-essential | glycogen phosphorylase                                             | -0.55 |
| b3428 | glgP | Isolate 2 | non-essential | glycogen phosphorylase                                             | 0.35  |
| b3429 | glgA | Isolate 1 | non-essential | glycogen synthase                                                  | -1.70 |
| b3429 | glgA | Isolate 2 | non-essential | glycogen synthase                                                  | 0.04  |
| b3430 | glgC | Isolate 1 | non-essential | glucose-1-phosphate adenylyltransferase                            | -1.69 |
| b3430 | glgC | Isolate 2 | non-essential | glucose-1-phosphate adenylyltransferase                            | -1.34 |
| b3431 | glgX | Isolate 1 | non-essential | glycogen debranching enzyme                                        | -0.64 |
| b3431 | glgX | Isolate 2 | non-essential | glycogen debranching enzyme                                        | 0.35  |
| b3432 | glgB | Isolate 1 | non-essential | 1,4-alpha-glucan branching enzyme                                  | -1.90 |
| b3432 | glgB | Isolate 2 | non-essential | 1,4-alpha-glucan branching enzyme                                  | 0.65  |
| b3434 | yhgN | Isolate 1 | non-essential | predicted antibiotic transporter                                   | -0.04 |
| b3434 | yhgN | Isolate 2 | non-essential | predicted antibiotic transporter                                   | 0.01  |
| b3437 | gntK | Isolate 1 | non-essential | gluconate kinase 2 -!- gluconate transport, GNT I system           | 0.86  |
| b3437 | gntK | Isolate 2 | non-essential | gluconate kinase 2 -!- gluconate transport, GNT I system           | -1.57 |
| b3438 | gntR | Isolate 1 | non-essential | DNA-binding transcriptional repressor                              | -0.51 |
| b3438 | gntR | Isolate 2 | non-essential | DNA-binding transcriptional repressor                              | 1.32  |
| b3439 | yhhW | Isolate 1 | non-essential | predicted protein                                                  | -0.57 |
| b3439 | yhhW | Isolate 2 | non-essential | predicted protein                                                  | 1.41  |
| b3440 | yhhX | Isolate 1 | non-essential | predicted oxidoreductase with NAD(P)-binding Rossmann-fold domain  | 0.08  |
| b3440 | yhhX | Isolate 2 | non-essential | predicted oxidoreductase with NAD(P)-binding Rossmann-fold domain  | 1.66  |
| b3441 | yhhY | Isolate 1 | non-essential | predicted acetyltransferase                                        | 0.70  |
| b3441 | yhhY | Isolate 2 | non-essential | predicted acetyltransferase                                        | -0.43 |
| b3442 | yhhZ | Isolate 1 | non-essential | conserved protein                                                  | 0.91  |
| b3442 | yhhZ | Isolate 2 | non-essential | conserved protein                                                  | -1.89 |

|         |      |           |               |                                                                                                    |       |
|---------|------|-----------|---------------|----------------------------------------------------------------------------------------------------|-------|
| b3443   | yrhA | Isolate 1 | non-essential | conserved protein                                                                                  | -1.55 |
| b3443   | yrhA | Isolate 2 | non-essential | conserved protein                                                                                  | 0.43  |
| b3445.1 | *    | Isolate 1 | *             | *                                                                                                  | 1.45  |
| b3445.1 | *    | Isolate 2 | *             | *                                                                                                  | 1.10  |
| b3446   | yrhB | Isolate 1 | non-essential | predicted protein                                                                                  | 2.53  |
| b3446   | yrhB | Isolate 2 | non-essential | predicted protein                                                                                  | 0.06  |
| b3447   | ggt  | Isolate 1 | non-essential | gamma-glutamyltranspeptidase                                                                       | 1.77  |
| b3447   | ggt  | Isolate 2 | non-essential | gamma-glutamyltranspeptidase                                                                       | -0.63 |
| b3448   | yhhA | Isolate 1 | non-essential | conserved protein                                                                                  | -0.22 |
| b3448   | yhhA | Isolate 2 | non-essential | conserved protein                                                                                  | -0.30 |
| b3449   | ugpQ | Isolate 1 | non-essential | glycerophosphodiester phosphodiesterase, cytosolic                                                 | 1.22  |
| b3449   | ugpQ | Isolate 2 | non-essential | glycerophosphodiester phosphodiesterase, cytosolic                                                 | -2.00 |
| b3450   | ugpC | Isolate 1 | non-essential | glycerol-3-phosphate transporter subunit -!- ATP-binding component of ABC superfamily              | -0.75 |
| b3450   | ugpC | Isolate 2 | non-essential | glycerol-3-phosphate transporter subunit -!- ATP-binding component of ABC superfamily              | 0.32  |
| b3451   | ugpE | Isolate 1 | non-essential | glycerol-3-phosphate transporter subunit -!- membrane component of ABC superfamily                 | -2.07 |
| b3451   | ugpE | Isolate 2 | non-essential | glycerol-3-phosphate transporter subunit -!- membrane component of ABC superfamily                 | -0.04 |
| b3452   | ugpA | Isolate 1 | non-essential | glycerol-3-phosphate transporter subunit -!- membrane component of ABC superfamily                 | 0.04  |
| b3452   | ugpA | Isolate 2 | non-essential | glycerol-3-phosphate transporter subunit -!- membrane component of ABC superfamily                 | -1.73 |
| b3453   | ugpB | Isolate 1 | non-essential | glycerol-3-phosphate transporter subunit -!- periplasmic-binding component of ABC superfamily      | 1.63  |
| b3453   | ugpB | Isolate 2 | non-essential | glycerol-3-phosphate transporter subunit -!- periplasmic-binding component of ABC superfamily      | 4.98  |
| b3454   | livF | Isolate 1 | non-essential | leucine/isoleucine/valine transporter subunit -!- ATP-binding component of ABC superfamily         | 1.01  |
| b3454   | livF | Isolate 2 | non-essential | leucine/isoleucine/valine transporter subunit -!- ATP-binding component of ABC superfamily         | -0.29 |
| b3455   | livG | Isolate 1 | non-essential | leucine/isoleucine/valine transporter subunit -!- ATP-binding component of ABC superfamily         | 0.96  |
| b3455   | livG | Isolate 2 | non-essential | leucine/isoleucine/valine transporter subunit -!- ATP-binding component of ABC superfamily         | 2.09  |
| b3456   | livM | Isolate 1 | non-essential | leucine/isoleucine/valine transporter subunit -!- membrane component of ABC superfamily            | 3.10  |
| b3456   | livM | Isolate 2 | non-essential | leucine/isoleucine/valine transporter subunit -!- membrane component of ABC superfamily            | 2.47  |
| b3457   | livH | Isolate 1 | non-essential | leucine/isoleucine/valine transporter subunit -!- membrane component of ABC superfamily            | -1.44 |
| b3457   | livH | Isolate 2 | non-essential | leucine/isoleucine/valine transporter subunit -!- membrane component of ABC superfamily            | -0.87 |
| b3458   | livK | Isolate 1 | non-essential | leucine transporter subunit -!- periplasmic-binding component of ABC superfamily                   | -0.37 |
| b3458   | livK | Isolate 2 | non-essential | leucine transporter subunit -!- periplasmic-binding component of ABC superfamily                   | -0.01 |
| b3459   | yhhK | Isolate 1 | non-essential | conserved protein                                                                                  | 0.22  |
| b3459   | yhhK | Isolate 2 | non-essential | conserved protein                                                                                  | -0.57 |
| b3460   | livJ | Isolate 1 | non-essential | leucine/isoleucine/valine transporter subunit -!- periplasmic-binding component of ABC superfamily | -0.01 |
| b3460   | livJ | Isolate 2 | non-essential | leucine/isoleucine/valine transporter subunit -!- periplasmic-binding component of ABC superfamily | 0.99  |
| b3461   | rpoH | Isolate 1 | essential     | RNA polymerase, sigma 32 (sigma H) factor                                                          | -0.56 |
| b3462   | ftsX | Isolate 1 | essential     | predicted transporter subunit -!- membrane component of ABC superfamily                            | -0.24 |
| b3463   | ftsE | Isolate 1 | essential     | predicted transporter subunit -!- ATP-binding component of ABC superfamily                         | 0.38  |
| b3465   | yhhF | Isolate 1 | non-essential | predicted methyltransferase                                                                        | -0.17 |
| b3465   | yhhF | Isolate 2 | non-essential | predicted methyltransferase                                                                        | -0.35 |
| b3466   | yhhL | Isolate 1 | non-essential | conserved inner membrane protein                                                                   | 1.82  |
| b3466   | yhhL | Isolate 2 | non-essential | conserved inner membrane protein                                                                   | 2.14  |
| b3467   | yhhM | Isolate 1 | non-essential | conserved protein                                                                                  | -1.68 |
| b3467   | yhhM | Isolate 2 | non-essential | conserved protein                                                                                  | 1.23  |

|       |      |           |               |                                                                                 |       |
|-------|------|-----------|---------------|---------------------------------------------------------------------------------|-------|
| b3468 | yhhN | Isolate 1 | non-essential | conserved inner membrane protein                                                | 1.83  |
| b3468 | yhhN | Isolate 2 | non-essential | conserved inner membrane protein                                                | -0.53 |
| b3469 | zntA | Isolate 1 | non-essential | zinc, cobalt and lead efflux system                                             | -0.34 |
| b3469 | zntA | Isolate 2 | non-essential | zinc, cobalt and lead efflux system                                             | -0.35 |
| b3470 | yhhP | Isolate 1 | non-essential | conserved protein required for cell growth                                      | 0.04  |
| b3470 | yhhP | Isolate 2 | non-essential | conserved protein required for cell growth                                      | 0.04  |
| b3472 | dcrB | Isolate 1 | non-essential | periplasmic protein                                                             | 1.64  |
| b3472 | dcrB | Isolate 2 | non-essential | periplasmic protein                                                             | 2.03  |
| b3473 | yhhS | Isolate 1 | non-essential | predicted transporter                                                           | -0.48 |
| b3473 | yhhS | Isolate 2 | non-essential | predicted transporter                                                           | 0.61  |
| b3474 | yhhT | Isolate 1 | non-essential | predicted inner membrane protein                                                | 1.47  |
| b3474 | yhhT | Isolate 2 | non-essential | predicted inner membrane protein                                                | -0.53 |
| b3475 | acpT | Isolate 1 | non-essential | holo-(acyl carrier protein) synthase 2                                          | 2.31  |
| b3475 | acpT | Isolate 2 | non-essential | holo-(acyl carrier protein) synthase 2                                          | 2.81  |
| b3476 | nikA | Isolate 1 | non-essential | nickel transporter subunit -!- periplasmic-binding component of ABC superfamily | 2.39  |
| b3476 | nikA | Isolate 2 | non-essential | nickel transporter subunit -!- periplasmic-binding component of ABC superfamily | 0.86  |
| b3477 | nikB | Isolate 1 | non-essential | nickel transporter subunit -!- membrane component of ABC superfamily            | -1.02 |
| b3477 | nikB | Isolate 2 | non-essential | nickel transporter subunit -!- membrane component of ABC superfamily            | -1.50 |
| b3478 | nikC | Isolate 1 | non-essential | nickel transporter subunit -!- membrane component of ABC superfamily            | 0.66  |
| b3478 | nikC | Isolate 2 | non-essential | nickel transporter subunit -!- membrane component of ABC superfamily            | 2.08  |
| b3479 | nikD | Isolate 1 | non-essential | nickel transporter subunit -!- ATP-binding component of ABC superfamily         | 1.86  |
| b3479 | nikD | Isolate 2 | non-essential | nickel transporter subunit -!- ATP-binding component of ABC superfamily         | -1.44 |
| b3480 | nikE | Isolate 1 | non-essential | nickel transporter subunit -!- ATP-binding component of ABC superfamily         | -1.91 |
| b3480 | nikE | Isolate 2 | non-essential | nickel transporter subunit -!- ATP-binding component of ABC superfamily         | 0.28  |
| b3481 | nikR | Isolate 1 | non-essential | DNA-binding transcriptional regulator, Ni-binding                               | -0.93 |
| b3481 | nikR | Isolate 2 | non-essential | DNA-binding transcriptional regulator, Ni-binding                               | 0.71  |
| b3482 | rhsB | Isolate 1 | non-essential | rhsB element core protein RshB                                                  | -0.38 |
| b3482 | rhsB | Isolate 2 | non-essential | rhsB element core protein RshB                                                  | -0.74 |
| b3483 | yhhH | Isolate 1 | non-essential | predicted protein                                                               | 0.65  |
| b3483 | yhhH | Isolate 2 | non-essential | predicted protein                                                               | -2.12 |
| b3484 | yhhI | Isolate 1 | non-essential | predicted transposase                                                           | -0.05 |
| b3484 | yhhI | Isolate 2 | non-essential | predicted transposase                                                           | 1.39  |
| b3485 | yhhJ | Isolate 1 | non-essential | predicted transporter subunit -!- membrane component of ABC superfamily         | 3.36  |
| b3485 | yhhJ | Isolate 2 | non-essential | predicted transporter subunit -!- membrane component of ABC superfamily         | 2.61  |
| b3486 | rbbA | Isolate 1 | non-essential | fused ribosome-associated ATPases                                               | 0.99  |
| b3486 | rbbA | Isolate 2 | non-essential | fused ribosome-associated ATPases                                               | 3.18  |
| b3487 | yhiI | Isolate 1 | non-essential | predicted HlyD family secretion protein                                         | -0.58 |
| b3487 | yhiI | Isolate 2 | non-essential | predicted HlyD family secretion protein                                         | 1.00  |
| b3488 | yhiJ | Isolate 1 | non-essential | predicted protein                                                               | 0.50  |
| b3488 | yhiJ | Isolate 2 | non-essential | predicted protein                                                               | 1.58  |
| b3489 | yhiK | Isolate 1 | *             | predicted protein (pseudogene)                                                  | 2.53  |
| b3489 | yhiK | Isolate 2 | *             | predicted protein (pseudogene)                                                  | 1.68  |
| b3490 | yhiL | Isolate 1 | non-essential | predicted protein                                                               | 0.96  |



|       |      |           |               |                                                          |       |
|-------|------|-----------|---------------|----------------------------------------------------------|-------|
| b3490 | yhiL | Isolate 2 | non-essential | predicted protein                                        | -0.38 |
| b3491 | yhiM | Isolate 1 | non-essential | conserved inner membrane protein                         | 1.30  |
| b3491 | yhiM | Isolate 2 | non-essential | conserved inner membrane protein                         | -1.17 |
| b3492 | yhiN | Isolate 1 | non-essential | predicted oxidoreductase, FAD/NAD(P)-binding domain      | 1.27  |
| b3492 | yhiN | Isolate 2 | non-essential | predicted oxidoreductase, FAD/NAD(P)-binding domain      | 0.21  |
| b3493 | pitA | Isolate 1 | non-essential | phosphate transporter, low-affinity                      | 0.33  |
| b3493 | pitA | Isolate 2 | non-essential | phosphate transporter, low-affinity                      | 0.10  |
| b3494 | yhiO | Isolate 1 | non-essential | predicted universal stress (ethanol tolerance) protein B | 1.25  |
| b3494 | yhiO | Isolate 2 | non-essential | predicted universal stress (ethanol tolerance) protein B | 0.67  |
| b3495 | uspA | Isolate 1 | non-essential | universal stress global response regulator               | 1.68  |
| b3495 | uspA | Isolate 2 | non-essential | universal stress global response regulator               | 1.25  |
| b3496 | yhiP | Isolate 1 | non-essential | predicted transporter                                    | -0.10 |
| b3496 | yhiP | Isolate 2 | non-essential | predicted transporter                                    | 0.21  |
| b3497 | yhiQ | Isolate 1 | non-essential | predicted SAM-dependent methyltransferase                | 1.32  |
| b3497 | yhiQ | Isolate 2 | non-essential | predicted SAM-dependent methyltransferase                | 0.68  |
| b3498 | prlC | Isolate 1 | non-essential | oligopeptidase A                                         | 0.40  |
| b3498 | prlC | Isolate 2 | non-essential | oligopeptidase A                                         | -1.07 |
| b3499 | yhiR | Isolate 1 | non-essential | predicted DNA (exogenous) processing protein             | 0.03  |
| b3499 | yhiR | Isolate 2 | non-essential | predicted DNA (exogenous) processing protein             | 0.05  |
| b3500 | gor  | Isolate 1 | non-essential | glutathione oxidoreductase                               | 0.43  |
| b3500 | gor  | Isolate 2 | non-essential | glutathione oxidoreductase                               | -2.56 |
| b3501 | arsR | Isolate 1 | non-essential | DNA-binding transcriptional regulator                    | -0.42 |
| b3501 | arsR | Isolate 2 | non-essential | DNA-binding transcriptional regulator                    | -1.41 |
| b3502 | arsB | Isolate 1 | non-essential | arsenite/antimonite transporter                          | 0.90  |
| b3502 | arsB | Isolate 2 | non-essential | arsenite/antimonite transporter                          | -0.21 |
| b3503 | arsC | Isolate 1 | non-essential | arsenate reductase                                       | -1.65 |
| b3503 | arsC | Isolate 2 | non-essential | arsenate reductase                                       | 0.92  |
| b3504 | yhiS | Isolate 1 | non-essential | predicted protein                                        | 0.10  |
| b3504 | yhiS | Isolate 2 | non-essential | predicted protein                                        | -3.01 |
| b3506 | slp  | Isolate 1 | non-essential | outer membrane lipoprotein                               | -1.96 |
| b3506 | slp  | Isolate 2 | non-essential | outer membrane lipoprotein                               | -3.16 |
| b3507 | yhiF | Isolate 1 | non-essential | predicted DNA-binding transcriptional regulator          | 0.10  |
| b3507 | yhiF | Isolate 2 | non-essential | predicted DNA-binding transcriptional regulator          | -1.22 |
| b3508 | yhiD | Isolate 1 | non-essential | predicted Mg(2+) transport ATPase inner membrane protein | -0.12 |
| b3508 | yhiD | Isolate 2 | non-essential | predicted Mg(2+) transport ATPase inner membrane protein | 1.19  |
| b3509 | hdeB | Isolate 1 | non-essential | acid-resistance protein                                  | 0.18  |
| b3509 | hdeB | Isolate 2 | non-essential | acid-resistance protein                                  | 0.59  |
| b3510 | hdeA | Isolate 1 | non-essential | stress response protein acid-resistance protein          | -0.72 |
| b3510 | hdeA | Isolate 2 | non-essential | stress response protein acid-resistance protein          | -0.49 |
| b3511 | hdeD | Isolate 1 | non-essential | acid-resistance membrane protein                         | -0.13 |
| b3511 | hdeD | Isolate 2 | non-essential | acid-resistance membrane protein                         | 2.09  |
| b3512 | gadE | Isolate 1 | non-essential | DNA-binding transcriptional activator                    | 0.73  |
| b3512 | gadE | Isolate 2 | non-essential | DNA-binding transcriptional activator                    | 0.91  |

|       |      |           |               |                                                                             |       |
|-------|------|-----------|---------------|-----------------------------------------------------------------------------|-------|
| b3513 | mdtE | Isolate 1 | non-essential | multidrug resistance efflux transporter                                     | 0.31  |
| b3513 | mdtE | Isolate 2 | non-essential | multidrug resistance efflux transporter                                     | -2.35 |
| b3514 | mdtF | Isolate 1 | non-essential | multidrug transporter, RpoS-dependent                                       | 0.04  |
| b3514 | mdtF | Isolate 2 | non-essential | multidrug transporter, RpoS-dependent                                       | 2.00  |
| b3515 | gadW | Isolate 1 | non-essential | DNA-binding transcriptional activator                                       | 0.01  |
| b3515 | gadW | Isolate 2 | non-essential | DNA-binding transcriptional activator                                       | -0.26 |
| b3516 | gadX | Isolate 1 | non-essential | DNA-binding transcriptional dual regulator                                  | -0.86 |
| b3516 | gadX | Isolate 2 | non-essential | DNA-binding transcriptional dual regulator                                  | -0.32 |
| b3517 | gadA | Isolate 1 | non-essential | glutamate decarboxylase A, PLP-dependent                                    | 4.93  |
| b3517 | gadA | Isolate 2 | non-essential | glutamate decarboxylase A, PLP-dependent                                    | 0.75  |
| b3518 | yhjA | Isolate 1 | non-essential | predicted cytochrome C peroxidase                                           | 0.67  |
| b3518 | yhjA | Isolate 2 | non-essential | predicted cytochrome C peroxidase                                           | 0.33  |
| b3519 | treF | Isolate 1 | non-essential | cytoplasmic trehalase                                                       | -1.86 |
| b3519 | treF | Isolate 2 | non-essential | cytoplasmic trehalase                                                       | 2.10  |
| b3520 | yhjB | Isolate 1 | non-essential | predicted DNA-binding response regulator in two-component regulatory system | 0.93  |
| b3520 | yhjB | Isolate 2 | non-essential | predicted DNA-binding response regulator in two-component regulatory system | 0.46  |
| b3521 | yhjC | Isolate 1 | non-essential | predicted DNA-binding transcriptional regulator                             | -2.05 |
| b3521 | yhjC | Isolate 2 | non-essential | predicted DNA-binding transcriptional regulator                             | -0.95 |
| b3522 | yhjD | Isolate 1 | non-essential | conserved inner membrane protein                                            | -0.56 |
| b3522 | yhjD | Isolate 2 | non-essential | conserved inner membrane protein                                            | 0.70  |
| b3523 | yhjE | Isolate 1 | non-essential | predicted transporter                                                       | 1.50  |
| b3523 | yhjE | Isolate 2 | non-essential | predicted transporter                                                       | -0.96 |
| b3524 | yhjG | Isolate 1 | non-essential | predicted outer membrane biogenesis protein                                 | 0.54  |
| b3524 | yhjG | Isolate 2 | non-essential | predicted outer membrane biogenesis protein                                 | 0.61  |
| b3525 | yhjH | Isolate 1 | non-essential | EAL domain containing protein involved in flagellar function                | 2.35  |
| b3525 | yhjH | Isolate 2 | non-essential | EAL domain containing protein involved in flagellar function                | 1.15  |
| b3526 | kdgK | Isolate 1 | non-essential | ketodeoxygluconokinase                                                      | 0.58  |
| b3526 | kdgK | Isolate 2 | non-essential | ketodeoxygluconokinase                                                      | 0.87  |
| b3527 | yhjJ | Isolate 1 | non-essential | predicted zinc-dependent peptidase                                          | 1.41  |
| b3527 | yhjJ | Isolate 2 | non-essential | predicted zinc-dependent peptidase                                          | -0.58 |
| b3528 | dctA | Isolate 1 | non-essential | C4-dicarboxylic acid, orotate and citrate transporter                       | 1.60  |
| b3528 | dctA | Isolate 2 | non-essential | C4-dicarboxylic acid, orotate and citrate transporter                       | 0.69  |
| b3529 | yhjK | Isolate 1 | non-essential | predicted diguanylate cyclase                                               | 1.28  |
| b3529 | yhjK | Isolate 2 | non-essential | predicted diguanylate cyclase                                               | -0.65 |
| b3530 | bcsC | Isolate 1 | non-essential | cellulose synthase subunit                                                  | 0.10  |
| b3530 | bcsC | Isolate 2 | non-essential | cellulose synthase subunit                                                  | -0.99 |
| b3531 | bcsZ | Isolate 1 | non-essential | endo-1,4-D-glucanase                                                        | 2.54  |
| b3531 | bcsZ | Isolate 2 | non-essential | endo-1,4-D-glucanase                                                        | 1.77  |
| b3533 | bcsA | Isolate 1 | non-essential | cellulose synthase, catalytic subunit                                       | 0.73  |
| b3533 | bcsA | Isolate 2 | non-essential | cellulose synthase, catalytic subunit                                       | 0.54  |
| b3534 | yhjQ | Isolate 1 | *             | cell division protein (chromosome partitioning ATPase) (pseudogene)         | 0.52  |
| b3534 | yhjQ | Isolate 2 | *             | cell division protein (chromosome partitioning ATPase) (pseudogene)         | 0.40  |
| b3535 | yhjR | Isolate 1 | non-essential | conserved protein                                                           | -0.51 |

|       |      |           |               |                                                                                |       |
|-------|------|-----------|---------------|--------------------------------------------------------------------------------|-------|
| b3535 | yhjR | Isolate 2 | non-essential | conserved protein                                                              | 0.02  |
| b3536 | bcsE | Isolate 1 | non-essential | conserved protein                                                              | -1.37 |
| b3536 | bcsE | Isolate 2 | non-essential | conserved protein                                                              | -0.93 |
| b3537 | bcsF | Isolate 1 | non-essential | predicted protein                                                              | -1.03 |
| b3537 | bcsF | Isolate 2 | non-essential | predicted protein                                                              | -0.54 |
| b3538 | bcsG | Isolate 1 | non-essential | predicted inner membrane protein                                               | 1.63  |
| b3538 | bcsG | Isolate 2 | non-essential | predicted inner membrane protein                                               | 0.11  |
| b3539 | yhjV | Isolate 1 | non-essential | predicted transporter                                                          | 0.62  |
| b3539 | yhjV | Isolate 2 | non-essential | predicted transporter                                                          | -0.18 |
| b3540 | dppF | Isolate 1 | non-essential | dipeptide transporter -!- ATP-binding component of ABC superfamily             | 0.81  |
| b3540 | dppF | Isolate 2 | non-essential | dipeptide transporter -!- ATP-binding component of ABC superfamily             | -1.10 |
| b3541 | dppD | Isolate 1 | non-essential | dipeptide transporter -!- ATP-binding component of ABC superfamily             | 0.79  |
| b3541 | dppD | Isolate 2 | non-essential | dipeptide transporter -!- ATP-binding component of ABC superfamily             | 0.06  |
| b3542 | dppC | Isolate 1 | non-essential | dipeptide transporter -!- membrane component of ABC superfamily                | 0.66  |
| b3542 | dppC | Isolate 2 | non-essential | dipeptide transporter -!- membrane component of ABC superfamily                | -1.51 |
| b3543 | dppB | Isolate 1 | non-essential | dipeptide transporter-!- membrane component of ABC superfamily                 | 4.21  |
| b3543 | dppB | Isolate 2 | non-essential | dipeptide transporter-!- membrane component of ABC superfamily                 | 1.44  |
| b3544 | dppA | Isolate 1 | non-essential | dipeptide transporter -!- periplasmic-binding component of ABC superfamily     | 2.24  |
| b3544 | dppA | Isolate 2 | non-essential | dipeptide transporter -!- periplasmic-binding component of ABC superfamily     | -0.49 |
| b3546 | eptB | Isolate 1 | non-essential | predicted metal dependent hydrolase                                            | 0.50  |
| b3546 | eptB | Isolate 2 | non-essential | predicted metal dependent hydrolase                                            | -0.39 |
| b3547 | yhjX | Isolate 1 | non-essential | predicted transporter                                                          | 0.64  |
| b3547 | yhjX | Isolate 2 | non-essential | predicted transporter                                                          | -0.74 |
| b3548 | yhjY | Isolate 1 | non-essential | conserved protein                                                              | 1.06  |
| b3548 | yhjY | Isolate 2 | non-essential | conserved protein                                                              | 1.48  |
| b3549 | tag  | Isolate 1 | non-essential | 3-methyl-adenine DNA glycosylase I, constitutive                               | 0.13  |
| b3549 | tag  | Isolate 2 | non-essential | 3-methyl-adenine DNA glycosylase I, constitutive                               | -2.66 |
| b3550 | yiaC | Isolate 1 | non-essential | predicted acyltransferase with acyl-CoA N-acyltransferase domain               | 1.81  |
| b3550 | yiaC | Isolate 2 | non-essential | predicted acyltransferase with acyl-CoA N-acyltransferase domain               | -1.02 |
| b3551 | bisC | Isolate 1 | non-essential | biotin sulfoxide reductase                                                     | 0.24  |
| b3551 | bisC | Isolate 2 | non-essential | biotin sulfoxide reductase                                                     | 1.18  |
| b3552 | yiaD | Isolate 1 | non-essential | predicted outer membrane lipoprotien                                           | -0.08 |
| b3552 | yiaD | Isolate 2 | non-essential | predicted outer membrane lipoprotien                                           | -1.18 |
| b3553 | tiaE | Isolate 1 | non-essential | 2-keto-D-gluconate reductase (glyoxalate reductase) (2-ketoaldonate reductase) | 2.77  |
| b3553 | tiaE | Isolate 2 | non-essential | 2-keto-D-gluconate reductase (glyoxalate reductase) (2-ketoaldonate reductase) | 0.98  |
| b3554 | yiaF | Isolate 1 | non-essential | conserved protein                                                              | 0.39  |
| b3554 | yiaF | Isolate 2 | non-essential | conserved protein                                                              | -0.14 |
| b3555 | yiaG | Isolate 1 | non-essential | predicted transcriptional regulator                                            | -0.40 |
| b3555 | yiaG | Isolate 2 | non-essential | predicted transcriptional regulator                                            | -0.84 |
| b3556 | cspA | Isolate 1 | non-essential | major cold shock protein                                                       | 0.57  |
| b3556 | cspA | Isolate 2 | non-essential | major cold shock protein                                                       | 0.09  |
| b3559 | glyS | Isolate 1 | non-essential | glycine tRNA synthetase, beta subunit                                          | 0.88  |
| b3559 | glyS | Isolate 2 | non-essential | glycine tRNA synthetase, beta subunit                                          | 0.12  |

|       |      |           |               |                                                                                      |       |
|-------|------|-----------|---------------|--------------------------------------------------------------------------------------|-------|
| b3560 | glyQ | Isolate 1 | essential     | glycine tRNA synthetase, alpha subunit                                               | 3.08  |
| b3561 | yiaH | Isolate 1 | non-essential | conserved inner membrane protein                                                     | -0.37 |
| b3561 | yiaH | Isolate 2 | non-essential | conserved inner membrane protein                                                     | 0.86  |
| b3562 | yiaA | Isolate 1 | non-essential | conserved inner membrane protein                                                     | 0.83  |
| b3562 | yiaA | Isolate 2 | non-essential | conserved inner membrane protein                                                     | 1.22  |
| b3563 | yiaB | Isolate 1 | non-essential | conserved inner membrane protein                                                     | 0.34  |
| b3563 | yiaB | Isolate 2 | non-essential | conserved inner membrane protein                                                     | 0.33  |
| b3564 | xylB | Isolate 1 | non-essential | xylulokinase                                                                         | 0.53  |
| b3564 | xylB | Isolate 2 | non-essential | xylulokinase                                                                         | 0.56  |
| b3565 | xylA | Isolate 1 | non-essential | D-xylose isomerase                                                                   | -1.02 |
| b3565 | xylA | Isolate 2 | non-essential | D-xylose isomerase                                                                   | -1.53 |
| b3566 | xylF | Isolate 1 | non-essential | D-xylose transporter subunit -!- periplasmic-binding component of ABC superfamily    | 0.84  |
| b3566 | xylF | Isolate 2 | non-essential | D-xylose transporter subunit -!- periplasmic-binding component of ABC superfamily    | 0.20  |
| b3567 | xylG | Isolate 1 | non-essential | fused subunits of D-xylose transporter -!- ATP-binding components of ABC superfamily | 0.56  |
| b3567 | xylG | Isolate 2 | non-essential | fused subunits of D-xylose transporter -!- ATP-binding components of ABC superfamily | 1.92  |
| b3568 | xylH | Isolate 1 | non-essential | D-xylose transporter subunit -!- membrane component of ABC superfamily               | 2.17  |
| b3568 | xylH | Isolate 2 | non-essential | D-xylose transporter subunit -!- membrane component of ABC superfamily               | 0.19  |
| b3569 | xylR | Isolate 1 | non-essential | DNA-binding transcriptional activator, xylose-binding                                | -0.91 |
| b3569 | xylR | Isolate 2 | non-essential | DNA-binding transcriptional activator, xylose-binding                                | -3.54 |
| b3570 | bax  | Isolate 1 | non-essential | conserved protein                                                                    | -0.17 |
| b3570 | bax  | Isolate 2 | non-essential | conserved protein                                                                    | -0.11 |
| b3571 | malS | Isolate 1 | non-essential | alpha-amylase                                                                        | -1.20 |
| b3571 | malS | Isolate 2 | non-essential | alpha-amylase                                                                        | -1.30 |
| b3572 | avtA | Isolate 1 | non-essential | valine-pyruvate aminotransferase                                                     | -1.25 |
| b3572 | avtA | Isolate 2 | non-essential | valine-pyruvate aminotransferase                                                     | 1.02  |
| b3573 | yiaI | Isolate 1 | non-essential | predicted hydrogenase, 4Fe-4S ferredoxin-type component                              | -0.99 |
| b3573 | yiaI | Isolate 2 | non-essential | predicted hydrogenase, 4Fe-4S ferredoxin-type component                              | 0.69  |
| b3574 | yiaJ | Isolate 1 | non-essential | predicted DNA-binding transcriptional repressor                                      | 0.79  |
| b3574 | yiaJ | Isolate 2 | non-essential | predicted DNA-binding transcriptional repressor                                      | 0.36  |
| b3575 | yiaK | Isolate 1 | non-essential | 2,3-diketo-L-gulonate dehydrogenase, NADH-dependent                                  | -1.70 |
| b3575 | yiaK | Isolate 2 | non-essential | 2,3-diketo-L-gulonate dehydrogenase, NADH-dependent                                  | -0.84 |
| b3576 | yiaL | Isolate 1 | non-essential | conserved protein                                                                    | -0.68 |
| b3576 | yiaL | Isolate 2 | non-essential | conserved protein                                                                    | -0.93 |
| b3577 | yiaM | Isolate 1 | non-essential | predicted transporter                                                                | -1.04 |
| b3577 | yiaM | Isolate 2 | non-essential | predicted transporter                                                                | 0.29  |
| b3578 | yiaN | Isolate 1 | non-essential | predicted transporter                                                                | 1.24  |
| b3578 | yiaN | Isolate 2 | non-essential | predicted transporter                                                                | -0.15 |
| b3579 | yiaO | Isolate 1 | non-essential | predicted transporter                                                                | -0.30 |
| b3579 | yiaO | Isolate 2 | non-essential | predicted transporter                                                                | -1.23 |
| b3580 | lyxK | Isolate 1 | non-essential | L-xylulose kinase                                                                    | -1.29 |
| b3580 | lyxK | Isolate 2 | non-essential | L-xylulose kinase                                                                    | -0.25 |
| b3581 | sgbH | Isolate 1 | non-essential | 3-keto-L-gulonate 6-phosphate decarboxylase                                          | -1.31 |
| b3581 | sgbH | Isolate 2 | non-essential | 3-keto-L-gulonate 6-phosphate decarboxylase                                          | -2.10 |

|       |      |           |               |                                                                       |       |
|-------|------|-----------|---------------|-----------------------------------------------------------------------|-------|
| b3582 | sgbU | Isolate 1 | non-essential | predicted L-xylulose 5-phosphate 3-epimerase                          | -1.38 |
| b3582 | sgbU | Isolate 2 | non-essential | predicted L-xylulose 5-phosphate 3-epimerase                          | 0.74  |
| b3583 | sgbE | Isolate 1 | non-essential | L-ribulose-5-phosphate 4-epimerase                                    | -1.45 |
| b3583 | sgbE | Isolate 2 | non-essential | L-ribulose-5-phosphate 4-epimerase                                    | -2.24 |
| b3584 | yiaT | Isolate 1 | non-essential | predicted protein                                                     | -1.22 |
| b3584 | yiaT | Isolate 2 | non-essential | predicted protein                                                     | -0.66 |
| b3585 | yiaU | Isolate 1 | non-essential | predicted DNA-binding transcriptional regulator                       | 0.14  |
| b3585 | yiaU | Isolate 2 | non-essential | predicted DNA-binding transcriptional regulator                       | -2.60 |
| b3586 | yiaV | Isolate 1 | non-essential | membrane fusion protein (MFP) component of efflux pump, signal anchor | 0.41  |
| b3586 | yiaV | Isolate 2 | non-essential | membrane fusion protein (MFP) component of efflux pump, signal anchor | 1.00  |
| b3587 | yiaW | Isolate 1 | non-essential | conserved inner membrane protein                                      | 0.13  |
| b3587 | yiaW | Isolate 2 | non-essential | conserved inner membrane protein                                      | 0.57  |
| b3588 | aldB | Isolate 1 | non-essential | aldehyde dehydrogenase B                                              | 1.62  |
| b3588 | aldB | Isolate 2 | non-essential | aldehyde dehydrogenase B                                              | 0.92  |
| b3589 | yiaY | Isolate 1 | non-essential | predicted Fe-containing alcohol dehydrogenase                         | 0.51  |
| b3589 | yiaY | Isolate 2 | non-essential | predicted Fe-containing alcohol dehydrogenase                         | -0.56 |
| b3590 | selB | Isolate 1 | non-essential | selenocysteinyl-tRNA-specific translation factor                      | 0.23  |
| b3590 | selB | Isolate 2 | non-essential | selenocysteinyl-tRNA-specific translation factor                      | 0.74  |
| b3591 | selA | Isolate 1 | non-essential | selenocysteine synthase                                               | -0.12 |
| b3591 | selA | Isolate 2 | non-essential | selenocysteine synthase                                               | -0.28 |
| b3592 | yibF | Isolate 1 | non-essential | predicted glutathione S-transferase                                   | 0.04  |
| b3592 | yibF | Isolate 2 | non-essential | predicted glutathione S-transferase                                   | 0.34  |
| b3593 | rhsA | Isolate 1 | non-essential | rhsA element core protein RshA                                        | -1.63 |
| b3593 | rhsA | Isolate 2 | non-essential | rhsA element core protein RshA                                        | -1.04 |
| b3594 | yibA | Isolate 1 | non-essential | lyase containing HEAT-repeat                                          | -0.25 |
| b3594 | yibA | Isolate 2 | non-essential | lyase containing HEAT-repeat                                          | -0.14 |
| b3596 | yibG | Isolate 1 | non-essential | conserved protein                                                     | -0.75 |
| b3596 | yibG | Isolate 2 | non-essential | conserved protein                                                     | 1.04  |
| b3597 | yibH | Isolate 1 | non-essential | predicted protein                                                     | 1.29  |
| b3597 | yibH | Isolate 2 | non-essential | predicted protein                                                     | 1.37  |
| b3598 | yibI | Isolate 1 | non-essential | predicted inner membrane protein                                      | 0.26  |
| b3598 | yibI | Isolate 2 | non-essential | predicted inner membrane protein                                      | 1.00  |
| b3599 | mtlA | Isolate 1 | non-essential | fused mannitol-specific PTS enzyme IIABC components                   | 0.02  |
| b3599 | mtlA | Isolate 2 | non-essential | fused mannitol-specific PTS enzyme IIABC components                   | 1.92  |
| b3600 | mtlD | Isolate 1 | non-essential | mannitol-1-phosphate dehydrogenase, NAD(P)-binding                    | 0.56  |
| b3600 | mtlD | Isolate 2 | non-essential | mannitol-1-phosphate dehydrogenase, NAD(P)-binding                    | 1.44  |
| b3601 | mtlR | Isolate 1 | non-essential | DNA-binding transcriptional repressor                                 | -1.69 |
| b3601 | mtlR | Isolate 2 | non-essential | DNA-binding transcriptional repressor                                 | -1.09 |
| b3602 | yibL | Isolate 1 | non-essential | conserved protein                                                     | -0.92 |
| b3602 | yibL | Isolate 2 | non-essential | conserved protein                                                     | 0.51  |
| b3603 | lldP | Isolate 1 | non-essential | L-lactate permease                                                    | 0.10  |
| b3603 | lldP | Isolate 2 | non-essential | L-lactate permease                                                    | -0.92 |
| b3604 | lldR | Isolate 1 | non-essential | DNA-binding transcriptional repressor                                 | -1.21 |

|       |      |           |               |                                                                                |       |
|-------|------|-----------|---------------|--------------------------------------------------------------------------------|-------|
| b3604 | lldR | Isolate 2 | non-essential | DNA-binding transcriptional repressor                                          | -1.34 |
| b3605 | lldD | Isolate 1 | non-essential | L-lactate dehydrogenase, FMN-linked                                            | -1.14 |
| b3605 | lldD | Isolate 2 | non-essential | L-lactate dehydrogenase, FMN-linked                                            | -3.27 |
| b3606 | yibK | Isolate 1 | non-essential | predicted rRNA methylase                                                       | -0.56 |
| b3606 | yibK | Isolate 2 | non-essential | predicted rRNA methylase                                                       | 0.65  |
| b3607 | cysE | Isolate 1 | non-essential | serine acetyltransferase                                                       | -1.01 |
| b3607 | cysE | Isolate 2 | non-essential | serine acetyltransferase                                                       | -2.32 |
| b3609 | secB | Isolate 1 | non-essential | protein export chaperone                                                       | 3.64  |
| b3609 | secB | Isolate 2 | non-essential | protein export chaperone                                                       | -2.18 |
| b3610 | grxC | Isolate 1 | non-essential | glutaredoxin 3                                                                 | -0.28 |
| b3610 | grxC | Isolate 2 | non-essential | glutaredoxin 3                                                                 | 0.27  |
| b3611 | yibN | Isolate 1 | non-essential | predicted rhodanese-related sulfurtransferase                                  | -0.33 |
| b3611 | yibN | Isolate 2 | non-essential | predicted rhodanese-related sulfurtransferase                                  | -1.66 |
| b3612 | gpmI | Isolate 1 | non-essential | phosphoglycero mutase III, cofactor-independent                                | 0.77  |
| b3612 | gpmI | Isolate 2 | non-essential | phosphoglycero mutase III, cofactor-independent                                | 2.00  |
| b3613 | envC | Isolate 1 | non-essential | protease with a role in cell division                                          | -1.41 |
| b3613 | envC | Isolate 2 | non-essential | protease with a role in cell division                                          | -1.00 |
| b3614 | yibQ | Isolate 1 | non-essential | predicted polysaccharide deacetylase                                           | 0.79  |
| b3614 | yibQ | Isolate 2 | non-essential | predicted polysaccharide deacetylase                                           | -1.02 |
| b3615 | yibD | Isolate 1 | non-essential | predicted glycosyl transferase                                                 | -0.58 |
| b3615 | yibD | Isolate 2 | non-essential | predicted glycosyl transferase                                                 | 0.13  |
| b3616 | tdh  | Isolate 1 | non-essential | threonine 3-dehydrogenase, NAD(P)-binding                                      | -0.68 |
| b3616 | tdh  | Isolate 2 | non-essential | threonine 3-dehydrogenase, NAD(P)-binding                                      | 0.59  |
| b3617 | kbl  | Isolate 1 | non-essential | glycine C-acetyltransferase                                                    | 0.45  |
| b3617 | kbl  | Isolate 2 | non-essential | glycine C-acetyltransferase                                                    | -0.42 |
| b3618 | htrL | Isolate 1 | non-essential | predicted protein                                                              | -0.52 |
| b3618 | htrL | Isolate 2 | non-essential | predicted protein                                                              | -0.79 |
| b3619 | rfaD | Isolate 1 | non-essential | ADP-L-glycero-D-mannoheptose-6-epimerase, NAD(P)-binding                       | -5.45 |
| b3619 | rfaD | Isolate 2 | non-essential | ADP-L-glycero-D-mannoheptose-6-epimerase, NAD(P)-binding                       | -3.93 |
| b3620 | rfaF | Isolate 1 | non-essential | ADP-heptose:LPS heptosyltransferase II                                         | -2.76 |
| b3620 | rfaF | Isolate 2 | non-essential | ADP-heptose:LPS heptosyltransferase II                                         | -0.35 |
| b3621 | rfaC | Isolate 1 | non-essential | ADP-heptose:LPS heptosyl transferase I                                         | -2.95 |
| b3621 | rfaC | Isolate 2 | non-essential | ADP-heptose:LPS heptosyl transferase I                                         | -2.76 |
| b3622 | rfaL | Isolate 1 | non-essential | O-antigen ligase                                                               | -0.31 |
| b3622 | rfaL | Isolate 2 | non-essential | O-antigen ligase                                                               | 0.06  |
| b3624 | rfaZ | Isolate 1 | non-essential | lipopolysaccharide core biosynthesis protein                                   | -0.53 |
| b3624 | rfaZ | Isolate 2 | non-essential | lipopolysaccharide core biosynthesis protein                                   | 0.64  |
| b3625 | rfaY | Isolate 1 | non-essential | lipopolysaccharide core biosynthesis protein                                   | 1.10  |
| b3625 | rfaY | Isolate 2 | non-essential | lipopolysaccharide core biosynthesis protein                                   | -0.99 |
| b3626 | rfaJ | Isolate 1 | non-essential | UDP-D-glucose:(galactosyl)lipopolysaccharide glucosyltransferase               | -1.08 |
| b3626 | rfaJ | Isolate 2 | non-essential | UDP-D-glucose:(galactosyl)lipopolysaccharide glucosyltransferase               | -1.18 |
| b3627 | rfaI | Isolate 1 | non-essential | UDP-D-galactose:(glucosyl)lipopolysaccharide-alpha-1,3-D-galactosyltransferase | 2.00  |
| b3627 | rfaI | Isolate 2 | non-essential | UDP-D-galactose:(glucosyl)lipopolysaccharide-alpha-1,3-D-galactosyltransferase | 0.65  |

|       |      |           |               |                                                                                                   |       |
|-------|------|-----------|---------------|---------------------------------------------------------------------------------------------------|-------|
| b3628 | rfaB | Isolate 1 | non-essential | UDP-D-galactose:(glucosyl)lipopolysaccharide-1,6-D-galactosyltransferase                          | -0.13 |
| b3628 | rfaB | Isolate 2 | non-essential | UDP-D-galactose:(glucosyl)lipopolysaccharide-1,6-D-galactosyltransferase                          | 0.47  |
| b3629 | rfaS | Isolate 1 | non-essential | lipopolysaccharide core biosynthesis protein                                                      | 0.00  |
| b3629 | rfaS | Isolate 2 | non-essential | lipopolysaccharide core biosynthesis protein                                                      | 0.42  |
| b3630 | rfaP | Isolate 1 | non-essential | kinase that phosphorylates core heptose of lipopolysaccharide                                     | -3.79 |
| b3630 | rfaP | Isolate 2 | non-essential | kinase that phosphorylates core heptose of lipopolysaccharide                                     | 0.23  |
| b3631 | rfaG | Isolate 1 | non-essential | glucosyltransferase I                                                                             | 0.50  |
| b3631 | rfaG | Isolate 2 | non-essential | glucosyltransferase I                                                                             | 1.90  |
| b3632 | rfaQ | Isolate 1 | non-essential | lipopolysaccharide core biosynthesis protein                                                      | -0.11 |
| b3632 | rfaQ | Isolate 2 | non-essential | lipopolysaccharide core biosynthesis protein                                                      | 0.10  |
| b3633 | kdtA | Isolate 1 | essential     | 3-deoxy-D-manno-octulosonic-acid transferase (KDO transferase)                                    | 0.00  |
| b3634 | coaD | Isolate 1 | essential     | pantetheine-phosphate adenylyltransferase                                                         | 3.66  |
| b3635 | mutM | Isolate 1 | non-essential | formamidopyrimidine/5-formyluracil/ 5-hydroxymethyluracil DNA glycosylase                         | -0.84 |
| b3635 | mutM | Isolate 2 | non-essential | formamidopyrimidine/5-formyluracil/ 5-hydroxymethyluracil DNA glycosylase                         | -0.10 |
| b3636 | rpmG | Isolate 1 | non-essential | 50S ribosomal subunit protein L33                                                                 | -3.02 |
| b3636 | rpmG | Isolate 2 | non-essential | 50S ribosomal subunit protein L33                                                                 | 1.65  |
| b3638 | yicR | Isolate 1 | non-essential | protein associated with replication fork, possible DNA repair protein                             | 1.25  |
| b3638 | yicR | Isolate 2 | non-essential | protein associated with replication fork, possible DNA repair protein                             | 0.01  |
| b3640 | dut  | Isolate 1 | essential     | deoxyuridinetriphosphatase                                                                        | 1.40  |
| b3641 | ttk  | Isolate 1 | non-essential | division inhibitor                                                                                | -1.89 |
| b3641 | ttk  | Isolate 2 | non-essential | division inhibitor                                                                                | -0.92 |
| b3642 | pyrE | Isolate 1 | non-essential | orotate phosphoribosyltransferase                                                                 | -2.14 |
| b3642 | pyrE | Isolate 2 | non-essential | orotate phosphoribosyltransferase                                                                 | -0.95 |
| b3643 | rph  | Isolate 1 | *             | ribonuclease PH (pseudogene)                                                                      | 0.64  |
| b3643 | rph  | Isolate 2 | *             | ribonuclease PH (pseudogene)                                                                      | 0.58  |
| b3644 | yicC | Isolate 1 | non-essential | conserved protein                                                                                 | 1.86  |
| b3644 | yicC | Isolate 2 | non-essential | conserved protein                                                                                 | 0.73  |
| b3645 | dinD | Isolate 1 | non-essential | DNA-damage-inducible protein                                                                      | -0.49 |
| b3645 | dinD | Isolate 2 | non-essential | DNA-damage-inducible protein                                                                      | 3.07  |
| b3646 | yicG | Isolate 1 | non-essential | conserved inner membrane protein                                                                  | 0.39  |
| b3646 | yicG | Isolate 2 | non-essential | conserved inner membrane protein                                                                  | 1.95  |
| b3647 | ligB | Isolate 1 | non-essential | DNA ligase, NAD(+)-dependent                                                                      | 0.48  |
| b3647 | ligB | Isolate 2 | non-essential | DNA ligase, NAD(+)-dependent                                                                      | 0.96  |
| b3648 | gmk  | Isolate 1 | essential     | guanylate kinase                                                                                  | -0.01 |
| b3649 | rpoZ | Isolate 1 | non-essential | RNA polymerase, omega subunit                                                                     | -2.63 |
| b3649 | rpoZ | Isolate 2 | non-essential | RNA polymerase, omega subunit                                                                     | -0.73 |
| b3650 | spoT | Isolate 1 | essential     | bifunctional (p)ppGpp synthetase II -/- guanosine-3',5'-bis pyrophosphate 3'-pyrophosphohydrolase | -0.48 |
| b3651 | trmH | Isolate 1 | non-essential | tRNA (Guanosine-2'-O-)-methyltransferase                                                          | 0.00  |
| b3651 | trmH | Isolate 2 | non-essential | tRNA (Guanosine-2'-O-)-methyltransferase                                                          | -4.41 |
| b3652 | recG | Isolate 1 | non-essential | ATP-dependent DNA helicase                                                                        | 1.03  |
| b3652 | recG | Isolate 2 | non-essential | ATP-dependent DNA helicase                                                                        | -2.22 |
| b3653 | gltS | Isolate 1 | non-essential | glutamate transporter                                                                             | -0.52 |
| b3653 | gltS | Isolate 2 | non-essential | glutamate transporter                                                                             | 0.83  |

|       |      |           |               |                                                                             |       |
|-------|------|-----------|---------------|-----------------------------------------------------------------------------|-------|
| b3654 | yicE | Isolate 1 | non-essential | predicted transporter                                                       | -0.28 |
| b3654 | yicE | Isolate 2 | non-essential | predicted transporter                                                       | 0.65  |
| b3655 | yicH | Isolate 1 | non-essential | conserved protein                                                           | 0.14  |
| b3655 | yicH | Isolate 2 | non-essential | conserved protein                                                           | -0.86 |
| b3656 | yicI | Isolate 1 | non-essential | predicted alpha-glucosidase                                                 | 0.40  |
| b3656 | yicI | Isolate 2 | non-essential | predicted alpha-glucosidase                                                 | 0.51  |
| b3657 | yicJ | Isolate 1 | non-essential | predicted transporter                                                       | 0.99  |
| b3657 | yicJ | Isolate 2 | non-essential | predicted transporter                                                       | -0.81 |
| b3659 | setC | Isolate 1 | non-essential | predicted sugar efflux system                                               | -0.44 |
| b3659 | setC | Isolate 2 | non-essential | predicted sugar efflux system                                               | -2.23 |
| b3660 | yicL | Isolate 1 | non-essential | predicted inner membrane protein                                            | 0.83  |
| b3660 | yicL | Isolate 2 | non-essential | predicted inner membrane protein                                            | -0.98 |
| b3661 | nlpA | Isolate 1 | non-essential | cytoplasmic membrane lipoprotein-28                                         | 1.19  |
| b3661 | nlpA | Isolate 2 | non-essential | cytoplasmic membrane lipoprotein-28                                         | -1.44 |
| b3662 | yicM | Isolate 1 | non-essential | predicted transporter                                                       | 0.44  |
| b3662 | yicM | Isolate 2 | non-essential | predicted transporter                                                       | 0.78  |
| b3663 | yicN | Isolate 1 | non-essential | conserved protein                                                           | -0.55 |
| b3663 | yicN | Isolate 2 | non-essential | conserved protein                                                           | 0.28  |
| b3664 | yicO | Isolate 1 | non-essential | predicted xanthine/uracil permase                                           | 0.89  |
| b3664 | yicO | Isolate 2 | non-essential | predicted xanthine/uracil permase                                           | -0.27 |
| b3665 | ade  | Isolate 1 | non-essential | cryptic adenine deaminase                                                   | -1.20 |
| b3665 | ade  | Isolate 2 | non-essential | cryptic adenine deaminase                                                   | 2.67  |
| b3666 | uhpT | Isolate 1 | non-essential | hexose phosphate transporter                                                | -0.07 |
| b3666 | uhpT | Isolate 2 | non-essential | hexose phosphate transporter                                                | -0.37 |
| b3667 | uhpC | Isolate 1 | non-essential | membrane protein regulates uhpT expression                                  | 5.41  |
| b3667 | uhpC | Isolate 2 | non-essential | membrane protein regulates uhpT expression                                  | 0.14  |
| b3668 | uhpB | Isolate 1 | non-essential | sensory histidine kinase in two-component regulatory sytem with UhpA        | -0.32 |
| b3668 | uhpB | Isolate 2 | non-essential | sensory histidine kinase in two-component regulatory sytem with UhpA        | 1.76  |
| b3669 | uhpA | Isolate 1 | non-essential | DNA-binding response regulator in two-component regulatory system wtih UhpB | -1.07 |
| b3669 | uhpA | Isolate 2 | non-essential | DNA-binding response regulator in two-component regulatory system wtih UhpB | -0.76 |
| b3670 | ilvN | Isolate 1 | non-essential | acetolactate synthase I, small subunit                                      | 0.45  |
| b3670 | ilvN | Isolate 2 | non-essential | acetolactate synthase I, small subunit                                      | 1.24  |
| b3671 | ilvB | Isolate 1 | non-essential | acetolactate synthase I, large subunit                                      | 0.65  |
| b3671 | ilvB | Isolate 2 | non-essential | acetolactate synthase I, large subunit                                      | -0.28 |
| b3672 | ivbL | Isolate 1 | non-essential | ilvB operon leader peptide                                                  | -1.48 |
| b3672 | ivbL | Isolate 2 | non-essential | ilvB operon leader peptide                                                  | 0.82  |
| b3673 | emrD | Isolate 1 | non-essential | multidrug efflux system protein                                             | 0.99  |
| b3673 | emrD | Isolate 2 | non-essential | multidrug efflux system protein                                             | 0.60  |
| b3674 | yidF | Isolate 1 | non-essential | predicted DNA-binding transcriptional regulator                             | -0.60 |
| b3674 | yidF | Isolate 2 | non-essential | predicted DNA-binding transcriptional regulator                             | -3.38 |
| b3675 | yidG | Isolate 1 | non-essential | predicted inner membrane protein                                            | -0.77 |
| b3675 | yidG | Isolate 2 | non-essential | predicted inner membrane protein                                            | 0.25  |
| b3676 | yidH | Isolate 1 | non-essential | conserved inner membrane protein                                            | 0.25  |



|       |      |           |               |                                                     |       |
|-------|------|-----------|---------------|-----------------------------------------------------|-------|
| b3676 | yidH | Isolate 2 | non-essential | conserved inner membrane protein                    | 1.88  |
| b3677 | yidI | Isolate 1 | non-essential | predicted inner membrane protein                    | 0.11  |
| b3677 | yidI | Isolate 2 | non-essential | predicted inner membrane protein                    | -0.58 |
| b3678 | yidJ | Isolate 1 | non-essential | predicted sulfatase/phosphatase                     | -0.15 |
| b3678 | yidJ | Isolate 2 | non-essential | predicted sulfatase/phosphatase                     | -0.98 |
| b3679 | yidK | Isolate 1 | non-essential | predicted transporter                               | 1.17  |
| b3679 | yidK | Isolate 2 | non-essential | predicted transporter                               | 0.45  |
| b3680 | yidL | Isolate 1 | non-essential | predicted DNA-binding transcriptional regulator     | 0.34  |
| b3680 | yidL | Isolate 2 | non-essential | predicted DNA-binding transcriptional regulator     | -1.13 |
| b3681 | glvG | Isolate 1 | *             | predicted 6-phospho-beta-glucosidase (pseudogene)   | 0.47  |
| b3681 | glvG | Isolate 2 | *             | predicted 6-phospho-beta-glucosidase (pseudogene)   | 0.68  |
| b3682 | glvB | Isolate 1 | non-essential | arbutin specific enzyme IIB component of PTS        | 1.37  |
| b3682 | glvB | Isolate 2 | non-essential | arbutin specific enzyme IIB component of PTS        | 0.56  |
| b3683 | glvC | Isolate 1 | non-essential | arbutin sp ecific enzyme IIC component of PTS       | 0.22  |
| b3683 | glvC | Isolate 2 | non-essential | arbutin sp ecific enzyme IIC component of PTS       | -0.93 |
| b3684 | yidP | Isolate 1 | non-essential | predicted DNA-binding transcriptional regulator     | -0.19 |
| b3684 | yidP | Isolate 2 | non-essential | predicted DNA-binding transcriptional regulator     | 0.87  |
| b3685 | yidE | Isolate 1 | non-essential | predicted transporter                               | 0.50  |
| b3685 | yidE | Isolate 2 | non-essential | predicted transporter                               | 0.84  |
| b3686 | ibpB | Isolate 1 | non-essential | heat shock chaperone                                | 0.13  |
| b3686 | ibpB | Isolate 2 | non-essential | heat shock chaperone                                | 0.36  |
| b3687 | ibpA | Isolate 1 | non-essential | heat shock chaperone                                | 0.91  |
| b3687 | ibpA | Isolate 2 | non-essential | heat shock chaperone                                | 1.28  |
| b3688 | yidQ | Isolate 1 | non-essential | conserved outer membrane protein                    | 0.25  |
| b3688 | yidQ | Isolate 2 | non-essential | conserved outer membrane protein                    | -0.25 |
| b3689 | yidR | Isolate 1 | non-essential | conserved protein                                   | -1.40 |
| b3689 | yidR | Isolate 2 | non-essential | conserved protein                                   | -0.93 |
| b3690 | cbrA | Isolate 1 | non-essential | predicted oxidoreductase, FAD/NAD(P)-binding domain | -0.57 |
| b3690 | cbrA | Isolate 2 | non-essential | predicted oxidoreductase, FAD/NAD(P)-binding domain | 0.71  |
| b3691 | dgoT | Isolate 1 | non-essential | D-galactonate transporter                           | -0.36 |
| b3691 | dgoT | Isolate 2 | non-essential | D-galactonate transporter                           | 0.50  |
| b3692 | *    | Isolate 1 | *             | *                                                   | -1.36 |
| b3692 | *    | Isolate 2 | *             | *                                                   | 1.18  |
| b3693 | dgoK | Isolate 1 | non-essential | 2-oxo-3-deoxygalactonate kinase                     | -1.41 |
| b3693 | dgoK | Isolate 2 | non-essential | 2-oxo-3-deoxygalactonate kinase                     | 0.38  |
| b3696 | yidX | Isolate 1 | non-essential | predicted lipoproteinC                              | -0.98 |
| b3696 | yidX | Isolate 2 | non-essential | predicted lipoproteinC                              | 0.80  |
| b3697 | yidA | Isolate 1 | non-essential | predicted hydrolase                                 | -0.93 |
| b3697 | yidA | Isolate 2 | non-essential | predicted hydrolase                                 | -1.39 |
| b3698 | yidB | Isolate 1 | non-essential | conserved protein                                   | 1.83  |
| b3698 | yidB | Isolate 2 | non-essential | conserved protein                                   | 1.39  |
| b3700 | recF | Isolate 1 | non-essential | gap repair protein                                  | -0.54 |
| b3700 | recF | Isolate 2 | non-essential | gap repair protein                                  | -0.95 |

|       |      |           |               |                                                                                            |       |
|-------|------|-----------|---------------|--------------------------------------------------------------------------------------------|-------|
| b3701 | dnaN | Isolate 1 | essential     | DNA polymerase III, beta subunit                                                           | 1.32  |
| b3702 | dnaA | Isolate 1 | essential     | chromosomal replication initiator protein DnaA, DNA-binding transcriptional dual regulator | -0.07 |
| b3704 | rnpA | Isolate 1 | essential     | protein C5 component of RNase P                                                            | 0.22  |
| b3705 | yidC | Isolate 1 | essential     | cytoplasmic insertase into membrane protein, Sec system                                    | 0.83  |
| b3706 | trmE | Isolate 1 | non-essential | GTPase                                                                                     | -0.30 |
| b3706 | trmE | Isolate 2 | non-essential | GTPase                                                                                     | 0.26  |
| b3707 | tnaC | Isolate 1 | non-essential | tryptophanase leader peptide                                                               | 0.64  |
| b3707 | tnaC | Isolate 2 | non-essential | tryptophanase leader peptide                                                               | -0.40 |
| b3708 | tnaA | Isolate 1 | non-essential | tryptophanase/L-cysteine desulfhydrase, PLP-dependent                                      | 1.97  |
| b3708 | tnaA | Isolate 2 | non-essential | tryptophanase/L-cysteine desulfhydrase, PLP-dependent                                      | 4.15  |
| b3709 | tnaB | Isolate 1 | unknown       | tryptophan transporter of low affinity                                                     | -1.23 |
| b3709 | tnaB | Isolate 2 | unknown       | tryptophan transporter of low affinity                                                     | -0.98 |
| b3710 | mdtL | Isolate 1 | non-essential | multidrug efflux system protein                                                            | 0.37  |
| b3710 | mdtL | Isolate 2 | non-essential | multidrug efflux system protein                                                            | -1.63 |
| b3711 | yidZ | Isolate 1 | non-essential | predicted DNA-binding transcriptional regulator                                            | -1.79 |
| b3711 | yidZ | Isolate 2 | non-essential | predicted DNA-binding transcriptional regulator                                            | -1.61 |
| b3712 | yieE | Isolate 1 | non-essential | predicted phosphopantetheinyl transferase                                                  | -0.55 |
| b3712 | yieE | Isolate 2 | non-essential | predicted phosphopantetheinyl transferase                                                  | 0.86  |
| b3713 | yieF | Isolate 1 | non-essential | chromate reductase, Class I, flavoprotein                                                  | 1.71  |
| b3713 | yieF | Isolate 2 | non-essential | chromate reductase, Class I, flavoprotein                                                  | 0.75  |
| b3714 | yieG | Isolate 1 | non-essential | predicted inner membrane protein                                                           | -2.28 |
| b3714 | yieG | Isolate 2 | non-essential | predicted inner membrane protein                                                           | -0.97 |
| b3715 | yieH | Isolate 1 | non-essential | predicted hydrolase                                                                        | -1.18 |
| b3715 | yieH | Isolate 2 | non-essential | predicted hydrolase                                                                        | -0.16 |
| b3716 | yieI | Isolate 1 | non-essential | predicted inner membrane protein                                                           | -1.32 |
| b3716 | yieI | Isolate 2 | non-essential | predicted inner membrane protein                                                           | -0.75 |
| b3717 | cbrC | Isolate 1 | non-essential | conserved protein                                                                          | -0.55 |
| b3717 | cbrC | Isolate 2 | non-essential | conserved protein                                                                          | 0.22  |
| b3718 | yieK | Isolate 1 | non-essential | predicted 6-phosphogluconolactonase                                                        | 2.71  |
| b3718 | yieK | Isolate 2 | non-essential | predicted 6-phosphogluconolactonase                                                        | 2.52  |
| b3719 | yieL | Isolate 1 | non-essential | predicted xylanase                                                                         | -1.08 |
| b3719 | yieL | Isolate 2 | non-essential | predicted xylanase                                                                         | 0.23  |
| b3720 | bglH | Isolate 1 | non-essential | carbohydrate-specific outer membrane porin, cryptic                                        | -0.16 |
| b3720 | bglH | Isolate 2 | non-essential | carbohydrate-specific outer membrane porin, cryptic                                        | -1.76 |
| b3721 | bglB | Isolate 1 | non-essential | cryptic phospho-beta-glucosidase B                                                         | 0.24  |
| b3721 | bglB | Isolate 2 | non-essential | cryptic phospho-beta-glucosidase B                                                         | 1.21  |
| b3722 | bglF | Isolate 1 | non-essential | fused beta-glucoside-specific PTS enzyme IIABC components                                  | 2.76  |
| b3722 | bglF | Isolate 2 | non-essential | fused beta-glucoside-specific PTS enzyme IIABC components                                  | 0.49  |
| b3723 | bglG | Isolate 1 | non-essential | transcriptional antiterminator of the bgl operon                                           | 1.72  |
| b3723 | bglG | Isolate 2 | non-essential | transcriptional antiterminator of the bgl operon                                           | 0.27  |
| b3724 | phoU | Isolate 1 | non-essential | DNA-binding transcriptional regulator                                                      | -0.16 |
| b3724 | phoU | Isolate 2 | non-essential | DNA-binding transcriptional regulator                                                      | 0.37  |
| b3725 | pstB | Isolate 1 | non-essential | phosphate transporter subunit -!- ATP-binding component of ABC superfamily                 | -1.60 |

|       |      |           |               |                                                                                                           |       |
|-------|------|-----------|---------------|-----------------------------------------------------------------------------------------------------------|-------|
| b3725 | pstB | Isolate 2 | non-essential | phosphate transporter subunit -!- ATP-binding component of ABC superfamily                                | -0.07 |
| b3726 | pstA | Isolate 1 | non-essential | phosphate transporter subunit -!- membrane component of ABC superfamily                                   | 0.81  |
| b3726 | pstA | Isolate 2 | non-essential | phosphate transporter subunit -!- membrane component of ABC superfamily                                   | -1.80 |
| b3727 | pstC | Isolate 1 | non-essential | phosphate transporter subunit -!- membrane component of ABC superfamily                                   | 1.50  |
| b3727 | pstC | Isolate 2 | non-essential | phosphate transporter subunit -!- membrane component of ABC superfamily                                   | -0.88 |
| b3728 | pstS | Isolate 1 | non-essential | phosphate transporter subunit -!- periplasmic-binding component of ABC superfamily                        | -1.30 |
| b3728 | pstS | Isolate 2 | non-essential | phosphate transporter subunit -!- periplasmic-binding component of ABC superfamily                        | -1.17 |
| b3729 | glmS | Isolate 1 | essential     | L-glutamine:D-fructose-6-phosphate aminotransferase                                                       | 3.75  |
| b3730 | glmU | Isolate 1 | essential     | fused N-acetyl glucosamine-1-phosphate uridylyltransferase -!- glucosamine-1-phosphate acetyl transferase | 1.44  |
| b3731 | atpC | Isolate 1 | non-essential | F1 sector of membrane-bound ATP synthase, epsilon subunit                                                 | 0.04  |
| b3731 | atpC | Isolate 2 | non-essential | F1 sector of membrane-bound ATP synthase, epsilon subunit                                                 | 0.13  |
| b3732 | atpD | Isolate 1 | non-essential | F1 sector of membrane-bound ATP synthase, beta subunit                                                    | 9.63  |
| b3732 | atpD | Isolate 2 | non-essential | F1 sector of membrane-bound ATP synthase, beta subunit                                                    | 0.24  |
| b3733 | atpG | Isolate 1 | non-essential | F1 sector of membrane-bound ATP synthase, gamma subunit                                                   | 0.19  |
| b3733 | atpG | Isolate 2 | non-essential | F1 sector of membrane-bound ATP synthase, gamma subunit                                                   | 3.06  |
| b3734 | atpA | Isolate 1 | non-essential | F1 sector of membrane-bound ATP synthase, alpha subunit                                                   | -0.76 |
| b3734 | atpA | Isolate 2 | non-essential | F1 sector of membrane-bound ATP synthase, alpha subunit                                                   | 1.61  |
| b3735 | atpH | Isolate 1 | non-essential | F1 sector of membrane-bound ATP synthase, delta subunit                                                   | 1.17  |
| b3735 | atpH | Isolate 2 | non-essential | F1 sector of membrane-bound ATP synthase, delta subunit                                                   | -0.25 |
| b3736 | atpF | Isolate 1 | non-essential | F0 sector of membrane-bound ATP synthase, subunit b                                                       | -0.58 |
| b3736 | atpF | Isolate 2 | non-essential | F0 sector of membrane-bound ATP synthase, subunit b                                                       | 2.45  |
| b3737 | atpE | Isolate 1 | non-essential | F0 sector of membrane-bound ATP synthase, subunit c                                                       | 1.05  |
| b3737 | atpE | Isolate 2 | non-essential | F0 sector of membrane-bound ATP synthase, subunit c                                                       | 0.32  |
| b3738 | atpB | Isolate 1 | non-essential | F0 sector of membrane-bound ATP synthase, subunit a                                                       | 0.46  |
| b3738 | atpB | Isolate 2 | non-essential | F0 sector of membrane-bound ATP synthase, subunit a                                                       | 0.59  |
| b3739 | atpI | Isolate 1 | non-essential | ATP synthase, membrane-bound accessory subunit                                                            | 1.57  |
| b3739 | atpI | Isolate 2 | non-essential | ATP synthase, membrane-bound accessory subunit                                                            | 1.21  |
| b3740 | gidB | Isolate 1 | non-essential | methyltransferase, glucose-inhibited cell-division protein                                                | -1.49 |
| b3740 | gidB | Isolate 2 | non-essential | methyltransferase, glucose-inhibited cell-division protein                                                | -0.76 |
| b3741 | gidA | Isolate 1 | non-essential | glucose-inhibited cell-division protein                                                                   | -2.33 |
| b3741 | gidA | Isolate 2 | non-essential | glucose-inhibited cell-division protein                                                                   | -1.01 |
| b3742 | mioC | Isolate 1 | non-essential | FMN-binding protein MioC                                                                                  | -0.06 |
| b3742 | mioC | Isolate 2 | non-essential | FMN-binding protein MioC                                                                                  | 2.02  |
| b3743 | asnC | Isolate 1 | non-essential | DNA-binding transcriptional dual regulator                                                                | -0.15 |
| b3743 | asnC | Isolate 2 | non-essential | DNA-binding transcriptional dual regulator                                                                | 2.14  |
| b3744 | asnA | Isolate 1 | non-essential | asparagine synthetase A                                                                                   | 2.06  |
| b3744 | asnA | Isolate 2 | non-essential | asparagine synthetase A                                                                                   | 1.67  |
| b3745 | yieM | Isolate 1 | non-essential | predicted von Willibrand factor containing protein                                                        | 0.32  |
| b3745 | yieM | Isolate 2 | non-essential | predicted von Willibrand factor containing protein                                                        | -1.26 |
| b3746 | yieN | Isolate 1 | non-essential | fused predicted transcriptional regulators                                                                | 1.93  |
| b3746 | yieN | Isolate 2 | non-essential | fused predicted transcriptional regulators                                                                | 1.63  |
| b3747 | trkD | Isolate 1 | non-essential | potassium transporter                                                                                     | 0.51  |
| b3747 | trkD | Isolate 2 | non-essential | potassium transporter                                                                                     | -0.81 |

|       |      |           |               |                                                                                  |       |
|-------|------|-----------|---------------|----------------------------------------------------------------------------------|-------|
| b3748 | rbsD | Isolate 1 | non-essential | predicted cytoplasmic sugar-binding protein                                      | 0.49  |
| b3748 | rbsD | Isolate 2 | non-essential | predicted cytoplasmic sugar-binding protein                                      | -0.84 |
| b3749 | rbsA | Isolate 1 | non-essential | fused D-ribose transporter subunits -!- ATP-binding components ABC superfamily   | 1.10  |
| b3749 | rbsA | Isolate 2 | non-essential | fused D-ribose transporter subunits -!- ATP-binding components ABC superfamily   | 0.48  |
| b3750 | rbsC | Isolate 1 | non-essential | D-ribose transporter subunit -!- membrane component of ABC superfamily           | 0.78  |
| b3750 | rbsC | Isolate 2 | non-essential | D-ribose transporter subunit -!- membrane component of ABC superfamily           | 2.41  |
| b3751 | rbsB | Isolate 1 | non-essential | D-ribose transporter subunit -!- periplasmic-binding compoent of ABC superfamily | -0.76 |
| b3751 | rbsB | Isolate 2 | non-essential | D-ribose transporter subunit -!- periplasmic-binding compoent of ABC superfamily | 0.38  |
| b3752 | rbsK | Isolate 1 | non-essential | ribokinase                                                                       | 1.79  |
| b3752 | rbsK | Isolate 2 | non-essential | ribokinase                                                                       | 1.76  |
| b3753 | rbsR | Isolate 1 | non-essential | DNA-binding transcriptional repressor                                            | 0.03  |
| b3753 | rbsR | Isolate 2 | non-essential | DNA-binding transcriptional repressor                                            | 1.20  |
| b3754 | hsrA | Isolate 1 | non-essential | predicted multidrug or homocysteine efflux system                                | 0.68  |
| b3754 | hsrA | Isolate 2 | non-essential | predicted multidrug or homocysteine efflux system                                | -1.01 |
| b3755 | yieP | Isolate 1 | non-essential | predicted transcriptional regulator                                              | -1.43 |
| b3755 | yieP | Isolate 2 | non-essential | predicted transcriptional regulator                                              | -0.03 |
| b3764 | yifE | Isolate 1 | non-essential | conserved protein                                                                | -0.13 |
| b3764 | yifE | Isolate 2 | non-essential | conserved protein                                                                | -0.45 |
| b3765 | yifB | Isolate 1 | non-essential | predicted bifunctional protein, enzyme and transcriptional regulator             | -0.06 |
| b3765 | yifB | Isolate 2 | non-essential | predicted bifunctional protein, enzyme and transcriptional regulator             | -1.44 |
| b3766 | ilvL | Isolate 1 | non-essential | ilv operon leader peptide                                                        | 0.90  |
| b3766 | ilvL | Isolate 2 | non-essential | ilv operon leader peptide                                                        | 1.37  |
| b3767 | ilvG | Isolate 1 | *             | acetolactate synthase II, large subunit, N-ter fragment (pseudogene)             | 1.03  |
| b3767 | ilvG | Isolate 2 | *             | acetolactate synthase II, large subunit, N-ter fragment (pseudogene)             | 0.32  |
| b3769 | ilvM | Isolate 1 | non-essential | acetolactate synthase II, small subunit                                          | -0.43 |
| b3769 | ilvM | Isolate 2 | non-essential | acetolactate synthase II, small subunit                                          | 1.15  |
| b3770 | ilvE | Isolate 1 | non-essential | branched-chain amino-acid aminotransferase                                       | 1.10  |
| b3770 | ilvE | Isolate 2 | non-essential | branched-chain amino-acid aminotransferase                                       | 1.27  |
| b3771 | ilvD | Isolate 1 | non-essential | dihydroxyacid dehydratase                                                        | 0.83  |
| b3771 | ilvD | Isolate 2 | non-essential | dihydroxyacid dehydratase                                                        | 0.34  |
| b3772 | ilvA | Isolate 1 | non-essential | threonine deaminase                                                              | 0.06  |
| b3772 | ilvA | Isolate 2 | non-essential | threonine deaminase                                                              | 2.71  |
| b3773 | ilvY | Isolate 1 | non-essential | DNA-binding transcriptional dual regulator                                       | 2.02  |
| b3773 | ilvY | Isolate 2 | non-essential | DNA-binding transcriptional dual regulator                                       | 1.01  |
| b3774 | ilvC | Isolate 1 | non-essential | ketol-acid reductoisomerase, NAD(P)-binding                                      | 0.65  |
| b3774 | ilvC | Isolate 2 | non-essential | ketol-acid reductoisomerase, NAD(P)-binding                                      | 0.35  |
| b3775 | ppiC | Isolate 1 | non-essential | peptidyl-prolyl cis-trans isomerase C (rotamase C)                               | -1.28 |
| b3775 | ppiC | Isolate 2 | non-essential | peptidyl-prolyl cis-trans isomerase C (rotamase C)                               | 0.81  |
| b3777 | yifN | Isolate 1 | *             | conserved protein (pseudogene)                                                   | -0.37 |
| b3777 | yifN | Isolate 2 | *             | conserved protein (pseudogene)                                                   | -0.90 |
| b3778 | rep  | Isolate 1 | non-essential | DNA helicase and single-stranded DNA-dependent ATPase                            | 0.06  |
| b3778 | rep  | Isolate 2 | non-essential | DNA helicase and single-stranded DNA-dependent ATPase                            | 0.16  |
| b3779 | gpp  | Isolate 1 | non-essential | guanosine pentaphosphatase/exopolyphosphatase                                    | -0.66 |

|       |      |           |               |                                                                                   |       |
|-------|------|-----------|---------------|-----------------------------------------------------------------------------------|-------|
| b3779 | gpp  | Isolate 2 | non-essential | guanosine pentaphosphatase/exopolyphosphatase                                     | 1.01  |
| b3780 | rhIB | Isolate 1 | non-essential | ATP-dependent RNA helicase                                                        | 0.12  |
| b3780 | rhIB | Isolate 2 | non-essential | ATP-dependent RNA helicase                                                        | -2.16 |
| b3781 | trxA | Isolate 1 | non-essential | thioredoxin 1                                                                     | 0.44  |
| b3781 | trxA | Isolate 2 | non-essential | thioredoxin 1                                                                     | -2.34 |
| b3782 | rhoL | Isolate 1 | non-essential | rho operon leader peptide                                                         | 0.05  |
| b3782 | rhoL | Isolate 2 | non-essential | rho operon leader peptide                                                         | -2.12 |
| b3783 | rho  | Isolate 1 | non-essential | transcription termination factor                                                  | 2.34  |
| b3783 | rho  | Isolate 2 | non-essential | transcription termination factor                                                  | 2.39  |
| b3784 | rfe  | Isolate 1 | non-essential | UDP-GlcNAc:undecaprenylphosphate GlcNAc-1-phosphate transferase                   | -0.69 |
| b3784 | rfe  | Isolate 2 | non-essential | UDP-GlcNAc:undecaprenylphosphate GlcNAc-1-phosphate transferase                   | -0.40 |
| b3785 | wzzE | Isolate 1 | non-essential | Entobacterial Common Antigen (ECA) polysaccharide chain length modulation protein | 0.02  |
| b3785 | wzzE | Isolate 2 | non-essential | Entobacterial Common Antigen (ECA) polysaccharide chain length modulation protein | 0.55  |
| b3786 | rffE | Isolate 1 | non-essential | UDP-N-acetyl glucosamine-2-epimerase                                              | -2.34 |
| b3786 | rffE | Isolate 2 | non-essential | UDP-N-acetyl glucosamine-2-epimerase                                              | 0.10  |
| b3787 | rffD | Isolate 1 | non-essential | UDP-N-acetyl-D-mannosaminuronic acid dehydrogenase                                | -3.40 |
| b3787 | rffD | Isolate 2 | non-essential | UDP-N-acetyl-D-mannosaminuronic acid dehydrogenase                                | -0.12 |
| b3788 | rffG | Isolate 1 | non-essential | dTDP-glucose 4,6-dehydratase                                                      | -0.04 |
| b3788 | rffG | Isolate 2 | non-essential | dTDP-glucose 4,6-dehydratase                                                      | -0.57 |
| b3789 | rffH | Isolate 1 | non-essential | glucose-1-phosphate thymidyltransferase                                           | -0.45 |
| b3789 | rffH | Isolate 2 | non-essential | glucose-1-phosphate thymidyltransferase                                           | 0.11  |
| b3790 | rffC | Isolate 1 | non-essential | TDP-fucosamine acetyltransferase                                                  | -0.02 |
| b3790 | rffC | Isolate 2 | non-essential | TDP-fucosamine acetyltransferase                                                  | -0.13 |
| b3791 | rffA | Isolate 1 | non-essential | TDP-4-oxo-6-deoxy-D-glucose transaminase                                          | 0.42  |
| b3791 | rffA | Isolate 2 | non-essential | TDP-4-oxo-6-deoxy-D-glucose transaminase                                          | 0.50  |
| b3792 | wzxE | Isolate 1 | non-essential | O-antigen translocase                                                             | 1.17  |
| b3792 | wzxE | Isolate 2 | non-essential | O-antigen translocase                                                             | 1.68  |
| b3794 | rffM | Isolate 1 | non-essential | UDP-N-acetyl-D-mannosaminuronic acid transferase                                  | 0.18  |
| b3794 | rffM | Isolate 2 | non-essential | UDP-N-acetyl-D-mannosaminuronic acid transferase                                  | -1.70 |
| b3795 | yifK | Isolate 1 | non-essential | predicted transporter                                                             | -0.70 |
| b3795 | yifK | Isolate 2 | non-essential | predicted transporter                                                             | 0.19  |
| b3800 | aslB | Isolate 1 | non-essential | predicted regulator of arylsulfatase activity                                     | 0.17  |
| b3800 | aslB | Isolate 2 | non-essential | predicted regulator of arylsulfatase activity                                     | -0.71 |
| b3801 | aslA | Isolate 1 | non-essential | arylsulfatase-like enzyme                                                         | 0.11  |
| b3801 | aslA | Isolate 2 | non-essential | arylsulfatase-like enzyme                                                         | 1.93  |
| b3802 | hemY | Isolate 1 | non-essential | predicted protoheme IX synthesis protein                                          | -0.86 |
| b3802 | hemY | Isolate 2 | non-essential | predicted protoheme IX synthesis protein                                          | -0.86 |
| b3803 | hemX | Isolate 1 | non-essential | uroporphyrinogen III methylase                                                    | 2.48  |
| b3803 | hemX | Isolate 2 | non-essential | uroporphyrinogen III methylase                                                    | 1.59  |
| b3806 | cyaA | Isolate 1 | non-essential | adenylate cyclase                                                                 | 0.74  |
| b3806 | cyaA | Isolate 2 | non-essential | adenylate cyclase                                                                 | 2.30  |
| b3807 | cyaY | Isolate 1 | non-essential | frataxin, iron-binding and oxidizing protein                                      | -0.20 |
| b3807 | cyaY | Isolate 2 | non-essential | frataxin, iron-binding and oxidizing protein                                      | 0.39  |

|       |      |           |               |                                                                        |       |
|-------|------|-----------|---------------|------------------------------------------------------------------------|-------|
| b3808 | yzcX | Isolate 1 | non-essential | predicted protein                                                      | -0.48 |
| b3808 | yzcX | Isolate 2 | non-essential | predicted protein                                                      | 0.99  |
| b3809 | dapF | Isolate 1 | non-essential | diaminopimelate epimerase                                              | 2.31  |
| b3809 | dapF | Isolate 2 | non-essential | diaminopimelate epimerase                                              | 5.48  |
| b3810 | yigA | Isolate 1 | non-essential | conserved protein                                                      | 1.24  |
| b3810 | yigA | Isolate 2 | non-essential | conserved protein                                                      | 7.09  |
| b3811 | xerC | Isolate 1 | non-essential | site-specific tyrosine recombinase                                     | 0.62  |
| b3811 | xerC | Isolate 2 | non-essential | site-specific tyrosine recombinase                                     | 1.37  |
| b3812 | yigB | Isolate 1 | non-essential | predicted hydrolase                                                    | 0.00  |
| b3812 | yigB | Isolate 2 | non-essential | predicted hydrolase                                                    | 0.64  |
| b3813 | uvrD | Isolate 1 | non-essential | DNA-dependent ATPase I and helicase II                                 | -0.89 |
| b3813 | uvrD | Isolate 2 | non-essential | DNA-dependent ATPase I and helicase II                                 | 0.83  |
| b3816 | corA | Isolate 1 | non-essential | magnesium/nickel/cobalt transporter                                    | 1.53  |
| b3816 | corA | Isolate 2 | non-essential | magnesium/nickel/cobalt transporter                                    | -0.01 |
| b3817 | yigF | Isolate 1 | non-essential | conserved inner membrane protein                                       | 1.81  |
| b3817 | yigF | Isolate 2 | non-essential | conserved inner membrane protein                                       | 1.45  |
| b3818 | yigG | Isolate 1 | non-essential | predicted inner membrane protein                                       | 0.70  |
| b3818 | yigG | Isolate 2 | non-essential | predicted inner membrane protein                                       | 0.45  |
| b3819 | rarD | Isolate 1 | non-essential | predicted chloramphenical resistance permease                          | -0.06 |
| b3819 | rarD | Isolate 2 | non-essential | predicted chloramphenical resistance permease                          | 0.25  |
| b3820 | yigI | Isolate 1 | non-essential | conserved protein                                                      | 2.68  |
| b3820 | yigI | Isolate 2 | non-essential | conserved protein                                                      | 1.38  |
| b3821 | pldA | Isolate 1 | non-essential | outer membrane phospholipase A                                         | -0.74 |
| b3821 | pldA | Isolate 2 | non-essential | outer membrane phospholipase A                                         | -1.71 |
| b3822 | recQ | Isolate 1 | non-essential | ATP-dependent DNA helicase                                             | -0.35 |
| b3822 | recQ | Isolate 2 | non-essential | ATP-dependent DNA helicase                                             | -0.45 |
| b3823 | rhtC | Isolate 1 | non-essential | threonine efflux system                                                | 0.37  |
| b3823 | rhtC | Isolate 2 | non-essential | threonine efflux system                                                | 1.41  |
| b3824 | rhtB | Isolate 1 | non-essential | neutral amino-acid efflux system                                       | 1.79  |
| b3824 | rhtB | Isolate 2 | non-essential | neutral amino-acid efflux system                                       | -2.04 |
| b3825 | pldB | Isolate 1 | non-essential | lysophospholipase L(2)                                                 | 0.50  |
| b3825 | pldB | Isolate 2 | non-essential | lysophospholipase L(2)                                                 | -0.18 |
| b3826 | yigL | Isolate 1 | non-essential | predicted hydrolase                                                    | 0.78  |
| b3826 | yigL | Isolate 2 | non-essential | predicted hydrolase                                                    | 1.34  |
| b3827 | yigM | Isolate 1 | non-essential | predicted inner membrane protein                                       | 0.93  |
| b3827 | yigM | Isolate 2 | non-essential | predicted inner membrane protein                                       | 0.00  |
| b3828 | metR | Isolate 1 | non-essential | DNA-binding transcriptional activator, homocysteine-binding            | 1.35  |
| b3828 | metR | Isolate 2 | non-essential | DNA-binding transcriptional activator, homocysteine-binding            | 1.98  |
| b3829 | metE | Isolate 1 | non-essential | 5-methyltetrahydropteroyltriglutamate-homocysteine S-methyltransferase | -0.43 |
| b3829 | metE | Isolate 2 | non-essential | 5-methyltetrahydropteroyltriglutamate-homocysteine S-methyltransferase | 0.52  |
| b3830 | ysgA | Isolate 1 | non-essential | predicted hydrolase                                                    | -0.38 |
| b3830 | ysgA | Isolate 2 | non-essential | predicted hydrolase                                                    | -0.57 |
| b3831 | udp  | Isolate 1 | non-essential | uridine phosphorylase                                                  | -1.02 |

|       |      |           |               |                                                                                                                                            |       |
|-------|------|-----------|---------------|--------------------------------------------------------------------------------------------------------------------------------------------|-------|
| b3831 | udp  | Isolate 2 | non-essential | uridine phosphorylase                                                                                                                      | -0.69 |
| b3832 | rmuC | Isolate 1 | non-essential | predicted recombination limiting protein                                                                                                   | -0.21 |
| b3832 | rmuC | Isolate 2 | non-essential | predicted recombination limiting protein                                                                                                   | -1.18 |
| b3833 | ubiE | Isolate 1 | non-essential | bifunctional 2-octaprenyl-6-methoxy-1,4-benzoquinone methylase -!- S-adenosylmethionine:2-DMK methyltransferase                            | 1.89  |
| b3833 | ubiE | Isolate 2 | non-essential | bifunctional 2-octaprenyl-6-methoxy-1,4-benzoquinone methylase -!- S-adenosylmethionine:2-DMK methyltransferase                            | 1.77  |
| b3835 | ubiB | Isolate 1 | essential     | 2-octaprenylphenol hydroxylase                                                                                                             | 0.47  |
| b3836 | tatA | Isolate 1 | non-essential | TatABCE protein translocation system subunit                                                                                               | 0.06  |
| b3836 | tatA | Isolate 2 | non-essential | TatABCE protein translocation system subunit                                                                                               | 2.33  |
| b3838 | tatB | Isolate 1 | non-essential | TatABCE protein translocation system subunit                                                                                               | -0.16 |
| b3838 | tatB | Isolate 2 | non-essential | TatABCE protein translocation system subunit                                                                                               | 0.28  |
| b3839 | tatC | Isolate 1 | non-essential | TatABCE protein translocation system subunit                                                                                               | -0.08 |
| b3839 | tatC | Isolate 2 | non-essential | TatABCE protein translocation system subunit                                                                                               | 0.13  |
| b3842 | rfaH | Isolate 1 | non-essential | DNA-binding transcriptional antiterminator                                                                                                 | -1.58 |
| b3842 | rfaH | Isolate 2 | non-essential | DNA-binding transcriptional antiterminator                                                                                                 | 0.76  |
| b3844 | fre  | Isolate 1 | non-essential | flavin reductase                                                                                                                           | 4.95  |
| b3844 | fre  | Isolate 2 | non-essential | flavin reductase                                                                                                                           | 2.20  |
| b3845 | fadA | Isolate 1 | non-essential | 3-ketoacyl-CoA thiolase (thiolase I)                                                                                                       | 1.15  |
| b3845 | fadA | Isolate 2 | non-essential | 3-ketoacyl-CoA thiolase (thiolase I)                                                                                                       | -0.95 |
| b3846 | fadB | Isolate 1 | non-essential | fused 3-hydroxybutyryl-CoA epimerase/delta(3)-cis-delta(2)-trans-enoyl-CoA isomerase/enoyl-CoA hydratase -!- 3-hydroxyacyl-CoA dehydratase | 0.38  |
| b3846 | fadB | Isolate 2 | non-essential | fused 3-hydroxybutyryl-CoA epimerase/delta(3)-cis-delta(2)-trans-enoyl-CoA isomerase/enoyl-CoA hydratase -!- 3-hydroxyacyl-CoA dehydratase | -0.11 |
| b3847 | pepQ | Isolate 1 | non-essential | proline dipeptidase                                                                                                                        | -1.38 |
| b3847 | pepQ | Isolate 2 | non-essential | proline dipeptidase                                                                                                                        | -0.33 |
| b3848 | yigZ | Isolate 1 | non-essential | predicted elongation factor                                                                                                                | -0.39 |
| b3848 | yigZ | Isolate 2 | non-essential | predicted elongation factor                                                                                                                | 0.71  |
| b3849 | trkH | Isolate 1 | non-essential | potassium transporter                                                                                                                      | -1.78 |
| b3849 | trkH | Isolate 2 | non-essential | potassium transporter                                                                                                                      | -0.74 |
| b3856 | mobB | Isolate 1 | non-essential | molybdopterin-guanine dinucleotide biosynthesis protein B                                                                                  | -1.08 |
| b3856 | mobB | Isolate 2 | non-essential | molybdopterin-guanine dinucleotide biosynthesis protein B                                                                                  | -0.52 |
| b3857 | mobA | Isolate 1 | non-essential | molybdopterin-guanine dinucleotide synthase                                                                                                | 2.21  |
| b3857 | mobA | Isolate 2 | non-essential | molybdopterin-guanine dinucleotide synthase                                                                                                | 0.17  |
| b3858 | yihD | Isolate 1 | non-essential | conserved protein                                                                                                                          | 0.33  |
| b3858 | yihD | Isolate 2 | non-essential | conserved protein                                                                                                                          | -0.03 |
| b3859 | yihE | Isolate 1 | non-essential | predicted kinase                                                                                                                           | 1.75  |
| b3859 | yihE | Isolate 2 | non-essential | predicted kinase                                                                                                                           | 0.04  |
| b3860 | dsbA | Isolate 1 | non-essential | periplasmic protein disulfide isomerase I                                                                                                  | 0.69  |
| b3860 | dsbA | Isolate 2 | non-essential | periplasmic protein disulfide isomerase I                                                                                                  | -0.08 |
| b3861 | yihF | Isolate 1 | non-essential | conserved protein                                                                                                                          | -0.57 |
| b3861 | yihF | Isolate 2 | non-essential | conserved protein                                                                                                                          | -1.76 |
| b3862 | yihG | Isolate 1 | non-essential | predicted endonuclease                                                                                                                     | 1.46  |
| b3862 | yihG | Isolate 2 | non-essential | predicted endonuclease                                                                                                                     | 0.17  |
| b3863 | polA | Isolate 1 | non-essential | fused DNA polymerase I 5'->3' exonuclease -!- 3'->5' polymerase -!- 3'->5' exonuclease                                                     | 0.24  |
| b3863 | polA | Isolate 2 | non-essential | fused DNA polymerase I 5'->3' exonuclease -!- 3'->5' polymerase -!- 3'->5' exonuclease                                                     | 0.58  |
| b3865 | yihA | Isolate 1 | essential     | GTP-binding protein                                                                                                                        | 2.52  |

|       |      |           |               |                                                                                                               |       |
|-------|------|-----------|---------------|---------------------------------------------------------------------------------------------------------------|-------|
| b3866 | yihI | Isolate 1 | non-essential | conserved protein                                                                                             | 1.11  |
| b3866 | yihI | Isolate 2 | non-essential | conserved protein                                                                                             | -1.23 |
| b3867 | hemN | Isolate 1 | non-essential | coproporphyrinogen III oxidase, SAM and NAD(P)H dependent, oxygen-independent                                 | 2.31  |
| b3867 | hemN | Isolate 2 | non-essential | coproporphyrinogen III oxidase, SAM and NAD(P)H dependent, oxygen-independent                                 | -0.62 |
| b3868 | glnG | Isolate 1 | non-essential | fused DNA-binding response regulator in two-component regulatory system with GlnL, nitrogen regulator I (NRI) | 3.51  |
| b3868 | glnG | Isolate 2 | non-essential | fused DNA-binding response regulator in two-component regulatory system with GlnL, nitrogen regulator I (NRI) | -0.29 |
| b3869 | glnL | Isolate 1 | non-essential | sensory kinase in two-component regulatory system with GlnG                                                   | -1.93 |
| b3869 | glnL | Isolate 2 | non-essential | sensory kinase in two-component regulatory system with GlnG                                                   | -2.45 |
| b3870 | glnA | Isolate 1 | non-essential | glutamine synthetase                                                                                          | -2.05 |
| b3870 | glnA | Isolate 2 | non-essential | glutamine synthetase                                                                                          | -3.28 |
| b3871 | bipA | Isolate 1 | non-essential | GTP-binding protein                                                                                           | 1.98  |
| b3871 | bipA | Isolate 2 | non-essential | GTP-binding protein                                                                                           | 2.79  |
| b3872 | yihL | Isolate 1 | non-essential | predicted DNA-binding transcriptional regulator                                                               | 0.11  |
| b3872 | yihL | Isolate 2 | non-essential | predicted DNA-binding transcriptional regulator                                                               | 0.06  |
| b3873 | yihM | Isolate 1 | non-essential | predicted sugar phosphate isomerase                                                                           | -0.17 |
| b3873 | yihM | Isolate 2 | non-essential | predicted sugar phosphate isomerase                                                                           | -0.58 |
| b3874 | yihN | Isolate 1 | non-essential | predicted transporter                                                                                         | 0.06  |
| b3874 | yihN | Isolate 2 | non-essential | predicted transporter                                                                                         | -2.06 |
| b3875 | ompL | Isolate 1 | non-essential | predicted outer membrane porin L                                                                              | 2.29  |
| b3875 | ompL | Isolate 2 | non-essential | predicted outer membrane porin L                                                                              | 1.34  |
| b3876 | yihO | Isolate 1 | non-essential | predited transporter                                                                                          | 2.28  |
| b3876 | yihO | Isolate 2 | non-essential | predited transporter                                                                                          | 2.44  |
| b3877 | yihP | Isolate 1 | non-essential | predicted transporter                                                                                         | -0.25 |
| b3877 | yihP | Isolate 2 | non-essential | predicted transporter                                                                                         | 1.03  |
| b3878 | yihQ | Isolate 1 | non-essential | alpha-glucosidase                                                                                             | 0.83  |
| b3878 | yihQ | Isolate 2 | non-essential | alpha-glucosidase                                                                                             | 0.90  |
| b3879 | yihR | Isolate 1 | non-essential | predicted aldose-1-epimerase                                                                                  | 0.20  |
| b3879 | yihR | Isolate 2 | non-essential | predicted aldose-1-epimerase                                                                                  | 1.00  |
| b3880 | yihS | Isolate 1 | non-essential | predicted glucosamine isomerase                                                                               | 0.06  |
| b3880 | yihS | Isolate 2 | non-essential | predicted glucosamine isomerase                                                                               | 2.00  |
| b3881 | yihT | Isolate 1 | non-essential | predicted aldolase                                                                                            | 0.15  |
| b3881 | yihT | Isolate 2 | non-essential | predicted aldolase                                                                                            | 1.85  |
| b3882 | yihU | Isolate 1 | non-essential | predicted oxidoreductase with NAD(P)-binding Rossmann-fold domain                                             | 0.53  |
| b3882 | yihU | Isolate 2 | non-essential | predicted oxidoreductase with NAD(P)-binding Rossmann-fold domain                                             | 1.61  |
| b3883 | yihV | Isolate 1 | non-essential | predicted sugar kinase                                                                                        | 1.19  |
| b3883 | yihV | Isolate 2 | non-essential | predicted sugar kinase                                                                                        | 0.30  |
| b3884 | yihW | Isolate 1 | non-essential | predicted DNA-binding transcriptional regulator                                                               | 1.02  |
| b3884 | yihW | Isolate 2 | non-essential | predicted DNA-binding transcriptional regulator                                                               | 1.95  |
| b3885 | yihX | Isolate 1 | non-essential | predicted hydrolase                                                                                           | -0.43 |
| b3885 | yihX | Isolate 2 | non-essential | predicted hydrolase                                                                                           | 2.07  |
| b3886 | rbn  | Isolate 1 | non-essential | tRNA processing exoribonuclease BN                                                                            | -1.28 |
| b3886 | rbn  | Isolate 2 | non-essential | tRNA processing exoribonuclease BN                                                                            | 0.74  |
| b3887 | dtd  | Isolate 1 | non-essential | D-Tyr-tRNA(Tyr) deacylase                                                                                     | 1.52  |



|       |      |           |               |                                                                       |       |
|-------|------|-----------|---------------|-----------------------------------------------------------------------|-------|
| b3887 | dtd  | Isolate 2 | non-essential | D-Tyr-tRNA(Tyr) deacylase                                             | 1.57  |
| b3888 | yiiD | Isolate 1 | non-essential | predicted acetyltransferase                                           | 0.84  |
| b3888 | yiiD | Isolate 2 | non-essential | predicted acetyltransferase                                           | 1.35  |
| b3889 | yiiE | Isolate 1 | non-essential | predicted transcriptional regulator                                   | -0.89 |
| b3889 | yiiE | Isolate 2 | non-essential | predicted transcriptional regulator                                   | 1.29  |
| b3890 | yiiF | Isolate 1 | non-essential | conserved protein                                                     | -1.80 |
| b3890 | yiiF | Isolate 2 | non-essential | conserved protein                                                     | 1.13  |
| b3891 | fdhE | Isolate 1 | non-essential | formate dehydrogenase formation protein                               | -1.14 |
| b3891 | fdhE | Isolate 2 | non-essential | formate dehydrogenase formation protein                               | -1.79 |
| b3892 | fdoI | Isolate 1 | non-essential | formate dehydrogenase-O, cytochrome b556 subunit                      | 0.37  |
| b3892 | fdoI | Isolate 2 | non-essential | formate dehydrogenase-O, cytochrome b556 subunit                      | 0.58  |
| b3893 | fdoH | Isolate 1 | non-essential | formate dehydrogenase-O, Fe-S subunit                                 | 1.39  |
| b3893 | fdoH | Isolate 2 | non-essential | formate dehydrogenase-O, Fe-S subunit                                 | -0.32 |
| b3894 | fdoG | Isolate 1 | non-essential | formate dehydrogenase-O, large subunit                                | -0.39 |
| b3894 | fdoG | Isolate 2 | non-essential | formate dehydrogenase-O, large subunit                                | -1.18 |
| b3895 | fdhD | Isolate 1 | non-essential | formate dehydrogenase formation protein                               | -1.46 |
| b3895 | fdhD | Isolate 2 | non-essential | formate dehydrogenase formation protein                               | -0.37 |
| b3896 | yiiG | Isolate 1 | non-essential | conserved protein                                                     | 0.32  |
| b3896 | yiiG | Isolate 2 | non-essential | conserved protein                                                     | -0.81 |
| b3897 | frvR | Isolate 1 | non-essential | predicted regulator                                                   | -0.14 |
| b3897 | frvR | Isolate 2 | non-essential | predicted regulator                                                   | -1.07 |
| b3898 | frvX | Isolate 1 | non-essential | predicted endo-1,4-beta-glucanase                                     | 0.80  |
| b3898 | frvX | Isolate 2 | non-essential | predicted endo-1,4-beta-glucanase                                     | -0.70 |
| b3899 | frvB | Isolate 1 | non-essential | fused predicted PTS enzyme IIBC components                            | -0.57 |
| b3899 | frvB | Isolate 2 | non-essential | fused predicted PTS enzyme IIBC components                            | 1.59  |
| b3900 | frvA | Isolate 1 | non-essential | predicted enzyme IIA component of PTS                                 | -0.06 |
| b3900 | frvA | Isolate 2 | non-essential | predicted enzyme IIA component of PTS                                 | 1.23  |
| b3901 | yiiL | Isolate 1 | non-essential | L-rhamnose mutarotase                                                 | -1.63 |
| b3901 | yiiL | Isolate 2 | non-essential | L-rhamnose mutarotase                                                 | -1.29 |
| b3905 | rhaS | Isolate 1 | non-essential | DNA-binding transcriptional activator, L-rhamnose-binding             | 2.47  |
| b3905 | rhaS | Isolate 2 | non-essential | DNA-binding transcriptional activator, L-rhamnose-binding             | 2.48  |
| b3906 | rhaR | Isolate 1 | non-essential | DNA-binding transcriptional activator, L-rhamnose-binding             | -0.95 |
| b3906 | rhaR | Isolate 2 | non-essential | DNA-binding transcriptional activator, L-rhamnose-binding             | 1.25  |
| b3907 | rhaT | Isolate 1 | non-essential | L-rhamnose:proton symporter                                           | 0.93  |
| b3907 | rhaT | Isolate 2 | non-essential | L-rhamnose:proton symporter                                           | 2.96  |
| b3908 | sodA | Isolate 1 | non-essential | superoxide dismutase, Mn                                              | 2.57  |
| b3908 | sodA | Isolate 2 | non-essential | superoxide dismutase, Mn                                              | -0.61 |
| b3909 | kdgT | Isolate 1 | non-essential | 2-keto-3-deoxy-D-gluconate transporter                                | 1.08  |
| b3909 | kdgT | Isolate 2 | non-essential | 2-keto-3-deoxy-D-gluconate transporter                                | 0.41  |
| b3910 | yiiM | Isolate 1 | non-essential | conserved protein                                                     | 1.11  |
| b3910 | yiiM | Isolate 2 | non-essential | conserved protein                                                     | -1.26 |
| b3911 | cpxA | Isolate 1 | non-essential | sensory histidine kinase in two-component regulatory system with CpxR | -3.02 |
| b3911 | cpxA | Isolate 2 | non-essential | sensory histidine kinase in two-component regulatory system with CpxR | -3.42 |

|       |      |           |               |                                                                                  |       |
|-------|------|-----------|---------------|----------------------------------------------------------------------------------|-------|
| b3912 | cpxR | Isolate 1 | non-essential | DNA-binding response regulator in two-component regulatory system with CpxA      | -2.43 |
| b3912 | cpxR | Isolate 2 | non-essential | DNA-binding response regulator in two-component regulatory system with CpxA      | -0.82 |
| b3915 | fieF | Isolate 1 | non-essential | zinc transporter                                                                 | -0.32 |
| b3915 | fieF | Isolate 2 | non-essential | zinc transporter                                                                 | 0.85  |
| b3916 | pfkA | Isolate 1 | non-essential | 6-phosphofructokinase I                                                          | 1.16  |
| b3916 | pfkA | Isolate 2 | non-essential | 6-phosphofructokinase I                                                          | 0.00  |
| b3917 | sbp  | Isolate 1 | non-essential | sulfate transporter subunit -!- periplasmic-binding component of ABC superfamily | 0.62  |
| b3917 | sbp  | Isolate 2 | non-essential | sulfate transporter subunit -!- periplasmic-binding component of ABC superfamily | -1.11 |
| b3918 | cdh  | Isolate 1 | non-essential | CDP-diacylglycerol phosphotidylhydrolase                                         | 1.50  |
| b3918 | cdh  | Isolate 2 | non-essential | CDP-diacylglycerol phosphotidylhydrolase                                         | -1.62 |
| b3919 | tpiA | Isolate 1 | non-essential | triosephosphate isomerase                                                        | 0.64  |
| b3919 | tpiA | Isolate 2 | non-essential | triosephosphate isomerase                                                        | -1.93 |
| b3920 | yiiQ | Isolate 1 | non-essential | conserved protein                                                                | 0.58  |
| b3920 | yiiQ | Isolate 2 | non-essential | conserved protein                                                                | -1.11 |
| b3921 | yiiR | Isolate 1 | non-essential | conserved inner membrane protein                                                 | 0.38  |
| b3921 | yiiR | Isolate 2 | non-essential | conserved inner membrane protein                                                 | 1.04  |
| b3922 | yiiS | Isolate 1 | non-essential | conserved protein                                                                | 0.19  |
| b3922 | yiiS | Isolate 2 | non-essential | conserved protein                                                                | 0.80  |
| b3923 | yiiT | Isolate 1 | non-essential | stress-induced protein                                                           | 0.03  |
| b3923 | yiiT | Isolate 2 | non-essential | stress-induced protein                                                           | -0.51 |
| b3924 | fpr  | Isolate 1 | non-essential | ferredoxin-NADP reductase                                                        | -0.71 |
| b3924 | fpr  | Isolate 2 | non-essential | ferredoxin-NADP reductase                                                        | 0.99  |
| b3925 | glpX | Isolate 1 | non-essential | fructose 1,6-bisphosphatase II                                                   | -1.00 |
| b3925 | glpX | Isolate 2 | non-essential | fructose 1,6-bisphosphatase II                                                   | 0.07  |
| b3926 | glpK | Isolate 1 | non-essential | glycerol kinase                                                                  | 0.79  |
| b3926 | glpK | Isolate 2 | non-essential | glycerol kinase                                                                  | 0.38  |
| b3927 | glpF | Isolate 1 | non-essential | glycerol facilitator                                                             | 0.60  |
| b3927 | glpF | Isolate 2 | non-essential | glycerol facilitator                                                             | -0.83 |
| b3928 | yiiU | Isolate 1 | non-essential | conserved protein                                                                | 0.58  |
| b3928 | yiiU | Isolate 2 | non-essential | conserved protein                                                                | 1.35  |
| b3929 | rraA | Isolate 1 | non-essential | ribonuclease E (RNase E) inhibitor protein                                       | 0.81  |
| b3929 | rraA | Isolate 2 | non-essential | ribonuclease E (RNase E) inhibitor protein                                       | 1.27  |
| b3930 | menA | Isolate 1 | non-essential | 1,4-dihydroxy-2-naphthoate octaprenyltransferase                                 | 3.01  |
| b3930 | menA | Isolate 2 | non-essential | 1,4-dihydroxy-2-naphthoate octaprenyltransferase                                 | 0.82  |
| b3931 | hslU | Isolate 1 | non-essential | molecular chaperone and ATPase component of HslUV protease                       | -0.57 |
| b3931 | hslU | Isolate 2 | non-essential | molecular chaperone and ATPase component of HslUV protease                       | 0.33  |
| b3932 | hslV | Isolate 1 | non-essential | peptidase component of the HslUV protease                                        | 0.75  |
| b3932 | hslV | Isolate 2 | non-essential | peptidase component of the HslUV protease                                        | 2.08  |
| b3934 | cytR | Isolate 1 | non-essential | DNA-binding transcriptional dual regulator                                       | -0.47 |
| b3934 | cytR | Isolate 2 | non-essential | DNA-binding transcriptional dual regulator                                       | -0.72 |
| b3935 | priA | Isolate 1 | non-essential | Primosome factor n' (replication factor Y)                                       | 0.01  |
| b3935 | priA | Isolate 2 | non-essential | Primosome factor n' (replication factor Y)                                       | 0.05  |
| b3936 | rpmE | Isolate 1 | non-essential | 50S ribosomal subunit protein L31                                                | 0.50  |

|       |      |           |               |                                                                                           |       |
|-------|------|-----------|---------------|-------------------------------------------------------------------------------------------|-------|
| b3936 | rpmE | Isolate 2 | non-essential | 50S ribosomal subunit protein L31                                                         | 0.29  |
| b3937 | yiiX | Isolate 1 | non-essential | predicted peptidoglycan peptidase                                                         | 0.65  |
| b3937 | yiiX | Isolate 2 | non-essential | predicted peptidoglycan peptidase                                                         | 0.83  |
| b3938 | metJ | Isolate 1 | non-essential | DNA-binding transcriptional repressor, S-adenosylmethionine-binding                       | -1.08 |
| b3938 | metJ | Isolate 2 | non-essential | DNA-binding transcriptional repressor, S-adenosylmethionine-binding                       | 0.94  |
| b3939 | metB | Isolate 1 | non-essential | cystathionine gamma-synthase, PLP-dependent                                               | 0.58  |
| b3939 | metB | Isolate 2 | non-essential | cystathionine gamma-synthase, PLP-dependent                                               | 1.44  |
| b3940 | metL | Isolate 1 | non-essential | fused aspartokinase II -!- homoserine dehydrogenase II                                    | 0.00  |
| b3940 | metL | Isolate 2 | non-essential | fused aspartokinase II -!- homoserine dehydrogenase II                                    | 2.02  |
| b3941 | metF | Isolate 1 | non-essential | 5,10-methylenetetrahydrofolate reductase                                                  | -1.62 |
| b3941 | metF | Isolate 2 | non-essential | 5,10-methylenetetrahydrofolate reductase                                                  | -0.50 |
| b3942 | katG | Isolate 1 | non-essential | catalase/hydroperoxidase HPI(I)                                                           | 2.61  |
| b3942 | katG | Isolate 2 | non-essential | catalase/hydroperoxidase HPI(I)                                                           | -0.87 |
| b3943 | yijE | Isolate 1 | non-essential | predicted permease                                                                        | 1.60  |
| b3943 | yijE | Isolate 2 | non-essential | predicted permease                                                                        | 0.26  |
| b3944 | yijF | Isolate 1 | non-essential | conserved protein                                                                         | 1.61  |
| b3944 | yijF | Isolate 2 | non-essential | conserved protein                                                                         | 1.02  |
| b3945 | gldA | Isolate 1 | non-essential | glycerol dehydrogenase, NAD                                                               | -0.98 |
| b3945 | gldA | Isolate 2 | non-essential | glycerol dehydrogenase, NAD                                                               | -0.29 |
| b3946 | fsaB | Isolate 1 | non-essential | fructose-6-phosphate aldolase 2                                                           | 0.54  |
| b3946 | fsaB | Isolate 2 | non-essential | fructose-6-phosphate aldolase 2                                                           | 0.35  |
| b3947 | ptsA | Isolate 1 | non-essential | fused predicted PTS enzymes Hpr component -!- enzyme I component -!- enzyme IIA component | 1.26  |
| b3947 | ptsA | Isolate 2 | non-essential | fused predicted PTS enzymes Hpr component -!- enzyme I component -!- enzyme IIA component | 3.16  |
| b3949 | frwC | Isolate 1 | non-essential | predicted enzyme IIC component of PTS                                                     | 0.26  |
| b3949 | frwC | Isolate 2 | non-essential | predicted enzyme IIC component of PTS                                                     | 0.79  |
| b3950 | frwB | Isolate 1 | non-essential | predicted enzyme IIB component of PTS                                                     | -2.28 |
| b3950 | frwB | Isolate 2 | non-essential | predicted enzyme IIB component of PTS                                                     | -0.31 |
| b3951 | pflD | Isolate 1 | non-essential | predicted formate acetyltransferase 2 (pyruvate formate lyase II)                         | -0.72 |
| b3951 | pflD | Isolate 2 | non-essential | predicted formate acetyltransferase 2 (pyruvate formate lyase II)                         | -0.85 |
| b3952 | pflC | Isolate 1 | non-essential | pyruvate formate lyase II activase                                                        | -1.34 |
| b3952 | pflC | Isolate 2 | non-essential | pyruvate formate lyase II activase                                                        | -1.82 |
| b3953 | frwD | Isolate 1 | non-essential | predicted enzyme IIB component of PTS                                                     | -0.59 |
| b3953 | frwD | Isolate 2 | non-essential | predicted enzyme IIB component of PTS                                                     | -0.36 |
| b3954 | yijO | Isolate 1 | non-essential | predicted DNA-binding transcriptional regulator                                           | -0.14 |
| b3954 | yijO | Isolate 2 | non-essential | predicted DNA-binding transcriptional regulator                                           | -0.53 |
| b3955 | yijP | Isolate 1 | non-essential | conserved inner membrane protein                                                          | -0.61 |
| b3955 | yijP | Isolate 2 | non-essential | conserved inner membrane protein                                                          | 0.11  |
| b3956 | ppc  | Isolate 1 | non-essential | phosphoenolpyruvate carboxylase                                                           | 1.91  |
| b3956 | ppc  | Isolate 2 | non-essential | phosphoenolpyruvate carboxylase                                                           | 2.69  |
| b3957 | argE | Isolate 1 | non-essential | acetylornithine deacetylase                                                               | 0.99  |
| b3957 | argE | Isolate 2 | non-essential | acetylornithine deacetylase                                                               | 1.36  |
| b3958 | argC | Isolate 1 | non-essential | N-acetyl-gamma-glutamylphosphate reductase, NAD(P)-binding                                | 0.46  |
| b3958 | argC | Isolate 2 | non-essential | N-acetyl-gamma-glutamylphosphate reductase, NAD(P)-binding                                | -1.16 |

|       |      |           |               |                                                                                                                                 |       |
|-------|------|-----------|---------------|---------------------------------------------------------------------------------------------------------------------------------|-------|
| b3959 | argB | Isolate 1 | non-essential | acetylglutamate kinase                                                                                                          | -0.36 |
| b3959 | argB | Isolate 2 | non-essential | acetylglutamate kinase                                                                                                          | -0.27 |
| b3960 | argH | Isolate 1 | non-essential | argininosuccinate lyase                                                                                                         | 2.71  |
| b3960 | argH | Isolate 2 | non-essential | argininosuccinate lyase                                                                                                         | 2.06  |
| b3961 | oxyR | Isolate 1 | non-essential | DNA-binding transcriptional dual regulator                                                                                      | 1.34  |
| b3961 | oxyR | Isolate 2 | non-essential | DNA-binding transcriptional dual regulator                                                                                      | -0.46 |
| b3962 | sthA | Isolate 1 | non-essential | pyridine nucleotide transhydrogenase, soluble                                                                                   | -1.18 |
| b3962 | sthA | Isolate 2 | non-essential | pyridine nucleotide transhydrogenase, soluble                                                                                   | -0.94 |
| b3963 | fabR | Isolate 1 | non-essential | DNA-binding transcriptional repressor                                                                                           | 0.22  |
| b3963 | fabR | Isolate 2 | non-essential | DNA-binding transcriptional repressor                                                                                           | -0.26 |
| b3964 | yijD | Isolate 1 | non-essential | conserved inner membrane protein                                                                                                | 0.91  |
| b3964 | yijD | Isolate 2 | non-essential | conserved inner membrane protein                                                                                                | -0.44 |
| b3965 | trmA | Isolate 1 | non-essential | tRNA (uracil-5-)-methyltransferase                                                                                              | 0.59  |
| b3965 | trmA | Isolate 2 | non-essential | tRNA (uracil-5-)-methyltransferase                                                                                              | -0.28 |
| b3966 | btuB | Isolate 1 | non-essential | vitamin B12/cobalamin outer membrane transporter                                                                                | 2.39  |
| b3966 | btuB | Isolate 2 | non-essential | vitamin B12/cobalamin outer membrane transporter                                                                                | 1.30  |
| b3967 | murI | Isolate 1 | essential     | glutamate racemase                                                                                                              | 1.98  |
| b3972 | murB | Isolate 1 | essential     | UDP-N-acetylenolpyruvoylglucosamine reductase, FAD-binding                                                                      | 3.47  |
| b3973 | birA | Isolate 1 | essential     | bifunctional biotin-[acetylCoA carboxylase] holoenzyme synthetase -!- DNA-binding transcriptional repressor, bio-5'-AMP-binding | -0.33 |
| b3974 | coaA | Isolate 1 | non-essential | pantothenate kinase                                                                                                             | 1.67  |
| b3974 | coaA | Isolate 2 | non-essential | pantothenate kinase                                                                                                             | 0.63  |
| b3980 | tufB | Isolate 1 | non-essential | protein chain elongation factor EF-Tu (duplicate of tufA)                                                                       | 2.14  |
| b3980 | tufB | Isolate 2 | non-essential | protein chain elongation factor EF-Tu (duplicate of tufA)                                                                       | 2.91  |
| b3982 | nusG | Isolate 1 | essential     | transcription termination factor                                                                                                | -0.30 |
| b3983 | rplK | Isolate 1 | non-essential | 50S ribosomal subunit protein L11                                                                                               | 3.40  |
| b3983 | rplK | Isolate 2 | non-essential | 50S ribosomal subunit protein L11                                                                                               | 1.81  |
| b3984 | rplA | Isolate 1 | non-essential | 50S ribosomal subunit protein L1                                                                                                | 0.02  |
| b3984 | rplA | Isolate 2 | non-essential | 50S ribosomal subunit protein L1                                                                                                | -0.90 |
| b3987 | rpoB | Isolate 1 | essential     | RNA polymerase, beta subunit                                                                                                    | -1.09 |
| b3988 | rpoC | Isolate 1 | essential     | RNA polymerase, beta prime subunit                                                                                              | 0.90  |
| b3989 | htrC | Isolate 1 | non-essential | heat shock protein                                                                                                              | 0.08  |
| b3989 | htrC | Isolate 2 | non-essential | heat shock protein                                                                                                              | 2.34  |
| b3990 | thiH | Isolate 1 | non-essential | thiamin biosynthesis ThiGH complex subunit                                                                                      | 1.04  |
| b3990 | thiH | Isolate 2 | non-essential | thiamin biosynthesis ThiGH complex subunit                                                                                      | 0.75  |
| b3991 | thiG | Isolate 1 | non-essential | thiamin biosynthesis ThiGH complex subunit                                                                                      | 1.62  |
| b3991 | thiG | Isolate 2 | non-essential | thiamin biosynthesis ThiGH complex subunit                                                                                      | 1.94  |
| b3992 | thiF | Isolate 1 | non-essential | thiamin (thiazole moiety) biosynthesis protein                                                                                  | 1.71  |
| b3992 | thiF | Isolate 2 | non-essential | thiamin (thiazole moiety) biosynthesis protein                                                                                  | 0.09  |
| b3993 | thiE | Isolate 1 | non-essential | thiamin phosphate synthase (thiamin phosphate pyrophosphorylase)                                                                | 1.96  |
| b3993 | thiE | Isolate 2 | non-essential | thiamin phosphate synthase (thiamin phosphate pyrophosphorylase)                                                                | 1.14  |
| b3994 | thiC | Isolate 1 | non-essential | thiamin (pyrimidine moiety) biosynthesis protein                                                                                | 1.30  |
| b3994 | thiC | Isolate 2 | non-essential | thiamin (pyrimidine moiety) biosynthesis protein                                                                                | 1.11  |
| b3995 | rsd  | Isolate 1 | non-essential | stationary phase protein, binds sigma 70 RNA polymerase subunit                                                                 | 1.63  |

|       |      |           |               |                                                                                        |       |
|-------|------|-----------|---------------|----------------------------------------------------------------------------------------|-------|
| b3995 | rsd  | Isolate 2 | non-essential | stationary phase protein, binds sigma 70 RNA polymerase subunit                        | -0.09 |
| b3996 | nudC | Isolate 1 | non-essential | NADH pyrophosphatase                                                                   | -0.25 |
| b3996 | nudC | Isolate 2 | non-essential | NADH pyrophosphatase                                                                   | -0.99 |
| b3997 | hemE | Isolate 1 | non-essential | uroporphyrinogen decarboxylase                                                         | 2.77  |
| b3997 | hemE | Isolate 2 | non-essential | uroporphyrinogen decarboxylase                                                         | 0.75  |
| b3998 | nfi  | Isolate 1 | non-essential | endonuclease V                                                                         | 0.88  |
| b3998 | nfi  | Isolate 2 | non-essential | endonuclease V                                                                         | 0.51  |
| b3999 | yjaG | Isolate 1 | non-essential | conserved protein                                                                      | -0.33 |
| b3999 | yjaG | Isolate 2 | non-essential | conserved protein                                                                      | -0.79 |
| b4000 | hupA | Isolate 1 | non-essential | HU, DNA-binding transcriptional regulator, alpha subunit                               | 3.64  |
| b4000 | hupA | Isolate 2 | non-essential | HU, DNA-binding transcriptional regulator, alpha subunit                               | 0.93  |
| b4001 | yjaH | Isolate 1 | non-essential | conserved protein                                                                      | 1.35  |
| b4001 | yjaH | Isolate 2 | non-essential | conserved protein                                                                      | 0.36  |
| b4002 | zraP | Isolate 1 | non-essential | Zn-binding periplasmic protein                                                         | 0.93  |
| b4002 | zraP | Isolate 2 | non-essential | Zn-binding periplasmic protein                                                         | 1.28  |
| b4003 | zraS | Isolate 1 | non-essential | sensory histidine kinase in two-component regulatory system with ZraR                  | -1.81 |
| b4003 | zraS | Isolate 2 | non-essential | sensory histidine kinase in two-component regulatory system with ZraR                  | 0.49  |
| b4004 | zraR | Isolate 1 | non-essential | fused DNA-binding response regulator in two-component regulatory system with ZraS      | -1.40 |
| b4004 | zraR | Isolate 2 | non-essential | fused DNA-binding response regulator in two-component regulatory system with ZraS      | -0.49 |
| b4005 | purD | Isolate 1 | non-essential | phosphoribosylglycinamide synthetase phosphoribosylamine-glycine ligase                | -1.83 |
| b4005 | purD | Isolate 2 | non-essential | phosphoribosylglycinamide synthetase phosphoribosylamine-glycine ligase                | -1.30 |
| b4006 | purH | Isolate 1 | non-essential | fused IMP cyclohydrolase -!- phosphoribosylaminoimidazolecarboxamide formyltransferase | -2.16 |
| b4006 | purH | Isolate 2 | non-essential | fused IMP cyclohydrolase -!- phosphoribosylaminoimidazolecarboxamide formyltransferase | -2.07 |
| b4011 | yjaA | Isolate 1 | non-essential | conserved protein                                                                      | 1.61  |
| b4011 | yjaA | Isolate 2 | non-essential | conserved protein                                                                      | 0.65  |
| b4012 | yjaB | Isolate 1 | non-essential | predicted acetyltransferase                                                            | -1.46 |
| b4012 | yjaB | Isolate 2 | non-essential | predicted acetyltransferase                                                            | 0.00  |
| b4013 | metA | Isolate 1 | non-essential | homoserine transsuccinylase                                                            | -0.89 |
| b4013 | metA | Isolate 2 | non-essential | homoserine transsuccinylase                                                            | 1.30  |
| b4014 | aceB | Isolate 1 | non-essential | malate synthase A                                                                      | -0.88 |
| b4014 | aceB | Isolate 2 | non-essential | malate synthase A                                                                      | -0.13 |
| b4015 | aceA | Isolate 1 | non-essential | isocitrate lyase                                                                       | 0.90  |
| b4015 | aceA | Isolate 2 | non-essential | isocitrate lyase                                                                       | 0.38  |
| b4016 | aceK | Isolate 1 | non-essential | isocitrate dehydrogenase kinase/phosphatase                                            | 1.21  |
| b4016 | aceK | Isolate 2 | non-essential | isocitrate dehydrogenase kinase/phosphatase                                            | -0.47 |
| b4017 | arpA | Isolate 1 | non-essential | regulator of acetyl CoA synthetase                                                     | -0.23 |
| b4017 | arpA | Isolate 2 | non-essential | regulator of acetyl CoA synthetase                                                     | -1.00 |
| b4018 | iclR | Isolate 1 | non-essential | DNA-binding transcriptional repressor                                                  | 0.50  |
| b4018 | iclR | Isolate 2 | non-essential | DNA-binding transcriptional repressor                                                  | 0.68  |
| b4019 | metH | Isolate 1 | non-essential | homocysteine-N5-methyltetrahydrofolate transmethylase, B12-dependent                   | -0.88 |
| b4019 | metH | Isolate 2 | non-essential | homocysteine-N5-methyltetrahydrofolate transmethylase, B12-dependent                   | -0.23 |
| b4020 | yjbB | Isolate 1 | non-essential | predicted transporter                                                                  | 0.85  |
| b4020 | yjbB | Isolate 2 | non-essential | predicted transporter                                                                  | 2.13  |

|       |      |           |               |                                                                                                  |       |
|-------|------|-----------|---------------|--------------------------------------------------------------------------------------------------|-------|
| b4021 | pepE | Isolate 1 | non-essential | (alpha)-aspartyl dipeptidase                                                                     | -0.98 |
| b4021 | pepE | Isolate 2 | non-essential | (alpha)-aspartyl dipeptidase                                                                     | -1.36 |
| b4022 | yjbC | Isolate 1 | non-essential | 23S rRNA pseudouridine synthase                                                                  | 0.30  |
| b4022 | yjbC | Isolate 2 | non-essential | 23S rRNA pseudouridine synthase                                                                  | -0.04 |
| b4023 | yjbD | Isolate 1 | non-essential | conserved protein                                                                                | -0.74 |
| b4023 | yjbD | Isolate 2 | non-essential | conserved protein                                                                                | -0.25 |
| b4024 | lysC | Isolate 1 | non-essential | aspartokinase III                                                                                | -0.83 |
| b4024 | lysC | Isolate 2 | non-essential | aspartokinase III                                                                                | -1.20 |
| b4025 | pgi  | Isolate 1 | non-essential | glucosephosphate isomerase                                                                       | 1.02  |
| b4025 | pgi  | Isolate 2 | non-essential | glucosephosphate isomerase                                                                       | 1.88  |
| b4026 | yjbE | Isolate 1 | non-essential | predicted protein                                                                                | -0.19 |
| b4026 | yjbE | Isolate 2 | non-essential | predicted protein                                                                                | 0.55  |
| b4027 | yjbF | Isolate 1 | non-essential | predicted lipoprotein                                                                            | 2.08  |
| b4027 | yjbF | Isolate 2 | non-essential | predicted lipoprotein                                                                            | 0.59  |
| b4028 | yjbG | Isolate 1 | non-essential | conserved protein                                                                                | -0.31 |
| b4028 | yjbG | Isolate 2 | non-essential | conserved protein                                                                                | -0.02 |
| b4029 | yjbH | Isolate 1 | non-essential | predicted porin                                                                                  | -0.99 |
| b4029 | yjbH | Isolate 2 | non-essential | predicted porin                                                                                  | -0.69 |
| b4030 | yjbA | Isolate 1 | non-essential | predicted phosphate starvation inducible protein                                                 | -0.51 |
| b4030 | yjbA | Isolate 2 | non-essential | predicted phosphate starvation inducible protein                                                 | -0.24 |
| b4031 | xylE | Isolate 1 | non-essential | D-xylose transporter                                                                             | 0.13  |
| b4031 | xylE | Isolate 2 | non-essential | D-xylose transporter                                                                             | 0.59  |
| b4032 | malG | Isolate 1 | non-essential | maltose transporter subunit -!- membrane component of ABC superfamily                            | 1.64  |
| b4032 | malG | Isolate 2 | non-essential | maltose transporter subunit -!- membrane component of ABC superfamily                            | -0.84 |
| b4033 | malF | Isolate 1 | non-essential | maltose transporter subunit -!- membrane component of ABC superfamily                            | -0.34 |
| b4033 | malF | Isolate 2 | non-essential | maltose transporter subunit -!- membrane component of ABC superfamily                            | 1.75  |
| b4034 | malE | Isolate 1 | non-essential | maltose transporter subunit -!- periplasmic-binding component of ABC superfamily                 | -0.18 |
| b4034 | malE | Isolate 2 | non-essential | maltose transporter subunit -!- periplasmic-binding component of ABC superfamily                 | -1.05 |
| b4035 | malK | Isolate 1 | non-essential | fused maltose transport subunit, ATP-binding component of ABC superfamily -!- regulatory protein | 0.50  |
| b4035 | malK | Isolate 2 | non-essential | fused maltose transport subunit, ATP-binding component of ABC superfamily -!- regulatory protein | -0.72 |
| b4036 | lamB | Isolate 1 | non-essential | maltose outer membrane porin (maltoporin)                                                        | -0.29 |
| b4036 | lamB | Isolate 2 | non-essential | maltose outer membrane porin (maltoporin)                                                        | -2.35 |
| b4037 | malM | Isolate 1 | non-essential | maltose regulon periplasmic protein                                                              | -0.02 |
| b4037 | malM | Isolate 2 | non-essential | maltose regulon periplasmic protein                                                              | -0.68 |
| b4038 | yjbI | Isolate 1 | non-essential | conserved protein                                                                                | -0.97 |
| b4038 | yjbI | Isolate 2 | non-essential | conserved protein                                                                                | -0.18 |
| b4039 | ubiC | Isolate 1 | non-essential | chorismate pyruvate lyase                                                                        | 0.64  |
| b4039 | ubiC | Isolate 2 | non-essential | chorismate pyruvate lyase                                                                        | -0.07 |
| b4042 | dgkA | Isolate 1 | non-essential | diacylglycerol kinase                                                                            | -1.53 |
| b4042 | dgkA | Isolate 2 | non-essential | diacylglycerol kinase                                                                            | 0.91  |
| b4043 | lexA | Isolate 1 | essential     | DNA-binding transcriptional repressor                                                            | -0.47 |
| b4044 | dinF | Isolate 1 | non-essential | DNA-damage-inducible SOS response protein                                                        | -1.46 |
| b4044 | dinF | Isolate 2 | non-essential | DNA-damage-inducible SOS response protein                                                        | -0.96 |

|         |      |           |               |                                                                                             |       |
|---------|------|-----------|---------------|---------------------------------------------------------------------------------------------|-------|
| b4045   | yjbJ | Isolate 1 | non-essential | predicted stress response protein                                                           | -1.00 |
| b4045   | yjbJ | Isolate 2 | non-essential | predicted stress response protein                                                           | -0.77 |
| b4046   | zur  | Isolate 1 | non-essential | DNA-binding transcriptional activator, Zn(II)-binding                                       | 2.56  |
| b4046   | zur  | Isolate 2 | non-essential | DNA-binding transcriptional activator, Zn(II)-binding                                       | 0.65  |
| b4047   | yjbL | Isolate 1 | non-essential | predicted protein                                                                           | 1.40  |
| b4047   | yjbL | Isolate 2 | non-essential | predicted protein                                                                           | -1.13 |
| b4048   | yjbM | Isolate 1 | non-essential | predicted protein                                                                           | -0.72 |
| b4048   | yjbM | Isolate 2 | non-essential | predicted protein                                                                           | 0.42  |
| b4049   | yjbN | Isolate 1 | non-essential | tRNA-dihydrouridine synthase A                                                              | 1.27  |
| b4049   | yjbN | Isolate 2 | non-essential | tRNA-dihydrouridine synthase A                                                              | 1.41  |
| b4050   | yjbO | Isolate 1 | non-essential | phage shock protein G                                                                       | 1.34  |
| b4050   | yjbO | Isolate 2 | non-essential | phage shock protein G                                                                       | -1.55 |
| b4051   | qor  | Isolate 1 | non-essential | quinone oxidoreductase, NADPH-dependent                                                     | 0.98  |
| b4051   | qor  | Isolate 2 | non-essential | quinone oxidoreductase, NADPH-dependent                                                     | 0.85  |
| b4052   | dnaB | Isolate 1 | essential     | replicative DNA helicase                                                                    | 5.69  |
| b4053   | alr  | Isolate 1 | non-essential | alanine racemase 1, PLP-binding, biosynthetic                                               | 1.03  |
| b4053   | alr  | Isolate 2 | non-essential | alanine racemase 1, PLP-binding, biosynthetic                                               | 0.52  |
| b4054   | tyrB | Isolate 1 | non-essential | tyrosine aminotransferase, tyrosine-repressible, PLP-dependent                              | 0.64  |
| b4054   | tyrB | Isolate 2 | non-essential | tyrosine aminotransferase, tyrosine-repressible, PLP-dependent                              | 0.10  |
| b4054.1 | *    | Isolate 1 | *             | *                                                                                           | 0.93  |
| b4054.1 | *    | Isolate 2 | *             | *                                                                                           | 0.28  |
| b4055   | aphA | Isolate 1 | non-essential | acid phosphatase/phosphotransferase, class B, non-specific                                  | -1.93 |
| b4055   | aphA | Isolate 2 | non-essential | acid phosphatase/phosphotransferase, class B, non-specific                                  | -0.68 |
| b4056   | yjbQ | Isolate 1 | non-essential | conserved protein                                                                           | -0.82 |
| b4056   | yjbQ | Isolate 2 | non-essential | conserved protein                                                                           | 0.48  |
| b4057   | yjbR | Isolate 1 | non-essential | conserved protein                                                                           | -0.88 |
| b4057   | yjbR | Isolate 2 | non-essential | conserved protein                                                                           | -0.61 |
| b4058   | uvrA | Isolate 1 | non-essential | ATPase and DNA damage recognition protein of nucleotide excision repair excinuclease UvrABC | -0.61 |
| b4058   | uvrA | Isolate 2 | non-essential | ATPase and DNA damage recognition protein of nucleotide excision repair excinuclease UvrABC | 1.70  |
| b4059   | ssb  | Isolate 1 | essential     | Single-stranded DNA-binding protein                                                         | 4.24  |
| b4060   | yjcB | Isolate 1 | non-essential | predicted inner membrane protein                                                            | -0.24 |
| b4060   | yjcB | Isolate 2 | non-essential | predicted inner membrane protein                                                            | 0.76  |
| b4061   | yjcC | Isolate 1 | non-essential | predicted signal transduction protein (EAL domain containing protein)                       | 0.12  |
| b4061   | yjcC | Isolate 2 | non-essential | predicted signal transduction protein (EAL domain containing protein)                       | -1.97 |
| b4062   | soxS | Isolate 1 | non-essential | DNA-binding transcriptional dual regulator                                                  | 1.03  |
| b4062   | soxS | Isolate 2 | non-essential | DNA-binding transcriptional dual regulator                                                  | -1.59 |
| b4063   | soxR | Isolate 1 | non-essential | DNA-binding transcriptional dual regulator, Fe-S center for redox-sensing                   | 1.24  |
| b4063   | soxR | Isolate 2 | non-essential | DNA-binding transcriptional dual regulator, Fe-S center for redox-sensing                   | 2.24  |
| b4064   | yjcD | Isolate 1 | non-essential | predicted permease                                                                          | -0.07 |
| b4064   | yjcD | Isolate 2 | non-essential | predicted permease                                                                          | -2.55 |
| b4065   | yjcE | Isolate 1 | non-essential | predicted cation/proton antiporter                                                          | -0.53 |
| b4065   | yjcE | Isolate 2 | non-essential | predicted cation/proton antiporter                                                          | 1.75  |
| b4066   | yjcF | Isolate 1 | non-essential | conserved protein                                                                           | -1.36 |

|       |      |           |               |                                                                                   |       |
|-------|------|-----------|---------------|-----------------------------------------------------------------------------------|-------|
| b4066 | yjcF | Isolate 2 | non-essential | conserved protein                                                                 | 0.99  |
| b4067 | actP | Isolate 1 | non-essential | acetate transporter                                                               | -0.71 |
| b4067 | actP | Isolate 2 | non-essential | acetate transporter                                                               | -0.27 |
| b4068 | yjcH | Isolate 1 | non-essential | conserved inner membrane protein involved in acetate transport                    | -0.33 |
| b4068 | yjcH | Isolate 2 | non-essential | conserved inner membrane protein involved in acetate transport                    | -0.94 |
| b4069 | acs  | Isolate 1 | non-essential | bifunctional acetyl-CoA synthetase -!- propionyl-CoA synthetase                   | -0.55 |
| b4069 | acs  | Isolate 2 | non-essential | bifunctional acetyl-CoA synthetase -!- propionyl-CoA synthetase                   | -0.06 |
| b4070 | nrfA | Isolate 1 | non-essential | nitrite reductase, formate-dependent, cytochrome                                  | 0.25  |
| b4070 | nrfA | Isolate 2 | non-essential | nitrite reductase, formate-dependent, cytochrome                                  | -1.67 |
| b4071 | nrfB | Isolate 1 | non-essential | nitrite reductase, formate-dependent, penta-heme cytochrome c                     | -0.15 |
| b4071 | nrfB | Isolate 2 | non-essential | nitrite reductase, formate-dependent, penta-heme cytochrome c                     | 1.52  |
| b4072 | nrfC | Isolate 1 | non-essential | formate-dependent nitrite reductase, 4Fe4S subunit                                | 0.38  |
| b4072 | nrfC | Isolate 2 | non-essential | formate-dependent nitrite reductase, 4Fe4S subunit                                | -0.87 |
| b4073 | nrfD | Isolate 1 | non-essential | formate-dependent nitrite reductase, membrane subunit                             | 0.59  |
| b4073 | nrfD | Isolate 2 | non-essential | formate-dependent nitrite reductase, membrane subunit                             | 1.54  |
| b4074 | nrfE | Isolate 1 | non-essential | heme lyase (NrfEFG) for insertion of heme into c552, subunit NrfE                 | 1.53  |
| b4074 | nrfE | Isolate 2 | non-essential | heme lyase (NrfEFG) for insertion of heme into c552, subunit NrfE                 | 0.48  |
| b4075 | nrfF | Isolate 1 | non-essential | heme lyase (NrfEFG) for insertion of heme into c552, subunit NrfF                 | 0.58  |
| b4075 | nrfF | Isolate 2 | non-essential | heme lyase (NrfEFG) for insertion of heme into c552, subunit NrfF                 | 0.48  |
| b4076 | nrfG | Isolate 1 | non-essential | heme lyase (NrfEFG) for insertion of heme into c552, subunit NrfG                 | 2.17  |
| b4076 | nrfG | Isolate 2 | non-essential | heme lyase (NrfEFG) for insertion of heme into c552, subunit NrfG                 | 0.29  |
| b4077 | gltP | Isolate 1 | non-essential | glutamate/aspartate:proton symporter                                              | -0.91 |
| b4077 | gltP | Isolate 2 | non-essential | glutamate/aspartate:proton symporter                                              | 0.14  |
| b4078 | yjcO | Isolate 1 | non-essential | conserved protein                                                                 | -1.85 |
| b4078 | yjcO | Isolate 2 | non-essential | conserved protein                                                                 | 0.32  |
| b4079 | fdhF | Isolate 1 | non-essential | formate dehydrogenase-H, selenopolypeptide subunit                                | -3.05 |
| b4079 | fdhF | Isolate 2 | non-essential | formate dehydrogenase-H, selenopolypeptide subunit                                | -0.70 |
| b4080 | yjcP | Isolate 1 | non-essential | predicted outer membrane factor of efflux pump                                    | -1.76 |
| b4080 | yjcP | Isolate 2 | non-essential | predicted outer membrane factor of efflux pump                                    | -0.42 |
| b4081 | yjcQ | Isolate 1 | non-essential | predicted multidrug efflux system component                                       | 2.43  |
| b4081 | yjcQ | Isolate 2 | non-essential | predicted multidrug efflux system component                                       | 0.00  |
| b4082 | yjcR | Isolate 1 | non-essential | predicted membrane fusion protein of efflux pump                                  | -3.56 |
| b4082 | yjcR | Isolate 2 | non-essential | predicted membrane fusion protein of efflux pump                                  | 0.55  |
| b4083 | yjcS | Isolate 1 | non-essential | predicted alkyl sulfatase                                                         | -0.31 |
| b4083 | yjcS | Isolate 2 | non-essential | predicted alkyl sulfatase                                                         | 0.47  |
| b4084 | alsK | Isolate 1 | essential     | D-allose kinase                                                                   | -0.39 |
| b4085 | alsE | Isolate 1 | non-essential | allulose-6-phosphate 3-epimerase                                                  | 0.25  |
| b4085 | alsE | Isolate 2 | non-essential | allulose-6-phosphate 3-epimerase                                                  | 0.07  |
| b4086 | alsC | Isolate 1 | non-essential | D-allose transporter subunit -!- membrane component of ABC superfamily            | 0.32  |
| b4086 | alsC | Isolate 2 | non-essential | D-allose transporter subunit -!- membrane component of ABC superfamily            | 0.57  |
| b4087 | alsA | Isolate 1 | non-essential | fused D-allose transporter subunits -!- ATP-binding components of ABC superfamily | -1.24 |
| b4087 | alsA | Isolate 2 | non-essential | fused D-allose transporter subunits -!- ATP-binding components of ABC superfamily | -0.88 |
| b4088 | alsB | Isolate 1 | non-essential | D-allose transporter subunit -!- periplasmic-binding component of ABC superfamily | 1.73  |



|       |      |           |               |                                                                                                            |       |
|-------|------|-----------|---------------|------------------------------------------------------------------------------------------------------------|-------|
| b4088 | alsB | Isolate 2 | non-essential | D-allose transporter subunit -!- periplasmic-binding component of ABC superfamily                          | -0.51 |
| b4089 | rpiR | Isolate 1 | non-essential | DNA-binding transcriptional repressor                                                                      | 1.36  |
| b4089 | rpiR | Isolate 2 | non-essential | DNA-binding transcriptional repressor                                                                      | -1.91 |
| b4090 | rpiB | Isolate 1 | non-essential | ribose 5-phosphate isomerase B/allose 6-phosphate isomerase                                                | 0.23  |
| b4090 | rpiB | Isolate 2 | non-essential | ribose 5-phosphate isomerase B/allose 6-phosphate isomerase                                                | -0.42 |
| b4091 | *    | Isolate 1 | *             | *                                                                                                          | -2.02 |
| b4091 | *    | Isolate 2 | *             | *                                                                                                          | -0.82 |
| b4092 | phnP | Isolate 1 | non-essential | carbon-phosphorus lyase complex accessory protein                                                          | -1.74 |
| b4092 | phnP | Isolate 2 | non-essential | carbon-phosphorus lyase complex accessory protein                                                          | -2.92 |
| b4093 | phnO | Isolate 1 | non-essential | predicted acyltransferase with acyl-CoA N-acyltransferase domain                                           | -0.97 |
| b4093 | phnO | Isolate 2 | non-essential | predicted acyltransferase with acyl-CoA N-acyltransferase domain                                           | -0.09 |
| b4094 | phnN | Isolate 1 | non-essential | ribose 1,5-bisphosphokinase                                                                                | -4.38 |
| b4094 | phnN | Isolate 2 | non-essential | ribose 1,5-bisphosphokinase                                                                                | 0.11  |
| b4095 | phnM | Isolate 1 | non-essential | carbon-phosphorus lyase complex subunit                                                                    | -0.29 |
| b4095 | phnM | Isolate 2 | non-essential | carbon-phosphorus lyase complex subunit                                                                    | 0.71  |
| b4096 | phnL | Isolate 1 | non-essential | carbon-phosphorus lyase complex subunit                                                                    | 0.06  |
| b4096 | phnL | Isolate 2 | non-essential | carbon-phosphorus lyase complex subunit                                                                    | -1.31 |
| b4097 | phnK | Isolate 1 | non-essential | carbon-phosphorus lyase complex subunit                                                                    | -0.57 |
| b4097 | phnK | Isolate 2 | non-essential | carbon-phosphorus lyase complex subunit                                                                    | -1.29 |
| b4098 | phnJ | Isolate 1 | non-essential | carbon-phosphorus lyase complex subunit                                                                    | -0.35 |
| b4098 | phnJ | Isolate 2 | non-essential | carbon-phosphorus lyase complex subunit                                                                    | -0.11 |
| b4099 | phnI | Isolate 1 | non-essential | carbon-phosphorus lyase complex subunit                                                                    | -1.07 |
| b4099 | phnI | Isolate 2 | non-essential | carbon-phosphorus lyase complex subunit                                                                    | -0.54 |
| b4100 | phnH | Isolate 1 | non-essential | carbon-phosphorus lyase complex subunit                                                                    | -2.02 |
| b4100 | phnH | Isolate 2 | non-essential | carbon-phosphorus lyase complex subunit                                                                    | 0.51  |
| b4101 | phnG | Isolate 1 | non-essential | carbon-phosphorus lyase complex subunit                                                                    | 0.38  |
| b4101 | phnG | Isolate 2 | non-essential | carbon-phosphorus lyase complex subunit                                                                    | -1.29 |
| b4102 | phnF | Isolate 1 | non-essential | transcriptional regulator of phosphonate uptake and biodegradation                                         | 0.84  |
| b4102 | phnF | Isolate 2 | non-essential | transcriptional regulator of phosphonate uptake and biodegradation                                         | 0.30  |
| b4103 | phnE | Isolate 1 | *             | phosphonate/organophosphate ester transporter (pseudogene)                                                 | 0.01  |
| b4103 | phnE | Isolate 2 | *             | phosphonate/organophosphate ester transporter (pseudogene)                                                 | 0.82  |
| b4105 | phnD | Isolate 1 | non-essential | phosphonate/organophosphate ester transporter subunit -!- periplasmic binding component of ABC superfamily | 0.05  |
| b4105 | phnD | Isolate 2 | non-essential | phosphonate/organophosphate ester transporter subunit -!- periplasmic binding component of ABC superfamily | -0.40 |
| b4106 | phnC | Isolate 1 | non-essential | phosphonate/organophosphate ester transporter subunit -!- ATP-binding component of ABC superfamily         | 1.21  |
| b4106 | phnC | Isolate 2 | non-essential | phosphonate/organophosphate ester transporter subunit -!- ATP-binding component of ABC superfamily         | -0.74 |
| b4107 | phnB | Isolate 1 | non-essential | conserved protein                                                                                          | 2.04  |
| b4107 | phnB | Isolate 2 | non-essential | conserved protein                                                                                          | -3.36 |
| b4108 | phnA | Isolate 1 | non-essential | predicted phosphonate metabolizing protein                                                                 | 0.01  |
| b4108 | phnA | Isolate 2 | non-essential | predicted phosphonate metabolizing protein                                                                 | 0.20  |
| b4109 | yjdA | Isolate 1 | non-essential | conserved protein with nucleoside triphosphate hydrolase domain                                            | 0.43  |
| b4109 | yjdA | Isolate 2 | non-essential | conserved protein with nucleoside triphosphate hydrolase domain                                            | -0.06 |
| b4110 | yjcZ | Isolate 1 | non-essential | conserved protein                                                                                          | 1.35  |
| b4110 | yjcZ | Isolate 2 | non-essential | conserved protein                                                                                          | 0.73  |

|       |      |           |               |                                                                                                                    |       |
|-------|------|-----------|---------------|--------------------------------------------------------------------------------------------------------------------|-------|
| b4111 | proP | Isolate 1 | non-essential | proline/glycine betaine transporter                                                                                | 2.52  |
| b4111 | proP | Isolate 2 | non-essential | proline/glycine betaine transporter                                                                                | 0.86  |
| b4112 | basS | Isolate 1 | non-essential | sensory histidine kinase in two-component regulatory system with BasR                                              | 0.23  |
| b4112 | basS | Isolate 2 | non-essential | sensory histidine kinase in two-component regulatory system with BasR                                              | -0.47 |
| b4113 | basR | Isolate 1 | non-essential | DNA-binding response regulator in two-component regulatory system with BasS                                        | -1.30 |
| b4113 | basR | Isolate 2 | non-essential | DNA-binding response regulator in two-component regulatory system with BasS                                        | -3.20 |
| b4114 | eptA | Isolate 1 | non-essential | predicted metal dependent hydrolase                                                                                | -0.68 |
| b4114 | eptA | Isolate 2 | non-essential | predicted metal dependent hydrolase                                                                                | 0.64  |
| b4115 | adiC | Isolate 1 | non-essential | arginine:agmatin                                                                                                   | -0.73 |
| b4115 | adiC | Isolate 2 | non-essential | arginine:agmatin                                                                                                   | -1.30 |
| b4116 | adiY | Isolate 1 | non-essential | DNA-binding transcriptional activator                                                                              | 0.29  |
| b4116 | adiY | Isolate 2 | non-essential | DNA-binding transcriptional activator                                                                              | 1.70  |
| b4117 | adiA | Isolate 1 | non-essential | biodegradative arginine decarboxylase                                                                              | 1.76  |
| b4117 | adiA | Isolate 2 | non-essential | biodegradative arginine decarboxylase                                                                              | 0.49  |
| b4118 | melR | Isolate 1 | non-essential | DNA-binding transcriptional dual regulator                                                                         | 0.86  |
| b4118 | melR | Isolate 2 | non-essential | DNA-binding transcriptional dual regulator                                                                         | -1.44 |
| b4119 | melA | Isolate 1 | non-essential | alpha-galactosidase, NAD(P)-binding                                                                                | -1.35 |
| b4119 | melA | Isolate 2 | non-essential | alpha-galactosidase, NAD(P)-binding                                                                                | 0.99  |
| b4120 | melB | Isolate 1 | non-essential | melibiose:sodium symporter                                                                                         | -0.55 |
| b4120 | melB | Isolate 2 | non-essential | melibiose:sodium symporter                                                                                         | -1.20 |
| b4121 | yjdF | Isolate 1 | non-essential | conserved inner membrane protein                                                                                   | -1.49 |
| b4121 | yjdF | Isolate 2 | non-essential | conserved inner membrane protein                                                                                   | 0.79  |
| b4122 | fumB | Isolate 1 | non-essential | anaerobic class I fumarate hydratase (fumarase B)                                                                  | 1.82  |
| b4122 | fumB | Isolate 2 | non-essential | anaerobic class I fumarate hydratase (fumarase B)                                                                  | -0.81 |
| b4123 | dcuB | Isolate 1 | non-essential | C4-dicarboxylate antiporter                                                                                        | 2.91  |
| b4123 | dcuB | Isolate 2 | non-essential | C4-dicarboxylate antiporter                                                                                        | 3.79  |
| b4124 | dcuR | Isolate 1 | non-essential | DNA-binding response regulator in two-component regulatory system with DcuS                                        | -2.27 |
| b4124 | dcuR | Isolate 2 | non-essential | DNA-binding response regulator in two-component regulatory system with DcuS                                        | -0.51 |
| b4125 | dcuS | Isolate 1 | non-essential | sensory histidine kinase in two-component regulatory system with DcuR, regulator of anaerobic fumarate respiration | 0.51  |
| b4125 | dcuS | Isolate 2 | non-essential | sensory histidine kinase in two-component regulatory system with DcuR, regulator of anaerobic fumarate respiration | -0.77 |
| b4126 | yjdI | Isolate 1 | non-essential | conserved protein                                                                                                  | 0.21  |
| b4126 | yjdI | Isolate 2 | non-essential | conserved protein                                                                                                  | 1.37  |
| b4127 | yjdJ | Isolate 1 | non-essential | predicted acyltransferase with acyl-CoA N-acyltransferase domain                                                   | -0.33 |
| b4127 | yjdJ | Isolate 2 | non-essential | predicted acyltransferase with acyl-CoA N-acyltransferase domain                                                   | 0.03  |
| b4128 | yjdK | Isolate 1 | non-essential | predicted protein                                                                                                  | -1.85 |
| b4128 | yjdK | Isolate 2 | non-essential | predicted protein                                                                                                  | -1.65 |
| b4129 | lysU | Isolate 1 | non-essential | lysine tRNA synthetase, inducible                                                                                  | -1.58 |
| b4129 | lysU | Isolate 2 | non-essential | lysine tRNA synthetase, inducible                                                                                  | 0.37  |
| b4130 | yjdL | Isolate 1 | non-essential | predicted transporter                                                                                              | 0.48  |
| b4130 | yjdL | Isolate 2 | non-essential | predicted transporter                                                                                              | 0.00  |
| b4131 | cadA | Isolate 1 | non-essential | lysine decarboxylase 1                                                                                             | 0.74  |
| b4131 | cadA | Isolate 2 | non-essential | lysine decarboxylase 1                                                                                             | -2.01 |
| b4132 | cadB | Isolate 1 | non-essential | predicted lysine/cadaverine transporter                                                                            | -0.30 |

|       |      |           |               |                                                                       |       |
|-------|------|-----------|---------------|-----------------------------------------------------------------------|-------|
| b4132 | cadB | Isolate 2 | non-essential | predicted lysine/cadaverine transporter                               | 1.86  |
| b4133 | cadC | Isolate 1 | non-essential | DNA-binding transcriptional activator                                 | 0.99  |
| b4133 | cadC | Isolate 2 | non-essential | DNA-binding transcriptional activator                                 | 0.73  |
| b4135 | yjdC | Isolate 1 | non-essential | predicted transcriptional regulator                                   | 0.00  |
| b4135 | yjdC | Isolate 2 | non-essential | predicted transcriptional regulator                                   | -0.48 |
| b4136 | dipZ | Isolate 1 | non-essential | fused thiol:disulfide interchange protein                             | 0.57  |
| b4136 | dipZ | Isolate 2 | non-essential | fused thiol:disulfide interchange protein                             | -0.28 |
| b4137 | cutA | Isolate 1 | non-essential | copper binding protein, copper sensitivity                            | -2.29 |
| b4137 | cutA | Isolate 2 | non-essential | copper binding protein, copper sensitivity                            | -2.28 |
| b4138 | dcuA | Isolate 1 | non-essential | C4-dicarboxylate antiporter                                           | 0.72  |
| b4138 | dcuA | Isolate 2 | non-essential | C4-dicarboxylate antiporter                                           | 1.39  |
| b4139 | aspA | Isolate 1 | non-essential | aspartate ammonia-lyase                                               | 1.47  |
| b4139 | aspA | Isolate 2 | non-essential | aspartate ammonia-lyase                                               | 2.08  |
| b4140 | fxsA | Isolate 1 | non-essential | inner membrane protein                                                | 0.35  |
| b4140 | fxsA | Isolate 2 | non-essential | inner membrane protein                                                | -1.69 |
| b4141 | yjeH | Isolate 1 | non-essential | predicted transporter                                                 | 1.02  |
| b4141 | yjeH | Isolate 2 | non-essential | predicted transporter                                                 | -0.91 |
| b4142 | groS | Isolate 1 | essential     | Cpn10 chaperonin GroES, small subunit of GroESL                       | 0.25  |
| b4143 | groL | Isolate 1 | non-essential | Cpn60 chaperonin GroEL, large subunit of GroESL                       | -1.75 |
| b4143 | groL | Isolate 2 | non-essential | Cpn60 chaperonin GroEL, large subunit of GroESL                       | -1.81 |
| b4144 | yjeI | Isolate 1 | non-essential | conserved protein                                                     | -0.65 |
| b4144 | yjeI | Isolate 2 | non-essential | conserved protein                                                     | 1.84  |
| b4145 | yjeJ | Isolate 1 | non-essential | predicted protein                                                     | -2.29 |
| b4145 | yjeJ | Isolate 2 | non-essential | predicted protein                                                     | -0.75 |
| b4146 | yjeK | Isolate 1 | non-essential | predicted lysine aminomutase                                          | -1.74 |
| b4146 | yjeK | Isolate 2 | non-essential | predicted lysine aminomutase                                          | 0.03  |
| b4147 | efp  | Isolate 1 | non-essential | Elongation factor EF-P                                                | 1.92  |
| b4147 | efp  | Isolate 2 | non-essential | Elongation factor EF-P                                                | -0.23 |
| b4148 | sugE | Isolate 1 | non-essential | multidrug efflux system protein                                       | 0.74  |
| b4148 | sugE | Isolate 2 | non-essential | multidrug efflux system protein                                       | 0.95  |
| b4149 | blc  | Isolate 1 | non-essential | outer membrane lipoprotein (lipocalin)                                | -1.58 |
| b4149 | blc  | Isolate 2 | non-essential | outer membrane lipoprotein (lipocalin)                                | -0.76 |
| b4150 | ampC | Isolate 1 | non-essential | beta-lactamase/D-alanine carboxypeptidase                             | -0.07 |
| b4150 | ampC | Isolate 2 | non-essential | beta-lactamase/D-alanine carboxypeptidase                             | 2.11  |
| b4151 | frdD | Isolate 1 | non-essential | fumarate reductase (anaerobic), membrane anchor subunit               | -0.17 |
| b4151 | frdD | Isolate 2 | non-essential | fumarate reductase (anaerobic), membrane anchor subunit               | 0.49  |
| b4152 | frdC | Isolate 1 | non-essential | fumarate reductase (anaerobic), membrane anchor subunit               | -2.59 |
| b4152 | frdC | Isolate 2 | non-essential | fumarate reductase (anaerobic), membrane anchor subunit               | -0.68 |
| b4153 | frdB | Isolate 1 | non-essential | fumarate reductase (anaerobic), Fe-S subunit                          | 0.01  |
| b4153 | frdB | Isolate 2 | non-essential | fumarate reductase (anaerobic), Fe-S subunit                          | -1.07 |
| b4154 | frdA | Isolate 1 | non-essential | fumarate reductase (anaerobic) catalytic and NAD/flavoprotein subunit | -0.78 |
| b4154 | frdA | Isolate 2 | non-essential | fumarate reductase (anaerobic) catalytic and NAD/flavoprotein subunit | -0.61 |
| b4155 | poxA | Isolate 1 | non-essential | predicted lysyl-tRNA synthetase                                       | -1.01 |

|       |      |           |               |                                                                     |       |
|-------|------|-----------|---------------|---------------------------------------------------------------------|-------|
| b4155 | poxA | Isolate 2 | non-essential | predicted lysyl-tRNA synthetase                                     | -0.66 |
| b4156 | yjeM | Isolate 1 | non-essential | predicted transporter                                               | 1.03  |
| b4156 | yjeM | Isolate 2 | non-essential | predicted transporter                                               | 0.74  |
| b4157 | yjeN | Isolate 1 | non-essential | predicted protein                                                   | 0.58  |
| b4157 | yjeN | Isolate 2 | non-essential | predicted protein                                                   | -1.43 |
| b4158 | yjeO | Isolate 1 | non-essential | conserved inner membrane protein                                    | -1.86 |
| b4158 | yjeO | Isolate 2 | non-essential | conserved inner membrane protein                                    | 0.78  |
| b4159 | yjeP | Isolate 1 | non-essential | predicted mechanosensitive channel                                  | -2.73 |
| b4159 | yjeP | Isolate 2 | non-essential | predicted mechanosensitive channel                                  | -0.88 |
| b4161 | rsgA | Isolate 1 | non-essential | ribosome small subunit-dependent GTPase A                           | 1.08  |
| b4161 | rsgA | Isolate 2 | non-essential | ribosome small subunit-dependent GTPase A                           | 1.04  |
| b4166 | yjeS | Isolate 1 | non-essential | predicted Fe-S electron transport protein                           | 0.57  |
| b4166 | yjeS | Isolate 2 | non-essential | predicted Fe-S electron transport protein                           | 1.17  |
| b4168 | yjeE | Isolate 1 | essential     | ATPase with strong ADP affinity                                     | -2.10 |
| b4169 | amiB | Isolate 1 | non-essential | N-acetylmuramoyl-l-alanine amidase II                               | 1.03  |
| b4169 | amiB | Isolate 2 | non-essential | N-acetylmuramoyl-l-alanine amidase II                               | 0.44  |
| b4170 | mutL | Isolate 1 | non-essential | methyl-directed mismatch repair protein                             | -0.60 |
| b4170 | mutL | Isolate 2 | non-essential | methyl-directed mismatch repair protein                             | -0.63 |
| b4171 | miaA | Isolate 1 | non-essential | delta(2)-isopentenylpyrophosphate tRNA-adenosine transferase        | 1.27  |
| b4171 | miaA | Isolate 2 | non-essential | delta(2)-isopentenylpyrophosphate tRNA-adenosine transferase        | 1.45  |
| b4172 | hfq  | Isolate 1 | non-essential | HF-I, host factor for RNA phage Q beta replication                  | 0.56  |
| b4172 | hfq  | Isolate 2 | non-essential | HF-I, host factor for RNA phage Q beta replication                  | 0.50  |
| b4173 | hflX | Isolate 1 | non-essential | predicted GTPase                                                    | -0.87 |
| b4173 | hflX | Isolate 2 | non-essential | predicted GTPase                                                    | -0.50 |
| b4174 | hflK | Isolate 1 | non-essential | modulator for HflB protease specific for phage lambda cII repressor | -0.13 |
| b4174 | hflK | Isolate 2 | non-essential | modulator for HflB protease specific for phage lambda cII repressor | -1.55 |
| b4175 | hflC | Isolate 1 | non-essential | modulator for HflB protease specific for phage lambda cII repressor | -0.58 |
| b4175 | hflC | Isolate 2 | non-essential | modulator for HflB protease specific for phage lambda cII repressor | -1.64 |
| b4176 | yjeT | Isolate 1 | non-essential | conserved inner membrane protein                                    | 0.43  |
| b4176 | yjeT | Isolate 2 | non-essential | conserved inner membrane protein                                    | -1.39 |
| b4177 | purA | Isolate 1 | non-essential | adenylosuccinate synthetase                                         | -1.43 |
| b4177 | purA | Isolate 2 | non-essential | adenylosuccinate synthetase                                         | -2.13 |
| b4178 | yjeB | Isolate 1 | non-essential | predicted DNA-binding transcriptional regulator                     | -0.39 |
| b4178 | yjeB | Isolate 2 | non-essential | predicted DNA-binding transcriptional regulator                     | -0.74 |
| b4179 | rnr  | Isolate 1 | non-essential | exoribonuclease R, RNase R                                          | -0.03 |
| b4179 | rnr  | Isolate 2 | non-essential | exoribonuclease R, RNase R                                          | -1.01 |
| b4180 | rlmB | Isolate 1 | non-essential | 23S rRNA (Gm2251)-methyltransferase                                 | -0.25 |
| b4180 | rlmB | Isolate 2 | non-essential | 23S rRNA (Gm2251)-methyltransferase                                 | -0.42 |
| b4181 | yjfl | Isolate 1 | non-essential | conserved protein                                                   | -0.16 |
| b4181 | yjfl | Isolate 2 | non-essential | conserved protein                                                   | -0.87 |
| b4182 | yjfJ | Isolate 1 | non-essential | predicted transcriptional regulator effector protein                | -1.17 |
| b4182 | yjfJ | Isolate 2 | non-essential | predicted transcriptional regulator effector protein                | -0.77 |
| b4183 | yjfK | Isolate 1 | non-essential | conserved protein                                                   | -1.19 |

|       |      |           |               |                                                  |       |
|-------|------|-----------|---------------|--------------------------------------------------|-------|
| b4183 | yjfK | Isolate 2 | non-essential | conserved protein                                | 0.00  |
| b4184 | yjfL | Isolate 1 | non-essential | conserved inner membrane protein                 | -1.52 |
| b4184 | yjfL | Isolate 2 | non-essential | conserved inner membrane protein                 | -0.80 |
| b4185 | yjfM | Isolate 1 | non-essential | conserved protein                                | 0.20  |
| b4185 | yjfM | Isolate 2 | non-essential | conserved protein                                | 0.02  |
| b4186 | yjfC | Isolate 1 | non-essential | predicted synthetase/amidase                     | -0.37 |
| b4186 | yjfC | Isolate 2 | non-essential | predicted synthetase/amidase                     | 0.03  |
| b4187 | aidB | Isolate 1 | non-essential | isovaleryl CoA dehydrogenase                     | -0.12 |
| b4187 | aidB | Isolate 2 | non-essential | isovaleryl CoA dehydrogenase                     | 0.44  |
| b4188 | yjfN | Isolate 1 | non-essential | predicted protein                                | -1.46 |
| b4188 | yjfN | Isolate 2 | non-essential | predicted protein                                | -1.55 |
| b4189 | yjfO | Isolate 1 | non-essential | conserved protein                                | 0.54  |
| b4189 | yjfO | Isolate 2 | non-essential | conserved protein                                | -1.08 |
| b4190 | yjfP | Isolate 1 | non-essential | predicted hydrolase                              | -1.52 |
| b4190 | yjfP | Isolate 2 | non-essential | predicted hydrolase                              | -0.53 |
| b4191 | ulaR | Isolate 1 | non-essential | DNA-binding transcriptional dual regulator       | 0.10  |
| b4191 | ulaR | Isolate 2 | non-essential | DNA-binding transcriptional dual regulator       | -0.60 |
| b4192 | ulaG | Isolate 1 | non-essential | L-ascorbate 6-phosphate lactonase                | 0.11  |
| b4192 | ulaG | Isolate 2 | non-essential | L-ascorbate 6-phosphate lactonase                | -1.88 |
| b4193 | ulaA | Isolate 1 | non-essential | L-ascorbate-specific enzyme IIC component of PTS | 0.43  |
| b4193 | ulaA | Isolate 2 | non-essential | L-ascorbate-specific enzyme IIC component of PTS | 0.51  |
| b4194 | ulaB | Isolate 1 | non-essential | L-ascorbate-specific enzyme IIB component of PTS | 0.04  |
| b4194 | ulaB | Isolate 2 | non-essential | L-ascorbate-specific enzyme IIB component of PTS | 1.65  |
| b4195 | ulaC | Isolate 1 | non-essential | L-ascorbate-specific enzyme IIA component of PTS | 1.39  |
| b4195 | ulaC | Isolate 2 | non-essential | L-ascorbate-specific enzyme IIA component of PTS | 2.19  |
| b4196 | ulaD | Isolate 1 | non-essential | 3-keto-L-gulonate 6-phosphate decarboxylase      | 1.16  |
| b4196 | ulaD | Isolate 2 | non-essential | 3-keto-L-gulonate 6-phosphate decarboxylase      | 0.34  |
| b4197 | ulaE | Isolate 1 | non-essential | L-xylulose 5-phosphate 3-epimerase               | -0.44 |
| b4197 | ulaE | Isolate 2 | non-essential | L-xylulose 5-phosphate 3-epimerase               | -0.54 |
| b4198 | ulaF | Isolate 1 | non-essential | L-ribulose 5-phosphate 4-epimerase               | -0.03 |
| b4198 | ulaF | Isolate 2 | non-essential | L-ribulose 5-phosphate 4-epimerase               | -0.19 |
| b4199 | yjfY | Isolate 1 | non-essential | predicted protein                                | 0.60  |
| b4199 | yjfY | Isolate 2 | non-essential | predicted protein                                | 1.42  |
| b4200 | rpsF | Isolate 1 | non-essential | 30S ribosomal subunit protein S6                 | 2.27  |
| b4200 | rpsF | Isolate 2 | non-essential | 30S ribosomal subunit protein S6                 | -0.31 |
| b4201 | priB | Isolate 1 | non-essential | primosomal protein N                             | -1.81 |
| b4201 | priB | Isolate 2 | non-essential | primosomal protein N                             | -1.25 |
| b4203 | rplI | Isolate 1 | non-essential | 50S ribosomal subunit protein L9                 | 1.72  |
| b4203 | rplI | Isolate 2 | non-essential | 50S ribosomal subunit protein L9                 | 1.76  |
| b4204 | yjfZ | Isolate 1 | non-essential | predicted protein                                | -1.83 |
| b4204 | yjfZ | Isolate 2 | non-essential | predicted protein                                | -1.17 |
| b4205 | ytfA | Isolate 1 | non-essential | predicted transcriptional regulator              | 0.42  |
| b4205 | ytfA | Isolate 2 | non-essential | predicted transcriptional regulator              | 0.94  |

|       |      |           |               |                                                                                          |       |
|-------|------|-----------|---------------|------------------------------------------------------------------------------------------|-------|
| b4206 | ytfB | Isolate 1 | non-essential | predicted cell envelope opacity-associated protein                                       | 1.42  |
| b4206 | ytfB | Isolate 2 | non-essential | predicted cell envelope opacity-associated protein                                       | -1.27 |
| b4207 | fkIB | Isolate 1 | non-essential | FKBP-type peptidyl-prolyl cis-trans isomerase (rotamase)                                 | 0.03  |
| b4207 | fkIB | Isolate 2 | non-essential | FKBP-type peptidyl-prolyl cis-trans isomerase (rotamase)                                 | -0.58 |
| b4208 | cycA | Isolate 1 | non-essential | D-alanine/D-serine/glycine transporter                                                   | 0.36  |
| b4208 | cycA | Isolate 2 | non-essential | D-alanine/D-serine/glycine transporter                                                   | -0.58 |
| b4209 | ytfE | Isolate 1 | non-essential | predicted regulator of cell morphogenesis and cell wall metabolism                       | -2.01 |
| b4209 | ytfE | Isolate 2 | non-essential | predicted regulator of cell morphogenesis and cell wall metabolism                       | -0.34 |
| b4210 | ytfF | Isolate 1 | non-essential | predicted inner membrane protein                                                         | 0.34  |
| b4210 | ytfF | Isolate 2 | non-essential | predicted inner membrane protein                                                         | -0.44 |
| b4211 | ytfG | Isolate 1 | non-essential | NAD(P)H:quinone oxidoreductase                                                           | -0.82 |
| b4211 | ytfG | Isolate 2 | non-essential | NAD(P)H:quinone oxidoreductase                                                           | 1.65  |
| b4212 | ytfH | Isolate 1 | non-essential | predicted transcriptional regulator                                                      | 1.62  |
| b4212 | ytfH | Isolate 2 | non-essential | predicted transcriptional regulator                                                      | 0.10  |
| b4213 | cpdB | Isolate 1 | non-essential | 2':3'-cyclic-nucleotide 2'-phosphodiesterase                                             | 0.83  |
| b4213 | cpdB | Isolate 2 | non-essential | 2':3'-cyclic-nucleotide 2'-phosphodiesterase                                             | -0.23 |
| b4214 | cysQ | Isolate 1 | non-essential | PAPS (adenosine 3'-phosphate 5'-phosphosulfate) 3'(2'),5'-bisphosphate nucleotidase      | -1.81 |
| b4214 | cysQ | Isolate 2 | non-essential | PAPS (adenosine 3'-phosphate 5'-phosphosulfate) 3'(2'),5'-bisphosphate nucleotidase      | -0.71 |
| b4215 | ytfI | Isolate 1 | non-essential | predicted protein                                                                        | -0.09 |
| b4215 | ytfI | Isolate 2 | non-essential | predicted protein                                                                        | -1.00 |
| b4216 | ytfJ | Isolate 1 | non-essential | predicted transcriptional regulator                                                      | -0.13 |
| b4216 | ytfJ | Isolate 2 | non-essential | predicted transcriptional regulator                                                      | -1.73 |
| b4217 | ytfK | Isolate 1 | non-essential | conserved protein                                                                        | -0.29 |
| b4217 | ytfK | Isolate 2 | non-essential | conserved protein                                                                        | -1.50 |
| b4218 | ytfL | Isolate 1 | non-essential | predicted inner membrane protein                                                         | 0.44  |
| b4218 | ytfL | Isolate 2 | non-essential | predicted inner membrane protein                                                         | -1.00 |
| b4219 | msrA | Isolate 1 | non-essential | methionine sulfoxide reductase A                                                         | 1.00  |
| b4219 | msrA | Isolate 2 | non-essential | methionine sulfoxide reductase A                                                         | -0.46 |
| b4220 | ytfM | Isolate 1 | non-essential | predicted outer membrane protein and surface antigen                                     | 0.36  |
| b4220 | ytfM | Isolate 2 | non-essential | predicted outer membrane protein and surface antigen                                     | 0.66  |
| b4221 | ytfN | Isolate 1 | non-essential | conserved protein                                                                        | -1.39 |
| b4221 | ytfN | Isolate 2 | non-essential | conserved protein                                                                        | -1.72 |
| b4222 | ytfP | Isolate 1 | non-essential | conserved protein                                                                        | -2.83 |
| b4222 | ytfP | Isolate 2 | non-essential | conserved protein                                                                        | -1.90 |
| b4223 | yzfA | Isolate 1 | non-essential | predicted protein                                                                        | -0.58 |
| b4223 | yzfA | Isolate 2 | non-essential | predicted protein                                                                        | 0.16  |
| b4225 | chpB | Isolate 1 | non-essential | toxin of the ChpB-ChpS toxin-antitoxin system                                            | -1.23 |
| b4225 | chpB | Isolate 2 | non-essential | toxin of the ChpB-ChpS toxin-antitoxin system                                            | 0.79  |
| b4226 | ppa  | Isolate 1 | essential     | inorganic pyrophosphatase                                                                | 3.95  |
| b4227 | ytfQ | Isolate 1 | non-essential | predicted sugar transporter subunit -!- periplasmic-binding component of ABC superfamily | 0.28  |
| b4227 | ytfQ | Isolate 2 | non-essential | predicted sugar transporter subunit -!- periplasmic-binding component of ABC superfamily | 0.24  |
| b4230 | ytfT | Isolate 1 | non-essential | predicted sugar transporter subunit -!- membrane component of ABC superfamily            | -1.84 |
| b4230 | ytfT | Isolate 2 | non-essential | predicted sugar transporter subunit -!- membrane component of ABC superfamily            | -0.06 |

|       |      |           |               |                                                                                                |       |
|-------|------|-----------|---------------|------------------------------------------------------------------------------------------------|-------|
| b4231 | yjfF | Isolate 1 | non-essential | predicted sugar transporter subunit -!- membrane component of ABC superfamily                  | 2.31  |
| b4231 | yjfF | Isolate 2 | non-essential | predicted sugar transporter subunit -!- membrane component of ABC superfamily                  | 1.98  |
| b4232 | fbp  | Isolate 1 | non-essential | fructose-1,6-bisphosphatase I                                                                  | -0.36 |
| b4232 | fbp  | Isolate 2 | non-essential | fructose-1,6-bisphosphatase I                                                                  | 0.77  |
| b4233 | mpl  | Isolate 1 | non-essential | UDP-N-acetylmuramate:L-alanyl-gamma-D-glutamyl-meso-diaminopimelate ligase                     | -0.42 |
| b4233 | mpl  | Isolate 2 | non-essential | UDP-N-acetylmuramate:L-alanyl-gamma-D-glutamyl-meso-diaminopimelate ligase                     | -0.09 |
| b4234 | yjgA | Isolate 1 | non-essential | conserved protein                                                                              | -1.32 |
| b4234 | yjgA | Isolate 2 | non-essential | conserved protein                                                                              | -0.24 |
| b4235 | pmbA | Isolate 1 | non-essential | predicted peptidase required for the maturation and secretion of the antibiotic peptide MccB17 | 2.42  |
| b4235 | pmbA | Isolate 2 | non-essential | predicted peptidase required for the maturation and secretion of the antibiotic peptide MccB17 | 2.79  |
| b4236 | cybC | Isolate 1 | *             | cytochrome b562, truncated (pseudogene)                                                        | -1.52 |
| b4236 | cybC | Isolate 2 | *             | cytochrome b562, truncated (pseudogene)                                                        | -1.44 |
| b4237 | nrdG | Isolate 1 | non-essential | anaerobic ribonucleotide reductase activating protein                                          | 0.42  |
| b4237 | nrdG | Isolate 2 | non-essential | anaerobic ribonucleotide reductase activating protein                                          | 1.46  |
| b4238 | nrdD | Isolate 1 | non-essential | anaerobic ribonucleoside-triphosphate reductase                                                | 0.14  |
| b4238 | nrdD | Isolate 2 | non-essential | anaerobic ribonucleoside-triphosphate reductase                                                | -0.40 |
| b4239 | treC | Isolate 1 | non-essential | trehalose-6-P hydrolase                                                                        | -0.89 |
| b4239 | treC | Isolate 2 | non-essential | trehalose-6-P hydrolase                                                                        | -0.02 |
| b4240 | treB | Isolate 1 | non-essential | fused trehalose(maltose)-specific enzyme IIBC component of PTS                                 | -0.19 |
| b4240 | treB | Isolate 2 | non-essential | fused trehalose(maltose)-specific enzyme IIBC component of PTS                                 | -0.08 |
| b4241 | treR | Isolate 1 | non-essential | DNA-binding transcriptional repressor                                                          | 0.42  |
| b4241 | treR | Isolate 2 | non-essential | DNA-binding transcriptional repressor                                                          | 0.49  |
| b4242 | mgtA | Isolate 1 | non-essential | magnesium transporter                                                                          | 0.09  |
| b4242 | mgtA | Isolate 2 | non-essential | magnesium transporter                                                                          | 0.28  |
| b4243 | yjgF | Isolate 1 | non-essential | ketoacid-binding protein                                                                       | -1.97 |
| b4243 | yjgF | Isolate 2 | non-essential | ketoacid-binding protein                                                                       | -0.56 |
| b4244 | pyrI | Isolate 1 | non-essential | aspartate carbamoyltransferase, regulatory subunit                                             | -2.07 |
| b4244 | pyrI | Isolate 2 | non-essential | aspartate carbamoyltransferase, regulatory subunit                                             | -2.57 |
| b4245 | pyrB | Isolate 1 | non-essential | aspartate carbamoyltransferase, catalytic subunit                                              | -0.97 |
| b4245 | pyrB | Isolate 2 | non-essential | aspartate carbamoyltransferase, catalytic subunit                                              | 0.94  |
| b4246 | pyrL | Isolate 1 | non-essential | pyrBI operon leader peptide                                                                    | -0.23 |
| b4246 | pyrL | Isolate 2 | non-essential | pyrBI operon leader peptide                                                                    | 0.16  |
| b4248 | yjgH | Isolate 1 | non-essential | predicted mRNA endoribonuclease                                                                | -1.08 |
| b4248 | yjgH | Isolate 2 | non-essential | predicted mRNA endoribonuclease                                                                | -0.91 |
| b4249 | yjgI | Isolate 1 | non-essential | predicted oxidoreductase with NAD(P)-binding Rossmann-fold domain                              | 0.56  |
| b4249 | yjgI | Isolate 2 | non-essential | predicted oxidoreductase with NAD(P)-binding Rossmann-fold domain                              | 2.21  |
| b4251 | yjgJ | Isolate 1 | non-essential | predicted transcriptional regulator                                                            | 1.14  |
| b4251 | yjgJ | Isolate 2 | non-essential | predicted transcriptional regulator                                                            | 0.69  |
| b4252 | yjgK | Isolate 1 | non-essential | conserved protein                                                                              | -0.76 |
| b4252 | yjgK | Isolate 2 | non-essential | conserved protein                                                                              | -0.64 |
| b4253 | yjgL | Isolate 1 | non-essential | predicted protein                                                                              | -0.12 |
| b4253 | yjgL | Isolate 2 | non-essential | predicted protein                                                                              | -0.27 |
| b4254 | argI | Isolate 1 | non-essential | ornithine carbamoyltransferase 1                                                               | 1.16  |

|       |      |           |               |                                                                           |       |
|-------|------|-----------|---------------|---------------------------------------------------------------------------|-------|
| b4254 | argI | Isolate 2 | non-essential | ornithine carbamoyltransferase 1                                          | 2.31  |
| b4255 | yjgD | Isolate 1 | non-essential | conserved protein                                                         | -0.01 |
| b4255 | yjgD | Isolate 2 | non-essential | conserved protein                                                         | -0.02 |
| b4256 | yjgM | Isolate 1 | non-essential | predicted acetyltransferase                                               | -1.44 |
| b4256 | yjgM | Isolate 2 | non-essential | predicted acetyltransferase                                               | -1.76 |
| b4257 | yjgN | Isolate 1 | non-essential | conserved inner membrane protein                                          | 0.18  |
| b4257 | yjgN | Isolate 2 | non-essential | conserved inner membrane protein                                          | -0.55 |
| b4258 | valS | Isolate 1 | essential     | valyl-tRNA synthetase                                                     | -0.16 |
| b4259 | holC | Isolate 1 | non-essential | DNA polymerase III, chi subunit                                           | 3.26  |
| b4259 | holC | Isolate 2 | non-essential | DNA polymerase III, chi subunit                                           | 0.45  |
| b4260 | pepA | Isolate 1 | non-essential | aminopeptidase A, a cyteinyglycinase                                      | -0.79 |
| b4260 | pepA | Isolate 2 | non-essential | aminopeptidase A, a cyteinyglycinase                                      | -1.42 |
| b4263 | yjgR | Isolate 1 | non-essential | predicted ATPase                                                          | -0.76 |
| b4263 | yjgR | Isolate 2 | non-essential | predicted ATPase                                                          | -0.10 |
| b4264 | idnR | Isolate 1 | non-essential | DNA-binding transcriptional repressor, 5-gluconate-binding                | 1.85  |
| b4264 | idnR | Isolate 2 | non-essential | DNA-binding transcriptional repressor, 5-gluconate-binding                | 0.74  |
| b4265 | idnT | Isolate 1 | non-essential | L-idonate and D-gluconate transporter                                     | 0.11  |
| b4265 | idnT | Isolate 2 | non-essential | L-idonate and D-gluconate transporter                                     | -2.98 |
| b4266 | idnO | Isolate 1 | non-essential | 5-keto-D-gluconate-5-reductase                                            | -0.37 |
| b4266 | idnO | Isolate 2 | non-essential | 5-keto-D-gluconate-5-reductase                                            | 0.39  |
| b4267 | idnD | Isolate 1 | non-essential | L-idonate 5-dehydrogenase, NAD-binding                                    | -1.37 |
| b4267 | idnD | Isolate 2 | non-essential | L-idonate 5-dehydrogenase, NAD-binding                                    | -0.47 |
| b4268 | idnK | Isolate 1 | non-essential | D-gluconate kinase, thermosensitive                                       | -1.45 |
| b4268 | idnK | Isolate 2 | non-essential | D-gluconate kinase, thermosensitive                                       | 1.72  |
| b4269 | yjgB | Isolate 1 | non-essential | predicted alcohol dehydrogenase, Zn-dependent and NAD(P)-binding          | -1.30 |
| b4269 | yjgB | Isolate 2 | non-essential | predicted alcohol dehydrogenase, Zn-dependent and NAD(P)-binding          | -1.04 |
| b4271 | intB | Isolate 1 | non-essential | KpLE2 phage-like element; predicted integrase                             | 1.80  |
| b4271 | intB | Isolate 2 | non-essential | KpLE2 phage-like element; predicted integrase                             | 0.09  |
| b4274 | yjgW | Isolate 1 | non-essential | KpLE2 phage-like element; predicted protein                               | 2.30  |
| b4274 | yjgW | Isolate 2 | non-essential | KpLE2 phage-like element; predicted protein                               | 1.32  |
| b4275 | yjgX | Isolate 1 | *             | KpLE2 phage-like element; predicted protein, middle fragment (pseudogene) | -0.91 |
| b4275 | yjgX | Isolate 2 | *             | KpLE2 phage-like element; predicted protein, middle fragment (pseudogene) | -0.20 |
| b4276 | yjgX | Isolate 1 | *             | KpLE2 phage-like element; predicted protein, N-ter fragment (pseudogene)  | -1.41 |
| b4276 | yjgX | Isolate 2 | *             | KpLE2 phage-like element; predicted protein, N-ter fragment (pseudogene)  | 6.68  |
| b4277 | yjgZ | Isolate 1 | non-essential | KpLE2 phage-like element; predicted protein                               | 0.16  |
| b4277 | yjgZ | Isolate 2 | non-essential | KpLE2 phage-like element; predicted protein                               | -1.66 |
| b4279 | yjhB | Isolate 1 | non-essential | KpLE2 phage-like element; predicted transporter                           | -3.73 |
| b4279 | yjhB | Isolate 2 | non-essential | KpLE2 phage-like element; predicted transporter                           | 2.10  |
| b4280 | yjhC | Isolate 1 | non-essential | KpLE2 phage-like element; predicted oxidoreductase                        | 0.91  |
| b4280 | yjhC | Isolate 2 | non-essential | KpLE2 phage-like element; predicted oxidoreductase                        | 0.53  |
| b4281 | yjhD | Isolate 1 | *             | KpLE2 phage-like element; predicted protein (pseudogene)                  | -0.91 |
| b4281 | yjhD | Isolate 2 | *             | KpLE2 phage-like element; predicted protein (pseudogene)                  | 1.48  |
| b4282 | yjhE | Isolate 1 | *             | KpLE2 phage-like element; predicted membrane protein (pseudogene)         | -1.16 |



|       |      |           |               |                                                                                                                   |       |
|-------|------|-----------|---------------|-------------------------------------------------------------------------------------------------------------------|-------|
| b4282 | yjhE | Isolate 2 | *             | KpLE2 phage-like element; predicted membrane protein (pseudogene)                                                 | -1.02 |
| b4286 | yjhV | Isolate 1 | non-essential | KpLE2 phage-like element; predicted protein                                                                       | 1.69  |
| b4286 | yjhV | Isolate 2 | non-essential | KpLE2 phage-like element; predicted protein                                                                       | 0.44  |
| b4287 | fecE | Isolate 1 | non-essential | KpLE2 phage-like element; iron-dicitrate transporter subunit -!- ATP-binding component of ABC superfamily         | 1.91  |
| b4287 | fecE | Isolate 2 | non-essential | KpLE2 phage-like element; iron-dicitrate transporter subunit -!- ATP-binding component of ABC superfamily         | 2.04  |
| b4288 | fecD | Isolate 1 | non-essential | KpLE2 phage-like element; iron-dicitrate transporter subunit -!- membrane component of ABC superfamily            | 1.16  |
| b4288 | fecD | Isolate 2 | non-essential | KpLE2 phage-like element; iron-dicitrate transporter subunit -!- membrane component of ABC superfamily            | 0.30  |
| b4289 | fecC | Isolate 1 | non-essential | KpLE2 phage-like element; iron-dicitrate transporter subunit -!- membrane component of ABC superfamily            | 0.51  |
| b4289 | fecC | Isolate 2 | non-essential | KpLE2 phage-like element; iron-dicitrate transporter subunit -!- membrane component of ABC superfamily            | 0.25  |
| b4290 | fecB | Isolate 1 | non-essential | KpLE2 phage-like element; iron-dicitrate transporter subunit -!- periplasmic-binding component of ABC superfamily | 1.59  |
| b4290 | fecB | Isolate 2 | non-essential | KpLE2 phage-like element; iron-dicitrate transporter subunit -!- periplasmic-binding component of ABC superfamily | 1.76  |
| b4291 | fecA | Isolate 1 | non-essential | KpLE2 phage-like element; ferric citrate outer membrane transporter                                               | 0.48  |
| b4291 | fecA | Isolate 2 | non-essential | KpLE2 phage-like element; ferric citrate outer membrane transporter                                               | 0.38  |
| b4292 | fecR | Isolate 1 | non-essential | KpLE2 phage-like element; transmembrane signal transducer for ferric citrate transport                            | -0.39 |
| b4292 | fecR | Isolate 2 | non-essential | KpLE2 phage-like element; transmembrane signal transducer for ferric citrate transport                            | 0.17  |
| b4293 | fecI | Isolate 1 | non-essential | KpLE2 phage-like element; RNA polymerase, sigma 19 factor                                                         | -1.14 |
| b4293 | fecI | Isolate 2 | non-essential | KpLE2 phage-like element; RNA polymerase, sigma 19 factor                                                         | -0.46 |
| b4295 | yjhU | Isolate 1 | non-essential | KpLE2 phage-like element; predicted DNA-binding transcriptional regulator                                         | 1.70  |
| b4295 | yjhU | Isolate 2 | non-essential | KpLE2 phage-like element; predicted DNA-binding transcriptional regulator                                         | 2.26  |
| b4296 | yjhF | Isolate 1 | non-essential | KpLE2 phage-like element; predicted transporter                                                                   | 0.35  |
| b4296 | yjhF | Isolate 2 | non-essential | KpLE2 phage-like element; predicted transporter                                                                   | -0.78 |
| b4297 | yjhG | Isolate 1 | non-essential | KpLE2 phage-like element; predicted dehydratase                                                                   | -0.22 |
| b4297 | yjhG | Isolate 2 | non-essential | KpLE2 phage-like element; predicted dehydratase                                                                   | -1.47 |
| b4298 | yjhH | Isolate 1 | non-essential | KpLE2 phage-like element; predicted lyase/synthase                                                                | -1.65 |
| b4298 | yjhH | Isolate 2 | non-essential | KpLE2 phage-like element; predicted lyase/synthase                                                                | -1.33 |
| b4299 | yjhI | Isolate 1 | non-essential | KpLE2 phage-like element; predicted DNA-binding transcriptional regulator                                         | -0.76 |
| b4299 | yjhI | Isolate 2 | non-essential | KpLE2 phage-like element; predicted DNA-binding transcriptional regulator                                         | -0.21 |
| b4300 | sgcR | Isolate 1 | non-essential | KpLE2 phage-like element; predicted DNA-binding transcriptional regulator                                         | 0.84  |
| b4300 | sgcR | Isolate 2 | non-essential | KpLE2 phage-like element; predicted DNA-binding transcriptional regulator                                         | 3.35  |
| b4301 | sgcE | Isolate 1 | non-essential | KpLE2 phage-like element; predicted epimerase                                                                     | 0.72  |
| b4301 | sgcE | Isolate 2 | non-essential | KpLE2 phage-like element; predicted epimerase                                                                     | -1.11 |
| b4302 | sgcA | Isolate 1 | non-essential | KpLE2 phage-like element; predicted phosphotransferase enzyme IIA component                                       | -1.28 |
| b4302 | sgcA | Isolate 2 | non-essential | KpLE2 phage-like element; predicted phosphotransferase enzyme IIA component                                       | 1.76  |
| b4303 | sgcQ | Isolate 1 | non-essential | KpLE2 phage-like element; predicted nucleoside triphosphatase                                                     | 0.86  |
| b4303 | sgcQ | Isolate 2 | non-essential | KpLE2 phage-like element; predicted nucleoside triphosphatase                                                     | -0.57 |
| b4304 | sgcC | Isolate 1 | non-essential | KpLE2 phage-like element; predicted phosphotransferase enzyme IIC component                                       | -0.89 |
| b4304 | sgcC | Isolate 2 | non-essential | KpLE2 phage-like element; predicted phosphotransferase enzyme IIC component                                       | -1.13 |
| b4305 | sgcX | Isolate 1 | non-essential | KpLE2 phage-like element; predicted endoglucanase with Zn-dependent exopeptidase domain                           | -0.21 |
| b4305 | sgcX | Isolate 2 | non-essential | KpLE2 phage-like element; predicted endoglucanase with Zn-dependent exopeptidase domain                           | -0.52 |
| b4306 | yjhP | Isolate 1 | non-essential | KpLE2 phage-like element; predicted methyltransferase                                                             | -0.42 |
| b4306 | yjhP | Isolate 2 | non-essential | KpLE2 phage-like element; predicted methyltransferase                                                             | -0.22 |
| b4307 | yjhQ | Isolate 1 | non-essential | KpLE2 phage-like element; predicted acetyltransferase                                                             | 0.11  |
| b4307 | yjhQ | Isolate 2 | non-essential | KpLE2 phage-like element; predicted acetyltransferase                                                             | -0.27 |

|       |      |           |               |                                                            |       |
|-------|------|-----------|---------------|------------------------------------------------------------|-------|
| b4308 | yjhR | Isolate 1 | non-essential | KpLE2 phage-like element; predicted frameshift suppressor  | -0.09 |
| b4308 | yjhR | Isolate 2 | non-essential | KpLE2 phage-like element; predicted frameshift suppressor  | 0.24  |
| b4309 | yjhS | Isolate 1 | non-essential | conserved protein                                          | 1.82  |
| b4309 | yjhS | Isolate 2 | non-essential | conserved protein                                          | -0.37 |
| b4310 | yjhT | Isolate 1 | non-essential | conserved protein                                          | -1.25 |
| b4310 | yjhT | Isolate 2 | non-essential | conserved protein                                          | -1.17 |
| b4311 | yjhA | Isolate 1 | non-essential | N-acetylnuraminic acid outer membrane channel protein      | -0.71 |
| b4311 | yjhA | Isolate 2 | non-essential | N-acetylnuraminic acid outer membrane channel protein      | -0.19 |
| b4312 | fimB | Isolate 1 | non-essential | tyrosine recombinase/inversion of on/off regulator of fimA | -0.21 |
| b4312 | fimB | Isolate 2 | non-essential | tyrosine recombinase/inversion of on/off regulator of fimA | -0.43 |
| b4313 | fimE | Isolate 1 | non-essential | tyrosine recombinase/inversion of on/off regulator of fimA | 0.28  |
| b4313 | fimE | Isolate 2 | non-essential | tyrosine recombinase/inversion of on/off regulator of fimA | -0.35 |
| b4314 | fimA | Isolate 1 | non-essential | major type 1 subunit fimbrin (pilin)                       | 0.64  |
| b4314 | fimA | Isolate 2 | non-essential | major type 1 subunit fimbrin (pilin)                       | 1.27  |
| b4315 | fimI | Isolate 1 | non-essential | fimbrial protein involved in type 1 pilus biosynthesis     | -1.56 |
| b4315 | fimI | Isolate 2 | non-essential | fimbrial protein involved in type 1 pilus biosynthesis     | -1.41 |
| b4316 | fimC | Isolate 1 | non-essential | chaperone, periplasmic                                     | 0.86  |
| b4316 | fimC | Isolate 2 | non-essential | chaperone, periplasmic                                     | -2.10 |
| b4317 | fimD | Isolate 1 | non-essential | outer membrane usher protein, type 1 fimbrial synthesis    | -2.38 |
| b4317 | fimD | Isolate 2 | non-essential | outer membrane usher protein, type 1 fimbrial synthesis    | -2.80 |
| b4318 | fimF | Isolate 1 | non-essential | minor component of type 1 fimbriae                         | 2.10  |
| b4318 | fimF | Isolate 2 | non-essential | minor component of type 1 fimbriae                         | 0.25  |
| b4319 | fimG | Isolate 1 | non-essential | minor component of type 1 fimbriae                         | -1.63 |
| b4319 | fimG | Isolate 2 | non-essential | minor component of type 1 fimbriae                         | 1.42  |
| b4320 | fimH | Isolate 1 | non-essential | minor component of type 1 fimbriae                         | -0.06 |
| b4320 | fimH | Isolate 2 | non-essential | minor component of type 1 fimbriae                         | 1.36  |
| b4321 | gntP | Isolate 1 | non-essential | fructuronate transporter                                   | -0.03 |
| b4321 | gntP | Isolate 2 | non-essential | fructuronate transporter                                   | 0.58  |
| b4322 | uxuA | Isolate 1 | non-essential | mannonate hydrolase                                        | 0.60  |
| b4322 | uxuA | Isolate 2 | non-essential | mannonate hydrolase                                        | 0.31  |
| b4323 | uxuB | Isolate 1 | non-essential | D-mannonate oxidoreductase, NAD-binding                    | -0.90 |
| b4323 | uxuB | Isolate 2 | non-essential | D-mannonate oxidoreductase, NAD-binding                    | 3.15  |
| b4324 | uxuR | Isolate 1 | non-essential | DNA-binding transcriptional repressor                      | -1.75 |
| b4324 | uxuR | Isolate 2 | non-essential | DNA-binding transcriptional repressor                      | 0.19  |
| b4325 | yjiC | Isolate 1 | non-essential | predicted protein                                          | 0.60  |
| b4325 | yjiC | Isolate 2 | non-essential | predicted protein                                          | -0.50 |
| b4326 | yjiD | Isolate 1 | non-essential | DNA replication/recombination/repair protein               | 0.35  |
| b4326 | yjiD | Isolate 2 | non-essential | DNA replication/recombination/repair protein               | 0.18  |
| b4327 | yjiE | Isolate 1 | non-essential | predicted DNA-binding transcriptional regulator            | -1.43 |
| b4327 | yjiE | Isolate 2 | non-essential | predicted DNA-binding transcriptional regulator            | -1.60 |
| b4328 | iadA | Isolate 1 | non-essential | isoaspartyl dipeptidase                                    | 1.13  |
| b4328 | iadA | Isolate 2 | non-essential | isoaspartyl dipeptidase                                    | -0.54 |
| b4329 | yjiG | Isolate 1 | non-essential | conserved inner membrane protein                           | -0.46 |

|       |      |           |               |                                                                                      |       |
|-------|------|-----------|---------------|--------------------------------------------------------------------------------------|-------|
| b4329 | yjiG | Isolate 2 | non-essential | conserved inner membrane protein                                                     | 0.03  |
| b4330 | yjiH | Isolate 1 | non-essential | conserved inner membrane protein                                                     | -0.69 |
| b4330 | yjiH | Isolate 2 | non-essential | conserved inner membrane protein                                                     | -0.61 |
| b4331 | kptA | Isolate 1 | non-essential | 2'-phosphotransferase                                                                | -1.09 |
| b4331 | kptA | Isolate 2 | non-essential | 2'-phosphotransferase                                                                | -0.78 |
| b4332 | yjiJ | Isolate 1 | non-essential | predicted inner membrane protein                                                     | -0.50 |
| b4332 | yjiJ | Isolate 2 | non-essential | predicted inner membrane protein                                                     | -1.07 |
| b4333 | yjiK | Isolate 1 | non-essential | conserved protein                                                                    | -0.12 |
| b4333 | yjiK | Isolate 2 | non-essential | conserved protein                                                                    | -0.08 |
| b4334 | yjiL | Isolate 1 | non-essential | predicted ATPase, activator of (R)-hydroxyglutaryl-CoA dehydratase                   | 0.40  |
| b4334 | yjiL | Isolate 2 | non-essential | predicted ATPase, activator of (R)-hydroxyglutaryl-CoA dehydratase                   | 0.54  |
| b4335 | yjiM | Isolate 1 | non-essential | predicted 2-hydroxyglutaryl-CoA dehydratase                                          | 0.41  |
| b4335 | yjiM | Isolate 2 | non-essential | predicted 2-hydroxyglutaryl-CoA dehydratase                                          | -1.03 |
| b4336 | yjiN | Isolate 1 | non-essential | conserved inner membrane protein                                                     | 0.45  |
| b4336 | yjiN | Isolate 2 | non-essential | conserved inner membrane protein                                                     | 0.03  |
| b4337 | yjiO | Isolate 1 | non-essential | multidrug efflux system protein                                                      | -0.38 |
| b4337 | yjiO | Isolate 2 | non-essential | multidrug efflux system protein                                                      | 1.05  |
| b4338 | yjiP | Isolate 1 | *             | predicted transposase (pseudogene)                                                   | -2.04 |
| b4338 | yjiP | Isolate 2 | *             | predicted transposase (pseudogene)                                                   | -0.35 |
| b4340 | yjiR | Isolate 1 | non-essential | fused predicted DNA-binding transcriptional regulator -!- predicted aminotransferase | -0.18 |
| b4340 | yjiR | Isolate 2 | non-essential | fused predicted DNA-binding transcriptional regulator -!- predicted aminotransferase | 0.00  |
| b4341 | yjiS | Isolate 1 | non-essential | conserved protein                                                                    | -0.63 |
| b4341 | yjiS | Isolate 2 | non-essential | conserved protein                                                                    | 0.78  |
| b4342 | yjiT | Isolate 1 | non-essential | conserved protein                                                                    | 0.56  |
| b4342 | yjiT | Isolate 2 | non-essential | conserved protein                                                                    | -0.38 |
| b4344 | *    | Isolate 1 | *             | *                                                                                    | -1.67 |
| b4344 | *    | Isolate 2 | *             | *                                                                                    | 0.03  |
| b4345 | mcrC | Isolate 1 | non-essential | 5-methylcytosine-specific restriction enzyme McrBC, subunit McrC                     | 0.44  |
| b4345 | mcrC | Isolate 2 | non-essential | 5-methylcytosine-specific restriction enzyme McrBC, subunit McrC                     | -1.10 |
| b4346 | mcrB | Isolate 1 | non-essential | 5-methylcytosine-specific restriction enzyme McrBC, subunit McrB                     | -0.43 |
| b4346 | mcrB | Isolate 2 | non-essential | 5-methylcytosine-specific restriction enzyme McrBC, subunit McrB                     | -0.86 |
| b4347 | yjiW | Isolate 1 | non-essential | conserved protein                                                                    | -0.28 |
| b4347 | yjiW | Isolate 2 | non-essential | conserved protein                                                                    | -0.83 |
| b4348 | hsdS | Isolate 1 | non-essential | specificity determinant for hsdM and hsdR                                            | 0.78  |
| b4348 | hsdS | Isolate 2 | non-essential | specificity determinant for hsdM and hsdR                                            | -2.24 |
| b4349 | hsdM | Isolate 1 | non-essential | DNA methylase M                                                                      | 0.26  |
| b4349 | hsdM | Isolate 2 | non-essential | DNA methylase M                                                                      | 0.95  |
| b4350 | hsdR | Isolate 1 | non-essential | endonuclease R                                                                       | 0.04  |
| b4350 | hsdR | Isolate 2 | non-essential | endonuclease R                                                                       | -0.13 |
| b4351 | mrr  | Isolate 1 | non-essential | methylated adenine and cytosine restriction protein                                  | -1.92 |
| b4351 | mrr  | Isolate 2 | non-essential | methylated adenine and cytosine restriction protein                                  | 0.11  |
| b4352 | yjiA | Isolate 1 | non-essential | predicted GTPase                                                                     | 0.62  |
| b4352 | yjiA | Isolate 2 | non-essential | predicted GTPase                                                                     | 0.34  |

|       |      |           |               |                                                                |       |
|-------|------|-----------|---------------|----------------------------------------------------------------|-------|
| b4353 | yjiX | Isolate 1 | non-essential | conserved protein                                              | 2.76  |
| b4353 | yjiX | Isolate 2 | non-essential | conserved protein                                              | 0.70  |
| b4354 | yjiY | Isolate 1 | non-essential | predicted inner membrane protein                               | 1.27  |
| b4354 | yjiY | Isolate 2 | non-essential | predicted inner membrane protein                               | -0.53 |
| b4355 | tsr  | Isolate 1 | non-essential | methyl-accepting chemotaxis protein I, serine sensor receptor  | -0.69 |
| b4355 | tsr  | Isolate 2 | non-essential | methyl-accepting chemotaxis protein I, serine sensor receptor  | -3.75 |
| b4356 | yjiZ | Isolate 1 | non-essential | predicted transporter                                          | 0.05  |
| b4356 | yjiZ | Isolate 2 | non-essential | predicted transporter                                          | -1.47 |
| b4357 | yjjM | Isolate 1 | non-essential | predicted DNA-binding transcriptional regulator                | -0.67 |
| b4357 | yjjM | Isolate 2 | non-essential | predicted DNA-binding transcriptional regulator                | -0.23 |
| b4358 | yjjN | Isolate 1 | non-essential | predicted oxidoreductase, Zn-dependent and NAD(P)-binding      | 0.77  |
| b4358 | yjjN | Isolate 2 | non-essential | predicted oxidoreductase, Zn-dependent and NAD(P)-binding      | 1.45  |
| b4359 | mdoB | Isolate 1 | non-essential | phosphoglycerol transferase I                                  | 0.74  |
| b4359 | mdoB | Isolate 2 | non-essential | phosphoglycerol transferase I                                  | 2.21  |
| b4360 | yjjA | Isolate 1 | non-essential | conserved protein                                              | -0.05 |
| b4360 | yjjA | Isolate 2 | non-essential | conserved protein                                              | 1.04  |
| b4362 | dnaT | Isolate 1 | non-essential | DNA biosynthesis protein (primosomal protein I)                | 1.04  |
| b4362 | dnaT | Isolate 2 | non-essential | DNA biosynthesis protein (primosomal protein I)                | 0.01  |
| b4363 | yjjB | Isolate 1 | non-essential | conserved inner membrane protein                               | -1.16 |
| b4363 | yjjB | Isolate 2 | non-essential | conserved inner membrane protein                               | -1.45 |
| b4364 | yjjP | Isolate 1 | non-essential | predicted inner membrane protein                               | -1.05 |
| b4364 | yjjP | Isolate 2 | non-essential | predicted inner membrane protein                               | 0.80  |
| b4365 | yjjQ | Isolate 1 | non-essential | predicted DNA-binding transcriptional regulator                | -0.33 |
| b4365 | yjjQ | Isolate 2 | non-essential | predicted DNA-binding transcriptional regulator                | -0.11 |
| b4366 | bgIJ | Isolate 1 | non-essential | DNA-binding transcriptional regulator                          | 2.02  |
| b4366 | bgIJ | Isolate 2 | non-essential | DNA-binding transcriptional regulator                          | 0.22  |
| b4367 | fhuF | Isolate 1 | non-essential | ferric iron reductase involved in ferric hydroximate transport | 1.25  |
| b4367 | fhuF | Isolate 2 | non-essential | ferric iron reductase involved in ferric hydroximate transport | 3.27  |
| b4371 | rsmC | Isolate 1 | non-essential | 16S RNA m2G1207 methylase                                      | 0.88  |
| b4371 | rsmC | Isolate 2 | non-essential | 16S RNA m2G1207 methylase                                      | 2.89  |
| b4372 | holD | Isolate 1 | non-essential | DNA polymerase III, psi subunit                                | 0.08  |
| b4372 | holD | Isolate 2 | non-essential | DNA polymerase III, psi subunit                                | 2.30  |
| b4373 | rimI | Isolate 1 | non-essential | acetylase for 30S ribosomal subunit protein S18                | -0.52 |
| b4373 | rimI | Isolate 2 | non-essential | acetylase for 30S ribosomal subunit protein S18                | 0.66  |
| b4374 | yjjG | Isolate 1 | non-essential | predicted hydrolase                                            | -0.25 |
| b4374 | yjjG | Isolate 2 | non-essential | predicted hydrolase                                            | -0.07 |
| b4375 | prfC | Isolate 1 | non-essential | peptide chain release factor RF-3                              | 0.11  |
| b4375 | prfC | Isolate 2 | non-essential | peptide chain release factor RF-3                              | -0.39 |
| b4376 | osmY | Isolate 1 | non-essential | periplasmic protein                                            | 0.62  |
| b4376 | osmY | Isolate 2 | non-essential | periplasmic protein                                            | -0.30 |
| b4377 | yjjU | Isolate 1 | non-essential | predicted esterase                                             | 1.03  |
| b4377 | yjjU | Isolate 2 | non-essential | predicted esterase                                             | -0.13 |
| b4378 | yjjV | Isolate 1 | non-essential | predicted DNase                                                | 0.63  |

|       |      |           |               |                                                                                                               |       |
|-------|------|-----------|---------------|---------------------------------------------------------------------------------------------------------------|-------|
| b4378 | yjjV | Isolate 2 | non-essential | predicted DNase                                                                                               | 0.97  |
| b4379 | yjjW | Isolate 1 | non-essential | predicted pyruvate formate lyase activating enzyme                                                            | 0.55  |
| b4379 | yjjW | Isolate 2 | non-essential | predicted pyruvate formate lyase activating enzyme                                                            | 1.04  |
| b4380 | yjjI | Isolate 1 | non-essential | conserved protein                                                                                             | -0.36 |
| b4380 | yjjI | Isolate 2 | non-essential | conserved protein                                                                                             | -1.57 |
| b4381 | deoC | Isolate 1 | non-essential | 2-deoxyribose-5-phosphate aldolase, NAD(P)-linked                                                             | 0.68  |
| b4381 | deoC | Isolate 2 | non-essential | 2-deoxyribose-5-phosphate aldolase, NAD(P)-linked                                                             | 1.89  |
| b4382 | deoA | Isolate 1 | non-essential | thymidine phosphorylase                                                                                       | 0.39  |
| b4382 | deoA | Isolate 2 | non-essential | thymidine phosphorylase                                                                                       | -1.01 |
| b4383 | deoB | Isolate 1 | non-essential | phosphopentomutase                                                                                            | 0.10  |
| b4383 | deoB | Isolate 2 | non-essential | phosphopentomutase                                                                                            | 0.56  |
| b4384 | deoD | Isolate 1 | non-essential | purine-nucleoside phosphorylase                                                                               | 0.17  |
| b4384 | deoD | Isolate 2 | non-essential | purine-nucleoside phosphorylase                                                                               | -0.67 |
| b4385 | yjjJ | Isolate 1 | non-essential | predicted DNA-binding transcriptional regulator                                                               | -0.33 |
| b4385 | yjjJ | Isolate 2 | non-essential | predicted DNA-binding transcriptional regulator                                                               | -1.33 |
| b4386 | lplA | Isolate 1 | non-essential | lipoate-protein ligase A                                                                                      | -0.46 |
| b4386 | lplA | Isolate 2 | non-essential | lipoate-protein ligase A                                                                                      | 2.10  |
| b4387 | ytjB | Isolate 1 | non-essential | conserved protein                                                                                             | -1.07 |
| b4387 | ytjB | Isolate 2 | non-essential | conserved protein                                                                                             | 0.00  |
| b4388 | serB | Isolate 1 | non-essential | 3-phosphoserine phosphatase                                                                                   | 2.75  |
| b4388 | serB | Isolate 2 | non-essential | 3-phosphoserine phosphatase                                                                                   | -0.90 |
| b4389 | radA | Isolate 1 | non-essential | predicted repair protein                                                                                      | -1.11 |
| b4389 | radA | Isolate 2 | non-essential | predicted repair protein                                                                                      | 0.73  |
| b4390 | nadR | Isolate 1 | non-essential | bifunctional DNA-binding transcriptional repressor -!- NMN adenylyltransferase                                | -0.04 |
| b4390 | nadR | Isolate 2 | non-essential | bifunctional DNA-binding transcriptional repressor -!- NMN adenylyltransferase                                | -2.04 |
| b4391 | yjjK | Isolate 1 | non-essential | fused predicted transporter subunits -!- ATP-binding components of ABC superfamily                            | -0.56 |
| b4391 | yjjK | Isolate 2 | non-essential | fused predicted transporter subunits -!- ATP-binding components of ABC superfamily                            | 0.42  |
| b4392 | slt  | Isolate 1 | non-essential | lytic murein transglycosylase, soluble                                                                        | 0.34  |
| b4392 | slt  | Isolate 2 | non-essential | lytic murein transglycosylase, soluble                                                                        | 0.39  |
| b4393 | trpR | Isolate 1 | non-essential | DNA-binding transcriptional repressor, tryptophan-binding                                                     | 0.15  |
| b4393 | trpR | Isolate 2 | non-essential | DNA-binding transcriptional repressor, tryptophan-binding                                                     | -0.69 |
| b4394 | yjjX | Isolate 1 | non-essential | thiamin metabolism associated protein                                                                         | -1.20 |
| b4394 | yjjX | Isolate 2 | non-essential | thiamin metabolism associated protein                                                                         | -0.75 |
| b4395 | ytjC | Isolate 1 | non-essential | phosphoglyceromutase 2, co-factor independent                                                                 | -0.59 |
| b4395 | ytjC | Isolate 2 | non-essential | phosphoglyceromutase 2, co-factor independent                                                                 | 1.91  |
| b4396 | rob  | Isolate 1 | non-essential | DNA-binding transcriptional activator                                                                         | 1.83  |
| b4396 | rob  | Isolate 2 | non-essential | DNA-binding transcriptional activator                                                                         | 3.73  |
| b4397 | creA | Isolate 1 | non-essential | conserved protein                                                                                             | -0.61 |
| b4397 | creA | Isolate 2 | non-essential | conserved protein                                                                                             | 0.42  |
| b4398 | creB | Isolate 1 | non-essential | DNA-binding response regulator in two-component regulatory system with CreC                                   | 0.61  |
| b4398 | creB | Isolate 2 | non-essential | DNA-binding response regulator in two-component regulatory system with CreC                                   | -2.75 |
| b4399 | creC | Isolate 1 | non-essential | sensory histidine kinase in two-component regulatory system with CreB or PhoB, regulator of the CreBC regulon | -1.05 |
| b4399 | creC | Isolate 2 | non-essential | sensory histidine kinase in two-component regulatory system with CreB or PhoB, regulator of the CreBC regulon | -2.79 |

|             |      |           |               |                                                                                     |       |
|-------------|------|-----------|---------------|-------------------------------------------------------------------------------------|-------|
| b4400       | creD | Isolate 1 | non-essential | inner membrane protein                                                              | 0.17  |
| b4400       | creD | Isolate 2 | non-essential | inner membrane protein                                                              | -0.54 |
| b4401       | arcA | Isolate 1 | non-essential | DNA-binding response regulator in two-component regulatory system with ArcB or CpxA | 0.38  |
| b4401       | arcA | Isolate 2 | non-essential | DNA-binding response regulator in two-component regulatory system with ArcB or CpxA | 0.12  |
| b4402       | yjjY | Isolate 1 | non-essential | predicted protein                                                                   | 1.82  |
| b4402       | yjjY | Isolate 2 | non-essential | predicted protein                                                                   | 0.26  |
| b4403       | yjtD | Isolate 1 | non-essential | predicted rRNA methyltransferase                                                    | -0.11 |
| b4403       | yjtD | Isolate 2 | non-essential | predicted rRNA methyltransferase                                                    | -0.64 |
| b4404,b4405 | *    | Isolate 1 | *             | *                                                                                   | -0.21 |
| b4404,b4405 | *    | Isolate 2 | *             | *                                                                                   | 0.71  |
| b4406       | yaeP | Isolate 1 | non-essential | conserved protein                                                                   | -1.36 |
| b4406       | yaeP | Isolate 2 | non-essential | conserved protein                                                                   | 0.28  |
| b4407       | thiS | Isolate 1 | non-essential | sulphur carrier protein                                                             | 1.66  |
| b4407       | thiS | Isolate 2 | non-essential | sulphur carrier protein                                                             | -0.29 |
| b4409       | blr  | Isolate 1 | non-essential | beta-lactam resistance membrane protein                                             | -0.03 |
| b4410       | ecnA | Isolate 1 | non-essential | entericidin A membrane lipoprotein, antidote entericidin B                          | 1.69  |
| b4410       | ecnA | Isolate 2 | non-essential | entericidin A membrane lipoprotein, antidote entericidin B                          | 3.36  |
| b4411       | ecnB | Isolate 1 | non-essential | entericidin B membrane lipoprotein                                                  | 0.94  |
| b4411       | ecnB | Isolate 2 | non-essential | entericidin B membrane lipoprotein                                                  | -0.46 |
| b4412       | hokC | Isolate 1 | *             | toxic membrane protein, small                                                       | -0.36 |
| b4412       | hokC | Isolate 2 | *             | toxic membrane protein, small                                                       | -0.80 |
| b4415       | hokE | Isolate 1 | non-essential | toxic polypeptide, small                                                            | 0.33  |
| b4415       | hokE | Isolate 2 | non-essential | toxic polypeptide, small                                                            | 0.59  |
| b4428       | hokB | Isolate 1 | non-essential | toxic polypeptide, small                                                            | -2.00 |
| b4428       | hokB | Isolate 2 | non-essential | toxic polypeptide, small                                                            | -1.30 |
| b4453       | ldrD | Isolate 1 | unknown       | toxic polypeptide, small                                                            | -1.00 |
| b4453       | ldrD | Isolate 2 | unknown       | toxic polypeptide, small                                                            | 0.49  |
| b4455       | hokA | Isolate 1 | non-essential | toxic polypeptide, small                                                            | 0.83  |
| b4455       | hokA | Isolate 2 | non-essential | toxic polypeptide, small                                                            | -0.70 |
| b4460       | araH | Isolate 1 | non-essential | fused L-arabinose transporter subunits -!- membrane components of ABC superfamily   | -1.15 |
| b4460       | araH | Isolate 2 | non-essential | fused L-arabinose transporter subunits -!- membrane components of ABC superfamily   | 0.72  |
| b4461       | yfjD | Isolate 1 | non-essential | predicted inner membrane protein                                                    | -1.27 |
| b4461       | yfjD | Isolate 2 | non-essential | predicted inner membrane protein                                                    | -0.84 |
| b4462       | ygaR | Isolate 1 | non-essential | predicted protein                                                                   | -0.84 |
| b4462       | ygaR | Isolate 2 | non-essential | predicted protein                                                                   | -2.86 |
| b4463       | ygcU | Isolate 1 | non-essential | predicted FAD containing dehydrogenase                                              | -2.00 |
| b4463       | ygcU | Isolate 2 | non-essential | predicted FAD containing dehydrogenase                                              | 0.84  |
| b4464       | ygfQ | Isolate 1 | non-essential | predicted transporter                                                               | -0.88 |
| b4464       | ygfQ | Isolate 2 | non-essential | predicted transporter                                                               | 0.12  |
| b4465       | yggP | Isolate 1 | non-essential | predicted dehydrogenase                                                             | -1.98 |
| b4465       | yggP | Isolate 2 | non-essential | predicted dehydrogenase                                                             | -1.96 |
| b4466       | yghJ | Isolate 1 | non-essential | predicted inner membrane lipoprotein                                                | 0.67  |
| b4466       | yghJ | Isolate 2 | non-essential | predicted inner membrane lipoprotein                                                | 0.23  |

|       |      |           |               |                                                                                 |        |
|-------|------|-----------|---------------|---------------------------------------------------------------------------------|--------|
| b4467 | glcF | Isolate 1 | non-essential | glycolate oxidase iron-sulfur subunit                                           | 1.07   |
| b4467 | glcF | Isolate 2 | non-essential | glycolate oxidase iron-sulfur subunit                                           | -13.49 |
| b4468 | glcE | Isolate 1 | non-essential | glycolate oxidase FAD binding subunit                                           | 0.35   |
| b4468 | glcE | Isolate 2 | non-essential | glycolate oxidase FAD binding subunit                                           | 1.36   |
| b4469 | ygiQ | Isolate 1 | non-essential | conserved protein                                                               | 2.31   |
| b4469 | ygiQ | Isolate 2 | non-essential | conserved protein                                                               | -0.10  |
| b4470 | yhaM | Isolate 1 | non-essential | conserved protein                                                               | -0.43  |
| b4470 | yhaM | Isolate 2 | non-essential | conserved protein                                                               | -0.78  |
| b4471 | tdcG | Isolate 1 | non-essential | L-serine dehydratase 3                                                          | 0.75   |
| b4471 | tdcG | Isolate 2 | non-essential | L-serine dehydratase 3                                                          | 0.71   |
| b4472 | yhdP | Isolate 1 | non-essential | conserved membrane protein, predicted transporter                               | 0.19   |
| b4472 | yhdP | Isolate 2 | non-essential | conserved membrane protein, predicted transporter                               | -0.64  |
| b4473 | smf  | Isolate 1 | non-essential | conserved protein                                                               | -0.40  |
| b4473 | smf  | Isolate 2 | non-essential | conserved protein                                                               | 1.59   |
| b4475 | rtcA | Isolate 1 | non-essential | RNA 3'-terminal phosphate cyclase                                               | 0.38   |
| b4475 | rtcA | Isolate 2 | non-essential | RNA 3'-terminal phosphate cyclase                                               | -1.49  |
| b4476 | gntU | Isolate 1 | non-essential | gluconate transporter, low affinity GNT 1 system                                | 0.48   |
| b4476 | gntU | Isolate 2 | non-essential | gluconate transporter, low affinity GNT 1 system                                | -0.41  |
| b4477 | dgoA | Isolate 1 | non-essential | 2-oxo-3-deoxygalactonate 6-phosphate aldolase                                   | 1.54   |
| b4477 | dgoA | Isolate 2 | non-essential | 2-oxo-3-deoxygalactonate 6-phosphate aldolase                                   | 1.64   |
| b4479 | dgoR | Isolate 1 | non-essential | predicted DNA-binding transcriptional regulator                                 | -1.07  |
| b4479 | dgoR | Isolate 2 | non-essential | predicted DNA-binding transcriptional regulator                                 | -0.27  |
| b4480 | hdfR | Isolate 1 | non-essential | DNA-binding transcriptional regulator                                           | 0.01   |
| b4480 | hdfR | Isolate 2 | non-essential | DNA-binding transcriptional regulator                                           | 1.11   |
| b4482 | yigE | Isolate 1 | non-essential | predicted protein                                                               | -0.49  |
| b4482 | yigE | Isolate 2 | non-essential | predicted protein                                                               | 0.93   |
| b4483 | tatD | Isolate 1 | non-essential | DNase, magnesium-dependent                                                      | 1.71   |
| b4483 | tatD | Isolate 2 | non-essential | DNase, magnesium-dependent                                                      | 0.96   |
| b4484 | cpxP | Isolate 1 | non-essential | periplasmic protein combats stress                                              | -1.19  |
| b4484 | cpxP | Isolate 2 | non-essential | periplasmic protein combats stress                                              | -0.95  |
| b4485 | ytfR | Isolate 1 | non-essential | predicted sugar transporter subunit -! ATP-binding component of ABC superfamily | -0.88  |
| b4485 | ytfR | Isolate 2 | non-essential | predicted sugar transporter subunit -! ATP-binding component of ABC superfamily | 0.38   |
| b4488 | ilvG | Isolate 1 | *             | large subunit of acetolactate synthase II (pseudogene)                          | -0.74  |
| b4488 | ilvG | Isolate 2 | *             | large subunit of acetolactate synthase II (pseudogene)                          | 0.35   |
| b4490 | ycdN | Isolate 1 | *             | predicted membrane protein (pseudogene)                                         | 1.36   |
| b4490 | ycdN | Isolate 2 | *             | predicted membrane protein (pseudogene)                                         | 0.44   |
| b4493 | gapC | Isolate 1 | *             | glyceraldehyde-3-phosphate dehydrogenase C (pseudogene)                         | 0.84   |
| b4493 | gapC | Isolate 2 | *             | glyceraldehyde-3-phosphate dehydrogenase C (pseudogene)                         | 2.85   |
| b4494 | arpB | Isolate 1 | *             | predicted protein (pseudogene)                                                  | 0.32   |
| b4494 | arpB | Isolate 2 | *             | predicted protein (pseudogene)                                                  | 1.46   |
| b4495 | yedN | Isolate 1 | *             | predicted protein (pseudogene)                                                  | -2.44  |
| b4495 | yedN | Isolate 2 | *             | predicted protein (pseudogene)                                                  | -1.76  |
| b4496 | yedS | Isolate 1 | *             | predicted protein (pseudogene)                                                  | -1.97  |

|       |      |           |               |                                                                     |        |
|-------|------|-----------|---------------|---------------------------------------------------------------------|--------|
| b4496 | yedS | Isolate 2 | *             | predicted protein (pseudogene)                                      | -1.53  |
| b4497 | yeeL | Isolate 1 | *             | predicted protein (pseudogene)                                      | -1.64  |
| b4497 | yeeL | Isolate 2 | *             | predicted protein (pseudogene)                                      | -2.45  |
| b4498 | gatR | Isolate 1 | *             | DNA-binding transcriptional regulator (pseudogene)                  | 0.71   |
| b4498 | gatR | Isolate 2 | *             | DNA-binding transcriptional regulator (pseudogene)                  | 0.72   |
| b4499 | molR | Isolate 1 | *             | DNA-binding transcriptional regulator (pseudogene)                  | 0.20   |
| b4499 | molR | Isolate 2 | *             | DNA-binding transcriptional regulator (pseudogene)                  | 0.15   |
| b4500 | yfaS | Isolate 1 | *             | predicted protein (pseudogene)                                      | 0.30   |
| b4500 | yfaS | Isolate 2 | *             | predicted protein (pseudogene)                                      | -0.58  |
| b4501 | torI | Isolate 1 | non-essential | response regulator inhibitor for tor operon                         | 0.44   |
| b4501 | torI | Isolate 2 | non-essential | response regulator inhibitor for tor operon                         | -0.54  |
| b4502 | yeiW | Isolate 1 | non-essential | conserved protein                                                   | -0.98  |
| b4502 | yeiW | Isolate 2 | non-essential | conserved protein                                                   | 0.09   |
| b4504 | ykfH | Isolate 1 | non-essential | predicted protein                                                   | -1.54  |
| b4505 | ykgN | Isolate 1 | non-essential | predicted IS protein                                                | 1.00   |
| b4505 | ykgN | Isolate 2 | non-essential | predicted IS protein                                                | 1.18   |
| b4506 | ykgM | Isolate 1 | non-essential | predicted ribosomal protein                                         | 0.86   |
| b4506 | ykgM | Isolate 2 | non-essential | predicted ribosomal protein                                         | 0.40   |
| b4508 | ybcD | Isolate 1 | *             | DLP12 prophage; predicted replication protein fragment (pseudogene) | 0.25   |
| b4508 | ybcD | Isolate 2 | *             | DLP12 prophage; predicted replication protein fragment (pseudogene) | 0.76   |
| b4509 | ylcG | Isolate 1 | non-essential | DLP12 prophage; predicted protein                                   | 0.67   |
| b4509 | ylcG | Isolate 2 | non-essential | DLP12 prophage; predicted protein                                   | -0.37  |
| b4510 | rzoD | Isolate 1 | non-essential | DLP12 prophage; predicted lipoprotein                               | 0.05   |
| b4510 | rzoD | Isolate 2 | non-essential | DLP12 prophage; predicted lipoprotein                               | -0.47  |
| b4511 | ybdZ | Isolate 1 | non-essential | conserved protein                                                   | -1.26  |
| b4511 | ybdZ | Isolate 2 | non-essential | conserved protein                                                   | 0.64   |
| b4512 | ybdD | Isolate 1 | non-essential | conserved protein                                                   | -0.66  |
| b4512 | ybdD | Isolate 2 | non-essential | conserved protein                                                   | -0.09  |
| b4513 | kdpF | Isolate 1 | non-essential | potassium ion accessory transporter subunit                         | -0.47  |
| b4513 | kdpF | Isolate 2 | non-essential | potassium ion accessory transporter subunit                         | 0.54   |
| b4514 | ybfQ | Isolate 1 | non-essential | predicted transposase                                               | 2.23   |
| b4514 | ybfQ | Isolate 2 | non-essential | predicted transposase                                               | -10.64 |
| b4515 | ybgT | Isolate 1 | non-essential | conserved protein                                                   | -1.41  |
| b4515 | ybgT | Isolate 2 | non-essential | conserved protein                                                   | -0.80  |
| b4517 | gnsA | Isolate 1 | non-essential | predicted regulator of phosphatidylethanolamine synthesis           | 0.25   |
| b4517 | gnsA | Isolate 2 | non-essential | predicted regulator of phosphatidylethanolamine synthesis           | -0.41  |
| b4518 | ymdF | Isolate 1 | non-essential | conserved protein                                                   | 0.87   |
| b4518 | ymdF | Isolate 2 | non-essential | conserved protein                                                   | 0.48   |
| b4519 | icdC | Isolate 1 | *             | conserved protein (pseudogene)                                      | -1.39  |
| b4519 | icdC | Isolate 2 | *             | conserved protein (pseudogene)                                      | -3.27  |
| b4520 | ymgF | Isolate 1 | non-essential | predicted protein                                                   | -0.03  |
| b4520 | ymgF | Isolate 2 | non-essential | predicted protein                                                   | 0.35   |
| b4521 | ymgH | Isolate 1 | non-essential | predicted protein                                                   | -12.39 |



|       |      |           |               |                                                    |       |
|-------|------|-----------|---------------|----------------------------------------------------|-------|
| b4521 | ymgH | Isolate 2 | non-essential | predicted protein                                  | 4.97  |
| b4524 | ymjB | Isolate 1 | non-essential | predicted protein                                  | 1.46  |
| b4524 | ymjB | Isolate 2 | non-essential | predicted protein                                  | 0.53  |
| b4525 | ymjC | Isolate 1 | non-essential | predicted oxidoreductase                           | -0.69 |
| b4526 | ydaE | Isolate 1 | non-essential | Rac prophage; conserved protein                    | 0.84  |
| b4526 | ydaE | Isolate 2 | non-essential | Rac prophage; conserved protein                    | -0.40 |
| b4527 | ydaF | Isolate 1 | non-essential | Rac prophage; predicted protein                    | -0.28 |
| b4527 | ydaF | Isolate 2 | non-essential | Rac prophage; predicted protein                    | -0.89 |
| b4528 | rzoR | Isolate 1 | non-essential | Rac prophage; predicted lipoprotein                | 0.14  |
| b4528 | rzoR | Isolate 2 | non-essential | Rac prophage; predicted lipoprotein                | -0.97 |
| b4529 | ydbJ | Isolate 1 | non-essential | predicted protein                                  | 0.56  |
| b4529 | ydbJ | Isolate 2 | non-essential | predicted protein                                  | 0.08  |
| b4530 | yncK | Isolate 1 | *             | predicted transposase, N-ter fragment (pseudogene) | -0.39 |
| b4530 | yncK | Isolate 2 | *             | predicted transposase, N-ter fragment (pseudogene) | -0.17 |
| b4531 | yncK | Isolate 1 | *             | predicted transposase, C-ter fragment (pseudogene) | -0.59 |
| b4532 | yncN | Isolate 1 | non-essential | predicted protein                                  | 0.38  |
| b4532 | yncN | Isolate 2 | non-essential | predicted protein                                  | -1.07 |
| b4533 | ynfO | Isolate 1 | non-essential | Qin prophage; predicted protein                    | 0.15  |
| b4533 | ynfO | Isolate 2 | non-essential | Qin prophage; predicted protein                    | -0.47 |
| b4534 | ynfP | Isolate 1 | *             | predicted protein (pseudogene)                     | -1.53 |
| b4534 | ynfP | Isolate 2 | *             | predicted protein (pseudogene)                     | -0.14 |
| b4535 | yniD | Isolate 1 | non-essential | predicted protein                                  | -0.34 |
| b4535 | yniD | Isolate 2 | non-essential | predicted protein                                  | -0.17 |
| b4536 | yobH | Isolate 1 | non-essential | predicted protein                                  | -0.14 |
| b4536 | yobH | Isolate 2 | non-essential | predicted protein                                  | 0.40  |
| b4537 | yecJ | Isolate 1 | non-essential | predicted protein                                  | 0.65  |
| b4537 | yecJ | Isolate 2 | non-essential | predicted protein                                  | -0.94 |
| b4538 | yoeF | Isolate 1 | non-essential | conserved protein                                  | 0.86  |
| b4538 | yoeF | Isolate 2 | non-essential | conserved protein                                  | 0.45  |
| b4539 | yoeB | Isolate 1 | non-essential | toxin of the YoeB-YefM toxin-antitoxin system      | 0.34  |
| b4539 | yoeB | Isolate 2 | non-essential | toxin of the YoeB-YefM toxin-antitoxin system      | 2.90  |
| b4541 | yehK | Isolate 1 | non-essential | predicted protein                                  | -0.91 |
| b4541 | yehK | Isolate 2 | non-essential | predicted protein                                  | -0.50 |
| b4542 | yohO | Isolate 1 | non-essential | predicted protein                                  | 0.46  |
| b4542 | yohO | Isolate 2 | non-essential | predicted protein                                  | -0.44 |
| b4543 | ypaA | Isolate 1 | *             | predicted protein (pseudogene)                     | -0.71 |
| b4544 | yfbW | Isolate 1 | non-essential | conserved protein                                  | -0.97 |
| b4544 | yfbW | Isolate 2 | non-essential | conserved protein                                  | -1.78 |
| b4545 | ypdJ | Isolate 1 | non-essential | predicted protein                                  | -0.49 |
| b4545 | ypdJ | Isolate 2 | non-essential | predicted protein                                  | 0.95  |
| b4546 | ypeB | Isolate 1 | non-essential | predicted protein                                  | -0.19 |
| b4546 | ypeB | Isolate 2 | non-essential | predicted protein                                  | -1.92 |
| b4547 | ypfN | Isolate 1 | non-essential | predicted protein                                  | -0.63 |

|        |      |           |               |                                                                       |        |
|--------|------|-----------|---------------|-----------------------------------------------------------------------|--------|
| b4547  | ypfN | Isolate 2 | non-essential | predicted protein                                                     | 0.74   |
| b4548  | ypjJ | Isolate 1 | non-essential | predicted protein                                                     | -1.07  |
| b4548  | ypjJ | Isolate 2 | non-essential | predicted protein                                                     | -0.61  |
| b4550  | yhdL | Isolate 1 | non-essential | conserved protein                                                     | 1.68   |
| b4550  | yhdL | Isolate 2 | non-essential | conserved protein                                                     | 0.49   |
| b4551  | yheV | Isolate 1 | non-essential | predicted protein                                                     | -0.45  |
| b4551  | yheV | Isolate 2 | non-essential | predicted protein                                                     | 0.13   |
| b4553  | ysaB | Isolate 1 | non-essential | predicted protein                                                     | -0.82  |
| b4553  | ysaB | Isolate 2 | non-essential | predicted protein                                                     | 0.46   |
| b4554  | yibT | Isolate 1 | non-essential | predicted protein                                                     | -0.61  |
| b4554  | yibT | Isolate 2 | non-essential | predicted protein                                                     | -2.75  |
| b4555  | yicS | Isolate 1 | non-essential | predicted protein                                                     | -0.21  |
| b4556  | ysdC | Isolate 1 | *             | predicted protein (pseudogene)                                        | 1.40   |
| b4556  | ysdC | Isolate 2 | *             | predicted protein (pseudogene)                                        | -0.96  |
| b4558  | yifL | Isolate 1 | non-essential | predicted lipoprotein                                                 | 0.50   |
| b4558  | yifL | Isolate 2 | non-essential | predicted lipoprotein                                                 | 1.00   |
| b4559  | yjdO | Isolate 1 | non-essential | predicted protein                                                     | 0.75   |
| b4559  | yjdO | Isolate 2 | non-essential | predicted protein                                                     | 0.30   |
| b4561  | insM | Isolate 1 | *             | KpLE2 phage-like element; predicted transposase fragment (pseudogene) | 0.19   |
| b4561  | insM | Isolate 2 | *             | KpLE2 phage-like element; predicted transposase fragment (pseudogene) | 2.14   |
| b4565  | sgcB | Isolate 1 | non-essential | predicted enzyme IIB component of PTS                                 | 0.96   |
| b4566  | yjhX | Isolate 1 | non-essential | conserved protein                                                     | 0.17   |
| b4567  | yjjZ | Isolate 1 | non-essential | predicted protein                                                     | 0.08   |
| b4567  | yjjZ | Isolate 2 | non-essential | predicted protein                                                     | 0.21   |
| b4569  | yhcE | Isolate 1 | *             | predicted protein (pseudogene)                                        | 0.86   |
| b4569  | yhcE | Isolate 2 | *             | predicted protein (pseudogene)                                        | -1.11  |
| b4571  | wbbL | Isolate 1 | *             | lipopolysaccharide biosynthesis protein (pseudogene)                  | -1.83  |
| b4571  | wbbL | Isolate 2 | *             | lipopolysaccharide biosynthesis protein (pseudogene)                  | -1.02  |
| b4572  | ylbE | Isolate 1 | *             | predicted protein (pseudogene)                                        | 0.17   |
| b4572  | ylbE | Isolate 2 | *             | predicted protein (pseudogene)                                        | 1.38   |
| b4574  | yciX | Isolate 1 | *             | predicted protein (pseudogene)                                        | -2.31  |
| b4574  | yciX | Isolate 2 | *             | predicted protein (pseudogene)                                        | 0.66   |
| b4575  | yjgX | Isolate 1 | *             | KpLE2 phage-like element; predicted protein (pseudogene)              | 0.26   |
| b4575  | yjgX | Isolate 2 | *             | KpLE2 phage-like element; predicted protein (pseudogene)              | 1.71   |
| CSCR   | *    | Isolate 1 | *             | *                                                                     | 0.28   |
| CSCR   | *    | Isolate 2 | *             | *                                                                     | -0.53  |
| JW2207 | *    | Isolate 1 | *             | *                                                                     | 1.72   |
| JW2207 | *    | Isolate 2 | *             | *                                                                     | 3.41   |
| JW2574 | *    | Isolate 1 | *             | *                                                                     | -0.63  |
| JW2574 | *    | Isolate 2 | *             | *                                                                     | -0.36  |
| JW2606 | *    | Isolate 1 | *             | *                                                                     | -11.86 |
| JW2606 | *    | Isolate 2 | *             | *                                                                     | -0.01  |
| JW2616 | *    | Isolate 1 | *             | *                                                                     | -1.75  |

|          |   |           |   |   |       |
|----------|---|-----------|---|---|-------|
| JW2616   | * | Isolate 2 | * | * | -2.93 |
| JW2623.5 | * | Isolate 1 | * | * | -1.13 |
| JW4016   | * | Isolate 1 | * | * | 0.82  |
| JW4016   | * | Isolate 2 | * | * | 1.95  |
| JW5015   | * | Isolate 1 | * | * | 2.88  |
| JW5015   | * | Isolate 2 | * | * | 0.69  |
| JW5025   | * | Isolate 1 | * | * | 1.61  |
| JW5025   | * | Isolate 2 | * | * | 1.33  |
| JW5028   | * | Isolate 1 | * | * | -2.50 |
| JW5028   | * | Isolate 2 | * | * | -0.38 |
| JW5029   | * | Isolate 1 | * | * | 1.45  |
| JW5029   | * | Isolate 2 | * | * | 0.87  |
| JW5032   | * | Isolate 1 | * | * | 0.98  |
| JW5032   | * | Isolate 2 | * | * | 1.10  |
| JW5047   | * | Isolate 1 | * | * | 1.41  |
| JW5047   | * | Isolate 2 | * | * | 0.22  |
| JW5064   | * | Isolate 1 | * | * | -0.42 |
| JW5064   | * | Isolate 2 | * | * | 1.37  |
| JW5068   | * | Isolate 1 | * | * | 0.44  |
| JW5068   | * | Isolate 2 | * | * | 0.86  |
| JW5069   | * | Isolate 1 | * | * | 0.82  |
| JW5069   | * | Isolate 2 | * | * | 1.51  |
| JW5075   | * | Isolate 1 | * | * | -1.25 |
| JW5075   | * | Isolate 2 | * | * | 1.84  |
| JW5101   | * | Isolate 1 | * | * | 2.37  |
| JW5101   | * | Isolate 2 | * | * | 0.88  |
| JW5115   | * | Isolate 1 | * | * | 0.92  |
| JW5115   | * | Isolate 2 | * | * | 0.29  |
| JW5140   | * | Isolate 1 | * | * | 0.36  |
| JW5140   | * | Isolate 2 | * | * | 0.98  |
| JW5148   | * | Isolate 1 | * | * | -1.60 |
| JW5148   | * | Isolate 2 | * | * | 1.49  |
| JW5163   | * | Isolate 1 | * | * | 0.23  |
| JW5163   | * | Isolate 2 | * | * | -1.48 |
| JW5167   | * | Isolate 1 | * | * | 2.59  |
| JW5167   | * | Isolate 2 | * | * | 0.76  |
| JW5183   | * | Isolate 1 | * | * | -0.76 |
| JW5183   | * | Isolate 2 | * | * | 0.12  |
| JW5191   | * | Isolate 1 | * | * | -0.84 |
| JW5191   | * | Isolate 2 | * | * | 0.54  |
| JW5194   | * | Isolate 1 | * | * | 0.02  |
| JW5194   | * | Isolate 2 | * | * | -0.19 |
| JW5231   | * | Isolate 1 | * | * | -1.52 |

|        |   |           |   |   |       |
|--------|---|-----------|---|---|-------|
| JW5231 | * | Isolate 2 | * | * | -0.93 |
| JW5236 | * | Isolate 1 | * | * | -0.73 |
| JW5236 | * | Isolate 2 | * | * | 0.61  |
| JW5266 | * | Isolate 1 | * | * | -0.19 |
| JW5266 | * | Isolate 2 | * | * | 0.10  |
| JW5305 | * | Isolate 1 | * | * | -1.83 |
| JW5305 | * | Isolate 2 | * | * | 0.41  |
| JW5320 | * | Isolate 1 | * | * | 1.07  |
| JW5320 | * | Isolate 2 | * | * | 0.91  |
| JW5321 | * | Isolate 1 | * | * | -0.13 |
| JW5321 | * | Isolate 2 | * | * | 0.12  |
| JW5337 | * | Isolate 1 | * | * | 2.52  |
| JW5337 | * | Isolate 2 | * | * | 1.20  |
| JW5357 | * | Isolate 1 | * | * | 2.73  |
| JW5357 | * | Isolate 2 | * | * | 1.80  |
| JW5360 | * | Isolate 1 | * | * | 0.00  |
| JW5360 | * | Isolate 2 | * | * | 0.00  |
| JW5392 | * | Isolate 1 | * | * | 2.10  |
| JW5392 | * | Isolate 2 | * | * | 1.75  |
| JW5398 | * | Isolate 1 | * | * | 0.09  |
| JW5398 | * | Isolate 2 | * | * | 0.22  |
| JW5410 | * | Isolate 1 | * | * | 0.76  |
| JW5410 | * | Isolate 2 | * | * | 1.48  |
| JW5411 | * | Isolate 1 | * | * | 0.57  |
| JW5411 | * | Isolate 2 | * | * | 0.19  |
| JW5417 | * | Isolate 1 | * | * | 0.70  |
| JW5417 | * | Isolate 2 | * | * | -1.18 |
| JW5436 | * | Isolate 1 | * | * | -1.79 |
| JW5436 | * | Isolate 2 | * | * | -0.97 |
| JW5447 | * | Isolate 1 | * | * | -1.49 |
| JW5447 | * | Isolate 2 | * | * | 0.71  |
| JW5452 | * | Isolate 1 | * | * | 0.83  |
| JW5452 | * | Isolate 2 | * | * | -1.33 |
| JW5471 | * | Isolate 1 | * | * | 0.06  |
| JW5471 | * | Isolate 2 | * | * | 0.01  |
| JW5474 | * | Isolate 1 | * | * | 0.02  |
| JW5474 | * | Isolate 2 | * | * | 3.48  |
| JW5480 | * | Isolate 1 | * | * | -0.53 |
| JW5480 | * | Isolate 2 | * | * | -1.03 |
| JW5497 | * | Isolate 1 | * | * | 0.92  |
| JW5497 | * | Isolate 2 | * | * | -0.48 |
| JW5552 | * | Isolate 1 | * | * | -0.13 |
| JW5552 | * | Isolate 2 | * | * | -0.35 |

|        |   |           |   |   |       |
|--------|---|-----------|---|---|-------|
| JW5554 | * | Isolate 1 | * | * | 0.91  |
| JW5554 | * | Isolate 2 | * | * | 0.86  |
| JW5565 | * | Isolate 1 | * | * | 0.71  |
| JW5565 | * | Isolate 2 | * | * | 0.71  |
| JW5572 | * | Isolate 1 | * | * | 2.48  |
| JW5572 | * | Isolate 2 | * | * | 1.88  |
| JW5635 | * | Isolate 1 | * | * | 1.96  |
| JW5635 | * | Isolate 2 | * | * | 0.98  |
| JW5639 | * | Isolate 1 | * | * | -0.34 |
| JW5639 | * | Isolate 2 | * | * | -1.12 |
| JW5649 | * | Isolate 1 | * | * | 1.11  |
| JW5649 | * | Isolate 2 | * | * | 1.65  |
| JW5661 | * | Isolate 1 | * | * | 1.20  |
| JW5661 | * | Isolate 2 | * | * | 1.19  |
| JW5662 | * | Isolate 1 | * | * | 0.85  |
| JW5662 | * | Isolate 2 | * | * | 1.67  |
| JW5675 | * | Isolate 1 | * | * | -1.42 |
| JW5675 | * | Isolate 2 | * | * | 0.51  |
| JW5712 | * | Isolate 1 | * | * | -0.38 |
| JW5712 | * | Isolate 2 | * | * | -0.53 |
| JW5719 | * | Isolate 1 | * | * | 0.00  |
| JW5719 | * | Isolate 2 | * | * | -0.33 |
| JW5720 | * | Isolate 1 | * | * | -1.42 |
| JW5720 | * | Isolate 2 | * | * | 1.57  |
| JW5728 | * | Isolate 1 | * | * | 3.18  |
| JW5728 | * | Isolate 2 | * | * | 0.25  |
| JW5751 | * | Isolate 1 | * | * | 0.66  |
| JW5751 | * | Isolate 2 | * | * | 0.18  |
| JW5765 | * | Isolate 1 | * | * | -0.28 |
| JW5765 | * | Isolate 2 | * | * | 0.25  |
| JW5766 | * | Isolate 1 | * | * | -2.04 |
| JW5766 | * | Isolate 2 | * | * | 3.32  |
| JW5781 | * | Isolate 1 | * | * | -0.39 |
| JW5781 | * | Isolate 2 | * | * | 0.18  |
| JW5799 | * | Isolate 1 | * | * | 1.08  |
| JW5799 | * | Isolate 2 | * | * | -0.50 |

<sup>a</sup> b-number represent "Blattner" number. In some cases, genes not assigned with b-number are represented as JW number.

<sup>b</sup> The *ygbT* deletion mutant strain is screened against the recipient F non essential deletion [1] or essential [2] hypomorphic strains on a genome-wide scale.

<sup>c</sup> Two independent single gene deletion mutant isolates from Keio collection were used in the study.

<sup>d</sup> 149 hypomorphic, Kan<sup>R</sup>- marked, strains with C-terminal Sequential Peptide Affinity (SPA)-tags on essential genes involved in conserved bacterial processes were included in the array collection [2].

<sup>e</sup> The non-essential represent F recipient *E. coli* "Keio" collection strains comprising of 3,967 "Isolate 1" and 3,955 "Isolate 2" deletion strains [3] used in the study.

<sup>f</sup> A quantitative interaction score (*S*) for *ygbT* deletion mutant screen is calculated to quantify the strength and confidence of epistasis determined for each mutant gene pair

based on an algorithm implemented for yeast SGA [4].

Negative *S*-scores correspond to aggravating interactions, while positive *S*-scores to alleviating interactions.

Asterisk represents the old JW numbers for which there is no information on the gene name or the essentiality on the gene information is not available.

**References:**

1. Baba, T. et al. Construction of Escherichia coli K-12 in-frame, single-gene knockout mutants: the Keio collection. *Mol. Syst. Biol.* 2, 2006.0008 (2006).
2. Butland, G. et al. Interaction network containing conserved and essential protein complexes in Escherichia coli. *Nature* 433, 531-537 (2005).
3. Butland, G., Babu, M. et al. eSGA: E. coli synthetic genetic array analysis. *Nat Methods* 5, 789-795 (2008).
4. Collins, S. R., Schuldiner, M., Krogan, N. J. & Weissman, J. S. A strategy for extracting and analyzing large-scale quantitative epistatic interaction data. *Genome Biol.* 7, R63 (2006).

**Table S4.** Functional Enrichment Analysis for Gene Ontology Terms Spanning Various Biological Processes Using the Interaction Scores from *the ygbT*  $\Delta$  Genome-Wide Genetic Screen

| Description of GO category <sup>a</sup>                          | Number of genes in the GO category <sup>b</sup> | Number of genes matching the GO category <sup>c</sup> | <i>P</i> -value <sup>d</sup> | <i>Q</i> -value <sup>e</sup> |
|------------------------------------------------------------------|-------------------------------------------------|-------------------------------------------------------|------------------------------|------------------------------|
| GO:0000160_two_component_signal_transduction_system_phosphorelay | 160                                             | 160                                                   | 0                            | 0                            |
| GO:0001539_ciliary_or_flagellar_motility                         | 50                                              | 50                                                    | 0                            | 0                            |
| GO:0005975_carbohydrate_metabolic_process                        | 258                                             | 238                                                   | 0                            | 0                            |
| GO:0006096_glycolysis                                            | 54                                              | 48                                                    | 0                            | 0                            |
| GO:0006099_tricarboxylic_acid_cycle                              | 42                                              | 42                                                    | 0                            | 0                            |
| GO:0006260_DNA_replication                                       | 92                                              | 73                                                    | 0                            | 0                            |
| GO:0006364_rRNA_processing                                       | 42                                              | 41                                                    | 0                            | 0                            |
| GO:0006412_translation                                           | 208                                             | 95                                                    | 0                            | 0                            |
| GO:0006414_translational_elongation                              | 12                                              | 10                                                    | 0                            | 0                            |
| GO:0006418_tRNA_aminoacylation_for_protein_translation           | 42                                              | 23                                                    | 0                            | 0                            |
| GO:0006754_ATP_biosynthetic_process                              | 12                                              | 12                                                    | 0                            | 0                            |
| GO:0006935_chemotaxis                                            | 44                                              | 44                                                    | 0                            | 0                            |
| GO:0007049_cell_cycle                                            | 108                                             | 62                                                    | 0                            | 0                            |
| GO:0007059_chromosome_segregation                                | 12                                              | 8                                                     | 0                            | 0                            |
| GO:0007076_mitotic_chromosome_condensation                       | 12                                              | 9                                                     | 0                            | 0                            |
| GO:0007155_cell_adhesion                                         | 68                                              | 68                                                    | 0                            | 0                            |
| GO:0007165_signal_transduction                                   | 86                                              | 86                                                    | 0                            | 0                            |
| GO:0008652_amino_acid_biosynthetic_process                       | 210                                             | 197                                                   | 0                            | 0                            |
| GO:0009116_nucleoside_metabolic_process                          | 24                                              | 23                                                    | 0                            | 0                            |
| GO:0009231_riboflavin_biosynthetic_process                       | 10                                              | 4                                                     | 0                            | 0                            |
| GO:0015986_ATP_synthesis_coupled_proton_transport                | 16                                              | 16                                                    | 0                            | 0                            |
| GO:0016310_phosphorylation                                       | 72                                              | 71                                                    | 0                            | 0                            |
| GO:0018106_peptidyl_histidine_phosphorylation                    | 56                                              | 56                                                    | 0                            | 0                            |
| GO:0019439_aromatic_compound_catabolic_process                   | 26                                              | 26                                                    | 0                            | 0                            |
| GO:0042128_nitrate_assimilation                                  | 38                                              | 37                                                    | 0                            | 0                            |
| GO:0045449_regulation_of_transcription                           | 126                                             | 125                                                   | 0                            | 0                            |
| GO:0045454_cell_redox_homeostasis                                | 30                                              | 30                                                    | 0                            | 0                            |
| GO:0046677_response_to_antibiotic                                | 124                                             | 99                                                    | 0                            | 0                            |
| GO:0051301_cell_division                                         | 104                                             | 60                                                    | 0                            | 0                            |
| GO:0006811_ion_transport                                         | 202                                             | 195                                                   | 4.02E-14                     | 7.31E-12                     |

|                                                                |     |     |          |             |
|----------------------------------------------------------------|-----|-----|----------|-------------|
| GO:0006461_protein_complex_assembly                            | 10  | 10  | 1.01E-13 | 1.85E-11    |
| GO:0008610_lipid_biosynthetic_process                          | 58  | 35  | 1.90E-13 | 3.46E-11    |
| GO:0006508_proteolysis                                         | 140 | 124 | 2.81E-13 | 5.11E-11    |
| GO:0008033_tRNA_processing                                     | 78  | 71  | 1.30E-12 | 2.36E-10    |
| GO:0006950_response_to_stress                                  | 158 | 149 | 1.61E-12 | 2.92E-10    |
| GO:0015992_proton_transport                                    | 32  | 32  | 1.81E-12 | 3.29E-10    |
| GO:0009089_lysine_biosynthetic_process_via_diaminopimelate     | 12  | 4   | 1.83E-12 | 3.33E-10    |
| GO:0006353_transcription_termination                           | 12  | 7   | 5.34E-12 | 9.72E-10    |
| GO:0042773_ATP_synthesis_coupled_electron_transport            | 16  | 16  | 1.37E-11 | 2.49E-09    |
| GO:0006310_DNA_recombination                                   | 194 | 87  | 1.54E-11 | 2.79E-09    |
| GO:0006457_protein_folding                                     | 50  | 45  | 2.06E-10 | 3.75E-08    |
| GO:0015031_protein_transport                                   | 102 | 91  | 6.81E-10 | 1.24E-07    |
| GO:0006417_regulation_of_translation                           | 24  | 15  | 7.51E-10 | 1.37E-07    |
| GO:0009103_lipopolysaccharide_biosynthetic_process             | 142 | 136 | 2.56E-09 | 4.66E-07    |
| GO:0009085_lysine_biosynthetic_process                         | 22  | 12  | 9.91E-09 | 1.80E-06    |
| GO:0000105_histidine_biosynthetic_process                      | 22  | 20  | 1.44E-08 | 2.62E-06    |
| GO:0006164_purine_nucleotide_biosynthetic_process              | 34  | 31  | 3.86E-08 | 7.03E-06    |
| GO:0006826_iron_ion_transport                                  | 74  | 71  | 4.26E-08 | 7.76E-06    |
| GO:0006269_DNA_replication_synthesis_of_RNA_primer             | 14  | 11  | 4.28E-08 | 7.79E-06    |
| GO:0006865_amino_acid_transport                                | 144 | 144 | 6.25E-08 | 1.14E-05    |
| GO:0006633_fatty_acid_biosynthetic_process                     | 34  | 18  | 8.99E-08 | 1.64E-05    |
| GO:0006725_cellular_aromatic_compound_metabolic_process        | 26  | 26  | 1.75E-07 | 3.19E-05    |
| GO:0009245_lipid_A_biosynthetic_process                        | 22  | 14  | 2.90E-07 | 5.28E-05    |
| GO:0008299_isoprenoid_biosynthetic_process                     | 32  | 19  | 4.23E-07 | 7.70E-05    |
| GO:0006396_RNA_processing                                      | 32  | 27  | 5.04E-07 | 9.17E-05    |
| GO:0009058_biosynthetic_process                                | 132 | 114 | 6.89E-07 | 0.000125408 |
| GO:0001522_pseudouridine_synthesis                             | 20  | 20  | 8.65E-07 | 0.000157353 |
| GO:0044237_cellular_metabolic_process                          | 30  | 29  | 9.63E-07 | 0.000175314 |
| GO:0006120_mitochondrial_electron_transport_NADH_to_ubiquinone | 26  | 26  | 1.90E-06 | 0.000345431 |
| GO:0006541_glutamine_metabolic_process                         | 30  | 27  | 2.74E-06 | 0.000497974 |
| GO:0017004_cytochrome_complex_assembly                         | 20  | 20  | 3.19E-06 | 0.00058041  |
| GO:0009073_aromatic_amino_acid_family_biosynthetic_process     | 44  | 44  | 4.01E-06 | 0.000729628 |
| GO:0006313_transposition_DNA_mediated                          | 160 | 48  | 4.07E-06 | 0.000741302 |
| GO:0009306_protein_secretion                                   | 64  | 60  | 5.65E-06 | 0.001027738 |
| GO:0009597_detection_of_virus                                  | 24  | 24  | 7.60E-06 | 0.001383852 |



|                                                                                |     |     |           |             |
|--------------------------------------------------------------------------------|-----|-----|-----------|-------------|
| GO:0046718_entry_of_virus_into_host_cell                                       | 24  | 24  | 7.60E-06  | 0.001383852 |
| GO:0009236_cobalamin_biosynthetic_process                                      | 20  | 18  | 1.14E-05  | 0.00206702  |
| GO:0006281_DNA_repair                                                          | 134 | 128 | 1.54E-05  | 0.002796467 |
| GO:0006974_response_to_DNA_damage_stimulus                                     | 116 | 110 | 1.96E-05  | 0.003571938 |
| GO:0016114_terpenoid_biosynthetic_process                                      | 14  | 5   | 2.03E-05  | 0.003700504 |
| GO:0006044_N_acetylglucosamine_metabolic_process                               | 10  | 8   | 4.39E-05  | 0.007995626 |
| GO:0019344_cysteine_biosynthetic_process                                       | 16  | 16  | 6.62E-05  | 0.012051415 |
| GO:0043213_bacteriocin_transport                                               | 12  | 12  | 8.29E-05  | 0.015093336 |
| GO:0015074_DNA_integration                                                     | 70  | 34  | 0.0001042 | 0.018961143 |
| GO:0009250_glucan_biosynthetic_process                                         | 12  | 12  | 0.0001871 | 0.034055421 |
| GO:0015740_C4_dicarboxylate_transport                                          | 10  | 10  | 0.0002845 | 0.051778816 |
| GO:0006139_nucleobase_nucleoside_nucleotide_and_nucleic_acid_metabolic_process | 22  | 20  | 0.000385  | 0.070077357 |
| GO:0006259_DNA_metabolic_process                                               | 22  | 20  | 0.0004897 | 0.089124025 |
| GO:0006306_DNA_methylation                                                     | 12  | 12  | 0.0005901 | 0.107399369 |
| GO:0008643_carbohydrate_transport                                              | 206 | 200 | 0.0007023 | 0.12780961  |
| GO:0007047_cell_wall_organization                                              | 116 | 96  | 0.0007534 | 0.137110205 |
| GO:0015891_siderophore_transport                                               | 12  | 10  | 0.001179  | 0.214582198 |
| GO:0006526_arginine_biosynthetic_process                                       | 26  | 26  | 0.0014638 | 0.266417129 |
| GO:0006807_nitrogen_compound_metabolic_process                                 | 22  | 20  | 0.0019481 | 0.354549926 |
| GO:0006779_porphyrin_biosynthetic_process                                      | 32  | 18  | 0.0022779 | 0.414576911 |
| GO:0015833_peptide_transport                                                   | 22  | 22  | 0.0026026 | 0.473667448 |
| GO:0006221_pyrimidine_nucleotide_biosynthetic_process                          | 24  | 21  | 0.0041792 | 0.760619901 |
| GO:0008615_pyridoxine_biosynthetic_process                                     | 14  | 14  | 0.0045821 | 0.833948421 |
| GO:0000103_sulfate_assimilation                                                | 10  | 10  | 0.9344912 | 1           |
| GO:0000162_tryptophan_biosynthetic_process                                     | 12  | 12  | 0.1984353 | 1           |
| GO:0000271_polysaccharide_biosynthetic_process                                 | 18  | 18  | 0.3988569 | 1           |
| GO:0000917_barrier_septum_formation                                            | 18  | 9   | 0.1800521 | 1           |
| GO:0006004_fucose_metabolic_process                                            | 14  | 14  | 0.1089844 | 1           |
| GO:0006006_glucose_metabolic_process                                           | 28  | 27  | 0.0815032 | 1           |
| GO:0006012_galactose_metabolic_process                                         | 10  | 10  | 0.2528398 | 1           |
| GO:0006071_glycerol_metabolic_process                                          | 30  | 30  | 0.2843478 | 1           |
| GO:0006094_gluconeogenesis                                                     | 14  | 14  | 0.5380584 | 1           |
| GO:0006097_glyoxylate_cycle                                                    | 12  | 12  | 0.3546741 | 1           |
| GO:0006098_pentose_phosphate_shunt                                             | 20  | 20  | 0.0055311 | 1           |
| GO:0006144_purine_base_metabolic_process                                       | 26  | 26  | 0.2918548 | 1           |

|                                                                 |    |    |           |   |
|-----------------------------------------------------------------|----|----|-----------|---|
| GO:0006166_purine_ribonucleoside_salvage                        | 20 | 20 | 0.3340227 | 1 |
| GO:0006189_'de_novo'_IMP_biosynthetic_process                   | 12 | 12 | 0.0111086 | 1 |
| GO:0006206_pyrimidine_base_metabolic_process                    | 10 | 10 | 0.4437051 | 1 |
| GO:0006207_'de_novo'_pyrimidine_base_biosynthetic_process       | 16 | 16 | 0.1660282 | 1 |
| GO:0006265_DNA_topological_change                               | 14 | 9  | 0.6651635 | 1 |
| GO:0006268_DNA_unwinding_during_replication                     | 14 | 12 | 0.5020404 | 1 |
| GO:0006284_base_excision_repair                                 | 14 | 14 | 0.1514773 | 1 |
| GO:0006289_nucleotide_excision_repair                           | 10 | 10 | 0.8813046 | 1 |
| GO:0006304_DNA_modification                                     | 16 | 13 | 0.8905482 | 1 |
| GO:0006352_transcription_initiation                             | 14 | 11 | 0.2238595 | 1 |
| GO:0006400_tRNA_modification                                    | 18 | 15 | 0.1293019 | 1 |
| GO:0006415_translational_termination                            | 12 | 10 | 0.0060762 | 1 |
| GO:0006464_protein_modification_process                         | 16 | 15 | 0.041521  | 1 |
| GO:0006520_amino_acid_metabolic_process                         | 58 | 56 | 0.0116676 | 1 |
| GO:0006525_arginine_metabolic_process                           | 22 | 22 | 0.1209013 | 1 |
| GO:0006537_glutamate_biosynthetic_process                       | 10 | 10 | 0.3205155 | 1 |
| GO:0006629_lipid_metabolic_process                              | 40 | 40 | 0.177716  | 1 |
| GO:0006631_fatty_acid_metabolic_process                         | 28 | 28 | 0.8794461 | 1 |
| GO:0006730_one_carbon_compound_metabolic_process                | 14 | 7  | 0.4194816 | 1 |
| GO:0006744_ubiquinone_biosynthetic_process                      | 18 | 13 | 0.1155871 | 1 |
| GO:0006777_Mo_molybdopterin_cofactor_biosynthetic_process       | 24 | 24 | 0.9893172 | 1 |
| GO:0006800_oxygen_and_reactive_oxygen_species_metabolic_process | 10 | 10 | 0.2382541 | 1 |
| GO:0006812_cation_transport                                     | 20 | 20 | 0.7347118 | 1 |
| GO:0006813_potassium_ion_transport                              | 38 | 38 | 0.3712255 | 1 |
| GO:0006814_sodium_ion_transport                                 | 42 | 40 | 0.721563  | 1 |
| GO:0006817_phosphate_transport                                  | 20 | 20 | 0.6321509 | 1 |
| GO:0006829_zinc_ion_transport                                   | 12 | 10 | 0.8153652 | 1 |
| GO:0006835_dicarboxylic_acid_transport                          | 16 | 16 | 0.731124  | 1 |
| GO:0006855_multidrug_transport                                  | 12 | 12 | 0.0798067 | 1 |
| GO:0006857_oligopeptide_transport                               | 50 | 50 | 0.0307388 | 1 |
| GO:0006885_regulation_of_pH                                     | 12 | 12 | 0.792748  | 1 |
| GO:0007600_sensory_perception                                   | 10 | 10 | 0.8784042 | 1 |
| GO:0008272_sulfate_transport                                    | 18 | 18 | 0.9923699 | 1 |
| GO:0008295_spermidine_biosynthetic_process                      | 12 | 12 | 0.8866595 | 1 |
| GO:0008360_regulation_of_cell_shape                             | 72 | 44 | 0.2203232 | 1 |

|                                                                          |     |     |           |   |
|--------------------------------------------------------------------------|-----|-----|-----------|---|
| GO:0008654_phospholipid_biosynthetic_process                             | 30  | 17  | 0.0130064 | 1 |
| GO:0009082_branched_chain_family_amino_acid_biosynthetic_process         | 36  | 36  | 0.6580187 | 1 |
| GO:0009086_methionine_biosynthetic_process                               | 22  | 20  | 0.0416809 | 1 |
| GO:0009098_leucine_biosynthetic_process                                  | 10  | 10  | 0.9916351 | 1 |
| GO:0009102_biotin_biosynthetic_process                                   | 16  | 16  | 0.6654095 | 1 |
| GO:0009117_nucleotide_metabolic_process                                  | 16  | 15  | 0.6190599 | 1 |
| GO:0009165_nucleotide_biosynthetic_process                               | 10  | 6   | 0.260275  | 1 |
| GO:0009166_nucleotide_catabolic_process                                  | 10  | 10  | 0.8985847 | 1 |
| GO:0009228_thiamin_biosynthetic_process                                  | 22  | 19  | 0.5530635 | 1 |
| GO:0009234_menaquinone_biosynthetic_process                              | 14  | 14  | 0.7235073 | 1 |
| GO:0009239_enterobactin_biosynthetic_process                             | 12  | 9   | 0.8624097 | 1 |
| GO:0009244_lipopolysaccharide_core_region_biosynthetic_process           | 12  | 12  | 0.2458971 | 1 |
| GO:0009252_peptidoglycan_biosynthetic_process                            | 64  | 44  | 0.2200835 | 1 |
| GO:0009253_peptidoglycan_catabolic_process                               | 20  | 20  | 0.6590683 | 1 |
| GO:0009273_peptidoglycan_based_cell_wall_biogenesis                      | 18  | 10  | 0.7536709 | 1 |
| GO:0009296_flagellum_assembly                                            | 16  | 16  | 0.9959053 | 1 |
| GO:0009307_DNA_restriction_modification_system                           | 18  | 18  | 0.9434945 | 1 |
| GO:0009396_folic_acid_and_derivative_biosynthetic_process                | 14  | 9   | 0.9823931 | 1 |
| GO:0009401_phosphoenolpyruvate_dependent_sugar_phosphotransferase_system | 116 | 113 | 0.2305194 | 1 |
| GO:0009405_pathogenesis                                                  | 18  | 16  | 0.3237603 | 1 |
| GO:0009432_SOS_response                                                  | 34  | 32  | 0.050303  | 1 |
| GO:0009435_NAD_biosynthetic_process                                      | 12  | 9   | 0.0069033 | 1 |
| GO:0015628_protein_secretion_by_the_type_II_secretion_system             | 24  | 20  | 0.4917391 | 1 |
| GO:0015675_nickel_ion_transport                                          | 10  | 10  | 0.0499581 | 1 |
| GO:0015716_phosphonate_transport                                         | 30  | 30  | 0.2849391 | 1 |
| GO:0015725_gluconate_transport                                           | 14  | 14  | 0.0823007 | 1 |
| GO:0016042_lipid_catabolic_process                                       | 12  | 12  | 0.3087273 | 1 |
| GO:0016051_carbohydrate_biosynthetic_process                             | 10  | 9   | 0.0070238 | 1 |
| GO:0016226_iron_sulfur_cluster_assembly                                  | 18  | 17  | 0.0832667 | 1 |
| GO:0016998_cell_wall_catabolic_process                                   | 32  | 32  | 0.0289036 | 1 |
| GO:0019299_rhamnose_metabolic_process                                    | 10  | 4   | 0.1087148 | 1 |
| GO:0019363_pyridine_nucleotide_biosynthetic_process                      | 14  | 12  | 0.0469994 | 1 |
| GO:0019402_galactitol_metabolic_process                                  | 14  | 12  | 0.7441308 | 1 |
| GO:0019521_D_gluconate_metabolic_process                                 | 20  | 20  | 0.0948454 | 1 |
| GO:0019538_protein_metabolic_process                                     | 14  | 14  | 0.3926911 | 1 |

|                                                               |    |    |           |   |
|---------------------------------------------------------------|----|----|-----------|---|
| GO:0019544_arginine_catabolic_process_to_glutamate            | 10 | 10 | 0.1797869 | 1 |
| GO:0019835_cytolysis                                          | 20 | 20 | 0.6209913 | 1 |
| GO:0019877_diaminopimelate_biosynthetic_process               | 14 | 4  | 0.5122409 | 1 |
| GO:0030001_metal_ion_transport                                | 12 | 10 | 0.9776441 | 1 |
| GO:0032259_methylation                                        | 18 | 18 | 0.0194151 | 1 |
| GO:0033014_tetrapyrrole_biosynthetic_process                  | 10 | 0  | 1         | 1 |
| GO:0045333_cellular_respiration                               | 12 | 12 | 0.6431614 | 1 |
| GO:0045892_negative_regulation_of_transcription_DNA_dependent | 16 | 15 | 0.5132493 | 1 |
| GO:0045893_positive_regulation_of_transcription_DNA_dependent | 10 | 10 | 0.0641351 | 1 |
| GO:0046656_folic_acid_biosynthetic_process                    | 14 | 11 | 0.7971055 | 1 |
| GO:0046685_response_to_arsenic                                | 10 | 10 | 0.7991    | 1 |
| GO:0065002_intracellular_protein_transmembrane_transport      | 22 | 13 | 0.0836465 | 1 |

<sup>a</sup> GO categories were downloaded from EMBL-EBI (<http://www.ebi.ac.uk/>). Gene set enrichment analysis was performed on the GO terms as per the method described previously [1]. GO categories with q-value  $\leq 0.05$  from the enrichment analysis is considered as significant (see [Protocol S4](#) for details).

<sup>b</sup> Number of genes in the GO category considered for the enrichment analysis.

<sup>c</sup> Number of genes matching the GO category.

<sup>d</sup> The enrichment  $P$  value is calculated based on the normal distribution.

<sup>e</sup> The  $Q$  value is generated by adjusting the  $P$  value using Benjamini and Hochberg correction procedure [2].

**Note:** Genes in each GO category used in the enrichment analysis and number of genes from our study matching the GO category is shown in Table S5-Sheet 2.

### Reference

1. Rafael A. Irizarry, Chi Wang, Yun Zhou, and Terence P. Speed, "GENE SET ENRICHMENT ANALYSIS MADE SIMPLE" (April 2009). Johns Hopkins University, Dept. of Biostatistics Working Papers. Working Paper 185.
2. Benjamini Y, Hochberg Y: Controlling the false discovery rate- a practical and powerful approach to multiple testing. JR Stat Soc Ser 1995, B57:289-300.

**Table S5.** Bacterial Strains used in this Study

| Bacterial strains                                  | Genotype                                                                                                                                | Source or Reference                 |
|----------------------------------------------------|-----------------------------------------------------------------------------------------------------------------------------------------|-------------------------------------|
| Wild-type, K-12 BW25113                            | $\Delta(araD-araB)567$ ,<br>$\Delta lacZ4787 (::rrnB-3)$ ,<br>lambda-, <i>rph-1</i> , $\Delta(rhaD-$<br><i>rhaB)568, <i>hsdR514</i></i> | Keio collection                     |
| DY330                                              | $\Delta lacU169 gal490 \lambda cl^{857}$<br>$\Delta(cro-bioA)$                                                                          | Yu et al., 2000                     |
| Hfr-C                                              | Hfr Cavalli                                                                                                                             | <i>E. coli</i> genetic stock centre |
| BL21(DE3)                                          | [ <i>E. coli</i> F <sup>-</sup> <i>ompT hsdS<sub>B</sub></i> (r)]                                                                       | Invitrogen                          |
| <i>ygbT</i> $\Delta::Kan^a$                        | F BW25113                                                                                                                               | Keio collection                     |
| <i>ruvA</i> $\Delta::Kan$                          | F BW25113                                                                                                                               | Keio collection                     |
| <i>ruvB</i> $\Delta::Kan$                          | F BW25113                                                                                                                               | Keio collection                     |
| <i>ruvC</i> $\Delta::Kan$                          | F BW25113                                                                                                                               | Keio collection                     |
| <i>recN</i> $\Delta::Kan$                          | F BW25113                                                                                                                               | Keio collection                     |
| <i>recF</i> $\Delta::Kan$                          | F BW25113                                                                                                                               | Keio collection                     |
| <i>recO</i> $\Delta::Kan$                          | F BW25113                                                                                                                               | Keio collection                     |
| <i>recA</i> $\Delta::Kan$                          | F BW25113                                                                                                                               | Keio collection                     |
| <i>recB</i> $\Delta::Kan$                          | F BW25113                                                                                                                               | Keio collection                     |
| <i>recC</i> $\Delta::Kan$                          | F BW25113                                                                                                                               | Keio collection                     |
| <i>recD</i> $\Delta::Kan$                          | F BW25113                                                                                                                               | Keio collection                     |
| <i>aas</i> $\Delta::Kan$                           | F BW25113                                                                                                                               | Keio collection                     |
| <i>exo</i> $\Delta::Kan$                           | F BW25113                                                                                                                               | Keio collection                     |
| <i>ascB</i> $\Delta::Kan$                          | F BW25113                                                                                                                               | Keio collection                     |
| <i>proV</i> $\Delta::Kan$                          | F BW25113                                                                                                                               | Keio collection                     |
| <i>yecT</i> $\Delta::Kan$                          | F BW25113                                                                                                                               | Keio collection                     |
| <i>yobB</i> $\Delta::Kan$                          | F BW25113                                                                                                                               | Keio collection                     |
| <i>ygbT</i> $\Delta::Cm^b$                         | Hfr Cavalli with $\lambda$ Red                                                                                                          | This study                          |
| <i>ruvA</i> $\Delta::Cm$                           | Hfr Cavalli with $\lambda$ Red                                                                                                          | This study                          |
| <i>ruvB</i> $\Delta::Cm$                           | Hfr Cavalli with $\lambda$ Red                                                                                                          | This study                          |
| <i>ruvC</i> $\Delta::Cm$                           | Hfr Cavalli with $\lambda$ Red                                                                                                          | This study                          |
| <i>recA</i> $\Delta::Cm$                           | Hfr Cavalli with $\lambda$ Red                                                                                                          | This study                          |
| <i>recB</i> $\Delta::Cm$                           | Hfr Cavalli with $\lambda$ Red                                                                                                          | This study                          |
| <i>recC</i> $\Delta::Cm$                           | Hfr Cavalli with $\lambda$ Red                                                                                                          | This study                          |
| <i>recD</i> $\Delta::Cm$                           | Hfr Cavalli with $\lambda$ Red                                                                                                          | This study                          |
| <i>csdA</i> $\Delta::Cm$                           | Hfr Cavalli with $\lambda$ Red                                                                                                          | This study                          |
| <i>rpoS</i> $\Delta::Cm$                           | Hfr Cavalli with $\lambda$ Red                                                                                                          | This study                          |
| C-terminal YgbT-SPA <sup>c</sup>                   | DY330 with $\lambda$ Red                                                                                                                | This study                          |
| C-terminal RuvB-SPA                                | DY330 with $\lambda$ Red                                                                                                                | This study                          |
| C-terminal RecB-SPA                                | DY330 with $\lambda$ Red                                                                                                                | This study                          |
| C-terminal RecC-SPA                                | DY330 with $\lambda$ Red                                                                                                                | This study                          |
| C-terminal UvrC-SPA                                | DY330 with $\lambda$ Red                                                                                                                | This study                          |
| C-terminal YgcH-SPA                                | DY330 with $\lambda$ Red                                                                                                                | This study                          |
| C-terminal YgcJ-SPA                                | DY330 with $\lambda$ Red                                                                                                                | This study                          |
| C-terminal YchM-SPA                                | DY330 with $\lambda$ Red                                                                                                                | This study                          |
| <i>ygbT</i> $\Delta::Cm$ <i>ruvC</i> $\Delta::Kan$ | F BW25113 with $\lambda$ Red                                                                                                            | This study                          |
| <i>ygbT</i> $\Delta::Cm$ <i>ruvB</i> $\Delta::Kan$ | F BW25113 with $\lambda$ Red                                                                                                            | This study                          |
| <i>ygbT</i> $\Delta::Cm$ <i>ruvA</i> $\Delta::Kan$ | F BW25113 with $\lambda$ Red                                                                                                            | This study                          |

|                                                                                                  |                                   |            |
|--------------------------------------------------------------------------------------------------|-----------------------------------|------------|
| <i>ygbT</i> Δ:: <i>Cm recN</i> Δ:: <i>Kan</i>                                                    | F <sup>-</sup> BW25113 with λ Red | This study |
| <i>ygbT</i> Δ:: <i>Cm recO</i> Δ:: <i>Kan</i>                                                    | F <sup>-</sup> BW25113 with λ Red | This study |
| <i>ygbT</i> Δ:: <i>Cm recF</i> Δ:: <i>Kan</i>                                                    | F <sup>-</sup> BW25113 with λ Red | This study |
| CRISPR cluster-I Δ:: <i>Cm</i>                                                                   | Hfr Cavalli with λ Red            | This study |
| CRISPR cluster-I Δ:: <i>Kan</i>                                                                  | Hfr Cavalli with λ Red            | This study |
| CRISPR cluster-II Δ:: <i>Cm</i>                                                                  | Hfr Cavalli with λ Red            | This study |
| CRISPR cluster-I Δ:: <i>Kan</i> and CRISPR cluster-II Δ:: <i>Cm</i>                              | Hfr Cavalli with λ Red            | This study |
| CRISPR cluster-I Δ <i>ygbT</i> Δ:: <i>Cm</i>                                                     | Hfr Cavalli with λ Red            | This study |
| CRISPR cluster-II Δ:: <i>Cm ygbT</i> Δ:: <i>Kan</i>                                              | Hfr Cavalli with λ Red            | This study |
| CRISPR cluster-I Δ:: <i>Kan</i> CRISPR cluster-II Δ:: <i>Cm ygbT</i> Δ:: <i>Tet</i> <sup>d</sup> | Hfr Cavalli with λ Red            | This study |
| CRISPR cluster-I Δ:: <i>Kan</i> CRISPR cluster-II Δ:: <i>Tet YgbT</i> -YFP                       | Hfr Cavalli and DY330             | This study |
| <i>YgbT</i> -YFP                                                                                 | DY330 with λ Red                  | This study |
| <i>RuvC</i> -YFP                                                                                 | DY330 with λ Red                  | This study |
| <i>RuvB</i> -YFP                                                                                 | DY330 with λ Red                  | This study |
| <i>RuvA</i> -YFP                                                                                 | DY330 with λ Red                  | This study |
| <i>RecN</i> -YFP                                                                                 | DY330 with λ Red                  | This study |
| <i>MutH</i> -YFP                                                                                 | DY330 with λ Red                  | This study |
| <i>ygbT</i> Δ/pBAD <i>ygbT</i> <sup>+</sup>                                                      | pBAD24 vector                     | This study |
| <i>ygbT</i> Δ [pBAD vector]                                                                      | pBAD24 vector                     | This study |
| <i>ygbT</i> Δ <i>ruvA</i> Δ /pBAD <i>ygbT ruvA</i> <sup>+</sup>                                  | pBAD24 vector                     | This study |
| <i>ygbT</i> Δ <i>ruvB</i> Δ /pBAD <i>ygbT ruvB</i> <sup>+</sup>                                  | pBAD24 vector                     | This study |
| <i>ygbT</i> Δ <i>ruvC</i> Δ /pBAD <i>ygbT ruvC</i> <sup>+</sup>                                  | pBAD24 vector                     | This study |
| <i>ygbT</i> Δ <i>ruvA</i> Δ [pBAD vector]                                                        | pBAD24 vector                     | This study |
| <i>ygbT</i> Δ <i>ruvB</i> Δ [pBAD vector]                                                        | pBAD24 vector                     | This study |
| <i>ygbT</i> Δ <i>ruvC</i> Δ [pBAD vector]                                                        | pBAD24 vector                     | This study |
| <i>ygbT</i> Δ/pBAD D218A                                                                         | pBAD24 vector                     | This study |
| <i>ygbT</i> Δ/pBAD E141A                                                                         | pBAD24 vector                     | This study |
| <i>ygbT</i> Δ/pBAD H208A                                                                         | pBAD24 vector                     | This study |

<sup>a</sup>Kan, Kanamycin resistance cassette

<sup>b</sup>Cm, Chloramphenicol resistance cassette

<sup>c</sup>SPA, Sequential Peptide Affinity

<sup>d</sup>Tet, Tetracycline resistance cassette

**Note:** When required we obtained the single non-essential gene deletion strains from the Keio [1] stock collection library marked with Kanamycin resistance cassette.

#### References:

1. Baba, T. et al. Construction of *Escherichia coli* K-12 in-frame, single-gene knockout mutants: the Keio collection. *Mol. Syst. Biol.* 2, 2006.0008 (2006).
2. Yu, D. et al. (2000) An efficient recombination system for chromosome engineering in *Escherichia coli*. *PNAS* 97, 5978-5983.

**Supplemental Table 6.** Crystallographic data collection and model refinement statistics

| <b>Data collection statistics</b>    | <b>YgbT<br/>C-terminal domain<br/>(aa 92-281)</b> | <b>YgbT<br/>full-length<br/>(aa 7-281)</b>    |
|--------------------------------------|---------------------------------------------------|-----------------------------------------------|
| space group                          | P2 <sub>1</sub> 2 <sub>1</sub> 2 <sub>1</sub>     | P2 <sub>1</sub> 2 <sub>1</sub> 2 <sub>1</sub> |
| unit cell (Å)                        | a= 53.7 Å, b =90.0 Å<br>c = 121.9 Å               | a = 78.7 Å, b =79.3 Å<br>c = 101.5 Å          |
| wavelength (Å)                       | 0.9794                                            | 0.9794                                        |
| resolution (Å)                       | 40-1.40                                           | 35-1.95                                       |
| number of observed reflections       | 557335                                            | 448281                                        |
| number of unique reflections         | 115817                                            | 46873                                         |
| $R_{\text{merge}}^a$ (%)             | 6.5 (64.0)                                        | 9.5(55.3)                                     |
| completeness (%)                     | 99.0 (99.6.)                                      | 99.6 (100)                                    |
| $I/\sigma$                           | 27.0 (2.6)                                        | 25.9 (4.0)                                    |
| <b>Phasing method</b>                | <b>SAD</b>                                        | <b>MR (Phaser)</b>                            |
| <b>Refinement statistics</b>         |                                                   |                                               |
| resolution range (Å)                 | 40.0-1.40                                         | 35.0-1.95                                     |
| $R_{\text{cryst}}$ (%)               | 17.7                                              | 21.1                                          |
| $R_{\text{free}}$ (%)                | 20.0                                              | 25.8                                          |
| number of protein molecules/residues | 3/542                                             | 2/520                                         |
| solvent                              | 793                                               | 274                                           |
| SO4/SO3/Et.glycol                    | 5/2/4                                             | -/-/-                                         |
| <b>Rmsd from target values</b>       |                                                   |                                               |
| bond lengths (Å)                     | 0.015                                             | 0.022                                         |
| bond angles (deg)                    | 1.59                                              | 1.87                                          |
| protein main chain                   | 8.0                                               | 19.6                                          |

|                                                              |                     |              |
|--------------------------------------------------------------|---------------------|--------------|
| protein side chain                                           | 10.8                | 23.3         |
| H <sub>2</sub> O/SO <sub>4</sub> /SO <sub>3</sub> /Et.glycol | 22.3/26.1/30.8/28.6 | 26.9/-/-     |
| <b>Ramachandran Plot (%)</b><br>favored/allowed/disallowed   | 94.8/5.2/-/-        | 93.9/6.1/-/- |
| <b>PDB code</b>                                              | 3NKE                | 3NKD         |



## Supplementary Materials

### **A dual function of the CRISPR-Cas system in bacterial antiviral immunity and DNA repair**

Mohan Babu<sup>1,♦</sup>, Natalia Beloglazova<sup>1,♦</sup>, Robert Flick<sup>1</sup>, Chris Graham<sup>1</sup>, Tatiana Skarina<sup>1</sup>, Boguslaw Nocek<sup>2</sup>, Alla Gagarinova<sup>1</sup>, Oxana Pogoutse<sup>1</sup>, Greg Brown<sup>1</sup>, Andrew Binkowski<sup>2</sup>, Sadhna Phanse<sup>1</sup>, Andrzej Joachimiak<sup>2</sup>, Eugene V. Koonin<sup>3</sup>, Alexei Savchenko<sup>1</sup>, Andrew Emili<sup>1,4,\*</sup>, Jack Greenblatt<sup>1,4,\*</sup>, Aled M. Edwards<sup>1,2,4,5,\*</sup>, and Alexander F. Yakunin<sup>1,\*</sup>

#### **1. Supplementary Text**

##### ***Analysis of Genetic Interactions from the ygbTA Genome-Wide Genetic Screen in E. coli***

Recently, we (Butland et al., 2008) and others (Typas et al., 2008) have exploited the natural bacterial conjugation and genetic transfer capacity of Hfr strains with the Keio (Baba et al., 2006) single gene deletion collection as the basis of a high-throughput method for examining genetic interactions in a genome-wide manner in *E. coli*. To the Keio collection, we also added 149 F<sup>-</sup> potentially-hypomorphic Kan<sup>R</sup>-marked strains with C-terminal SPA (Sequential Peptide Affinity) - tagged essential genes involved in conserved bacterial processes (Butland et al., 2005), signifying that the tag does not markedly preclude protein folding or function *per se*. We reasoned that alteration of the 3'-UTR via integration of the marker cassette could destabilize certain transcripts or, on rare occasion, impede the proper function of the fusion protein. Using this assay, we have

screened an Hfr *ygbT* deletion mutant as a donor strain and crossed against all the *E. coli* genes (Supplementary Table S4).

The relative fitness of the *ygbT* double mutants produced by conjugation is digitally imaged, colony growth quantified and an interaction score (*S*) is calculated to quantify the strength and confidence of genetic interaction for each *E. coli* mutant gene pair (Supplementary Table S4). Fitness defects in *E. coli* (Butland et al., 2008) are inferred as a function of normalized growth rates relative to unperturbed growth corresponding to single gene mutant references. The expectation is that, the growth rate of a double mutant bearing two functionally unrelated genes should be approximately multiplicative in comparison with the two single mutants alone. An aggravating functional genetic relationship is conveyed by the non-additive slow growth or inviability of the double mutants relative to the expected summation of single deletion growth phenotypes, implying the genes are in related pathways that converge on a common cellular process or function. Conversely, less than additive growth defects indicate an alleviating interaction, suggesting that the two genes in question belong to the same biological pathway (i.e. component subunits of a protein complex).

### ***Gene Set Enrichment Analysis on the Genetic Interaction Scores from the ygbTA Genome-Wide Genetic Screen***

Rather than choosing a pre-arbitrary interaction score (*S*) threshold cut-off from the *ygbTΔ::Cm<sup>R</sup>* genome-wide genetic screen, we ranked the mutant gene pairs based on their interaction *S* scores (Supplementary Table S4) and identified the enrichment for Gene Ontology (GO) terms spanning various biological processes using the Gene Set

Enrichment Analysis (Irizarry et al., 2009) (Supplementary Table S5). We analyzed the two independent isolate strains (Isolate 1 and Isolate 2) of the same gene simultaneously, that is, for a given gene, say G, we treated them as G\_A and G\_B, respectively. We then evaluated the enrichment of GO terms using a standardized  $\chi^2$ -test that will allow us to compare gene sets of different sizes and different mean shifts (Irizarry et al., 2009).

$$E_g^{\chi^2} = \frac{\sum_{i \in A_g} (S_i - \bar{S})^2 - (N_g - 1)}{2 * (N_g - 1)}$$

In the above formula,  $S_i$  is the  $S$  score for gene  $i$  in gene set  $A_g$ ,  $\bar{S}$  is the mean  $S$  score of gene set  $A_g$ .  $N_g$  is the number of genes in  $A_g$ , when  $N_g$  is larger than 20,  $E_g^{\chi^2}$  follows a standard normal distribution. The enrichment  $P$  value of  $E_g^{\chi^2}$  is calculated based on the distribution. The calculated  $P$ -value is further adjusted using the Benjamini and Hochberg correction procedure (Benjamini and Hochberg, 1995) to determine a  $q$ -value. GO category with  $q$ -value  $\leq 0.05$  is considered to be significant. The result of this analysis is shown in Supplementary Table S5.

Of the 182 GO categories considered for GSEA, 76 GO categories from *ygbT* genetic screen with a corrected  $q$ -value below the cut-off ( $q$ -value  $\leq 0.05$ ) showed enrichment for several major functional processes including GO terms related to DNA repair ( $q$ -value  $< 0.002$ ), DNA recombination ( $q$ -value  $< 2.79E-09$ ), and chromosomal segregation and condensation ( $q$ -value  $< 0$ ) (Supplementary Table S5).

## 2. Supplementary Methods

*Bacterial strains, gene cloning, protein purification, and mutagenesis*

Single gene deletion strains were from the Keio knock-out library (Baba et al., 2006). Hfr strains were constructed using  $\lambda$ -Red recombination (Butland et al., 2008). For complementation assays, genes were cloned from *E. coli* genomic DNA using ligation-dependent cloning into the pBAD24 vector (from Jon Beckwith, Harvard Medical School, USA). Wild-type, mutant and truncated *ygbT* genes were cloned into the modified pET15b plasmid as previously described (Zhang et al., 2001). The proteins were expressed as a fusion with an N-terminal His<sub>6</sub>-tag in *E. coli* and purified to more than 95% homogeneity using metal-chelate affinity chromatography on nickel affinity resin and gel filtration on a Superdex 200 26/60 column (Amersham Biosciences) as described previously (Suppl. Fig. 1G) (Proudfoot et al., 2008; Zhang et al., 2001). Site-directed mutagenesis of YgbT was performed using a protocol based on the QuikChange site-directed mutagenesis kit (Stratagene).

### ***In Vitro Nuclease Assays with Linear Substrates***

The single-stranded RNA and DNA substrates (Supplementary Table S1) were purchased from IDT (USA). The reaction mixtures for DNase assays (10  $\mu$ l) contained 0.1  $\mu$ M 5' - [<sup>32</sup>P]-labeled ssDNA, 50 mM Tris-HCl (pH 9.0), 100 mM KCl, 10 mM MgCl<sub>2</sub>, 1 mM dithiothreitol, 0.25  $\mu$ g of YgbT. The reaction mixture was incubated at 37 °C for the indicated period of time and quenched by adding equal volume of formamide loading buffer, resolved by electrophoresis in 15% polyacrylamide/8M urea gels and visualized by autoradiography. The reaction mixture for RNase assays (10  $\mu$ l) contained 0.1  $\mu$ M 5' - [<sup>32</sup>P]-labeled ssRNA, 50 mM Tris-HCl (pH 6.0), 100 mM KCl, 5 mM MgCl<sub>2</sub>, 1 mM DTT and YgbT (100  $\mu$ g/ml). The reaction mixtures were incubated at 37 °C for 45 min and quenched by the addition of an equal volume of formamide loading buffer (80%

formamide, 0.025% bromophenol blue, 0.025% xylene cyanol, and 10mM EDTA pH 8.0). The reaction products were resolved by electrophoresis in 15% PAA/8M urea gels using TBE (10mM Tris-borate, pH 8.3 and 2mM EDTA) as a running buffer and visualized by autoradiography.

### ***Preparation of Branched DNA substrates***

The oligonucleotides were 5'-end labeled with [ $\gamma$ - $^{32}$ P] ATP (6000 Ci/mmol; Amersham) and T4 Polynucleotide kinase (PNK) (Fermentas) and then purified by denaturing PAGE (15% polyacrylamide/8M urea gel). The labeled oligonucleotides were eluted from the gel, precipitated with 2% LiClO<sub>4</sub> in acetone, washed with acetone, dried, and dissolved in DEPC-treated Milli-Q water. The synthetic HJ1 was made by annealing oligonucleotides 1, 2, 3 and 4 (Supplementary Table S1). The HJ2 contained oligonucleotides 5, 6, 7 and 8. The HJ3 contained oligonucleotides 9, 10, 11 and 12. The three-way junction 3wHJ was constructed from oligonucleotides 5, 6, and 7. The Y-junction YJ contained oligonucleotides 13, 14 and 15. The heterologous loop HL was generated by annealing oligonucleotides 16 and 17. The HJ4 contained oligonucleotides 18, 19, 20 and 21. The asymmetrical HJ5 contained oligonucleotides 18, 19, 22 and 23. The replication fork RF contained oligonucleotides 18, 23, 24 and 25. The 5'-flap (5'F) contained oligonucleotides 18, 21 and 24. The 3'-flap (3'F) contained oligonucleotides 18, 21, and 25. The splayed arm substrate was prepared by annealing oligonucleotides 18 and 21. The cruciform-like substrates CF1 and CF2 were generated by annealing oligonucleotides 26 and 27 (CF1) or oligonucleotides 28 and 29 (CF2) (Supplementary Table S1).

### ***Nuclease assays with branched DNA substrates***

All DNA or RNA substrates were 5'-end labeled with [ $\gamma$ - $^{32}$ P] ATP and T4 Polynucleotide kinase (PNK) and purified by denaturing polyacrylamide gel electrophoresis (PAGE) (15% polyacrylamide/8M urea gel). Reaction mixtures for branched DNA cleavage assays contained [ $5'$ - $^{32}$ P]-labeled substrate (20 nM), 50 mM Tris-HCl (pH 8.5 or 7.0), 100 mM KCl, 10 mM MgCl<sub>2</sub>, 1mM DTT, and YgbT (100  $\mu$ g/ml) or RuvC (50  $\mu$ g/ml). For non-denaturing PAGE, the reactions were stopped by the addition of loading buffer (10% glycerol, 0.025% bromophenol blue, 0.025% xylene cyanol, and 10 mM EDTA pH 8.0, 1% SDS), and the products were resolved on an 8% polyacrylamide gel. For denaturing PAGE analysis, reactions were quenched by the addition of an equal volume of formamide loading buffer (80% formamide, 0.025% bromophenol blue, 0.025% xylene cyanol, and 10 mM EDTA pH 8.0). The reaction products were resolved by electrophoresis in 15% polyacrylamide/8M urea gels using TBE (10 mM Tris-borate, pH 8.3 and 2 mM EDTA) as a running buffer. In the re-ligation experiments with T4 DNA ligase, the asymmetrical HJ5 was constructed by annealing oligonucleotides 18, 21, 22 and 23. YgbT (or RuvC) and HJ5 labeled on strand 3 were incubated using conditions described above for the HJ resolution assay. Reaction products were precipitated by 2% LiClO<sub>4</sub> in acetone, dissolved in the reaction buffer (40 mM Tris-HCl, pH 7.8, 10 mM MgCl<sub>2</sub>, 10 mM DTT, 0.5 mM ATP), and incubated with T4 DNA ligase (100 units) at 37 °C for 2 h.

### ***Crystallization and structure determination***

Se-Met-substituted crystals of the YgbT C-terminal domain (aa 92 – 281) were grown by the hanging drop vapor diffusion method against a crystallization buffer containing 50 mM MES (pH 6.5), 20% PEG 8K, 10 mM MgCl<sub>2</sub>, 10 mM adenylyl-imidodiphosphate,

0.2 M ammonium sulfate, and 0.3 M non-detergent sulfobetaine (NDSB)-211, whereas the crystals of the native two-domain YgbT fragment (7 – 281) were grown against a crystallization buffer containing 0.1 M Bis-Tris-HCl (pH 7.5), 0.1 M Na-formate, 0.1 M Li-sulfate, and 0.3 M NDSB-11 at 18°C. Diffraction data were collected using the SBC-Collect program at the selenium absorption edge (12.6603 keV) to 1.40 Å (C-terminal domain) or 1.95 Å (full-length YgbT) on the 19-ID beamline of the Structural Biology Center at the Advanced Photon Source (Rosenbaum et al., 2006). Data were integrated and scaled using the HKL3000 software package, and the structure of the YgbT C-terminal domain was determined using the single anomalous scattering dispersion (SAD) method (Supplementary Table S3). The initial protein model was built using the HKL3000 software package (Minor et al., 2006) and the final model was obtained using COOT (Emsley and Cowtan, 2004; Murshudov et al., 1997). The structure of the two-domain YgbT was determined by molecular replacement using the structure of the YgbT C-terminal domain as a model. Molecular replacement searches were completed with Phaser using the CCP4 suite (Collaborative Computational Project, 1994; McCoy et al., 2007), and the initial model was obtained using COOT and ARP/wARP (Morris et al., 2003). The final model was refined using REFMAC 5.5. The final round of refinement was carried out using TLS refinement and TLS operators were calculated using the TLSMD server (Painter and Merritt, 2006). The quality of the structures was checked using the validation tools of COOT and Molprobity (Davis et al., 2007) and all residues were within acceptable regions of the Ramachandran plot (Supplementary Table S2).

### ***Immunoprecipitation***

In co-immunoprecipitation assays, the *E. coli* cell lysates (~5 mg) from strains expressing SPA-tagged YgbT, RecB and RecC were incubated for 2 hr at 4°C with anti-Flag M2 agarose beads, which bind the FLAG epitopes of the SPA-tag. The immunoprecipitated proteins were separated on 12 % SDS/PAGE and transferred onto nitrocellulose membranes as previously described (Babu et al., 2009). The membranes were probed with anti-RecB and anti-RecC (the kind gift from Andrew Taylor and Gerry Smith, Fred Hutchinson Cancer Research Center, Seattle WA) and anti-RuvB (Santa Cruz Biotechnology, Inc.) monoclonal antibodies, and then visualized by chemiluminescence (Pierce).

The physical interaction of YgbT with YgcH and YgcJ was confirmed by co-immunoprecipitation experiments using the C41 (DE3) strain (a derivative of BL21 (DE3), [*E. coli* F<sup>-</sup> *ompT hsdS<sub>B</sub>* (*r<sub>B</sub><sup>-</sup> m<sub>B</sub><sup>-</sup>*) *gal dcm* (DE3)] expressing a chromosomal SPA-tagged (C-terminal) YgbT or Fis (a nucleoids DNA-binding protein) prepared as previously described (Babu et al., 2009). We note that the commercial strain of *E. coli* BL21 (DE3) cells contain a CRISPR but do not contain YgbT or any other Cas genes.

The YgbT or Fis SPA-tagged protein expression was confirmed by Western blotting using anti-FLAG antibody that recognizes the FLAG epitopes of the SPA-tag. One µL of the pCA24N plasmid (harbors chloramphenicol selectable marker) expressing full length YgcH or YgcJ with N-terminal His<sub>6</sub>-tag (Kitagawa et al., 2005) was transformed into the C41 (DE3) strains with the SPA-tagged YgbT or Fis. The transformants were selected on kanamycin (50 µg/ml) and chloramphenicol (34 µg/ml). The overnight cultures of these *E. coli* C41 (DE3) strains were grown at 25 °C in 50 ml LB containing kanamycin and chloramphenicol to OD<sub>600</sub> = 0.5. The cells were



centrifuged at 4,000 *xg* and the pellets were resuspended in 50 ml of LB with appropriate antibiotics, followed by IPTG induction. The cells were induced for 3 h at 25 °C by the addition of 0.5 mM IPTG and harvested by centrifugation at 4,000 *xg*. Cells were then lysed via sonication as previously described (Babu et al., 2009). The sonicated cell lysates were incubated for 2 hr at 4°C with anti-Flag M2 agarose beads, which binds the FLAG epitopes of the SPA-tag. The immunoprecipitated proteins were separated on 10 % SDS/PAGE and transferred onto nitrocellulose membranes as previously described (Babu et al., 2009). The membranes were probed with anti-His monoclonal antibody (Upstate, cat#05949) and visualized by chemiluminescence (Pierce) to detect the presence of YgcH or YgcJ.

### 3. Supplementary Text and Methods References

- Baba, T., Ara, T., Hasegawa, M., Takai, Y., Okumura, Y., Baba, M., Datsenko, K.A., Tomita, M., Wanner, B.L. and Mori, H. (2006) Construction of Escherichia coli K-12 in-frame, single-gene knockout mutants: the Keio collection. *Mol Syst Biol.*, **2**, 2006.0008.
- Babu, M., Butland, G., Pogoutse, O., Li, J., Greenblatt, J.F. and Emili, A. (2009) Sequential Peptide Affinity Purification System for the Systematic Isolation and Identification of Protein Complexes from Escherichia coli. *Methods in Molecular Biology*, **564**, 373-400.
- Benjamini, Y. and Hochberg, Y. (1995) Controlling the false discovery rate- a practical and powerful approach to multiple testing. *JR Stat Soc Ser B***57**, 289-300.
- Butland, G., Babu, M., Díaz-Mejía, J.J., Bohdana, F., Phanse, S., Gold, B., Yang, W., Li, J., Gagarinova, A.G., Pogoutse, O., Mori, H., Wanner, B.L., Lo, H., Wasniewski, J., Christopoulos, C., Ali, M., Venn, P., Safavi-Naini, A., Sourour, N., Caron, S., Choi, J.Y., Laigle, L., Nazarians-Armavil, A., Deshpande, A., Joe, S., Datsenko, K.A., Yamamoto, N., Andrews, B.J., Boone, C., Ding, H., Sheikh, B., Moreno-Hagelseib, G., Greenblatt, J.F. and Emili, A. (2008) eSGA: E. coli synthetic genetic array analysis. *Nat Methods*, **5**, 789-795.
- Butland, G., Peregrín-Alvarez, J.M., Li, J., Yang, W., Yang, X., Canadien, V., Starostine, A., Richards, D., Beattie, B., Krogan, N., Davey, M., Parkinson, J., Greenblatt, J. and Emili, A. (2005) Interaction network containing conserved and essential protein complexes in Escherichia coli. *Nature* **433** 531–537.

- Collaborative Computational Project, N. (1994) The CCP4 suite: programs for protein crystallography. *Acta Crystallogr D Biol Crystallogr*, **50**, 760-763.
- Davis, I.W., Leaver-Fay, A., Chen, V.B., Block, J.N., Kapral, G.J., Wang, X., Murray, L.W., Arendall, W.B., 3rd, Snoeyink, J., Richardson, J.S. and Richardson, D.C. (2007) MolProbity: all-atom contacts and structure validation for proteins and nucleic acids. *Nucleic Acids Res*, **35**, W375-383.
- Emsley, P. and Cowtan, K. (2004) Coot: model-building tools for molecular graphics. *Acta Crystallogr D Biol Crystallogr*, **60**, 2126-2132.
- Irizarry, R.A., Wang, C., Zhou, Y. and Speed, T.P. (2009) Gene Set Enrichment Analysis Made Simple. *John Hopkins University, Dept. of Biostatistics Working Papers*, Working Paper 185.
- Kitagawa, M., Ara, T., Arifuzzaman, M., Ioka-Nakamichi, T., Inamoto, E., Toyonaga, H. and Mori, H. (2005) Complete set of ORF clones of Escherichia coli ASKA library (a complete set of E. coli K-12 ORF archive): unique resources for biological research. *DNA Res*, **12**, 291-299.
- McCoy, A.J., Grosse-Kunstleve, R.W., Adams, P.D., Winn, M.D., Storoni, L.C. and Read, R.J. (2007) Phaser crystallographic software. *J Appl Crystallogr*, **40**, 658-674.
- Minor, W., Cymborowski, M., Otwinowski, Z. and Chruszcz, M. (2006) HKL-3000: the integration of data reduction and structure solution--from diffraction images to an initial model in minutes. *Acta Crystallogr D Biol Crystallogr*, **62**, 859-866.
- Morris, R.J., Perrakis, A. and Lamzin, V.S. (2003) ARP/wARP and automatic interpretation of protein electron density maps. *Methods Enzymol*, **374**, 229-244.
- Murshudov, G.N., Vagin, A.A. and Dodson, E.J. (1997) Refinement of macromolecular structures by the maximum-likelihood method. *Acta Crystallogr D Biol Crystallogr*, **53**, 240-255.
- Painter, J. and Merritt, E.A. (2006) Optimal description of a protein structure in terms of multiple groups undergoing TLS motion. *Acta Crystallogr D Biol Crystallogr*, **62**, 439-450.
- Proudfoot, M., Sanders, S.A., Singer, A., Zhang, R., Brown, G., Binkowski, A., Xu, L., Lukin, J.A., Murzin, A.G., Joachimiak, A., Arrowsmith, C.H., Edwards, A.M., Savchenko, A.V. and Yakunin, A.F. (2008) Biochemical and structural characterization of a novel family of cystathionine beta-synthase domain proteins fused to a Zn ribbon-like domain. *J Mol Biol.*, **375**, 301-315.
- Rosenbaum, G., Alkire, R.W., Evans, G., Rotella, F.J., Lazarski, K., Zhang, R.G., Ginell, S.L., Duke, N., Naday, I., Lazarz, J., Molitsky, M.J., Keefe, L., Gonczy, J., Rock, L., Sanishvili, R., Walsh, M.A., Westbrook, E. and Joachimiak, A. (2006) The Structural Biology Center 19ID undulator beamline: facility specifications and protein crystallographic results. *J Synchrotron Radiat*, **13**, 30-45.
- Typas, A., Nichols, R.J., Siegele, D.A., Shales, M., Collins, S.R., Lim, B., Braberg, H., Yamamoto, N., Takeuchi, R., Wanner, B.L., Mori, H., Weissman, J.S., Krogan, N.J. and Gross, C.A. (2008) High-throughput, quantitative analyses of genetic interactions in E. coli. *Nat Methods*, **5**, 781-787.
- Zhang, R.G., Skarina, T., Katz, J.E., Beasley, S., Khachatryan, A., Vyas, S., Arrowsmith, C.H., Clarke, S., Edwards, A., Joachimiak, A. and Savchenko, A. (2001) Structure

of *Thermotoga maritima* stationary phase survival protein SurE: a novel acid phosphatase. *Structure*, **9**, 1095-1106.

## **4. SUPPLEMENTAL PROTOCOLS**

### **Protocol S1- YgbT association with proteins implicated in DNA repair and recombination.**

The YgbT, Ruv, Rec and three other CRISPR associated cascade complex subunits were chromosomally tagged as bait proteins and purified using the sequential peptide affinity purification protocol as described previously [4]. Identities of the co-purifying proteins (preys) were determined using two complementary, highly sensitive mass spectrometry methods: gel-free liquid chromatography-tandem mass spectrometry (LCMS) and gel-based peptide mass fingerprinting using matrix-assisted laser desorption/ionization time-of-flight mass spectrometry (MALDI-TOF MS).

For MALDI-TOF MS, protein identification was performed using the ProFound search engine, which matches the observed peaks against the database of theoretical peaks. The program runs ProFound on all the spectra using one set of conditions. In addition, a Java program was developed in-house which automates the re-running of Knexus/ProFound using 72 varying parameter sets and evaluates the aggregate results to produce a set of identified proteins in each case. Based on these results, it calculates a single confidence Z-score for candidate protein identifications. In the case of LCMS, the acquired spectra were matched to candidate peptide sequences by searching against an *E. coli* protein FASTA formatted sequence database using the SEQUEST search algorithm on a cluster computer [SEQUEST-PVM v.27], with peak lists automatically generated using the

embedded ExtractMS script with default parameter settings [5]. The STATQUEST filtering algorithm [6] was then applied to all putative search results to obtain a measure of the statistical reliability (confidence score) for each candidate identification. Taking into account of the low codon adaptation index (CAI) and mRNA expression levels of YgbT (Cas1) and other CRISPR associated proteins (Suppl. Fig. S5), we applied a modest threshold cut-off score for the interactions with > 40% probability and with a number of spectral count >1 for LCMS, and with a Z-score of > 0.7 for the MALDI-TOF MS. Using this cut-off, we identified 79 interacting proteins from YgbT SPA-tag purification (Figure 3A, Suppl. Table 2).

**Protocol S2 - Codon adaptation index and mRNA expression levels of CRISPR associated proteins.**

From the YgbT SPA-tag purification, except YgcJ (CasC) and YgcH (CasE), we were unable to detect the other Cas proteins even at low probability scores from two different mass spectrometry methods, suggesting that the Cas proteins are in low abundance, as reflected by their Codon Adaptation Index (CAI) and mRNA expression levels (Suppl. Fig. 5). The CAI values are frequently used to assess the extent of expression of a gene with respect to the constitutive expression level of the housekeeping genes (e.g., ribosomal proteins, chaperones etc). The CAI [7] score is calculated by identifying the genes coding for ribosomal proteins in *E. coli* K12 strain against a reference (ribosomal) codon usage table built using the EMBOSS program 'cusp' (<http://emboss.sourceforge.net/>). The mRNA expression levels of each gene were obtained from the M3D database [8].

**Protocol S3 - YgbT interacts genetically with DNA repair and recombination pathways.**

Recently we [9] and others [10] have exploited the natural bacterial conjugation and genetic transfer capacity of Hfr strains with the Keio [11] single gene deletion collection as the basis of a high-throughput method for examining genetic interactions in a genome-wide manner in *E. coli*. To the Keio collection, we also added 149 F<sup>-</sup> potentially-hypomorphic Kan<sup>R</sup>-marked strains with C-terminal SPA (Sequential Peptide Affinity) - tagged essential genes involved in conserved bacterial processes [12], signifying that the tag does not markedly preclude protein folding or function *per se*. We reasoned that alteration of the 3'-UTR via integration of the marker cassette could destabilize certain transcripts or, on rare occasion, impede the proper function of the fusion protein. Using this assay, we have screened Hfr *ygbT* deletion mutant as a query strain and crossed against all the *E. coli* genes (Suppl. Table 3).

The relative fitness of the *ygbT* double mutants produced by conjugation is digitally imaged, colony growth quantified and an interaction score (*S*) is calculated to quantify the strength and confidence of genetic interaction for each *E. coli* mutant gene pair (shown in Suppl. Table 3). Fitness defects in *E. coli* [9] are inferred as a function of normalized growth rates relative to unperturbed corresponding to single gene mutant references. The expectation is that, the growth rate of double mutant bearing two functionally unrelated genes should be approximately multiplicative in comparison with the two single mutants alone. An aggravating functional genetic relationship is conveyed by the non-additive slow growth or inviability of the double mutants relative to the expected summation of single deletion growth phenotypes, implying the genes are in

related pathways that converge on a common cellular process or function. Conversely, less than additive growth defects indicate an alleviating interaction, suggesting that the two genes in question belong to the same biological pathway (i.e. component subunits of a protein complex).

**Protocol S4 - Functional enrichment analysis of the genetic interactions of *ygbT***

Rather than choosing a pre-arbitrary interaction score ( $S$ ) threshold cut-off from the *ygbT* $\Delta::Cm^R$  genome wide genetic screen, we ranked the mutant gene pairs based on their interaction  $S$  scores (Suppl. Table 3) and identified the enrichment for a *priori* defined functionally related gene sets for GO terms spanning various biological processes using Gene Set Enrichment Analysis (GSEA) [13] (Suppl. Table 4) . We analyzed the two independent isolate strains (Isolate 1 and Isolate 2) of the same gene simultaneously, that is, for a given gene, say  $G$ , we treated them as  $G\_A$  and  $G\_B$ , respectively. We then evaluated the enrichment of GO gene sets using a standardized  $\chi^2$ -test that will allow us to compare gene sets of different sizes and different mean shifts [13].

$$E_g^{\chi^2} = \frac{\sum_{i \in A_g} (S_i - \bar{S})^2 - (N_g - 1)}{2 * (N_g - 1)}$$

In the above formula,  $S_i$  is the  $S$  score for gene  $i$  in gene set  $A_g$ ,  $\bar{S}$  is the mean  $S$  score of gene set  $A_g$ .  $N_g$  is the number of genes in  $A_g$ , when  $N_g$  is larger than 20,  $E_g^{\chi^2}$  follows a standard normal distribution. The enrichment  $P$  value of  $E_g^{\chi^2}$  is calculated based on the distribution. The calculated  $P$ -value is further adjusted using Benjamini and Hochberg [14] correction procedure to determine a  $Q$ -value. GO category gene sets with  $Q$ -value < 0.05 is considered to be significant. The result of this analysis is shown in Suppl. Table 4.

Of the 182 GO category gene sets considered for GSEA, 76 gene sets from *ygbT* genetic screen with a corrected *Q*-value below the cut-off ( $Q\text{-value} \leq 0.05$ ) showed enrichment for several major functional processes including GO terms related to DNA repair ( $Q < 0.002$ ), DNA recombination ( $2.79\text{E-}09$ ), and chromosomal segregation and condensation ( $Q < 0$ ) (Suppl. Table 4).

**Protocol S5 - YgbT interacts with cell division and chromosome segregation proteins.**

Homologous recombination during the cell division process can generate a chromosome dimer which is converted to monomers by XerD, a site specific tyrosine recombinase, mediating the formation of recombinant products in Holliday junction containing DNA molecules as reaction intermediates to permit the segregation at cell division [15,16]. Independent deletion of *xerD* and *mukB* alleles have shown to have aberrant chromosomal segregation [17]. The *ftsK* allele activates the Xer recombination not only in localizing and coordinating these activities in DNA replication, occurring close to the midcell of newborn cells but also directly participate in the separation processes [16]. In *E. coli*, decatenation is mediated by ParC, a subunit of topoisomerase IV (Topo IV). When homologous recombination between newly replicated sister chromosomes undergo an odd number of crossovers, it results in a single dimeric chromosome. Such dimers are converted to monomers by site-specific tyrosine recombinases, XerC and XerD [18,19]. In this case, the observed SSL interactions likely occur because reduced levels of *xerD*, *parC*, *ftsK-SPA*, and *mukB-SPA* alleles resulting from the inactivation of the *ygbT* mutant might be necessary for an effective co-ordination in linking cell division and chromosomal segregation.

## **Protocol S6 - Validation of Genetic Interactions Using Custom Mini-Array eSGA Screening**

Reliability of SSL interactions of *ygbT* with *rec* or *ruv* is validated using custom mini-array eSGA screening. The *recA*, *recB*, *recC*, *recD*, *ruvA*, *ruvB*, *ruvC*, *csdA* and *rpoS* query deletion strains were first constructed by replacing the target gene in Hfr Cavalli with a chloramphenicol (Cm) resistance marker, using the  $\lambda$ -Red system as essentially previously described [9]. The recipient array is then constructed by placing 120ul of the overnight culture of *ygbT*, *proV*, *recA*, *ascB*, *yobB*, *ruvA*, *ruvB*, *ruvC*, *yecT*, *aas*, *recB*, *recC*, *recD* and *exo* non-essential single gene deletion mutants obtained from the Keio collection [11] knock-out library, selected for kanamycin (Kan), into a 96-well plate. The recipient array is subsequently pinned on to a LB-Kan from 96-well plate into a 384 higher density. In parallel, the overnight culture of the Hfr Cavalli query deletion strains, selected for Cm, were pinned independently onto a LB-Cm plate in 384 densities. Both recipient and donor plates are incubated at 32 °C for 16 hrs. Robotically, the overnight solid donor and recipient plates were pinned onto a LB-agar conjugation plate which is incubated again for 16 hrs at 32 °C. After two rounds of double antibiotic selection on LB-Kan-Cm, the plates were inspected manually and colonies were compared to the donor/recipient combinations.

### **SUPPLEMENTAL PROTOCOL REFERENCES**

1. Makarova KS, Grishin NV, Shabalina SA, Wolf YI, Koonin EV (2006) A putative RNA-interference-based immune system in prokaryotes: computational analysis of the predicted enzymatic machinery, functional analogies with eukaryotic RNAi, and hypothetical mechanisms of action. Biol Direct pp. 7.



2. Wiedenheft B, Zhou K, Jinek M, Coyle SM, Ma W, et al. (2009 ) Structural basis for DNase activity of a conserved protein implicated in CRISPR-mediated genome defense. *Structure* 17: 904-912.
3. Lilley DMJ, White MF (2001) The junction-resolving enzymes. *Nature Reviews Molecular Cell Biology* 2: 433-443.
4. Babu M, Butland G, Pogoutse O, Li J, Greenblatt JF, et al. (2009) Sequential Peptide Affinity Purification System for the Systematic Isolation and Identification of Protein Complexes from *Escherichia coli*. *Methods in Molecular Biology* 564: 373-400.
5. Eng JK, McCormack AL, Yates IIIJR (1994 ) An approach to correlate tandem mass spectral data of peptides with amino acid sequences in a protein database. *Journal of the American Society for Mass Spectrometry* 5: 976-989.
6. Kislinger T, Rahman K, Radulovic D, Cox B, Rossant J, et al. (2003) PRISM, a generic large scale proteomic investigation strategy for mammals. . *Mol Cell Proteomics* 2: 96-106.
7. Sharp PM, Li W-H (1987) The codon adaptation index - a measure of directional synonymous codon usage bias, and its potential applications. *Nucleic Acids Research* 15: 1281-1295.
8. Faith JJ, Driscoll ME, Fusaro VA, Cosgrove EJ, Hayete B, et al. (2008) Many Microbe Microarrays Database: uniformly normalized Affymetrix compendia with structured experimental metadata. *Nucleic Acids Res* 36 (Database issue): D866-870.
9. Butland G, Babu M, Díaz-Mejía JJ, Bohdana F, Phanse S, et al. (2008) eSGA: *E. coli* synthetic genetic array analysis. *Nat Methods* 5: 789-795.
10. Typas A, Nichols RJ, Siegele DA, Shales M, Collins SR, et al. (2008) High throughput, quantitative analyses of genetic interactions in *E. coli*. *Nat Methods* 5: 781-787.
11. Baba T, Ara T, Hasegawa M, Takai Y, Okumura Y, et al. (2006) Construction of *Escherichia coli* K-12 in-frame, single-gene knockout mutants: the Keio collection. *Mol Syst Biol* 2: 2006.0008.
12. Butland G, Peregrín-Alvarez JM, Li J, Yang W, Yang X, et al. (2005) Interaction network containing conserved and essential protein complexes in *Escherichia coli*. *Nature* 433 531–537.
13. Irizarry RA, Wang C, Zhou Y, Speed TP (2009) Gene Set Enrichment Analysis Made Simple. John Hopkins University Dept. of Biostatistics Working Papers. : Working Paper 185.
14. Benjamini Y, Hochberg Y (1995) Controlling the false discovery rate- a practical and powerful approach to multiple testing. . *JR Stat Soc Ser B*57: 289-300.
15. Arciszewska LK, Grainge I, Sherratt DJ (1997) Action of site-specific recombinases XerC and XerD on tethered Holliday junctions. *EMBO Journal* 16: 3731-3743.
16. Sherratt DJ, Lau IF, Barre F-Xa (2001) Chromosome segregation. *Current Opinion in Microbiology* 4: 653-659.
17. Gordon GS, Wright A (2000.) DNA SEGREGATION IN BACTERIA. *Annual Review Microbiology* 54: 681–708.

18. Zechiedrich EL, Khodursky AB, Cozzarelli NR (1997) Topoisomerase IV, not gyrase, decatenates products of site-specific recombination in *Escherichia coli*. *Genes Dev* 1: 2580-2592.
19. Barre FX, Søballe B, Michel B, Aroyo M, Robertson M, et al. (2001) Circles: the replication-recombination-chromosome segregation connection. *Proc Natl Acad Sci USA* 98 8189–8195.
